# Supplementary material for: Effect of Iron Limitation, Elevated Temperature, and Florfenicol on the Proteome and Vesiculation of the Fish Pathogen Aeromonas salmonicida
Source: Microorganisms. 2022 Aug 27;10(9):1735. doi: 10.3390/microorganisms10091735 (PMC9503180; doi:10.3390/microorganisms10091735)
Supplement: Supplementary file 1 [file microorganisms-10-01735-s001.zip]

Archive with 4 entries (4 files):
- Supplement_figures.pdf
- Supplement_table_S1.xlsx
- Supplement_table_S2.xlsx
- Supplement_table_S3.xlsx
