# Supplementary material for: Effect of Iron Limitation, Elevated Temperature, and Florfenicol on the Proteome and Vesiculation of the Fish Pathogen Aeromonas salmonicida
Source: Microorganisms. 2022 Aug 27;10(9):1735. doi: 10.3390/microorganisms10091735 (PMC9503180; doi:10.3390/microorganisms10091735)
Supplement: Supplementary file 1 [file microorganisms-10-01735-s001.zip › Supplement_table_S1.xlsx]

## Sheet: Overview
Effect of iron-limitation, elevated incubation temperature and florfenicol antibiotics on the subcellular proteomes and the vesiculation of the fish pathogen Aeromonas salmonicida
Authors: Tobias Kroniger, Mina Mehanny, Rabea Schlüter, Gregor Fuhrmann, Anke Trautwein-Schult, Bernd Köllner, and Dörte Becher
Overview of supplementary table S1 content:
Sheet 1	Overview of supplementary table content
Sheet 2	Overall protein identifications	All quantified proteins are listed with their UniProt protein IDs, gene names, annotated UniProt protein names, the predicted PSORTb localization, the predicted SignalP output, the predicted eggNOG COG category, the respective results of the mass spectrometry search and the quantitative information of the proteins in the respective subcellular fractions
Sheet 3	Quantified proteins in control (Ctrl) condition	Quantified proteins of the control condition are listed with their UniProt protein IDs, gene names, annotated UniProt protein names, the predicted PSORTb localization, the predicted SignalP output , the predicted eggNOG COG category, the respective results of the mass spectrometry search and the quantitative information of the proteins in the respective subcellular fractions
Sheet 4	Quantified proteins in iron limitation (FeLim) condition	Quantified proteins of the iron limitation condition are listed with their UniProt protein IDs, gene names, annotated UniProt protein names, the predicted PSORTb localization, the predicted SignalP output , the predicted eggNOG COG category, the respective results of the mass spectrometry search and the quantitative information of the proteins in the respective subcellular fractions
Sheet 5	Quantified proteins in elevated temperature (Temp) condition	Quantified proteins of the elevated temperature condition are listed with their UniProt protein IDs, gene names, annotated UniProt protein names, the predicted PSORTb localization, the predicted SignalP output , the predicted eggNOG COG category, the respective results of the mass spectrometry search and the quantitative information of the proteins in the respective subcellular fractions
Sheet 6	Quantified proteins in antibiotic (AB) condition	Quantified proteins of the antibiotic condition are listed with their UniProt protein IDs, gene names, annotated UniProt protein names, the predicted PSORTb localization, the predicted SignalP output , the predicted eggNOG COG category, the respective results of the mass spectrometry search and the quantitative information of the proteins in the respective subcellular fractions
Sheet 7	Exclusive proteins in control (Ctrl) condition	Proteins that were only quantified in the control (Ctrl) condition are listed with their UniProt protein IDs, gene names, annotated UniProt protein names, the predicted PSORTb localization, the predicted SignalP output, the predicted eggNOG COG category, the respective results of the mass spectrometry search and the quantitative information of the proteins in the respective subcellular fractions
Sheet 8	Exclusive proteins in iron limitation (FeLim) condition	Proteins that were only quantified in the iron limitation (FeLim) condition are listed with their UniProt protein IDs, gene names, annotated UniProt protein names, the predicted PSORTb localization, the predicted SignalP output, the predicted eggNOG COG category, the respective results of the mass spectrometry search and the quantitative information of the proteins in the respective subcellular f…
Sheet 9	Exclusive proteins in elevated temperature (Temp) condition	Proteins that were only quantified in the elevated temperature (Temp) condition are listed with their UniProt protein IDs, gene names, annotated UniProt protein names, the predicted PSORTb localization, the predicted SignalP output, the predicted eggNOG COG category, the respective results of the mass spectrometry search and the quantitative information of the proteins in the respective subcellul…
Sheet 10	Exclusive proteins in antibiotic (AB) condition	Proteins that were only quantified in the antibiotic (AB) condition are listed with their UniProt protein IDs, gene names, annotated UniProt protein names, the predicted PSORTb localization, the predicted SignalP output, the predicted eggNOG COG category, the respective results of the mass spectrometry search and the quantitative information of the proteins in the respective subcellular fractions
Sheet 11	Exclusive proteins in stress conditions	Proteins that were only quantified in the stress conditions are listed with their UniProt protein IDs, gene names, annotated UniProt protein names, the predicted PSORTb localization, the predicted SignalP output, the predicted eggNOG COG category, the respective results of the mass spectrometry search and the quantitative information of the proteins in the respective subcellular fractions
Sheet 12	Exclusive proteins in FeLim & Temp condition	Proteins that were only quantified in the iron limitation (FeLim) and elevated temperature (Temp) condition are listed with their UniProt protein IDs, gene names, annotated UniProt protein names, the predicted PSORTb localization, the predicted SignalP output, the predicted eggNOG COG category, the respective results of the mass spectrometry search and the quantitative information of the proteins…
Sheet 13	Exclusive proteins in FeLim & AB condition	Proteins that were only quantified in the iron limitation (FeLim) and antibiotic (AB) condition are listed with their UniProt protein IDs, gene names, annotated UniProt protein names, the predicted PSORTb localization, the predicted SignalP output, the predicted eggNOG COG category, the respective results of the mass spectrometry search and the quantitative information of the proteins in the resp…
Sheet 14	Exclusive proteins in Temp & AB condition	Proteins that were only quantified in the elevated temperature (Temp) and antibiotic (AB) condition are listed with their UniProt protein IDs, gene names, annotated UniProt protein names, the predicted PSORTb localization, the predicted SignalP output, the predicted eggNOG COG category, the respective results of the mass spectrometry search and the quantitative information of the proteins in the …
Sheet 11	PSORTb result	Output of the bioinformatic tool PSORTb with the results for each of the annotated proteins of the A. salmonicida subsp. salmonicida strain M22710-11 (ID UP000232113, 4182 entries, download 25th June 2021) and their scoring for the different applied analytical modules are shown
Sheet 12	SignalP result	Output of the bioinformatic tool SignalP for the A. salmonicida subsp. salmonicida strain M22710-11 (ID UP000232113, 4182 entries, download 25th June 2021) with the scoring for each protein
Sheet 13	eggNOG result	Output of the bioinformatic tool eggNOG for the A. salmonicida subsp. salmonicida strain M22710-11 (ID UP000232113, 4182 entries, download 25th June 2021) with the scoring and information for each protein

## Sheet: Overall_protein_identifications
Overview of all protein identifications
In this table all identified proteins of this study are listed with their UniProt protein IDs, gene names, annotated UniProt protein names, the predicted PSORTb localization, the predicted SignalP output, the predicted COG category, eggNOG description and the respective results of the mass spectrometry search. Log2 transformed LFQ intensities of identified proteins are shown depending on their co…
Majority protein IDs	Protein Name	Gene names	SignalP	PSORTb	COG Category	eggNOG description	Encoded by	LFQ intensity Ctrl1_Cyt log2	LFQ intensity Ctrl2_Cyt log2	LFQ intensity Ctrl3_Cyt log2	LFQ intensity Ctrl4_Cyt log2	LFQ intensity FeLim1_Cyt log2	LFQ intensity FeLim2_Cyt log2	LFQ intensity FeLim3_Cyt log2	LFQ intensity FeLim4_Cyt log2	LFQ intensity AB1_Cyt log2	LFQ intensity AB2_Cyt log2	LFQ intensity AB3_Cyt log2	LFQ intensity AB4_Cyt log2	LFQ intensity Temp1_Cyt log2	LFQ intensity Temp2_Cyt log2	LFQ intensity Temp3_Cyt log2	LFQ intensity Temp4_Cyt log2	LFQ intensity Ctrl1_IM log2	LFQ intensity Ctrl2_IM log2	LFQ intensity Ctrl3_IM log2	LFQ intensity Ctrl4_IM log2	LFQ intensity FeLim1_IM log2	LFQ intensity FeLim2_IM log2	LFQ intensity FeLim3_IM log2	LFQ intensity FeLim4_IM log2	LFQ intensity AB1_IM log2	LFQ intensity AB2_IM log2	LFQ intensity AB3_IM log2	LFQ intensity AB4_IM log2	LFQ intensity Temp1_IM log2	LFQ intensity Temp2_IM log2	LFQ intensity Temp3_IM log2	LFQ intensity Temp4_IM log2	LFQ intensity Ctrl1_OM log2	LFQ intensity Ctrl2_OM log2	LFQ intensity Ctrl3_OM log2	LFQ intensity Ctrl4_OM log2	LFQ intensity FeLim1_OM log2	LFQ intensity FeLim2_OM log2	LFQ intensity FeLim3_OM log2	LFQ intensity FeLim4_OM log2	LFQ intensity AB1_OM log2	LFQ intensity AB2_OM log2
A0A0B0EXN8	Recombination-associated protein RdgC	rdgC ASJ32_08995	OTHER	Cytoplasmic	L	May be involved in recombination	Chromosome	23.1793	24.4012	NaN	NaN	24.5048	23.0597	21.6822	21.2403	23.8272	22.6464	NaN	22.2572	25.2368	22.2293	23.5822	NaN	NaN	NaN	NaN	NaN	NaN	NaN	NaN	20.9293	NaN	NaN	NaN	NaN	NaN	NaN	NaN	20.872	NaN	NaN	NaN	NaN	NaN	NaN	NaN	NaN	NaN	NaN
A0A0K0MDT1	Non-ribosomal peptide synthetase (Peptide synthetase)	amoF ASJ32_11185	OTHER	CytoplasmicMembrane	Q	COG1020 Non-ribosomal peptide synthetase modules and related proteins	Chromosome	23.3189	22.6046	22.9657	22.4524	28.8784	29.0881	28.6209	27.689	20.7676	18.1282	20.1403	NaN	22.3853	21.8685	19.0894	20.4026	24.8248	23.472	24.8759	23.9654	29.5312	29.8256	29.9251	29.4868	21.6567	23.0089	21.931	22.9917	23.7088	23.4048	22.5818	23.3303	NaN	NaN	NaN	NaN	22.3385	22.037	21.394	22.2556	NaN	NaN
A0A0K0MDT9	Peptide synthetase	amoH ASJ32_11170	OTHER	Cytoplasmic	Q	COG1020 Non-ribosomal peptide synthetase modules and related proteins	Chromosome	NaN	NaN	NaN	NaN	25.6995	26.0535	26.0498	25.9301	NaN	NaN	NaN	NaN	NaN	NaN	NaN	20.1216	20.0422	21.9551	NaN	22.1405	26.9495	27.2465	27.4141	27.3267	NaN	NaN	NaN	NaN	NaN	NaN	NaN	21.5218	NaN	NaN	NaN	NaN	19.406	19.6604	19.6364	20.5575	NaN	NaN
A0A0K0MDU1	ABC transporter substrate-binding protein (Amonabactin ABC transporter substrate-binding protein)	ASJ32_11165 GO994_14085	SP(Sec/SPI)	Periplasmic	P	Periplasmic binding protein	Chromosome	21.2151	22.1074	22.0073	21.3433	25.8407	25.7675	26.1487	25.7347	NaN	20.6097	19.2433	19.2234	20.0815	19.0982	NaN	19.5098	NaN	NaN	NaN	NaN	NaN	20.3117	NaN	20.588	NaN	NaN	NaN	NaN	NaN	NaN	NaN	NaN	NaN	NaN	NaN	NaN	NaN	NaN	NaN	NaN	NaN	NaN
A0A0X1L5K6	MobC (Mobilization protein)	mobC ASJ32_22495	OTHER	Unknown	S	Bacterial mobilisation protein (MobC)	Plasmid pAsal1C; Plasmid pAsal1D	23.838	22.7758	24.3329	24.7438	24.9885	24.6687	24.5666	24.991	23.2544	23.1291	24.8343	24.1454	24.1263	22.9465	24.6632	23.8642	24.428	24.7819	24.3524	25.4669	25.5008	25.3373	25.9778	26.2547	23.1516	24.2436	23.4057	24.8899	23.9531	23.9296	24.7777	24.8939	NaN	NaN	NaN	NaN	NaN	NaN	NaN	NaN	NaN	NaN
A0A151KDW8	Mobilization protein	ASJ32_22395 UC37_22540	OTHER	Unknown	S	Bacterial mobilisation protein (MobC)	Plasmid pAsa1	24.3257	23.5071	25.2961	25.2089	25.2162	25.3562	25.575	25.7989	24.4559	24.1131	25.9524	24.861	24.8012	24.5607	25.8201	25.6039	24.7443	26.2204	25.0766	25.1926	25.3701	26.096	26.6389	27.1857	24.6551	24.5705	24.6121	25.3147	24.9017	25.092	25.8592	25.6813	NaN	NaN	NaN	NaN	NaN	NaN	NaN	NaN	NaN	14.8877
A0A151KE03	Uncharacterized protein	ASJ32_22370 UC37_22515	OTHER	Cytoplasmic	-	-	Plasmid pAsa1	NaN	NaN	NaN	NaN	21.8674	NaN	22.37	NaN	NaN	NaN	NaN	NaN	NaN	NaN	NaN	NaN	NaN	NaN	NaN	NaN	NaN	NaN	NaN	NaN	NaN	NaN	NaN	NaN	NaN	NaN	NaN	NaN	NaN	NaN	NaN	NaN	NaN	NaN	NaN	NaN	NaN	NaN
A0A151KED4	Uncharacterized protein	ASJ32_22405 UC37_22550	OTHER	Unknown	-	-	Plasmid pAsa1	23.7733	23.8349	24.0568	24.154	23.7735	23.9735	23.9048	23.9567	23.6452	23.1683	24.7621	23.8532	23.8312	23.0643	24.2221	23.9786	NaN	NaN	22.5037	NaN	22.378	NaN	21.6351	NaN	NaN	NaN	21.3402	NaN	22.1955	NaN	NaN	21.8919	NaN	NaN	NaN	NaN	NaN	NaN	NaN	NaN	NaN	NaN
A0A151KEJ1	Uncharacterized protein	ASJ32_22425 UC37_22585	OTHER	Unknown	-	-	Plasmid pAsa2	24.8517	25.4522	25.7736	25.3915	26.1225	25.6908	25.6327	26.8056	25.323	25.2	25.4664	25.628	25.2228	25.8828	26.4036	26.5224	21.6982	NaN	NaN	21.6005	23.0001	24.5278	23.0082	24.2777	21.6716	22.8825	21.8044	22.7186	22.1881	22.1464	NaN	NaN	NaN	NaN	NaN	NaN	NaN	NaN	NaN	NaN	NaN	NaN
A0A1Q4MBA1	Mobile element protein (Transposase)	ASJ32_22800 ASJ32_22820	OTHER	Unknown	L	Transposase and inactivated derivatives	Plasmid pAsa5	22.2132	22.0107	21.0505	NaN	22.2336	23.2578	22.4925	22.8	22.65	22.2255	22.158	21.1453	23.3467	23.169	23.5331	22.8032	21.496	NaN	NaN	NaN	21.7257	NaN	NaN	NaN	NaN	NaN	NaN	NaN	NaN	NaN	NaN	NaN	NaN	NaN	NaN	NaN	NaN	NaN	NaN	NaN	NaN	NaN
A0A1Q4MBX9	Protein-tyrosine-phosphatase (EC 3.1.3.48)	aopH ASJ32_22565	OTHER	Extracellular	T	Protein tyrosine phosphatase, catalytic domain	Plasmid pAsa5	24.8002	24.455	23.5692	24.7028	25.7981	25.1764	25.4756	25.5106	23.5086	24.0913	22.8792	24.3878	24.4245	24.2571	21.7957	26.0361	22.4958	23.3717	22.3396	23.5336	22.527	23.6117	23.9336	25.0472	21.8124	23.4086	22.5761	22.6055	22.8423	22.5133	22.1406	23.3974	NaN	NaN	NaN	NaN	NaN	NaN	NaN	NaN	NaN	NaN
A0A1Q4MCG7	DNA-binding protein	ASJ32_22130	OTHER	Cytoplasmic	L	Belongs to the histone-like protein H-NS family	Plasmid pAsa5	26.7614	26.6486	26.7107	28.4386	26.6228	28.1277	27.2944	28.949	25.9971	27.6467	26.6171	27.7634	26.2513	26.6465	27.206	28.16	NaN	NaN	NaN	NaN	21.8538	23.8466	23.9653	25.0407	NaN	NaN	NaN	NaN	NaN	NaN	NaN	NaN	NaN	NaN	NaN	NaN	NaN	NaN	NaN	NaN	NaN	NaN
A0A1Q4MCH7	Uncharacterized protein	ASJ32_22120	OTHER	Unknown	-	-	Plasmid pAsa5	24.3399	24.5445	23.8198	23.2121	23.9419	23.4182	23.9595	22.9772	24.2166	23.5459	23.8165	22.9042	24.421	25.1041	23.489	22.9852	22.2854	NaN	22.5661	NaN	22.9257	22.6316	22.1257	21.7189	21.7396	22.3287	23.1742	NaN	23.0912	22.6198	21.488	NaN	NaN	NaN	NaN	NaN	NaN	NaN	NaN	NaN	NaN	NaN
A0A1Q4MCI1	KfrA protein	kfrA ASJ32_21920	OTHER	Cytoplasmic	S	Plasmid replication region DNA-binding N-term	Plasmid pAsa5	24.7599	24.6157	25.4285	25.099	24.3406	25.1384	24.9313	24.9986	25.0354	24.8938	25.9612	24.7872	24.5651	23.7435	25.831	24.9989	NaN	NaN	NaN	NaN	NaN	NaN	NaN	NaN	NaN	NaN	NaN	NaN	NaN	NaN	NaN	NaN	NaN	NaN	NaN	NaN	NaN	NaN	NaN	NaN	NaN	NaN
A0A1Q4MCI4	Uncharacterized protein	ASJ32_21935	OTHER	Unknown	-	-	Plasmid pAsa5	NaN	NaN	NaN	NaN	NaN	NaN	23.0414	NaN	NaN	NaN	NaN	NaN	NaN	21.215	NaN	NaN	25.0026	NaN	24.5945	25.5704	25.3094	24.4721	25.2431	25.2839	23.4803	24.0264	23.1392	23.668	23.8127	23.8661	26.1809	25.2715	NaN	NaN	NaN	NaN	NaN	NaN	NaN	NaN	NaN	NaN
A0A1Q4MCJ6	NYN-domain containing protein	ASJ32_21925	OTHER	Cytoplasmic	S	NYN domain	Plasmid pAsa5	22.3702	23.0726	22.8654	22.6287	21.8521	NaN	22.9897	NaN	23.1331	22.3144	23.8925	NaN	22.7385	23.1739	24.4441	22.2903	25.2192	23.3441	25.7473	24.5875	25.1045	25.1907	25.082	24.9453	25.682	25.8394	25.2891	24.6295	25.3839	25.1712	24.9295	25.2328	NaN	NaN	NaN	NaN	NaN	NaN	NaN	NaN	NaN	NaN
A0A1Q4MD05	AAA family ATPase (Chromosome partitioning protein ParA) (Partitioning protein ParA)	parA ASJ32_22625 GO994_22695	OTHER	Cytoplasmic	-	-	Plasmid p1AsJ410; Plasmid p1asj410; Plasmid pAsa5	23.6518	23.3704	24.0004	24.7237	24.0783	24.1011	25.543	24.7008	23.0822	23.6166	24.8887	24.5478	24.5449	23.1126	25.9743	25.5063	27.7598	28.6298	28.0202	28.2785	28.1122	28.0583	28.4929	28.2112	28.0659	27.8673	27.8342	27.5861	28.2722	27.9384	28.6612	28.4082	20.6419	19.9635	19.8546	20.7992	20.9076	19.888	20.0921	20.3993	20.3728	21.1504
A0A1Q4MD09	Resolvase/Integrase TinR protein (Transposon DNA-invertase)	tniR ASJ32_21760	OTHER	Unknown	L	DNA invertase	Plasmid pAsa5	NaN	NaN	20.9886	NaN	NaN	NaN	NaN	NaN	NaN	NaN	21.7846	NaN	NaN	NaN	NaN	NaN	23.0621	22.8736	23.3028	24.0152	22.7572	22.8319	23.6131	22.7953	23.9345	23.7285	24.0877	24.3017	23.1315	23.1659	24.3121	24.0595	NaN	NaN	NaN	NaN	NaN	NaN	NaN	NaN	NaN	17.2897
A0A1Q4MD10	Hydrolase	ASJ32_21765	OTHER	CytoplasmicMembrane	S	Domain of unknown function (DUF1705)	Plasmid pAsa5	21.581	20.9977	22.6432	22.6764	21.0139	21.2596	21.0609	NaN	21.8361	20.9159	23.1651	21.9223	21.8978	21.4723	22.4418	21.9513	27.9578	26.7771	27.7479	28.1441	27.2105	27.0781	26.8466	26.7064	27.9376	27.9516	28.306	28.1392	27.4447	27.6411	28.5025	27.8967	NaN	NaN	NaN	NaN	NaN	NaN	NaN	NaN	NaN	NaN
A0A1Q4MD13	Hydrolase	ASJ32_21770	OTHER	CytoplasmicMembrane	S	Domain of unknown function (DUF1705)	Plasmid pAsa5	21.8531	21.7208	22.9493	23.3907	19.9399	21.1314	NaN	21.9499	21.6367	21.8984	23.2747	22.4696	22.7437	21.8797	24.6078	22.777	29.04	28.0914	29.1265	29.5369	28.818	28.5224	28.0192	28.445	29.0974	28.8772	29.5073	29.1157	28.9822	29.3148	29.6407	29.0563	15.7252	17.6403	17.0453	18.1281	18.7681	NaN	17.8905	NaN	18.2208	18.3494
A0A1Q4MD26	Uncharacterized protein	ASJ32_21560	OTHER	Unknown	-	-	Plasmid pAsa5	22.7868	21.8219	22.6217	23.4551	24.5067	24.0273	23.3653	24.7522	22.2776	21.6394	23.1561	23.0149	23.6251	23.1061	NaN	24.5747	21.0167	22.4804	NaN	22.1305	21.6422	22.5472	22.6815	22.4528	20.0838	NaN	20.705	21.9831	NaN	NaN	NaN	NaN	NaN	NaN	NaN	NaN	NaN	NaN	NaN	NaN	NaN	NaN
A0A1Q4MD37	Methionine repressor-like protein (Programmed cell death antitoxin YdcD)	ydcD ASJ32_21535	OTHER	Unknown	S	Ribbon-helix-helix domain	Plasmid pAsa5	19.4741	NaN	20.4166	22.7506	19.321	NaN	22.588	21.0245	19.3448	20.6575	21.5418	22.6274	NaN	NaN	21.0212	22.5494	NaN	NaN	NaN	NaN	NaN	NaN	21.1284	20.8782	NaN	NaN	NaN	NaN	NaN	NaN	NaN	NaN	NaN	NaN	NaN	NaN	NaN	NaN	NaN	NaN	NaN	NaN
A0A1Q4MD38	Cobyrinic acid a,c-diamide synthase (Cobyrinic acid ac-diamide synthase)	ASJ32_21755	OTHER	Unknown	D	VirC1 protein	Plasmid pAsa5	NaN	NaN	NaN	NaN	NaN	NaN	NaN	NaN	NaN	NaN	NaN	NaN	NaN	NaN	NaN	NaN	22.6046	NaN	23.3621	22.4124	22.356	21.7636	NaN	NaN	NaN	21.4389	21.9519	NaN	22.7965	NaN	NaN	21.8706	NaN	NaN	NaN	NaN	NaN	NaN	NaN	NaN	NaN	NaN
A0A1Q4MD40	Chromosome partitioning protein ParA (Partitioning protein ParA)	parA ASJ32_21565	OTHER	Cytoplasmic	D	Cellulose biosynthesis protein BcsQ	Plasmid pAsa5	22.189	22.3481	NaN	22.8139	23.1317	21.3146	22.268	NaN	NaN	NaN	NaN	NaN	21.6425	22.8561	NaN	21.6285	26.5274	24.679	26.513	25.7995	26.1612	25.222	25.7589	24.9275	26.3707	25.4032	26.3559	25.5668	26.3289	25.8806	25.8675	25.9258	NaN	NaN	NaN	NaN	NaN	NaN	NaN	NaN	NaN	NaN
A0A1Q4MD41	Uncharacterized protein	ASJ32_21585	OTHER	Unknown	-	-	Plasmid pAsa5	24.8452	25.0148	25.8817	25.3815	24.9493	24.8309	25.3535	25.187	25.4738	24.6012	22.7728	23.2656	25.1401	25.1982	24.195	24.4291	21.9616	NaN	24.1688	20.9834	23.7843	23.3286	23.5584	22.5922	22.9529	22.9779	NaN	NaN	NaN	NaN	NaN	22.9899	NaN	NaN	NaN	NaN	NaN	NaN	NaN	NaN	NaN	NaN
A0A1Q4MD46	Resolvase	ASJ32_21530	OTHER	Cytoplasmic	L	Resolvase, N terminal domain	Plasmid pAsa5	21.1386	21.3351	NaN	23.2002	22.0595	22.3474	21.0689	22.6331	20.8278	NaN	NaN	22.2159	22.6957	22.0021	22.2364	24.3725	25.681	26.8436	25.3375	26.5891	26.7352	26.4079	27.2482	27.333	24.8848	25.2997	25.5791	26.0193	26.0591	25.7744	26.7287	26.85	19.2599	19.8686	19.8763	19.626	19.5578	19.5676	19.8297	19.6243	19.4965	19.8185
A0A1Q4MDA0	Plasmid replication protein RepB	repB ASJ32_21735	OTHER	Unknown	-	-	Plasmid pAsa5	20.7459	21.8762	NaN	NaN	22.1005	NaN	23.0342	22.1856	23.7167	NaN	NaN	23.3502	22.9126	22.8122	23.6884	NaN	22.0516	NaN	NaN	NaN	24.4329	22.6521	23.5446	23.4096	NaN	22.732	22.5948	22.0283	22.8633	NaN	NaN	22.0159	NaN	NaN	NaN	NaN	NaN	NaN	NaN	NaN	NaN	NaN
A0A1Q4MF46	Uncharacterized protein	ASJ32_20375	OTHER	Unknown	-	-	Plasmid pAsa5	27.355	26.7869	28.1047	28.6278	27.1471	27.935	27.272	27.8707	27.2951	27.7268	29.3372	28.3159	27.4667	27.623	28.217	28.415	22.1294	23.7651	21.1616	NaN	NaN	22.7684	NaN	NaN	NaN	22.1832	NaN	22.1328	NaN	NaN	NaN	NaN	NaN	NaN	NaN	NaN	NaN	NaN	NaN	NaN	NaN	NaN
A0A1Q4MF66	Relaxosome protein TraM	traM ASJ32_21200	OTHER	Cytoplasmic	-	-	Plasmid pAsa5	23.7787	22.2295	NaN	NaN	24.9848	23.0633	22.7004	23.5267	22.3041	22.1668	NaN	23.0654	22.7329	22.0747	21.9258	21.8318	22.3975	22.6992	22.58	NaN	23.1652	23.1126	24.186	24.265	22.8239	22.7711	20.4733	23.2148	22.9348	22.4759	NaN	22.9573	NaN	NaN	NaN	NaN	NaN	NaN	NaN	NaN	NaN	NaN
A0A1Q4MF68	Cobyrinic acid ac-diamide synthase (Partitioning protein ParA)	parA ASJ32_20370	OTHER	Cytoplasmic	D	COG1192 ATPases involved in chromosome partitioning	Plasmid pAsa5	23.7609	23.2638	23.3098	22.8031	23.2826	22.9271	22.8743	22.0307	21.8296	22.5809	23.0311	22.2141	23.4486	22.7168	NaN	23.1051	25.7046	25.0336	24.9549	24.7029	25.3783	25.609	25.709	24.8633	24.8116	25.0696	24.8573	25.1399	25.176	24.6964	24.2504	25.4671	NaN	NaN	NaN	NaN	NaN	NaN	NaN	NaN	NaN	NaN
A0A1Q4MF72	Plasmid replication protein RepB	ASJ32_20365	OTHER	Unknown	-	-	Plasmid pAsa5	23.827	22.9745	24.0195	23.0913	23.0847	24.6314	22.5566	23.4248	24.1656	23.1359	23.4305	24.7436	24.1325	23.1446	22.9442	23.0913	NaN	NaN	NaN	NaN	19.6114	20.8734	NaN	NaN	NaN	NaN	NaN	NaN	NaN	NaN	NaN	NaN	NaN	NaN	NaN	NaN	NaN	NaN	NaN	NaN	NaN	NaN
A0A1Q4MF77	DNA repair protein (DNA repair protein RadC)	ASJ32_21255	OTHER	Cytoplasmic	L	Belongs to the UPF0758 family	Plasmid pAsa5	23.8482	23.5052	25.0138	24.126	23.3645	24.2753	23.498	23.9317	24.6164	25.3278	24.7986	24.9452	23.5982	22.775	24.1225	24.4287	20.9872	20.6583	21.6575	21.3602	NaN	NaN	NaN	NaN	22.4274	21.6184	21.5047	NaN	21.9276	NaN	NaN	NaN	NaN	NaN	NaN	NaN	NaN	NaN	NaN	NaN	NaN	NaN
A0A1Q4MF78	Ribonuclease VapC (RNase VapC) (EC 3.1.-.-) (Toxin VapC)	vapC ASJ32_21275 GO994_12350	OTHER	Unknown	S	Toxic component of a toxin-antitoxin (TA) module. An RNase	Plasmid pAsa5	25.495	25.4061	25.7428	24.7778	25.1046	25.826	24.8669	25.0678	25.8169	26.1414	24.6208	26.0647	25.2781	25.0897	23.7388	24.1831	NaN	NaN	22.3285	22.2251	20.4402	21.8194	NaN	NaN	NaN	23.9288	22.5777	NaN	NaN	21.7723	NaN	NaN	NaN	NaN	NaN	NaN	NaN	NaN	NaN	NaN	NaN	NaN
A0A1Q4MF90	Conjugal transfer protein TraT (IncF plasmid conjugative transfer surface exclusion protein TraT)	traT ASJ32_20480	LIPO(Sec/SPII)	OuterMembrane	S	Enterobacterial TraT complement resistance protein	Plasmid pAsa5; Plasmid pAsa9	NaN	NaN	NaN	NaN	NaN	NaN	NaN	NaN	NaN	NaN	NaN	NaN	NaN	NaN	NaN	NaN	22.0012	20.8877	21.9964	22.6958	21.9881	21.9457	21.5102	22.4589	NaN	NaN	21.0344	21.1764	21.9136	22.0761	21.8661	22.4391	NaN	17.9413	17.6252	16.534	17.4532	17.3305	NaN	17.7211	NaN	NaN
A0A1Q4MF96	Uncharacterized protein	ASJ32_21290	OTHER	Unknown	-	-	Plasmid pAsa5	21.3428	20.7078	NaN	21.6687	21.8737	NaN	NaN	NaN	21.4334	21.8072	NaN	NaN	NaN	NaN	NaN	21.8913	NaN	22.576	NaN	NaN	NaN	NaN	NaN	NaN	NaN	NaN	NaN	NaN	NaN	NaN	NaN	21.1181	NaN	NaN	NaN	NaN	NaN	NaN	NaN	NaN	NaN	NaN
A0A1Z3MNE9	Uncharacterized protein	ASJ32_21945	OTHER	Unknown	-	-	Plasmid pAsa5	21.8658	NaN	21.2374	21.7204	22.0472	NaN	NaN	21.856	21.9346	22.5715	22.309	22.0465	NaN	NaN	NaN	23.1097	21.2833	NaN	NaN	NaN	21.8309	21.7068	21.4128	22.0471	21.6649	20.9849	NaN	NaN	21.3639	21.549	21.9215	NaN	NaN	NaN	NaN	NaN	NaN	NaN	NaN	NaN	NaN	NaN
A0A6N4CL31	L,D-transpeptidase family protein (Peptidoglycan-binding protein)	ASJ32_07915 GO994_15905	SP(Sec/SPI)	Unknown	M	L,D-transpeptidase catalytic domain	Chromosome	25.5224	25.6481	25.7049	24.0933	25.7003	25.8278	25.0956	24.7266	25.7052	25.2619	24.9154	25.1057	25.2761	24.7071	23.0895	24.4246	22.9774	21.3647	22.0029	NaN	22.6209	23.1081	22.1849	22.5452	22.2416	23.4232	23.4129	22.043	22.7525	22.1031	22.1898	22.9448	NaN	NaN	NaN	NaN	NaN	NaN	NaN	NaN	NaN	NaN
A0A6N4CL37	Uncharacterized protein	ASJ32_07965	LIPO(Sec/SPII)	Unknown	S	Bacterial protein of unknown function (DUF945)	Chromosome	20.6513	21.5212	21.5885	NaN	20.9759	NaN	NaN	NaN	NaN	NaN	NaN	NaN	NaN	NaN	NaN	NaN	26.9824	25.5083	26.496	26.4717	27.1149	26.5472	26.4774	26.1769	26.7117	26.4646	27.4706	27.394	26.693	27.0462	27.6993	26.6784	NaN	NaN	NaN	NaN	NaN	NaN	NaN	NaN	NaN	NaN
A0A6N4CL49	Helix-turn-helix domain-containing protein (XRE family transcriptional regulator)	ASJ32_08070 GO994_15235	OTHER	Unknown	K	Helix-turn-helix	Chromosome	25.7698	25.2945	26.8714	26.5041	24.5384	25.4653	25.3386	26.2855	26.7638	25.7456	27.5052	27.0228	25.8023	26.51	27.4357	26.202	24.6998	24.912	27.0302	25.8664	25.3278	25.0306	24.4401	24.9424	26.7226	25.1253	26.5017	24.6952	26.0044	25.9961	25.2821	24.3846	NaN	NaN	NaN	NaN	NaN	NaN	NaN	NaN	NaN	NaN
A0A6N4CL54	Xanthine permease XanP	ASJ32_08120 GO994_15285	OTHER	CytoplasmicMembrane	F	xanthine	Chromosome	NaN	NaN	NaN	NaN	NaN	NaN	NaN	NaN	NaN	NaN	NaN	NaN	NaN	NaN	NaN	NaN	23.2616	29.6642	24.7874	26.1935	NaN	NaN	NaN	NaN	25.1259	NaN	25.4746	22.1981	NaN	26.7902	28.3766	25.9091	NaN	NaN	NaN	NaN	NaN	NaN	NaN	NaN	NaN	NaN
A0A6N4CL72	Lysozyme inhibitor	ASJ32_08285 GO994_16680	LIPO(Sec/SPII)	Unknown	S	Membrane-bound lysozyme-inhibitor of c-type lysozyme	Chromosome	NaN	NaN	NaN	22.0544	21.3075	NaN	NaN	NaN	NaN	NaN	NaN	NaN	21.6267	19.9228	NaN	NaN	26.9474	25.4261	27.5064	27.6415	27.1657	26.6451	27.1298	26.8596	26.7497	25.936	27.2963	27.0462	26.5603	26.9699	25.152	26.6181	NaN	NaN	NaN	NaN	19.0226	NaN	18.7439	NaN	18.1112	19.1877
A0A6N4CL77	DUF3862 domain-containing protein	ASJ32_08335 GO994_16735	LIPO(Sec/SPII)	Unknown	S	lipoprotein	Chromosome	NaN	NaN	NaN	NaN	NaN	NaN	NaN	NaN	20.0722	NaN	21.1636	NaN	NaN	NaN	NaN	NaN	26.3776	24.2517	26.077	26.037	27.0798	26.0708	25.8632	25.0633	25.3048	26.2013	25.9397	26.0501	25.8803	26.5812	25.4567	26.0729	NaN	NaN	NaN	NaN	18.2189	NaN	NaN	NaN	NaN	NaN
A0A6N4CL85	Reactive intermediate/imine deaminase	ASJ32_08390	OTHER	Cytoplasmic	J	endoribonuclease L-PSP	Chromosome	NaN	NaN	NaN	NaN	20.4542	NaN	21.1974	21.14	NaN	NaN	NaN	NaN	NaN	NaN	NaN	NaN	NaN	NaN	NaN	NaN	NaN	NaN	NaN	NaN	NaN	NaN	NaN	NaN	NaN	NaN	NaN	NaN	NaN	NaN	NaN	NaN	NaN	NaN	NaN	NaN	NaN	NaN
A0A6N4CLA8	Integrase (Tyrosine-type recombinase/integrase)	ASJ32_22540 GO994_19890	OTHER	Cytoplasmic	L	Arm DNA-binding domain	Chromosome	NaN	NaN	NaN	NaN	NaN	NaN	21.3854	NaN	20.6233	NaN	NaN	21.4555	22.1452	NaN	21.8835	22.5649	22.3597	NaN	21.8749	NaN	23.1045	22.1141	22.9722	22.2437	21.1109	21.4136	21.5215	22.2802	22.5113	22.1187	22.4082	22.6532	NaN	NaN	NaN	NaN	NaN	NaN	NaN	NaN	NaN	NaN
A0A6N4CLD2	50S ribosomal protein L11	rplK ASJ32_07335 GO994_01660	OTHER	Cytoplasmic	J	Forms part of the ribosomal stalk which helps the ribosome interact with GTP-bound translation factors	Chromosome	31.1342	31.0081	30.8716	31.8572	30.4473	30.7578	30.5204	31.4261	31.2391	31.204	32.0506	32.2268	30.8651	30.9525	31.7924	31.5596	29.994	30.6772	30.3164	30.3734	29.4355	30.0491	30.3498	31.141	30.5867	30.8788	30.5776	30.793	29.7989	29.6086	30.4993	30.4341	22.9678	21.9267	22.7137	21.8282	21.3024	21.3499	21.1382	21.161	21.9407	22.8741
A0A6N4CLD5	Cytochrome c-type protein	ASJ32_07400	SP(Sec/SPI)	CytoplasmicMembrane	C	NapC/NirT cytochrome c family, N-terminal region	Chromosome	NaN	NaN	NaN	NaN	NaN	NaN	NaN	NaN	NaN	NaN	NaN	NaN	NaN	NaN	NaN	NaN	23.6448	NaN	23.1583	24.5986	21.8345	22.5169	21.8893	22.5844	24.0274	22.9264	24.9547	24.0869	NaN	NaN	21.1275	22.3299	NaN	NaN	NaN	NaN	NaN	NaN	NaN	NaN	NaN	NaN
A0A6N4CLD9	Response regulator (Response regulator GlrR)	ASJ32_07450 GO994_01540	OTHER	Cytoplasmic	T	Sigma-54 interaction domain	Chromosome	23.268	22.4043	23.2065	22.9271	25.232	22.9491	23.3291	22.9935	22.0278	22.25	22.4978	22.783	22.2178	21.76	NaN	22.7055	23.1988	22.8027	22.3875	22.5247	23.3277	23.3721	24.0578	22.9357	22.5981	23.4992	22.8062	23.0952	22.9723	22.5805	22.8049	23.3112	NaN	NaN	NaN	NaN	NaN	NaN	NaN	NaN	NaN	NaN
A0A6N4CLE1	Purine nucleoside phosphorylase	pgeF ASJ32_07500 GO994_01480	OTHER	Unknown	S	Belongs to the multicopper oxidase YfiH RL5 family	Chromosome	23.0663	23.2052	NaN	NaN	23.945	22.2796	22.4127	21.8302	22.1394	23.1471	NaN	NaN	22.3707	20.9591	NaN	21.688	NaN	NaN	NaN	NaN	NaN	NaN	NaN	NaN	NaN	NaN	NaN	NaN	NaN	NaN	NaN	NaN	NaN	NaN	NaN	NaN	NaN	NaN	NaN	NaN	NaN	NaN
A0A6N4CLE2	AraC family transcriptional regulator	ASJ32_07555	OTHER	Cytoplasmic	K	AraC-type transcriptional regulator N-terminus	Chromosome	NaN	NaN	NaN	NaN	NaN	NaN	NaN	NaN	NaN	NaN	NaN	NaN	NaN	NaN	NaN	NaN	21.3496	NaN	21.6525	22.2698	21.9405	21.3948	22.4161	22.0885	NaN	NaN	NaN	21.3209	NaN	20.7286	22.3193	22.0919	NaN	NaN	NaN	NaN	NaN	NaN	NaN	NaN	NaN	NaN
A0A6N4CLF6	Putrescine-binding periplasmic protein	ASJ32_07840 GO994_20800	SP(Sec/SPI)	Periplasmic	P	Required for the activity of the bacterial periplasmic transport system of putrescine	Chromosome	27.6166	27.7478	26.9785	26.6259	27.8977	27.7226	27.8586	27.2244	26.4595	26.9366	26.2098	26.5087	27.5464	27.2344	25.9684	27.3294	24.3825	22.8909	24.0036	24.3644	23.8898	24.5369	23.0922	23.2223	22.7689	23.7426	24.7296	23.3617	24.5689	24.3349	24.666	24.3102	NaN	NaN	NaN	NaN	NaN	NaN	NaN	NaN	NaN	NaN
A0A6N4CLG5	UDP-N-acetylglucosamine 4,6-dehydratase (Inverting)	ASJ32_07895	OTHER	Unknown	M	Polysaccharide biosynthesis protein	Chromosome	21.6393	21.404	22.909	22.6339	21.7053	20.6948	21.4612	NaN	21.6744	22.2678	23.1954	22.1193	22.1466	21.6976	22.9732	NaN	25.5777	23.8923	25.6488	25.5143	25.6943	25.3671	25.4021	24.8121	25.5999	24.9904	25.9042	25.3601	24.9895	25.1819	24.8721	25.0814	NaN	NaN	NaN	NaN	NaN	NaN	NaN	NaN	NaN	NaN
A0A6N4CLI6	Uncharacterized protein	ASJ32_21985 GO994_21975	LIPO(Sec/SPII)	Unknown	G	Modulates cellular lipopolysaccharide (LPS) levels by regulating LpxC, which is involved in lipid A biosynthesis. May act by modulating the proteolytic activity of FtsH towards LpxC. May also coordinate assembly of proteins involved in LPS synthesis at the plasma membrane	Chromosome	21.2167	21.2223	23.655	22.1932	22.5323	23.5275	21.6378	24.1153	21.1702	20.2497	22.746	21.9894	22.0668	21.5936	23.6201	21.1732	24.6078	22.0887	24.1575	25.1292	27.3582	26.7455	26.6882	27.3265	22.5483	22.0278	22.7954	23.4345	23.8841	23.9319	23.69	24.7796	NaN	NaN	NaN	NaN	NaN	NaN	NaN	NaN	NaN	NaN
A0A6N4CLJ4	ADP-ribose diphosphatase (EC 3.6.1.13) (ADP-ribose phosphohydrolase) (ADP-ribose pyrophosphatase) (Adenosine diphosphoribose pyrophosphatase)	nudF ASJ32_21865	OTHER	Cytoplasmic	L	NUDIX domain	Chromosome	NaN	NaN	NaN	NaN	NaN	NaN	NaN	NaN	NaN	NaN	NaN	NaN	NaN	NaN	NaN	NaN	NaN	NaN	NaN	NaN	NaN	NaN	NaN	NaN	NaN	NaN	NaN	NaN	NaN	NaN	NaN	NaN	NaN	NaN	NaN	NaN	NaN	NaN	NaN	NaN	NaN	NaN
A0A6N4CLJ6	Damage-inducible protein I (DinI-like family protein)	ASJ32_06655 GO994_10770	OTHER	Unknown	S	damage-inducible protein I	Chromosome	22.7474	22.8091	23.1439	24.0882	23.3088	22.6799	25.2986	23.8004	21.8758	24.597	23.2647	23.5174	21.8136	22.1065	NaN	25.1781	NaN	NaN	NaN	NaN	NaN	NaN	NaN	NaN	NaN	NaN	NaN	NaN	NaN	NaN	NaN	NaN	NaN	NaN	NaN	NaN	NaN	NaN	NaN	NaN	NaN	NaN
A0A6N4CLK5	DUF4377 domain-containing protein	ASJ32_06705 GO994_10820	LIPO(Sec/SPII)	Unknown	S	Domain of unknown function (DUF4377)	Chromosome	NaN	NaN	NaN	NaN	25.1353	24.2145	25.5346	26.603	NaN	27.1116	28.2144	27.2676	27.6998	28.0234	28.4529	NaN	27.412	25.8577	27.2811	27.7073	27.2381	27.1827	27.0441	26.3104	26.8722	26.9535	26.5308	26.3594	27.6897	26.772	25.5759	26.9132	NaN	NaN	NaN	NaN	NaN	NaN	NaN	NaN	NaN	NaN
A0A6N4CLK8	Formate C-acetyltransferase (EC 2.3.1.54)	pflB ASJ32_06760 GO994_10875	OTHER	Cytoplasmic	C	Pyruvate formate lyase-like	Chromosome	27.5539	27.7846	27.8812	27.4501	28.0823	27.454	27.9173	27.9569	27.2364	27.0728	26.7988	27.099	27.2846	27.597	26.4598	26.8218	25.823	25.2811	26.4386	25.7114	26.0884	26.6486	26.1693	26.8016	25.8447	25.9206	25.7246	25.6449	25.9646	26.0989	25.5162	25.7294	18.8881	18.1828	19.1463	18.9335	18.2517	19.0046	NaN	NaN	18.4828	19.76
A0A6N4CLN5	Serine/threonine protein kinase	ASJ32_07025	OTHER	Cytoplasmic	T	serine protein kinase	Chromosome	23.1029	22.1835	22.3967	23.0081	26.0471	25.4507	25.9378	25.2319	22.5748	21.8165	19.5672	22.5587	22.9748	22.9258	NaN	22.8942	23.3565	23.2263	23.8485	24.1927	24.4622	25.4794	25.2607	25.8492	23.4931	23.98	23.3133	23.938	23.6684	23.45	24.0181	24.0505	NaN	NaN	NaN	NaN	17.3074	NaN	16.302	17.2828	NaN	16.2728
A0A6N4CLP8	Uncharacterized protein	ASJ32_07180 GO994_11150	OTHER	Cytoplasmic	-	-	Chromosome	24.3064	25.378	23.847	24.221	26.1691	24.9222	25.9468	24.8593	24.5047	24.8583	23.6434	24.8084	24.9814	21.5649	NaN	24.2806	22.4904	NaN	NaN	NaN	21.3032	21.9728	21.906	22.6067	NaN	22.2228	NaN	NaN	22.0249	NaN	22.05	23.0031	NaN	NaN	NaN	NaN	NaN	NaN	NaN	NaN	NaN	NaN
A0A6N4CLQ7	UPF0502 protein ASJ32_21790	ASJ32_21790 GO994_15075	OTHER	Cytoplasmic	S	Belongs to the UPF0502 family	Chromosome	27.1174	27.1018	27.6438	27.1723	27.2982	27.6544	27.5235	27.3423	26.2033	26.5489	25.844	26.5943	27.1091	26.238	25.9336	26.9957	23.5459	24.9013	24.1571	22.9011	22.6105	24.1823	24.0876	24.1578	22.9505	22.3793	22.6735	21.9689	24.234	23.4669	22.2649	23.9013	NaN	NaN	NaN	NaN	NaN	NaN	NaN	NaN	NaN	NaN
A0A6N4CLS0	LysR family transcriptional regulator	ASJ32_21615 GO994_00360	OTHER	Cytoplasmic	K	LysR substrate binding domain	Chromosome	NaN	NaN	NaN	NaN	NaN	NaN	NaN	NaN	NaN	NaN	NaN	NaN	NaN	NaN	NaN	NaN	NaN	NaN	NaN	NaN	22.4747	22.8948	22.1278	NaN	NaN	NaN	NaN	NaN	NaN	NaN	NaN	NaN	NaN	NaN	NaN	NaN	NaN	NaN	NaN	NaN	NaN	NaN
A0A6N4CLS6	Histidine kinase (EC 2.7.13.3)	ASJ32_21650	OTHER	CytoplasmicMembrane	T	Histidine kinase	Chromosome	NaN	NaN	NaN	NaN	NaN	NaN	NaN	NaN	NaN	NaN	NaN	NaN	NaN	NaN	NaN	NaN	20.6814	NaN	21.9132	21.5564	NaN	NaN	NaN	NaN	21.8351	NaN	21.3951	21.2251	21.1618	NaN	NaN	21.925	NaN	NaN	NaN	NaN	NaN	NaN	NaN	NaN	NaN	NaN
A0A6N4CLT7	High frequency lysogenization protein HflD homolog	hflD ASJ32_21505	OTHER	Unknown	S	High frequency lysogenization protein HflD homolog	Chromosome	22.3683	22.4384	23.1168	22.5749	22.0322	NaN	NaN	21.2899	23.0659	21.5751	24.058	21.8727	22.4902	23.0947	22.7862	NaN	26.2547	NaN	25.9631	25.7926	26.0122	25.324	25.6039	25.1948	26.3993	25.471	26.0166	25.2114	25.4461	25.9549	25.39	25.5095	NaN	NaN	NaN	NaN	NaN	NaN	NaN	NaN	NaN	17.2857
A0A6N4CLW3	Lipopolysaccharide assembly protein B	lapB ASJ32_21125 GO994_13855	OTHER	Cytoplasmic	G	Modulates cellular lipopolysaccharide (LPS) levels by regulating LpxC, which is involved in lipid A biosynthesis. May act by modulating the proteolytic activity of FtsH towards LpxC. May also coordinate assembly of proteins involved in LPS synthesis at the plasma membrane	Chromosome	NaN	NaN	NaN	NaN	NaN	NaN	NaN	NaN	NaN	NaN	NaN	NaN	NaN	NaN	NaN	NaN	24.3199	25.1322	24.015	24.8697	24.7082	23.0002	23.9278	23.766	24.947	24.2282	24.7381	24.8975	23.7687	24.1996	25.3608	24.7108	NaN	NaN	NaN	NaN	NaN	NaN	NaN	NaN	NaN	NaN
A0A6N4CLX1	DNA repair protein	ASJ32_21175 GO994_13905	OTHER	Cytoplasmic	-	-	Chromosome	NaN	NaN	NaN	NaN	NaN	NaN	NaN	NaN	NaN	NaN	NaN	NaN	NaN	NaN	NaN	NaN	25.3154	24.5583	25.7684	25.8951	25.4321	24.528	25.1234	24.8339	26.3926	25.0873	26.3351	24.6996	24.4936	25.1297	26.2792	25.1361	NaN	NaN	NaN	NaN	NaN	NaN	NaN	NaN	NaN	NaN
A0A6N4CLY4	Uncharacterized protein	ASJ32_06075	OTHER	Unknown	-	-	Chromosome	NaN	NaN	NaN	NaN	NaN	NaN	NaN	NaN	NaN	NaN	NaN	NaN	NaN	NaN	NaN	NaN	24.3855	NaN	24.591	24.1933	26.0015	25.2888	24.9632	24.3207	23.8007	NaN	23.2137	23.5615	22.0366	23.8296	23.9956	23.2157	NaN	19.5653	NaN	NaN	NaN	NaN	NaN	NaN	NaN	NaN
A0A6N4CM06	Cell shape-determining protein MreB	mreB ASJ32_06290 GO994_02860	OTHER	Cytoplasmic	D	Rod shape-determining protein MreB	Chromosome	25.2844	25.0664	24.7609	25.5312	25.2892	24.9325	25.0263	25.0254	24.538	25.4092	25.4618	25.8474	25.6996	24.8777	25.8245	26.1965	29.2964	29.4729	29.0013	29.5052	29.1628	28.9175	29.1559	28.8425	29.1662	29.1709	28.9915	29.1596	29.0973	28.6894	29.1205	29.1695	22.2927	21.8478	22.4157	22.7582	22.1325	20.9715	22.1311	22.484	22.549	22.1131
A0A6N4CM13	MSHA biogenesis protein MshI	ASJ32_06340 GO994_02905	OTHER	Unknown	NU	Pilus assembly protein	Chromosome	NaN	NaN	NaN	NaN	NaN	NaN	NaN	NaN	NaN	NaN	NaN	NaN	NaN	NaN	NaN	NaN	23.5388	NaN	22.7966	22.9309	22.8651	23.237	23.0059	NaN	23.0991	23.7722	23.5732	22.9537	22.6828	22.711	23.7531	23.2355	NaN	NaN	NaN	NaN	NaN	NaN	NaN	NaN	NaN	NaN
A0A6N4CM19	Carbonic anhydrase (EC 4.2.1.1) (Carbonate dehydratase)	ASJ32_06390 GO994_02955	OTHER	Cytoplasmic	P	Reversible hydration of carbon dioxide	Chromosome	22.9009	22.0656	NaN	NaN	22.2401	NaN	23.0807	NaN	23.1996	22.1332	NaN	NaN	23.4994	23.4048	NaN	NaN	24.6203	NaN	24.1475	NaN	23.9632	23.8035	23.8615	23.1999	23.0572	22.3073	24.0195	NaN	24.6488	24.2498	NaN	23.6835	NaN	NaN	NaN	NaN	NaN	NaN	NaN	NaN	NaN	NaN
A0A6N4CM24	Phospholipase	ASJ32_06440 GO994_03010	OTHER	CytoplasmicMembrane	I	COG1502 Phosphatidylserine phosphatidylglycerophosphate cardiolipi n synthases and related enzymes	Chromosome	NaN	NaN	NaN	NaN	NaN	NaN	NaN	NaN	NaN	NaN	NaN	NaN	NaN	NaN	NaN	NaN	22.4765	NaN	21.9755	22.4833	22.6627	22.0086	21.6365	20.9995	22.1202	21.7709	22.6322	NaN	NaN	20.9792	NaN	22.4764	NaN	NaN	NaN	NaN	NaN	NaN	NaN	NaN	NaN	NaN
A0A6N4CM39	Uncharacterized protein	ASJ32_06625	SP(Sec/SPI)	Periplasmic	-	-	Chromosome	23.4822	22.6025	22.9482	22.366	23.1512	21.4926	23.773	23.0056	21.625	22.8048	NaN	NaN	24.0229	22.5417	20.9427	23.2536	NaN	NaN	NaN	NaN	NaN	NaN	NaN	NaN	NaN	NaN	NaN	NaN	NaN	NaN	NaN	NaN	NaN	NaN	NaN	NaN	NaN	NaN	NaN	NaN	NaN	NaN
A0A6N4CM45	Beta-N-acetylhexosaminidase (EC 3.2.1.52) (N-acetyl-beta-glucosaminidase)	ASJ32_21030	SP(Sec/SPI)	OuterMembrane	G	COG3525 N-acetyl-beta-hexosaminidase	Chromosome	NaN	NaN	NaN	20.5506	NaN	20.022	19.7532	19.7656	NaN	NaN	NaN	NaN	NaN	NaN	NaN	NaN	22.976	22.8526	22.22	22.9676	23.1166	23.7517	24.5881	23.7397	22.0691	22.0839	22.2532	22.295	20.2007	20.0609	21.9313	22.264	NaN	NaN	NaN	NaN	NaN	NaN	NaN	NaN	NaN	NaN
A0A6N4CM52	Alkyl hydroperoxide reductase C (Peroxiredoxin) (Thioredoxin peroxidase)	ASJ32_21080	OTHER	Cytoplasmic	O	Alkyl hydroperoxide reductase	Chromosome	24.6306	24.8223	24.3858	23.6293	24.4901	23.3955	25.2075	24.807	24.0814	23.2512	23.9314	23.8898	23.879	24.3557	22.576	23.5013	20.7312	NaN	NaN	NaN	NaN	NaN	NaN	NaN	20.4993	NaN	NaN	NaN	NaN	NaN	NaN	NaN	NaN	NaN	NaN	NaN	NaN	NaN	NaN	NaN	NaN	NaN
A0A6N4CM57	Threonylcarbamoyl-AMP synthase	ASJ32_20980 GO994_15840	OTHER	Cytoplasmic	J	Belongs to the SUA5 family	Chromosome	23.9989	23.6271	23.4383	23.0378	24.447	24.3807	24.6875	23.7328	23.9305	25.0013	23.208	24.1385	23.8954	20.6909	NaN	23.5112	23.0715	24.0183	22.0416	NaN	22.9621	22.7093	21.972	22.9261	23.8975	23.5877	22.5189	23.3119	22.094	21.5142	21.8492	22.9984	NaN	NaN	NaN	NaN	NaN	NaN	NaN	NaN	NaN	NaN
A0A6N4CM67	Flavodoxin	fldB ASJ32_20885 GO994_05395	OTHER	Cytoplasmic	C	Low-potential electron donor to a number of redox enzymes	Chromosome	NaN	21.9527	NaN	NaN	22.679	NaN	NaN	NaN	21.6919	21.1682	NaN	NaN	22.1275	NaN	NaN	NaN	NaN	NaN	21.2968	NaN	21.9053	NaN	NaN	NaN	NaN	NaN	NaN	NaN	22.3503	NaN	NaN	NaN	NaN	NaN	NaN	NaN	NaN	NaN	NaN	NaN	NaN	NaN
A0A6N4CM73	tRNA-dihydrouridine synthase B (EC 1.3.1.-)	dusB ASJ32_20730 GO994_04225	OTHER	Cytoplasmic	H	Catalyzes the synthesis of 5,6-dihydrouridine (D), a modified base found in the D-loop of most tRNAs, via the reduction of the C5-C6 double bond in target uridines	Chromosome	21.9581	22.0573	21.8574	22.6903	21.4884	21.9045	22.3891	21.9835	21.9838	22.0792	20.0802	20.9803	22.3769	21.1188	NaN	22.3477	25.1893	25.304	24.4977	26.0787	25.1996	25.0073	25.4703	25.1357	25.168	26.2135	24.665	25.7318	24.7011	24.5977	23.9423	25.7306	17.8259	17.7625	NaN	18.16	17.5339	NaN	NaN	NaN	17.7641	17.8757
A0A6N4CM84	Peptidase A2 domain-containing protein	ASJ32_20625 GO994_03585	LIPO(Sec/SPII)	Periplasmic	S	gag-polyprotein putative aspartyl protease	Chromosome	NaN	NaN	NaN	NaN	NaN	NaN	NaN	NaN	NaN	NaN	NaN	NaN	NaN	NaN	NaN	NaN	23.6456	22.333	23.5768	23.1572	23.7078	23.8617	23.6936	23.4086	22.9983	23.3545	24.0755	22.1139	23.5152	23.6352	23.4273	23.2638	NaN	NaN	NaN	NaN	NaN	NaN	NaN	NaN	NaN	NaN
A0A6N4CM91	NfeD family protein	ASJ32_20675 GO994_03640	OTHER	CytoplasmicMembrane	OU	NfeD-like C-terminal, partner-binding	Chromosome	NaN	NaN	NaN	NaN	NaN	NaN	NaN	NaN	NaN	NaN	NaN	NaN	NaN	NaN	NaN	NaN	25.5715	25.1571	25.0165	25.5796	25.5882	25.51	24.6914	25.1146	24.7219	24.7791	25.4494	25.2473	24.7502	24.7615	26.4575	24.9646	20.3279	20.8626	21.4464	21.0973	19.2013	19.985	20.372	21.4111	19.1596	20.8404
A0A6N4CM94	Uncharacterized protein	ASJ32_20510	OTHER	Unknown	S	Protein of unknown function (DUF1349)	Chromosome	21.6247	22.3357	22.5619	20.4875	23.063	22.9388	23.713	23.1146	21.5306	22.663	NaN	21.138	21.7764	21.3155	20.9373	21.844	20.834	NaN	NaN	20.8126	21.3916	NaN	21.0603	NaN	NaN	NaN	NaN	NaN	NaN	NaN	NaN	21.3087	NaN	NaN	NaN	NaN	NaN	NaN	NaN	NaN	NaN	NaN
A0A6N4CMA2	NAD-dependent succinate-semialdehyde dehydrogenase (EC 1.2.1.16)	gabD ASJ32_20560	OTHER	Cytoplasmic	C	Belongs to the aldehyde dehydrogenase family	Chromosome	24.2407	24.6329	25.9238	25.1234	24.0477	24.0829	24.8066	25.525	24.5866	24.5263	24.8086	24.7073	25.4876	25.4594	25.5709	25.0331	21.6123	23.4676	22.4824	22.6078	21.9782	NaN	21.6695	23.1965	22.09	NaN	22.0651	NaN	22.6141	23.3608	NaN	22.72	NaN	NaN	NaN	NaN	NaN	NaN	NaN	NaN	NaN	NaN
A0A6N4CMF0	Ion-translocating oxidoreductase complex subunit C (EC 7.-.-.-) (Rnf electron transport complex subunit C)	rnfC ASJ32_20090	OTHER	Cytoplasmic	C	Part of a membrane complex involved in electron transport	Chromosome	23.7063	23.5594	23.775	24.3813	23.5171	23.688	23.8026	24.425	23.9389	23.988	24.5941	24.3346	23.7069	23.4613	24.2482	24.6241	24.9691	25.6276	24.7551	25.8411	25.6568	25.0878	25.4745	25.6118	25.198	25.2361	25.0439	25.5952	24.7242	25.0812	25.0963	25.3541	NaN	20.9625	21.2376	21.0794	20.187	21.0267	NaN	20.9308	NaN	20.5164
A0A6N4CMF1	S-protein secretion protein E (Type II/IV secretion system protein)	ASJ32_19880 GO994_15760	OTHER	Cytoplasmic	NU	Type II/IV secretion system protein	Chromosome	24.3483	NaN	25.6114	22.2537	24.071	22.5174	22.6756	NaN	23.9986	24.1675	25.7705	23.8303	22.7889	24.3015	24.344	22.3278	26.523	25.5402	26.3996	26.3342	26.6082	25.7534	25.9959	25.3221	26.8918	26.3789	27.1118	26.2108	26.3498	25.9971	26.4548	26.301	NaN	NaN	17.3614	19.1842	18.5966	16.5303	17.8871	19.0384	17.7391	17.8437
A0A6N4CMF2	Acyltransferase	ASJ32_19935	OTHER	CytoplasmicMembrane	I	Acyltransferases	Chromosome	NaN	NaN	NaN	NaN	NaN	NaN	NaN	NaN	NaN	NaN	NaN	NaN	NaN	NaN	NaN	NaN	NaN	NaN	NaN	NaN	22.3681	22.6789	NaN	NaN	NaN	23.4741	NaN	23.1892	NaN	NaN	NaN	NaN	NaN	NaN	NaN	NaN	NaN	NaN	NaN	NaN	NaN	NaN
A0A6N4CMG2	Uncharacterized protein	ASJ32_05190	OTHER	Cytoplasmic	S	Protein of unknown function, DUF484	Chromosome	23.7033	22.0702	NaN	22.7198	24.2399	NaN	20.7229	21.3671	NaN	NaN	NaN	NaN	21.4638	21.3205	NaN	22.3091	25.0929	25.0264	24.6955	24.2019	25.4199	25.2237	25.6449	25.2415	23.9208	24.7125	22.9231	23.9838	24.9134	24.1943	23.9192	25.6461	NaN	NaN	NaN	NaN	NaN	NaN	NaN	NaN	NaN	NaN
A0A6N4CMG9	Glycosidase	ASJ32_05290 GO994_19375	LIPO(Sec/SPII)	Cytoplasmic	G	Alpha amylase, catalytic domain	Chromosome	NaN	NaN	NaN	NaN	NaN	NaN	NaN	NaN	NaN	NaN	NaN	NaN	NaN	NaN	NaN	NaN	21.696	22.5729	NaN	23.1233	22.5517	22.7308	22.5141	23.1072	21.4456	21.4695	21.3277	21.8929	21.5549	21.6478	22.888	22.8172	NaN	NaN	NaN	NaN	NaN	NaN	NaN	NaN	NaN	NaN
A0A6N4CMH5	ABC transporter substrate-binding protein	ASJ32_05350	OTHER	CytoplasmicMembrane	K	Activates the small RNA gene sgrS under glucose- phosphate stress conditions as well as yfdZ. Represses its own transcription under both stress and non-stress conditions. Might act as a sensor of the intracellular accumulation of phosphoglucose by binding these molecules in its C-terminal solute-binding domain	Chromosome	NaN	NaN	NaN	NaN	NaN	NaN	NaN	NaN	NaN	NaN	NaN	NaN	NaN	NaN	NaN	NaN	24.6209	NaN	NaN	NaN	25.6993	23.7219	23.4564	NaN	NaN	NaN	NaN	NaN	NaN	NaN	24.2689	25.7353	NaN	NaN	NaN	NaN	NaN	NaN	NaN	NaN	NaN	NaN
A0A6N4CMH8	Holin	ASJ32_08535 ASJ32_22790	OTHER	CytoplasmicMembrane	S	Phage holin family (Lysis protein S)	Chromosome	NaN	NaN	NaN	NaN	NaN	NaN	NaN	NaN	NaN	NaN	NaN	NaN	NaN	NaN	NaN	NaN	NaN	NaN	NaN	NaN	NaN	NaN	NaN	NaN	NaN	NaN	NaN	NaN	NaN	NaN	NaN	NaN	NaN	NaN	NaN	NaN	NaN	NaN	NaN	NaN	NaN	NaN
A0A6N4CMJ4	Sodium:proton exchanger	ASJ32_05555	OTHER	CytoplasmicMembrane	P	Belongs to the monovalent cation proton antiporter 2 (CPA2) transporter (TC 2.A.37) family	Chromosome	NaN	NaN	NaN	NaN	NaN	NaN	NaN	NaN	NaN	NaN	NaN	NaN	NaN	NaN	NaN	NaN	24.1901	24.7897	22.1758	24.5226	24.1282	24.1376	22.7803	24.7716	23.5898	22.7205	23.6927	NaN	NaN	NaN	23.2415	23.8414	NaN	NaN	NaN	NaN	NaN	NaN	NaN	NaN	NaN	NaN
A0A6N4CMK3	Type II secretion system protein GspC	ASJ32_05655	OTHER	CytoplasmicMembrane	U	General secretion pathway protein C	Chromosome	NaN	NaN	NaN	NaN	NaN	NaN	NaN	NaN	NaN	NaN	NaN	NaN	NaN	NaN	NaN	NaN	25.2318	25.5618	25.0213	25.8322	25.2944	25.1491	24.996	25.1101	24.8676	24.892	25.532	25.4602	24.5869	25.4439	25.0723	25.4022	NaN	NaN	NaN	NaN	NaN	NaN	NaN	NaN	NaN	NaN
A0A6N4CML0	General secretion pathway protein N (Type II secretion system protein N)	ASJ32_05710	OTHER	CytoplasmicMembrane	S	Type II secretion system (T2SS), protein N	Chromosome	NaN	NaN	NaN	NaN	NaN	NaN	NaN	NaN	NaN	NaN	NaN	NaN	NaN	NaN	NaN	NaN	24.4718	NaN	24.7261	22.8599	24.6539	23.2005	23.187	NaN	25.0627	23.3226	24.9985	23.8803	23.7425	24.7796	23.6644	23.5578	NaN	NaN	NaN	NaN	NaN	NaN	NaN	NaN	NaN	NaN
A0A6N4CML3	Bifunctional aspartokinase/homoserine dehydrogenase [Includes: Aspartokinase (EC 2.7.2.4); Homoserine dehydrogenase (EC 1.1.1.3)]	ASJ32_05765	OTHER	CytoplasmicMembrane	E	homoserine dehydrogenase	Chromosome	22.277	20.8166	22.1908	23.4589	22.4345	21.1087	22.013	NaN	20.7564	20.6996	21.2733	22.3627	23.6441	22.822	23.8264	24.5333	27.5673	28.0372	26.8682	28.1413	27.6103	26.8208	27.0817	26.6935	26.1373	26.6573	26.5455	26.8818	27.3763	27.3045	28.1566	28.3574	20.6389	20.0558	20.3856	20.7656	21.0083	18.4223	19.5056	20.2595	19.2769	18.7639
A0A6N4CMM1	Cys-tRNA(Pro)/Cys-tRNA(Cys) deacylase (EC 4.2.-.-)	ybaK ASJ32_05820 GO994_19995	OTHER	Cytoplasmic	S	Belongs to the prolyl-tRNA editing family. YbaK EbsC subfamily	Chromosome	22.5331	NaN	NaN	NaN	24.794	24.6469	23.5683	23.3456	22.039	23.4778	NaN	NaN	NaN	NaN	NaN	22.8504	NaN	NaN	NaN	NaN	NaN	NaN	NaN	NaN	NaN	NaN	NaN	NaN	NaN	NaN	NaN	NaN	NaN	NaN	NaN	NaN	NaN	NaN	NaN	NaN	NaN	NaN
A0A6N4CMN6	Phage tail protein	ASJ32_05955	OTHER	Extracellular	S	Phage tail-collar fibre protein	Chromosome	NaN	NaN	20.9339	20.6987	NaN	NaN	NaN	NaN	NaN	NaN	NaN	NaN	NaN	NaN	NaN	NaN	24.3317	NaN	24.5724	25.0565	24.0926	22.6995	23.6511	23.5901	24.4035	24.3651	24.7283	24.8296	23.6905	24.196	25.2221	25.5425	NaN	NaN	15.9945	NaN	NaN	NaN	NaN	NaN	NaN	NaN
A0A6N4CMP8	Aspartate ammonia-lyase (Aspartase) (EC 4.3.1.1)	aspA ASJ32_19800 GO994_04145	OTHER	Cytoplasmic	E	Aspartate ammonia-lyase	Chromosome	24.537	24.637	25.5939	24.6013	24.8865	25.4627	25.2106	25.5854	25.0015	24.8222	24.7238	24.8831	24.5905	24.9779	24.5743	24.5246	21.3736	NaN	21.8552	NaN	22.1096	22.3543	21.201	22.2863	21.8546	22.0035	22.1439	21.5145	22.285	23.1216	NaN	NaN	NaN	NaN	NaN	NaN	NaN	NaN	NaN	NaN	NaN	NaN
A0A6N4CMQ0	Uncharacterized protein	ASJ32_19760	LIPO(Sec/SPII)	Unknown	-	-	Chromosome	24.1272	23.173	24.7222	24.6384	23.5355	23.8337	22.3677	22.4705	22.4483	24.5919	24.08	23.7659	22.644	26.614	25.0268	24.146	28.9214	29.7274	31.6162	29.6697	28.4086	27.089	28.0097	27.6634	29.4917	27.7625	28.5687	28.8725	30.3638	29.3691	28.4672	28.2348	22.8555	22.2107	22.1447	21.8218	21.0348	20.3532	20.9915	20.9571	23.926	23.2614
A0A6N4CMQ4	UDP-2,3-diacylglucosamine hydrolase (EC 3.6.1.54) (UDP-2,3-diacylglucosamine diphosphatase)	lpxH ASJ32_09305 GO994_14590	OTHER	Cytoplasmic	S	Hydrolyzes the pyrophosphate bond of UDP-2,3- diacylglucosamine to yield 2,3-diacylglucosamine 1-phosphate (lipid X) and UMP by catalyzing the attack of water at the alpha-P atom. Involved in the biosynthesis of lipid A, a phosphorylated glycolipid that anchors the lipopolysaccharide to the outer membrane of the cell	Chromosome	NaN	NaN	NaN	NaN	NaN	NaN	NaN	NaN	NaN	26.2735	25.6919	NaN	NaN	NaN	NaN	NaN	24.2286	NaN	23.3859	25.0785	24.3011	23.2244	24.741	24.3679	24.1842	25.2573	24.8982	25.6105	24.2289	24.0019	25.2172	25.0515	NaN	NaN	NaN	NaN	NaN	NaN	NaN	NaN	NaN	NaN
A0A6N4CMR2	Cysteine--tRNA ligase (EC 6.1.1.16) (Cysteinyl-tRNA synthetase) (CysRS)	cysS ASJ32_09320 GO994_14575	OTHER	Cytoplasmic	J	Belongs to the class-I aminoacyl-tRNA synthetase family	Chromosome	26.0097	25.6906	25.9391	25.501	26.4613	25.9597	26.3342	25.895	25.4814	26.2177	25.2585	25.5367	25.9749	25.7942	24.5511	25.9867	25.4522	25.8753	25.4795	25.345	25.4643	25.709	26.271	26.146	25.4334	25.6373	25.1001	25.4959	25.8827	25.2797	25.7701	26.0388	NaN	18.9706	17.5412	17.4867	NaN	NaN	18.5169	NaN	NaN	18.8681
A0A6N4CMS1	Sulfurtransferase (EC 2.8.1.-)	tusE ASJ32_19410 GO994_13455	OTHER	Cytoplasmic	P	Part of a sulfur-relay system	Chromosome	20.8603	20.5824	NaN	21.4038	21.1034	20.9915	21.3221	21.1786	NaN	21.8053	NaN	NaN	21.0587	NaN	NaN	NaN	NaN	NaN	NaN	NaN	NaN	NaN	NaN	NaN	NaN	NaN	NaN	NaN	NaN	NaN	NaN	NaN	NaN	NaN	NaN	NaN	NaN	NaN	NaN	NaN	NaN	NaN
A0A6N4CMS5	Peptidase P60	ASJ32_07935	OTHER	Unknown	M	NlpC/P60 family	Chromosome	NaN	NaN	NaN	NaN	NaN	NaN	NaN	NaN	NaN	NaN	NaN	NaN	NaN	NaN	NaN	NaN	20.3868	NaN	NaN	NaN	NaN	NaN	NaN	NaN	NaN	NaN	NaN	20.5417	NaN	NaN	NaN	NaN	NaN	NaN	NaN	NaN	NaN	NaN	NaN	NaN	NaN	NaN
A0A6N4CMS9	Peptidase M23 (Peptidoglycan DD-metalloendopeptidase family protein)	ASJ32_07985 GO994_15975	SP(Sec/SPI)	OuterMembrane	M	COG0739 Membrane proteins related to metalloendopeptidases	Chromosome	NaN	NaN	NaN	NaN	NaN	NaN	NaN	NaN	NaN	NaN	NaN	NaN	NaN	NaN	NaN	NaN	NaN	NaN	NaN	NaN	22.102	24.5863	25.5881	24.0381	NaN	NaN	NaN	NaN	NaN	NaN	NaN	NaN	NaN	NaN	NaN	NaN	NaN	NaN	NaN	NaN	NaN	NaN
A0A6N4CMT4	UPF0313 protein ASJ32_08035	ASJ32_08035	OTHER	Cytoplasmic	C	Domain of unknown function (DUF3362)	Chromosome	23.4504	22.2452	22.4675	23.3386	22.1632	20.1888	20.0943	NaN	23.376	22.5288	24.1902	23.2767	23.4203	22.8188	23.5186	22.5553	25.8021	24.9696	25.1976	25.4546	22.8215	21.0501	22.5504	21.9485	25.6454	25.077	25.2667	25.3952	25.033	25.1198	25.2454	24.9922	19.4168	20.992	20.3906	21.1167	15.2681	NaN	NaN	NaN	20.0114	21.1918
A0A6N4CMT8	Exonuclease SbcC	ASJ32_19185	OTHER	Cytoplasmic	L	Putative exonuclease SbcCD, C subunit	Chromosome	24.7358	23.5563	24.6918	25.7812	25.673	25.0341	25.0559	24.8412	23.85	22.783	24.0522	24.4803	24.6884	24.8236	24.9452	25.5195	26.3937	26.2286	26.0772	26.578	26.3701	26.6747	27.0474	26.8198	26.124	26.272	25.9343	26.4259	26.251	26.278	26.81	26.9609	17.8745	17.7706	17.7039	17.5685	17.4465	15.8296	17.0995	18.5064	NaN	17.9005
A0A6N4CMU1	OmpA family protein	ASJ32_08090 GO994_15255	SP(Sec/SPI)	OuterMembrane	M	Belongs to the ompA family	Chromosome	NaN	NaN	NaN	NaN	NaN	NaN	NaN	NaN	NaN	NaN	NaN	NaN	NaN	NaN	NaN	NaN	NaN	NaN	NaN	21.1956	21.7239	21.5344	21.9652	21.3125	NaN	NaN	NaN	NaN	NaN	NaN	NaN	NaN	19.6567	19.7749	19.6586	19.3987	20.1757	20.5164	19.8556	20.8682	19.6803	19.6875
A0A6N4CMV8	50S ribosomal protein L33	rpmG ASJ32_18970 GO994_00465	OTHER	Cytoplasmic	J	Belongs to the bacterial ribosomal protein bL33 family	Chromosome	NaN	NaN	21.9902	25.1189	20.2166	NaN	NaN	NaN	22.2978	NaN	28.4624	27.6636	20.3599	20.1075	28.7229	27.1705	23.9257	23.5193	22.6288	26.161	24.6475	NaN	26.2117	23.7797	23.8019	23.6333	25.0959	25.9013	24.7317	23.5602	26.1398	26.5255	NaN	NaN	NaN	NaN	NaN	NaN	NaN	NaN	NaN	NaN
A0A6N4CMW0	Histidine kinase (EC 2.7.13.3)	ASJ32_08250 GO994_15455	OTHER	CytoplasmicMembrane	T	Signal transduction histidine kinase regulating citrate malate metabolism	Chromosome	NaN	NaN	NaN	NaN	NaN	NaN	NaN	NaN	NaN	NaN	NaN	NaN	NaN	NaN	NaN	NaN	23.0169	NaN	23.8794	23.4702	24.9719	23.894	22.2454	NaN	23.9908	NaN	24.5122	23.6203	23.5072	23.9623	NaN	23.6686	NaN	NaN	NaN	NaN	NaN	NaN	NaN	NaN	NaN	NaN
A0A6N4CMX0	tRNA (cytidine(34)-2'-O)-methyltransferase (EC 2.1.1.207) (tRNA (cytidine/uridine-2'-O-)-methyltransferase TrmL)	trmL ASJ32_19085	OTHER	Unknown	J	Methylates the ribose at the nucleotide 34 wobble position in the two leucyl isoacceptors tRNA(Leu)(CmAA) and tRNA(Leu)(cmnm5UmAA). Catalyzes the methyl transfer from S- adenosyl-L-methionine to the 2'-OH of the wobble nucleotide	Chromosome	24.2055	23.6412	23.066	23.0976	24.4536	24.7734	23.9741	23.9585	23.8433	24.7576	23.481	25.1949	23.1286	22.6748	22.645	23.3817	NaN	NaN	NaN	NaN	NaN	NaN	NaN	NaN	NaN	NaN	NaN	NaN	NaN	NaN	NaN	NaN	NaN	NaN	NaN	NaN	NaN	NaN	NaN	NaN	NaN	NaN
A0A6N4CMX4	Bactoprenol glucosyl transferase (Glycosyltransferase)	ASJ32_08360 GO994_16765	OTHER	CytoplasmicMembrane	M	Glycosyltransferase like family 2	Chromosome	NaN	NaN	NaN	NaN	NaN	NaN	NaN	NaN	NaN	NaN	NaN	NaN	NaN	NaN	NaN	NaN	26.9025	25.5079	26.7125	26.2	26.4521	26.0531	25.5012	25.0435	26.9694	26.1086	27.1104	25.9545	26.34	26.3766	27.0138	26.3947	NaN	NaN	NaN	NaN	NaN	NaN	NaN	NaN	NaN	NaN
A0A6N4CMZ7	Uroporphyrinogen decarboxylase (UPD) (URO-D) (EC 4.1.1.37)	hemE ASJ32_18545	OTHER	Cytoplasmic	H	Catalyzes the decarboxylation of four acetate groups of uroporphyrinogen-III to yield coproporphyrinogen-III	Chromosome	24.2976	25.0174	24.5028	24.3903	25.176	25.4592	24.8073	25.2382	23.8926	25.2295	23.9626	24.8032	24.5383	23.6701	22.9793	24.7843	23.4497	NaN	24.1769	NaN	NaN	23.7584	NaN	NaN	24.7109	NaN	23.6573	NaN	25.087	24.9446	NaN	24.9358	NaN	NaN	NaN	NaN	NaN	NaN	NaN	NaN	NaN	NaN
A0A6N4CMZ9	3-methyl-2-oxobutanoate hydroxymethyltransferase (EC 2.1.2.11) (Ketopantoate hydroxymethyltransferase) (KPHMT)	panB ASJ32_18595 GO994_17805	OTHER	Unknown	H	Catalyzes the reversible reaction in which hydroxymethyl group from 5,10-methylenetetrahydrofolate is transferred onto alpha-ketoisovalerate to form ketopantoate	Chromosome	27.1904	27.9205	27.7087	27.0833	27.3926	27.6735	27.1188	27.2487	27.7854	27.0876	28.015	27.2228	27.7509	28.2755	28.2162	27.0316	25.7435	24.7109	25.8862	25.5502	25.9053	25.9446	26.0109	26.1241	26.6962	26.0379	26.2543	25.7154	26.2372	26.5068	24.8531	25.7041	NaN	18.4669	NaN	18.8116	16.9102	NaN	NaN	NaN	NaN	17.8582
A0A6N4CN11	NAD(+) diphosphatase (EC 3.6.1.22)	nudC ASJ32_18540	OTHER	Cytoplasmic	L	NADH pyrophosphatase zinc ribbon domain	Chromosome	22.3291	21.2571	22.8606	21.6158	23.2795	23.2114	22.7547	22.834	21.0828	22.6278	NaN	22.8804	22.0841	21.5815	22.4976	22.9403	23.0054	24.1595	21.4136	22.8704	23.7564	23.531	23.9219	23.6967	21.2347	21.9634	21.8816	22.5533	22.578	22.0122	23.3373	23.0429	NaN	NaN	NaN	NaN	NaN	NaN	NaN	NaN	17.5679	NaN
A0A6N4CN12	Uncharacterized protein	ASJ32_07305	OTHER	Cytoplasmic	S	YheO-like PAS domain	Chromosome	25.7493	24.9374	24.8324	26.2702	26.2635	25.8266	25.7625	25.3102	25.4499	25.1776	24.727	24.6479	25.5616	26.0035	25.3123	25.1299	26.359	26.3896	26.3499	25.6812	26.4328	27.4482	27.6028	27.2853	26.0852	27.1929	25.9223	26.9875	26.8452	26.4313	26.6218	26.7161	NaN	NaN	NaN	NaN	NaN	NaN	NaN	NaN	NaN	NaN
A0A6N4CN14	Acyltransferase	ASJ32_18225	OTHER	Cytoplasmic	I	Phosphate acyltransferases	Chromosome	22.42	22.6888	22.7177	22.9593	22.6701	21.9509	NaN	21.979	22.3855	21.7541	22.6904	23.1068	22.0375	22.5111	22.9291	NaN	26.232	26.8643	26.3958	27.0021	26.0336	25.5886	25.7818	26.1564	26.6324	26.529	27.087	26.9974	26.0128	26.2037	26.5795	26.4631	NaN	18.4817	NaN	NaN	17.6615	16.2734	17.7398	NaN	18.2421	17.9062
A0A6N4CN23	Response regulator (Two-component system response regulator)	ASJ32_07420 GO994_01575	OTHER	Cytoplasmic	KT	Transcriptional regulatory protein, C terminal	Chromosome	23.356	23.2191	22.72	23.3987	25.3102	24.6314	24.1442	24.0266	22.7649	23.5442	22.2265	23.1162	23.3119	22.4545	21.9951	23.5221	23.8584	23.0832	23.4257	23.4299	23.7706	25.092	25.4572	24.4009	22.4743	25.0096	23.665	24.2133	24.1362	22.4505	23.6538	24.721	NaN	NaN	NaN	NaN	NaN	NaN	NaN	NaN	NaN	NaN
A0A6N4CN35	UPF0597 protein ASJ32_07525	ASJ32_07525	OTHER	Cytoplasmic	S	Belongs to the UPF0597 family	Chromosome	22.3723	21.714	22.6577	22.8444	21.3665	NaN	22.2514	NaN	21.504	22.6421	NaN	NaN	22.7566	21.845	NaN	22.5836	25.7101	23.1786	24.5487	25.0145	24.5971	24.6085	25.6034	24.9599	25.1976	25.9781	25.63	25.737	25.3774	24.2458	25.603	26.1607	NaN	NaN	NaN	NaN	NaN	NaN	NaN	NaN	NaN	NaN
A0A6N4CN50	Hyaluronidase	ASJ32_17985	OTHER	Cytoplasmic	G	beta-N-acetylglucosaminidase	Chromosome	22.0709	22.381	20.3344	20.8808	22.7165	22.8112	22.7226	20.3771	22.1425	22.5926	NaN	NaN	22.4428	20.2624	NaN	19.2481	22.9688	NaN	21.5167	20.6805	23.4443	22.7408	21.612	20.4752	22.0367	22.1142	NaN	NaN	22.32	21.55	NaN	20.654	NaN	NaN	NaN	NaN	NaN	NaN	NaN	NaN	NaN	NaN
A0A6N4CN51	Magnesium transporter MgtE	mgtE ASJ32_07755 GO994_20880	OTHER	CytoplasmicMembrane	P	Acts as a magnesium transporter	Chromosome	NaN	NaN	NaN	NaN	NaN	NaN	NaN	NaN	NaN	NaN	NaN	NaN	NaN	NaN	NaN	NaN	25.1204	25.6431	24.5359	25.0238	24.9135	24.0715	24.448	24.2633	24.9062	24.5152	24.8137	25.0141	24.0279	24.512	25.4276	24.6754	NaN	NaN	NaN	NaN	NaN	NaN	NaN	NaN	NaN	NaN
A0A6N4CN61	Uncharacterized protein	ASJ32_07860 GO994_20780	SP(Sec/SPI)	Unknown	ET	ABC-type amino acid transport signal transduction systems periplasmic component domain	Chromosome	22.0288	21.6712	21.1591	NaN	22.1789	21.9687	23.1205	21.688	21.1736	21.6376	NaN	NaN	22.3787	21.7376	NaN	NaN	NaN	NaN	NaN	NaN	NaN	NaN	NaN	NaN	NaN	NaN	NaN	NaN	NaN	NaN	NaN	NaN	NaN	NaN	NaN	NaN	NaN	NaN	NaN	NaN	NaN	NaN
A0A6N4CN63	Uncharacterized protein	ASJ32_18100 GO994_07580	SP(Sec/SPI)	Unknown	-	-	Chromosome	24.4124	24.6821	25.0577	24.6712	24.4652	24.1595	24.0117	24.478	25.0014	25.121	25.2424	25.3463	24.1726	24.4572	25.7497	24.0396	22.4756	NaN	21.3811	22.2299	23.2049	22.1357	21.9942	22.1092	22.191	21.5839	21.3976	NaN	22.2444	21.7274	21.6792	21.885	NaN	NaN	NaN	NaN	NaN	NaN	NaN	NaN	NaN	NaN
A0A6N4CN68	LysR family transcriptional regulator	ASJ32_07730	OTHER	Cytoplasmic	K	LysR substrate binding domain	Chromosome	NaN	NaN	NaN	NaN	NaN	NaN	NaN	NaN	NaN	NaN	NaN	NaN	NaN	NaN	NaN	NaN	21.443	NaN	NaN	NaN	21.8566	22.0047	22.5863	NaN	NaN	NaN	NaN	NaN	NaN	NaN	NaN	NaN	NaN	NaN	NaN	NaN	NaN	NaN	NaN	NaN	NaN	NaN
A0A6N4CN70	Aldehyde dehydrogenase	ASJ32_18150	OTHER	CytoplasmicMembrane	C	Belongs to the aldehyde dehydrogenase family	Chromosome	NaN	NaN	NaN	NaN	NaN	NaN	NaN	NaN	NaN	NaN	NaN	NaN	NaN	NaN	NaN	NaN	21.3424	NaN	NaN	21.9397	21.5784	20.8772	21.3813	21.2262	21.3976	NaN	20.5789	21.0399	21.5126	NaN	NaN	21.4686	NaN	NaN	NaN	NaN	NaN	NaN	NaN	NaN	NaN	NaN
A0A6N4CN77	ATP-binding cassette domain-containing protein (Methionine ABC transporter ATP-binding protein)	ASJ32_17555 GO994_03750	OTHER	CytoplasmicMembrane	V	ABC transporter, ATP-binding protein	Chromosome	23.1643	22.8488	23.4453	24.984	23.027	23.1112	22.6632	23.4571	23.1786	23.5565	25.408	24.9979	23.6457	23.984	24.7834	NaN	28.4861	28.9102	28.1733	29.6568	28.6969	28.8541	28.1117	28.3618	28.1136	28.0915	28.4342	29.1911	27.9801	28.0958	30.1055	28.978	20.8471	21.5228	21.1074	20.1694	21.3357	20.5576	20.5117	20.0887	20.4086	20.8331
A0A6N4CN86	Lysozyme (EC 3.2.1.17)	ASJ32_22785	OTHER	Unknown	G	Phage lysozyme	Chromosome	NaN	NaN	NaN	NaN	NaN	NaN	NaN	NaN	NaN	NaN	NaN	NaN	NaN	NaN	NaN	NaN	NaN	NaN	NaN	NaN	NaN	NaN	NaN	NaN	NaN	NaN	NaN	NaN	NaN	NaN	NaN	NaN	NaN	NaN	NaN	NaN	NaN	NaN	NaN	NaN	NaN	NaN
A0A6N4CN89	RNA polymerase sigma factor	ASJ32_17655	OTHER	Cytoplasmic	K	Belongs to the sigma-70 factor family. ECF subfamily	Chromosome	23.5011	23.7573	24.6826	23.8707	24.3641	24.7363	24.299	24.758	23.8698	24.6145	24.786	24.4902	23.6872	23.2124	24.2501	23.738	21.5796	22.2768	NaN	21.4615	23.0191	23.0081	22.6622	21.8603	21.7482	22.847	22.1327	20.9738	22.0656	21.4089	21.6181	22.0924	NaN	NaN	NaN	NaN	NaN	NaN	NaN	NaN	NaN	NaN
A0A6N4CN90	Energy transducer TonB	ASJ32_22005	SP(Sec/SPI)	CytoplasmicMembrane	U	MotA TolQ ExbB proton channel	Chromosome	19.7442	NaN	NaN	NaN	22.7801	NaN	NaN	22.9243	NaN	NaN	NaN	NaN	NaN	NaN	NaN	NaN	27.0359	27.1071	27.2365	27.7115	29.0443	28.8348	28.5297	29.01	26.8859	26.1757	27.2673	26.8636	26.6768	27.1124	27.1438	27.1799	NaN	NaN	NaN	NaN	20.8966	18.435	18.7134	NaN	NaN	NaN
A0A6N4CN98	N-acetylmuramoyl-L-alanine amidase	ASJ32_17705	LIPO(Sec/SPII)	CytoplasmicMembrane	V	N-acetylmuramoyl-L-alanine amidase	Chromosome	NaN	NaN	NaN	NaN	NaN	NaN	NaN	NaN	NaN	NaN	NaN	NaN	NaN	NaN	NaN	NaN	21.8052	NaN	21.8903	22.5011	22.5818	22.9666	21.9315	22.4847	21.4099	22.9922	22.692	23.2032	22.1872	21.8128	22.5923	22.3182	NaN	NaN	NaN	NaN	NaN	NaN	NaN	NaN	NaN	NaN
A0A6N4CNA1	Capsid protein	ASJ32_08580	OTHER	Unknown	S	Phage capsid scaffolding protein (GPO) serine peptidase	Chromosome	NaN	NaN	NaN	NaN	NaN	NaN	NaN	NaN	NaN	NaN	NaN	NaN	NaN	NaN	NaN	NaN	22.5574	22.1573	22.9872	NaN	NaN	NaN	22.5436	NaN	22.2844	NaN	22.0634	NaN	NaN	NaN	22.5685	22.3103	NaN	NaN	NaN	NaN	NaN	NaN	NaN	NaN	NaN	16.8581
A0A6N4CNA8	2-C-methyl-D-erythritol 4-phosphate cytidylyltransferase (EC 2.7.7.60) (4-diphosphocytidyl-2C-methyl-D-erythritol synthase) (MEP cytidylyltransferase) (MCT)	ispD ASJ32_17750	OTHER	Cytoplasmic	I	Catalyzes the formation of 4-diphosphocytidyl-2-C- methyl-D-erythritol from CTP and 2-C-methyl-D-erythritol 4- phosphate (MEP)	Chromosome	22.0614	NaN	NaN	NaN	24.1799	NaN	NaN	22.2455	NaN	NaN	NaN	NaN	NaN	NaN	NaN	NaN	23.7129	24.0888	NaN	23.1427	NaN	24.2563	24.4107	23.7465	22.5831	24.1493	24.4671	23.6288	23.535	23.2714	24.3547	24.0373	NaN	NaN	NaN	NaN	NaN	NaN	NaN	NaN	NaN	NaN
A0A6N4CNB7	Ribosome-binding factor A	rbfA ASJ32_04255 GO994_05275	OTHER	Cytoplasmic	J	One of several proteins that assist in the late maturation steps of the functional core of the 30S ribosomal subunit. Associates with free 30S ribosomal subunits (but not with 30S subunits that are part of 70S ribosomes or polysomes). Required for efficient processing of 16S rRNA. May interact with the 5'-terminal helix region of 16S rRNA	Chromosome	24.645	24.5859	25.1666	25.433	25.6791	24.2582	24.9882	24.6391	24.7513	24.8279	24.6749	25.8513	24.5947	24.2964	24.3719	25.2935	28.1764	27.2577	27.7511	27.6678	28.0996	27.1357	28.6604	27.7158	28.1404	28.7903	29.0201	28.7692	28.2665	27.217	27.3975	28.4878	20.6289	18.5671	19.008	17.4638	20.3776	20.4801	22.2718	19.7955	20.3308	21.883
A0A6N4CNB8	Bifunctional NAD pyrophosphatase/5'-nucleotidase (Bifunctional metallophosphatase/5'-nucleotidase)	ASJ32_06675 GO994_10790	OTHER	Unknown	F	Belongs to the 5'-nucleotidase family	Chromosome	23.9624	24.2433	23.1374	23.4788	23.9794	23.9649	23.995	23.3941	23.4659	24.7208	23.7738	23.5003	23.7079	22.4862	21.7245	23.4604	24.3783	24.7529	23.0308	23.9277	24.8692	24.3846	24.9384	24.177	23.7017	24.8407	24.08	24.5064	24.2949	23.3312	22.9613	24.3303	NaN	NaN	NaN	NaN	NaN	NaN	NaN	NaN	NaN	NaN
A0A6N4CND0	Peptidase M16	ASJ32_06780	SP(Sec/SPI)	CytoplasmicMembrane	S	Insulinase (Peptidase family M16)	Chromosome	23.5812	23.3836	24.6279	23.875	23.2611	23.2476	23.2823	23.6139	23.7309	23.7917	23.6984	23.816	23.1981	23.6562	23.4288	23.9063	23.829	23.886	23.4397	24.0842	22.9934	23.727	22.8495	23.9415	23.1137	23.4196	23.202	23.8098	23.722	23.6739	23.5176	24.1645	NaN	NaN	NaN	NaN	NaN	NaN	NaN	NaN	NaN	NaN
A0A6N4CND1	Cytochrome C	ASJ32_04375	SP(Sec/SPI)	Periplasmic	E	Bacterial extracellular solute-binding proteins, family 5 Middle	Chromosome	28.4988	28.633	28.3087	28.1422	29.0363	28.8385	28.8472	28.594	27.4554	28.1677	27.2004	27.2917	28.3105	28.2005	27.5638	28.4085	24.7502	22.6111	24.3386	25.3645	23.8566	23.1874	24.0745	23.4471	21.4909	22.3618	24.4525	23.4699	23.9487	24.0772	24.3634	25.1377	NaN	NaN	NaN	NaN	NaN	NaN	NaN	NaN	NaN	NaN
A0A6N4CNF2	Ribosomal protein L11 methyltransferase (L11 Mtase) (EC 2.1.1.-)	prmA ASJ32_04530 GO994_05010	OTHER	Cytoplasmic	J	Methylates ribosomal protein L11	Chromosome	23.6747	22.4865	22.3838	22.3195	24	22.069	23.3657	22.6146	22.7694	23.0507	NaN	NaN	22.2643	23.2478	NaN	22.7951	24.2249	24.5616	24.3467	23.5385	22.947	24.2169	24.789	23.8137	24.0323	24.8886	23.9781	24.7267	24.6698	23.4044	23.9548	24.3546	NaN	NaN	NaN	NaN	NaN	NaN	NaN	NaN	NaN	NaN
A0A6N4CNG6	Histidine kinase (EC 2.7.13.3)	ASJ32_07095	OTHER	CytoplasmicMembrane	T	Histidine Phosphotransfer domain	Chromosome	NaN	NaN	NaN	NaN	NaN	NaN	NaN	NaN	NaN	NaN	NaN	NaN	NaN	NaN	NaN	NaN	24.5298	22.3245	23.2768	25.3439	24.6499	24.1902	23.2122	23.0706	24.1568	24.1566	24.6584	25.3797	22.7581	24.1838	24.4811	24.562	NaN	NaN	NaN	NaN	NaN	NaN	NaN	NaN	NaN	NaN
A0A6N4CNG7	Glycine/betaine ABC transporter ATP-binding protein	ASJ32_04655	OTHER	CytoplasmicMembrane	E	glycine, betaine	Chromosome	NaN	NaN	NaN	NaN	NaN	NaN	NaN	NaN	NaN	NaN	NaN	NaN	NaN	NaN	NaN	NaN	25.4909	24.8271	24.1038	25.5697	23.8615	24.3467	24.4765	23.7507	24.0216	25.1944	24.9227	26.4123	23.4089	21.7855	24.244	24.5671	NaN	NaN	NaN	NaN	NaN	NaN	NaN	NaN	NaN	NaN
A0A6N4CNH2	3-oxoacyl-ACP synthase (EC 2.3.1.41)	ASJ32_04705	OTHER	Cytoplasmic	IQ	Beta-ketoacyl synthase, C-terminal domain	Chromosome	NaN	NaN	NaN	NaN	NaN	NaN	NaN	NaN	NaN	NaN	NaN	NaN	NaN	NaN	NaN	NaN	23.1009	NaN	25.8235	24.0511	23.5198	23.4522	24.2453	24.8265	25.2196	24.9462	24.0899	25.815	24.5529	24.7628	NaN	23.5082	NaN	NaN	NaN	NaN	NaN	NaN	NaN	NaN	NaN	NaN
A0A6N4CNI2	ATP-dependent RNA helicase RhlE	ASJ32_07200	OTHER	Cytoplasmic	L	DEAD-box RNA helicase involved in ribosome assembly. Has RNA-dependent ATPase activity and unwinds double-stranded RNA	Chromosome	24.1964	23.2698	23.6065	25.8172	24.1254	23.5326	23.5735	24.0262	24.5372	23.9043	25.689	26.1744	25.1268	23.9728	25.629	26.3012	28.5349	28.3958	27.8605	28.7742	28.323	27.9596	28.1855	27.9954	28.6003	28.2706	28.3476	29.1595	28.2002	27.8053	28.0214	28.7328	23.6939	23.5854	22.6242	23.3772	21.8258	21.4841	21.49	21.375	23.2341	23.4608
A0A6N4CNI7	Pseudouridine-5'-phosphate glycosidase (PsiMP glycosidase) (EC 4.2.1.70)	psuG ASJ32_04805	OTHER	Cytoplasmic	Q	Catalyzes the reversible cleavage of pseudouridine 5'- phosphate (PsiMP) to ribose 5-phosphate and uracil. Functions biologically in the cleavage direction, as part of a pseudouridine degradation pathway	Chromosome	21.9473	19.824	NaN	NaN	22.3678	21.3909	21.4011	20.2306	NaN	NaN	NaN	NaN	21.3278	NaN	NaN	NaN	24.163	24.113	22.4434	22.6142	24.3067	23.6598	24.1483	23.2864	21.0193	23.6959	20.455	22.3313	24.0434	21.3991	22.3609	24.0582	NaN	NaN	NaN	NaN	NaN	NaN	NaN	NaN	NaN	NaN
A0A6N4CNJ0	ATP-dependent endonuclease (DUF2813 domain-containing protein)	ASJ32_07250 GO994_11220	OTHER	Cytoplasmic	L	Protein of unknown function (DUF2813)	Chromosome	20.1689	21.7368	22.7469	20.1841	21.1913	22.0943	20.4134	NaN	22.532	NaN	23.1997	NaN	21.1055	22.7894	23.2886	20.9316	21.9257	NaN	22.0108	NaN	22.0187	21.9869	NaN	20.9657	21.5085	NaN	NaN	NaN	NaN	NaN	NaN	NaN	NaN	NaN	NaN	NaN	NaN	NaN	NaN	NaN	NaN	NaN
A0A6N4CNJ3	Esterase FrsA (EC 3.1.1.1)	frsA ASJ32_04855	OTHER	Cytoplasmic	S	Belongs to the UPF0255 family	Chromosome	23.322	23.1581	21.2323	23.0678	24.5178	24.0789	24.1677	23.5301	22.3473	22.4987	21.0856	22.3733	21.654	22.9177	23.084	21.908	24.0686	24.9611	24.5345	22.6791	25.0743	25.1551	24.9543	24.1732	24.5114	24.082	24.5123	24.0378	23.8356	23.754	24.4463	24.0284	NaN	NaN	NaN	NaN	NaN	NaN	NaN	NaN	NaN	NaN
A0A6N4CNK1	Uncharacterized protein	ASJ32_04905	SP(Sec/SPI)	Unknown	D	Protein of unknown function (DUF3450)	Chromosome	23.4648	23.674	24.9918	24.4381	25.314	26.028	25.199	26.1882	21.5838	22.912	21.7787	22.6749	23.566	24.3759	24.7659	24.2758	24.2945	23.9697	22.9592	25.87	26.5843	26.2757	26.3717	26.6792	20.2035	NaN	20.7169	21.1453	24.4979	23.8276	25.2324	25.8497	NaN	NaN	NaN	NaN	17.6752	NaN	17.1497	NaN	NaN	NaN
A0A6N4CNK8	Opacity-associated protein A	ASJ32_04975	OTHER	CytoplasmicMembrane	M	Opacity-associated protein A LysM-like domain	Chromosome	NaN	NaN	NaN	NaN	NaN	NaN	NaN	NaN	NaN	NaN	NaN	NaN	NaN	NaN	NaN	NaN	26.6495	26.4906	26.5551	27.3565	26.148	25.867	26.3514	26.4238	26.6984	26.6246	27.0956	26.212	26.3017	26.7004	26.1497	26.7738	NaN	NaN	NaN	NaN	NaN	NaN	NaN	NaN	NaN	NaN
A0A6N4CNL2	N5-carboxyaminoimidazole ribonucleotide synthase (N5-CAIR synthase) (EC 6.3.4.18) (5-(carboxyamino)imidazole ribonucleotide synthetase)	purK ASJ32_21635	OTHER	CytoplasmicMembrane	F	Catalyzes the ATP-dependent conversion of 5- aminoimidazole ribonucleotide (AIR) and HCO(3)(-) to N5- carboxyaminoimidazole ribonucleotide (N5-CAIR)	Chromosome	26.2659	26.6736	24.8119	26.035	26.5484	26.4256	27.0597	25.5185	25.6426	27.1264	26.4108	27.3893	26.723	26.534	25.9556	26.7385	27.1622	27.1155	26.7754	26.6003	26.8777	27.6665	27.1013	27.0787	26.6952	27.8193	27.4248	28.2384	27.2539	27.2911	28.3501	27.9344	NaN	NaN	NaN	NaN	NaN	NaN	NaN	NaN	NaN	NaN
A0A6N4CNL5	M6 family metalloprotease domain-containing protein (Protease)	ASJ32_05045 GO994_04425	SP(Sec/SPI)	Unknown	O	peptidase M6 immune inhibitor A	Chromosome	22.263	20.4095	NaN	20.6492	24.8826	23.87	24.3085	23.7693	NaN	NaN	NaN	NaN	NaN	21.2419	NaN	20.4804	23.1747	NaN	22.3076	23.5727	24.2035	24.4182	24.4343	24.6711	NaN	NaN	NaN	NaN	22.3597	21.9219	21.7792	23.1815	NaN	NaN	NaN	NaN	NaN	NaN	NaN	NaN	NaN	NaN
A0A6N4CNL6	Ribosomal RNA large subunit methyltransferase F (EC 2.1.1.181) (23S rRNA mA1618 methyltransferase) (rRNA adenine N-6-methyltransferase)	rlmF ASJ32_07930	OTHER	Cytoplasmic	J	Specifically methylates the adenine in position 1618 of 23S rRNA	Chromosome	21.0739	20.0531	20.9784	22.1548	21.9146	NaN	NaN	NaN	NaN	21.3313	22.1664	21.7382	20.9693	NaN	NaN	21.4268	23.7308	23.4852	23.273	24.0643	24.0194	24.0054	24.6139	24.3838	22.8542	24.1109	22.8976	23.9602	24.1206	23.5434	23.8126	24.6032	NaN	NaN	NaN	NaN	NaN	NaN	NaN	NaN	NaN	NaN
A0A6N4CNM2	Uncharacterized protein	ASJ32_05110	OTHER	Cytoplasmic	S	protein conserved in bacteria	Chromosome	26.5607	27.1367	27.5803	26.7193	25.6273	24.591	25.6765	26.2023	26.0439	25.1073	26.5139	25.4949	26.8839	27.5376	26.2128	26.6404	27.1586	NaN	26.0533	25.9729	27.8382	26.7365	26.0922	25.7047	25.5182	24.959	25.1386	NaN	25.7269	26.6665	NaN	25.973	NaN	17.4957	NaN	17.5691	18.9809	NaN	18.4983	NaN	NaN	18.9145
A0A6N4CNM6	Uncharacterized protein	ASJ32_22780	OTHER	Unknown	-	-	Chromosome	NaN	NaN	NaN	NaN	NaN	NaN	NaN	NaN	NaN	NaN	NaN	NaN	NaN	NaN	NaN	NaN	NaN	NaN	NaN	NaN	NaN	NaN	NaN	NaN	NaN	NaN	NaN	NaN	NaN	NaN	NaN	NaN	NaN	NaN	NaN	NaN	NaN	NaN	NaN	NaN	NaN	NaN
A0A6N4CNM8	Dihydropteroate synthase (DHPS) (EC 2.5.1.15) (Dihydropteroate pyrophosphorylase)	folP ASJ32_04300 GO994_05230	OTHER	Cytoplasmic	H	Catalyzes the condensation of para-aminobenzoate (pABA) with 6-hydroxymethyl-7,8-dihydropterin diphosphate (DHPt-PP) to form 7,8-dihydropteroate (H2Pte), the immediate precursor of folate derivatives	Chromosome	24.7845	25.7285	24.0461	23.2819	25.8597	25.0245	25.7895	24.6885	25.5848	25.6874	24.3889	24.6932	24.9133	24.4818	NaN	24.2863	21.8606	NaN	21.9192	NaN	NaN	21.9232	21.4295	NaN	21.8778	22.1692	21.9637	21.1951	22.115	21.7471	NaN	NaN	NaN	NaN	NaN	NaN	NaN	NaN	NaN	NaN	NaN	NaN
A0A6N4CNN8	OmpA-like domain-containing protein	ASJ32_08085	SP(Sec/SPI)	OuterMembrane	M	Belongs to the ompA family	Chromosome	23.0204	23.3707	24.0926	24.3871	23.9437	23.5645	23.3444	23.9529	23.0983	23.2501	24.8496	23.5241	23.8751	23.8297	25.4679	24.4917	29.1182	29.1202	28.2686	29.9235	29.7927	29.7793	30.0352	30.6039	28.5359	28.8942	28.5	28.5502	27.8223	28.2006	29.9754	29.7236	26.7013	26.5391	27.1893	27.3514	27.8623	26.9438	26.9087	26.7769	26.2657	27.2141
A0A6N4CNP1	Oxidoreductase	ASJ32_08575	OTHER	Unknown	S	Phage major capsid protein, P2 family	Chromosome	22.9237	21.3899	23.7125	23.9216	21.223	NaN	21.1348	20.9225	22.7522	21.2536	22.5079	21.6656	21.4688	21.4939	NaN	23.1853	26.3468	25.6348	26.3251	26.8541	24.8348	23.9927	24.4945	24.8454	25.5737	25.8481	25.7327	26.1456	24.799	25.3901	25.5563	26.5644	18.9039	19.6553	20.1104	19.2142	21.61	NaN	18.6507	NaN	NaN	18.2545
A0A6N4CNP3	Cell division protein DamX	ASJ32_17330	OTHER	CytoplasmicMembrane	U	Sporulation related domain	Chromosome	22.2547	22.1726	23.9265	24.0207	21.8126	21.8765	21.2575	22.1671	22.2286	21.9794	24.0255	23.4044	22.6145	22.1934	24.4991	23.9527	27.7184	28.7428	27.2739	29.4186	27.6557	27.1868	27.5915	28.098	27.6312	27.3835	28.1381	28.1805	27.3466	27.1192	28.4729	28.1181	19.7435	21.528	21.1032	21.0513	21.2617	21.3921	22.1521	22.1665	22.5155	21.744
A0A6N4CNQ1	Uncharacterized protein	ASJ32_08520	OTHER	Unknown	S	Phage tail assembly chaperone	Chromosome	NaN	NaN	23.2224	22.5167	NaN	NaN	NaN	NaN	NaN	NaN	NaN	NaN	NaN	NaN	NaN	NaN	NaN	NaN	NaN	NaN	NaN	NaN	NaN	NaN	NaN	NaN	NaN	NaN	NaN	NaN	NaN	NaN	NaN	NaN	NaN	NaN	NaN	NaN	NaN	NaN	NaN	NaN
A0A6N4CNQ4	Transcriptional regulator	ASJ32_08190	OTHER	Cytoplasmic	GK	Glucokinase	Chromosome	NaN	NaN	NaN	NaN	NaN	NaN	NaN	NaN	NaN	NaN	NaN	NaN	NaN	NaN	NaN	NaN	22.3137	NaN	21.6738	22.6725	22.7762	23.1718	24.0223	22.9579	21.5339	NaN	NaN	NaN	22.1967	21.9343	NaN	22.765	NaN	NaN	NaN	NaN	NaN	NaN	NaN	NaN	NaN	NaN
A0A6N4CNQ5	DUF1338 family protein (Succinyldiaminopimelate aminotransferase)	ASJ32_17380 GO994_05970	OTHER	Unknown	S	DUF1338	Chromosome	22.4709	23.2421	NaN	20.8146	23.1104	22.7611	24.025	22.4298	22.7972	23.0355	21.4122	20.7791	22.9152	22.986	21.9311	22.2964	23.0851	NaN	23.6639	23.2626	NaN	NaN	NaN	NaN	24.7547	23.3314	23.6409	23.3448	24.3966	22.0786	NaN	21.1613	NaN	NaN	NaN	NaN	NaN	NaN	NaN	NaN	NaN	NaN
A0A6N4CNR2	Transcriptional regulatory protein	ASJ32_08245 GO994_15450	OTHER	Cytoplasmic	K	transcriptional regulatory protein	Chromosome	NaN	NaN	NaN	NaN	NaN	NaN	NaN	NaN	NaN	NaN	NaN	NaN	NaN	NaN	NaN	NaN	21.4443	NaN	20.8353	NaN	20.9046	21.1453	21.0455	NaN	NaN	21.4414	NaN	NaN	NaN	NaN	NaN	22.0189	NaN	NaN	NaN	NaN	NaN	NaN	NaN	NaN	NaN	NaN
A0A6N4CNR3	J domain-containing protein	ASJ32_17435	OTHER	CytoplasmicMembrane	O	Heat shock protein DnaJ domain protein	Chromosome	NaN	NaN	NaN	NaN	NaN	NaN	NaN	NaN	NaN	NaN	NaN	NaN	NaN	NaN	NaN	NaN	22.6553	NaN	21.8704	22.7205	22.6181	22.1511	22.0031	22.1064	NaN	20.669	21.5559	22.5923	21.2372	21.3315	22.7671	24.2758	NaN	NaN	NaN	NaN	NaN	NaN	NaN	NaN	NaN	NaN
A0A6N4CNR5	Corrinoid adenosyltransferase (EC 2.5.1.17)	ASJ32_21090	OTHER	Cytoplasmic	H	ATP cob(I)alamin adenosyltransferase	Chromosome	NaN	NaN	NaN	NaN	23.4604	NaN	NaN	NaN	NaN	NaN	NaN	NaN	NaN	22.8871	NaN	21.7729	24.3629	NaN	25.4333	NaN	NaN	25.5099	25.3708	NaN	25.1005	24.9475	25.3154	25.1391	25.4538	23.8329	NaN	25.3228	NaN	NaN	NaN	NaN	NaN	NaN	NaN	NaN	NaN	NaN
A0A6N4CNR9	Uncharacterized protein	ASJ32_16955	OTHER	Cytoplasmic	-	-	Chromosome	NaN	NaN	NaN	21.556	NaN	NaN	NaN	21.0008	NaN	NaN	NaN	NaN	NaN	NaN	NaN	NaN	25.288	24.2072	24.7335	25.2405	25.962	25.5106	25.6402	25.6528	25.4136	25.3962	25.9514	24.9648	25.0363	24.9343	24.8797	25.1612	NaN	NaN	NaN	NaN	NaN	NaN	NaN	NaN	NaN	NaN
A0A6N4CNS6	Uncharacterized protein	ASJ32_08355	OTHER	Unknown	-	-	Chromosome	NaN	NaN	NaN	NaN	NaN	NaN	NaN	NaN	NaN	NaN	NaN	NaN	NaN	NaN	NaN	NaN	23.6147	22.721	22.5973	24.0122	22.713	22.0482	21.5137	22.5097	22.8038	23.2427	23.2544	23.7165	22.256	22.8239	23.3639	23.2818	NaN	NaN	NaN	NaN	NaN	NaN	NaN	NaN	NaN	NaN
A0A6N4CNS7	Ribosomal silencing factor RsfS	rsfS ASJ32_17010 GO994_05600	OTHER	Cytoplasmic	J	Functions as a ribosomal silencing factor. Interacts with ribosomal protein L14 (rplN), blocking formation of intersubunit bridge B8. Prevents association of the 30S and 50S ribosomal subunits and the formation of functional ribosomes, thus repressing translation	Chromosome	23.7366	22.8586	24.8169	22.7943	23.1287	23.4581	22.8257	22.693	23.2681	23.2696	25.2559	23.0268	23.9479	23.7014	24.7863	22.3461	23.7288	22.4531	23.604	NaN	23.9553	21.8673	23.1948	22.6276	23.1748	23.708	22.4392	21.9643	23.8264	23.018	22.2377	21.3357	NaN	NaN	NaN	NaN	NaN	NaN	NaN	NaN	NaN	NaN
A0A6N4CNT0	Porphobilinogen deaminase (PBG) (EC 2.5.1.61) (Hydroxymethylbilane synthase) (HMBS) (Pre-uroporphyrinogen synthase)	hemC ASJ32_05990	OTHER	Cytoplasmic	H	Tetrapolymerization of the monopyrrole PBG into the hydroxymethylbilane pre-uroporphyrinogen in several discrete steps	Chromosome	22.1583	21.6678	20.3586	22.0775	22.7383	21.8265	22.7588	22.411	23.0343	23.1593	22.2976	22.8311	22.6674	21.165	20.4093	22.8994	NaN	NaN	21.3942	NaN	NaN	NaN	NaN	NaN	21.2435	NaN	21.3639	NaN	22.0053	21.0092	20.5875	21.1402	NaN	NaN	NaN	NaN	NaN	NaN	NaN	NaN	NaN	NaN
A0A6N4CNT2	AAA family ATPase (Nucleoside triphosphate hydrolase)	ASJ32_17060 GO994_05650	OTHER	Cytoplasmic	T	PhoH-like protein	Chromosome	26.5072	26.1111	25.9204	26.4441	26.2855	26.3786	25.8417	26.3113	26.3331	25.8202	26.4391	26.3018	25.9843	26.6747	26.4459	25.9635	25.2139	25.8291	25.3012	24.9806	24.1895	25.8222	25.4838	25.8887	24.9015	25.5597	24.7803	25.1895	25.2269	25.156	25.6635	25.9803	NaN	NaN	NaN	NaN	NaN	NaN	NaN	NaN	NaN	NaN
A0A6N4CNT4	S-adenosylmethionine synthase (AdoMet synthase) (EC 2.5.1.6) (MAT) (Methionine adenosyltransferase)	metK ASJ32_08405 GO994_16830	OTHER	Cytoplasmic	H	Catalyzes the formation of S-adenosylmethionine (AdoMet) from methionine and ATP. The overall synthetic reaction is composed of two sequential steps, AdoMet formation and the subsequent tripolyphosphate hydrolysis which occurs prior to release of AdoMet from the enzyme	Chromosome	27.2961	27.663	27.3229	27.6443	26.7403	27.3496	27.3718	27.8564	27.2611	27.6985	27.3216	27.9986	27.5107	27.3362	26.844	27.9921	28.0833	28.0755	27.6406	27.7616	28.3399	27.9968	27.7464	27.8777	28.1075	28.4002	27.1732	27.8754	28.4787	28.3034	26.9393	27.7242	21.5727	21.1388	20.7768	20.9337	20.2463	20.226	19.977	17.6614	21.437	21.7057
A0A6N4CNU1	Phage tail protein	ASJ32_08545	OTHER	Unknown	S	Protein of unknown function (DUF2597)	Chromosome	24.1671	23.285	24.1508	24.2775	24.3945	NaN	23.8803	23.8512	24.6086	24.4727	25.4598	NaN	22.4174	22.9559	24.5411	23.4925	24.46	27.5711	26.0337	25.0819	25.6559	25.8195	25.9509	26.4937	24.4586	25.4342	25.9116	26.0098	25.404	NaN	27.1842	25.6305	20.933	20.2942	20.9701	20.4966	24.2432	20.6717	21.9188	21.1752	18.5383	19.7244
A0A6N4CNV5	Aerolysin	ASJ32_06145	SP(Sec/SPI)	Extracellular	S	Aerolysin toxin	Chromosome	21.6132	23.2277	20.8218	NaN	24.7271	25.4025	25.1932	25.5904	NaN	NaN	NaN	NaN	23.4758	22.4646	21.1286	22.4909	25.041	22.8587	24.3062	24.8142	25.1585	25.5473	25.0055	24.9104	23.3191	23.2963	24.7258	23.1729	24.7623	25.1329	24.5862	25.3557	NaN	NaN	NaN	NaN	NaN	NaN	NaN	NaN	NaN	NaN
A0A6N4CNW0	Fumarate reductase iron-sulfur subunit (EC 1.3.5.4) (Quinol-fumarate reductase iron-sulfur subunit)	ASJ32_17215	OTHER	CytoplasmicMembrane	C	Belongs to the succinate dehydrogenase fumarate reductase iron-sulfur protein family	Chromosome	21.7009	21.581	22.8706	22.4966	NaN	NaN	NaN	NaN	20.7208	21.335	22.3907	21.9064	NaN	NaN	21.8892	21.0591	22.8505	NaN	22.9263	23.7388	NaN	20.9611	NaN	NaN	22.3288	21.8697	22.2756	23.2701	22.2598	22.2177	22.5044	23.4092	NaN	NaN	16.7105	16.3673	NaN	NaN	NaN	NaN	NaN	18.0852
A0A6N4CNW4	Amidohydrolase (Carbon-nitrogen hydrolase family protein)	ASJ32_06255 GO994_02825	OTHER	Cytoplasmic	S	Carbon-nitrogen hydrolase	Chromosome	23.0978	23.4753	23.1443	23.3339	23.5509	24.1366	24.5268	24.4654	22.2202	23.9939	22.7867	22.8625	23.0714	21.8418	NaN	23.3191	20.9854	NaN	NaN	NaN	21.4557	NaN	21.5047	NaN	NaN	NaN	NaN	NaN	NaN	NaN	NaN	NaN	NaN	NaN	NaN	NaN	NaN	NaN	NaN	NaN	NaN	NaN
A0A6N4CNY5	Signal recognition particle receptor FtsY (SRP receptor)	ftsY ASJ32_06410	OTHER	Cytoplasmic	D	Involved in targeting and insertion of nascent membrane proteins into the cytoplasmic membrane. Acts as a receptor for the complex formed by the signal recognition particle (SRP) and the ribosome-nascent chain (RNC). Interaction with SRP-RNC leads to the transfer of the RNC complex to the Sec translocase for insertion into the membrane, the hydrolysis of GTP by both Ffh and FtsY, and the dissocia…	Chromosome	26.012	24.4625	25.826	26.9389	26.5025	24.8543	25.5877	24.1278	24.4363	24.47	25.604	25.2745	25.6563	24.6061	24.6134	25.6252	28.2571	28.2092	27.9698	28.5294	28.3098	28.4073	28.722	28.1534	28.1692	28.6789	28.4145	28.6197	28.4974	28.1937	28.1974	28.6658	21.6506	21.8543	20.2037	20.4883	21.1883	20.779	21.6427	20.2504	21.778	21.7824
A0A6N4CP06	Regulator	ASJ32_07300	OTHER	Cytoplasmic	J	Endoribonuclease L-PSP	Chromosome	25.5051	24.878	25.5289	25.423	25.7378	25.2788	26.8014	25.6979	24.0783	24.4637	24.6494	25.1281	24.6313	23.6887	23.937	25.3062	NaN	NaN	NaN	NaN	NaN	NaN	NaN	NaN	NaN	NaN	NaN	NaN	NaN	NaN	NaN	NaN	NaN	NaN	NaN	NaN	NaN	NaN	NaN	NaN	NaN	NaN
A0A6N4CP08	UDP-N-acetylglucosamine 1-carboxyvinyltransferase (EC 2.5.1.7) (Enoylpyruvate transferase) (UDP-N-acetylglucosamine enolpyruvyl transferase) (EPT)	murA ASJ32_16305	OTHER	Cytoplasmic	M	Cell wall formation. Adds enolpyruvyl to UDP-N- acetylglucosamine	Chromosome	26.304	25.4934	25.3362	25.6354	27.0155	26.5557	26.4956	25.8518	25.4931	25.6612	24.0734	25.5093	25.9756	25.5471	23.5477	25.0149	26.8153	26.3991	26.9935	25.3885	26.9185	26.3867	26.6594	26.2198	26.7647	26.9727	26.2909	26.8578	27.1082	26.3496	25.1246	26.9335	NaN	NaN	NaN	NaN	NaN	NaN	NaN	NaN	NaN	17.1887
A0A6N4CP13	Elongation factor Tu (EF-Tu)	tuf ASJ32_07355 GO994_01640 GO994_01730	OTHER	Cytoplasmic	J	This protein promotes the GTP-dependent binding of aminoacyl-tRNA to the A-site of ribosomes during protein biosynthesis	Chromosome	31.4711	31.6668	30.9929	30.8924	31.373	31.6152	31.5043	31.0793	31.223	31.8393	30.6892	30.9436	31.6395	31.4354	29.9214	31.1713	31.9204	31.5262	32.0035	31.5251	31.9197	31.61	32.0055	31.7073	32.0138	32.2492	31.4247	31.7141	32.1405	31.9787	30.953	31.8434	25.1943	25.0949	24.2109	24.7531	24.6778	24.1812	24.3269	23.9154	24.6798	26.115
A0A6N4CP15	Methionine synthase (EC 2.1.1.13) (5-methyltetrahydrofolate--homocysteine methyltransferase)	ASJ32_06175	OTHER	Cytoplasmic	E	Methionine synthase	Chromosome	22.4522	22.2757	22.8883	23.8945	22.8069	NaN	21.2518	21.4942	NaN	NaN	21.3256	NaN	22.8127	22.6639	23.0213	23.9577	27.5609	26.5034	26.7073	27.6756	25.4678	23.9951	24.8915	24.6838	24.6667	25.0647	24.7219	25.4684	27.0011	26.8181	27.9008	27.8156	20.5979	20.0055	20.224	20.2888	19.2361	NaN	NaN	17.2796	NaN	19.0357
A0A6N4CP16	Lipopolysaccharide export system protein LptA	lptA ASJ32_16355	SP(Sec/SPI)	Unknown	S	Involved in the assembly of lipopolysaccharide (LPS). Required for the translocation of LPS from the inner membrane to the outer membrane. May form a bridge between the inner membrane and the outer membrane, via interactions with LptC and LptD, thereby facilitating LPS transfer across the periplasm	Chromosome	24.3391	24.0915	25.7952	24.8502	24.0967	23.87	24.5874	25.1542	24.0337	24.5895	25.446	25.6331	23.9632	23.7633	24.802	24.9468	24.3877	24.7694	24.3678	24.6144	24.3675	24.2201	24.7678	25.4906	24.2781	24.4843	25.1209	25.2991	23.6758	23.6296	25.4686	24.8933	NaN	NaN	NaN	NaN	NaN	NaN	NaN	NaN	NaN	16.879
A0A6N4CP19	LysR family transcriptional regulator	ASJ32_09290	OTHER	Unknown	K	LysR substrate binding domain	Chromosome	NaN	NaN	NaN	NaN	NaN	NaN	NaN	NaN	NaN	NaN	NaN	NaN	NaN	NaN	NaN	NaN	22.1664	NaN	21.285	21.482	22.8736	22.4432	22.0701	22.068	NaN	21.2139	19.6542	NaN	20.9636	NaN	NaN	20.6002	NaN	NaN	NaN	NaN	NaN	NaN	NaN	NaN	NaN	NaN
A0A6N4CP23	Histidine kinase (EC 2.7.13.3)	ASJ32_07415	OTHER	CytoplasmicMembrane	T	Histidine kinase	Chromosome	NaN	NaN	NaN	NaN	NaN	NaN	NaN	NaN	NaN	NaN	NaN	NaN	NaN	NaN	NaN	NaN	24.6317	22.0811	24.5716	24.5933	24.1151	24.6622	24.0889	24.5188	24.9548	24.4345	25.6333	24.534	24.958	24.157	24.4483	24.8317	NaN	NaN	NaN	NaN	NaN	NaN	NaN	NaN	NaN	NaN
A0A6N4CP26	Uncharacterized protein	ASJ32_07920	SP(Sec/SPI)	OuterMembrane	S	Protein of unknown function, DUF481	Chromosome	NaN	NaN	NaN	NaN	NaN	NaN	NaN	NaN	NaN	NaN	NaN	NaN	NaN	NaN	NaN	NaN	22.3189	NaN	22.1602	22.8524	22.4683	22.1206	NaN	22.537	22.9062	21.7264	22.6598	22.8481	21.7088	NaN	23.2349	22.8742	18.5673	18.6343	18.6689	18.517	18.6109	18.5924	NaN	18.284	19.0213	19.0995
A0A6N4CP31	50S ribosomal protein L13	rplM ASJ32_16460	OTHER	Cytoplasmic	J	This protein is one of the early assembly proteins of the 50S ribosomal subunit, although it is not seen to bind rRNA by itself. It is important during the early stages of 50S assembly	Chromosome	30.0396	29.44	27.3174	30.2969	28.1048	26.9025	28.0125	27.7788	30.3439	29.4084	30.9414	30.3145	31.0173	30.0389	31.5089	30.6499	31.3281	29.0487	31.6267	30.792	31.493	30.5144	31.0112	30.7871	31.6641	30.9163	30.8802	30.1251	30.6742	30.828	28.7009	30.6984	NaN	NaN	NaN	18.7203	18.9689	NaN	20.3289	NaN	19.3037	17.3774
A0A6N4CP35	Anthranilate phosphoribosyltransferase (EC 2.4.2.18)	trpD ASJ32_21000	OTHER	Cytoplasmic	F	Catalyzes the transfer of the phosphoribosyl group of 5- phosphorylribose-1-pyrophosphate (PRPP) to anthranilate to yield N-(5'-phosphoribosyl)-anthranilate (PRA)	Chromosome	23.7037	25.2799	23.6012	23.6634	24.4182	23.8193	25.7354	24.6263	22.6802	23.3877	23.3506	24.4597	23.301	20.6484	NaN	22.9426	24.4301	24.2487	24.388	24.3268	26.3996	26.1717	26.3863	25.2364	24.5476	24.9148	24.0622	24.4745	24.7084	24.4891	NaN	24.9066	NaN	NaN	NaN	NaN	NaN	NaN	NaN	NaN	NaN	NaN
A0A6N4CP36	Cardiolipin synthase A (CL synthase) (EC 2.7.8.-)	cls clsA ASJ32_07970	OTHER	CytoplasmicMembrane	I	Catalyzes the reversible phosphatidyl group transfer from one phosphatidylglycerol molecule to another to form cardiolipin (CL) (diphosphatidylglycerol) and glycerol	Chromosome	NaN	NaN	NaN	NaN	NaN	NaN	NaN	NaN	NaN	NaN	NaN	NaN	NaN	NaN	NaN	NaN	22.5612	NaN	23.1308	22.6894	23.6213	23.0123	22.8791	22.259	23.0752	21.9838	23.5497	23.8022	23.1591	23.5305	22.7339	22.3227	NaN	NaN	NaN	NaN	NaN	NaN	NaN	NaN	NaN	NaN
A0A6N4CP37	Peptidyl-prolyl cis-trans isomerase (PPIase) (EC 5.2.1.8)	ASJ32_09315	OTHER	Cytoplasmic	O	PPIases accelerate the folding of proteins. It catalyzes the cis-trans isomerization of proline imidic peptide bonds in oligopeptides	Chromosome	27.3556	27.9879	26.6362	26.4088	27.5427	27.1587	27.7723	27.1939	26.3954	27.4161	26.3741	26.3162	26.9416	26.8056	25.0804	26.8561	23.931	24.5202	25.798	23.8293	24.6194	24.3401	23.3406	22.4992	25.6262	25.049	25.6217	24.8684	25.1823	25.4167	22.8749	23.4534	NaN	NaN	NaN	NaN	NaN	NaN	NaN	NaN	NaN	16.2847
A0A6N4CP38	Sodium:dicarboxylate symporter	ASJ32_07520	OTHER	CytoplasmicMembrane	U	Belongs to the dicarboxylate amino acid cation symporter (DAACS) (TC 2.A.23) family	Chromosome	NaN	NaN	NaN	NaN	NaN	NaN	NaN	NaN	NaN	NaN	NaN	NaN	NaN	NaN	NaN	NaN	23.4173	NaN	23.8129	NaN	NaN	NaN	NaN	NaN	24.2404	NaN	24.5345	NaN	23.9278	24.0817	22.8869	22.9367	NaN	NaN	NaN	NaN	NaN	NaN	NaN	NaN	NaN	NaN
A0A6N4CP48	L,D-transpeptidase	ASJ32_20905	SP(Sec/SPI)	Unknown	M	L,D-transpeptidase catalytic domain	Chromosome	26.8053	26.7015	26.857	26.0666	26.9284	26.3185	26.5429	26.4064	26.0749	26.6433	25.6509	26.0706	26.2716	25.9821	24.927	26.389	25.9036	26.723	25.7352	26.1168	24.0528	25.7184	25.9393	25.4854	25.7582	26.5882	26.5248	26.053	25.9923	25.3611	26.4591	26.5869	18.2076	NaN	NaN	17.0768	NaN	NaN	19.0476	NaN	NaN	18.6015
A0A6N4CP49	Dehydratase (MaoC family dehydratase)	ASJ32_07925 GO994_15915	OTHER	Cytoplasmic	I	Dehydratase	Chromosome	NaN	NaN	NaN	NaN	NaN	NaN	NaN	NaN	NaN	NaN	NaN	NaN	NaN	NaN	NaN	NaN	22.0674	23.2323	22.3142	23.5699	22.2153	22.1637	21.6512	22.4245	21.8645	NaN	23.0972	22.534	22.6996	22.7997	NaN	23.0524	NaN	NaN	NaN	NaN	NaN	NaN	NaN	NaN	NaN	NaN
A0A6N4CP50	Flagellar motor switch protein FliG	fliG ASJ32_16570	OTHER	Cytoplasmic	N	FliG middle domain	Chromosome	NaN	21.8178	NaN	NaN	22.338	NaN	NaN	NaN	NaN	NaN	NaN	NaN	NaN	NaN	NaN	NaN	22.3192	NaN	22.9953	NaN	22.9463	22.8975	22.5049	NaN	22.1584	NaN	22.621	NaN	22.0701	NaN	NaN	NaN	NaN	NaN	NaN	NaN	NaN	NaN	NaN	NaN	NaN	NaN
A0A6N4CP51	Head protein	ASJ32_22740	OTHER	Unknown	S	Phage head completion protein (GPL)	Chromosome	NaN	NaN	NaN	NaN	NaN	NaN	NaN	NaN	NaN	NaN	NaN	NaN	NaN	NaN	NaN	NaN	NaN	NaN	NaN	NaN	NaN	NaN	NaN	NaN	NaN	NaN	NaN	NaN	NaN	NaN	NaN	NaN	NaN	NaN	NaN	NaN	NaN	NaN	NaN	NaN	NaN	NaN
A0A6N4CP54	Uncharacterized protein	ASJ32_08075 GO994_15240	OTHER	CytoplasmicMembrane	-	-	Chromosome	NaN	NaN	NaN	22.7596	NaN	22.1227	NaN	23.3352	23.1499	23.1744	NaN	23.7255	NaN	NaN	NaN	22.7788	25.1204	24.5638	23.799	24.1631	25.4197	25.2087	25.807	23.9641	24.7476	24.9124	24.8944	24.6197	23.6717	23.5484	24.7477	25.3986	17.1897	NaN	NaN	NaN	NaN	NaN	NaN	NaN	NaN	17.3832
A0A6N4CP55	NAD(P)-bd_dom domain-containing protein	ASJ32_20755	OTHER	Unknown	GM	NAD(P)H-binding	Chromosome	18.2817	19.8455	NaN	19.6244	24.5218	24.7599	25.5075	25.8105	NaN	NaN	NaN	NaN	17.5285	NaN	NaN	NaN	24.07	24.547	23.5207	24.2211	26.7085	26.4676	27.2971	26.1096	20.3924	20.8503	21.2679	21.5927	22.4033	21.8061	23.4373	22.7485	NaN	17.3814	NaN	NaN	18.9683	17.4774	18.7342	18.2406	NaN	NaN
A0A6N4CP57	Uncharacterized protein	ASJ32_07975	LIPO(Sec/SPII)	Unknown	S	Protein of unknown function (DUF1439)	Chromosome	22.4331	22.0576	21.736	21.6817	22.4898	21.8973	22.841	22.003	21.9223	22.9338	22.0301	22.1945	21.3331	21.8414	21.4679	21.8973	NaN	NaN	NaN	NaN	NaN	NaN	NaN	19.4285	NaN	NaN	NaN	NaN	NaN	NaN	NaN	20.8835	NaN	NaN	NaN	NaN	NaN	NaN	NaN	NaN	NaN	NaN
A0A6N4CP58	Protein ligase	ASJ32_08125	OTHER	Unknown	H	Lipoate-protein ligase	Chromosome	NaN	NaN	NaN	NaN	NaN	NaN	NaN	NaN	NaN	NaN	NaN	NaN	NaN	NaN	NaN	NaN	22.4534	NaN	NaN	22.6538	23.2825	22.0243	23.3863	23.5424	NaN	22.5093	NaN	NaN	NaN	NaN	NaN	NaN	NaN	NaN	NaN	NaN	NaN	NaN	NaN	NaN	NaN	NaN
A0A6N4CP60	RNA polymerase subunit sigma	ASJ32_07695	OTHER	Unknown	K	ECF sigma factor	Chromosome	21.0733	NaN	NaN	NaN	21.7842	22.0113	21.6773	NaN	NaN	21.3971	NaN	NaN	21.2399	NaN	NaN	20.6036	NaN	NaN	NaN	NaN	NaN	23.304	24.0805	23.2529	NaN	NaN	NaN	NaN	NaN	NaN	NaN	NaN	NaN	NaN	NaN	NaN	NaN	NaN	NaN	NaN	NaN	NaN
A0A6N4CP62	Decarboxylase	ASJ32_20805	OTHER	Unknown	E	decarboxylase	Chromosome	24.2947	23.3151	24.2262	24.241	24.3578	24.4089	24.5531	24.1673	23.2846	23.5866	22.962	23.1225	23.2251	24.2446	20.9891	23.3545	24.0398	25.4229	24.2286	24.6523	23.2077	24.8472	25.2005	26.6147	24.2078	24.9299	24.1796	24.5914	24.8589	25.146	24.5027	25.2807	NaN	NaN	NaN	NaN	NaN	NaN	NaN	NaN	NaN	NaN
A0A6N4CP65	Peptidyl-prolyl cis-trans isomerase (EC 5.2.1.8)	ASJ32_08180 GO994_15345	OTHER	Cytoplasmic	O	Domain amino terminal to FKBP-type peptidyl-prolyl isomerase	Chromosome	29.1478	29.0602	29.5423	29.4901	28.9846	29.5891	29.4962	29.7186	28.1269	29.2625	27.7428	29.1391	28.8065	28.704	28.0082	29.256	26.6807	28.7999	26.7391	27.194	25.5469	26.3141	27.798	27.5358	25.8706	27.2062	25.871	26.6241	27.2784	25.8316	27.2062	27.5863	21.5236	20.2859	18.9705	19.2619	20.0983	NaN	21.0521	NaN	19.8391	20.3478
A0A6N4CP66	Tetratricopeptide repeat protein (Thioredoxin)	ASJ32_07945 GO994_15935	OTHER	Unknown	O	Tetratricopeptide repeat	Chromosome	24.0576	23.764	22.8412	22.22	22.6332	22.425	22.2724	21.7921	22.7553	21.6896	21.9359	NaN	22.8755	24.4151	22.0694	21.6692	NaN	NaN	21.6282	NaN	NaN	20.8104	NaN	NaN	NaN	NaN	NaN	NaN	NaN	NaN	NaN	NaN	NaN	NaN	NaN	NaN	NaN	NaN	NaN	NaN	NaN	NaN
A0A6N4CP72	Uncharacterized protein	ASJ32_08645	OTHER	Unknown	-	-	Chromosome	NaN	NaN	NaN	NaN	NaN	NaN	NaN	NaN	NaN	NaN	NaN	NaN	NaN	NaN	NaN	NaN	NaN	NaN	NaN	24.4449	22.8239	22.7776	23.8503	24.5087	NaN	NaN	NaN	NaN	NaN	21.7849	NaN	23.6664	17.7671	NaN	17.6039	17.6481	NaN	NaN	NaN	NaN	NaN	17.6433
A0A6N4CP75	Porin OmpAI	ompAI ASJ32_08080 GO994_15245	SP(Sec/SPI)	OuterMembrane	M	Belongs to the ompA family	Chromosome	24.905	24.7801	25.9157	25.9724	24.6464	24.3521	24.1172	25.022	25.2075	24.9469	26.5832	25.4555	24.9183	25.1573	25.58	25.3774	30.186	29.4651	30.1712	31.2688	30.0339	29.4195	29.7434	30.5159	30.0984	29.6877	29.957	29.894	28.6507	28.8347	30.0026	30.0621	26.2981	27.1884	27.4767	27.9878	27.7454	26.6179	26.1845	26.0612	27.1909	27.5805
A0A6N4CP76	General secretion pathway protein GspB (GspB family T2SS assembly factor variant ExeB)	gspB exeB ASJ32_15975 GO994_19590	OTHER	CytoplasmicMembrane	S	Type II secretion system protein B	Chromosome	NaN	NaN	NaN	NaN	NaN	NaN	NaN	NaN	NaN	NaN	NaN	NaN	NaN	NaN	NaN	NaN	26.6444	27.0316	25.6018	27.9896	26.495	26.6737	26.4678	26.601	25.8819	26.9059	26.823	27.6782	25.8825	26.3279	27.1494	27.1263	NaN	NaN	NaN	NaN	18.7256	NaN	NaN	NaN	NaN	18.6482
A0A6N4CP86	4-hydroxy-tetrahydrodipicolinate synthase (HTPA synthase) (EC 4.3.3.7)	dapA ASJ32_16050	OTHER	Cytoplasmic	E	Catalyzes the condensation of (S)-aspartate-beta- semialdehyde (S)-ASA and pyruvate to 4-hydroxy- tetrahydrodipicolinate (HTPA)	Chromosome	28.5165	28.6498	28.5842	28.2423	29.1526	28.867	29.0857	29.0707	27.6856	28.1427	27.2161	27.4771	28.8894	28.3542	27.5527	28.5356	27.2783	26.6172	27.2878	26.5454	27.6472	27.892	25.8328	26.7567	26.8364	26.9384	25.7723	26.0902	28.4881	27.9365	25.5553	24.7623	19.1702	18.7859	18.8017	18.4131	19.2778	17.2846	NaN	16.7245	NaN	17.004
A0A6N4CP87	Amino acid carrier protein (Sodium:alanine symporter)	ASJ32_08130 GO994_15295	OTHER	CytoplasmicMembrane	E	amino acid carrier protein	Chromosome	NaN	NaN	NaN	NaN	NaN	NaN	NaN	NaN	NaN	NaN	NaN	NaN	NaN	NaN	NaN	NaN	22.5303	21.842	22.3307	22.6848	23.5391	22.8706	22.6258	23.1867	23.1305	22.5755	22.5838	22.0193	21.9998	22.7196	23.0496	23.0657	NaN	18.1492	NaN	NaN	19.296	18.3051	18.9396	18.4691	18.1745	18.1528
A0A6N4CP88	Multidrug transporter AcrB	ASJ32_08045	OTHER	CytoplasmicMembrane	V	Belongs to the resistance-nodulation-cell division (RND) (TC 2.A.6) family	Chromosome	NaN	NaN	NaN	NaN	NaN	NaN	NaN	NaN	NaN	NaN	NaN	NaN	NaN	NaN	NaN	NaN	23.8577	23.2544	23.0331	24.8853	23.3357	23.5218	23.586	23.0603	22.6352	23.4401	23.1484	24.1053	23.7173	23.8452	24.2421	24.5295	NaN	NaN	NaN	NaN	NaN	NaN	NaN	NaN	NaN	NaN
A0A6N4CP91	AraC family transcriptional regulator	ASJ32_20580	OTHER	CytoplasmicMembrane	K	transcriptional regulator	Chromosome	NaN	NaN	NaN	NaN	NaN	NaN	NaN	NaN	NaN	NaN	NaN	NaN	NaN	NaN	NaN	NaN	21.9289	NaN	24.164	NaN	22.4271	NaN	NaN	24.4198	NaN	NaN	NaN	NaN	22.46	22.6278	22.274	22.9227	NaN	NaN	NaN	NaN	NaN	NaN	NaN	NaN	NaN	NaN
A0A6N4CP93	Copper homeostasis protein CutC	cutC ASJ32_08185	OTHER	Cytoplasmic	P	Participates in the control of copper homeostasis	Chromosome	NaN	21.4126	NaN	NaN	NaN	NaN	NaN	NaN	NaN	NaN	NaN	22.9884	NaN	NaN	NaN	NaN	25.7611	26.7714	24.8342	27.2233	25.2006	25.6691	25.8305	25.3549	24.3687	25.4939	25.2238	26.455	25.2288	25.0746	26.3219	25.9345	NaN	NaN	NaN	NaN	NaN	NaN	NaN	NaN	NaN	NaN
A0A6N4CPA3	LysR family transcriptional regulator	ASJ32_08240 GO994_15445	OTHER	Unknown	K	LysR substrate binding domain	Chromosome	NaN	NaN	NaN	NaN	NaN	NaN	NaN	NaN	NaN	NaN	NaN	NaN	NaN	NaN	NaN	NaN	NaN	NaN	NaN	NaN	NaN	22.1507	22.0352	21.9966	NaN	NaN	NaN	NaN	NaN	NaN	NaN	21.3981	NaN	NaN	NaN	NaN	NaN	NaN	NaN	NaN	NaN	NaN
A0A6N4CPA5	L-asparaginase (EC 3.5.1.1)	ansB ASJ32_16185	SP(Sec/SPI)	Periplasmic	EJ	Belongs to the asparaginase 1 family	Chromosome	23.1282	NaN	NaN	NaN	22.7922	NaN	23.3974	23.1481	NaN	NaN	NaN	NaN	NaN	NaN	NaN	NaN	NaN	NaN	NaN	NaN	NaN	NaN	NaN	NaN	NaN	NaN	NaN	NaN	NaN	NaN	NaN	NaN	NaN	NaN	NaN	NaN	NaN	NaN	NaN	NaN	NaN	NaN
A0A6N4CPA6	Transcriptional antiterminator	ASJ32_22185	OTHER	Cytoplasmic	-	-	Chromosome	NaN	NaN	NaN	NaN	NaN	NaN	NaN	NaN	NaN	NaN	NaN	NaN	NaN	NaN	NaN	NaN	24.3202	NaN	NaN	25.05	24.7783	24.9538	25.3319	25.2248	NaN	NaN	24.1253	NaN	24.1999	23.7763	NaN	24.0857	NaN	NaN	NaN	NaN	NaN	NaN	NaN	NaN	NaN	NaN
A0A6N4CPB4	Diguanylate cyclase	ASJ32_08055 GO994_15220	OTHER	CytoplasmicMembrane	T	diguanylate cyclase	Chromosome	NaN	NaN	NaN	NaN	NaN	NaN	NaN	NaN	NaN	NaN	NaN	NaN	NaN	NaN	NaN	NaN	21.9817	NaN	21.766	23.3083	21.9789	NaN	NaN	NaN	NaN	NaN	22.3353	NaN	NaN	NaN	22.7808	22.3169	NaN	NaN	NaN	NaN	NaN	NaN	NaN	NaN	NaN	NaN
A0A6N4CPB7	Phosphate-binding protein	ASJ32_08205	SP(Sec/SPI)	CytoplasmicMembrane	P	PBP superfamily domain	Chromosome	24.5861	25.0203	24.2105	23.0265	25.5197	25.6453	25.2058	24.8405	24.637	25.5601	24.6625	24.5909	24.0224	23.2522	22.8032	23.5345	NaN	NaN	NaN	NaN	NaN	NaN	NaN	NaN	20.6594	NaN	21.5542	NaN	NaN	NaN	NaN	NaN	NaN	NaN	NaN	NaN	NaN	NaN	NaN	NaN	NaN	NaN
A0A6N4CPB9	Chemotaxis protein CheV (Response regulator)	ASJ32_16235 GO994_19845	OTHER	Cytoplasmic	T	Two component signalling adaptor domain	Chromosome	NaN	NaN	NaN	NaN	NaN	NaN	NaN	NaN	NaN	NaN	NaN	NaN	NaN	NaN	NaN	NaN	NaN	NaN	NaN	NaN	22.0863	22.3959	22.5045	22.7071	NaN	NaN	NaN	NaN	NaN	NaN	NaN	22.0753	NaN	NaN	NaN	NaN	NaN	NaN	NaN	NaN	NaN	NaN
A0A6N4CPC5	Cell wall degradation protein	ASJ32_08345	SP(Sec/SPI)	Unknown	S	Cell wall degradation protein	Chromosome	25.5728	25.1129	26.3142	25.4834	26.5557	26.2227	26.2854	25.8512	25.1353	25.5382	25.6894	24.8321	25.1286	25.4191	24.8919	24.8989	24.6756	25.3657	25.2529	24.6415	24.4854	25.5767	24.9505	26.0333	23.9606	24.6881	24.8438	24.2386	24.7526	24.7576	25.5323	25.1439	NaN	NaN	NaN	NaN	NaN	NaN	NaN	NaN	NaN	NaN
A0A6N4CPC9	ABC_trans_aux domain-containing protein	ASJ32_16015 GO994_19630	LIPO(Sec/SPII)	Unknown	S	ABC-type transport auxiliary lipoprotein component	Chromosome	NaN	NaN	NaN	NaN	NaN	NaN	NaN	NaN	NaN	NaN	NaN	NaN	NaN	NaN	NaN	NaN	25.021	24.815	24.9768	24.5741	25.1587	24.0462	24.3213	23.8857	25.1122	24.1812	25.5029	24.7445	24.1673	24.861	23.4751	24.8266	NaN	19.2657	NaN	17.9361	19.3527	NaN	17.9941	NaN	18.9611	NaN
A0A6N4CPD0	Mobilization protein (Fragment)	ASJ32_22415	OTHER	Cytoplasmic	S	Relaxase/Mobilisation nuclease domain	Chromosome	NaN	21.3381	23.3823	NaN	NaN	NaN	NaN	NaN	NaN	NaN	23.5358	NaN	NaN	22.4226	22.7534	NaN	22.8061	23.6494	22.9874	22.4146	22.9203	23.1554	23.9056	23.8894	23.1344	23.5105	22.9426	23.8968	22.6614	22.6423	23.2943	22.689	NaN	NaN	NaN	NaN	NaN	NaN	NaN	NaN	NaN	NaN
A0A6N4CPD2	Biopolymer transporter ExbB (MotA/TolQ/ExbB proton channel family protein)	ASJ32_22000 GO994_21990	OTHER	CytoplasmicMembrane	U	COG0811 Biopolymer transport proteins	Chromosome	NaN	NaN	NaN	NaN	NaN	NaN	NaN	NaN	NaN	NaN	NaN	NaN	NaN	NaN	NaN	NaN	NaN	22.8414	NaN	NaN	24.0524	22.6571	23.52	25.6828	23.6584	NaN	24.1541	NaN	21.8929	NaN	23.0437	NaN	NaN	NaN	NaN	NaN	NaN	NaN	NaN	NaN	NaN	NaN
A0A6N4CPD4	Cell division protein ZipA	zipA ASJ32_08315	OTHER	CytoplasmicMembrane	D	Essential cell division protein that stabilizes the FtsZ protofilaments by cross-linking them and that serves as a cytoplasmic membrane anchor for the Z ring. Also required for the recruitment to the septal ring of downstream cell division proteins	Chromosome	21.9626	NaN	NaN	NaN	22.5103	NaN	20.9332	21.2209	20.8244	NaN	21.3156	NaN	22.1063	22.585	22.2602	22.9848	27.8328	28.374	27.6536	28.4947	27.8526	27.3557	27.5617	27.7976	28.3256	27.5294	28.9507	28.2841	28.1003	28.0834	28.8468	28.2023	18.6455	18.4553	16.9678	18.3467	18.4627	NaN	17.4958	NaN	19.2071	18.6317
A0A6N4CPD7	Transketolase (EC 2.2.1.1)	tkt ASJ32_08400 GO994_16825	OTHER	Cytoplasmic	G	Catalyzes the transfer of a two-carbon ketol group from a ketose donor to an aldose acceptor, via a covalent intermediate with the cofactor thiamine pyrophosphate	Chromosome	30.19	30.2343	30.1007	30.061	30.0405	30.4601	29.9382	30.2328	29.7625	29.8597	29.5523	29.8577	30.0475	30.0844	29.4673	30.0921	27.943	28.5366	28.333	27.8072	27.7061	27.9622	27.7733	28.5256	27.8563	28.0974	27.3987	28.2396	28.4847	28.8063	28.7163	28.358	18.3514	19.6338	19.4195	19.2058	17.6047	18.7868	17.8826	18.9687	NaN	19.9356
A0A6N4CPF1	Beta-lactamase (EC 3.5.2.6)	ampC ASJ32_08455	OTHER	Periplasmic	V	Beta-lactamase	Chromosome	NaN	NaN	NaN	NaN	NaN	NaN	NaN	NaN	NaN	NaN	NaN	NaN	NaN	NaN	NaN	NaN	NaN	NaN	NaN	NaN	NaN	NaN	NaN	NaN	NaN	NaN	NaN	NaN	NaN	NaN	NaN	NaN	NaN	NaN	NaN	NaN	NaN	NaN	NaN	NaN	NaN	NaN
A0A6N4CPF3	Uncharacterized protein	ASJ32_15710 GO994_18610	OTHER	Cytoplasmic	-	-	Chromosome	NaN	NaN	NaN	NaN	NaN	NaN	NaN	NaN	NaN	NaN	NaN	NaN	NaN	NaN	NaN	NaN	NaN	NaN	NaN	NaN	NaN	NaN	NaN	NaN	NaN	NaN	NaN	NaN	NaN	NaN	NaN	NaN	NaN	NaN	NaN	NaN	NaN	20.5728	19.1659	20.1922	NaN	NaN
A0A6N4CPF5	Replication protein	ASJ32_21840	OTHER	Cytoplasmic	S	Bacteriophage replication gene A protein (GPA)	Chromosome	NaN	22.2417	NaN	NaN	NaN	NaN	NaN	NaN	NaN	NaN	NaN	NaN	NaN	NaN	24.1484	NaN	22.4239	21.1472	21.5955	23.7624	23.6276	21.1765	24.148	23.5678	23.2981	21.7158	22.5403	23.7684	20.3844	20.8348	NaN	22.6853	NaN	NaN	NaN	NaN	NaN	NaN	NaN	NaN	NaN	NaN
A0A6N4CPF7	Sulfur relay protein TusC/DsrF (Sulfurtransferase complex subunit TusC)	tusC ASJ32_07290 GO994_01705	OTHER	Unknown	P	Belongs to the DsrF TusC family	Chromosome	NaN	NaN	NaN	NaN	NaN	NaN	NaN	NaN	NaN	NaN	NaN	NaN	NaN	NaN	NaN	NaN	22.2683	NaN	NaN	NaN	21.4479	NaN	NaN	NaN	NaN	NaN	NaN	NaN	21.5439	21.5392	NaN	21.7845	NaN	NaN	NaN	NaN	NaN	NaN	NaN	NaN	NaN	NaN
A0A6N4CPF8	Uncharacterized protein	ASJ32_20005	OTHER	CytoplasmicMembrane	P	Integral membrane protein TerC family	Chromosome	NaN	NaN	NaN	NaN	NaN	NaN	NaN	NaN	NaN	NaN	NaN	NaN	NaN	NaN	NaN	NaN	23.8326	NaN	23.1866	23.6763	24.0565	23.0351	NaN	22.9622	23.9879	23.4182	24.447	23.7152	23.2479	23.3708	23.7633	23.4142	NaN	NaN	NaN	NaN	NaN	NaN	NaN	NaN	NaN	NaN
A0A6N4CPG0	Transaldolase (EC 2.2.1.2)	tal ASJ32_08480	OTHER	Cytoplasmic	H	Transaldolase is important for the balance of metabolites in the pentose-phosphate pathway	Chromosome	27.8562	28.4281	28.1603	27.6968	28.484	28.6706	28.7562	28.2232	27.1741	27.6146	26.439	27.3847	27.8975	27.2777	26.3544	27.8543	22.3725	22.6216	NaN	23.0513	22.2968	22.5402	23.3901	23.0965	22.7932	22.6735	22.9804	23.4514	NaN	22.193	22.6004	23.474	NaN	NaN	NaN	NaN	NaN	NaN	NaN	NaN	NaN	NaN
A0A6N4CPG1	Transcription termination/antitermination protein NusG	nusG ASJ32_07340 GO994_01655	OTHER	Cytoplasmic	K	Participates in transcription elongation, termination and antitermination	Chromosome	29.0657	28.3874	29.3268	29.421	29.0388	28.2011	28.8146	28.9924	29.1252	29.1638	29.3138	29.2512	28.7666	28.5757	29.1853	29.0221	28.5382	28.5747	28.5366	28.3875	28.75	28.9672	29.7655	28.8968	28.2322	29.8412	28.121	29.3446	28.8377	28.0155	29.0742	28.9987	21.3442	20.9972	20.2687	20.7889	20.516	20.6475	22.843	NaN	22.0762	22.184
A0A6N4CPG4	Uncharacterized protein	ASJ32_06670	OTHER	CytoplasmicMembrane	-	-	Chromosome	NaN	NaN	NaN	NaN	NaN	NaN	NaN	NaN	NaN	NaN	NaN	NaN	NaN	NaN	NaN	NaN	23.3629	NaN	22.2056	23.2849	22.6729	22.0993	22.3548	NaN	22.2305	23.3688	23.2529	23.1575	22.6896	NaN	NaN	23.1159	NaN	NaN	NaN	NaN	NaN	NaN	NaN	NaN	NaN	NaN
A0A6N4CPG5	PilT/PilU family type 4a pilus ATPase (Type IV pili twitching motility protein PilT)	ASJ32_15760 GO994_18665	OTHER	Cytoplasmic	NU	Type II/IV secretion system protein	Chromosome	NaN	21.5697	NaN	NaN	NaN	23.0244	20.3897	22.118	NaN	NaN	NaN	NaN	21.4407	NaN	NaN	NaN	24.5396	25.207	23.9465	24.7018	24.6788	25.6604	24.9743	25.6343	22.9543	24.2528	22.8515	24.1343	23.726	23.5882	25.1478	24.4985	NaN	NaN	NaN	NaN	NaN	NaN	NaN	NaN	NaN	NaN
A0A6N4CPG7	Amino acid carrier protein (Sodium:alanine symporter)	ASJ32_08475 GO994_16915	OTHER	CytoplasmicMembrane	E	Sodium:alanine symporter family	Chromosome	21.5906	NaN	NaN	22.657	21.3842	NaN	NaN	20.9806	NaN	NaN	NaN	NaN	NaN	NaN	NaN	23.1179	28.1449	27.2278	27.7002	28.4425	28.0853	27.0598	26.5229	27.2765	28.1224	27.1191	27.8256	28.2987	27.2765	28.086	26.6232	27.7976	24.8945	22.4581	23.6096	24.062	24.0944	21.2403	23.0267	22.7204	24.8569	22.7708
A0A6N4CPG9	Trimethylamine-N-oxide reductase (EC 1.7.2.3)	ASJ32_07405	TAT(Tat/SPI)	Periplasmic	C	Molydopterin dinucleotide binding domain	Chromosome	24.4442	24.1834	25.6574	24.6538	24.2116	25.204	24.2905	24.5605	25.6677	25.2346	25.2727	25.1894	22.8198	22.9255	24.1854	25.2769	23.9499	25.3979	24.952	25.5572	23.9795	24.4628	24.3373	25.6612	24.6985	24.9205	25.0914	25.6937	NaN	NaN	NaN	NaN	NaN	NaN	NaN	NaN	NaN	NaN	NaN	NaN	NaN	NaN
A0A6N4CPH1	Terminase	ASJ32_22735	OTHER	Unknown	L	Phage small terminase subunit	Chromosome	NaN	NaN	NaN	NaN	NaN	NaN	NaN	NaN	NaN	NaN	NaN	NaN	NaN	NaN	NaN	NaN	NaN	NaN	NaN	NaN	21.1354	NaN	NaN	NaN	NaN	NaN	NaN	NaN	NaN	NaN	NaN	20.3712	NaN	NaN	NaN	NaN	NaN	NaN	NaN	NaN	NaN	NaN
A0A6N4CPH2	Succinate dehydrogenase hydrophobic membrane anchor subunit	sdhD ASJ32_06720 GO994_10835	OTHER	CytoplasmicMembrane	C	Membrane-anchoring subunit of succinate dehydrogenase (SDH)	Chromosome	NaN	NaN	NaN	NaN	NaN	NaN	NaN	NaN	NaN	NaN	NaN	NaN	NaN	NaN	NaN	NaN	24.2454	26.425	25.1629	26.0486	23.6072	22.2656	21.8279	NaN	25.1841	24.5275	26.3805	25.3415	25.0523	25.9518	26.8572	25.4668	18.2838	NaN	18.4262	18.352	17.9089	NaN	NaN	17.5162	20.2824	18.3483
A0A6N4CPH4	DUF2753 family protein	ASJ32_15810 GO994_18715	OTHER	Unknown	S	Protein of unknown function (DUF2753)	Chromosome	NaN	NaN	NaN	NaN	20.0768	20.2725	21.5012	NaN	NaN	NaN	NaN	NaN	NaN	NaN	NaN	NaN	NaN	NaN	NaN	NaN	24.2004	23.9965	25.003	23.4901	NaN	NaN	NaN	NaN	NaN	NaN	NaN	NaN	NaN	NaN	NaN	NaN	NaN	NaN	NaN	NaN	NaN	NaN
A0A6N4CPH6	Uncharacterized protein	ASJ32_22520	OTHER	Cytoplasmic	S	Phage regulatory protein CII (CP76)	Chromosome	NaN	NaN	NaN	NaN	NaN	NaN	NaN	NaN	NaN	NaN	NaN	NaN	NaN	NaN	NaN	NaN	NaN	NaN	22.0824	23.7504	23.3672	23.603	23.3475	24.0174	NaN	NaN	NaN	24.0204	NaN	NaN	NaN	NaN	NaN	NaN	NaN	NaN	NaN	NaN	NaN	NaN	NaN	NaN
A0A6N4CPH8	Uncharacterized protein	ASJ32_07455 GO994_01535	LIPO(Sec/SPII)	Unknown	-	-	Chromosome	NaN	NaN	NaN	NaN	NaN	NaN	NaN	NaN	NaN	NaN	NaN	NaN	NaN	NaN	NaN	NaN	26.2459	24.7892	26.3184	26.707	26.0347	25.9849	26.5026	26.5036	25.5793	25.5328	26.2417	26.9395	26.2845	25.8733	26.6853	26.5168	NaN	NaN	NaN	NaN	15.2299	NaN	NaN	NaN	NaN	NaN
A0A6N4CPI0	Uncharacterized protein	ASJ32_19900	OTHER	CytoplasmicMembrane	-	-	Chromosome	NaN	NaN	NaN	NaN	NaN	NaN	NaN	NaN	NaN	NaN	NaN	NaN	NaN	NaN	NaN	NaN	25.2218	20.2019	25.2125	25.4654	25.9365	25.0513	24.7225	24.7408	26.059	25.5327	26.2868	25.8527	24.7042	25.1057	25.257	24.9948	NaN	NaN	NaN	NaN	NaN	NaN	NaN	NaN	NaN	NaN
A0A6N4CPI2	DEAD/DEAH box helicase	ASJ32_15865 GO994_03170	OTHER	Cytoplasmic	L	DEAD-box RNA helicase involved in ribosome assembly. Has RNA-dependent ATPase activity and unwinds double-stranded RNA	Chromosome	22.192	21.3194	21.4059	23.7887	23.3935	NaN	21.515	20.7763	20.3004	20.0397	21.7731	21.5695	21.1653	NaN	NaN	22.8672	24.3264	24.7116	24.0675	23.661	23.7281	24.6777	24.7588	24.4916	23.9842	24.5432	23.5249	24.4326	24.1156	23.5925	21.9215	24.3444	19.9406	19.6406	19.5869	18.9194	NaN	NaN	18.0889	NaN	18.1834	19.107
A0A6N4CPI3	Aspartate-semialdehyde dehydrogenase (ASA dehydrogenase) (ASADH) (EC 1.2.1.11) (Aspartate-beta-semialdehyde dehydrogenase)	asd ASJ32_06775 GO994_10890	OTHER	Cytoplasmic	E	Catalyzes the NADPH-dependent formation of L-aspartate- semialdehyde (L-ASA) by the reductive dephosphorylation of L- aspartyl-4-phosphate	Chromosome	27.8455	28.4836	28.4575	28.1269	29.1139	29.1861	29.314	29.575	27.3124	27.9532	27.2769	27.8702	28.4293	28.3066	27.3946	28.4293	24.9773	24.2035	24.867	25.2125	25.419	25.1296	25.413	26.0236	24.6084	24.722	24.074	24.1959	24.9699	24.8846	24.5823	25.1219	NaN	NaN	NaN	NaN	NaN	NaN	NaN	NaN	NaN	NaN
A0A6N4CPI4	Pseudouridine synthase (EC 5.4.99.-)	rluD ASJ32_07505	OTHER	Cytoplasmic	J	Responsible for synthesis of pseudouridine from uracil	Chromosome	26.0432	26.044	26.3381	26.5033	25.7462	26.1202	26.0831	25.689	25.7807	26.0064	26.3034	26.6648	26.1482	26.0594	24.7926	26.224	26.9442	26.7129	27.1735	26.259	27.3542	27.0903	26.9844	26.4737	27.5805	27.5738	26.2395	27.0664	26.5437	26.0167	25.0464	25.7074	NaN	17.8599	16.9806	18.2334	20.0577	NaN	18.7144	NaN	NaN	20.102
A0A6N4CPI7	Nucleoside-diphosphate sugar epimerase	ASJ32_19955	OTHER	CytoplasmicMembrane	GM	CoA-binding domain	Chromosome	NaN	NaN	NaN	NaN	NaN	NaN	NaN	NaN	24.8811	24.3879	24.213	NaN	NaN	NaN	NaN	NaN	24.2748	22.2221	24.2124	23.7235	24.4659	24.5707	23.7913	23.1934	25.1068	24.7676	25.0771	25.2326	23.6395	24.2159	24.6107	23.6826	NaN	NaN	NaN	NaN	NaN	NaN	NaN	NaN	NaN	NaN
A0A6N4CPI9	5-methyltetrahydropteroyltriglutamate--homocysteine methyltransferase (EC 2.1.1.14) (Cobalamin-independent methionine synthase) (Methionine synthase, vitamin-B12 independent isozyme)	metE ASJ32_06830	OTHER	Cytoplasmic	E	Catalyzes the transfer of a methyl group from 5- methyltetrahydrofolate to homocysteine resulting in methionine formation	Chromosome	28.616	28.8779	28.7102	28.1076	29.2664	28.9346	29.1183	28.68	27.5714	27.0861	26.2399	27.2192	29.9604	30.0588	27.8443	29.2386	27.5435	26.2342	27.5574	27.0032	27.8081	27.8495	27.5245	27.8464	26.9337	26.6806	26.3494	26.248	29.0603	28.6644	27.3165	28.3783	NaN	NaN	NaN	NaN	NaN	NaN	16.6802	18.7918	NaN	NaN
A0A6N4CPJ0	2-nitropropane dioxygenase	ASJ32_15915	OTHER	Cytoplasmic	S	2-nitropropane dioxygenase	Chromosome	22.8033	22.1017	NaN	20.1309	22.8856	22.6461	22.8764	22.4474	NaN	NaN	NaN	NaN	21.8733	21.3171	NaN	21.0664	NaN	NaN	NaN	NaN	NaN	NaN	NaN	NaN	NaN	NaN	NaN	NaN	NaN	NaN	NaN	NaN	NaN	NaN	NaN	NaN	NaN	NaN	NaN	NaN	NaN	NaN
A0A6N4CPJ3	Outer membrane lipoprotein Blc	ASJ32_07560	LIPO(Sec/SPII)	OuterMembrane	M	Lipocalin-like domain	Chromosome	NaN	NaN	NaN	NaN	NaN	NaN	NaN	NaN	NaN	NaN	NaN	NaN	NaN	NaN	NaN	NaN	24.6737	22.1959	24.4489	24.8541	25.3786	25.069	25.4112	25.2356	24.5907	23.3207	24.5267	24.4622	24.0584	24.4618	24.4011	25.0402	NaN	NaN	NaN	NaN	NaN	NaN	NaN	NaN	NaN	NaN
A0A6N4CPJ4	Uncharacterized protein	ASJ32_08560	OTHER	Cytoplasmic	S	P2 phage tail completion protein R (GpR)	Chromosome	NaN	NaN	NaN	NaN	NaN	NaN	NaN	NaN	NaN	NaN	NaN	NaN	NaN	NaN	NaN	NaN	NaN	NaN	NaN	NaN	NaN	NaN	NaN	NaN	NaN	NaN	NaN	NaN	NaN	NaN	NaN	NaN	NaN	NaN	NaN	NaN	NaN	NaN	NaN	NaN	NaN	NaN
A0A6N4CPK0	Hydrolase TatD	ASJ32_15270	OTHER	Cytoplasmic	L	TatD related DNase	Chromosome	NaN	23.1686	22.8786	22.8826	22.2357	24.0365	23.198	23.1703	22.5679	23.9457	NaN	NaN	23.196	NaN	21.9706	22.898	23.9048	24.6056	23.0592	23.9822	24.6543	23.8186	24.83	23.6457	22.937	24.1723	22.5009	23.8382	23.7658	23.1979	24.4262	23.792	NaN	18.4495	NaN	NaN	NaN	NaN	NaN	NaN	NaN	NaN
A0A6N4CPK2	Alpha-amylase (EC 3.2.1.1)	ASJ32_07990	SP(Sec/SPI)	Extracellular	G	alpha-amylase	Chromosome	NaN	NaN	NaN	NaN	NaN	NaN	NaN	NaN	NaN	NaN	NaN	NaN	NaN	NaN	NaN	NaN	NaN	NaN	NaN	NaN	NaN	NaN	22.7488	NaN	21.279	NaN	NaN	NaN	NaN	NaN	NaN	NaN	NaN	NaN	NaN	NaN	NaN	NaN	NaN	NaN	NaN	NaN
A0A6N4CPK5	Homoserine O-succinyltransferase (HST) (EC 2.3.1.46) (Homoserine transsuccinylase) (HTS)	metA metAS ASJ32_05260 GO994_19345	OTHER	Cytoplasmic	E	Transfers a succinyl group from succinyl-CoA to L- homoserine, forming succinyl-L-homoserine	Chromosome	23.4382	20.8182	21.4597	22.1698	24.4722	22.5749	23.1807	22.949	21.1071	21.8572	NaN	21.1765	21.404	22.7756	NaN	23.1907	24.8145	23.8775	24.2729	23.6577	24.7386	25.039	25.5982	25.2385	23.4391	25.0833	23.3852	24.3701	25.2005	24.7276	25.2304	25.863	NaN	NaN	NaN	NaN	NaN	NaN	NaN	NaN	NaN	NaN
A0A6N4CPK7	Zinc chelation protein SecC	ASJ32_06930	OTHER	Unknown	S	SEC-C motif	Chromosome	NaN	NaN	NaN	NaN	19.9033	NaN	NaN	NaN	NaN	NaN	NaN	NaN	NaN	NaN	NaN	20.3703	22.4496	NaN	NaN	23.8125	21.531	NaN	22.0596	22.6511	NaN	NaN	NaN	22.1009	22.1072	21.6441	21.8036	22.8489	NaN	NaN	NaN	NaN	NaN	NaN	NaN	NaN	NaN	NaN
A0A6N4CPK9	Transcription termination factor Rho (EC 3.6.4.-) (ATP-dependent helicase Rho)	rho ASJ32_15320 GO994_21850	OTHER	Cytoplasmic	K	Facilitates transcription termination by a mechanism that involves Rho binding to the nascent RNA, activation of Rho's RNA-dependent ATPase activity, and release of the mRNA from the DNA template	Chromosome	26.0254	25.1847	26.0413	27.2051	25.7817	25.3783	25.4691	25.5624	25.4662	25.504	26.7003	26.5455	26.0645	26.2155	26.5238	26.5507	29.2677	29.0395	29.0206	30.0014	29.142	28.8483	29.5892	29.6605	29.1562	29.1258	29.1916	29.5237	29.0446	28.8565	29.0815	29.6663	20.0813	20.5955	20.1793	20.0595	21.209	19.4146	20.6244	19.3696	19.3189	20.6704
A0A6N4CPL1	Repressor	ASJ32_08665	OTHER	Unknown	KT	Peptidase S24-like	Chromosome	22.1511	21.9789	21.4298	NaN	23.008	NaN	22.9286	22.3456	22.2532	23.1821	21.9949	NaN	22.2387	22.0342	22.0413	23.2396	NaN	NaN	NaN	NaN	NaN	NaN	NaN	NaN	NaN	NaN	NaN	NaN	NaN	NaN	NaN	NaN	NaN	NaN	NaN	NaN	NaN	NaN	NaN	NaN	NaN	NaN
A0A6N4CPL8	Protein translocase subunit SecE	secE ASJ32_07345 GO994_01650	OTHER	CytoplasmicMembrane	U	Essential subunit of the Sec protein translocation channel SecYEG. Clamps together the 2 halves of SecY. May contact the channel plug during translocation	Chromosome	NaN	NaN	NaN	NaN	NaN	NaN	NaN	NaN	NaN	NaN	NaN	NaN	NaN	NaN	NaN	NaN	25.9951	NaN	26.8637	26.3307	24.8045	25.7247	23.813	24.473	26.7123	24.6063	26.2785	25.1108	25.5073	26.0023	26.1044	25.4038	NaN	NaN	NaN	NaN	NaN	NaN	NaN	NaN	NaN	NaN
A0A6N4CPM0	NAD-dependent malic enzyme (NAD-ME) (EC 1.1.1.38)	maeA ASJ32_08095	OTHER	Cytoplasmic	C	malic enzyme activity	Chromosome	29.029	29.3392	29.5704	28.8046	28.8831	29.0465	28.5528	29.0698	29.3896	29.4013	29.1545	29.0968	29.3423	29.5054	29.4895	28.7075	24.788	24.4269	25.063	24.2758	24.5669	24.2775	23.9265	24.3817	25.1916	25.2356	25.0266	24.6108	25.0826	26.2329	25.0468	24.5182	NaN	19.209	NaN	NaN	NaN	NaN	NaN	NaN	NaN	19.6686
A0A6N4CPM2	High-affinity branched-chain amino acid transport ATP-binding protein	livF ASJ32_15370	OTHER	CytoplasmicMembrane	P	Belongs to the ABC transporter superfamily	Chromosome	NaN	NaN	NaN	NaN	NaN	NaN	NaN	NaN	NaN	NaN	NaN	NaN	NaN	NaN	NaN	NaN	21.8983	NaN	21.7565	23.0932	21.6536	NaN	22.7632	22.7132	NaN	22.1727	21.1897	NaN	22.1646	21.7737	21.7873	22.6311	NaN	NaN	NaN	NaN	NaN	NaN	NaN	NaN	NaN	NaN
A0A6N4CPM6	HAAAP family serine/threonine permease (Serine/threonine protein kinase)	ASJ32_07040 GO994_11970	OTHER	CytoplasmicMembrane	E	Tryptophan/tyrosine permease family	Chromosome	NaN	NaN	NaN	NaN	NaN	NaN	NaN	NaN	NaN	NaN	NaN	NaN	NaN	NaN	NaN	NaN	27.1374	28.1201	27.0185	28.3345	26.0042	25.4737	26.6729	26.8904	26.6319	26.3349	27.1644	26.7975	27.3439	27.3506	28.2446	27.7982	20.9858	21.0411	20.4332	21.3248	19.8411	19.4908	20.7755	20.4153	20.7468	20.7136
A0A6N4CPN0	DNA-directed RNA polymerase subunit beta (RNAP subunit beta) (EC 2.7.7.6) (RNA polymerase subunit beta) (Transcriptase subunit beta)	rpoB ASJ32_07315	OTHER	Cytoplasmic	K	DNA-dependent RNA polymerase catalyzes the transcription of DNA into RNA using the four ribonucleoside triphosphates as substrates	Chromosome	30.0566	30.3169	30.0705	30.0388	29.6014	29.7085	29.4896	29.7244	30.4257	29.9446	30.7299	30.1905	30.2187	30.4121	31.1035	29.7963	29.274	29.3102	30.3154	29.1045	29.5692	29.5856	29.2267	29.7242	30.5391	29.7057	30.327	29.6798	30.1575	30.4386	29.986	29.0192	23.0485	22.7987	23.7876	23.6649	22.0705	22.3125	21.5455	23.1076	23.663	23.4584
A0A6N4CPN1	Glutathione-dependent peroxiredoxin (EC 1.11.1.27)	ASJ32_08145 GO994_15310	OTHER	CytoplasmicMembrane	O	Peroxiredoxin	Chromosome	22.5674	22.5923	22.7044	22.3893	23.8612	NaN	23.63	22.3502	NaN	NaN	NaN	NaN	NaN	21.7968	NaN	NaN	22.5987	NaN	22.6843	NaN	22.3172	22.9636	22.7124	22.2228	22.1362	22.5991	22.7388	21.1512	20.955	22.6892	NaN	21.3558	NaN	NaN	NaN	NaN	NaN	NaN	NaN	NaN	NaN	NaN
A0A6N4CPN3	Molecular chaperone	ASJ32_05425	SP(Sec/SPI)	Periplasmic	M	COG3121 P pilus assembly protein, chaperone PapD	Chromosome	21.3746	21.9102	23.3465	21.7776	21.4408	NaN	22.3795	22.0178	22.0609	21.9364	22.7405	NaN	21.511	21.6687	21.6552	21.4259	NaN	NaN	NaN	NaN	NaN	NaN	NaN	NaN	NaN	NaN	NaN	NaN	NaN	NaN	NaN	NaN	NaN	NaN	NaN	NaN	NaN	NaN	NaN	NaN	NaN	NaN
A0A6N4CPN5	Histidine kinase (EC 2.7.13.3)	ASJ32_07460	OTHER	CytoplasmicMembrane	T	Histidine kinase	Chromosome	NaN	NaN	NaN	NaN	NaN	NaN	NaN	NaN	NaN	NaN	NaN	NaN	NaN	NaN	NaN	NaN	24.8691	22.9856	24.623	24.9711	25.1828	25.127	24.7015	24.7933	24.6223	24.0103	24.8695	24.6682	24.8802	25.0318	25.9278	25.2816	NaN	NaN	NaN	NaN	NaN	NaN	NaN	NaN	NaN	NaN
A0A6N4CPN8	DUF2846 domain-containing protein	ASJ32_15470	LIPO(Sec/SPII)	Unknown	S	Protein of unknown function (DUF2846)	Chromosome	NaN	NaN	NaN	NaN	NaN	NaN	NaN	NaN	NaN	NaN	NaN	NaN	NaN	NaN	NaN	NaN	24.5561	24.3825	24.7016	25.0641	25.5326	24.7387	24.9362	24.7153	24.5127	24.0882	24.5283	24.8997	24.8365	25.4016	26.1561	25.4191	NaN	NaN	NaN	NaN	15.2137	NaN	15.0308	NaN	NaN	NaN
A0A6N4CPN9	UDP-N-acetylenolpyruvoylglucosamine reductase (EC 1.3.1.98) (UDP-N-acetylmuramate dehydrogenase)	murB ASJ32_07380	OTHER	Cytoplasmic	M	Cell wall formation	Chromosome	22.8624	23.4828	23.7819	23.0818	23.2414	NaN	23.0553	NaN	23.2454	NaN	NaN	NaN	23.4994	23.727	NaN	NaN	22.0793	NaN	22.7096	NaN	22.0118	NaN	NaN	NaN	22.4271	NaN	22.3431	22.2053	NaN	22.5977	NaN	NaN	NaN	NaN	NaN	NaN	NaN	NaN	NaN	NaN	NaN	NaN
A0A6N4CPP0	Phage tail protein	ASJ32_08550	OTHER	Unknown	S	Protein of unknown function (DUF2586)	Chromosome	NaN	NaN	NaN	NaN	NaN	NaN	NaN	20.6101	21.8564	NaN	NaN	NaN	21.6711	NaN	NaN	NaN	25.2356	25.401	24.8351	24.1594	24.1095	23.8325	23.8672	23.2026	24.6299	23.2152	24.8382	24.7692	24.159	25.0717	25.5806	25.0303	23.6741	24.0942	24.1825	23.4936	24.7953	24.0206	24.2207	23.7189	22.0904	23.5482
A0A6N4CPP1	Outer membrane protein assembly factor BamD	bamD ASJ32_07510	LIPO(Sec/SPII)	Unknown	M	Part of the outer membrane protein assembly complex, which is involved in assembly and insertion of beta-barrel proteins into the outer membrane	Chromosome	22.5643	21.978	21.9249	23.2551	22.5478	NaN	NaN	21.6741	NaN	NaN	23.9526	NaN	22.2827	22.3905	23.1778	NaN	27.4497	26.031	27.746	27.6039	27.1109	26.9733	26.8623	26.8393	28.4045	26.7094	28.2074	27.5088	26.8061	27.1227	27.5904	27.1307	NaN	NaN	NaN	NaN	NaN	NaN	NaN	NaN	NaN	NaN
A0A6N4CPP2	M48 family metalloprotease (Peptidase)	ASJ32_08200 GO994_15365	LIPO(Sec/SPII)	Unknown	M	Peptidase family M48	Chromosome	22.9282	21.3718	23.3229	23.3529	23.0443	23.4415	22.3414	23.2401	22.196	24.2343	23.2656	23.9543	21.8952	22.1666	NaN	23.1225	25.5395	26.4283	25.837	26.513	26.4344	26.1164	26.0972	25.8361	25.6156	25.696	26.1221	25.7471	25.6313	25.8591	26.6483	26.319	NaN	19.6896	19.1532	19.8431	20.2449	20.9079	21.8722	20.3266	20.3523	NaN
A0A6N4CPQ1	Uncharacterized protein	ASJ32_08600	OTHER	Cytoplasmic	S	Protein of unknown function (DUF2971)	Chromosome	NaN	NaN	NaN	NaN	NaN	NaN	NaN	NaN	22.2247	NaN	NaN	23.104	22.3107	NaN	23.3985	NaN	23.7617	24.9754	24.6454	24.1978	23.755	23.6552	23.9631	23.029	24.1544	23.4203	23.7046	23.9193	23.2416	23.3621	23.8827	24.3735	NaN	NaN	NaN	NaN	NaN	NaN	NaN	NaN	NaN	NaN
A0A6N4CPQ5	Malate dehydrogenase	ASJ32_08255	OTHER	Cytoplasmic	C	malic enzyme activity	Chromosome	NaN	NaN	NaN	NaN	NaN	NaN	NaN	NaN	NaN	NaN	NaN	NaN	NaN	NaN	NaN	NaN	NaN	NaN	NaN	21.6947	22.2277	21.744	22.9007	22.6435	NaN	NaN	NaN	NaN	NaN	NaN	NaN	22.1599	NaN	NaN	NaN	NaN	NaN	NaN	NaN	NaN	NaN	NaN
A0A6N4CPQ8	Acetyltransferase (GCN5 family acetyltransferase)	ASJ32_07195 GO994_11165	OTHER	Cytoplasmic	K	FR47-like protein	Chromosome	NaN	NaN	NaN	NaN	NaN	NaN	NaN	NaN	NaN	NaN	NaN	NaN	NaN	NaN	NaN	NaN	NaN	NaN	NaN	NaN	20.595	20.4457	22.1481	NaN	NaN	NaN	NaN	NaN	NaN	NaN	NaN	NaN	NaN	NaN	NaN	NaN	NaN	NaN	NaN	NaN	NaN	NaN
A0A6N4CPQ9	ABC transporter substrate-binding protein (Transporter substrate-binding domain-containing protein)	ASJ32_07535 GO994_01445	SP(Sec/SPI)	Unknown	ET	COG0834 ABC-type amino acid transport signal transduction systems periplasmic component domain	Chromosome	NaN	NaN	NaN	NaN	NaN	NaN	NaN	NaN	NaN	NaN	NaN	NaN	NaN	NaN	NaN	NaN	NaN	NaN	NaN	NaN	NaN	NaN	NaN	NaN	NaN	NaN	NaN	NaN	NaN	NaN	NaN	NaN	NaN	NaN	NaN	NaN	NaN	NaN	NaN	NaN	NaN	NaN
A0A6N4CPR0	Uncharacterized protein	ASJ32_22165 GO994_11335	OTHER	Cytoplasmic	-	-	Chromosome	22.5	21.7557	NaN	NaN	22.9623	23.3551	21.9858	22.3572	24.5435	22.9778	23.8443	22.1344	22.6134	23.2223	22.0278	21.235	NaN	NaN	22.0879	NaN	21.6585	22.0853	21.9528	NaN	22.728	22.8102	21.7987	22.9483	NaN	21.8261	NaN	21.783	NaN	NaN	NaN	NaN	NaN	NaN	NaN	NaN	NaN	NaN
A0A6N4CPR3	DNA ligase (EC 6.5.1.2) (Polydeoxyribonucleotide synthase [NAD(+)])	ligA ASJ32_08310	OTHER	Cytoplasmic	L	DNA ligase that catalyzes the formation of phosphodiester linkages between 5'-phosphoryl and 3'-hydroxyl groups in double-stranded DNA using NAD as a coenzyme and as the energy source for the reaction. It is essential for DNA replication and repair of damaged DNA	Chromosome	23.377	22.5439	23.6334	23.6145	22.9295	23.1876	23.2435	22.8363	22.893	23.4363	23.2716	23.3545	23.1384	23.1581	23.6757	24.2167	25.6778	25.9161	25.0272	25.6936	25.3599	25.0755	25.6187	25.5256	24.9952	25.4496	25.5707	25.438	25.1682	25.1417	25.981	25.8526	NaN	NaN	NaN	NaN	NaN	NaN	NaN	NaN	NaN	16.2679
A0A6N4CPR4	Cobalamin biosynthesis protein CobW	ASJ32_14935	OTHER	Cytoplasmic	S	Cobalamin synthesis protein cobW C-terminal domain	Chromosome	21.897	20.5566	21.6306	21.9219	23.1951	19.5327	21.6522	20.7008	20.6641	20.7051	NaN	21.3461	21.3528	NaN	NaN	20.9171	25.6684	25.1799	25.0517	25.5293	25.0044	25.3109	26.2362	25.2326	24.7345	25.1174	24.6586	24.9561	25.1885	24.6316	25.4268	25.5453	NaN	NaN	NaN	NaN	NaN	NaN	NaN	NaN	NaN	NaN
A0A6N4CPR7	Aspartate carbamoyltransferase regulatory chain	pyrI ASJ32_07590	OTHER	Cytoplasmic	F	Involved in allosteric regulation of aspartate carbamoyltransferase	Chromosome	26.1169	26.4187	26.1146	25.7635	25.2384	25.1017	25.4998	25.462	26.57	25.6034	26.6869	25.5863	26.2976	25.824	26.139	25.6306	26.7878	25.5798	27.3541	26.6488	26.8184	26.1643	25.6056	26.2176	27.3278	26.7179	27.496	26.4371	27.4256	27.4399	25.965	26.5742	NaN	18.7407	19.2092	NaN	17.6477	17.1928	NaN	17.7334	18.147	19.5744
A0A6N4CPS1	Transcriptional regulator	ASJ32_07690 GO994_20945	OTHER	Unknown	T	ChrR Cupin-like domain	Chromosome	NaN	NaN	NaN	NaN	NaN	NaN	NaN	NaN	NaN	NaN	NaN	NaN	NaN	NaN	NaN	NaN	NaN	NaN	NaN	NaN	22.5564	21.9439	22.9842	NaN	NaN	NaN	NaN	NaN	NaN	NaN	NaN	NaN	NaN	NaN	NaN	NaN	NaN	NaN	NaN	NaN	NaN	NaN
A0A6N4CPS3	Uncharacterized protein	ASJ32_14990 GO994_02495	LIPO(Sec/SPII)	Unknown	-	-	Chromosome	NaN	NaN	NaN	NaN	NaN	NaN	NaN	NaN	NaN	NaN	NaN	NaN	NaN	NaN	NaN	NaN	NaN	24.9965	NaN	24.1854	22.5439	NaN	NaN	23.9268	NaN	NaN	NaN	NaN	NaN	NaN	NaN	NaN	NaN	NaN	NaN	NaN	NaN	NaN	NaN	NaN	NaN	NaN
A0A6N4CPS7	Protein TonB	ASJ32_21990 GO994_21980	OTHER	Unknown	U	Interacts with outer membrane receptor proteins that carry out high-affinity binding and energy dependent uptake into the periplasmic space of specific substrates. It could act to transduce energy from the cytoplasmic membrane to specific energy- requiring processes in the outer membrane, resulting in the release into the periplasm of ligands bound by these outer membrane proteins	Chromosome	NaN	NaN	NaN	NaN	NaN	NaN	NaN	NaN	NaN	NaN	NaN	NaN	NaN	NaN	NaN	NaN	24.5311	23.645	23.6012	23.0631	26.6427	25.7195	26.2801	25.0516	22.5814	22.3632	23.8262	21.4841	23.0956	23.7292	23.9174	22.7206	NaN	NaN	NaN	NaN	NaN	NaN	NaN	NaN	NaN	NaN
A0A6N4CPT1	Transcriptional regulator	ASJ32_07655	OTHER	Cytoplasmic	K	Transcriptional regulator	Chromosome	21.7097	21.4873	22.5799	23.0255	21.5338	21.7971	22.7875	21.744	21.6386	23.2175	22.3562	23.0658	21.2294	21.9419	21.809	23.2138	24.2153	25.9327	24.9331	24.5144	24.7042	24.1655	24.7604	24.7934	24.7325	24.6249	24.3116	25.2595	24.2585	24.1794	24.1878	24.4707	NaN	NaN	NaN	NaN	NaN	NaN	NaN	NaN	NaN	NaN
A0A6N4CPT2	Prepilin leader peptidase/N-methyltransferase (EC 2.1.1.-) (EC 3.4.23.43)	ASJ32_15045 GO994_02435	OTHER	CytoplasmicMembrane	M	Cleaves type-4 fimbrial leader sequence and methylates the N-terminal (generally Phe) residue	Chromosome	NaN	NaN	NaN	NaN	NaN	NaN	NaN	NaN	NaN	NaN	NaN	NaN	NaN	NaN	NaN	NaN	24.3152	NaN	24.8533	25.7018	24.7506	22.5254	23.7988	24.4459	24.8095	22.4391	25.0044	25.7391	25.2809	25.5431	25.1088	24.9768	NaN	NaN	NaN	NaN	NaN	NaN	NaN	NaN	NaN	NaN
A0A6N4CPT3	Type II secretion system core protein G	gspG exeG ASJ32_05675 GO994_20140	OTHER	CytoplasmicMembrane	U	general secretion pathway protein G	Chromosome	NaN	NaN	NaN	NaN	NaN	NaN	NaN	NaN	NaN	NaN	NaN	NaN	NaN	NaN	NaN	NaN	25.4516	NaN	26.1117	24.62	25.1017	24.5336	24.8665	23.9851	24.0329	23.3006	24.405	24.4173	25.1082	25.2574	23.556	25.0507	NaN	NaN	NaN	NaN	NaN	NaN	NaN	NaN	NaN	NaN
A0A6N4CPT7	Cell division protein	ASJ32_07710 GO994_20925	OTHER	CytoplasmicMembrane	D	cell division protein	Chromosome	NaN	NaN	NaN	NaN	NaN	NaN	NaN	NaN	NaN	21.5373	21.4889	21.361	NaN	NaN	21.8707	NaN	26.016	26.3823	25.8431	27.4724	25.7286	25.2652	25.6307	26.4154	26.0738	25.4945	26.5938	26.5956	25.5516	25.8152	26.7693	26.5194	NaN	NaN	NaN	NaN	16.601	NaN	NaN	NaN	NaN	NaN
A0A6N4CPT8	Deoxyribonuclease	ASJ32_08415 GO994_16840	SP(Sec/SPI)	Extracellular	L	Endonuclease I	Chromosome	24.7899	24.8779	25.1587	24.7631	24.3203	24.3124	24.6094	24.8993	24.7002	25.3727	24.7009	25.1412	24.5885	24.2667	24.4686	25.1874	21.2087	NaN	NaN	20.9502	20.5159	20.7035	21.7997	NaN	NaN	NaN	NaN	NaN	NaN	NaN	NaN	21.2407	NaN	NaN	NaN	NaN	NaN	NaN	NaN	NaN	NaN	NaN
A0A6N4CPU1	Cell division protein FtsA	ftsA ASJ32_15095 GO994_02385	OTHER	Cytoplasmic	D	Cell division protein that is involved in the assembly of the Z ring. May serve as a membrane anchor for the Z ring	Chromosome	23.7279	22.3591	22.5767	24.4904	24.2249	23.3048	23.3009	23.0566	22.6531	21.8271	23.0205	23.5462	23.7057	23.181	23.3381	23.7476	27.0656	27.3119	26.5258	27.3301	27.1937	27.1214	27.6557	27.1819	26.6716	27.1082	26.8342	27.33	26.9449	26.3409	27.4755	27.5504	16.7176	19.5791	19.7567	19.552	20.0089	18.8669	19.5857	19.9302	18.6564	20.0319
A0A6N4CPU2	ADP-ribose diphosphatase	ASJ32_05730	OTHER	Cytoplasmic	L	Hydrolase	Chromosome	22.9442	23.9944	23.1475	23.1374	24.9958	24.2964	25.2918	24.3125	22.0347	23.1012	21.8638	21.9608	23.0349	22.439	20.5954	22.3671	24.0304	NaN	23.8095	24.1998	25.0131	24.1502	24.473	24.9783	24.0228	23.6344	23.8149	23.489	23.4387	23.4654	21.0754	23.5478	NaN	19.1286	NaN	17.3732	NaN	NaN	NaN	NaN	NaN	18.7259
A0A6N4CPU8	Regulator of ribonuclease activity A	rraA ASJ32_07765 GO994_20870	OTHER	Cytoplasmic	H	Globally modulates RNA abundance by binding to RNase E (Rne) and regulating its endonucleolytic activity. Can modulate Rne action in a substrate-dependent manner by altering the composition of the degradosome. Modulates RNA-binding and helicase activities of the degradosome	Chromosome	25.6573	25.8699	26.7693	26.2825	25.7593	26.9835	26.5206	27.0271	25.8696	25.7688	26.2106	26.0765	25.6341	25.3691	26.068	26.2247	22.7596	23.4859	20.7459	23.5352	23.9698	24.1948	23.1885	23.4561	NaN	NaN	NaN	22.7311	22.295	NaN	21.452	NaN	NaN	NaN	NaN	NaN	NaN	NaN	NaN	NaN	NaN	NaN
A0A6N4CPV0	Glutamine synthetase	ASJ32_07850 GO994_20790	OTHER	Cytoplasmic	E	glutamine synthetase	Chromosome	21.4794	20.427	NaN	21.9109	22.2435	22.8704	22.4844	22.2055	NaN	NaN	NaN	20.8766	22.0165	NaN	21.4888	22.8227	22.6916	23.4209	22.6141	23.974	23.801	23.5972	24.06	24.2635	22.0147	23.632	21.9947	22.8687	23.0698	23.1439	23.8181	24.4274	NaN	NaN	NaN	NaN	NaN	NaN	NaN	NaN	NaN	NaN
A0A6N4CPV7	Galactose/methyl galactoside import ATP-binding protein MglA (EC 7.5.2.11)	ASJ32_07640	OTHER	CytoplasmicMembrane	G	Part of the ABC transporter complex MglABC involved in galactose methyl galactoside import. Responsible for energy coupling to the transport system	Chromosome	NaN	NaN	NaN	NaN	NaN	NaN	NaN	NaN	NaN	NaN	NaN	NaN	NaN	NaN	NaN	NaN	23.399	NaN	23.2261	23.6005	24.6966	23.0512	24.0908	NaN	23.4732	23.8143	23.8764	23.0747	23.4835	23.601	23.5831	24.5017	NaN	NaN	NaN	NaN	NaN	NaN	NaN	NaN	NaN	NaN
A0A6N4CPV8	N5-carboxyaminoimidazole ribonucleotide mutase (N5-CAIR mutase) (EC 5.4.99.18) (5-(carboxyamino)imidazole ribonucleotide mutase)	purE ASJ32_21630	OTHER	Unknown	F	Catalyzes the conversion of N5-carboxyaminoimidazole ribonucleotide (N5-CAIR) to 4-carboxy-5-aminoimidazole ribonucleotide (CAIR)	Chromosome	NaN	NaN	NaN	NaN	NaN	NaN	NaN	NaN	NaN	NaN	NaN	NaN	NaN	NaN	NaN	NaN	21.4187	NaN	20.2091	NaN	NaN	NaN	NaN	NaN	NaN	NaN	NaN	NaN	21.0177	21.054	21.0661	NaN	NaN	NaN	NaN	NaN	NaN	NaN	NaN	NaN	NaN	NaN
A0A6N4CPW1	Uncharacterized protein	ASJ32_22500	OTHER	Cytoplasmic	S	PFAM Relaxase mobilization nuclease family protein	Chromosome	23.2687	NaN	NaN	23.0165	NaN	NaN	NaN	NaN	NaN	NaN	23.4575	NaN	NaN	NaN	NaN	NaN	26.0236	26.0714	25.1934	27.3363	24.9432	23.7213	24.908	25.8166	24.3316	24.6625	24.4956	25.0916	24.022	24.1635	25.3618	25.5328	NaN	NaN	NaN	NaN	NaN	NaN	NaN	NaN	NaN	NaN
A0A6N4CPW2	Chaperone (Molecular chaperone)	yegD ASJ32_07875 GO994_20765	OTHER	Cytoplasmic	O	MreB/Mbl protein	Chromosome	22.6117	22.3181	21.9655	23.4247	19.5985	NaN	21.9558	21.9959	21.445	21.2919	21.2494	22.5848	23.2399	22.7005	21.7795	22.4387	26.6436	26.6206	26.0948	26.6686	26.0427	25.5568	26.1836	25.7592	26.1292	26.0295	25.8361	26.419	26.2967	26.1817	26.4015	26.5556	NaN	17.6852	18.0156	17.4331	NaN	NaN	NaN	NaN	NaN	17.4196
A0A6N4CPW5	Alanine--tRNA ligase (EC 6.1.1.7) (Alanyl-tRNA synthetase) (AlaRS)	alaS ASJ32_05840	OTHER	Cytoplasmic	J	Catalyzes the attachment of alanine to tRNA(Ala) in a two-step reaction alanine is first activated by ATP to form Ala- AMP and then transferred to the acceptor end of tRNA(Ala). Also edits incorrectly charged Ser-tRNA(Ala) and Gly-tRNA(Ala) via its editing domain	Chromosome	26.9779	26.8624	27.0573	26.7629	26.5441	26.6051	27.0442	26.8863	26.7653	26.3038	26.6384	26.6013	27.4649	27.5433	26.3327	26.9789	29.0105	27.4981	29.0591	28.41	29.0933	28.7606	28.3119	28.4263	29.1438	29.025	28.5196	28.8239	28.8125	28.8286	27.2797	27.6072	20.0632	20.4283	20.0863	20.3779	19.2045	18.4044	19.128	18.6356	18.9701	20.0014
A0A6N4CPX4	Citrate synthase	gltA ASJ32_06710	OTHER	Cytoplasmic	C	Belongs to the citrate synthase family	Chromosome	28.754	28.9796	29.0188	28.4087	28.1634	27.9578	27.7814	26.8569	28.693	28.4926	28.7584	27.7917	29.1961	29.3457	29.2276	27.6902	28.4333	27.6755	28.971	27.7671	28.1346	28.2617	27.335	28.1916	28.9551	27.9462	28.1254	27.6543	28.4531	28.6083	28.2673	28.2022	18.4385	19.2724	20.7702	20.5491	19.3868	18.9527	21.0201	19.5843	19.7253	NaN
A0A6N4CPX5	LPS export ABC transporter permease LptG	lptG ASJ32_05910 GO994_19905	OTHER	CytoplasmicMembrane	S	Permease	Chromosome	NaN	NaN	NaN	NaN	NaN	NaN	NaN	NaN	NaN	NaN	NaN	NaN	NaN	NaN	NaN	NaN	24.2488	NaN	23.9968	24.0677	24.8689	24.1744	23.2212	NaN	24.6804	24.1202	25.1765	24.6011	24.3966	24.6455	24.286	23.4991	NaN	NaN	NaN	NaN	NaN	NaN	NaN	NaN	NaN	NaN
A0A6N4CPY4	Phage tail protein	ASJ32_05975	OTHER	CytoplasmicMembrane	S	Phage-related minor tail protein	Chromosome	NaN	NaN	NaN	NaN	NaN	NaN	NaN	NaN	NaN	NaN	NaN	NaN	NaN	NaN	NaN	NaN	21.8468	NaN	NaN	22.3456	NaN	NaN	NaN	NaN	NaN	NaN	NaN	NaN	NaN	NaN	NaN	NaN	NaN	NaN	NaN	NaN	NaN	NaN	NaN	NaN	NaN	NaN
A0A6N4CPZ1	ATPase	ASJ32_08670	OTHER	Cytoplasmic	D	Domain of unknown function (DUF4041)	Chromosome	23.6777	22.7488	22.7003	26.0367	23.7661	NaN	NaN	22.826	22.9986	23.0548	25.2508	23.0562	23.6042	23.7392	24.7991	24.2598	26.4148	25.8207	25.8454	27.0669	26.2097	26.181	25.6501	26.3321	25.9812	26.0161	26.5517	26.4964	25.3648	25.8261	26.3609	26.2393	20.4559	19.9459	20.7613	20.2334	20.9901	20.2236	20.2823	20.5212	20.8111	21.186
A0A6N4CPZ2	Repressor	ASJ32_22285	OTHER	Unknown	-	-	Chromosome	NaN	NaN	NaN	22.5626	22.7254	22.2456	23.2058	NaN	22.8276	22.6773	22.6903	22.7752	NaN	NaN	NaN	22.634	NaN	NaN	NaN	NaN	NaN	NaN	NaN	NaN	NaN	NaN	NaN	NaN	NaN	NaN	NaN	NaN	NaN	NaN	NaN	NaN	NaN	NaN	NaN	NaN	NaN	NaN
A0A6N4CPZ3	D,D-heptose 1,7-bisphosphate phosphatase (EC 3.1.3.-)	ASJ32_22755	OTHER	Cytoplasmic	E	1,7-bisphosphate phosphatase	Chromosome	25.7478	25.2797	NaN	25.7127	25.2552	NaN	25.4976	24.5228	25.118	NaN	NaN	25.3317	25.6688	23.8079	22.8351	25.7244	24.7706	NaN	24.0117	25.6448	25.1005	24.4205	25.2421	26.4558	24.3052	25.9831	24.9582	25.8612	25.1462	23.276	25.0814	24.4321	NaN	NaN	NaN	NaN	NaN	NaN	NaN	NaN	NaN	NaN
A0A6N4CPZ4	Cytochrome B	ASJ32_19705 GO994_04045	OTHER	CytoplasmicMembrane	C	cytochrome	Chromosome	NaN	NaN	NaN	NaN	NaN	NaN	NaN	NaN	NaN	NaN	NaN	NaN	NaN	NaN	NaN	NaN	23.366	NaN	22.695	25.3254	NaN	NaN	NaN	NaN	NaN	NaN	NaN	NaN	23.8307	23.1195	24.8016	24.5467	NaN	NaN	NaN	NaN	NaN	NaN	NaN	NaN	NaN	NaN
A0A6N4CPZ5	Riboflavin synthase (Riboflavin synthase subunit alpha)	ASJ32_14655 GO994_12580	OTHER	Cytoplasmic	H	riboflavin synthase, alpha	Chromosome	22.3833	23.0644	22.2663	NaN	23.6886	23.962	23.5189	23.0416	22.0713	24.4842	NaN	23.6205	22.7022	22.567	23.0926	24.2397	NaN	NaN	NaN	NaN	NaN	NaN	NaN	NaN	NaN	NaN	NaN	NaN	NaN	NaN	NaN	NaN	NaN	NaN	NaN	NaN	NaN	NaN	NaN	NaN	NaN	NaN
A0A6N4CPZ7	Biopolymer transporter ExbD	ASJ32_21995 GO994_21985	OTHER	CytoplasmicMembrane	U	biopolymer transport protein	Chromosome	NaN	NaN	NaN	NaN	NaN	NaN	NaN	NaN	NaN	NaN	NaN	NaN	NaN	NaN	NaN	NaN	23.6548	24.3277	23.6093	24.7813	26.7871	27.3112	26.8526	26.393	NaN	22.3821	22.6903	22.0448	23.4464	24.6888	23.9194	23.9623	NaN	NaN	NaN	NaN	NaN	NaN	NaN	NaN	NaN	NaN
A0A6N4CQ00	DNA-directed RNA polymerase subunit beta' (RNAP subunit beta') (EC 2.7.7.6) (RNA polymerase subunit beta') (Transcriptase subunit beta')	rpoC ASJ32_07310 GO994_01685	OTHER	Cytoplasmic	K	DNA-dependent RNA polymerase catalyzes the transcription of DNA into RNA using the four ribonucleoside triphosphates as substrates	Chromosome	29.8273	30.1228	29.9051	30.1822	29.245	29.5352	29.516	29.3682	29.8619	29.6936	30.7002	29.9633	30.1854	29.2558	31.0812	29.8975	31.1778	30.9034	31.5741	30.9685	30.9461	30.9441	30.7994	31.0215	31.5423	31.246	31.3907	31.1296	31.4868	31.427	30.9043	30.4726	25.5461	25.6767	26.2698	26.2803	24.9465	24.7394	24.6882	25.6049	25.8886	25.9293
A0A6N4CQ01	Peptide chain release factor 1 (RF-1)	prfA ASJ32_21420 GO994_16985	OTHER	Cytoplasmic	J	Peptide chain release factor 1 directs the termination of translation in response to the peptide chain termination codons UAG and UAA	Chromosome	25.3702	25.2969	23.4416	25.0128	25.4409	25.2612	25.312	25.6067	25.426	26.0667	24.4389	26.2694	25.3034	24.7068	21.7589	25.4475	23.4452	24.9872	23.2197	23.1702	23.3391	23.5087	23.6905	24.3685	23.1033	24.9282	23.4269	24.0195	23.0068	23.0557	23.1789	22.795	NaN	NaN	NaN	NaN	NaN	NaN	NaN	NaN	NaN	17.6835
A0A6N4CQ07	Transcriptional regulator	ASJ32_22015	OTHER	Cytoplasmic	K	Autoinducer binding domain	Chromosome	NaN	NaN	NaN	NaN	NaN	NaN	NaN	NaN	NaN	NaN	NaN	NaN	NaN	NaN	NaN	NaN	22.1456	NaN	22.2708	NaN	22.1826	NaN	NaN	NaN	21.2636	NaN	21.7944	NaN	21.9243	22.0445	NaN	21.483	NaN	NaN	NaN	NaN	NaN	NaN	NaN	NaN	NaN	NaN
A0A6N4CQ09	Iron ABC transporter substrate-binding protein	ASJ32_14785	SP(Sec/SPI)	Unknown	P	Periplasmic binding protein	Chromosome	21.2432	22.4956	NaN	20.8667	26.3422	25.7909	25.9063	25.6711	19.4204	18.7296	19.7333	NaN	20.6822	19.3235	NaN	NaN	NaN	NaN	NaN	NaN	NaN	NaN	NaN	NaN	NaN	NaN	NaN	NaN	NaN	NaN	NaN	NaN	NaN	NaN	NaN	NaN	NaN	NaN	NaN	NaN	NaN	NaN
A0A6N4CQ10	Triosephosphate isomerase (TIM) (TPI) (EC 5.3.1.1) (Triose-phosphate isomerase)	tpiA ASJ32_21315 GO994_12310	OTHER	Cytoplasmic	G	Involved in the gluconeogenesis. Catalyzes stereospecifically the conversion of dihydroxyacetone phosphate (DHAP) to D-glyceraldehyde-3-phosphate (G3P)	Chromosome	28.4084	28.6963	28.552	27.3213	28.7579	28.3068	29.159	28.4558	28.3722	27.7773	27.3225	27.4474	28.1384	27.8131	27.3322	27.3839	28.0139	27.06	27.9481	28.073	27.8685	27.8235	27.9326	27.5337	28.17	27.9138	29.1379	27.8362	27.817	27.2905	28.4345	28.2723	NaN	NaN	NaN	NaN	NaN	NaN	NaN	NaN	NaN	20.3417
A0A6N4CQ12	Bifunctional ligase/repressor BirA (Biotin operon repressor) (Biotin--[acetyl-CoA-carboxylase] ligase) (EC 6.3.4.15) (Biotin--protein ligase) (Biotin-[acetyl-CoA carboxylase] synthetase)	birA ASJ32_07375 GO994_01620	OTHER	Cytoplasmic	HK	Acts both as a biotin-- acetyl-CoA-carboxylase ligase and a biotin-operon repressor. In the presence of ATP, BirA activates biotin to form the BirA-biotinyl-5'-adenylate (BirA-bio- 5'-AMP or holoBirA) complex. HoloBirA can either transfer the biotinyl moiety to the biotin carboxyl carrier protein (BCCP) subunit of acetyl-CoA carboxylase, or bind to the biotin operator site and inhibit transcripti…	Chromosome	21.9297	21.3903	21.2129	22.0885	23.3099	NaN	22.2707	NaN	21.3627	NaN	21.2988	NaN	21.9003	NaN	NaN	22.6016	23.451	23.4952	23.2932	NaN	22.2754	23.8562	23.8286	23.8615	22.4203	23.8268	22.8761	23.3408	23.6015	22.604	22.7223	23.993	NaN	NaN	NaN	NaN	NaN	NaN	NaN	NaN	NaN	NaN
A0A6N4CQ16	60 kDa chaperonin (GroEL protein) (Protein Cpn60)	groEL groL ASJ32_19820 GO994_04165	OTHER	Cytoplasmic	O	Prevents misfolding and promotes the refolding and proper assembly of unfolded polypeptides generated under stress conditions	Chromosome	30.4658	30.7413	30.1964	30.7994	30.3201	31.1794	30.5831	30.9413	30.5514	30.5951	31.0826	30.5647	30.7026	30.6463	31.7123	31.0204	28.3514	29.0505	28.7701	28.2047	29.0125	30.1459	28.9682	29.9516	28.4844	28.4346	28.8454	28.1076	28.9711	29.0386	28.8509	28.5264	21.6546	20.282	20.6995	17.1971	21.7248	20.5971	21.858	21.0701	19.9095	18.174
A0A6N4CQ22	Conjugal transfer protein TraI (Fragment)	ASJ32_21195	OTHER	CytoplasmicMembrane	L	TrwC relaxase	Chromosome	21.1557	21.2881	22.4934	23.0173	22.7253	21.2407	22.372	23.1108	21.0548	NaN	22.0445	21.6793	21.9135	22.971	21.9088	22.4421	22.752	23.7473	22.2806	23.0468	23.1579	23.9323	24.0552	24.3542	22.1483	22.6484	22.199	23.0159	23.4018	23.3253	24.0148	23.9123	NaN	NaN	NaN	NaN	NaN	NaN	NaN	NaN	NaN	NaN
A0A6N4CQ25	Formyltetrahydrofolate deformylase (EC 3.5.1.10) (Formyl-FH(4) hydrolase)	purU ASJ32_07960	OTHER	Cytoplasmic	F	Catalyzes the hydrolysis of 10-formyltetrahydrofolate (formyl-FH4) to formate and tetrahydrofolate (FH4)	Chromosome	25.67	25.9714	26.2862	25.503	26.1622	26.6377	25.9656	26.3202	25.597	24.9163	25.1531	25.2084	25.5102	25.9725	25.752	24.8764	25.0186	22.5752	24.8132	24.1628	24.2478	24.2251	21.7841	24.0304	26.1445	23.9562	24.8907	23.4121	24.574	24.6043	23.7517	22.8844	NaN	NaN	NaN	NaN	NaN	NaN	NaN	NaN	NaN	NaN
A0A6N4CQ26	Carbamoyl-phosphate synthase large chain (EC 6.3.5.5) (Carbamoyl-phosphate synthetase ammonia chain)	carB ASJ32_19535	LIPO(Sec/SPII)	Unknown	F	Carbamoyl-phosphate synthetase ammonia chain	Chromosome	28.2838	28.0686	28.8319	28.7315	27.4865	27.3911	27.8622	27.4784	27.3571	28.0227	27.879	28.2851	28.4041	28.1216	28.1436	28.452	29.7065	29.4261	29.7235	29.8723	29.2427	28.855	28.9976	29.0452	29.6362	29.3209	29.0695	29.3783	29.7698	29.6312	29.3554	29.8323	23.5047	23.5784	23.6804	23.9046	22.9333	22.1377	21.4917	22.9638	22.8927	23.3758
A0A6N4CQ28	DNA topoisomerase 4 subunit B (EC 5.6.2.2) (Topoisomerase IV subunit B)	parE ASJ32_21895 GO994_19510	OTHER	Cytoplasmic	L	Topoisomerase IV is essential for chromosome segregation. It relaxes supercoiled DNA. Performs the decatenation events required during the replication of a circular DNA molecule	Chromosome	22.7181	20.9173	21.8602	23.8117	23.7942	21.8793	22.1508	21.5701	20.8623	22.5124	22.2634	21.0629	22.0196	21.9454	22.0266	22.6643	25.0486	25.1783	24.9982	25.3003	24.8596	24.839	25.1047	25.0175	25.271	25.0359	24.8858	25.2181	25.0309	25.1069	25.3434	25.4083	NaN	NaN	17.6408	17.4533	NaN	NaN	NaN	NaN	NaN	18.1612
A0A6N4CQ36	Gfo/Idh/MocA family oxidoreductase (Oxidoreductase)	ASJ32_08010 GO994_16000	OTHER	Unknown	S	Oxidoreductase	Chromosome	22.3984	23.2145	24.1094	23.0871	22.9932	22.3885	22.8545	23.8152	23.0504	23.1683	22.4138	22.6907	23.285	22.2802	22.1818	22.0902	22.4498	21.6546	22.866	NaN	23.0568	23.9848	22.4548	NaN	21.8953	NaN	20.7906	NaN	21.4075	22.7578	NaN	NaN	NaN	NaN	NaN	NaN	NaN	NaN	NaN	NaN	NaN	NaN
A0A6N4CQ38	Transcriptional regulator	ASJ32_14130	OTHER	Cytoplasmic	K	transcriptional	Chromosome	24.4634	23.9152	23.9646	25.051	23.1561	19.8951	21.1698	22.9623	22.7446	21.2664	22.2636	23.5838	24.8442	23.9481	24.0029	24.7346	27.5266	27.2705	27.0293	27.3597	26.5536	26.2103	26.7958	25.8048	26.1171	26.5518	26.0964	26.4971	26.9535	26.4647	27.3432	27.3644	NaN	16.5414	17.1485	17.2706	16.5511	NaN	17.0995	NaN	NaN	17.2121
A0A6N4CQ39	Alpha-1,4 glucan phosphorylase (EC 2.4.1.1)	ASJ32_07080	OTHER	Cytoplasmic	G	Phosphorylase is an important allosteric enzyme in carbohydrate metabolism. Enzymes from different sources differ in their regulatory mechanisms and in their natural substrates. However, all known phosphorylases share catalytic and structural properties	Chromosome	26.227	26.4265	26.9651	26.1074	26.9075	26.7482	26.8077	26.8774	26.1785	25.3598	26.0995	25.385	26.3038	26.7722	26.6295	25.3963	25.0306	23.3711	25.2895	24.2566	26.0543	26.252	26.0688	26.1646	25.1349	23.7107	24.1355	23.988	24.7999	25.2256	24.3125	24.6123	NaN	NaN	NaN	NaN	NaN	NaN	NaN	NaN	NaN	NaN
A0A6N4CQ44	Terminase	ASJ32_21855	OTHER	Cytoplasmic	S	Terminase RNaseH-like domain	Chromosome	NaN	NaN	NaN	NaN	NaN	NaN	NaN	NaN	NaN	NaN	NaN	NaN	NaN	NaN	NaN	NaN	NaN	NaN	23.918	24.5054	NaN	24.6374	NaN	24.0258	NaN	NaN	NaN	NaN	23.5179	NaN	NaN	23.5375	NaN	NaN	NaN	NaN	NaN	NaN	NaN	NaN	NaN	NaN
A0A6N4CQ45	Aspartate carbamoyltransferase (EC 2.1.3.2) (Aspartate transcarbamylase) (ATCase)	pyrB ASJ32_07585	OTHER	Cytoplasmic	F	Belongs to the ATCase OTCase family	Chromosome	26.6473	26.7288	26.9518	26.4188	26.0457	26.1591	25.7409	26.4927	26.8777	26.5662	27.2609	26.2301	26.7954	26.6087	27.3188	26.1381	28.0415	27.386	27.6722	26.5533	27.2135	27.0829	27.0163	26.6885	27.8912	27.7388	27.5649	27.1384	27.5621	27.4073	27.1899	26.8917	NaN	20.5926	18.6869	18.7716	18.8712	NaN	NaN	NaN	NaN	19.8552
A0A6N4CQ48	2-keto-4-pentenoate hydratase	ASJ32_19360	OTHER	Unknown	Q	Fumarylacetoacetate (FAA) hydrolase family	Chromosome	21.0784	21.6988	20.888	20.9486	22.6544	23.0653	23.6749	23.0781	22.1978	21.8411	23.7535	NaN	NaN	NaN	NaN	NaN	NaN	NaN	NaN	NaN	NaN	NaN	NaN	NaN	NaN	NaN	NaN	NaN	NaN	NaN	NaN	NaN	NaN	NaN	NaN	NaN	NaN	NaN	NaN	NaN	NaN	NaN
A0A6N4CQ53	D-galactose-binding periplasmic protein (D-galactose/ D-glucose-binding protein)	mglB ASJ32_07645 GO994_20990	SP(Sec/SPI)	Periplasmic	G	Periplasmic binding protein domain	Chromosome	24.6242	24.4243	25.2095	24.4093	25.8223	25.4223	25.6777	25.641	23.8528	24.5072	23.3761	24.6658	23.0771	23.599	22.6746	24.8811	23.4514	NaN	NaN	NaN	23.2736	23.2893	NaN	NaN	NaN	NaN	NaN	NaN	NaN	NaN	NaN	NaN	NaN	NaN	NaN	NaN	NaN	NaN	NaN	NaN	NaN	NaN
A0A6N4CQ56	tRNA pseudouridine synthase A (EC 5.4.99.12) (tRNA pseudouridine(38-40) synthase) (tRNA pseudouridylate synthase I) (tRNA-uridine isomerase I)	truA hisT ASJ32_19430	OTHER	Unknown	J	Formation of pseudouridine at positions 38, 39 and 40 in the anticodon stem and loop of transfer RNAs	Chromosome	24.453	24.7451	25.4742	22.9264	23.0966	23.7716	24.1793	24.2291	23.9586	24.0914	24.5878	24.2819	23.9655	24.2275	24.1253	NaN	24.2611	NaN	25.9307	25.4691	25.0618	24.0838	21.892	24.6614	25.6282	24.669	24.2874	25.2461	25.6533	24.8016	24.1067	22.9391	NaN	NaN	NaN	NaN	NaN	NaN	NaN	NaN	NaN	NaN
A0A6N4CQ58	Major outer membrane lipoprotein Lpp	lpp ASJ32_07950 GO994_15940	LIPO(Sec/SPII)	OuterMembrane	M	Lipoprotein leucine-zipper	Chromosome	25.4513	24.6089	25.8476	26.0539	24.1331	23.2721	23.8396	24.6182	24.6458	24.8142	26.3556	25.8238	25.0577	26.275	25.8551	26.012	28.6378	29.2606	29.9921	30.4194	28.7798	27.7532	28.5949	29.5552	29.8436	28.5894	29.3843	29.2882	28.3885	28.348	28.3852	29.1504	27.519	26.8797	27.0869	26.658	26.8701	27.1236	27.0892	26.9909	27.7781	26.9717
A0A6N4CQ60	30S ribosomal protein S1	rpsA ASJ32_21140	OTHER	Cytoplasmic	J	thus facilitating recognition of the initiation point. It is needed to translate mRNA with a short Shine-Dalgarno (SD) purine-rich sequence	Chromosome	31.6816	32.0034	31.2034	31.9335	31.246	31.4241	31.1514	31.7819	32.2101	31.7789	31.7815	32.2152	31.9195	32.0342	32.546	32.0675	29.1617	29.8599	30.0845	28.6146	28.3041	29.4333	29.4215	29.863	30.0532	30.2297	29.9525	29.8298	29.9208	29.8206	30.102	29.3108	21.6221	21.7299	21.4262	21.3913	18.9593	18.2514	22.9009	19.2222	21.948	21.4446
A0A6N4CQ61	Diguanylate cyclase	ASJ32_08115	OTHER	CytoplasmicMembrane	T	Response regulator PleD (Stalked cell differentiation-controllingprotein)	Chromosome	NaN	NaN	NaN	NaN	NaN	NaN	NaN	NaN	NaN	NaN	NaN	NaN	NaN	NaN	NaN	NaN	23.542	22.4199	22.4498	24.7646	23.4028	23.0491	23.6676	23.5601	22.4572	22.5536	23.3059	24.177	22.9668	23.0316	25.0839	24.1483	NaN	NaN	NaN	NaN	NaN	NaN	NaN	NaN	NaN	NaN
A0A6N4CQ63	Arginine--tRNA ligase (EC 6.1.1.19) (Arginyl-tRNA synthetase) (ArgRS)	argS ASJ32_07705	OTHER	Cytoplasmic	J	Arginyl-tRNA synthetase	Chromosome	27.1483	27.4763	27.0293	26.497	26.547	26.9331	27.3328	27.0195	26.5975	27.1851	26.3477	26.5115	27.2419	27.3659	25.3509	27.0677	28.4974	28.0023	28.0035	27.3498	28.629	27.8986	27.9848	27.6458	28.1294	28.5973	27.2718	27.5438	28.3114	27.9469	26.7131	27.1187	18.3011	18.714	18.8022	17.9759	19.0141	16.4203	17.4063	NaN	16.6619	19.4911
A0A6N4CQ64	Oxoglutarate dehydrogenase (succinyl-transferring) (EC 1.2.4.2)	ASJ32_06735	OTHER	Cytoplasmic	C	dehydrogenase, E1 component	Chromosome	26.5402	26.7274	27.2739	26.8387	25.6555	25.923	25.9324	26.1896	26.7068	26.1205	27.3844	26.5839	27.7066	27.1067	28.1208	26.8259	28.0778	27.1892	28.2363	27.5104	27.7371	27.4507	26.8362	27.3705	28.2235	28.0164	28.3627	27.2309	28.7145	28.6384	28.2927	26.9935	20.9062	19.4634	19.0365	20.7216	17.1073	18.7898	18.3781	19.2289	19.8261	19.5418
A0A6N4CQ66	Cobyrinic acid a,c-diamide synthase	ASJ32_14285	OTHER	CytoplasmicMembrane	D	Belongs to the ParA family	Chromosome	NaN	NaN	NaN	NaN	NaN	NaN	NaN	NaN	NaN	NaN	NaN	NaN	NaN	NaN	NaN	NaN	23.3393	22.9855	23.3248	23.7481	23.8047	23.1519	24.2985	23.25	23.0394	23.8175	22.623	22.4001	22.9499	22.5819	22.4339	23.9044	NaN	NaN	NaN	NaN	NaN	NaN	NaN	NaN	NaN	NaN
A0A6N4CQ69	Uncharacterized protein	ASJ32_19480 GO994_13555	SP(Sec/SPI)	Unknown	-	-	Chromosome	21.9878	NaN	21.9461	22.4651	23.7619	25.5236	25.8605	25.2528	NaN	22.2708	NaN	22.6035	NaN	NaN	NaN	NaN	NaN	NaN	NaN	NaN	NaN	NaN	NaN	NaN	NaN	NaN	NaN	NaN	NaN	NaN	NaN	NaN	NaN	NaN	NaN	NaN	NaN	NaN	NaN	NaN	NaN	NaN
A0A6N4CQ71	Ribosomal protein S12 methylthiotransferase accessory factor YcaO	ASJ32_06770	OTHER	Cytoplasmic	S	YcaO cyclodehydratase, ATP-ad Mg2+-binding	Chromosome	26.3308	26.1916	25.765	25.3647	25.8999	25.8663	26.2891	26.1055	25.6684	25.4467	24.7595	24.9339	26.1636	26.2505	24.8499	25.6439	27.4907	27.0271	27.1574	26.874	27.9975	27.6669	27.2502	26.7484	27.2045	27.673	26.3064	27.0258	27.0834	26.9267	25.5481	25.8353	20.7301	19.1224	19.8116	20.0293	19.3555	17.3039	NaN	NaN	20.6096	19.0102
A0A6N4CQ74	2-oxobutyrate oxidase (Isopenicillin N synthase family oxygenase)	ASJ32_06790 GO994_12235	OTHER	Cytoplasmic	C	Belongs to the iron ascorbate-dependent oxidoreductase family	Chromosome	NaN	19.911	22.3064	NaN	21.265	20.3468	21.3412	21.3924	20.6654	21.0843	NaN	NaN	20.7243	NaN	NaN	20.5974	NaN	NaN	NaN	NaN	NaN	NaN	NaN	NaN	NaN	NaN	NaN	NaN	NaN	NaN	NaN	NaN	NaN	NaN	NaN	NaN	NaN	NaN	NaN	NaN	NaN	NaN
A0A6N4CQ75	Chemotaxis protein CheW	ASJ32_14335	OTHER	Cytoplasmic	NT	CheW-like domain	Chromosome	24.4031	24.4295	24.2762	23.0672	24.7425	23.5271	25.0152	23.6992	24.5497	25.1739	23.2513	23.2299	23.3992	24.6845	22.3568	22.9065	24.6343	NaN	24.8806	22.1764	23.7628	24.2236	24.3956	23.8375	24.9052	24.3531	25.4813	23.5961	25.4316	24.583	25.5175	24.666	NaN	NaN	NaN	NaN	NaN	NaN	NaN	NaN	NaN	NaN
A0A6N4CQ76	Adenylate cyclase (EC 4.6.1.1)	cyaA ASJ32_05985	OTHER	Cytoplasmic	F	Belongs to the adenylyl cyclase class-1 family	Chromosome	24.8928	26.2449	28.6753	26.4168	25.4476	25.7881	NaN	25.4478	27.067	24.8613	26.4226	23.0004	23.3222	25.4569	27.6604	22.8227	23.8291	22.1869	22.9573	23.4634	23.67	22.7051	22.9317	22.4601	23.385	22.688	22.9305	23.6254	23.7024	23.2575	23.4135	24.0462	17.2672	NaN	NaN	NaN	NaN	NaN	NaN	NaN	NaN	NaN
A0A6N4CQ77	Hemolysin D	ASJ32_08050	OTHER	CytoplasmicMembrane	M	Belongs to the membrane fusion protein (MFP) (TC 8.A.1) family	Chromosome	NaN	NaN	NaN	NaN	NaN	NaN	NaN	NaN	NaN	NaN	NaN	NaN	NaN	NaN	NaN	NaN	25.9942	25.1666	25.5012	26.7779	25.8931	25.3927	25.4188	25.814	25.5859	25.4919	25.8877	26.0772	26.0625	25.8955	25.6564	26.568	NaN	NaN	NaN	NaN	NaN	NaN	NaN	NaN	NaN	NaN
A0A6N4CQ80	MOSC domain-containing protein (Molybdenum cofactor sulfurase)	ASJ32_07815 GO994_20825	OTHER	Unknown	S	3-alpha domain	Chromosome	22.9929	23.2908	22.3206	21.1359	23.6361	24.1231	23.6608	23.1172	21.8452	23.0404	20.3443	22.25	23.3877	22.9982	21.1111	21.4519	NaN	NaN	NaN	NaN	NaN	NaN	NaN	NaN	NaN	NaN	NaN	NaN	NaN	NaN	NaN	NaN	NaN	NaN	NaN	NaN	NaN	NaN	NaN	NaN	NaN	NaN
A0A6N4CQ81	Glyoxalase	ASJ32_08220	OTHER	Unknown	E	glyoxalase bleomycin resistance protein dioxygenase	Chromosome	21.6415	21.8012	22.6636	21.6826	21.5659	22.4955	22.3102	21.6015	22.1916	22.7517	22.3606	23.0753	21.8156	20.7292	20.6144	22.0408	NaN	NaN	NaN	NaN	NaN	NaN	NaN	NaN	NaN	NaN	NaN	NaN	NaN	NaN	NaN	NaN	NaN	NaN	NaN	NaN	NaN	NaN	NaN	NaN	NaN	NaN
A0A6N4CQ84	HTH-type transcriptional regulator MetR	ASJ32_06825	OTHER	Cytoplasmic	K	Transcriptional regulator	Chromosome	21.1496	20.3962	NaN	21.0999	21.7081	22.6798	22.1266	21.6456	NaN	NaN	NaN	NaN	22.1939	NaN	NaN	21.5966	21.4377	23.9341	22.1103	22.0787	21.7355	23.4471	23.9023	24.1092	NaN	22.1532	NaN	22.1618	22.9615	22.1803	NaN	24.1984	NaN	NaN	NaN	NaN	NaN	NaN	NaN	NaN	NaN	NaN
A0A6N4CQ85	Cytochrome C biogenesis protein CcmH	ASJ32_14385	OTHER	CytoplasmicMembrane	O	Cytochrome c-type biogenesis protein	Chromosome	NaN	NaN	NaN	NaN	NaN	NaN	NaN	NaN	NaN	NaN	NaN	NaN	NaN	NaN	NaN	NaN	26.3939	26.0859	26.3297	27.0989	25.4569	25.1463	25.3602	25.3594	26.544	26.6903	27.2269	27.0595	26.4671	26.6529	27.4554	26.894	NaN	NaN	NaN	NaN	NaN	NaN	NaN	NaN	NaN	NaN
A0A6N4CQ89	Lactate dehydrogenase (EC 1.1.1.28)	ASJ32_07870	OTHER	Cytoplasmic	C	Belongs to the D-isomer specific 2-hydroxyacid dehydrogenase family	Chromosome	25.9902	26.2855	25.516	24.7632	26.678	26.611	26.2384	26.0424	25.2016	24.9643	24.1843	24.6214	25.848	25.7225	24.4674	25.0777	24.4464	25.0756	24.6389	23.744	25.3789	25.2066	25.1149	25.2886	24.4669	24.4842	23.7021	23.7318	24.5677	23.6346	23.5845	24.5781	NaN	NaN	NaN	NaN	NaN	NaN	NaN	NaN	NaN	NaN
A0A6N4CQ91	Transporter	ASJ32_21700	LIPO(Sec/SPII)	Periplasmic	S	BON domain	Chromosome	NaN	NaN	NaN	NaN	NaN	NaN	NaN	NaN	NaN	NaN	NaN	NaN	NaN	NaN	NaN	NaN	NaN	NaN	NaN	NaN	NaN	NaN	NaN	NaN	NaN	NaN	NaN	NaN	NaN	NaN	NaN	NaN	NaN	NaN	NaN	NaN	NaN	NaN	NaN	NaN	NaN	NaN
A0A6N4CQ98	Chloramphenicol acetyltransferase	ASJ32_06090	OTHER	Cytoplasmic	S	Bacterial transferase hexapeptide (six repeats)	Chromosome	NaN	22.1374	22.9093	NaN	23.5853	23.2135	23.4891	23.6839	NaN	NaN	NaN	NaN	22.4128	21.5752	23.6596	NaN	NaN	NaN	NaN	NaN	23.1204	22.9004	22.2626	NaN	NaN	21.863	NaN	NaN	NaN	NaN	NaN	NaN	NaN	NaN	NaN	NaN	NaN	NaN	NaN	NaN	NaN	NaN
A0A6N4CQ99	Uncharacterized protein	ASJ32_07865	SP(Sec/SPI)	Unknown	S	CreA protein	Chromosome	21.5593	NaN	NaN	NaN	22.4276	NaN	21.4835	21.7958	NaN	NaN	NaN	NaN	21.5505	NaN	NaN	NaN	NaN	NaN	NaN	21.1829	20.8237	NaN	NaN	NaN	NaN	NaN	NaN	NaN	NaN	NaN	NaN	21.5781	NaN	NaN	NaN	NaN	NaN	NaN	NaN	NaN	NaN	NaN
A0A6N4CQA2	Bifunctional aspartokinase/homoserine dehydrogenase [Includes: Aspartokinase (EC 2.7.2.4); Homoserine dehydrogenase (EC 1.1.1.3)]	thrA ASJ32_19320	OTHER	Cytoplasmic	E	homoserine dehydrogenase	Chromosome	27.0352	26.0855	26.5686	26.9612	27.2894	27.0849	27.765	26.7231	24.216	24.9412	25.2297	25.0497	26.9259	26.1808	26.1418	26.5564	28.4606	27.9046	28.6588	27.9346	28.462	28.8382	27.9249	28.5544	27.4795	27.7172	27.3938	27.8162	28.677	28.5907	28.1674	28.3693	19.2359	20.752	20.6648	20.8731	21.3373	20.4653	19.0544	21.0381	18.3367	19.9163
A0A6N4CQA4	Protein-disulfide reductase	ASJ32_03140	SP(Sec/SPI)	CytoplasmicMembrane	CO	suppressor for copper-sensitivity B	Chromosome	NaN	NaN	NaN	NaN	NaN	NaN	NaN	NaN	NaN	NaN	NaN	NaN	NaN	NaN	NaN	NaN	22.18	22.6451	22.1191	23.5935	23.1314	21.103	21.6718	NaN	23.2736	22.5632	23.8217	22.8279	22.391	22.3733	22.4502	22.4193	NaN	NaN	NaN	NaN	NaN	NaN	NaN	NaN	NaN	NaN
A0A6N4CQA6	Histidine kinase (EC 2.7.13.3)	ASJ32_06945	OTHER	CytoplasmicMembrane	T	Double sensory domain of two-component sensor kinase	Chromosome	NaN	NaN	NaN	NaN	NaN	NaN	NaN	NaN	NaN	NaN	NaN	NaN	NaN	NaN	NaN	NaN	21.1153	23.0801	NaN	22.5734	21.2664	NaN	NaN	21.4962	21.9127	NaN	22.252	22.3526	NaN	NaN	NaN	21.9601	NaN	NaN	NaN	NaN	NaN	NaN	NaN	NaN	NaN	NaN
A0A6N4CQA7	Phosphate regulon sensor protein PhoR (EC 2.7.13.3)	phoR ASJ32_08210	OTHER	CytoplasmicMembrane	T	Domain of unknown function (DUF3329)	Chromosome	NaN	NaN	NaN	NaN	NaN	NaN	NaN	NaN	NaN	NaN	NaN	NaN	NaN	NaN	NaN	NaN	24.7573	NaN	24.2305	23.0959	24.4552	23.0383	23.1384	23.4704	24.5963	23.8576	24.4778	24.0542	23.244	23.4826	22.2961	24.0017	NaN	NaN	NaN	NaN	NaN	NaN	NaN	NaN	NaN	NaN
A0A6N4CQA9	Phosphomethylpyrimidine synthase (EC 4.1.99.17) (Hydroxymethylpyrimidine phosphate synthase) (HMP-P synthase) (HMP-phosphate synthase) (HMPP synthase) (Thiamine biosynthesis protein ThiC)	thiC ASJ32_06140	OTHER	Cytoplasmic	H	Catalyzes the synthesis of the hydroxymethylpyrimidine phosphate (HMP-P) moiety of thiamine from aminoimidazole ribotide (AIR) in a radical S-adenosyl-L-methionine (SAM)-dependent reaction	Chromosome	27.0289	27.1859	26.8572	26.7867	26.718	26.5753	26.6269	26.8638	26.1203	25.5409	25.1462	25.9145	26.7988	27.0804	26.163	26.7428	25.3766	25.3442	25.7216	25.5532	25.1564	25.4124	24.4841	25.4927	25.5349	24.3247	24.2343	24.8027	25.298	25.738	25.2664	24.9949	NaN	NaN	18.3768	19.2442	19.4243	NaN	NaN	NaN	NaN	NaN
A0A6N4CQB6	Na(+)/H(+) antiporter NhaB (Sodium/proton antiporter NhaB)	nhaB ASJ32_07005 GO994_12005	OTHER	CytoplasmicMembrane	P	) H( ) antiporter that extrudes sodium in exchange for external protons	Chromosome	NaN	NaN	NaN	NaN	NaN	NaN	NaN	NaN	NaN	NaN	NaN	NaN	NaN	NaN	NaN	NaN	22.9021	21.577	23.1595	23.2855	22.9214	22.6942	22.5361	NaN	22.0699	NaN	22.7933	22.6425	21.8372	22.435	NaN	23.5163	NaN	NaN	NaN	NaN	NaN	NaN	NaN	NaN	NaN	NaN
A0A6N4CQB7	UvrABC system protein B (Protein UvrB) (Excinuclease ABC subunit B)	uvrB ASJ32_06985 GO994_12025	OTHER	Cytoplasmic	L	damaged site, the DNA wraps around one UvrB monomer. DNA wrap is dependent on ATP binding by UvrB and probably causes local melting of the DNA helix, facilitating insertion of UvrB beta-hairpin between the DNA strands. Then UvrB probes one DNA strand for the presence of a lesion. If a lesion is found the UvrA subunits dissociate and the UvrB-DNA preincision complex is formed. This complex is subs…	Chromosome	22.373	22.2204	NaN	NaN	23.2117	NaN	22.3868	22.1079	NaN	NaN	NaN	NaN	22.0739	22.4393	NaN	23.0421	24.8787	25.403	24.6456	23.8832	25.3537	25.1296	25.6141	25.608	24.4457	24.7102	23.825	23.5717	24.9221	24.903	25.502	25.3474	NaN	NaN	NaN	NaN	NaN	NaN	NaN	NaN	NaN	NaN
A0A6N4CQC2	Uncharacterized protein	ASJ32_22080	SP(Sec/SPI)	CytoplasmicMembrane	DM	mechanosensitive ion channel	Chromosome	NaN	NaN	NaN	NaN	NaN	NaN	NaN	NaN	NaN	NaN	NaN	NaN	NaN	NaN	NaN	NaN	25.7553	24.8551	26.0882	26.3189	25.8756	24.807	24.6886	25.3643	26.1897	25.5564	26.8861	26.1311	25.8775	26.1495	26.3026	25.995	NaN	NaN	NaN	NaN	17.0959	NaN	NaN	NaN	NaN	NaN
A0A6N4CQC3	DUF416 family protein	ASJ32_03240 GO994_20635	OTHER	Cytoplasmic	S	Protein of unknown function (DUF416)	Chromosome	26.3157	26.0177	25.1193	24.3857	26.0044	23.6261	24.601	24.0198	26.4195	22.8993	25.3693	25.3769	26.3833	26.2575	24.751	23.2373	21.3936	NaN	23.918	NaN	21.1466	NaN	22.0633	20.9938	21.5637	NaN	NaN	NaN	21.9743	NaN	NaN	NaN	NaN	NaN	NaN	NaN	NaN	NaN	NaN	NaN	NaN	NaN
A0A6N4CQC5	Protease TldD	tldD ASJ32_06250	OTHER	Cytoplasmic	S	Putative modulator of DNA gyrase	Chromosome	24.7569	24.9524	25.3175	24.9633	24.9791	25.5027	25.5608	25.1031	24.9448	25.4375	24.2952	25.0745	24.9408	24.4177	21.9667	24.8541	25.2208	25.4761	24.951	25.2055	25.6823	25.3509	25.3394	25.4168	24.9351	25.4398	24.4182	24.9797	24.7222	24.8894	24.1738	25.0236	NaN	17.9638	NaN	NaN	16.5817	NaN	NaN	NaN	NaN	18.5404
A0A6N4CQC6	Adenylosuccinate lyase (ASL) (EC 4.3.2.2) (Adenylosuccinase)	ASJ32_21510	OTHER	Cytoplasmic	F	Belongs to the lyase 1 family. Adenylosuccinate lyase subfamily	Chromosome	28.777	28.6598	28.3762	28.1683	28.8104	28.6143	27.8773	28.2385	28.3964	27.6369	27.4318	27.3326	28.727	29.2831	27.9712	27.732	26.9641	26.8641	27.7414	25.5226	25.2766	27.4519	27.1229	27.4584	26.6596	27.2864	26.1392	26.3732	27.2435	26.8873	26.5965	27.1404	NaN	19.0116	15.8438	16.663	NaN	NaN	NaN	NaN	NaN	NaN
A0A6N4CQC7	Serine/threonine transporter SstT (Na(+)/serine-threonine symporter)	sstT ASJ32_07035	OTHER	CytoplasmicMembrane	E	Involved in the import of serine and threonine into the cell, with the concomitant import of sodium (symport system)	Chromosome	NaN	NaN	NaN	NaN	NaN	NaN	NaN	NaN	NaN	NaN	NaN	NaN	NaN	NaN	NaN	NaN	26.4432	27.3552	27.5969	28.0148	26.8146	26.612	26.1059	27.3177	26.5094	25.2581	26.995	25.8652	27.0777	27.5916	27.4908	26.6676	17.5351	19.0961	18.1783	18.1407	20.2909	16.8699	19.0759	NaN	NaN	16.7373
A0A6N4CQC8	Putative pre-16S rRNA nuclease (EC 3.1.-.-)	ruvX ASJ32_08440 GO994_16870	OTHER	Cytoplasmic	J	Could be a nuclease involved in processing of the 5'-end of pre-16S rRNA	Chromosome	23.5303	23.5526	23.9051	23.0626	24.1341	23.2269	24.1512	23.9485	23.0611	25.0193	23.0207	NaN	22.8776	22.6789	NaN	23.4975	NaN	NaN	NaN	NaN	NaN	NaN	NaN	NaN	NaN	NaN	NaN	NaN	NaN	NaN	NaN	NaN	NaN	NaN	NaN	NaN	NaN	NaN	NaN	NaN	NaN	NaN
A0A6N4CQC9	Fumarate hydratase class I (EC 4.2.1.2)	ASJ32_07055	OTHER	Cytoplasmic	C	Catalyzes the reversible hydration of fumarate to (S)- malate	Chromosome	25.6689	25.1384	24.8093	25.2896	24.5407	23.106	23.2125	22.6655	24.5063	25.4997	24.3386	24.891	25.8422	24.7109	23.5077	25.3007	25.6625	26.1957	25.3585	24.9005	24.1962	24.6873	25.5851	25.3408	24.9842	26.2504	24.7223	25.5867	25.7998	25.6529	25.6661	26.3274	NaN	18.2235	17.5143	17.024	NaN	NaN	NaN	NaN	NaN	18.9276
A0A6N4CQD0	Chromosome partition protein Smc	smc ASJ32_08320	OTHER	Cytoplasmic	D	Required for chromosome condensation and partitioning	Chromosome	22.1695	21.5662	22.8654	23.5094	23.6697	21.9078	22.5939	22.3379	22.3282	NaN	21.8297	22.8889	23.5246	22.221	22.1708	22.8827	24.2781	24.3186	23.7035	24.2878	24.865	24.8649	25.3122	24.7342	23.7766	24.3218	23.6302	24.591	24.0155	24.1382	24.2348	24.6282	NaN	NaN	NaN	NaN	NaN	NaN	NaN	NaN	NaN	NaN
A0A6N4CQD1	Uncharacterized protein	ASJ32_22010	SP(Sec/SPI)	Unknown	D	Protein of unknown function (DUF3450)	Chromosome	22.2787	23.0446	23.9024	NaN	24.2691	23.3178	23.1797	23.5587	23.632	NaN	22.1022	NaN	22.2987	24.5888	23.3476	NaN	23.1397	NaN	23.0797	22.3432	25.4036	24.8731	24.4712	24.7819	21.0368	NaN	22.5139	20.1834	23.6156	23.9279	23.184	22.0638	NaN	NaN	NaN	NaN	NaN	NaN	NaN	NaN	NaN	NaN
A0A6N4CQD4	Uracil-DNA glycosylase (UDG) (EC 3.2.2.27)	ung ASJ32_08495	OTHER	Cytoplasmic	L	Excises uracil residues from the DNA which can arise as a result of misincorporation of dUMP residues by DNA polymerase or due to deamination of cytosine	Chromosome	23.2568	23.8448	23.4859	23.1423	23.3805	22.9583	24.4973	23.8317	22.6055	22.564	NaN	22.1487	23.3182	21.5995	22.4868	23.2995	25.197	23.7231	24.5373	23.9952	25.8628	25.66	24.9095	24.8874	24.4677	25.5441	22.9618	24.3718	24.5517	23.4855	NaN	22.6117	NaN	NaN	NaN	NaN	NaN	NaN	NaN	NaN	NaN	NaN
A0A6N4CQD5	Outer-membrane lipoprotein LolB	lolB ASJ32_21410 GO994_16995	LIPO(Sec/SPII)	Unknown	M	Plays a critical role in the incorporation of lipoproteins in the outer membrane after they are released by the LolA protein	Chromosome	NaN	NaN	NaN	NaN	NaN	NaN	NaN	NaN	NaN	NaN	NaN	NaN	NaN	NaN	NaN	NaN	22.2812	NaN	24.6656	24.1058	23.1635	22.3317	21.9642	22.4386	24.4002	21.9197	24.5032	23.2223	24.0848	23.258	23.5788	22.9347	NaN	NaN	NaN	NaN	NaN	NaN	NaN	NaN	NaN	NaN
A0A6N4CQD7	Tyrosine--tRNA ligase (EC 6.1.1.1) (Tyrosyl-tRNA synthetase) (TyrRS)	tyrS ASJ32_08375 GO994_16780	OTHER	Cytoplasmic	J	Catalyzes the attachment of tyrosine to tRNA(Tyr) in a two-step reaction tyrosine is first activated by ATP to form Tyr- AMP and then transferred to the acceptor end of tRNA(Tyr)	Chromosome	25.9198	26.2803	25.2125	25.2056	25.8115	25.0236	25.5815	26.0272	24.8575	24.5747	22.7172	24.3939	25.7991	26.2893	23.1641	25.2006	26.3467	24.8537	26.4907	24.8265	26.4877	26.6141	26.0776	25.7795	26.0142	26.1965	25.0033	25.2119	26.0049	25.3949	22.2577	25.4614	NaN	NaN	NaN	NaN	NaN	NaN	NaN	NaN	NaN	NaN
A0A6N4CQD8	MSHA biogenesis protein MshO	ASJ32_06305	OTHER	Unknown	NU	Prokaryotic N-terminal methylation motif	Chromosome	NaN	NaN	NaN	NaN	NaN	NaN	NaN	NaN	NaN	NaN	NaN	NaN	NaN	NaN	NaN	NaN	22.1515	NaN	21.9528	23.1177	22.1424	21.683	21.9955	21.6309	22.2441	22.6047	22.7989	22.3716	22.4011	23.1018	23.4967	22.6518	NaN	NaN	NaN	NaN	NaN	NaN	NaN	NaN	NaN	NaN
A0A6N4CQE0	Uncharacterized protein	ASJ32_07110	OTHER	Unknown	Q	Domain of unknown function (DUF4442)	Chromosome	NaN	NaN	NaN	NaN	NaN	NaN	NaN	NaN	NaN	NaN	NaN	NaN	NaN	NaN	NaN	NaN	NaN	NaN	21.9803	NaN	NaN	22.7973	21.7386	NaN	21.7275	NaN	22.5972	NaN	22.7563	22.7363	21.7356	NaN	NaN	NaN	NaN	NaN	NaN	NaN	NaN	NaN	NaN	NaN
A0A6N4CQE4	Serine acetyltransferase (EC 2.3.1.30)	cysE ASJ32_19105 GO994_00610	OTHER	Cytoplasmic	E	serine acetyltransferase	Chromosome	25.3144	24.8424	25.7438	25.9032	25.7581	25.7066	26.0098	26.169	25.1243	25.8329	25.6054	25.5355	24.976	24.6087	24.9572	25.8924	24.4312	25.2303	24.3738	25.6243	24.9128	25.5138	24.7294	26.5531	24.5063	24.8684	23.9708	25.8328	24.7681	25.9704	24.1743	24.7896	NaN	NaN	NaN	NaN	NaN	NaN	NaN	NaN	NaN	NaN
A0A6N4CQE5	DUF429 domain-containing protein (PhaC PHA synthase)	ASJ32_07140 GO994_11095	OTHER	Unknown	S	Protein of unknown function (DUF429)	Chromosome	21.8643	21.376	22.5104	22.3996	22.1515	22.7357	22.5634	21.9741	21.7714	22.9975	22.0334	22.2162	21.4714	20.1121	NaN	22.1756	23.6681	25.3073	23.4391	23.4764	23.6037	23.8332	23.9019	24.8728	23.7494	24.9189	23.7651	24.2785	23.3138	23.7876	22.6203	24.4319	NaN	NaN	NaN	NaN	NaN	NaN	NaN	NaN	NaN	NaN
A0A6N4CQF5	Glutathione synthetase (EC 6.3.2.3) (GSH synthetase) (GSH-S) (GSHase) (Glutathione synthase)	gshB ASJ32_08425 GO994_16850	OTHER	Cytoplasmic	H	Belongs to the prokaryotic GSH synthase family	Chromosome	27.229	27.3938	27.5619	27.6411	27.7842	28.4211	27.7141	27.985	27.1843	26.9399	26.8621	27.2751	27.5048	28.522	26.5373	26.5885	25.2322	26.6683	26.0672	24.961	25.2335	26.2166	25.3051	25.5008	25.7413	25.9846	24.7616	24.4401	25.6552	26.2613	22.798	25.4706	NaN	19.2991	19.3244	NaN	NaN	NaN	NaN	NaN	NaN	NaN
A0A6N4CQF9	Cell division ATP-binding protein FtsE	ftsE ASJ32_06405 GO994_02970	OTHER	CytoplasmicMembrane	D	cell division ATP-binding protein FtsE	Chromosome	NaN	NaN	NaN	NaN	NaN	NaN	NaN	NaN	NaN	NaN	NaN	NaN	NaN	NaN	NaN	NaN	26.0629	25.6242	25.324	25.4559	25.0867	24.9008	24.4849	24.7358	25.098	24.7279	25.8722	25.5408	24.5574	24.7983	24.2181	24.9981	16.568	16.7731	NaN	NaN	16.7516	NaN	16.6015	NaN	NaN	16.7819
A0A6N4CQG0	GNAT family acetyltransferase	ASJ32_07160	OTHER	Unknown	K	histone acetyltransferase HPA2 and related acetyltransferases	Chromosome	21.6725	21.1817	22.5691	20.7451	22.4844	23.2853	23.8098	22.3796	NaN	21.9585	NaN	21.6116	22.0134	NaN	NaN	22.4824	20.3245	NaN	NaN	NaN	NaN	NaN	NaN	21.0115	NaN	NaN	NaN	NaN	NaN	NaN	NaN	NaN	NaN	NaN	NaN	NaN	NaN	NaN	NaN	NaN	NaN	NaN
A0A6N4CQG1	Uncharacterized protein	ASJ32_08605	OTHER	Unknown	-	-	Chromosome	24.8744	25.5319	26.4528	25.6085	24.8815	25.3287	24.9264	25.4347	25.3374	25.2564	26.2241	25.1923	24.454	25.5638	25.886	24.7949	22.5267	23.6303	23.9546	23.5267	22.5657	22.6523	22.7447	23.135	23.694	23.1025	24.3761	23.503	23.448	23.2281	22.5728	23.0223	NaN	NaN	NaN	NaN	NaN	NaN	NaN	NaN	NaN	NaN
A0A6N4CQG2	Phage portal protein	ASJ32_21850	OTHER	Unknown	S	Phage portal protein	Chromosome	NaN	NaN	NaN	NaN	NaN	NaN	NaN	NaN	NaN	NaN	NaN	NaN	NaN	NaN	NaN	NaN	NaN	NaN	NaN	NaN	NaN	NaN	NaN	NaN	NaN	NaN	NaN	NaN	NaN	NaN	NaN	NaN	NaN	NaN	NaN	NaN	NaN	NaN	NaN	NaN	NaN	NaN
A0A6N4CQH0	Uncharacterized protein	ASJ32_22525	OTHER	Unknown	-	-	Chromosome	NaN	NaN	NaN	22.7576	NaN	NaN	21.7693	22.02	NaN	NaN	NaN	21.3381	NaN	NaN	21.5682	21.1458	NaN	NaN	22.4697	22.2459	22.7058	21.6826	23.3773	22.2261	NaN	NaN	NaN	NaN	NaN	NaN	NaN	21.6038	NaN	NaN	NaN	NaN	NaN	NaN	NaN	NaN	NaN	NaN
A0A6N4CQH1	Probable lipopolysaccharide assembly protein A	lapA ASJ32_21130 GO994_13860	OTHER	CytoplasmicMembrane	S	involved in the assembly of lipopolysaccharide (LPS)	Chromosome	NaN	NaN	NaN	NaN	NaN	NaN	NaN	NaN	NaN	NaN	NaN	NaN	NaN	NaN	NaN	NaN	20.1303	24.6332	NaN	24.6894	NaN	22.3989	23.1181	23.9613	NaN	21.9457	21.8757	21.9895	NaN	NaN	23.7125	23.4855	NaN	NaN	NaN	NaN	NaN	NaN	NaN	NaN	NaN	NaN
A0A6N4CQH8	Helix-turn-helix domain-containing protein (XRE family transcriptional regulator)	ASJ32_18835 GO994_21125	OTHER	Cytoplasmic	K	Transcriptional regulator	Chromosome	NaN	NaN	NaN	NaN	NaN	NaN	NaN	NaN	NaN	NaN	NaN	NaN	NaN	NaN	NaN	NaN	23.1498	NaN	22.4869	21.8813	24.1647	23.9501	24.3803	23.5811	22.1164	21.5848	22.9022	21.9067	21.5364	22.5252	NaN	22.1904	NaN	NaN	NaN	NaN	NaN	NaN	NaN	NaN	NaN	NaN
A0A6N4CQI9	50S ribosomal protein L1	rplA ASJ32_07330 GO994_01665	OTHER	Cytoplasmic	J	Binds directly to 23S rRNA. The L1 stalk is quite mobile in the ribosome, and is involved in E site tRNA release	Chromosome	31.148	31.5041	31.739	31.6505	30.8827	31.1022	30.3195	30.9555	32.0952	32.1242	32.8034	32.0086	31.3963	31.4096	32.6407	31.7048	30.3488	31.6697	30.9872	30.2179	29.8728	30.8639	29.9198	30.6355	31.3386	31.5037	30.9584	31.1813	30.7296	30.5374	30.3788	29.667	21.5218	23.7892	23.4166	23.4002	23.4821	22.577	24.1711	22.0004	23.3472	25.052
A0A6N4CQJ0	ABC transporter (ATP-binding cassette domain-containing protein)	ASJ32_03675 GO994_18475	OTHER	CytoplasmicMembrane	P	ABC transporter	Chromosome	22.122	21.6883	22.3681	22.1811	22.6707	21.3708	21.3565	21.5979	21.5365	21.9508	21.9984	21.9355	21.5136	21.6605	21.602	21.1431	23.3752	24.4479	23.1863	23.8491	22.8491	23.1758	23.1816	23.8459	23.3655	23.4716	23.8843	23.6718	23.3735	23.343	23.3578	24.0751	NaN	NaN	NaN	NaN	NaN	NaN	NaN	NaN	NaN	NaN
A0A6N4CQJ7	Rrf2 family transcriptional regulator (Transcriptional regulator)	ASJ32_03725 GO994_18425	OTHER	Unknown	K	Transcriptional regulator	Chromosome	NaN	NaN	NaN	NaN	NaN	NaN	NaN	NaN	NaN	NaN	NaN	NaN	NaN	NaN	NaN	NaN	22.9265	NaN	22.5374	23.1042	22.6888	22.6402	23.7855	23.5975	21.5816	NaN	22.7622	23.5145	NaN	23.3594	NaN	23.0875	NaN	NaN	NaN	NaN	NaN	NaN	NaN	NaN	NaN	NaN
A0A6N4CQJ8	DNA topoisomerase 3 (EC 5.6.2.1) (DNA topoisomerase III)	topB ASJ32_07395	OTHER	Cytoplasmic	L	Releases the supercoiling and torsional tension of DNA, which is introduced during the DNA replication and transcription, by transiently cleaving and rejoining one strand of the DNA duplex. Introduces a single-strand break via transesterification at a target site in duplex DNA. The scissile phosphodiester is attacked by the catalytic tyrosine of the enzyme, resulting in the formation of a DNA-(5'…	Chromosome	22.6278	22.4362	24.1504	23.7439	23.4356	22.3696	22.4207	23.7772	23.8762	23.2558	24.5228	24.117	23.4241	24.1237	24.2755	23.4611	23.2548	24.712	23.1584	24.2147	22.5763	22.9885	23.1988	22.958	23.4287	23.563	23.1997	23.5933	22.7562	22.8978	23.4653	22.9116	NaN	NaN	NaN	NaN	NaN	NaN	NaN	NaN	NaN	NaN
A0A6N4CQK0	Methionine gamma-lyase (EC 4.4.1.11)	ASJ32_06785	OTHER	Cytoplasmic	E	Catalyzes the formation of L-homocysteine from O- succinyl-L-homoserine (OSHS) and hydrogen sulfide	Chromosome	26.1084	26.2744	27.0631	25.9748	26.1599	26.0655	25.7622	26.3452	26.2786	26.2687	25.9405	25.3651	25.878	25.5606	25.332	24.8691	24.1391	24.1639	26.3177	23.6091	23.6755	24.6885	22.03	23.7629	26.0711	24.1187	24.7923	23.5486	26.2079	26.0035	22.762	21.9143	NaN	NaN	NaN	NaN	NaN	17.8715	NaN	18.631	NaN	18.5983
A0A6N4CQK1	Glycogen debranching protein	ASJ32_18510	OTHER	Cytoplasmic	G	Belongs to the glycosyl hydrolase 13 family	Chromosome	24.4081	24.8604	24.5647	23.2332	24.1709	24.3917	24.16	24.237	24.9659	23.4837	24.9382	24.0452	24.4092	24.569	24.499	22.0544	22.7401	NaN	24.9414	23.4997	23.5509	23.7509	23.3546	NaN	24.7946	21.9714	23.8873	NaN	23.8573	23.2799	NaN	21.053	NaN	NaN	NaN	NaN	NaN	NaN	NaN	NaN	NaN	NaN
A0A6N4CQK4	Aspartate--tRNA ligase (EC 6.1.1.12) (Aspartyl-tRNA synthetase) (AspRS)	aspS ASJ32_21045	OTHER	Cytoplasmic	J	Catalyzes the attachment of L-aspartate to tRNA(Asp) in a two-step reaction L-aspartate is first activated by ATP to form Asp-AMP and then transferred to the acceptor end of tRNA(Asp)	Chromosome	26.5985	25.5567	25.6682	25.8729	27.0111	25.7771	25.4612	24.6923	26.0834	24.7908	25.4703	25.005	26.4565	27.4113	24.677	25.2119	27.6128	26.7054	27.5309	26.1434	27.4197	27.6212	28.0051	27.2333	27.368	27.8706	26.7582	27.3161	27.7523	27.1604	27.0362	27.5283	NaN	NaN	NaN	NaN	NaN	NaN	NaN	NaN	NaN	NaN
A0A6N4CQK5	Phosphoenolpyruvate--protein phosphotransferase (EC 2.7.3.9)	ASJ32_03780	OTHER	Cytoplasmic	T	Belongs to the PEP-utilizing enzyme family	Chromosome	22.0662	20.4818	18.9024	22.2042	23.6448	22.0178	23.467	22.511	19.8798	20.4786	20.5703	21.4643	20.2586	NaN	19.9748	21.4214	24.5182	24.3097	24.1001	24.0571	24.7747	24.746	24.7507	24.7585	24.2309	24.7272	23.7955	24.5548	24.5188	24.2821	23.7953	24.7037	NaN	NaN	NaN	NaN	NaN	NaN	NaN	NaN	NaN	NaN
A0A6N4CQK6	Molybdopterin-synthase adenylyltransferase	ASJ32_06130	OTHER	Cytoplasmic	H	thiazole biosynthesis adenylyltransferase ThiF	Chromosome	22.4476	21.1998	21.723	23.1768	21.827	NaN	21.3272	22.2919	NaN	21.7158	NaN	22.4189	21.4957	21.4585	NaN	22.1992	24.4653	25.1143	24.1409	25.014	24.2825	24.8733	24.8097	24.6267	23.6713	24.9181	21.7712	24.0765	24.416	24.1191	24.0361	25.2722	NaN	NaN	NaN	NaN	NaN	NaN	NaN	NaN	NaN	NaN
A0A6N4CQK9	Elongation factor G (EF-G)	fusA ASJ32_07270 GO994_01725	OTHER	Cytoplasmic	J	Catalyzes the GTP-dependent ribosomal translocation step during translation elongation. During this step, the ribosome changes from the pre-translocational (PRE) to the post- translocational (POST) state as the newly formed A-site-bound peptidyl-tRNA and P-site-bound deacylated tRNA move to the P and E sites, respectively. Catalyzes the coordinated movement of the two tRNA molecules, the mRNA and…	Chromosome	31.0085	31.2158	30.093	30.5056	30.8728	30.9467	30.8428	30.8513	30.8533	31.1959	30.2922	30.7975	30.888	30.5989	29.4969	30.7202	29.6272	29.7669	29.8549	29.3015	29.7186	29.3936	29.5586	29.1618	29.7665	29.9488	29.8294	29.4748	30.2125	29.8012	29.7675	29.7204	22.5493	22.254	22.4801	22.4694	21.466	21.5605	21.952	22.2369	22.364	23.6875
A0A6N4CQL1	TetR family transcriptional regulator	ASJ32_18565 GO994_17835	OTHER	Cytoplasmic	K	transcriptional regulator	Chromosome	25.4841	24.9749	24.7023	25.3401	25.272	24.4167	25.2846	25.449	23.6757	24.6235	24.6273	24.7446	26.0022	24.9864	24.5607	24.5278	27.548	27.4243	27.2283	27.105	27.7947	27.321	28.4928	27.4836	26.5408	27.661	27.3289	26.8596	27.4372	25.998	26.7376	27.7388	NaN	NaN	NaN	NaN	17.1332	NaN	NaN	NaN	NaN	NaN
A0A6N4CQL3	Hemolysin D	ASJ32_20940	LIPO(Sec/SPII)	CytoplasmicMembrane	M	Belongs to the membrane fusion protein (MFP) (TC 8.A.1) family	Chromosome	22.3897	22.4484	23.7282	23.384	23.9676	23.8596	24.0626	24.374	21.7291	21.4568	22.3706	23.1555	21.7632	22.0326	23.2223	23.1849	25.2363	25.3736	25.1235	26.1592	26.1027	26.2292	26.3378	26.3867	24.5351	24.5301	24.8388	25.4118	24.3834	24.9649	25.9293	25.2983	NaN	NaN	NaN	NaN	NaN	NaN	NaN	NaN	NaN	NaN
A0A6N4CQL4	GCN5 family acetyltransferase	ASJ32_06185	OTHER	Cytoplasmic	J	COG1670 Acetyltransferases, including N-acetylases of ribosomal proteins	Chromosome	21.8579	NaN	NaN	NaN	23.2775	NaN	21.344	NaN	NaN	NaN	NaN	NaN	NaN	NaN	NaN	22.2339	24.6482	24.233	24.068	24.5311	25.4308	25.1789	25.7894	25.6595	24.0612	24.4361	24.0012	24.5912	24.0511	23.9842	24.0309	25.2451	NaN	NaN	NaN	NaN	NaN	NaN	NaN	NaN	NaN	NaN
A0A6N4CQL6	Chaperone protein ClpB	clpB ASJ32_07495	OTHER	Cytoplasmic	O	Part of a stress-induced multi-chaperone system, it is involved in the recovery of the cell from heat-induced damage, in cooperation with DnaK, DnaJ and GrpE	Chromosome	25.2415	24.688	24.8325	25.6256	26.5602	26.5552	25.997	26.0326	24.7698	24.3939	24.6145	24.7753	25.6842	26.191	25.2273	26.1623	24.3539	25.5047	24.6498	23.5731	24.3729	26.2456	26.8019	26.5265	24.0772	25.2481	23.737	24.8558	26.2094	25.5626	25.5372	26.4948	NaN	NaN	NaN	NaN	NaN	NaN	NaN	NaN	NaN	NaN
A0A6N4CQL8	50S ribosomal protein L7/L12	rplL ASJ32_07320 GO994_01675	OTHER	Cytoplasmic	J	Forms part of the ribosomal stalk which helps the ribosome interact with GTP-bound translation factors. Is thus essential for accurate translation	Chromosome	26.9337	26.2843	25.7626	25.7	26.2669	26.1456	25.8747	25.3368	27.205	26.248	27.8716	25.4085	27.2278	27.8363	27.3014	25.6716	NaN	24.2124	25.2018	NaN	24.4307	22.3127	22.5132	22.7804	24.8641	22.9252	22.8499	22.1071	24.346	24.6972	23.8767	22.3027	NaN	NaN	NaN	NaN	18.2925	NaN	18.3876	NaN	NaN	NaN
A0A6N4CQM0	50S ribosomal protein L16 arginine hydroxylase (Cupin domain-containing protein)	ASJ32_21515 GO994_07825	OTHER	Cytoplasmic	S	A domain family that is part of the cupin metalloenzyme superfamily.	Chromosome	27.3845	27.5749	27.0799	27.1345	27.2692	27.0139	26.6866	27.7217	26.9197	27.2775	27.97	27.7088	27.0699	26.34	25.8007	26.9984	23.5327	NaN	23.6781	24.2743	23.6075	24.0251	22.9997	23.7464	24.0318	24.2681	22.9491	24.428	23.2191	24.1795	24.1264	23.8146	NaN	NaN	NaN	NaN	NaN	NaN	NaN	NaN	NaN	NaN
A0A6N4CQM1	Aldehyde reductase	ASJ32_07550	OTHER	Cytoplasmic	C	alcohol dehydrogenase	Chromosome	22.6897	24.0741	22.7971	NaN	22.5258	NaN	23.1616	NaN	21.9254	21.9753	NaN	NaN	23.5721	23.5093	NaN	NaN	22.2331	NaN	21.5693	NaN	22.2723	NaN	NaN	21.0776	22.819	NaN	21.4288	NaN	21.789	NaN	NaN	NaN	NaN	NaN	NaN	NaN	NaN	NaN	NaN	NaN	NaN	NaN
A0A6N4CQM2	Anthranilate synthase subunit II	ASJ32_20995	OTHER	Cytoplasmic	EH	Anthranilate synthase	Chromosome	23.9257	24.5491	NaN	23.5608	24.7621	25.0674	24.7274	24.3583	24.107	24.2823	NaN	24.1775	24.3173	NaN	NaN	24.5908	23.5614	NaN	23.5986	NaN	24.3533	23.8657	24.8086	NaN	NaN	23.348	NaN	NaN	23.5467	23.7172	NaN	NaN	NaN	NaN	NaN	NaN	NaN	NaN	NaN	NaN	NaN	NaN
A0A6N4CQM4	Glutamine-dependent NAD(+) synthetase (EC 6.3.5.1) (NAD(+) synthase [glutamine-hydrolyzing])	nadE ASJ32_03885	SP(Sec/SPI)	Cytoplasmic	H	Catalyzes the ATP-dependent amidation of deamido-NAD to form NAD. Uses L-glutamine as a nitrogen source	Chromosome	25.143	25.4725	25.5818	24.4504	25.3263	25.2963	25.0954	24.9892	25.3045	24.9972	24.6809	24.8631	25.3143	26.2103	23.8062	25.0167	23.3336	NaN	23.783	23.2338	22.7817	23.4095	21.5446	22.3707	24.4546	22.8374	23.7695	22.509	24.3199	25.5713	23.0174	23.4401	NaN	NaN	NaN	NaN	NaN	NaN	NaN	NaN	NaN	NaN
A0A6N4CQM6	Sugar fermentation stimulation protein homolog	sfsA ASJ32_18620 GO994_17780	OTHER	Cytoplasmic	S	Belongs to the SfsA family	Chromosome	NaN	NaN	NaN	22.0943	23.3192	23.3934	23.0679	22.886	NaN	NaN	NaN	23.1051	22.145	NaN	22.8005	NaN	24.3158	22.8319	20.7792	24.2481	25.264	24.4011	24.2996	23.9882	21.7367	22.9202	21.2913	21.1756	22.8092	20.9544	NaN	23.8698	NaN	NaN	NaN	NaN	NaN	NaN	NaN	NaN	NaN	NaN
A0A6N4CQM7	Potassium transporter KtrA	ASJ32_07385	SP(Sec/SPI)	Cytoplasmic	P	TrkA-N domain	Chromosome	22.6205	22.9168	22.7456	NaN	23.1138	22.0031	21.9418	21.7552	22.7443	NaN	22.8317	NaN	21.7973	22.8713	22.9332	NaN	NaN	NaN	NaN	NaN	NaN	NaN	NaN	NaN	NaN	NaN	NaN	NaN	NaN	NaN	NaN	NaN	NaN	NaN	NaN	NaN	NaN	NaN	NaN	NaN	NaN	NaN
A0A6N4CQM8	MSHA biogenesis protein MshQ	ASJ32_06295	SP(Sec/SPI)	Unknown	U	calcium- and calmodulin-responsive adenylate cyclase activity	Chromosome	21.5522	20.2132	22.0843	21.0942	22.395	22.674	22.5645	22.327	21.5737	22.3258	NaN	NaN	21.8299	21.8547	NaN	21.6452	NaN	23.9027	23.1973	25.3794	NaN	NaN	NaN	NaN	NaN	NaN	NaN	24.3967	NaN	NaN	24.3477	23.4865	NaN	17.6844	17.6718	18.6203	16.7738	NaN	NaN	NaN	NaN	17.7168
A0A6N4CQM9	Ornithine carbamoyltransferase (OTCase) (EC 2.1.3.3)	argF ASJ32_07605 GO994_01375	OTHER	Cytoplasmic	E	Reversibly catalyzes the transfer of the carbamoyl group from carbamoyl phosphate (CP) to the N(epsilon) atom of ornithine (ORN) to produce L-citrulline	Chromosome	22.7263	22.8033	23.1115	22.2663	23.0465	23.355	22.8236	23.4495	22.948	22.4059	22.319	22.3321	22.777	22.451	23.2337	22.3514	NaN	NaN	NaN	NaN	NaN	NaN	NaN	NaN	NaN	NaN	NaN	NaN	NaN	NaN	NaN	NaN	NaN	NaN	NaN	NaN	NaN	NaN	NaN	NaN	NaN	NaN
A0A6N4CQN1	Glutamyl-tRNA reductase (GluTR) (EC 1.2.1.70)	hemA ASJ32_21415	OTHER	Cytoplasmic	H	Catalyzes the NADPH-dependent reduction of glutamyl- tRNA(Glu) to glutamate 1-semialdehyde (GSA)	Chromosome	NaN	NaN	NaN	NaN	NaN	NaN	NaN	NaN	NaN	NaN	NaN	NaN	NaN	NaN	NaN	NaN	23.9111	23.9958	23.5322	23.6675	24.1426	23.24	23.0892	22.3162	24.6126	24.4188	24.4786	24.7655	24.3617	24.0077	24.6439	24.0751	NaN	NaN	NaN	NaN	NaN	NaN	NaN	NaN	NaN	NaN
A0A6N4CQN3	Transcriptional regulator	ASJ32_06940	OTHER	Cytoplasmic	GK	ROK family	Chromosome	NaN	NaN	NaN	NaN	NaN	NaN	NaN	NaN	NaN	NaN	NaN	NaN	NaN	NaN	NaN	NaN	21.8244	NaN	21.5147	21.4315	NaN	NaN	NaN	NaN	21.132	NaN	21.6202	NaN	NaN	NaN	NaN	21.7687	NaN	NaN	NaN	NaN	NaN	NaN	NaN	NaN	NaN	NaN
A0A6N4CQN5	Crossover junction endodeoxyribonuclease RuvC (EC 3.1.22.4) (Holliday junction nuclease RuvC) (Holliday junction resolvase RuvC)	ruvC ASJ32_08005	OTHER	Cytoplasmic	L	Nuclease that resolves Holliday junction intermediates in genetic recombination. Cleaves the cruciform structure in supercoiled DNA by nicking to strands with the same polarity at sites symmetrically opposed at the junction in the homologous arms and leaves a 5'-terminal phosphate and a 3'-terminal hydroxyl group	Chromosome	NaN	NaN	NaN	NaN	NaN	NaN	NaN	NaN	NaN	NaN	NaN	NaN	NaN	NaN	NaN	NaN	23.6919	NaN	23.3385	23.473	22.9315	23.0397	23.5935	21.9798	23.4354	23.2838	23.6298	22.8844	22.9676	22.8709	22.8032	23.3806	NaN	NaN	NaN	NaN	NaN	NaN	NaN	NaN	NaN	NaN
A0A6N4CQP2	Transcriptional regulator (Transcriptional regulator AsnC)	asnC ASJ32_07485 GO994_01495	OTHER	Cytoplasmic	K	helix_turn_helix ASNC type	Chromosome	NaN	NaN	NaN	NaN	NaN	NaN	NaN	NaN	NaN	NaN	NaN	NaN	NaN	NaN	NaN	NaN	21.6463	NaN	21.8255	NaN	21.3901	21.6559	21.6453	NaN	21.6524	NaN	21.5097	NaN	21.5617	21.6645	NaN	21.2054	NaN	NaN	NaN	NaN	NaN	NaN	NaN	NaN	NaN	NaN
A0A6N4CQP3	ATP-dependent 6-phosphofructokinase (ATP-PFK) (Phosphofructokinase) (EC 2.7.1.11) (Phosphohexokinase)	pfkA ASJ32_21310 GO994_12315	OTHER	Cytoplasmic	F	Catalyzes the phosphorylation of D-fructose 6-phosphate to fructose 1,6-bisphosphate by ATP, the first committing step of glycolysis	Chromosome	27.657	28.0721	27.8156	27.7482	28.0282	28.4951	28.3439	28.2707	27.3654	27.815	26.9171	27.0453	27.535	27.2588	26.5162	27.4498	26.5759	26.3872	27.0925	26.6252	27.0381	27.5149	26.8187	27.741	26.7614	26.7816	26.2879	26.4264	27.2739	27.5236	25.479	26.5326	NaN	19.1913	17.441	18.099	19.2443	18.9031	NaN	18.9213	NaN	19.2094
A0A6N4CQP5	RNA polymerase sigma factor RpoH (RNA polymerase sigma-32 factor)	rpoH ASJ32_06395 GO994_02960	OTHER	Cytoplasmic	K	RNA polymerase sigma	Chromosome	24.1216	24.4574	NaN	23.9406	24.1167	NaN	24.8142	24.3545	25.0355	NaN	NaN	26.3135	24.9041	24.3418	NaN	NaN	NaN	NaN	22.1037	21.2542	21.7824	NaN	NaN	NaN	NaN	NaN	NaN	NaN	NaN	NaN	NaN	NaN	NaN	NaN	NaN	NaN	NaN	NaN	NaN	NaN	NaN	NaN
A0A6N4CQP6	Patatin (Patatin-like phospholipase RssA)	rssA ASJ32_08060 GO994_15225	OTHER	Extracellular	M	esterase of the alpha-beta hydrolase superfamily	Chromosome	23.4811	23.5374	24.7686	24.0008	23.4953	23.1115	23.7098	24.4581	22.7179	23.141	23.5133	23.3685	23.2522	24.0425	24.5195	23.7136	23.6401	25.0361	24.3447	24.3669	24.2565	24.1416	24.6652	24.4252	23.2849	23.6697	24.2229	24.1703	24.2707	24.2741	24.9684	25.1327	NaN	NaN	NaN	NaN	NaN	NaN	NaN	NaN	NaN	NaN
A0A6N4CQP7	NAD(P) transhydrogenase subunit beta (EC 7.1.1.1) (Nicotinamide nucleotide transhydrogenase subunit beta)	pntB ASJ32_07540 GO994_01440	OTHER	CytoplasmicMembrane	C	The transhydrogenation between NADH and NADP is coupled to respiration and ATP hydrolysis and functions as a proton pump across the membrane	Chromosome	NaN	NaN	NaN	NaN	NaN	NaN	NaN	25.1354	NaN	NaN	NaN	NaN	NaN	NaN	27.4836	NaN	28.7881	27.1259	29.0246	27.8149	28.9004	28.3159	27.7299	27.5108	28.592	27.2731	29.1153	27.7936	28.9381	29.0206	28.9287	28.3208	NaN	NaN	NaN	NaN	19.7412	NaN	NaN	NaN	NaN	NaN
A0A6N4CQQ2	ABC transporter	ASJ32_20750	OTHER	CytoplasmicMembrane	V	ABC-type multidrug transport system, permease component	Chromosome	NaN	NaN	NaN	NaN	NaN	NaN	NaN	NaN	NaN	NaN	NaN	NaN	NaN	NaN	NaN	NaN	NaN	NaN	NaN	NaN	NaN	NaN	NaN	NaN	NaN	NaN	NaN	NaN	NaN	NaN	NaN	NaN	NaN	NaN	NaN	NaN	NaN	NaN	NaN	NaN	NaN	NaN
A0A6N4CQQ3	Aminodeoxychorismate synthase (EC 2.6.1.85)	pabB ASJ32_07050	OTHER	Cytoplasmic	EH	chorismate binding enzyme	Chromosome	21.9291	22.2194	23.304	22.0109	22.7404	22.3526	23.2935	22.6184	22.6888	23.851	23.624	22.8039	22.0675	NaN	NaN	22.6167	21.4204	NaN	NaN	22.4042	22.4974	23.3003	22.7512	22.5798	NaN	23.3491	NaN	22.1873	21.3613	NaN	NaN	21.9291	NaN	NaN	NaN	NaN	NaN	NaN	NaN	NaN	NaN	NaN
A0A6N4CQQ4	DUF218 domain-containing protein	ASJ32_21320	OTHER	CytoplasmicMembrane	S	DUF218 domain	Chromosome	NaN	NaN	NaN	NaN	NaN	NaN	NaN	NaN	NaN	NaN	NaN	NaN	NaN	NaN	NaN	NaN	22.2966	21.3375	21.7546	23.0174	22.598	22.3998	22.1823	22.3537	21.4162	22.314	NaN	22.6372	22.3234	22.1111	22.9136	23.7054	NaN	NaN	NaN	NaN	NaN	NaN	NaN	NaN	NaN	NaN
A0A6N4CQQ6	C4-dicarboxylate ABC transporter substrate-binding protein	ASJ32_06510	SP(Sec/SPI)	Unknown	S	NMT1-like family	Chromosome	26.695	27.1767	26.5721	26.1953	27.314	27.3143	27.5647	26.9012	25.766	26.4907	25.7549	25.7063	26.5276	26.4266	25.9119	26.1927	23.3868	21.3502	23.3259	23.7894	22.5742	23.3495	23.2417	22.4352	22.7013	22.808	23.3673	22.4786	23.7545	23.3927	22.4634	23.7173	NaN	NaN	NaN	NaN	NaN	NaN	NaN	NaN	NaN	NaN
A0A6N4CQQ7	Holliday junction ATP-dependent DNA helicase RuvA (EC 3.6.4.12)	ruvA ASJ32_04095 GO994_18045	OTHER	Cytoplasmic	L	The RuvA-RuvB complex in the presence of ATP renatures cruciform structure in supercoiled DNA with palindromic sequence, indicating that it may promote strand exchange reactions in homologous recombination. RuvAB is a helicase that mediates the Holliday junction migration by localized denaturation and reannealing. RuvA stimulates, in the presence of DNA, the weak ATPase activity of RuvB	Chromosome	23.8196	23.7164	22.0816	22.8254	23.388	22.7986	21.7175	22.4501	23.6351	21.747	22.7688	22.6165	23.7975	24.3973	22.2894	23.3038	26.0734	24.8752	25.5784	24.2257	25.4313	25.9327	25.0594	25.3576	25.2068	25.0466	25.0984	25.066	25.454	24.4001	24.4169	24.8891	NaN	NaN	NaN	NaN	NaN	NaN	NaN	NaN	NaN	NaN
A0A6N4CQQ8	Uncharacterized protein	ASJ32_18250 GO994_03480	LIPO(Sec/SPII)	Unknown	-	-	Chromosome	NaN	NaN	NaN	NaN	NaN	NaN	NaN	NaN	NaN	NaN	NaN	NaN	NaN	NaN	NaN	NaN	NaN	NaN	20.738	NaN	NaN	NaN	NaN	NaN	NaN	NaN	20.5062	NaN	NaN	NaN	NaN	NaN	NaN	NaN	NaN	NaN	NaN	NaN	NaN	NaN	NaN	NaN
A0A6N4CQQ9	Arginine repressor	argR ASJ32_07595	OTHER	Cytoplasmic	K	Regulates arginine biosynthesis genes	Chromosome	NaN	20.7032	21.5973	21.7532	22.0518	NaN	22.2542	21.5198	NaN	NaN	NaN	NaN	NaN	NaN	NaN	21.8343	21.2405	NaN	21.4104	22.4459	22.1693	22.4823	22.5187	22.7897	NaN	NaN	NaN	21.3636	NaN	20.7737	NaN	21.3433	NaN	NaN	NaN	NaN	NaN	NaN	NaN	NaN	NaN	NaN
A0A6N4CQR0	Protein adenylyltransferase SelO (EC 2.7.7.n1)	selO ASJ32_07780	OTHER	Cytoplasmic	S	Belongs to the UPF0061 (SELO) family	Chromosome	20.6563	NaN	NaN	21.7893	NaN	NaN	NaN	NaN	NaN	21.0845	NaN	NaN	NaN	NaN	NaN	21.603	24.1353	24.3881	23.6159	24.4791	24.8939	24.7089	25.162	25.1891	23.6098	24.1148	23.2086	23.7384	23.9974	23.2265	22.297	24.6959	NaN	NaN	NaN	NaN	NaN	NaN	NaN	NaN	NaN	NaN
A0A6N4CQR3	ATP-binding cassette domain-containing protein (Multidrug ABC transporter ATP-binding protein)	ASJ32_07105 GO994_11060	OTHER	CytoplasmicMembrane	V	ABC transporter transmembrane region	Chromosome	NaN	NaN	NaN	NaN	NaN	NaN	NaN	NaN	NaN	NaN	NaN	NaN	NaN	NaN	NaN	NaN	22.3764	NaN	22.1106	22.1704	21.8788	21.394	21.4642	21.4001	22.5092	21.6642	23.2215	22.2154	22.4934	22.8548	22.0608	22.4546	NaN	NaN	NaN	NaN	NaN	NaN	NaN	NaN	NaN	NaN
A0A6N4CQR5	Single-stranded DNA-binding protein (SSB)	ssb ASJ32_06570 GO994_18835	OTHER	Cytoplasmic	L	Plays an important role in DNA replication, recombination and repair. Binds to ssDNA and to an array of partner proteins to recruit them to their sites of action during DNA metabolism	Chromosome	27.4583	27.7493	27.9168	27.1106	27.4428	27.2272	26.6859	27.4917	27.7194	27.1688	27.4043	26.6914	27.1218	28.7716	26.852	26.7694	24.7409	23.396	24.6503	24.9866	24.4953	25.17	25.0346	25.6341	25.0863	24.9541	24.7513	24.0055	25.3	25.4043	22.4624	24.6492	NaN	NaN	NaN	NaN	NaN	NaN	NaN	NaN	NaN	NaN
A0A6N4CQR8	Tol-Pal system protein TolB	tolB ASJ32_04145	SP(Sec/SPI)	Periplasmic	U	Involved in the TonB-independent uptake of proteins	Chromosome	25.453	25.5654	26.1378	25.1147	25.2181	25.5028	25.3136	25.547	25.7895	25.5991	26.2119	25.2366	25.7377	25.9402	26.3294	24.7077	26.7759	26.233	27.2127	27.1508	27.169	27.0215	27.1688	26.8893	26.7749	26.7021	26.8446	26.7904	26.6591	26.4167	27.0957	27.2707	NaN	17.1289	NaN	NaN	18.604	NaN	18.6513	NaN	NaN	NaN
A0A6N4CQR9	Putrescine-binding periplasmic protein	ASJ32_07835 GO994_20805	SP(Sec/SPI)	Periplasmic	P	Required for the activity of the bacterial periplasmic transport system of putrescine	Chromosome	23.8355	23.7687	23.8322	23.6908	24.165	24.057	24.6555	24.6501	22.8877	23.5688	22.4367	23.1407	23.3703	23.1197	22.2388	23.9587	NaN	NaN	NaN	NaN	NaN	NaN	NaN	NaN	NaN	NaN	NaN	NaN	NaN	NaN	NaN	NaN	NaN	NaN	NaN	NaN	NaN	NaN	NaN	NaN	NaN	NaN
A0A6N4CQS3	Uncharacterized protein	ASJ32_21280	OTHER	Unknown	-	-	Chromosome	NaN	NaN	NaN	NaN	NaN	NaN	NaN	NaN	25.205	NaN	NaN	NaN	22.6222	NaN	NaN	NaN	20.5181	NaN	NaN	NaN	20.9513	NaN	21.2676	NaN	22.2381	21.9046	22.1191	20.98	NaN	NaN	NaN	NaN	NaN	NaN	NaN	NaN	NaN	NaN	NaN	NaN	NaN	NaN
A0A6N4CQS4	Glycerol dehydrogenase (Iron-containing alcohol dehydrogenase)	ASJ32_07155 GO994_11110	OTHER	Cytoplasmic	C	glycerol dehydrogenase	Chromosome	23.643	24.0974	24.0627	22.8904	24.3985	23.7475	24.1242	23.8658	23.8391	21.2302	22.4134	22.3467	24.284	24.2189	23.8209	NaN	25.8399	NaN	27.7887	NaN	26.5269	25.8584	25.9263	NaN	27.3351	NaN	24.35	NaN	26.9596	27.402	NaN	NaN	NaN	NaN	NaN	NaN	NaN	NaN	NaN	NaN	NaN	NaN
A0A6N4CQS5	ATP-dependent protease subunit HslV (EC 3.4.25.2)	hslV ASJ32_07715 GO994_20920	OTHER	Cytoplasmic	O	Protease subunit of a proteasome-like degradation complex believed to be a general protein degrading machinery	Chromosome	27.4512	27.8269	27.278	27.8236	27.811	28.014	27.9342	28.732	27.9076	27.1793	27.413	27.1204	27.4995	27.1476	28.2174	27.6746	22.8835	NaN	NaN	NaN	24.1037	24.7124	23.3882	24.5177	NaN	NaN	NaN	NaN	23.4964	NaN	NaN	23.0074	NaN	NaN	NaN	NaN	NaN	NaN	NaN	NaN	NaN	NaN
A0A6N4CQS6	ATP-dependent DNA helicase Rep (EC 3.6.4.12)	rep ASJ32_13690	OTHER	Cytoplasmic	L	it can initiate unwinding at a nick in the DNA. It binds to the single-stranded DNA and acts in a progressive fashion along the DNA in the 3' to 5' direction	Chromosome	23.1348	23.7782	NaN	NaN	NaN	NaN	NaN	NaN	23.312	NaN	NaN	NaN	24.3801	NaN	NaN	NaN	27.9397	27.8558	27.8229	27.988	27.8925	27.6031	27.0767	26.6486	28.0804	27.2167	27.4561	27.9177	27.3833	27.4904	26.1386	27.4336	NaN	NaN	17.7229	17.7945	17.2021	NaN	NaN	NaN	18.2923	18.0914
A0A6N4CQS7	Chemotaxis protein	ASJ32_06630	OTHER	CytoplasmicMembrane	NT	chemotaxis, protein	Chromosome	NaN	NaN	NaN	NaN	NaN	NaN	NaN	NaN	NaN	NaN	NaN	NaN	NaN	NaN	NaN	NaN	22.1128	NaN	22.6816	23.1677	21.0478	NaN	NaN	20.7739	21.4715	21.7786	21.7285	21.6897	22.0808	22.1022	22.8972	21.9477	NaN	NaN	NaN	NaN	NaN	NaN	NaN	NaN	NaN	NaN
A0A6N4CQS9	GNAT family N-acetyltransferase (GNAT family acetyltransferase)	ASJ32_18350 GO994_03370	OTHER	Unknown	K	Acetyltransferase (GNAT) domain	Chromosome	22.3384	21.1491	NaN	NaN	24.5683	NaN	22.0662	21.939	20.822	NaN	NaN	NaN	22.8783	NaN	NaN	19.887	21.7555	NaN	21.5893	NaN	21.422	21.9692	22.5451	NaN	NaN	21.1224	NaN	NaN	NaN	NaN	22.4877	21.4258	NaN	NaN	NaN	NaN	NaN	NaN	NaN	NaN	NaN	NaN
A0A6N4CQT0	Sulfate adenylyltransferase subunit 2 (EC 2.7.7.4) (ATP-sulfurylase small subunit) (Sulfate adenylate transferase) (SAT)	cysD ASJ32_20690 GO994_03655	OTHER	Cytoplasmic	H	COG0175 3'-phosphoadenosine 5'-phosphosulfate sulfotransferase (PAPS reductase) FAD synthetase and related enzymes	Chromosome	27.021	26.9734	26.3683	27.0364	26.7798	26.8007	26.6327	26.6406	26.7767	26.6375	25.9499	26.3167	27.145	27.6724	26.7584	26.6418	26.7287	26.9568	27.6014	26.7582	26.6987	26.7739	27.0784	27.0865	27.0758	26.754	26.3413	26.6137	27.1097	27.23	25.5159	26.66	19.1702	20.3228	21.1183	21.5587	19.5021	19.6228	19.0454	20.2116	21.1305	22.6592
A0A6N4CQT2	Integration host factor subunit beta (IHF-beta)	ihfB himD ASJ32_21135	OTHER	Cytoplasmic	K	This protein is one of the two subunits of integration host factor, a specific DNA-binding protein that functions in genetic recombination as well as in transcriptional and translational control	Chromosome	26.1002	26.5406	26.8392	27.0674	25.5101	27.1974	26.4684	27.1772	26.2854	27.2171	27.1503	27.3922	25.9266	26.1201	27.0006	26.7199	24.22	25.1864	26.0705	25.2792	25.3152	26.2271	25.8861	26.2714	24.8135	24.5472	23.5763	25.2538	24.7084	24.7862	24.9036	25.1498	NaN	NaN	NaN	NaN	NaN	NaN	NaN	NaN	NaN	NaN
A0A6N4CQT3	Phosphate regulon transcriptional regulatory protein PhoB	phoB ASJ32_08215 GO994_15380	OTHER	Cytoplasmic	K	phosphate regulon transcriptional regulatory protein PhoB	Chromosome	21.9657	22.6446	NaN	NaN	23.6488	23.2257	22.0193	22.3799	NaN	NaN	NaN	22.2153	22.8006	21.6225	NaN	23.018	23.6336	NaN	24.0397	NaN	24.5643	24.396	24.8359	24.3707	23.5497	23.772	23.3042	23.1497	22.5743	NaN	NaN	23.4219	NaN	NaN	NaN	NaN	NaN	NaN	NaN	NaN	NaN	NaN
A0A6N4CQT4	Glutathione peroxidase	ASJ32_07205 GO994_11175	OTHER	Cytoplasmic	O	Glutathione peroxidase	Chromosome	24.2651	23.9893	21.7053	23.0617	24.8783	24.5988	25.8283	23.8239	22.962	23.9947	NaN	NaN	23.5563	NaN	22.6859	23.2911	23.1341	NaN	23.2743	22.5033	22.0734	24.7293	25.693	23.9062	22.4638	23.958	NaN	22.9092	23.8314	NaN	NaN	24.1721	NaN	NaN	NaN	NaN	NaN	NaN	NaN	NaN	NaN	NaN
A0A6N4CQT5	ADP-heptose--LPS heptosyltransferase	ASJ32_13750	OTHER	Cytoplasmic	M	Glycosyltransferase family 9 (heptosyltransferase)	Chromosome	NaN	NaN	NaN	NaN	NaN	NaN	NaN	NaN	NaN	NaN	NaN	NaN	NaN	NaN	NaN	NaN	23.5167	23.2673	23.7534	25.0315	23.4995	23.5311	22.7379	23.44	23.3957	23.0316	23.9449	24.0423	23.8719	24.2878	24.1887	23.9466	NaN	NaN	NaN	NaN	NaN	NaN	NaN	NaN	NaN	NaN
A0A6N4CQU1	Restriction endonuclease	ASJ32_18400	OTHER	Cytoplasmic	S	Type I restriction enzyme R protein N terminus (HSDR_N)	Chromosome	22.5462	22.2921	23.4433	23.0397	23.1748	23.1414	23.0439	22.928	NaN	NaN	NaN	NaN	22.4638	23.0724	NaN	NaN	24.5928	21.7509	24.5541	24.319	25.3629	25.6613	26.0562	25.2143	23.6057	23.7191	22.8891	23.4746	24.8289	24.5116	24.0523	24.9316	NaN	NaN	NaN	NaN	NaN	NaN	NaN	NaN	NaN	NaN
A0A6N4CQU2	Thiol:disulfide interchange protein	ASJ32_13800 GO994_21370	SP(Sec/SPI)	Periplasmic	O	Thiol disulfide interchange protein	Chromosome	25.7403	26.0223	26.3879	25.5009	26.4788	26.3947	26.745	26.1201	25.4466	26.4323	26.2025	25.8817	25.1752	26.3208	24.5667	25.5337	26.17	25.5967	25.5984	26.6141	25.462	25.4881	25.3993	25.0001	26.4991	25.6065	26.8968	26.3261	25.7649	26.4091	26.8915	26.071	NaN	NaN	NaN	NaN	NaN	NaN	NaN	NaN	NaN	NaN
A0A6N4CQU4	7-cyano-7-deazaguanine synthase (EC 6.3.4.20) (7-cyano-7-carbaguanine synthase) (PreQ(0) synthase) (Queuosine biosynthesis protein QueC)	queC ASJ32_21105	OTHER	Cytoplasmic	F	Catalyzes the ATP-dependent conversion of 7-carboxy-7- deazaguanine (CDG) to 7-cyano-7-deazaguanine (preQ(0))	Chromosome	23.2723	22.9475	23.0498	23.4638	23.5138	23.1358	23.5666	23.3814	22.5703	23.2419	23.8202	23.4631	22.3994	22.8377	NaN	23.2276	23.7591	24.5143	23.5459	24.0547	23.5443	23.0851	23.6281	24.5554	23.657	24.4902	23.2139	23.8218	23.09	22.9451	24.1727	23.5896	NaN	NaN	NaN	NaN	NaN	NaN	NaN	NaN	NaN	NaN
A0A6N4CQU5	Multidrug transporter	ASJ32_20930	LIPO(Sec/SPII)	OuterMembrane	M	TIGRFAM RND efflux system, outer membrane lipoprotein, NodT family	Chromosome	21.449	NaN	22.6084	22.755	22.9437	23.8745	22.1935	23.2508	21.4836	NaN	23.0764	22.5916	21.7244	NaN	22.9015	22.5321	25.1354	25.6467	25.3525	26.2721	26.4353	26.9286	26.7201	26.9847	25.1316	25.0327	25.549	26.062	25.3953	25.3457	26.2851	25.6726	18.719	17.2268	17.0535	NaN	20.0832	20.6427	18.7223	17.9816	NaN	NaN
A0A6N4CQU7	ABC transporter permease subunit (Spermidine/putrescine ABC transporter permease)	ASJ32_07825 GO994_20815	OTHER	CytoplasmicMembrane	P	Binding-protein-dependent transport system inner membrane component	Chromosome	NaN	NaN	NaN	NaN	NaN	NaN	NaN	NaN	NaN	NaN	NaN	NaN	NaN	NaN	NaN	NaN	NaN	NaN	22.8096	NaN	NaN	NaN	NaN	NaN	21.6331	NaN	22.0485	NaN	NaN	NaN	NaN	21.9551	NaN	NaN	NaN	NaN	NaN	NaN	NaN	NaN	NaN	NaN
A0A6N4CQU9	2-dehydro-3-deoxyphosphooctonate aldolase (EC 2.5.1.55) (3-deoxy-D-manno-octulosonic acid 8-phosphate synthase) (KDO-8-phosphate synthase) (KDO 8-P synthase) (KDOPS) (Phospho-2-dehydro-3-deoxyoctonate aldolase)	kdsA ASJ32_21440	OTHER	Cytoplasmic	M	Belongs to the KdsA family	Chromosome	28.1965	28.2319	27.638	27.8685	28.1022	28.247	27.9509	28.2166	28.1947	28.3132	27.8784	28.2015	28.2303	27.9119	26.9091	28.2447	24.3111	25.5668	24.2429	24.6092	24.0121	24.305	24.0237	24.8512	24.3375	24.4803	23.9691	24.4018	25.123	25.5162	24.5815	23.7899	NaN	NaN	NaN	NaN	NaN	NaN	NaN	NaN	NaN	17.0438
A0A6N4CQV0	Glutathione peroxidase	ASJ32_20575	OTHER	Unknown	S	Protein of unknown function (DUF3297)	Chromosome	25.6902	24.9887	24.3753	25.4521	25.939	24.5446	26.1228	25.3297	24.6964	25.8474	24.7155	25.5735	25.0778	23.9638	24.6051	25.9523	23.1049	NaN	NaN	24.3511	23.2302	23.4968	NaN	23.2971	22.8896	23.3684	22.9501	NaN	22.5599	NaN	NaN	22.7021	NaN	NaN	NaN	NaN	NaN	NaN	NaN	NaN	NaN	NaN
A0A6N4CQV1	SsrA-binding protein (Small protein B)	smpB ASJ32_17830 GO994_07270	OTHER	Unknown	O	Required for rescue of stalled ribosomes mediated by trans-translation. Binds to transfer-messenger RNA (tmRNA), required for stable association of tmRNA with ribosomes. tmRNA and SmpB together mimic tRNA shape, replacing the anticodon stem-loop with SmpB. tmRNA is encoded by the ssrA gene	Chromosome	22.7867	22.178	22.0113	24.2425	24.1265	24.1412	NaN	22.1161	22.6909	NaN	NaN	24.4929	22.9364	24.2296	24.2875	24.044	22.3452	NaN	22.9145	NaN	23.3374	23.5978	23.5766	24.5403	22.4822	21.6179	22.1182	23.2747	22.9759	22.8187	22.3974	22.9069	NaN	NaN	NaN	NaN	18.3618	NaN	NaN	NaN	NaN	NaN
A0A6N4CQV2	Branched-chain-amino-acid aminotransferase (BCAT) (EC 2.6.1.42)	ilvE ASJ32_13860	OTHER	Cytoplasmic	E	Belongs to the class-IV pyridoxal-phosphate-dependent aminotransferase family	Chromosome	27.0447	26.9343	27.5125	27.2795	26.9248	27.6579	27.3155	27.8555	25.9389	27.3487	26.4002	26.7376	26.6826	27.3431	27.3162	27.5319	24.86	24.5248	24.8313	25.3131	25.842	27.6343	25.4122	26.6971	24.2755	24.9679	23.8211	24.9518	25.8222	26.6955	24.0679	25.6887	NaN	NaN	NaN	NaN	NaN	NaN	NaN	NaN	NaN	NaN
A0A6N4CQV4	Sulfate transporter CysZ	cysZ ASJ32_08325 GO994_16725	OTHER	CytoplasmicMembrane	E	High affinity, high specificity proton-dependent sulfate transporter, which mediates sulfate uptake. Provides the sulfur source for the cysteine synthesis pathway	Chromosome	NaN	NaN	NaN	NaN	NaN	NaN	NaN	NaN	NaN	NaN	NaN	NaN	NaN	NaN	NaN	NaN	23.6754	NaN	23.7885	22.9919	NaN	NaN	NaN	22.3797	23.2857	NaN	24.0173	23.2691	NaN	23.3366	NaN	23.7863	NaN	NaN	NaN	NaN	NaN	NaN	NaN	NaN	NaN	NaN
A0A6N4CQV5	PHP domain-containing protein (S-adenosylmethionine tRNA ribosyltransferase)	ASJ32_20985 GO994_15845	OTHER	Cytoplasmic	S	DNA polymerase alpha chain like domain	Chromosome	22.8554	23.2939	23.9947	22.7789	22.4326	21.7441	22.1229	21.7108	22.6192	22.3621	22.6336	23.3519	22.7358	23.3554	22.0566	22.1724	23.5826	NaN	22.837	23.7406	23.4422	NaN	21.728	22.1791	22.4078	22.7292	23.1471	22.6461	21.8783	NaN	NaN	22.0424	NaN	NaN	NaN	NaN	NaN	NaN	NaN	NaN	NaN	NaN
A0A6N4CQV6	Ligand-gated channel protein	ASJ32_06030	SP(Sec/SPI)	OuterMembrane	M	TonB dependent receptor	Chromosome	NaN	NaN	NaN	NaN	NaN	NaN	NaN	NaN	NaN	NaN	NaN	NaN	NaN	NaN	NaN	NaN	23.2726	22.1958	22.5009	23.1756	24.7686	24.6139	24.4116	24.0267	NaN	23.0367	NaN	23.0856	23.0379	22.691	21.6309	23.3273	23.285	23.4681	23.3324	23.4769	24.6324	24.568	24.3483	24.5519	21.0379	22.3245
A0A6N4CQV7	Heat-shock protein HslJ (META domain-containing protein)	ASJ32_07880 GO994_20760	LIPO(Sec/SPII)	Unknown	O	Heat shock protein	Chromosome	NaN	NaN	NaN	NaN	NaN	NaN	NaN	NaN	NaN	NaN	NaN	NaN	NaN	NaN	NaN	NaN	NaN	NaN	NaN	NaN	NaN	NaN	NaN	NaN	NaN	NaN	NaN	NaN	NaN	NaN	NaN	NaN	NaN	NaN	NaN	NaN	NaN	NaN	NaN	NaN	NaN	NaN
A0A6N4CQV9	Chromosome partition protein MukE (Condesin subunit E)	mukE ASJ32_21335 GO994_12290	OTHER	Cytoplasmic	D	MukE-like family	Chromosome	24.7235	24.502	25.3162	25.4337	24.5663	24.0711	24.1565	24.5695	25.069	24.8615	25.1914	25.1082	24.6738	24.7229	25.6257	25.3774	23.6378	23.7344	23.3896	24.2214	24.1258	24.4774	24.9751	24.856	24.2585	24.7526	22.8893	24.2505	23.9409	23.646	24.7177	24.4625	NaN	NaN	NaN	NaN	NaN	NaN	NaN	NaN	NaN	NaN
A0A6N4CQW1	P-loop NTPase (Pilus assembly protein CpaE)	ASJ32_17890 GO994_07335	OTHER	Cytoplasmic	K	response regulator	Chromosome	NaN	21.7527	22.6631	NaN	NaN	NaN	NaN	NaN	NaN	NaN	NaN	NaN	NaN	NaN	NaN	NaN	NaN	NaN	NaN	NaN	24.586	25.1223	25.0422	NaN	NaN	NaN	NaN	NaN	NaN	NaN	NaN	NaN	NaN	NaN	NaN	NaN	NaN	NaN	NaN	NaN	NaN	NaN
A0A6N4CQW4	Peptidase M23 (Peptidoglycan DD-metalloendopeptidase family protein)	ASJ32_08380 GO994_16785	SP(Sec/SPI)	Cytoplasmic	M	Peptidase family M23	Chromosome	NaN	23.6018	24.6185	NaN	NaN	NaN	NaN	NaN	NaN	NaN	NaN	NaN	NaN	NaN	NaN	NaN	23.9257	NaN	23.589	25.1236	22.9556	23.0847	21.9913	24.3669	NaN	24.1252	23.489	24.2626	23.527	23.9405	25.059	24.3836	NaN	NaN	NaN	NaN	NaN	NaN	NaN	NaN	NaN	NaN
A0A6N4CQW6	Acetyltransferase (GNAT family N-acetyltransferase)	ASJ32_20840 GO994_05455	OTHER	Unknown	K	Acetyltransferase	Chromosome	22.7107	20.0933	NaN	NaN	23.6721	21.2923	NaN	NaN	NaN	19.6932	NaN	NaN	NaN	NaN	NaN	NaN	23.0238	NaN	24.3785	NaN	21.5975	22.746	23.4261	22.6385	23.394	21.6587	23.1974	21.6131	23.3909	NaN	NaN	NaN	NaN	NaN	NaN	NaN	NaN	NaN	NaN	NaN	NaN	NaN
A0A6N4CQW7	Penicillin-binding protein activator LpoB	ASJ32_06085	LIPO(Sec/SPII)	Unknown	M	Peptidoglycan-synthase activator LpoB	Chromosome	NaN	NaN	NaN	NaN	NaN	NaN	NaN	NaN	NaN	NaN	NaN	NaN	NaN	NaN	NaN	NaN	25.3347	23.1308	25.2887	25.4651	26.2337	25.5033	25.8109	25.3986	24.7336	23.9594	24.6309	24.7261	24.2502	25.1789	25.4654	25.4102	NaN	NaN	NaN	NaN	NaN	NaN	NaN	NaN	NaN	NaN
A0A6N4CQW8	Uncharacterized protein	ASJ32_22210	OTHER	Cytoplasmic	S	Domain of unknown function (DUF4276)	Chromosome	24.6657	24.9673	24.8756	24.9584	25.3182	25.2626	25.9304	25.5656	25.194	25.414	24.9564	24.7532	25.49	24.4442	25.0064	24.7069	27.3076	26.2364	27.3203	27.0318	27.2969	27.2213	27.0037	27.0256	27.8661	27.4759	27.2557	27.246	27.0515	26.77	25.6241	26.4427	NaN	NaN	NaN	NaN	17.6191	16.9928	NaN	NaN	NaN	NaN
A0A6N4CQX0	Uncharacterized protein	ASJ32_13970	OTHER	Cytoplasmic	H	PFAM Methyltransferase type 11	Chromosome	NaN	NaN	NaN	NaN	NaN	NaN	NaN	NaN	NaN	NaN	NaN	NaN	NaN	NaN	NaN	NaN	23.0812	NaN	22.8959	23.2499	23.6887	23.0245	22.8105	22.3459	23.0241	23.0395	22.9291	22.5121	22.399	22.8558	22.6172	23.1972	NaN	NaN	NaN	NaN	NaN	NaN	NaN	NaN	NaN	NaN
A0A6N4CQX4	Peptidase M17	ASJ32_22145	OTHER	Cytoplasmic	E	Belongs to the peptidase M17 family	Chromosome	23.2765	23.1681	24.1948	23.6568	23.1865	23.3735	24.0826	24.3433	23.6671	23.6319	24.0971	23.8182	23.8027	23.2859	24.1537	23.7282	22.2014	22.4443	22.0829	NaN	22.9535	23.2977	22.6324	23.678	21.6207	21.8679	22.1581	NaN	23.0429	23.4118	23.5339	22.6446	NaN	NaN	NaN	NaN	NaN	NaN	NaN	NaN	NaN	NaN
A0A6N4CQX5	Uncharacterized protein	ASJ32_17950 GO994_07395	LIPO(Sec/SPII)	Unknown	-	-	Chromosome	NaN	NaN	NaN	NaN	NaN	NaN	NaN	NaN	NaN	NaN	NaN	NaN	NaN	NaN	NaN	NaN	21.0039	21.9863	NaN	22.2991	20.7193	NaN	22.322	22.3523	NaN	NaN	22.0506	NaN	NaN	20.401	22.1368	21.9239	NaN	NaN	NaN	NaN	NaN	NaN	NaN	NaN	NaN	NaN
A0A6N4CQX6	Thiamine-phosphate synthase (TP synthase) (TPS) (EC 2.5.1.3) (Thiamine-phosphate pyrophosphorylase) (TMP pyrophosphorylase) (TMP-PPase)	thiE ASJ32_06135	OTHER	Cytoplasmic	H	Condenses 4-methyl-5-(beta-hydroxyethyl)thiazole monophosphate (THZ-P) and 2-methyl-4-amino-5-hydroxymethyl pyrimidine pyrophosphate (HMP-PP) to form thiamine monophosphate (TMP)	Chromosome	25.8104	25.4458	25.9589	27.1646	25.3526	26.4175	25.6764	25.623	25.7115	25.1494	NaN	27.9933	25.5762	25.4603	26.6362	26.9885	26.9285	28.0851	26.1599	26.8049	26.8772	26.1552	26.6742	26.4946	25.1793	25.5877	24.7074	26.1457	25.7861	25.3944	27.3165	26.7221	NaN	NaN	NaN	NaN	NaN	NaN	NaN	NaN	NaN	NaN
A0A6N4CQX8	Peptidase C69	ASJ32_20890	OTHER	Cytoplasmic	S	Putative modulator of DNA gyrase	Chromosome	23.3083	24.136	NaN	NaN	23.6891	22.981	23.9475	23.3815	23.5057	22.7858	NaN	NaN	23.4326	22.3409	23.1106	23.4107	25.5923	22.3248	25.1433	25.0724	25.598	25.9195	25.8505	24.97	25.4009	25.6914	24.8219	23.3616	26.2844	24.8883	21.5524	25.3747	NaN	NaN	NaN	NaN	NaN	NaN	NaN	NaN	NaN	NaN
A0A6N4CQX9	Acyl-protein synthetase	ASJ32_14020	OTHER	Unknown	H	Acyl-protein synthetase, LuxE	Chromosome	NaN	20.2112	NaN	NaN	NaN	NaN	NaN	NaN	20.0908	NaN	NaN	NaN	NaN	NaN	NaN	NaN	NaN	25.7354	23.8735	24.7108	24.064	23.5255	22.9447	23.938	24.1726	23.7593	24.758	23.8016	22.3597	23.5666	24.6482	24.1506	NaN	NaN	NaN	NaN	NaN	NaN	NaN	NaN	NaN	NaN
A0A6N4CQY7	Hemerythrin	ASJ32_08490 GO994_16935	OTHER	Cytoplasmic	S	Hemerythrin HHE cation binding domain	Chromosome	NaN	NaN	NaN	NaN	NaN	NaN	NaN	NaN	NaN	NaN	NaN	NaN	NaN	NaN	NaN	NaN	NaN	NaN	NaN	NaN	NaN	NaN	NaN	NaN	NaN	NaN	NaN	NaN	NaN	NaN	NaN	NaN	NaN	NaN	NaN	NaN	NaN	NaN	NaN	NaN	NaN	NaN
A0A6N4CQY8	7-carboxy-7-deazaguanine synthase (CDG synthase) (EC 4.3.99.3) (Queuosine biosynthesis protein QueE)	queE ASJ32_21100	OTHER	Cytoplasmic	H	Catalyzes the complex heterocyclic radical-mediated conversion of 6-carboxy-5,6,7,8-tetrahydropterin (CPH4) to 7- carboxy-7-deazaguanine (CDG), a step common to the biosynthetic pathways of all 7-deazapurine-containing compounds	Chromosome	22.4859	22.4992	NaN	NaN	22.6174	21.2904	22.7368	NaN	21.8815	22.6107	21.6252	21.8838	21.8238	21.708	NaN	NaN	24.4094	NaN	23.9227	24.2397	24.6636	24.1804	24.2224	23.8845	24.493	24.7584	23.9242	24.7559	23.9496	23.1816	22.2932	24.4178	NaN	NaN	NaN	NaN	NaN	NaN	NaN	NaN	NaN	NaN
A0A6N4CQY9	Vibriobactin utilization protein ViuB	ASJ32_13330	OTHER	Cytoplasmic	P	Siderophore-interacting protein	Chromosome	22.5189	23.0596	23.3947	21.6808	27.1891	27.3698	27.6726	26.9753	20.5982	20.5763	NaN	21.7371	21.6302	20.3236	NaN	19.8575	21.2842	NaN	22.5773	20.9695	26.7425	26.7163	25.9982	25.5167	NaN	NaN	NaN	NaN	22.4033	20.0313	NaN	NaN	NaN	NaN	NaN	NaN	NaN	NaN	NaN	NaN	NaN	NaN
A0A6N4CQZ1	ArsC family reductase (ArsC family transcriptional regulator)	ASJ32_18005 GO994_07470	OTHER	Unknown	P	Belongs to the ArsC family	Chromosome	22.9126	22.9464	21.6048	22.331	23.4004	22.2781	23.4746	22.3693	21.6805	21.8727	NaN	21.9661	22.3143	20.2862	NaN	23.0063	NaN	NaN	NaN	NaN	NaN	NaN	NaN	NaN	NaN	NaN	NaN	NaN	NaN	NaN	NaN	NaN	NaN	NaN	NaN	NaN	NaN	NaN	NaN	NaN	NaN	NaN
A0A6N4CQZ2	Uncharacterized protein	ASJ32_20735	SP(Sec/SPI)	Unknown	MU	Outer membrane efflux protein	Chromosome	21.1085	21.0634	NaN	NaN	21.3276	NaN	NaN	NaN	20.0806	NaN	22.8951	NaN	NaN	NaN	NaN	NaN	23.8279	24.3264	23.4273	24.4973	23.6673	23.4736	23.7168	23.9511	23.6793	23.949	23.2478	23.8393	22.8676	23.6302	23.9905	24.1841	20.8558	20.89	20.4976	21.0712	20.5299	21.0466	20.0009	21.0776	19.5513	20.7064
A0A6N4CQZ5	Transcriptional regulator	ASJ32_22530	OTHER	Cytoplasmic	K	Repressor	Chromosome	23.8563	23.4275	22.9474	24.168	25.1762	24.741	25.577	25.833	23.6244	23.8544	23.5827	23.453	23.7406	23.2349	23.1896	23.9708	22.6392	22.1108	21.2352	21.5649	22.4212	24.4072	25.0115	24.3569	21.7907	23.4699	21.6864	21.8311	22.6932	21.6844	21.8707	22.4611	NaN	NaN	NaN	NaN	NaN	NaN	NaN	NaN	NaN	NaN
A0A6N4CQZ6	50S ribosomal protein L31 type B	rpmE2 ASJ32_06650	OTHER	Cytoplasmic	J	Ribosomal protein L31	Chromosome	29.4636	28.4567	27.0571	29.5526	28.3109	28.1391	27.7646	28.4307	28.3407	28.8398	25.981	29.4335	29.6875	28.2902	27.7863	28.1321	28.4563	29.0841	28.2777	28.2512	29.6228	28.3335	29.2628	29.37	28.5552	28.964	27.3708	27.9492	28.4624	27.9503	26.9304	27.7571	NaN	NaN	NaN	NaN	19.8719	NaN	20.2896	NaN	19.1623	20.4217
A0A6N4CQZ7	LysR family transcriptional regulator	cysB ASJ32_21155	OTHER	Cytoplasmic	K	Transcriptional regulator	Chromosome	25.1622	25.5864	25.3665	25.2148	24.9432	25.5308	25.2115	25.5729	26.1801	25.1005	25.5705	25.123	25.4976	25.2917	26.7591	24.7864	23.1272	24.7463	24.6533	23.7698	23.9858	23.8611	24.2718	24.5568	24.8545	23.4532	23.5012	23.6876	24.7911	25.3283	24.9748	24.2866	NaN	NaN	NaN	NaN	NaN	NaN	NaN	NaN	NaN	NaN
A0A6N4CR02	Chaperone protein DnaJ	dnaJ ASJ32_13380 GO994_16230	OTHER	Cytoplasmic	O	ATP binding to DnaK triggers the release of the substrate protein, thus completing the reaction cycle. Several rounds of ATP-dependent interactions between DnaJ, DnaK and GrpE are required for fully efficient folding. Also involved, together with DnaK and GrpE, in the DNA replication of plasmids through activation of initiation proteins	Chromosome	25.3974	24.7242	25.5141	26.5284	25.472	25.6165	25.2583	25.778	25.0731	24.4425	26.5088	26.0292	25.4198	24.5908	26.1167	26.1566	28.1922	28.056	27.6179	28.5677	28.2621	28.3277	28.298	28.2536	28.1429	27.7639	27.9119	28.026	27.6942	28.3207	27.5635	28.3234	20.0505	21.375	20.308	20.6829	20.5642	18.9311	19.0615	19.113	20.6672	21.9049
A0A6N4CR07	Heme biosynthesis operon protein HemX	ASJ32_06000 GO994_19230	OTHER	CytoplasmicMembrane	H	HemX, putative uroporphyrinogen-III C-methyltransferase	Chromosome	NaN	NaN	NaN	NaN	NaN	NaN	NaN	NaN	NaN	NaN	NaN	NaN	NaN	NaN	NaN	NaN	27.8812	27.0256	27.6408	28.0468	27.5713	27.3943	26.9853	27.2894	27.2078	27.1668	28.155	28.0004	27.8405	28.2193	28.213	27.9739	NaN	NaN	NaN	NaN	NaN	NaN	NaN	NaN	NaN	NaN
A0A6N4CR08	Acetyltransferase (GNAT family N-acetyltransferase)	ASJ32_06700 GO994_10815	OTHER	Unknown	K	Acetyltransferase (GNAT) domain	Chromosome	NaN	NaN	NaN	NaN	NaN	NaN	NaN	NaN	NaN	NaN	NaN	NaN	NaN	NaN	NaN	NaN	23.3768	NaN	21.725	23.7408	23.6423	23.1345	23.8884	23.2241	22.72	22.3262	22.0912	22.3821	22.0353	NaN	NaN	22.8016	NaN	NaN	NaN	NaN	NaN	NaN	NaN	NaN	NaN	NaN
A0A6N4CR10	N-acetyltransferase	ASJ32_18120 GO994_07600	OTHER	Unknown	S	Acetyltransferase	Chromosome	21.859	21.8368	22.0482	NaN	22.2074	23.0683	23.7527	21.7777	21.2972	21.7888	NaN	NaN	21.9899	NaN	NaN	NaN	NaN	NaN	NaN	NaN	NaN	NaN	NaN	NaN	NaN	NaN	NaN	NaN	NaN	NaN	NaN	NaN	NaN	NaN	NaN	NaN	NaN	NaN	NaN	NaN	NaN	NaN
A0A6N4CR11	DUF1311 domain-containing protein	ASJ32_20630 GO994_03590	LIPO(Sec/SPII)	Unknown	S	protein conserved in bacteria	Chromosome	25.5745	25.5108	26.31	25.5455	26.3257	25.9012	26.916	26.5003	24.3369	25.9628	24.9986	25.4372	24.1297	24.2494	23.9897	25.8469	21.2238	NaN	NaN	22.8894	21.4992	21.6567	21.5811	21.7141	19.9971	NaN	NaN	21.9942	20.7845	21.7637	NaN	21.3602	NaN	NaN	NaN	NaN	NaN	NaN	NaN	NaN	NaN	NaN
A0A6N4CR17	Succinate--CoA ligase [ADP-forming] subunit alpha (EC 6.2.1.5) (Succinyl-CoA synthetase subunit alpha) (SCS-alpha)	sucD ASJ32_06750 GO994_10865	OTHER	Cytoplasmic	C	Succinyl-CoA synthetase functions in the citric acid cycle (TCA), coupling the hydrolysis of succinyl-CoA to the synthesis of either ATP or GTP and thus represents the only step of substrate-level phosphorylation in the TCA. The alpha subunit of the enzyme binds the substrates coenzyme A and phosphate, while succinate binding and nucleotide specificity is provided by the beta subunit	Chromosome	28.3371	28.4028	28.1224	28.5711	27.9238	27.8574	27.9841	28.517	27.6587	27.9265	27.5593	27.9879	28.4222	28.9427	27.6228	28.4656	25.6911	26.6477	26.0234	25.326	26.0822	26.1365	25.5303	27.1492	26.2029	25.7506	26.0177	25.3838	27.1566	27.1854	25.5764	26.3627	17.83	17.6401	16.8554	16.9465	17.6142	17.5575	NaN	17.9466	NaN	18.9065
A0A6N4CR18	DNA topoisomerase 4 subunit A (EC 5.6.2.2) (Topoisomerase IV subunit A)	parC ASJ32_21900 GO994_19505	OTHER	Cytoplasmic	L	Topoisomerase IV is essential for chromosome segregation. It relaxes supercoiled DNA. Performs the decatenation events required during the replication of a circular DNA molecule	Chromosome	26.1436	25.8496	26.8213	26.6869	26.0076	26.3373	25.9476	26.1525	26.7473	25.7478	27.1269	26.7165	25.8501	25.8678	26.886	26.1708	25.6696	26.5466	26.326	25.8073	25.986	26.1857	26.0318	26.4386	26.305	26.6047	26.0136	26.2632	26.4325	26.1664	26.52	25.9411	NaN	26.2479	NaN	21.7147	NaN	NaN	NaN	NaN	21.779	21.3983
A0A6N4CR20	LysR family transcriptional regulator	ASJ32_18170 GO994_07655	OTHER	Cytoplasmic	K	hydrogen peroxide-inducible genes	Chromosome	24.5915	25.2009	24.5745	23.6941	25.0932	24.928	23.9099	22.9543	25.2771	25.0812	26.1012	23.9008	24.7558	24.0163	25.3171	22.8432	23.7658	NaN	24.3233	NaN	24.1053	23.5462	22.6671	22.6067	24.0672	22.5882	22.5371	22.9995	24.2652	24.0918	NaN	22.962	NaN	NaN	NaN	NaN	NaN	NaN	NaN	NaN	NaN	NaN
A0A6N4CR22	Protease (SPFH/Band 7/PHB domain protein)	ASJ32_20680 GO994_03645	OTHER	Unknown	O	prohibitin homologues	Chromosome	NaN	NaN	NaN	NaN	NaN	NaN	21.3857	NaN	NaN	NaN	NaN	NaN	NaN	NaN	NaN	19.5098	28.3768	27.9152	28.141	28.9187	28.6679	28.6027	28.1905	28.4764	27.6938	27.7094	28.0672	28.2468	27.7086	27.7029	28.3738	28.0015	17.2359	18.6892	18.5431	18.0416	21.7434	19.2874	18.7384	18.8104	NaN	18.0421
A0A6N4CR23	Efflux RND transporter periplasmic adaptor subunit (Hemolysin D)	ASJ32_13490 GO994_16120	LIPO(Sec/SPII)	CytoplasmicMembrane	M	Belongs to the membrane fusion protein (MFP) (TC 8.A.1) family	Chromosome	20.8527	NaN	NaN	NaN	NaN	NaN	NaN	NaN	21.5888	NaN	22.4604	21.5281	NaN	NaN	NaN	NaN	26.68	26.0626	26.534	27.3207	26.9351	25.9079	26.7548	26.5122	27.7357	26.6002	27.6046	27.5291	26.3132	25.4796	27.3562	26.8119	NaN	NaN	NaN	NaN	18.7281	NaN	NaN	NaN	NaN	NaN
A0A6N4CR24	Chromosome partition protein MukF (Condesin subunit F)	mukF ASJ32_21330 GO994_12295	OTHER	Cytoplasmic	D	Involved in chromosome condensation, segregation and cell cycle progression. May participate in facilitating chromosome segregation by condensation DNA from both sides of a centrally located replisome during cell division. Not required for mini-F plasmid partitioning. Probably acts via its interaction with MukB and MukE. Overexpression results in anucleate cells. It has a calcium binding activity	Chromosome	22.4919	21.8555	23.2435	23.5572	21.9739	NaN	NaN	NaN	22.1959	23.3038	23.3736	NaN	21.869	25.0235	22.512	NaN	24.7553	23.5584	24.9699	24.0437	24.8832	24.0166	24.418	23.8097	25.2754	24.263	25.1029	24.6783	24.9686	25.1131	24.2292	24.7205	NaN	NaN	NaN	NaN	NaN	NaN	NaN	NaN	NaN	NaN
A0A6N4CR26	Diguanylate phosphodiesterase (RNase E specificity factor CsrD)	csrD ASJ32_06350 GO994_02915	OTHER	CytoplasmicMembrane	T	Gammaproteobacterial periplasmic sensor domain	Chromosome	22.3648	22.9416	NaN	NaN	NaN	NaN	NaN	NaN	NaN	NaN	NaN	NaN	NaN	NaN	NaN	NaN	24.6912	NaN	24.1293	24.9276	24.9304	24.9732	24.3036	24.3457	24.5563	24.7495	25.9387	25.0294	23.7524	24.3244	24.7396	24.0864	NaN	NaN	NaN	NaN	NaN	NaN	NaN	NaN	NaN	NaN
A0A6N4CR27	Pyruvate kinase (EC 2.7.1.40) (Fragment)	ASJ32_06640	OTHER	Cytoplasmic	G	Pyruvate kinase	Chromosome	28.4933	28.9254	28.7232	27.7459	28.1432	28.2964	27.8093	28.0042	29.2206	28.6075	29.2963	28.7255	28.535	29.4871	28.5596	27.5025	23.0423	NaN	23.4107	22.6092	22.853	22.5169	23.1173	21.3077	24.6778	23.2736	24.2794	22.0517	23.8822	23.9208	NaN	21.9499	NaN	NaN	NaN	NaN	NaN	NaN	NaN	NaN	NaN	NaN
A0A6N4CR32	Ubiquinol oxidase subunit 2	ASJ32_13550	LIPO(Sec/SPII)	CytoplasmicMembrane	C	subunit 2	Chromosome	NaN	NaN	NaN	NaN	NaN	NaN	NaN	NaN	NaN	NaN	NaN	NaN	NaN	NaN	NaN	NaN	26.7273	23.4788	26.9684	26.5069	26.8536	25.8346	25.839	25.5166	26.998	26.7862	27.398	25.6305	26.7064	26.5695	25.824	26.5639	NaN	19.3073	18.5943	18.9125	20.1482	NaN	NaN	NaN	NaN	18.4103
A0A6N4CR36	30S ribosomal protein S7	rpsG ASJ32_07275 GO994_01720	OTHER	Cytoplasmic	J	One of the primary rRNA binding proteins, it binds directly to 16S rRNA where it nucleates assembly of the head domain of the 30S subunit. Is located at the subunit interface close to the decoding center, probably blocks exit of the E-site tRNA	Chromosome	31.4916	31.7684	32.561	32.3901	30.1739	30.6941	30.7737	31.4737	31.9479	31.9079	32.6138	32.4256	31.5609	32.3113	32.6002	32.0299	30.2051	29.9677	31.1143	30.6767	30.6746	30.8698	30.4952	31.1762	31.1235	30.6947	30.2716	30.4768	29.506	30.2776	28.3283	29.7314	21.7282	18.714	19.8551	20.0226	20.7723	NaN	22.3136	NaN	20.7248	22.3843
A0A6N4CR38	Cell division protein FtsX	ftsX ASJ32_06400 GO994_02965	OTHER	CytoplasmicMembrane	D	Part of the ABC transporter FtsEX involved in cellular division	Chromosome	NaN	NaN	NaN	NaN	NaN	NaN	NaN	NaN	NaN	NaN	NaN	NaN	NaN	NaN	NaN	NaN	24.8885	NaN	25.1866	24.7586	24.7656	23.9085	23.6341	23.7377	25.4934	24.7035	24.9434	24.4475	24.7096	24.6259	24.5581	24.9604	NaN	NaN	NaN	NaN	NaN	NaN	NaN	NaN	NaN	NaN
A0A6N4CR39	tRNA 5-methylaminomethyl-2-thiouridine biosynthesis bifunctional protein MnmC (tRNA mnm(5)s(2)U biosynthesis bifunctional protein) [Includes: tRNA (mnm(5)s(2)U34)-methyltransferase (EC 2.1.1.61); FAD-dependent cmnm(5)s(2)U34 oxidoreductase (EC 1.5.-.-)]	mnmC trmC yfcK ASJ32_06690	OTHER	Cytoplasmic	J	Catalyzes the last two steps in the biosynthesis of 5- methylaminomethyl-2-thiouridine (mnm(5)s(2)U) at the wobble position (U34) in tRNA. Catalyzes the FAD-dependent demodification of cmnm(5)s(2)U34 to nm(5)s(2)U34, followed by the transfer of a methyl group from S-adenosyl-L-methionine to nm(5)s(2)U34, to form mnm(5)s(2)U34	Chromosome	21.4428	20.0072	21.0796	23.2059	20.663	21.1193	20.2229	21.4492	19.3431	21.2236	22.3712	21.4932	22.0401	20.9272	22.2649	23.4381	25.308	25.6866	24.7095	25.6529	25.0792	24.9297	25.4642	25.0167	25.1254	25.2177	25.0979	25.7452	25.3735	24.8989	25.8489	25.666	19.1796	18.0355	18.2616	19.0111	17.1266	17.3223	17.989	18.3003	19.2939	18.9166
A0A6N4CR42	Alkene reductase	ASJ32_20000 GO994_13335	OTHER	Cytoplasmic	C	COG1902 NADH flavin oxidoreductases, Old Yellow Enzyme family	Chromosome	NaN	NaN	NaN	NaN	NaN	19.8148	NaN	21.1183	NaN	NaN	NaN	NaN	NaN	NaN	NaN	NaN	NaN	NaN	NaN	NaN	NaN	NaN	NaN	NaN	NaN	NaN	NaN	NaN	NaN	NaN	NaN	NaN	NaN	NaN	NaN	NaN	NaN	NaN	NaN	NaN	NaN	NaN
A0A6N4CR45	Cytochrome c-552 (EC 1.7.2.2) (Ammonia-forming cytochrome c nitrite reductase) (Cytochrome c nitrite reductase)	nrfA ASJ32_06910 GO994_12100	SP(Sec/SPI)	Periplasmic	C	Catalyzes the reduction of nitrite to ammonia, consuming six electrons in the process	Chromosome	NaN	NaN	NaN	NaN	NaN	NaN	NaN	NaN	NaN	NaN	NaN	NaN	NaN	NaN	NaN	NaN	NaN	NaN	NaN	NaN	28.3184	27.8734	28.216	NaN	NaN	NaN	NaN	NaN	NaN	NaN	NaN	NaN	NaN	NaN	NaN	NaN	NaN	NaN	NaN	NaN	NaN	NaN
A0A6N4CR46	50S ribosomal protein L10	rplJ ASJ32_07325 GO994_01670	OTHER	Cytoplasmic	J	Forms part of the ribosomal stalk, playing a central role in the interaction of the ribosome with GTP-bound translation factors	Chromosome	31.0227	31.0892	31.7174	31.8427	30.2163	30.18	30.342	30.8997	31.5854	31.0562	32.0095	31.9171	31.1389	30.9532	32.3158	31.0286	29.0262	29.3327	28.8806	29.6841	28.6401	29.2033	29.0948	29.7102	29.2213	29.657	29.1197	29.5559	28.8062	28.8534	28.6779	29.0254	NaN	19.9067	NaN	19.2306	20.3178	19.5545	19.19	18.5612	20.0126	19.2474
A0A6N4CR49	Elongation factor 4 (EF-4) (EC 3.6.5.n1) (Ribosomal back-translocase LepA)	lepA ASJ32_17675	OTHER	CytoplasmicMembrane	M	Required for accurate and efficient protein synthesis under certain stress conditions. May act as a fidelity factor of the translation reaction, by catalyzing a one-codon backward translocation of tRNAs on improperly translocated ribosomes. Back- translocation proceeds from a post-translocation (POST) complex to a pre-translocation (PRE) complex, thus giving elongation factor G a second chance to…	Chromosome	21.9825	21.137	22.2451	22.9713	22.1346	NaN	20.8403	NaN	21.9437	20.8462	22.7839	22.4933	21.9137	21.9713	22.2264	22.0692	27.6114	26.0592	27.0282	27.2783	27.6221	26.6051	27.4532	26.3333	27.7479	26.9915	27.7985	27.4842	27.3588	27.3277	27.6267	27.5845	21.2958	20.8	20.5981	20.9753	20.07	19.6054	20.2951	20.0083	20.1843	21.2987
A0A6N4CR50	Porin	ASJ32_13385	SP(Sec/SPI)	OuterMembrane	M	Maltoporin (phage lambda and maltose receptor)	Chromosome	NaN	NaN	NaN	NaN	NaN	NaN	NaN	NaN	NaN	NaN	NaN	NaN	NaN	NaN	NaN	NaN	NaN	NaN	NaN	NaN	NaN	NaN	NaN	NaN	NaN	NaN	NaN	NaN	NaN	NaN	NaN	NaN	18.9527	19.0482	19.285	18.0622	19.0904	19.1405	20.083	19.5826	18.4923	18.0354
A0A6N4CR51	Dihydrolipoyllysine-residue succinyltransferase component of 2-oxoglutarate dehydrogenase complex (EC 2.3.1.61) (2-oxoglutarate dehydrogenase complex component E2)	odhB ASJ32_06740 GO994_10855	OTHER	Cytoplasmic	C	The 2-oxoglutarate dehydrogenase complex catalyzes the overall conversion of 2-oxoglutarate to succinyl-CoA and CO(2)	Chromosome	27.5813	27.8464	27.4559	27.3712	27.3396	27.3614	26.8356	27.0284	27.9368	27.4903	28.4134	27.3014	28.1142	28.412	28.721	27.4483	27.2728	26.5516	27.9675	26.6409	26.8096	26.7752	26.1676	26.5022	27.6297	26.5878	27.7372	26.3805	27.6095	28.3343	27.1927	26.4874	NaN	NaN	NaN	NaN	NaN	NaN	NaN	NaN	NaN	NaN
A0A6N4CR54	Chemotaxis protein	ASJ32_20055	OTHER	CytoplasmicMembrane	NT	chemotaxis protein	Chromosome	NaN	NaN	NaN	NaN	NaN	NaN	NaN	NaN	NaN	NaN	NaN	NaN	NaN	NaN	NaN	NaN	22.2191	22.6025	22.1708	22.9312	21.8439	22.1866	22.0089	21.9814	22.3547	22.7034	22.3786	22.2091	22.5137	21.9879	24.2408	22.6398	NaN	NaN	NaN	NaN	NaN	NaN	NaN	NaN	NaN	NaN
A0A6N4CR58	Ribosomal RNA large subunit methyltransferase K/L [Includes: 23S rRNA m2G2445 methyltransferase (EC 2.1.1.173) (rRNA (guanine-N(2)-)-methyltransferase RlmL); 23S rRNA m7G2069 methyltransferase (EC 2.1.1.264) (rRNA (guanine-N(7)-)-methyltransferase RlmK)]	rlmL ASJ32_12975	OTHER	Cytoplasmic	J	Specifically methylates the guanine in position 2445 (m2G2445) and the guanine in position 2069 (m7G2069) of 23S rRNA	Chromosome	26.5206	26.3246	26.8788	26.373	25.6077	25.8701	25.7287	25.6166	27.2236	26.3324	27.6186	26.4849	26.2381	26.1915	26.5982	25.6446	27.4749	26.1113	27.1138	26.3685	27.2714	26.8634	26.4937	26.2926	27.7992	27.3913	27.5213	26.9901	27.4532	27.3191	26.4828	26.0814	17.6878	18.1564	17.4062	17.2135	18.1407	NaN	NaN	NaN	18.0417	18.3176
A0A6N4CR59	(P)ppGpp synthetase (EC 2.7.6.5)	relA ASJ32_17725	OTHER	Cytoplasmic	KT	In eubacteria ppGpp (guanosine 3'-diphosphate 5-' diphosphate) is a mediator of the stringent response that coordinates a variety of cellular activities in response to changes in nutritional abundance	Chromosome	21.3121	21.3555	21.3188	23.2863	21.991	NaN	21.4196	21.7248	NaN	NaN	NaN	20.7764	22.1733	22.3713	NaN	22.9898	26.3087	25.1518	26.4795	26.3201	26.8179	25.8587	26.2888	26.1834	26.4645	25.9106	25.7895	25.3537	26.6409	26.3768	25.9969	26.4391	NaN	NaN	NaN	NaN	NaN	NaN	NaN	NaN	NaN	NaN
A0A6N4CR60	Protease 2 (EC 3.4.21.83)	ASJ32_06515	SP(Sec/SPI)	Periplasmic	E	Protease II	Chromosome	26.51	26.8831	26.8649	25.9142	27.6023	27.0584	27.3835	27.4223	26.1466	26.0666	25.4976	25.8931	26.3174	26.4161	24.5917	25.5529	25.1875	NaN	24.0359	25.7256	24.2405	24.3857	24.4936	25.4001	NaN	24.2142	24.9755	24.4281	24.3131	27.385	24.6666	24.7613	NaN	NaN	NaN	NaN	NaN	NaN	NaN	NaN	NaN	NaN
A0A6N4CR62	3-beta hydroxysteroid dehydrogenase	ASJ32_06795	SP(Sec/SPI)	Unknown	S	NAD(P)H-binding	Chromosome	NaN	NaN	NaN	NaN	20.7204	20.8841	22.1575	NaN	NaN	NaN	NaN	NaN	NaN	NaN	NaN	NaN	NaN	NaN	NaN	NaN	NaN	NaN	NaN	NaN	NaN	NaN	NaN	NaN	NaN	NaN	NaN	NaN	NaN	NaN	NaN	NaN	NaN	NaN	NaN	NaN	NaN	NaN
A0A6N4CR63	UPF0229 protein ASJ32_07020	ASJ32_07020	OTHER	Cytoplasmic	S	Belongs to the UPF0229 family	Chromosome	NaN	NaN	NaN	NaN	NaN	NaN	NaN	NaN	NaN	NaN	NaN	NaN	NaN	NaN	NaN	NaN	20.1162	NaN	20.9549	NaN	23.9556	22.8723	23.4721	23.6359	20.6522	NaN	NaN	NaN	20.6318	20.9018	NaN	21.0515	NaN	NaN	NaN	NaN	NaN	NaN	NaN	NaN	NaN	NaN
A0A6N4CR68	MSHA biogenesis protein MshL	ASJ32_06320	LIPO(Sec/SPII)	OuterMembrane	NU	Secretin N-terminal domain	Chromosome	21.1924	20.6875	22.1875	21.5845	21.1768	21.2744	NaN	NaN	20.5018	NaN	21.7915	NaN	21.1471	22.0023	21.5829	21.6165	25.2586	24.5301	25.2209	26.3162	25.3054	25.7028	25.8098	25.6619	25.1494	25.7437	25.3228	25.8678	25.1356	25.231	25.4506	25.8513	NaN	NaN	NaN	NaN	17.7016	17.6153	NaN	NaN	NaN	NaN
A0A6N4CR71	Peptidoglycan-binding protein	ASJ32_17780	LIPO(Sec/SPII)	OuterMembrane	M	Lysin motif	Chromosome	23.8461	25.3477	27.2128	25.5159	NaN	NaN	NaN	NaN	26.8188	24.6061	28.2436	25.625	23.9822	NaN	23.5008	25.2577	26.4367	26.0218	26.1061	27.4881	26.4819	26.0678	26.1328	26.8246	26.2332	26.1849	26.9048	26.6676	26.2934	26.6185	26.472	26.874	NaN	19.8004	NaN	NaN	19.315	17.3059	19.0515	NaN	19.1543	17.8414
A0A6N4CR73	Aspartate--ammonia ligase (EC 6.3.1.1) (Asparagine synthetase A)	asnA ASJ32_07490 GO994_01490	OTHER	Cytoplasmic	E	Aspartate-ammonia ligase	Chromosome	NaN	NaN	NaN	NaN	NaN	NaN	NaN	NaN	NaN	NaN	NaN	NaN	NaN	NaN	NaN	NaN	24.0959	23.0496	23.1565	23.6965	23.432	22.82	23.6695	23.2693	22.7593	22.6709	24.0597	23.9246	23.002	22.4532	23.3026	23.5935	NaN	NaN	NaN	NaN	NaN	NaN	NaN	NaN	NaN	NaN
A0A6N4CR75	Uncharacterized protein	ASJ32_19895 GO994_15725	OTHER	Cytoplasmic	NU	PFAM Fimbrial assembly family protein	Chromosome	NaN	NaN	NaN	NaN	NaN	NaN	NaN	NaN	NaN	NaN	NaN	NaN	NaN	NaN	NaN	NaN	24.9966	22.2096	25.3137	24.8692	25.0121	24.165	23.748	23.8986	26.0431	24.7048	26.3329	25.3902	25.1814	25.1225	24.9711	24.2179	NaN	NaN	NaN	NaN	NaN	NaN	NaN	NaN	NaN	NaN
A0A6N4CR78	Uncharacterized protein	ASJ32_06045 GO994_19180	SP(Sec/SPI)	Periplasmic	S	protein conserved in bacteria	Chromosome	26.8955	27.2915	26.1288	26.6724	27.2462	26.717	27.5572	27.2203	26.3084	26.1593	26.2818	26.9039	26.2685	25.8806	25.8253	26.5386	22.8939	NaN	22.9094	22.7999	23.4848	22.4138	21.2378	22.2834	22.0762	22.7634	23.2416	21.4635	23.0057	NaN	NaN	22.4396	NaN	NaN	NaN	NaN	NaN	NaN	NaN	NaN	NaN	NaN
A0A6N4CR79	Urocanate hydratase (Urocanase) (EC 4.2.1.49) (Imidazolonepropionate hydrolase)	hutU ASJ32_06370	OTHER	Cytoplasmic	H	Catalyzes the conversion of urocanate to 4-imidazolone- 5-propionate	Chromosome	28.096	28.1787	28.2726	28.2688	26.4967	26.9148	27.2248	27.0307	27.4213	28.0915	27.0563	27.9243	27.8753	27.689	26.8538	28.1831	25.6127	26.5682	26.2678	25.8053	24.0621	23.6232	23.6309	24.9645	25.3462	25.7685	24.8135	25.4716	26.6652	26.6033	25.4334	25.6619	19.6211	19.0666	19.8154	18.9248	NaN	NaN	NaN	NaN	NaN	19.6235
A0A6N4CR81	NAD(P) transhydrogenase subunit alpha (EC 7.1.1.1)	pntA ASJ32_07545	OTHER	CytoplasmicMembrane	C	The transhydrogenation between NADH and NADP is coupled to respiration and ATP hydrolysis and functions as a proton pump across the membrane	Chromosome	23.0936	21.9612	24.2487	24.483	23.6951	23.0832	23.0975	23.4833	21.9953	22.684	24.6918	23.2838	22.7989	22.7195	24.6532	24.166	29.9481	29.6173	29.6311	30.2094	30.0832	30.2009	29.9549	29.3574	29.5612	29.1235	30.2902	30.2057	30.163	30.4451	31.0271	30.179	19.4013	20.3812	21.0733	20.2784	21.2473	19.9931	20.9418	20.4115	21.1455	19.6116
A0A6N4CR83	Uncharacterized protein	ASJ32_04220	SP(Sec/SPI)	Unknown	S	Protein of unknown function (DUF1090)	Chromosome	25.4466	25.5072	26.3642	25.5217	26.1588	24.7553	26.3906	25.7891	24.5333	24.5801	25.3539	24.4694	24.1084	25.4182	25.9944	25.314	NaN	NaN	NaN	NaN	NaN	20.7886	20.7537	NaN	NaN	NaN	NaN	NaN	NaN	NaN	NaN	NaN	NaN	NaN	NaN	NaN	NaN	NaN	NaN	NaN	NaN	NaN
A0A6N4CR84	Poly(3-hydroxyalkanoate) synthetase	ASJ32_07125	OTHER	Cytoplasmic	I	Poly-beta-hydroxybutyrate polymerase (PhaC) N-terminus	Chromosome	NaN	NaN	NaN	NaN	NaN	NaN	NaN	NaN	NaN	NaN	NaN	NaN	NaN	NaN	NaN	NaN	24.99	25.0513	24.0017	25.8282	24.8262	24.5903	24.8506	24.8672	22.3805	22.2423	22.0609	23.053	24.2038	23.7303	25.1919	25.0614	NaN	NaN	NaN	NaN	15.1728	NaN	NaN	17.3101	NaN	NaN
A0A6N4CR88	Glycosyl transferase	ASJ32_19950 GO994_15625	OTHER	CytoplasmicMembrane	M	Glycosyl transferase family 4	Chromosome	NaN	NaN	NaN	NaN	NaN	NaN	NaN	NaN	NaN	NaN	NaN	NaN	NaN	NaN	NaN	NaN	NaN	NaN	NaN	NaN	NaN	NaN	NaN	NaN	21.777	NaN	23.5371	24.9158	23.0161	NaN	NaN	NaN	NaN	NaN	NaN	NaN	NaN	NaN	NaN	NaN	NaN	NaN
A0A6N4CR91	Probable transcriptional regulatory protein ASJ32_21040	ASJ32_21040 GO994_14275	OTHER	Unknown	K	Transcriptional regulatory protein	Chromosome	27.2598	27.5227	27.4207	27.3596	27.7363	28.4205	28.5254	28.2904	27.1142	28.4694	27.5405	27.7945	27.4284	26.0383	25.9917	27.8006	22.9095	23.2491	NaN	24.0427	NaN	NaN	NaN	NaN	NaN	23.4046	NaN	22.945	NaN	NaN	NaN	NaN	NaN	NaN	NaN	NaN	NaN	NaN	NaN	NaN	NaN	NaN
A0A6N4CR94	Protein-export membrane protein SecG	secG ASJ32_04285 GO994_05245	OTHER	CytoplasmicMembrane	U	Preprotein translocase	Chromosome	NaN	NaN	NaN	NaN	NaN	NaN	NaN	NaN	NaN	NaN	NaN	NaN	NaN	NaN	NaN	NaN	25.9716	24.9581	28.2654	26.9711	26.2848	24.2903	24.775	25.1249	27.4827	23.9959	27.4124	26.598	27.1207	26.945	24.4727	25.8203	NaN	NaN	NaN	NaN	18.9284	NaN	NaN	NaN	NaN	NaN
A0A6N4CR95	Threonine--tRNA ligase (EC 6.1.1.3) (Threonyl-tRNA synthetase) (ThrRS)	thrS ASJ32_13185 GO994_10510	OTHER	Cytoplasmic	J	Catalyzes the attachment of threonine to tRNA(Thr) in a two-step reaction L-threonine is first activated by ATP to form Thr-AMP and then transferred to the acceptor end of tRNA(Thr)	Chromosome	27.0395	27.1834	26.6971	27.4235	26.2595	26.4446	26.5582	26.761	27.7033	27.1107	27.7466	27.3011	27.339	27.5356	27.3724	26.8484	28.8451	27.8148	28.9932	28.5237	28.5675	28.3754	28.527	28.0136	29.5746	29.0044	29.2376	28.8176	28.8983	28.4893	28.0354	28.5314	23.8924	23.2999	23.3416	23.2171	21.7919	22.5108	22.2212	22.8442	22.902	24.3665
A0A6N4CRA0	Fatty acid metabolism regulator protein	fadR ASJ32_07010 GO994_12000	OTHER	Cytoplasmic	K	Multifunctional regulator of fatty acid metabolism	Chromosome	23.8574	23.5193	23.3412	24.1918	24.6149	23.5687	24.1522	23.9693	23.4835	23.3978	23.4563	24.135	23.2821	23.967	23.4862	24.2886	27.1263	25.1892	26.864	27.0881	27.3736	26.5038	27.0034	26.9139	26.2739	26.5067	27.1225	26.207	26.3632	25.935	26.304	26.5654	17.8182	19.8569	19.9323	19.7962	20.2278	19.1201	19.6798	19.3748	19.8332	20.5429
A0A6N4CRA3	Efflux pump membrane transporter	ASJ32_20935	OTHER	CytoplasmicMembrane	V	Efflux pump membrane transporter	Chromosome	NaN	NaN	NaN	NaN	NaN	NaN	NaN	NaN	NaN	NaN	NaN	NaN	NaN	NaN	NaN	NaN	22.138	23.5727	21.5515	23.2162	24.6193	24.096	24.1208	24.1694	21.8262	22.4981	21.6308	22.4827	23.5248	22.2354	NaN	22.8359	NaN	NaN	NaN	NaN	NaN	NaN	NaN	NaN	NaN	NaN
A0A6N4CRA4	Flagellar motor protein PomA	ASJ32_04345	OTHER	CytoplasmicMembrane	N	MotA/TolQ/ExbB proton channel family	Chromosome	NaN	NaN	NaN	NaN	NaN	NaN	NaN	NaN	NaN	NaN	NaN	NaN	NaN	NaN	NaN	NaN	24.915	25.129	25.2631	25.0887	25.1669	24.7034	23.8536	24.5884	25.0801	24.497	25.8696	25.5862	25.581	25.4328	24.8617	25.4759	NaN	NaN	NaN	NaN	NaN	NaN	NaN	NaN	NaN	NaN
A0A6N4CRA8	Potassium transporter	ASJ32_06535	OTHER	CytoplasmicMembrane	P	Belongs to the monovalent cation proton antiporter 2 (CPA2) transporter (TC 2.A.37) family	Chromosome	NaN	NaN	NaN	NaN	NaN	NaN	NaN	NaN	NaN	NaN	NaN	NaN	NaN	NaN	NaN	NaN	22.2736	NaN	23.8871	21.3132	22.1378	22.1737	21.5811	20.9894	23.0171	NaN	23.5968	21.1971	23.0126	22.7658	22.4232	22.2393	NaN	NaN	NaN	NaN	NaN	NaN	NaN	NaN	NaN	NaN
A0A6N4CRA9	HD family phosphohydrolase	ASJ32_05255	OTHER	Cytoplasmic	T	Domain of unknown function (DUF3391)	Chromosome	22.4092	21.7969	21.9683	22.927	23.5256	22.493	21.9469	21.8694	22.0458	22.538	NaN	23.6	22.9355	21.9766	NaN	22.1388	25.2498	24.3805	24.2136	24.5022	25.5044	25.1157	25.7051	25.3589	23.856	25.1718	23.3936	24.7668	24.515	23.5471	24.4566	25.0205	NaN	NaN	NaN	NaN	NaN	NaN	NaN	NaN	NaN	NaN
A0A6N4CRB0	ATP-dependent helicase (Helicase)	ASJ32_21785 GO994_15070	OTHER	CytoplasmicMembrane	L	SNF2 family N-terminal domain	Chromosome	20.4368	NaN	20.3363	21.0697	20.4577	NaN	NaN	NaN	19.8843	NaN	21.0645	NaN	19.6403	NaN	NaN	NaN	25.5774	24.0957	25.1835	25.5566	25.2292	24.425	24.9606	24.619	25.1374	25.1587	25.4068	25.4309	24.6956	24.524	25.498	25.4282	18.2872	18.6487	19.2402	18.714	17.8855	17.9625	18.8997	19.4547	18.9698	19.9032
A0A6N4CRB1	Transcription antitermination protein NusB (Antitermination factor NusB)	nusB ASJ32_04395 GO994_05140	OTHER	Cytoplasmic	K	Involved in transcription antitermination. Required for transcription of ribosomal RNA (rRNA) genes. Binds specifically to the boxA antiterminator sequence of the ribosomal RNA (rrn) operons	Chromosome	26.0771	25.8461	25.7184	25.3597	25.6959	24.7913	25.4074	24.8744	26.7544	25.893	26.0474	25.5958	26.2551	25.5402	25.7317	25.4011	25.305	24.5131	25.7705	24.2213	25.5447	24.9653	24.7434	24.9318	26.1318	25.0799	25.4864	24.9124	25.6146	26.1563	NaN	24.1874	NaN	NaN	NaN	NaN	NaN	NaN	NaN	NaN	NaN	NaN
A0A6N4CRB3	ATP-dependent protease ATPase subunit HslU (Unfoldase HslU)	hslU ASJ32_07720 GO994_20915	OTHER	Cytoplasmic	O	this subunit has chaperone activity. The binding of ATP and its subsequent hydrolysis by HslU are essential for unfolding of protein substrates subsequently hydrolyzed by HslV. HslU recognizes the N-terminal part of its protein substrates and unfolds these before they are guided to HslV for hydrolysis	Chromosome	28.5083	28.1556	27.822	28.7032	28.6285	28.8981	29.1216	28.757	28.1383	28.0969	28.4042	28.506	28.4961	28.6128	28.7232	28.597	28.3379	28.9751	28.4273	28.1728	29.1041	29.1593	29.0568	29.2121	28.0604	28.2419	27.7486	27.9131	27.8108	27.5318	28.2582	28.447	20.3337	20.8053	20.9267	19.8319	20.7923	20.8178	20.107	20.4103	19.5974	20.4807
A0A6N4CRB4	Uncharacterized protein	ASJ32_06265	OTHER	OuterMembrane	S	Protein of unknown function	Chromosome	NaN	NaN	NaN	NaN	NaN	NaN	NaN	NaN	NaN	NaN	NaN	NaN	NaN	NaN	NaN	NaN	24.0576	24.8141	23.8903	24.5748	23.6197	23.3195	22.1043	22.4789	23.8333	23.7227	24.3177	24.2367	22.6637	23.3092	24.5729	23.6707	NaN	NaN	NaN	NaN	NaN	NaN	NaN	NaN	NaN	NaN
A0A6N4CRB5	Chorismate synthase (CS) (EC 4.2.3.5) (5-enolpyruvylshikimate-3-phosphate phospholyase)	aroC ASJ32_13285 GO994_11400	OTHER	Cytoplasmic	E	Catalyzes the anti-1,4-elimination of the C-3 phosphate and the C-6 proR hydrogen from 5-enolpyruvylshikimate-3-phosphate (EPSP) to yield chorismate, which is the branch point compound that serves as the starting substrate for the three terminal pathways of aromatic amino acid biosynthesis. This reaction introduces a second double bond into the aromatic ring system	Chromosome	27.4309	27.2401	28.4273	27.695	27.8475	28.071	27.5385	28.1803	27.1012	27.1441	27.2353	26.9821	27.2677	27.5452	27.6977	27.5951	24.9482	25.4841	24.2516	24.2191	24.6691	25.0727	24.5641	24.3736	23.5687	24.0014	23.7522	24.0063	24.0605	24.7727	23.9125	23.8942	NaN	NaN	NaN	NaN	NaN	NaN	NaN	NaN	NaN	NaN
A0A6N4CRB6	Anthranilate synthase component 1 (EC 4.1.3.27)	ASJ32_20990 GO994_15855	OTHER	Cytoplasmic	E	Anthranilate synthase component I, N terminal region	Chromosome	24.2087	24.5676	24.1401	24.0523	24.6095	24.8599	24.8721	24.8234	23.8477	22.6572	23.095	23.539	23.7042	23.5349	22.8132	23.9169	24.6864	24.4717	24.3373	24.6605	25.1067	25.7603	25.8953	25.4973	24.1327	24.9668	22.7827	24.4913	23.4287	23.8992	23.056	24.6421	NaN	NaN	NaN	NaN	NaN	NaN	NaN	NaN	NaN	NaN
A0A6N4CRB9	Acetyltransferase (GNAT family N-acetyltransferase)	ASJ32_05305 GO994_19390	OTHER	Cytoplasmic	K	Acetyltransferase (GNAT) domain	Chromosome	NaN	NaN	NaN	NaN	NaN	NaN	NaN	NaN	NaN	NaN	NaN	NaN	NaN	NaN	NaN	NaN	23.5177	NaN	NaN	NaN	24.3905	23.9939	23.877	NaN	22.4148	23.0002	22.2899	NaN	23.0513	NaN	NaN	23.3291	NaN	NaN	NaN	NaN	NaN	NaN	NaN	NaN	NaN	NaN
A0A6N4CRC1	Ribosome-associated protein (Ribosome-associated protein YbcJ)	ybcJ ASJ32_07115 GO994_11070	OTHER	Unknown	S	S4 domain	Chromosome	25.5447	25.2645	25.7163	25.1283	24.8807	24.0508	24.9964	24.2466	24.9704	24.0765	23.8281	25.151	24.7296	24.1479	25.4028	25.0365	NaN	NaN	NaN	NaN	NaN	NaN	NaN	NaN	NaN	NaN	NaN	NaN	NaN	NaN	NaN	NaN	NaN	NaN	NaN	NaN	NaN	NaN	NaN	NaN	NaN	NaN
A0A6N4CRC6	UMP phosphatase	ASJ32_19990	OTHER	Cytoplasmic	G	Haloacid dehalogenase-like hydrolase	Chromosome	24.1459	24.493	25.4524	24.6941	24.3983	25.5808	24.8399	25.1795	25.2472	24.3019	25.9992	25.9147	25.0768	23.8668	26.0173	24.8681	23.4957	NaN	23.4936	23.8903	23.5644	23.7561	24.1561	24.6743	23.6126	23.8169	23.075	24.3578	23.6152	24.0117	24.5114	23.8457	NaN	NaN	NaN	NaN	NaN	NaN	NaN	NaN	NaN	NaN
A0A6N4CRC7	Alpha/beta fold hydrolase	ASJ32_20845 GO994_05450	OTHER	CytoplasmicMembrane	S	esterase of the alpha beta hydrolase fold	Chromosome	NaN	NaN	NaN	NaN	NaN	NaN	NaN	NaN	NaN	NaN	NaN	NaN	NaN	NaN	NaN	NaN	21.7593	NaN	21.6189	NaN	22.4362	21.5429	22.4355	NaN	21.4446	NaN	21.3189	NaN	NaN	NaN	NaN	NaN	NaN	NaN	NaN	NaN	NaN	NaN	NaN	NaN	NaN	NaN
A0A6N4CRC9	Biotin carboxyl carrier protein of acetyl-CoA carboxylase	ASJ32_04495	OTHER	Cytoplasmic	I	first, biotin carboxylase catalyzes the carboxylation of the carrier protein and then the transcarboxylase transfers the carboxyl group to form malonyl-CoA	Chromosome	28.1323	27.5373	28.1063	28.7494	27.5815	30.0192	27.8112	28.1763	26.9552	28.75	27.9036	28.7438	27.2954	27.4681	28.8716	28.6001	23.4887	25.4242	24.2142	24.5389	23.3981	24.0225	23.234	23.3425	23.051	NaN	23.7396	NaN	24.26	23.933	25.7048	23.5614	NaN	NaN	NaN	NaN	NaN	NaN	NaN	NaN	NaN	NaN
A0A6N4CRD0	NUDIX domain-containing protein (NUDIX hydrolase)	ASJ32_07165 GO994_11120	OTHER	Unknown	L	NUDIX domain	Chromosome	22.0342	NaN	NaN	NaN	NaN	20.4256	23.3888	NaN	NaN	NaN	NaN	NaN	NaN	NaN	NaN	NaN	NaN	NaN	NaN	NaN	NaN	NaN	NaN	NaN	NaN	NaN	NaN	NaN	NaN	NaN	NaN	NaN	NaN	NaN	NaN	NaN	NaN	NaN	NaN	NaN	NaN	NaN
A0A6N4CRD1	Histidinol dehydrogenase (HDH) (EC 1.1.1.23)	hisD ASJ32_12575	OTHER	Cytoplasmic	E	Catalyzes the sequential NAD-dependent oxidations of L- histidinol to L-histidinaldehyde and then to L-histidine	Chromosome	27.2573	27.5199	26.4642	27.3455	27.6853	27.5667	27.976	27.308	26.3844	26.6451	25.7764	27.0937	26.6991	26.8638	25.4399	26.9429	25.343	26.1487	25.6747	25.5303	25.0946	25.9489	25.2539	26.8447	25.9264	24.7555	25.0446	25.6844	24.9555	23.9211	25.9547	25.7281	NaN	NaN	17.6849	NaN	NaN	NaN	NaN	NaN	NaN	18.9863
A0A6N4CRD3	Uncharacterized protein	ASJ32_05365 GO994_19455	SP(Sec/SPI)	Unknown	-	-	Chromosome	24.5639	24.7859	24.7929	25.0171	24.9125	25.1146	25.9411	25.5803	24.1663	25.8148	24.4189	24.9591	23.4675	22.5601	23.9726	24.6543	22.8216	23.0599	22.1847	24.0573	22.4952	23.0078	23.7832	23.3151	22.6488	23.0984	23.0405	23.3701	22.0547	22.3778	22.8663	23.2471	NaN	NaN	NaN	NaN	NaN	NaN	NaN	NaN	NaN	NaN
A0A6N4CRD4	Histidine ammonia-lyase (Histidase) (EC 4.3.1.3)	hutH ASJ32_06365	OTHER	Cytoplasmic	E	Aromatic amino acid lyase	Chromosome	26.225	26.0936	26.5983	25.8243	24.4046	24.3423	24.5674	24.1985	26.3297	26.0157	26.0888	25.4258	26.2655	25.9955	25.7748	25.7786	24.9509	24.748	26.7669	25.5693	22.6815	22.2955	21.2904	23.4927	26.3318	24.3045	25.7991	24.8797	26.1533	26.6231	25.092	24.2317	18.5628	17.914	18.2215	18.3481	NaN	NaN	NaN	NaN	18.2755	17.9025
A0A6N4CRD5	Spermidine/putrescine import ATP-binding protein PotA (EC 7.6.2.11)	potA ASJ32_07830	OTHER	CytoplasmicMembrane	P	Part of the ABC transporter complex PotABCD involved in spermidine putrescine import. Responsible for energy coupling to the transport system	Chromosome	21.5756	21.9375	22.7417	21.1616	21.1487	NaN	NaN	NaN	21.6182	NaN	22.2407	NaN	22.1694	23.8522	22.4325	20.5278	27.2572	24.8804	27.1107	27.194	27.1509	26.5321	26.0728	26.2687	26.1251	26.1894	26.7102	26.6836	27.3249	27.3793	27.0922	27.1085	NaN	NaN	NaN	NaN	16.9083	NaN	NaN	NaN	NaN	NaN
A0A6N4CRD6	TldD/PmbA family protein (Zn-dependent protease)	ASJ32_20895 GO994_05385	OTHER	Cytoplasmic	S	Zn-dependent proteases and their inactivated homologs	Chromosome	23.0811	23.5948	24.2219	23.2226	23.6206	24.5391	24.4187	24.689	22.7385	24.1719	22.653	23.8948	23.4991	23.1217	22.1628	24.0172	24.204	24.7761	24.096	23.7262	24.7912	24.8592	24.7659	24.6433	23.8321	24.8328	23.4628	23.9437	24.2629	23.8465	23.0816	22.7922	17.7534	17.1304	17.0391	15.6962	NaN	NaN	NaN	NaN	NaN	17.9221
A0A6N4CRD7	Sodium:proton antiporter	ASJ32_20045	OTHER	CytoplasmicMembrane	S	Na+-H+ antiporter family	Chromosome	NaN	NaN	NaN	NaN	NaN	NaN	NaN	NaN	NaN	NaN	NaN	NaN	NaN	NaN	NaN	NaN	20.5333	NaN	21.953	20.0645	20.55	NaN	19.5872	NaN	21.5352	NaN	22.0721	NaN	20.8819	21.176	20.4044	20.3758	NaN	NaN	NaN	NaN	NaN	NaN	NaN	NaN	NaN	NaN
A0A6N4CRD9	D-alanine--D-alanine ligase (EC 6.3.2.4) (D-Ala-D-Ala ligase) (D-alanylalanine synthetase)	ddl ASJ32_07215	OTHER	Cytoplasmic	F	Cell wall formation	Chromosome	25.5088	25.8802	23.8879	NaN	24.8638	25.6945	25.5966	24.3487	25.4265	NaN	25.4241	25.4919	25.9963	25.9743	NaN	25.4533	24.1662	NaN	25.2249	NaN	24.5936	25.2438	25.7717	23.8336	25.3299	25.4663	24.0478	NaN	25.2658	25.3974	NaN	NaN	NaN	NaN	NaN	NaN	NaN	NaN	NaN	NaN	NaN	NaN
A0A6N4CRE0	HDOD domain-containing protein	ASJ32_07885 GO994_20755	OTHER	Unknown	T	HDOD domain	Chromosome	NaN	NaN	NaN	NaN	24.4214	NaN	24.7856	NaN	NaN	NaN	NaN	NaN	NaN	NaN	NaN	NaN	23.5469	NaN	NaN	NaN	24.3659	23.6471	24.0632	NaN	21.439	23.8553	NaN	24.1457	NaN	23.1277	24.3962	23.6867	NaN	NaN	NaN	NaN	NaN	NaN	NaN	NaN	NaN	NaN
A0A6N4CRE2	Putative NAD(P)H nitroreductase (EC 1.-.-.-)	ASJ32_04565 GO994_04975	OTHER	Cytoplasmic	C	Nitroreductase family	Chromosome	23.8752	24.0111	23.5869	23.2276	24.4452	24.8534	25.5233	24.163	22.6246	23.6183	21.9114	22.8628	22.968	22.1256	22.3969	22.8383	20.9082	NaN	22.5945	21.1941	21.8277	22.8883	22.1081	22.2208	21.8568	21.7924	21.5095	21.2758	21.6689	21.3081	22.1622	21.2603	NaN	NaN	NaN	NaN	NaN	NaN	NaN	NaN	NaN	NaN
A0A6N4CRE4	Vitamin B12 transporter BtuB (Cobalamin receptor) (Outer membrane cobalamin translocator)	btuB ASJ32_21610	SP(Sec/SPI)	OuterMembrane	P	Involved in the active translocation of vitamin B12 (cyanocobalamin) across the outer membrane to the periplasmic space. It derives its energy for transport by interacting with the trans-periplasmic membrane protein TonB	Chromosome	NaN	NaN	NaN	NaN	NaN	NaN	NaN	NaN	NaN	NaN	NaN	NaN	NaN	NaN	NaN	NaN	21.5101	NaN	21.8797	NaN	21.7486	NaN	NaN	NaN	21.4919	22.2596	21.1561	22.1097	21.8744	21.4703	NaN	22.1551	19.0741	19.8432	19.8738	20.0147	19.2133	19.5682	18.9349	18.4015	19.1146	19.916
A0A6N4CRE6	Ligand-gated channel protein (TonB-dependent siderophore receptor)	ASJ32_06815 GO994_12210	SP(Sec/SPI)	OuterMembrane	P	Receptor	Chromosome	NaN	NaN	NaN	NaN	NaN	NaN	NaN	NaN	NaN	NaN	NaN	NaN	NaN	NaN	NaN	NaN	NaN	NaN	NaN	NaN	26.0985	26.2592	26.0394	26.0526	NaN	NaN	NaN	NaN	NaN	NaN	NaN	NaN	19.2692	18.4042	18.8274	18.6797	23.5713	23.7807	23.9677	23.3867	16.7756	18.3374
A0A6N4CRE7	Ion-translocating oxidoreductase complex subunit B (EC 7.-.-.-) (Rnf electron transport complex subunit B)	rnfB ASJ32_20095	OTHER	Unknown	C	Part of a membrane complex involved in electron transport	Chromosome	NaN	NaN	NaN	NaN	NaN	NaN	NaN	NaN	NaN	NaN	NaN	NaN	NaN	NaN	NaN	NaN	24.3729	24.634	22.9414	25.8975	23.9994	23.199	23.6745	24.4326	22.9479	24.2207	23.6454	24.2758	23.4496	23.5255	23.6904	25.2225	NaN	NaN	NaN	NaN	NaN	NaN	NaN	NaN	NaN	NaN
A0A6N4CRE8	Acyl-CoA thioesterase II	tesB ASJ32_20960 GO994_15820	OTHER	Cytoplasmic	I	Thioesterase-like superfamily	Chromosome	NaN	21.0886	22.683	NaN	21.0633	22.6553	22.1152	NaN	22.0029	21.5637	21.6729	21.7658	22.1362	NaN	NaN	NaN	21.9363	NaN	NaN	NaN	21.527	NaN	NaN	NaN	21.7762	21.3855	21.3332	21.7203	21.5115	22.8328	NaN	NaN	NaN	NaN	NaN	NaN	NaN	NaN	NaN	NaN	NaN	NaN
A0A6N4CRE9	Chromosome segregation protein SMC	ASJ32_22215	OTHER	Cytoplasmic	S	AAA domain, putative AbiEii toxin, Type IV TA system	Chromosome	27.3782	27.1882	27.7297	27.1414	27.4569	27.4541	27.33	27.2881	27.7016	27.165	27.6897	27.0045	27.0362	27.7544	26.791	26.3032	27.5334	27.1262	28.2647	26.9607	27.8316	27.824	27.5499	27.7884	28.4516	28.0034	28.0698	27.7174	27.6102	28.2605	26.8156	27.2082	19.9389	20.0434	20.2513	19.4711	20.1141	19.1999	20.1306	20.3001	20.7801	21.8407
A0A6N4CRF0	Multidrug ABC transporter permease	ASJ32_20745	OTHER	CytoplasmicMembrane	V	ABC-type multidrug transport system, permease component	Chromosome	NaN	NaN	NaN	NaN	NaN	NaN	NaN	NaN	NaN	NaN	NaN	NaN	NaN	NaN	NaN	NaN	NaN	NaN	21.2543	20.8727	NaN	NaN	NaN	NaN	NaN	NaN	NaN	NaN	NaN	NaN	NaN	NaN	NaN	NaN	NaN	NaN	NaN	NaN	NaN	NaN	NaN	NaN
A0A6N4CRF2	50S ribosomal protein L25	rplY ASJ32_12680 GO994_11770	OTHER	Cytoplasmic	J	This is one of the proteins that binds to the 5S RNA in the ribosome where it forms part of the central protuberance	Chromosome	30.0728	29.8625	29.7055	30.7169	29.5392	28.9782	29.0781	29.7044	29.9068	29.9034	29.7462	30.0705	30.297	30.7429	29.9788	30.1814	30.5459	29.9324	31.2343	29.8042	30.3538	30.5495	30.3991	30.3847	30.9766	30.822	30.2026	30.6384	30.1875	30.1634	29.9951	30.0817	NaN	19.8211	18.7857	19.1938	21.5719	NaN	21.4352	NaN	21.188	20.9585
A0A6N4CRF3	Peptide chain release factor 2 (RF-2)	prfB ASJ32_04615	OTHER	Cytoplasmic	J	Peptide chain release factor 2 directs the termination of translation in response to the peptide chain termination codons UGA and UAA	Chromosome	27.0948	26.908	25.4789	25.7967	27.4538	27.0613	27.0582	26.9724	27.1698	28.1077	25.2087	27.2585	26.9997	26.7312	24.9721	27.4829	24.0705	25.7442	23.4011	23.3705	22.906	23.9891	24.8576	24.6014	24.619	25.9576	24.9179	25.0801	24.1356	22.9298	24.9912	25.0821	NaN	NaN	NaN	NaN	NaN	NaN	NaN	NaN	NaN	NaN
A0A6N4CRF4	2-succinyl-5-enolpyruvyl-6-hydroxy-3-cyclohexene-1-carboxylate synthase (SEPHCHC synthase) (EC 2.2.1.9) (Menaquinone biosynthesis protein MenD)	menD ASJ32_05470	OTHER	Cytoplasmic	H	Catalyzes the thiamine diphosphate-dependent decarboxylation of 2-oxoglutarate and the subsequent addition of the resulting succinic semialdehyde-thiamine pyrophosphate anion to isochorismate to yield 2-succinyl-5-enolpyruvyl-6-hydroxy-3- cyclohexene-1-carboxylate (SEPHCHC)	Chromosome	22.2569	22.3875	22.8172	22.1001	22.2886	22.4958	21.7596	22.6233	22.4043	21.9192	NaN	NaN	21.9503	21.8131	NaN	21.3198	22.8166	NaN	NaN	NaN	23.1369	22.0564	23.237	21.9553	NaN	NaN	NaN	NaN	NaN	NaN	NaN	22.3252	NaN	NaN	NaN	NaN	NaN	NaN	NaN	NaN	NaN	NaN
A0A6N4CRF6	Haloacid dehalogenase	ASJ32_22150	OTHER	Cytoplasmic	S	HAD-hyrolase-like	Chromosome	NaN	NaN	NaN	NaN	NaN	NaN	NaN	NaN	NaN	NaN	NaN	NaN	NaN	NaN	NaN	NaN	24.7659	23.0623	25.1622	24.9404	25.714	24.3896	24.4587	23.9066	24.4491	24.9077	23.9521	23.683	24.5264	25.1055	23.5731	23.901	NaN	NaN	NaN	NaN	NaN	NaN	NaN	NaN	NaN	NaN
A0A6N4CRF7	Tryptophan synthase beta chain (EC 4.2.1.20)	trpB ASJ32_21010 GO994_15875	OTHER	Cytoplasmic	E	The beta subunit is responsible for the synthesis of L- tryptophan from indole and L-serine	Chromosome	25.156	25.0767	22.8626	24.7935	26.2018	25.4174	25.8078	25.2926	24.1906	22.2935	22.5433	23.2035	24.9556	23.945	20.6571	24.3602	25.642	23.8062	25.9706	24.3576	26.2861	25.9218	26.6972	26.3684	25.7828	25.7087	25.0752	23.9947	25.501	25.0763	22.0396	25.4555	NaN	NaN	NaN	NaN	NaN	NaN	NaN	NaN	NaN	NaN
A0A6N4CRF9	Type II secretion system F family protein (Type II secretion system protein F)	ASJ32_19885 GO994_15755	OTHER	CytoplasmicMembrane	NU	Type II secretion system (T2SS), protein F	Chromosome	NaN	NaN	NaN	NaN	NaN	NaN	NaN	NaN	NaN	NaN	NaN	NaN	NaN	NaN	NaN	NaN	24.252	25.2483	23.8561	23.2154	24.4565	22.85	24.5923	22.9677	24.9276	24.6657	24.4816	25.069	24.151	23.1908	24.0969	23.7453	NaN	NaN	NaN	NaN	NaN	NaN	NaN	NaN	NaN	NaN
A0A6N4CRG2	Iron-sulfur cluster carrier protein	ASJ32_12735	OTHER	CytoplasmicMembrane	D	Binds and transfers iron-sulfur (Fe-S) clusters to target apoproteins. Can hydrolyze ATP	Chromosome	22.6604	21.4044	22.8209	22.3075	24.4145	21.3813	22.1914	21.403	21.3223	21.9136	NaN	NaN	22.0695	23.2745	NaN	21.0272	25.1766	24.6229	25.15	25.0212	25.4354	25.56	25.7065	24.6232	25.2489	25.2133	24.8534	24.7163	25.133	24.1879	25.0661	25.4541	NaN	NaN	NaN	NaN	NaN	NaN	NaN	NaN	NaN	NaN
A0A6N4CRG5	BolA family transcriptional regulator (YciI family protein)	ASJ32_20795 GO994_04290	OTHER	Unknown	S	YCII-related domain	Chromosome	25.3715	24.3427	24.1151	24.2162	25.8025	25.3531	25.967	24.6189	25.2237	26.1263	24.1503	24.3785	24.449	24.3292	23.6645	24.6902	NaN	NaN	NaN	NaN	NaN	NaN	NaN	NaN	NaN	NaN	NaN	NaN	NaN	NaN	NaN	NaN	NaN	NaN	NaN	NaN	NaN	NaN	NaN	NaN	NaN	NaN
A0A6N4CRG8	4-hydroxybenzoyl-CoA thioesterase (Acyl-CoA thioesterase)	ASJ32_04725 GO994_04795	OTHER	Unknown	S	Thioesterase-like superfamily	Chromosome	NaN	20.5075	21.303	NaN	NaN	NaN	NaN	NaN	NaN	NaN	NaN	NaN	NaN	NaN	NaN	NaN	NaN	NaN	NaN	NaN	NaN	NaN	NaN	NaN	NaN	NaN	NaN	NaN	NaN	NaN	NaN	NaN	NaN	NaN	NaN	NaN	NaN	NaN	NaN	NaN	NaN	NaN
A0A6N4CRG9	Cold-shock protein (RNA chaperone/antiterminator CspA)	cspA ASJ32_06590 GO994_18815	OTHER	Cytoplasmic	K	'Cold-shock' DNA-binding domain	Chromosome	30.9473	30.2836	28.7607	28.5263	29.5763	29.3038	30.2605	28.0138	30.8572	30.7437	29.938	30.1528	29.5711	29.6455	28.8494	28.7218	25.171	27.1519	25.5981	24.8044	25.0559	24.5441	24.2127	23.1462	25.5488	26.2965	25.3906	25.9887	25.3524	24.877	26.0191	23.031	20.8354	20.8513	NaN	NaN	20.275	NaN	19.8516	NaN	19.672	21.1265
A0A6N4CRH5	RNA-binding protein	ASJ32_21600 GO994_00375	OTHER	CytoplasmicMembrane	S	RNA recognition motif	Chromosome	22.5654	22.2003	NaN	23.5289	22.409	NaN	NaN	NaN	22.2287	NaN	24.1216	23.8169	22.0881	21.9398	23.695	23.5804	28.6736	28.4049	28.0666	29.085	28.9035	28.7597	28.1181	28.3724	28.6106	28.3978	28.9209	28.8163	27.8985	27.6457	28.5118	28.4819	20.1996	19.1473	18.3679	19.302	20.0854	19.3746	NaN	18.8789	18.8501	19.4541
A0A6N4CRH6	DUF2007 domain-containing protein	ASJ32_06480 GO994_03050	OTHER	Cytoplasmic	S	Putative prokaryotic signal transducing protein	Chromosome	NaN	NaN	NaN	NaN	20.3189	20.5198	21.4204	NaN	NaN	NaN	NaN	NaN	NaN	NaN	NaN	NaN	NaN	NaN	NaN	NaN	NaN	NaN	NaN	NaN	NaN	NaN	NaN	NaN	NaN	NaN	NaN	NaN	NaN	NaN	NaN	NaN	NaN	NaN	NaN	NaN	NaN	NaN
A0A6N4CRH8	Uncharacterized protein	ASJ32_04775	LIPO(Sec/SPII)	Unknown	-	-	Chromosome	NaN	NaN	NaN	NaN	NaN	NaN	NaN	NaN	NaN	NaN	NaN	NaN	NaN	NaN	NaN	NaN	25.0701	NaN	23.0563	NaN	24.8418	23.6747	25.0798	NaN	23.8532	24.5198	24.7164	NaN	NaN	24.7491	NaN	24.8929	NaN	NaN	NaN	NaN	NaN	NaN	NaN	NaN	NaN	NaN
A0A6N4CRH9	tRNA-specific 2-thiouridylase MnmA (EC 2.8.1.13)	mnmA ASJ32_21500 GO994_07840	OTHER	Cytoplasmic	J	Catalyzes the 2-thiolation of uridine at the wobble position (U34) of tRNA, leading to the formation of s(2)U34	Chromosome	24.7676	24.7888	24.7862	23.94	25.2213	24.5377	24.5068	24.5333	24.9482	24.6154	24.3213	23.6529	24.8151	25.0222	23.3023	23.9832	23.2613	23.1878	23.7698	23.3092	22.9274	22.9105	23.8604	23.2048	24.0368	23.7099	23.578	23.5017	23.5183	22.6764	23.9172	23.2763	NaN	NaN	NaN	NaN	NaN	NaN	NaN	NaN	NaN	NaN
A0A6N4CRI0	Tyrosine recombinase XerC	xerC ASJ32_05195 GO994_19280	OTHER	Cytoplasmic	L	Belongs to the 'phage' integrase family. XerC subfamily	Chromosome	NaN	NaN	NaN	NaN	NaN	NaN	NaN	NaN	NaN	NaN	NaN	NaN	NaN	NaN	NaN	NaN	22.4207	NaN	21.6357	22.5632	NaN	NaN	NaN	NaN	NaN	NaN	NaN	NaN	23.02	NaN	NaN	22.9215	NaN	NaN	NaN	NaN	NaN	NaN	NaN	NaN	NaN	NaN
A0A6N4CRI3	GCN5 family acetyltransferase (GNAT family N-acetyltransferase)	ASJ32_05620 GO994_20195	OTHER	Cytoplasmic	K	FR47-like protein	Chromosome	23.454	23.2745	NaN	NaN	23.7837	23.0966	23.4574	22.0936	NaN	NaN	NaN	NaN	23.8589	NaN	NaN	NaN	NaN	NaN	NaN	NaN	NaN	NaN	NaN	NaN	NaN	NaN	NaN	NaN	NaN	NaN	NaN	NaN	NaN	NaN	NaN	NaN	NaN	NaN	NaN	NaN	NaN	NaN
A0A6N4CRJ0	Multifunctional 2',3'-cyclic-nucleotide 2'-phosphodiesterase/5'-nucleotidase/3'-nucleotidase	ASJ32_21390	LIPO(Sec/SPII)	Periplasmic	F	Belongs to the 5'-nucleotidase family	Chromosome	22.9089	22.1068	23.6826	24.3533	22.2516	NaN	20.9784	22.2248	21.714	21.7268	23.9159	22.0652	21.9889	22.1164	23.0958	23.409	26.7247	26.9504	26.646	27.8156	26.1614	26.0193	26.2609	26.4948	27.1622	27.1869	27.3317	27.6266	26.7238	26.486	27.4499	27.5213	NaN	NaN	NaN	NaN	NaN	NaN	18.4712	NaN	19.0671	17.4584
A0A6N4CRJ1	Transposase	ASJ32_21970	OTHER	Unknown	L	COG2801 Transposase and inactivated derivatives	Chromosome	NaN	NaN	NaN	NaN	NaN	NaN	NaN	NaN	NaN	NaN	NaN	NaN	NaN	NaN	NaN	NaN	22.2774	NaN	21.854	21.8382	21.5507	21.6427	22.095	NaN	21.4501	21.2541	21.6943	22.1006	NaN	NaN	21.5478	21.9379	NaN	NaN	NaN	NaN	NaN	NaN	NaN	NaN	NaN	NaN
A0A6N4CRJ2	Diacylglycerol O-acyltransferase (EC 2.3.1.20)	ASJ32_12895	OTHER	Cytoplasmic	Q	COG1020 Non-ribosomal peptide synthetase modules and related proteins	Chromosome	NaN	NaN	NaN	NaN	NaN	NaN	NaN	NaN	NaN	NaN	NaN	NaN	NaN	NaN	NaN	NaN	21.7255	NaN	NaN	22.1416	21.3617	22.0782	21.9046	21.972	21.5397	21.5988	NaN	21.7983	22.3741	22.3078	21.3632	21.6709	NaN	NaN	NaN	NaN	NaN	NaN	NaN	NaN	NaN	NaN
A0A6N4CRJ3	DnaT domain-containing protein	ASJ32_20765 GO994_04260	OTHER	Cytoplasmic	-	-	Chromosome	22.8828	21.9119	22.5888	22.5887	23.7537	23.8868	23.3502	23.6308	22.5719	23.2724	21.287	23.1005	22.4941	22.0472	21.5795	23.4391	22.0517	23.5721	21.5642	22.0829	21.7162	NaN	23.7823	24.3551	21.0739	23.6003	21.8211	22.1578	21.5129	21.2719	NaN	22.579	NaN	NaN	NaN	NaN	NaN	NaN	NaN	NaN	NaN	NaN
A0A6N4CRJ5	Ribose-phosphate pyrophosphokinase (RPPK) (EC 2.7.6.1) (5-phospho-D-ribosyl alpha-1-diphosphate) (Phosphoribosyl diphosphate synthase) (Phosphoribosyl pyrophosphate synthase) (P-Rib-PP synthase) (PRPP synthase) (PRPPase)	prs ASJ32_21395	OTHER	Cytoplasmic	F	Involved in the biosynthesis of the central metabolite phospho-alpha-D-ribosyl-1-pyrophosphate (PRPP) via the transfer of pyrophosphoryl group from ATP to 1-hydroxyl of ribose-5-phosphate (Rib-5-P)	Chromosome	28.91	29.2436	29.5835	29.2881	28.7082	28.8165	28.5519	29.1884	29.5591	29.0528	29.3543	28.9351	29.5159	29.1698	29.6682	29.2333	28.1178	28.863	28.4052	27.8858	26.6959	26.9478	26.707	26.6695	28.7697	29.2097	28.3739	28.39	29.1107	28.6782	27.813	27.7253	18.6518	21.2459	19.7732	20.6531	NaN	18.1561	NaN	NaN	20.3288	19.8988
A0A6N4CRJ7	Cation:dicarboxylase symporter family transporter (Sodium:glutamate symporter)	ASJ32_20955 GO994_15815	OTHER	CytoplasmicMembrane	U	Belongs to the dicarboxylate amino acid cation symporter (DAACS) (TC 2.A.23) family	Chromosome	NaN	NaN	NaN	NaN	NaN	NaN	NaN	NaN	NaN	NaN	NaN	NaN	NaN	NaN	NaN	NaN	24.021	NaN	24.7882	22.7314	23.0671	NaN	NaN	21.7923	25.1613	23.5894	25.3079	22.995	23.0268	23.4732	22.9152	22.4786	NaN	NaN	NaN	NaN	NaN	NaN	NaN	NaN	NaN	NaN
A0A6N4CRJ9	Putative transport protein ASJ32_20815	ASJ32_20815	OTHER	CytoplasmicMembrane	P	potassium ion transport	Chromosome	NaN	NaN	NaN	NaN	NaN	NaN	NaN	NaN	NaN	NaN	NaN	NaN	NaN	NaN	NaN	NaN	21.786	NaN	22.0237	22.3922	22.9713	22.1054	22.1991	21.5599	22.3354	21.3936	22.5689	21.7668	21.2269	22.393	21.9049	NaN	NaN	NaN	NaN	NaN	NaN	NaN	NaN	NaN	NaN	NaN
A0A6N4CRK1	Sugar ABC transporter substrate-binding protein (TonB family protein)	ASJ32_04925 GO994_04565	OTHER	Unknown	M	Interacts with outer membrane receptor proteins that carry out high-affinity binding and energy dependent uptake into the periplasmic space of specific substrates. It could act to transduce energy from the cytoplasmic membrane to specific energy- requiring processes in the outer membrane, resulting in the release into the periplasm of ligands bound by these outer membrane proteins	Chromosome	NaN	NaN	NaN	NaN	NaN	NaN	NaN	NaN	NaN	NaN	NaN	NaN	NaN	NaN	NaN	NaN	22.0534	22.7384	21.3917	24.3114	24.4359	25.3928	24.6599	25.2865	NaN	NaN	21.2937	22.3143	22.2904	23.3467	22.7025	24.1385	NaN	NaN	NaN	NaN	NaN	NaN	NaN	NaN	NaN	NaN
A0A6N4CRK2	Multifunctional fusion protein [Includes: Indole-3-glycerol phosphate synthase (IGPS) (EC 4.1.1.48); N-(5'-phosphoribosyl)anthranilate isomerase (PRAI) (EC 5.3.1.24)]	trpF trpC ASJ32_21005	OTHER	Cytoplasmic	E	Belongs to the TrpC family	Chromosome	24.1614	23.9091	23.8379	23.765	25.6161	24.1029	25.3833	24.7558	23.049	23.1538	21.6659	23.4591	23.4992	23.0255	20.3313	23.506	24.6856	24.9088	24.2061	24.1796	25.5596	25.7574	25.7787	25.2503	23.618	24.7582	23.9995	24.1247	24.3463	23.0858	23.866	24.5446	NaN	NaN	NaN	NaN	NaN	NaN	NaN	NaN	NaN	NaN
A0A6N4CRK3	Catalase-peroxidase (CP) (EC 1.11.1.21) (Peroxidase/catalase)	katG ASJ32_05355	OTHER	Cytoplasmic	P	Bifunctional enzyme with both catalase and broad- spectrum peroxidase activity	Chromosome	25.3433	24.4747	24.3075	25.2005	25.275	24.1332	23.9933	24.2383	23.9938	24.0422	24.0047	24.5945	25.4741	26.2735	24.4917	24.9912	27.2971	27.338	27.1508	27.5093	27.1266	26.9651	27.4817	27.0119	26.5911	27.4387	26.6047	26.909	28.033	27.7574	27.4083	28.3341	18.258	17.5949	18.6013	18.5626	17.6009	16.4988	NaN	15.9668	NaN	18.3491
A0A6N4CRK4	50S ribosomal protein L36	rpmJ ASJ32_06645 GO994_10760	OTHER	Unknown	J	Belongs to the bacterial ribosomal protein bL36 family	Chromosome	22.7767	21.4966	NaN	22.9583	22.3459	NaN	21.9808	NaN	23.1105	NaN	NaN	22.5708	23.0785	NaN	23.0655	22.8632	26.0295	24.9144	25.1005	27.1721	27.9343	27.97	27.8316	28.9185	25.0013	24.3257	23.7036	24.3957	23.9636	24.135	21.5078	26.0735	NaN	NaN	NaN	NaN	18.0032	NaN	19.7424	NaN	NaN	NaN
A0A6N4CRK6	DNA-binding protein VF530	ASJ32_05015 GO994_04455	OTHER	Unknown	S	DNA-binding protein VF530	Chromosome	24.3099	23.7908	24.3116	24.6316	24.5986	22.0827	24.7828	24.6665	24.0211	24.1801	24.2528	24.2914	23.4868	22.8078	24.4881	24.4839	NaN	NaN	NaN	NaN	NaN	NaN	NaN	NaN	NaN	NaN	NaN	NaN	NaN	NaN	NaN	NaN	NaN	NaN	NaN	NaN	NaN	NaN	NaN	NaN	NaN	NaN
A0A6N4CRK7	Two-component system response regulator (UvrY/SirA/GacA family response regulator transcription factor)	sirA uvrY ASJ32_12080 GO994_14640	OTHER	Cytoplasmic	T	helix_turn_helix, Lux Regulon	Chromosome	23.8363	21.4655	21.8901	23.3754	24.9017	21.5059	22.4513	22.243	21.3902	21.7606	NaN	20.6641	22.727	22.7565	NaN	21.9391	25.559	25.1647	24.9471	24.6584	26.1079	25.9588	26.8523	25.9301	25.002	25.6849	25.1943	25.1473	25.7026	25.4667	25.2805	26.0002	NaN	NaN	NaN	NaN	NaN	NaN	NaN	NaN	NaN	NaN
A0A6N4CRK8	Ribosomal RNA large subunit methyltransferase J (EC 2.1.1.266) (23S rRNA (adenine(2030)-N6)-methyltransferase) (23S rRNA m6A2030 methyltransferase)	rlmJ ASJ32_20655 GO994_03620	OTHER	Cytoplasmic	S	Specifically methylates the adenine in position 2030 of 23S rRNA	Chromosome	24.0155	24.2402	23.3094	22.9985	23.5334	23.0145	22.6724	22.6434	24.4022	23.5896	NaN	21.6844	24.2466	24.3026	NaN	22.8373	NaN	NaN	NaN	NaN	NaN	NaN	NaN	NaN	NaN	NaN	NaN	NaN	NaN	NaN	NaN	NaN	NaN	NaN	NaN	NaN	NaN	NaN	NaN	NaN	NaN	NaN
A0A6N4CRL1	3-oxoacyl-ACP synthase (EC 2.3.1.41) (Beta-ketoacyl-ACP synthase I)	fabB ASJ32_06695 GO994_10810	OTHER	Cytoplasmic	IQ	Belongs to the beta-ketoacyl-ACP synthases family	Chromosome	28.4255	28.281	28.2583	28.2802	28.695	28.8985	29.059	28.73	28.5118	29.2602	28.2756	28.6603	28.6502	28.0699	26.9933	28.6896	26.7624	27.2671	26.6415	26.7128	27.2566	26.6795	26.8497	27.6782	27.1157	27.5385	27.1289	26.9797	27.1436	27.0773	25.9917	26.6767	19.2212	19.0854	19.1154	18.636	19.1243	17.7346	NaN	18.95	17.4539	20.2663
A0A6N4CRL5	Adenylyl-sulfate kinase (EC 2.7.1.25) (APS kinase) (ATP adenosine-5'-phosphosulfate 3'-phosphotransferase) (Adenosine-5'-phosphosulfate kinase)	cysC ASJ32_20705	OTHER	Cytoplasmic	F	Catalyzes the synthesis of activated sulfate	Chromosome	22.512	21.2922	NaN	21.339	25.048	21.9648	22.6715	21.5246	20.6414	NaN	NaN	NaN	22.7162	22.645	NaN	NaN	24.2841	NaN	24.8102	21.5485	22.67	23.905	24.822	24.3975	24.2142	23.8951	24.1149	23.6811	24.5738	23.4661	NaN	23.9045	NaN	NaN	NaN	NaN	NaN	NaN	NaN	NaN	NaN	NaN
A0A6N4CRL7	1,4-dihydroxy-2-naphthoyl-CoA synthase (DHNA-CoA synthase) (EC 4.1.3.36)	menB ASJ32_05460 GO994_20380	OTHER	Cytoplasmic	H	Converts o-succinylbenzoyl-CoA (OSB-CoA) to 1,4- dihydroxy-2-naphthoyl-CoA (DHNA-CoA)	Chromosome	25.8037	26.1754	26.455	26.0482	25.8784	25.9652	26.1962	26.263	24.9586	25.6541	25.2135	25.5411	25.6676	25.5777	25.2753	25.8907	23.908	23.457	24.6491	23.4623	24.4923	24.4977	23.8159	24.5442	23.912	23.8592	23.447	23.3477	24.2022	24.3129	23.3306	23.8589	NaN	NaN	NaN	NaN	NaN	NaN	NaN	NaN	NaN	NaN
A0A6N4CRL9	Transcriptional regulator UhpA (Two-component system response regulator)	uhpA ASJ32_12185 GO994_14750	OTHER	Cytoplasmic	K	helix_turn_helix, Lux Regulon	Chromosome	NaN	NaN	NaN	NaN	NaN	NaN	NaN	NaN	NaN	NaN	NaN	NaN	NaN	NaN	NaN	NaN	22.9736	22.5376	22.496	23.175	22.5724	21.9561	22.2444	21.9274	21.8706	NaN	21.8562	22.7196	21.7818	NaN	22.9176	22.7377	NaN	NaN	NaN	NaN	NaN	NaN	NaN	NaN	NaN	NaN
A0A6N4CRM0	Epimerase (TIGR01777 family protein)	ASJ32_05135 GO994_04340	OTHER	Cytoplasmic	S	Domain of unknown function (DUF1731)	Chromosome	NaN	NaN	NaN	NaN	NaN	NaN	NaN	NaN	NaN	NaN	NaN	NaN	NaN	NaN	NaN	NaN	23.4758	NaN	23.7123	22.709	24.5831	23.4287	23.3911	22.9183	22.5727	22.887	23.1504	23.0707	23.3977	22.7097	22.5475	22.7861	NaN	NaN	NaN	NaN	NaN	NaN	NaN	NaN	NaN	NaN
A0A6N4CRM1	Succinate--CoA ligase [ADP-forming] subunit beta (EC 6.2.1.5) (Succinyl-CoA synthetase subunit beta) (SCS-beta)	sucC ASJ32_06745 GO994_10860	OTHER	Cytoplasmic	C	Succinyl-CoA synthetase functions in the citric acid cycle (TCA), coupling the hydrolysis of succinyl-CoA to the synthesis of either ATP or GTP and thus represents the only step of substrate-level phosphorylation in the TCA. The beta subunit provides nucleotide specificity of the enzyme and binds the substrate succinate, while the binding sites for coenzyme A and phosphate are found in the alpha …	Chromosome	28.7013	28.5196	28.1782	28.3059	28.2793	28.4008	28.5494	27.9951	28.3453	28.5271	28.1375	28.7954	29.1242	29.069	27.7971	28.982	27.9733	28.5762	28.0547	27.333	28.0716	28.2996	27.8127	28.1684	27.9234	27.8886	27.676	27.7669	28.1518	28.4606	27.3144	28.0699	20.874	19.7078	20.9992	19.9634	20.0421	21.0467	19.485	21.5254	20.2729	21.1264
A0A6N4CRM3	Orotidine 5'-phosphate decarboxylase (EC 4.1.1.23) (OMP decarboxylase) (OMPDCase) (OMPdecase)	pyrF ASJ32_21120	OTHER	Cytoplasmic	F	Catalyzes the decarboxylation of orotidine 5'- monophosphate (OMP) to uridine 5'-monophosphate (UMP)	Chromosome	26.1293	26.2281	25.611	26.1467	26.348	26.1414	27.103	25.8031	25.6577	26.8442	26.1127	26.8614	26.0455	25.1723	25.9428	26.3282	26.4467	28.5102	27.3306	26.0378	26.905	26.5921	26.7737	27.2785	27.0609	27.2435	26.9988	27.3736	26.8708	26.4063	27.4385	26.7854	NaN	NaN	20.1479	NaN	NaN	NaN	NaN	21.3742	NaN	NaN
A0A6N4CRM4	AAA family ATPase (ATP-binding protein)	ASJ32_20760 GO994_04255	OTHER	Cytoplasmic	L	IstB-like ATP binding protein	Chromosome	NaN	NaN	NaN	NaN	NaN	NaN	NaN	NaN	NaN	NaN	NaN	NaN	NaN	NaN	NaN	NaN	24.727	21.362	24.3364	23.8114	25.1672	24.6407	25.2474	24.1682	24.0304	24.2193	24.1826	23.8302	24.7972	23.6776	22.6389	25.2405	NaN	NaN	NaN	NaN	NaN	NaN	NaN	NaN	NaN	NaN
A0A6N4CRM7	LysR family transcriptional regulator	ASJ32_06800	TAT(Tat/SPI)	Cytoplasmic	K	Transcriptional regulator	Chromosome	19.447	NaN	NaN	NaN	NaN	NaN	NaN	19.3924	NaN	NaN	20.5316	NaN	NaN	NaN	NaN	20.7634	25.3612	25.6088	24.6824	25.5676	25.7163	25.7651	25.8854	25.1933	25.0098	25.1712	25.0352	25.6362	25.2571	24.7597	25.9873	25.434	NaN	NaN	NaN	NaN	17.2999	NaN	NaN	NaN	NaN	NaN
A0A6N4CRN3	Phosphoribosylglycinamide formyltransferase (EC 2.1.2.2) (5'-phosphoribosylglycinamide transformylase) (GAR transformylase) (GART)	purN ASJ32_12305	LIPO(Sec/SPII)	Cytoplasmic	F	Catalyzes the transfer of a formyl group from 10- formyltetrahydrofolate to 5-phospho-ribosyl-glycinamide (GAR), producing 5-phospho-ribosyl-N-formylglycinamide (FGAR) and tetrahydrofolate	Chromosome	25.6585	24.8859	25.2843	24.9542	25.8406	25.4094	25.3833	25.0062	24.5627	24.96	23.9432	25.3463	24.8375	24.1059	23.8587	24.9979	25.585	27.4834	25.2657	25.7504	24.532	26.26	26.681	26.186	24.1175	26.2211	24.6764	25.755	25.3818	24.1742	25.733	26.2433	NaN	19.4045	NaN	NaN	NaN	NaN	NaN	NaN	NaN	19.2601
A0A6N4CRN4	D-amino acid dehydrogenase (EC 1.4.99.-)	dadA ASJ32_06855	OTHER	CytoplasmicMembrane	C	Oxidative deamination of D-amino acids	Chromosome	23.4235	23.9222	24.4502	23.8915	23.3266	22.0695	24.137	24.96	23.6147	NaN	23.7702	24.4186	24.2826	24.0269	25.1029	24.3167	26.8208	26.4113	27.0084	26.7166	27.3886	27.0443	27.2951	26.6532	27.1768	26.6498	27.2807	26.9237	27.4693	27.3667	26.6761	27.2871	18.6526	18.3164	NaN	17.5626	18.0195	17.8956	NaN	18.9903	NaN	17.6401
A0A6N4CRN9	General secretion pathway protein F	gspF exeF ASJ32_05670 GO994_20145	OTHER	CytoplasmicMembrane	U	General secretion pathway protein F	Chromosome	NaN	NaN	NaN	NaN	NaN	NaN	NaN	NaN	NaN	NaN	NaN	NaN	NaN	NaN	NaN	NaN	25.2812	25.33	25.1125	25.3265	25.0849	24.765	24.0187	24.6938	25.0181	24.511	26.2135	24.477	25.0757	25.7011	24.2998	24.9115	NaN	NaN	NaN	NaN	NaN	NaN	NaN	NaN	NaN	NaN
A0A6N4CRP5	HAAAP family serine/threonine permease (Serine/threonine protein kinase)	ASJ32_06070 GO994_19155	OTHER	CytoplasmicMembrane	E	amino acid	Chromosome	NaN	NaN	NaN	NaN	NaN	NaN	NaN	NaN	NaN	NaN	NaN	NaN	NaN	NaN	NaN	NaN	NaN	NaN	22.3193	NaN	22.8235	NaN	NaN	24.2232	22.916	NaN	23.1227	NaN	21.7901	23.0006	NaN	21.5986	NaN	NaN	NaN	NaN	NaN	NaN	NaN	NaN	NaN	NaN
A0A6N4CRP6	Potassium transporter TrkA (SLC13 family permease)	ASJ32_20700 GO994_03665	OTHER	CytoplasmicMembrane	P	COG0471 Di- and tricarboxylate transporters	Chromosome	NaN	NaN	NaN	NaN	NaN	NaN	NaN	NaN	NaN	NaN	NaN	NaN	NaN	NaN	NaN	NaN	23.8087	NaN	24.4874	23.6953	NaN	23.3582	NaN	NaN	23.5413	NaN	24.6493	23.6712	21.7981	24.6218	25.0383	21.1733	NaN	NaN	17.8362	18.0014	NaN	NaN	NaN	NaN	NaN	NaN
A0A6N4CRP7	2',3'-cyclic-nucleotide 2'-phosphodiesterase/3'-nucleotidase (EC 3.1.3.6) (EC 3.1.4.16)	cpdB ASJ32_05610	LIPO(Sec/SPII)	Periplasmic	F	Belongs to the 5'-nucleotidase family	Chromosome	23.7084	22.2136	23.2879	24.2467	22.2964	20.8633	NaN	21.5662	21.5892	21.5132	22.8263	23.1907	22.7571	23.4614	23.5537	23.5935	26.6775	26.5386	26.5134	27.1637	25.3078	25.3611	25.44	25.7373	25.8923	25.7027	26.4831	26.6443	26.5094	26.5482	27.4442	26.9244	NaN	NaN	NaN	NaN	17.3583	NaN	NaN	NaN	NaN	NaN
A0A6N4CRP8	Gamma-glutamylputrescine oxidoreductase	ASJ32_20570	OTHER	Cytoplasmic	E	FAD dependent oxidoreductase	Chromosome	19.7215	19.3793	20.4251	NaN	20.0625	20.5019	20.1402	20.1007	NaN	NaN	NaN	NaN	20.9156	NaN	NaN	21.0523	22.408	NaN	21.2625	22.8443	22.0628	21.7453	22.318	22.5321	20.4598	21.3243	21.6096	21.2791	22.2638	21.7371	23.1927	23.4491	NaN	NaN	NaN	NaN	NaN	NaN	NaN	NaN	NaN	NaN
A0A6N4CRP9	Pseudouridine synthase (EC 5.4.99.-)	ASJ32_21490	OTHER	Cytoplasmic	J	Belongs to the pseudouridine synthase RsuA family	Chromosome	24.9749	24.5958	26.1433	25.9807	24.9792	25.7975	25.2164	26.1956	25.8114	25.4766	26.9922	26.2595	24.8248	24.7611	26	25.6332	21.9913	24.6296	22.0889	23.0532	22.9211	23.4233	23.0478	24.7788	22.2082	21.8995	NaN	23.1904	21.029	NaN	23.5942	22.0304	NaN	17.1969	NaN	NaN	NaN	NaN	NaN	NaN	NaN	NaN
A0A6N4CRQ2	Chemotaxis protein CheW	ASJ32_12415	OTHER	Cytoplasmic	T	Two component signalling adaptor domain	Chromosome	NaN	NaN	NaN	NaN	NaN	NaN	NaN	NaN	NaN	NaN	NaN	NaN	NaN	NaN	NaN	NaN	23.2085	24.2612	22.3212	22.721	23.1904	24.7525	24.5512	24.2309	22.4274	NaN	NaN	NaN	22.9171	NaN	NaN	24.124	NaN	NaN	NaN	NaN	NaN	NaN	NaN	NaN	NaN	NaN
A0A6N4CRQ5	Thiazole synthase (EC 2.8.1.10)	thiG ASJ32_06120	OTHER	Cytoplasmic	H	Catalyzes the rearrangement of 1-deoxy-D-xylulose 5- phosphate (DXP) to produce the thiazole phosphate moiety of thiamine. Sulfur is provided by the thiocarboxylate moiety of the carrier protein ThiS. In vitro, sulfur can be provided by H(2)S	Chromosome	25.4016	24.8305	25.3383	25.5071	25.4342	25.0711	25.7562	24.8878	24.5546	24.5982	22.9527	24.6582	24.9676	24.8409	24.3046	25.6467	24.8052	25.5921	25.2513	24.622	24.2257	24.5572	24.1084	25.1288	23.1346	23.4539	22.0071	24.6944	25.1824	25.1837	24.3343	24.5417	18.3161	17.9895	17.8735	17.7874	NaN	NaN	NaN	NaN	NaN	NaN
A0A6N4CRQ6	Peptidyl-prolyl cis-trans isomerase (EC 5.2.1.8)	ASJ32_20535 GO994_16385	OTHER	Cytoplasmic	G	Domain amino terminal to FKBP-type peptidyl-prolyl isomerase	Chromosome	NaN	NaN	NaN	NaN	NaN	NaN	NaN	NaN	NaN	NaN	NaN	NaN	NaN	NaN	NaN	NaN	25.1813	21.2706	25.679	24.0172	24.506	23.403	24.0018	23.5683	26.0218	24.6296	26.1637	23.9223	25.8826	25.8908	24.1757	25.0195	NaN	NaN	NaN	NaN	NaN	NaN	NaN	NaN	NaN	NaN
A0A6N4CRQ7	Ribosome-binding ATPase YchF	ychF ASJ32_21380	OTHER	Cytoplasmic	J	ATPase that binds to both the 70S ribosome and the 50S ribosomal subunit in a nucleotide-independent manner	Chromosome	27.8407	27.7551	28.1146	28.1208	27.6973	27.4838	27.8997	27.6553	27.3151	28.1963	28.0423	28.4423	27.4083	26.8497	26.4603	27.8897	26.4186	27.0291	26.0335	26.7226	26.3872	27.1274	26.8862	26.4959	26.1855	27.1874	26.3711	26.8463	26.7924	26.1627	26.9456	26.5767	NaN	18.3766	17.5991	18.3412	17.4154	17.8729	16.7418	16.9334	17.7566	19.1663
A0A6N4CRQ9	SpoVR family protein	ASJ32_07015 GO994_11995	OTHER	Cytoplasmic	S	SpoVR family	Chromosome	NaN	NaN	NaN	NaN	22.2393	21.3182	NaN	NaN	NaN	NaN	NaN	NaN	20.2566	NaN	NaN	NaN	NaN	NaN	21.2792	NaN	NaN	22.3127	21.3342	22.1043	NaN	NaN	NaN	NaN	NaN	NaN	NaN	NaN	NaN	NaN	NaN	NaN	NaN	NaN	NaN	NaN	NaN	NaN
A0A6N4CRR0	Uncharacterized protein	ASJ32_12480 GO994_15005	OTHER	Unknown	-	-	Chromosome	23.518	24.2151	22.249	22.9819	24.7345	24.3985	24.8857	23.7792	NaN	24.4217	22.1251	NaN	22.0937	NaN	NaN	NaN	22.9489	NaN	24.3919	23.748	NaN	NaN	NaN	23.5046	23.5047	NaN	22.3482	NaN	25.2002	24.0112	23.0282	22.9214	NaN	NaN	NaN	NaN	NaN	NaN	NaN	NaN	NaN	NaN
A0A6N4CRR1	Type II secretion system protein GspD	ASJ32_05660	SP(Sec/SPI)	OuterMembrane	NU	general secretion pathway protein D	Chromosome	23.006	22.2023	23.7164	23.8703	23.5667	22.9696	23.1088	23.3224	23.1162	22.7074	23.8575	23.4139	22.4922	23.0941	23.0401	23.2296	26.5278	26.2989	26.2477	27.0177	26.5845	26.5158	26.7867	26.4788	26.2267	26.3687	26.7096	26.5078	26.1504	26.334	26.3748	27.0338	24.8368	25.3493	25.252	25.4249	25.2842	25.3794	25.1628	25.7257	24.535	25.3743
A0A6N4CRS4	Regulatory protein RecX	recX ASJ32_05835 GO994_19980	OTHER	Cytoplasmic	S	Modulates RecA activity	Chromosome	NaN	NaN	NaN	NaN	NaN	NaN	NaN	NaN	NaN	NaN	NaN	NaN	NaN	NaN	NaN	NaN	NaN	NaN	NaN	21.3064	21.4385	NaN	21.8648	21.981	20.6031	NaN	20.9127	21.1341	NaN	NaN	20.7266	20.8743	NaN	NaN	NaN	NaN	NaN	NaN	NaN	NaN	NaN	NaN
A0A6N4CRS7	Cell division protein MukB	mukB ASJ32_21340	OTHER	Cytoplasmic	D	Cell division protein MukB	Chromosome	24.9141	24.2059	24.5391	25.9131	24.3408	23.8743	24.0565	24.0595	24.3001	23.8544	25.865	25.1357	25.3515	25.4308	25.752	25.5602	27.2774	27.6334	27.2336	27.4363	27.2354	27.2884	27.468	27.2601	27.434	27.3567	27.4917	27.4093	27.7206	27.5944	27.9137	27.6331	20.2057	19.7011	19.4705	19.3942	19.5405	18.9122	19.5561	18.7056	19.9655	19.503
A0A6N4CRT1	LPS-assembly lipoprotein LptE	lptE ASJ32_17030 GO994_05620	LIPO(Sec/SPII)	OuterMembrane	M	Together with LptD, is involved in the assembly of lipopolysaccharide (LPS) at the surface of the outer membrane. Required for the proper assembly of LptD. Binds LPS and may serve as the LPS recognition site at the outer membrane	Chromosome	NaN	NaN	NaN	NaN	NaN	NaN	NaN	NaN	NaN	NaN	NaN	NaN	NaN	NaN	NaN	NaN	26.8809	25.6798	27.1729	26.7884	26.9054	26.2987	25.9683	26.0046	27.5996	26.4313	27.553	26.5284	26.6171	27.1461	27.2425	26.8006	24.2859	23.8741	24.117	24.4007	23.7617	23.79	23.3265	23.881	23.8431	22.9142
A0A6N4CRT3	Cell shape-determining protein MreC (Cell shape protein MreC)	mreC ASJ32_06285 GO994_02855	OTHER	CytoplasmicMembrane	M	Involved in formation and maintenance of cell shape	Chromosome	NaN	NaN	NaN	NaN	NaN	NaN	NaN	NaN	NaN	NaN	NaN	NaN	NaN	NaN	NaN	NaN	26.3362	26.651	25.9093	27.1224	26.8159	26.4129	25.8092	26.1344	26.1316	26.7827	27.0827	27.0998	26.3227	26.0279	25.6321	26.6444	NaN	NaN	NaN	NaN	NaN	NaN	NaN	NaN	NaN	NaN
A0A6N4CRT5	DUF4823 domain-containing protein	ASJ32_07170 GO994_11125	LIPO(Sec/SPII)	Unknown	S	Domain of unknown function (DUF4823)	Chromosome	NaN	NaN	NaN	NaN	NaN	NaN	NaN	NaN	NaN	NaN	NaN	NaN	NaN	NaN	NaN	NaN	23.0949	NaN	23.3294	23.4385	23.8142	22.587	23.1389	22.8813	23.6146	23.0468	23.686	23.0884	23.1257	22.9919	23.1236	23.6918	NaN	NaN	NaN	NaN	NaN	NaN	NaN	NaN	NaN	NaN
A0A6N4CRU2	Lipopolysaccharide export system permease protein LptF	ASJ32_05905	OTHER	CytoplasmicMembrane	S	Predicted permease YjgP/YjgQ family	Chromosome	NaN	NaN	NaN	NaN	NaN	NaN	NaN	NaN	NaN	NaN	NaN	NaN	NaN	NaN	NaN	NaN	23.1796	NaN	23.3425	22.521	23.1873	22.5328	21.6412	22.0008	23.9969	22.3742	24.9419	22.9574	22.3725	22.5158	23.3541	22.2789	NaN	NaN	NaN	NaN	NaN	NaN	NaN	NaN	NaN	NaN
A0A6N4CRU3	MSHA biogenesis protein MshI	ASJ32_06335 GO994_02900	OTHER	Unknown	NU	PFAM Fimbrial assembly family protein	Chromosome	NaN	NaN	NaN	NaN	NaN	NaN	NaN	NaN	NaN	NaN	NaN	NaN	NaN	NaN	NaN	NaN	23.7627	23.1579	23.5852	24.9228	24.503	23.9213	23.9561	22.8456	23.6359	24.1848	24.324	24.1163	23.5191	24.2332	24.0438	24.2062	NaN	NaN	NaN	NaN	NaN	NaN	NaN	NaN	NaN	NaN
A0A6N4CRU9	Uncharacterized protein	ASJ32_05970	OTHER	Cytoplasmic	S	Protein of unknown function (DUF2590)	Chromosome	NaN	NaN	NaN	NaN	NaN	NaN	NaN	NaN	NaN	NaN	NaN	NaN	NaN	NaN	NaN	NaN	NaN	NaN	NaN	NaN	NaN	NaN	NaN	NaN	NaN	NaN	NaN	NaN	NaN	NaN	NaN	NaN	NaN	NaN	NaN	NaN	19.3292	17.8123	NaN	NaN	NaN	NaN
A0A6N4CRV0	Uncharacterized protein	ASJ32_17130	OTHER	Cytoplasmic	S	Uncharacterized protein conserved in bacteria (DUF2331)	Chromosome	21.6835	21.9405	21.4366	NaN	21.6474	21.8077	21.7127	21.1346	21.808	NaN	NaN	NaN	21.3589	20.4687	NaN	NaN	20.6938	NaN	21.2744	NaN	NaN	21.6862	22.1061	21.8963	21.4855	21.4741	NaN	NaN	21.814	21.8991	NaN	20.9227	NaN	NaN	NaN	NaN	NaN	NaN	NaN	NaN	NaN	NaN
A0A6N4CRV1	Putative transport protein ASJ32_06975	ASJ32_06975	OTHER	CytoplasmicMembrane	P	potassium ion transport	Chromosome	NaN	NaN	NaN	NaN	NaN	NaN	NaN	NaN	NaN	NaN	NaN	NaN	NaN	NaN	NaN	NaN	24.4045	21.5733	23.6658	23.6174	24.5764	23.8853	23.7858	23.7569	24.5898	23.7421	24.7948	24.3919	23.4142	23.7881	23.9265	24.5174	NaN	NaN	NaN	NaN	NaN	NaN	NaN	NaN	NaN	NaN
A0A6N4CRV4	Histidine utilization repressor	hutC ASJ32_06385 GO994_02950	OTHER	Cytoplasmic	K	UTRA	Chromosome	23.1	21.4113	22.2005	22.4263	24.1371	22.012	23.2296	22.186	NaN	21.9598	NaN	NaN	21.9214	22.7702	NaN	NaN	23.776	21.8478	23.9451	22.8436	23.6859	24.0719	24.9534	24.4165	23.6441	24.3726	23.2791	23.8078	24.4197	24.092	22.3567	24.279	NaN	NaN	NaN	NaN	NaN	NaN	NaN	NaN	NaN	NaN
A0A6N4CRV6	DNA polymerase III subunit chi	ASJ32_05895 GO994_19920	OTHER	Cytoplasmic	L	DNA polymerase III chi subunit	Chromosome	22.9244	23.0351	NaN	23.3077	22.7398	NaN	23.2486	NaN	23.5814	22.5698	NaN	NaN	22.6348	22.1552	NaN	NaN	NaN	NaN	NaN	NaN	NaN	NaN	NaN	NaN	NaN	NaN	NaN	NaN	NaN	NaN	NaN	NaN	NaN	NaN	NaN	NaN	NaN	NaN	NaN	NaN	NaN	NaN
A0A6N4CRV7	Alpha-amylase (EC 3.2.1.1)	ASJ32_19700	SP(Sec/SPI)	Extracellular	G	Aamy_C	Chromosome	NaN	NaN	NaN	NaN	NaN	NaN	NaN	NaN	NaN	NaN	NaN	NaN	NaN	NaN	NaN	NaN	NaN	NaN	NaN	NaN	NaN	NaN	NaN	NaN	NaN	NaN	NaN	NaN	NaN	NaN	NaN	NaN	NaN	NaN	NaN	NaN	NaN	NaN	NaN	NaN	NaN	NaN
A0A6N4CRW2	Uncharacterized protein	ASJ32_05960	OTHER	Unknown	S	Phage tail protein (Tail_P2_I)	Chromosome	NaN	NaN	NaN	NaN	NaN	NaN	NaN	NaN	NaN	NaN	NaN	NaN	NaN	NaN	NaN	NaN	NaN	NaN	NaN	NaN	NaN	NaN	NaN	NaN	NaN	NaN	NaN	NaN	NaN	NaN	NaN	NaN	NaN	NaN	NaN	NaN	NaN	NaN	NaN	NaN	NaN	NaN
A0A6N4CRW4	ABC transporter permease subunit (Peptide ABC transporter permease)	ASJ32_11770 GO994_12970	OTHER	CytoplasmicMembrane	V	N-terminal TM domain of oligopeptide transport permease C	Chromosome	NaN	NaN	NaN	NaN	NaN	NaN	NaN	NaN	NaN	NaN	NaN	NaN	NaN	NaN	NaN	NaN	22.5678	NaN	22.4366	23.1132	22.8185	NaN	NaN	22.6179	23.0163	NaN	22.7828	22.2062	NaN	NaN	NaN	22.6897	NaN	NaN	NaN	NaN	NaN	NaN	NaN	NaN	NaN	NaN
A0A6N4CRW6	Acyl-CoA desaturase	ASJ32_06435 GO994_03005	OTHER	CytoplasmicMembrane	I	desaturase	Chromosome	NaN	NaN	NaN	NaN	NaN	NaN	NaN	NaN	NaN	NaN	NaN	NaN	NaN	NaN	NaN	NaN	22.134	NaN	23.1469	21.9365	21.6346	NaN	NaN	NaN	NaN	NaN	22.9925	NaN	22.3793	22.7702	22.6193	22.4702	NaN	NaN	NaN	NaN	NaN	NaN	NaN	NaN	NaN	NaN
A0A6N4CRX2	Heme biosynthesis protein HemY	ASJ32_06005	OTHER	CytoplasmicMembrane	H	HemY protein N-terminus	Chromosome	NaN	NaN	NaN	NaN	NaN	NaN	NaN	NaN	NaN	NaN	NaN	NaN	NaN	NaN	NaN	NaN	26.5793	25.9191	26.0204	26.548	26.2319	26.0014	25.3691	25.8156	25.9772	25.67	26.2128	26.0279	25.9884	26.2434	26.2962	26.2661	NaN	NaN	NaN	NaN	NaN	NaN	NaN	NaN	NaN	NaN
A0A6N4CRX4	10 kDa chaperonin (GroES protein) (Protein Cpn10)	groES groS ASJ32_19815	OTHER	Cytoplasmic	O	Binds to Cpn60 in the presence of Mg-ATP and suppresses the ATPase activity of the latter	Chromosome	29.7221	29.3632	30.1562	30.0572	30.1654	30.436	30.432	31.1694	29.0627	29.535	29.7347	29.5411	29.3101	29.3622	29.8881	30.5259	24.2104	25.3705	23.6589	24.3457	23.6497	25.2263	25.4627	24.6173	23.7381	25.2296	23.849	24.5401	23.8925	23.1101	24.3643	25.3505	NaN	NaN	NaN	NaN	NaN	NaN	NaN	NaN	NaN	NaN
A0A6N4CRY1	OMP_b-brl domain-containing protein	ASJ32_06060	SP(Sec/SPI)	Unknown	M	Outer membrane protein beta-barrel domain	Chromosome	NaN	NaN	NaN	NaN	NaN	NaN	NaN	NaN	NaN	NaN	NaN	NaN	NaN	NaN	NaN	NaN	21.6223	NaN	NaN	21.5717	21.8722	20.7874	21.12	21.1691	22.6878	21.2023	21.0881	NaN	NaN	NaN	20.9309	20.9785	NaN	18.7088	17.8321	18.8248	18.2039	NaN	NaN	17.509	19.812	NaN
A0A6N4CRY4	Heme chaperone HemW	ASJ32_19740	OTHER	Cytoplasmic	H	Involved in the biosynthesis of porphyrin-containing compound	Chromosome	22.4365	20.9799	21.8962	21.6926	21.3577	NaN	20.6816	21.673	21.4048	22.6892	NaN	21.8759	NaN	21.4224	NaN	NaN	23.2194	23.2778	22.4593	22.6524	23.2788	23.1143	23.1914	22.765	21.7435	23.3058	22.162	22.039	22.654	21.8995	22.3365	22.9442	NaN	NaN	NaN	NaN	NaN	NaN	NaN	NaN	NaN	NaN
A0A6N4CRY7	Uncharacterized protein	ASJ32_16785	OTHER	CytoplasmicMembrane	S	GPR1/FUN34/yaaH family	Chromosome	NaN	NaN	NaN	NaN	NaN	NaN	NaN	NaN	NaN	NaN	NaN	NaN	NaN	NaN	NaN	NaN	26.7843	27.083	26.5493	26.3209	25.5004	26.0683	24.5641	25.2574	25.565	24.624	25.7539	24.765	25.2795	25.8291	25.7379	26.1316	19.4506	21.5666	21.7125	21.7083	21.9831	20.6165	20.8907	21.6949	22.9486	21.6336
A0A6N4CRZ3	Cation transporter	ASJ32_06560	OTHER	CytoplasmicMembrane	P	Belongs to the cation diffusion facilitator (CDF) transporter (TC 2.A.4) family	Chromosome	NaN	NaN	NaN	NaN	NaN	NaN	NaN	NaN	NaN	NaN	NaN	NaN	NaN	NaN	NaN	NaN	22.1856	NaN	22.2364	NaN	23.4532	22.352	22.4271	22.6339	22.1116	NaN	22.3272	NaN	NaN	NaN	NaN	NaN	NaN	NaN	NaN	NaN	NaN	NaN	NaN	NaN	NaN	NaN
A0A6N4CRZ4	DNA-binding protein HU (DNA-binding protein HU-beta)	hupB ASJ32_16840 GO994_08690	OTHER	Cytoplasmic	L	Histone-like DNA-binding protein which is capable of wrapping DNA to stabilize it, and thus to prevent its denaturation under extreme environmental conditions	Chromosome	30.7195	30.6434	30.9512	31.4117	30.4249	30.5715	30.543	31.5849	30.2441	30.3542	30.6082	30.8598	30.2949	30.6409	30.8065	31.0406	23.6844	24.0731	24.6566	24.7069	25.1322	25.5626	25.0918	24.9245	23.12	24.0148	23.6413	24.4185	24.366	24.0061	24.3036	23.5776	NaN	NaN	NaN	NaN	NaN	NaN	NaN	NaN	NaN	NaN
A0A6N4CRZ5	Uncharacterized protein	ASJ32_20015	OTHER	Cytoplasmic	C	FAD linked oxidases, C-terminal domain	Chromosome	20.863	20.3619	21.886	21.4905	19.1853	NaN	NaN	NaN	19.6463	19.8836	22.1626	20.3194	21.6976	20.7153	22.3608	19.7724	26.0718	24.8204	25.2632	26.1351	24.1352	23.5377	23.396	23.0921	25.189	25.4879	25.762	25.6466	25.7736	25.6747	26.5165	26.4485	NaN	NaN	NaN	16.6559	NaN	NaN	NaN	NaN	NaN	18.355
A0A6N4CRZ6	FxsA protein	ASJ32_19805	OTHER	CytoplasmicMembrane	S	FxsA cytoplasmic membrane protein	Chromosome	NaN	NaN	NaN	NaN	NaN	NaN	NaN	NaN	NaN	NaN	NaN	NaN	NaN	NaN	NaN	NaN	25.0293	24.3224	25.4552	25.0658	25.6539	24.1927	24.454	24.075	25.5452	23.992	25.8778	24.5676	24.8902	25.5417	25.3597	25.0572	NaN	NaN	NaN	NaN	NaN	NaN	NaN	NaN	NaN	NaN
A0A6N4CRZ7	Phosphatase NudJ (EC 3.6.1.-)	nudJ ASJ32_21495	OTHER	Cytoplasmic	F	Belongs to the Nudix hydrolase family. NudJ subfamily	Chromosome	22.2292	23.263	NaN	NaN	23.5665	NaN	22.6479	NaN	NaN	NaN	NaN	NaN	NaN	NaN	NaN	NaN	NaN	NaN	NaN	NaN	NaN	NaN	NaN	NaN	NaN	NaN	NaN	NaN	NaN	NaN	NaN	NaN	NaN	NaN	NaN	NaN	NaN	NaN	NaN	NaN	NaN	NaN
A0A6N4CRZ9	Type VI secretion protein	ASJ32_11950	OTHER	CytoplasmicMembrane	S	Bacterial Type VI secretion, VC_A0110, EvfL, ImpJ, VasE	Chromosome	23.8411	22.3894	NaN	24.6562	23.949	23.356	23.2669	NaN	23.9327	NaN	NaN	23.0921	23.8991	23.0964	24.1216	22.5491	23.9987	22.8158	23.5579	23.6422	24.356	24.1542	24.3619	23.7725	24.0577	24.4559	23.6081	22.9832	23.7811	23.949	22.7958	24.0527	NaN	NaN	NaN	NaN	NaN	NaN	NaN	NaN	NaN	NaN
A0A6N4CS00	Cobalamin ABC transporter ATP-binding protein	ASJ32_19585	OTHER	CytoplasmicMembrane	H	ATPases associated with a variety of cellular activities	Chromosome	NaN	NaN	NaN	NaN	NaN	NaN	NaN	NaN	NaN	NaN	NaN	NaN	NaN	NaN	NaN	NaN	NaN	29.6527	28.5711	29.6329	28.664	28.7924	28.5091	28.8847	27.8954	NaN	27.8957	NaN	28.3951	27.7955	29.3761	28.6662	NaN	NaN	NaN	NaN	NaN	NaN	NaN	NaN	NaN	NaN
A0A6N4CS01	Ribonuclease T (EC 3.1.13.-) (Exoribonuclease T) (RNase T)	rnt ASJ32_20050	OTHER	Cytoplasmic	L	Trims short 3' overhangs of a variety of RNA species, leaving a one or two nucleotide 3' overhang. Responsible for the end-turnover of tRNA specifically removes the terminal AMP residue from uncharged tRNA (tRNA-C-C-A). Also appears to be involved in tRNA biosynthesis	Chromosome	25.4141	25.8519	24.6776	25.9729	25.1753	25.5895	25.6256	26.0237	26.1579	25.9342	26.0583	26.3837	25.2946	25.0733	25.9075	25.2637	NaN	NaN	NaN	NaN	NaN	NaN	NaN	NaN	NaN	NaN	NaN	NaN	NaN	NaN	NaN	NaN	NaN	NaN	NaN	NaN	NaN	NaN	NaN	NaN	NaN	NaN
A0A6N4CS04	Aldoketomutase (EC 4.4.1.5) (Glyoxalase I) (Ketone-aldehyde mutase) (Methylglyoxalase) (S-D-lactoylglutathione methylglyoxal lyase)	gloA ASJ32_20065 GO994_13265	OTHER	Cytoplasmic	E	Lactoylglutathione lyase	Chromosome	24.4485	25.1666	24.7491	23.7826	24.8795	23.8124	24.9619	24.3102	25.3395	24.9213	24.1827	24.2914	24.3575	24.3176	23.1122	24.214	NaN	NaN	20.4618	NaN	NaN	NaN	NaN	NaN	NaN	NaN	NaN	20.971	NaN	NaN	NaN	NaN	NaN	NaN	NaN	NaN	NaN	NaN	NaN	NaN	NaN	NaN
A0A6N4CS05	PilZ domain-containing protein	ASJ32_16890 GO994_08640	OTHER	Cytoplasmic	-	-	Chromosome	20.7379	NaN	21.3719	21.0336	22.6803	21.0598	21.4237	NaN	21.619	21.1914	NaN	NaN	21.6364	23.1973	21.6209	21.1438	24.5054	22.0785	24.3608	24.2539	24.4164	24.8215	24.3742	23.788	24.2386	24.0555	24.6639	24.5966	24.4975	24.4526	24.1738	24.2506	NaN	NaN	NaN	NaN	NaN	NaN	NaN	NaN	NaN	NaN
A0A6N4CS07	Peptidyl-tRNA hydrolase (PTH) (EC 3.1.1.29)	pth ASJ32_21385	OTHER	Cytoplasmic	J	The natural substrate for this enzyme may be peptidyl- tRNAs which drop off the ribosome during protein synthesis	Chromosome	22.1389	21.1433	21.8296	22.8071	22.3642	21.2614	22.0246	21.3654	NaN	21.7425	22.1828	21.4782	21.8044	20.9959	21.5933	22.0204	25.3763	24.7742	24.6032	24.9624	25.8123	25.0916	25.5495	25.0092	25.2372	25.696	25.2863	25.0154	25.1834	24.7825	24.3657	25.2951	NaN	NaN	NaN	NaN	NaN	NaN	NaN	NaN	NaN	NaN
A0A6N4CS12	ABC transporter ATP-binding protein	ASJ32_19915	OTHER	CytoplasmicMembrane	GM	Wzt C-terminal domain	Chromosome	22.3851	21.7514	22.0573	22.7128	22.362	21.9647	22.0698	22.1276	22.6461	22.6275	23.5517	22.946	22.2221	22.8837	23.3748	22.5582	26.0121	25.3955	25.5085	26.1703	26.4407	25.2942	25.4771	26.0011	26.2869	25.6517	26.6134	25.895	25.8684	25.619	26.7971	26.3692	NaN	17.5326	17.5172	17.5311	17.0597	NaN	NaN	18.1324	NaN	18.4093
A0A6N4CS13	Translation initiation factor SUI1	ASJ32_19635	OTHER	Cytoplasmic	J	Translation initiation factor 1 (eIF-1 SUI1)	Chromosome	22.6279	23.5713	NaN	NaN	24.9585	23.3047	24.9665	24.6444	23.2545	NaN	NaN	22.2409	22.5415	22.196	NaN	23.9514	NaN	NaN	NaN	NaN	NaN	NaN	NaN	NaN	NaN	NaN	NaN	NaN	NaN	NaN	NaN	NaN	NaN	NaN	NaN	NaN	NaN	NaN	NaN	NaN	NaN	NaN
A0A6N4CS14	dTTP/UTP pyrophosphatase (dTTPase/UTPase) (EC 3.6.1.9) (Nucleoside triphosphate pyrophosphatase) (Nucleotide pyrophosphatase) (Nucleotide PPase)	ASJ32_06275 GO994_02845	OTHER	Cytoplasmic	D	Maf-like protein	Chromosome	23.2058	21.9455	23.4889	21.8344	23.7503	22.3632	23.3972	22.3825	23.5266	22.826	23.7492	22.7768	22.4489	22.854	NaN	22.2801	NaN	NaN	20.8192	NaN	NaN	NaN	NaN	21.8235	22.5088	NaN	22.262	NaN	21.302	22.5192	NaN	NaN	NaN	NaN	NaN	NaN	NaN	NaN	NaN	NaN	NaN	NaN
A0A6N4CS16	Autonomous glycyl radical cofactor GrcA	grcA ASJ32_21450 GO994_16955	OTHER	Cytoplasmic	S	Acts as a radical domain for damaged PFL and possibly other radical proteins	Chromosome	23.3615	22.8633	23.5768	23.2734	24.8294	22.7141	24.5822	22.6069	19.8212	22.4079	21.9424	22.9159	23.5302	23.0582	23.8195	24.609	21.2742	NaN	NaN	22.6645	22.5484	23.1364	NaN	23.1656	21.832	NaN	NaN	NaN	23.6458	22.1165	23.3325	21.9271	NaN	NaN	NaN	NaN	NaN	NaN	NaN	NaN	NaN	NaN
A0A6N4CS18	Alpha-L-glutamate ligase (Alpha-L-glutamate ligase-like protein)	ASJ32_21075 GO994_14320	OTHER	Cytoplasmic	HJ	Sugar-transfer associated ATP-grasp	Chromosome	NaN	NaN	NaN	NaN	NaN	NaN	NaN	NaN	NaN	NaN	NaN	NaN	NaN	NaN	NaN	NaN	25.3063	23.8621	24.826	25.5967	25.3652	24.9503	23.9822	24.3046	25.2611	24.9516	25.2509	25.1785	24.6713	25.0501	26.0105	25.8594	NaN	NaN	NaN	NaN	NaN	NaN	NaN	NaN	NaN	NaN
A0A6N4CS19	Diacylglycerol kinase (EC 2.7.1.107)	ASJ32_19575 GO994_08010	OTHER	CytoplasmicMembrane	M	Recycling of diacylglycerol produced during the turnover of membrane phospholipid	Chromosome	NaN	NaN	NaN	NaN	NaN	NaN	NaN	NaN	NaN	NaN	NaN	NaN	NaN	NaN	NaN	NaN	22.4343	NaN	23.894	NaN	22.6563	21.1416	NaN	NaN	23.0998	NaN	23.772	NaN	23.4948	23.6224	NaN	22.5112	NaN	NaN	NaN	NaN	NaN	NaN	NaN	NaN	NaN	NaN
A0A6N4CS22	Phospho-2-dehydro-3-deoxyheptonate aldolase (EC 2.5.1.54)	aroG ASJ32_11090 GO994_14005	OTHER	Cytoplasmic	E	Stereospecific condensation of phosphoenolpyruvate (PEP) and D-erythrose-4-phosphate (E4P) giving rise to 3-deoxy-D- arabino-heptulosonate-7-phosphate (DAHP)	Chromosome	27.6148	27.6084	27.7874	26.7675	28.246	27.6048	28.3365	27.5818	26.3884	26.9729	26.158	26.0756	27.8121	26.8688	26.0386	26.727	26.1132	25.9284	26.4827	25.2734	26.052	27.0371	25.6816	26.7708	25.8594	26.054	25.7277	25.6666	26.3028	26.1697	25.5032	25.91	18.1092	NaN	NaN	19.2478	20.1259	22.3308	20.8626	23.0558	19.1263	20.1432
A0A6N4CS23	Gamma-glutamyl-gamma-aminobutyrate hydrolase (Gamma-glutamyl-gamma-aminobutyrate hydrolase family protein)	ASJ32_05220 GO994_19305	OTHER	Cytoplasmic	S	Peptidase C26	Chromosome	20.2076	21.2484	21.05	20.6747	21.2351	22.3274	22.438	21.8207	NaN	21.4208	NaN	NaN	21.1287	NaN	NaN	22.079	NaN	NaN	NaN	NaN	NaN	NaN	NaN	NaN	NaN	NaN	NaN	NaN	NaN	NaN	NaN	NaN	NaN	NaN	NaN	NaN	NaN	NaN	NaN	NaN	NaN	NaN
A0A6N4CS24	Maleylacetoacetate isomerase	ASJ32_19355	OTHER	Cytoplasmic	G	Glutathione S-transferase, C-terminal domain	Chromosome	25.6156	25.6782	25.548	25.2042	26.723	26.7816	27.3833	26.5041	25.6226	26.535	23.963	26.3666	25.6447	25.7547	24.9552	25.9483	23.51	23.8669	23.2094	24.0981	24.1227	23.9922	25.2222	24.5172	23.308	23.5846	23.7102	23.9825	23.2255	22.8651	23.1791	23.1853	NaN	NaN	NaN	NaN	NaN	NaN	NaN	NaN	NaN	NaN
A0A6N4CS26	Endolytic peptidoglycan transglycosylase RlpA (EC 4.2.2.-)	rlpA ASJ32_21345	LIPO(Sec/SPII)	Unknown	M	Lytic transglycosylase with a strong preference for naked glycan strands that lack stem peptides	Chromosome	NaN	NaN	NaN	NaN	NaN	NaN	NaN	NaN	NaN	NaN	NaN	NaN	NaN	NaN	NaN	NaN	NaN	NaN	23.0513	NaN	NaN	NaN	NaN	NaN	NaN	NaN	22.5137	NaN	NaN	NaN	NaN	NaN	NaN	NaN	NaN	NaN	NaN	NaN	NaN	NaN	NaN	NaN
A0A6N4CS27	Outer membrane lipid asymmetry maintenance protein MlaD	mlaD ASJ32_16325 GO994_01905	OTHER	Unknown	Q	MlaD protein	Chromosome	NaN	NaN	NaN	NaN	NaN	NaN	NaN	NaN	NaN	NaN	NaN	NaN	NaN	NaN	NaN	NaN	25.522	24.4318	25.5256	25.6674	25.084	24.9789	24.3106	24.6498	25.545	25.2717	25.5157	25.2348	24.8611	25.2572	24.9434	24.8847	NaN	NaN	NaN	NaN	NaN	NaN	NaN	NaN	NaN	NaN
A0A6N4CS28	Secretin	ASJ32_19905	LIPO(Sec/SPII)	OuterMembrane	NU	Bacterial type II and III secretion system protein	Chromosome	23.0891	22.0664	23.6437	24.4129	23.6523	22.8167	22.7672	23.5531	22.4456	23.3008	24.4504	23.9776	22.9609	23.4857	23.8856	23.74	28.7365	27.6705	28.8123	29.1031	28.9534	28.4004	28.3837	28.2848	28.9893	28.6874	29.4515	29.1415	28.0885	28.4013	29.342	28.6206	26.0078	25.9153	25.7835	25.8946	26.1476	25.811	26.0427	25.948	26.2693	26.0735
A0A6N4CS29	Ferrous iron transport protein B	ASJ32_19625	OTHER	CytoplasmicMembrane	P	transporter of a GTP-driven Fe(2 ) uptake system	Chromosome	NaN	NaN	NaN	NaN	NaN	NaN	NaN	NaN	NaN	NaN	NaN	NaN	NaN	NaN	NaN	NaN	22.8576	23.1691	22.903	24.0038	23.817	23.531	22.979	23.746	22.7059	22.3496	22.5751	22.8024	21.8006	22.0866	22.2402	22.7514	NaN	NaN	NaN	NaN	NaN	NaN	NaN	NaN	NaN	NaN
A0A6N4CS30	Formimidoylglutamase (EC 3.5.3.8) (Formiminoglutamase) (Formiminoglutamate hydrolase)	hutG ASJ32_06375	OTHER	Cytoplasmic	E	Catalyzes the conversion of N-formimidoyl-L-glutamate to L-glutamate and formamide	Chromosome	23.0287	22.4444	22.9588	23.3202	20.5617	NaN	21.6083	20.4804	22.5142	24.4928	23.8034	24.5845	22.5544	22.2783	22.5138	23.4296	24.0251	23.9647	23.9515	24.9155	21.5253	20.9085	22.8568	22.261	23.7844	24.5336	23.2407	24.3731	24.032	23.342	23.8802	24.191	NaN	NaN	NaN	NaN	NaN	NaN	NaN	NaN	NaN	NaN
A0A6N4CS31	NAD-dependent dehydratase (NAD-dependent epimerase/dehydratase family protein)	ASJ32_19945 GO994_15630	OTHER	Unknown	M	epimerase dehydratase	Chromosome	NaN	NaN	NaN	NaN	NaN	NaN	NaN	NaN	NaN	NaN	NaN	NaN	NaN	NaN	NaN	NaN	23.4175	23.7678	23.3476	24.4824	23.841	24.088	23.3699	23.5188	23.9373	23.441	24.2481	24.5219	23.442	23.792	24.4691	23.8136	NaN	NaN	NaN	NaN	NaN	NaN	NaN	NaN	NaN	NaN
A0A6N4CS33	ArsR family transcriptional regulator (Winged helix-turn-helix transcriptional regulator)	ASJ32_05270 GO994_19355	OTHER	Cytoplasmic	K	helix_turn_helix ASNC type	Chromosome	23.6331	23.9251	23.2623	23.567	23.9489	24.2315	23.8295	23.8066	22.3546	22.8815	23.012	NaN	23.5655	22.805	22.904	22.9452	20.7052	NaN	22.4744	NaN	NaN	22.1037	21.5987	NaN	NaN	20.9202	NaN	NaN	22.6043	23.0842	22.2446	NaN	NaN	NaN	NaN	NaN	NaN	NaN	NaN	NaN	NaN	NaN
A0A6N4CS34	Acetyl-coenzyme A carboxylase carboxyl transferase subunit beta (ACCase subunit beta) (Acetyl-CoA carboxylase carboxyltransferase subunit beta) (EC 2.1.3.15)	accD ASJ32_19425 GO994_13470	OTHER	Cytoplasmic	I	Component of the acetyl coenzyme A carboxylase (ACC) complex. Biotin carboxylase (BC) catalyzes the carboxylation of biotin on its carrier protein (BCCP) and then the CO(2) group is transferred by the transcarboxylase to acetyl-CoA to form malonyl- CoA	Chromosome	25.0712	24.6663	24.941	25.6044	24.5652	23.9931	24.6297	24.151	24.1102	25.0053	25.5895	25.0348	25.4831	24.8303	25.8223	25.22	28.3619	27.9666	27.8394	28.7311	28.1706	28.2546	28.5299	28.1835	27.7446	28.3193	28.3683	28.2221	28.0877	28.1157	28.6471	28.6698	20.5806	20.2913	19.7627	18.9746	19.8925	18.944	19.2947	18.6301	19.1926	20.103
A0A6N4CS37	Transposase	ASJ32_20830	OTHER	Cytoplasmic	L	Integrase catalytic	Chromosome	NaN	NaN	NaN	NaN	NaN	NaN	NaN	NaN	NaN	NaN	NaN	NaN	NaN	NaN	NaN	NaN	22.8967	NaN	22.9999	NaN	23.3803	23.927	23.4934	NaN	22.7161	NaN	NaN	NaN	22.7342	NaN	NaN	NaN	NaN	NaN	NaN	NaN	NaN	NaN	NaN	NaN	NaN	NaN
A0A6N4CS38	PTS IIA-like nitrogen regulatory protein PtsN (PTS sugar transporter)	ptsN ASJ32_16375 GO994_01955	OTHER	Cytoplasmic	G	Phosphoenolpyruvate-dependent sugar phosphotransferase system, EIIA 2	Chromosome	23.257	22.2618	21.6377	22.9845	23.2123	22.2059	22.5338	22.5268	22.9138	23.6169	21.8549	22.5483	21.3034	NaN	NaN	22.1461	NaN	NaN	20.6785	NaN	NaN	NaN	NaN	NaN	20.849	21.0767	NaN	NaN	NaN	NaN	NaN	20.5712	NaN	NaN	NaN	NaN	NaN	NaN	NaN	NaN	NaN	NaN
A0A6N4CS41	Isochorismatase (EC 3.3.2.1)	ASJ32_11190 GO994_14110	OTHER	Cytoplasmic	Q	Isochorismatase	Chromosome	22.5611	22.2656	23.6229	21.5679	29.4999	28.7816	29.2077	29.0431	18.5299	NaN	18.6593	20.3151	21.7954	21.121	NaN	21.328	22.0921	22.5514	24.4916	22.3992	27.4204	29.9094	29.4391	28.7089	NaN	NaN	NaN	NaN	20.5939	23.8348	NaN	22.7224	NaN	NaN	NaN	NaN	20.0028	NaN	21.6922	NaN	NaN	NaN
A0A6N4CS42	HAD-IA family hydrolase (Haloacid dehalogenase)	ASJ32_05200 GO994_19285	OTHER	Cytoplasmic	S	HAD-hyrolase-like	Chromosome	22.2326	22.5779	22.0477	22.4283	23.4653	23.1171	22.8132	22.8888	22.1641	21.8595	NaN	22.0345	22.4756	NaN	21.9194	22.111	21.0439	NaN	21.2182	NaN	21.1245	22.3599	21.7107	22.6383	NaN	NaN	NaN	NaN	21.9895	22.6038	21.444	NaN	NaN	NaN	NaN	NaN	NaN	NaN	NaN	NaN	NaN	NaN
A0A6N4CS43	Peptidase S8 (S8 family serine peptidase)	ASJ32_19475 GO994_13560	SP(Sec/SPI)	Unknown	O	Subtilase family	Chromosome	18.7674	19.5162	19.7274	20.5277	23.1331	25.9341	25.654	25.8744	NaN	NaN	NaN	NaN	21.078	NaN	NaN	NaN	22.9345	23.8095	22.2647	25.0617	25.2311	26.3087	26.7411	26.3183	NaN	20.8167	NaN	24.1257	22.8203	22.5043	24.188	24.4051	NaN	NaN	NaN	NaN	NaN	NaN	NaN	NaN	NaN	NaN
A0A6N4CS44	Tyrosine recombinase XerD	xerD ASJ32_20880 GO994_05400	OTHER	Cytoplasmic	L	Phage integrase, N-terminal SAM-like domain	Chromosome	NaN	NaN	NaN	NaN	NaN	NaN	NaN	NaN	NaN	NaN	NaN	NaN	NaN	NaN	NaN	NaN	21.2333	NaN	20.9413	21.0955	21.9583	21.3689	20.5927	NaN	NaN	21.243	21.0111	NaN	21.3524	NaN	NaN	NaN	NaN	NaN	NaN	NaN	NaN	NaN	NaN	NaN	NaN	NaN
A0A6N4CS46	Uncharacterized protein	ASJ32_21285 GO994_12340	OTHER	Unknown	-	-	Chromosome	21.9226	20.646	NaN	NaN	21.901	21.2944	NaN	NaN	22.0806	21.9908	21.1201	NaN	NaN	NaN	NaN	NaN	NaN	NaN	NaN	NaN	NaN	NaN	NaN	NaN	NaN	NaN	NaN	NaN	NaN	NaN	NaN	NaN	NaN	NaN	NaN	NaN	NaN	NaN	NaN	NaN	NaN	NaN
A0A6N4CS47	Cell division protein DedD (DedD protein)	dedD ASJ32_19415 GO994_13460	OTHER	CytoplasmicMembrane	D	Sporulation related domain	Chromosome	24.0799	23.8239	25.8715	25.5085	23.6441	23.5167	23.4798	24.5667	23.689	25.2291	24.9346	24.8897	23.6186	23.8025	24.6193	25.6283	27.1543	28.0526	26.6202	28.9506	27.068	26.502	27.0586	27.672	26.9895	26.9101	27.1623	28.2177	26.3706	26.803	27.2969	27.6693	NaN	18.6098	16.9677	NaN	17.2351	NaN	NaN	17.2908	19.1969	18.4762
A0A6N4CS49	Uncharacterized protein	ASJ32_05215 GO994_19300	LIPO(Sec/SPII)	Cytoplasmic	-	-	Chromosome	NaN	NaN	NaN	NaN	NaN	NaN	NaN	NaN	NaN	NaN	NaN	NaN	NaN	NaN	NaN	NaN	23.4784	24.3176	23.8945	24.6791	22.8796	22.4545	23.5877	23.8881	22.4829	NaN	22.4355	23.2772	22.2534	22.6827	23.6154	23.074	NaN	NaN	NaN	NaN	NaN	NaN	NaN	NaN	NaN	NaN
A0A6N4CS52	Uncharacterized protein	ASJ32_11245	OTHER	CytoplasmicMembrane	S	relative of glutathione S-transferase, MAPEG superfamily	Chromosome	NaN	NaN	NaN	NaN	NaN	NaN	NaN	NaN	NaN	NaN	NaN	NaN	NaN	NaN	NaN	NaN	NaN	NaN	23.8635	22.6268	23.6856	21.7633	NaN	NaN	24.4118	22.2453	24.7654	NaN	22.893	23.5907	NaN	NaN	NaN	NaN	NaN	NaN	NaN	NaN	NaN	NaN	NaN	NaN
A0A6N4CS53	CinA-like protein	ASJ32_05250 GO994_19335	OTHER	Cytoplasmic	S	Belongs to the CinA family	Chromosome	NaN	NaN	NaN	NaN	NaN	NaN	NaN	NaN	NaN	NaN	NaN	NaN	NaN	NaN	NaN	NaN	23.1721	NaN	22.4134	NaN	24.2304	23.0483	22.6107	22.3557	22.852	NaN	NaN	NaN	22.5876	NaN	NaN	21.2113	NaN	NaN	NaN	NaN	NaN	NaN	NaN	NaN	NaN	NaN
A0A6N4CS56	DNA-binding protein Fis	fis ASJ32_20725 GO994_04220	OTHER	Cytoplasmic	K	Activates ribosomal RNA transcription. Plays a direct role in upstream activation of rRNA promoters	Chromosome	27.3713	27.7876	29.6392	28.6774	26.3937	26.4295	26.3301	27.355	27.9855	28.3588	29.3641	28.9064	27.6072	28.4608	29.6473	28.5866	25.5466	26.9446	26.9608	26.4855	26.4591	25.9948	25.3187	26.0769	26.6509	26.7402	25.9986	25.545	25.6771	26.4476	25.7571	25.7786	NaN	NaN	NaN	NaN	NaN	NaN	NaN	NaN	NaN	NaN
A0A6N4CS58	Cytochrome c1	ASJ32_16480 GO994_02060	SP(Sec/SPI)	Unknown	C	cytochrome c1	Chromosome	NaN	NaN	NaN	NaN	NaN	NaN	NaN	NaN	NaN	NaN	NaN	NaN	NaN	NaN	NaN	NaN	27.5269	23.8861	26.2989	27.6209	25.659	24.8945	25.4899	23.9399	27.0333	26.5763	27.2258	26.8064	26.8937	26.7091	27.826	27.799	NaN	NaN	NaN	NaN	NaN	NaN	NaN	NaN	NaN	NaN
A0A6N4CS63	Putative phosphoenolpyruvate synthase regulatory protein (PEP synthase regulatory protein) (PSRP) (EC 2.7.11.33) (EC 2.7.4.28) (Pyruvate, water dikinase regulatory protein)	ASJ32_19500	OTHER	Cytoplasmic	F	Bifunctional serine threonine kinase and phosphorylase involved in the regulation of the phosphoenolpyruvate synthase (PEPS) by catalyzing its phosphorylation dephosphorylation	Chromosome	NaN	NaN	NaN	20.985	21.0511	NaN	22.0151	21.6212	NaN	NaN	NaN	NaN	NaN	NaN	NaN	NaN	22.8809	NaN	22.3008	23.1182	23.6793	22.7973	23.7582	23.4646	NaN	NaN	22.325	NaN	NaN	NaN	NaN	23.5132	NaN	NaN	NaN	NaN	NaN	NaN	NaN	NaN	NaN	NaN
A0A6N4CS64	Glutathione synthase (RimK family alpha-L-glutamate ligase)	ASJ32_05300 GO994_19385	OTHER	Cytoplasmic	HJ	RimK-like ATPgrasp N-terminal domain	Chromosome	NaN	NaN	NaN	NaN	NaN	NaN	NaN	NaN	NaN	NaN	NaN	NaN	NaN	NaN	NaN	NaN	21.9086	21.2865	21.4472	21.2884	23.1111	23.0287	22.8908	22.3987	21.0944	20.2669	20.5188	NaN	20.7594	21.6076	NaN	22.0038	NaN	NaN	NaN	NaN	NaN	NaN	NaN	NaN	NaN	NaN
A0A6N4CS65	Fimbrial protein	ASJ32_05435	SP(Sec/SPI)	Extracellular	NU	Fimbrial protein	Chromosome	NaN	NaN	NaN	NaN	NaN	NaN	NaN	NaN	NaN	NaN	NaN	NaN	NaN	NaN	NaN	NaN	NaN	NaN	NaN	NaN	NaN	NaN	NaN	NaN	NaN	NaN	NaN	NaN	NaN	NaN	NaN	NaN	NaN	NaN	NaN	NaN	NaN	NaN	NaN	NaN	NaN	NaN
A0A6N4CS66	UTP--glucose-1-phosphate uridylyltransferase (EC 2.7.7.9) (UDP-glucose pyrophosphorylase)	ASJ32_20780	OTHER	Cytoplasmic	M	UTP-glucose-1-phosphate uridylyltransferase	Chromosome	25.2849	25.6543	25.4997	25.6418	25.8857	25.186	25.7482	25.7951	25.3586	25.4661	24.1722	25.8039	25.8587	25.8198	24.5025	25.112	23.7439	24.7537	24.2043	22.8021	22.5588	24.3303	23.7099	23.9262	23.1309	24.3663	22.0703	23.5373	23.5171	23.8465	21.7604	23.5231	NaN	NaN	NaN	NaN	NaN	NaN	NaN	NaN	NaN	NaN
A0A6N4CS69	Two-component system response regulator	ASJ32_06610	OTHER	Cytoplasmic	T	COG0745 Response regulators consisting of a CheY-like receiver domain and a winged-helix DNA-binding domain	Chromosome	NaN	21.6175	NaN	NaN	22.7052	NaN	NaN	21.8968	NaN	NaN	NaN	NaN	22.2594	21.1672	22.5071	NaN	25.246	25.4089	24.6669	24.2699	25.833	24.8483	26.7778	25.6134	24.6339	25.7101	24.4884	24.2123	24.4475	NaN	NaN	25.9294	NaN	NaN	NaN	NaN	NaN	NaN	NaN	NaN	NaN	NaN
A0A6N4CS74	Uncharacterized protein	ASJ32_05485	OTHER	Unknown	-	-	Chromosome	NaN	NaN	NaN	NaN	NaN	20.9943	21.1403	20.6425	21.8777	NaN	NaN	NaN	NaN	NaN	21.2242	NaN	NaN	NaN	NaN	NaN	NaN	NaN	NaN	NaN	NaN	NaN	NaN	NaN	NaN	NaN	NaN	NaN	NaN	NaN	NaN	NaN	NaN	NaN	NaN	NaN	NaN	NaN
A0A6N4CS77	Acyl-CoA thioesterase (Thioesterase)	ASJ32_05360 GO994_19450	OTHER	Unknown	S	thioesterase	Chromosome	24.0849	23.8787	23.1657	NaN	23.2406	24.4714	23.6965	24.4726	23.0344	24.4141	23.8954	23.6658	23.3534	23.3719	24.1742	24.847	NaN	NaN	NaN	NaN	NaN	NaN	NaN	NaN	NaN	NaN	NaN	NaN	NaN	NaN	NaN	NaN	NaN	NaN	NaN	NaN	NaN	NaN	NaN	NaN	NaN	NaN
A0A6N4CS79	Uncharacterized protein	ASJ32_06555	OTHER	Unknown	S	YjbD family (DUF3811)	Chromosome	28.0142	28.1234	28.7763	29.1073	28.1192	28.718	29.054	29.0202	27.387	28.322	27.9212	28.9359	27.1271	27.7426	27.4218	28.2136	25.0506	24.3884	23.3484	25.723	23.1295	24.1742	25.412	25.0986	24.4034	24.2915	23.567	25.3129	23.9595	24.3845	NaN	24.5143	NaN	NaN	NaN	NaN	NaN	NaN	NaN	NaN	NaN	17.9759
A0A6N4CS81	3-oxoacyl-ACP synthase	ASJ32_19240	OTHER	CytoplasmicMembrane	I	Catalyzes the condensation reaction of fatty acid synthesis by the addition to an acyl acceptor of two carbons from malonyl-ACP. Catalyzes the first condensation reaction which initiates fatty acid synthesis and may therefore play a role in governing the total rate of fatty acid production. Possesses both acetoacetyl-ACP synthase and acetyl transacylase activities. Its substrate specificity deter…	Chromosome	24.1458	23.6524	24.6268	22.9956	23.802	23.3534	23.9435	23.5168	24.1874	23.5347	23.5908	22.715	23.879	24.3227	22.8954	22.9275	23.506	NaN	24.6243	22.3282	23.7161	23.3973	22.7685	22.523	23.7267	23.5218	22.9759	22.2969	23.6344	24.5361	NaN	23.1945	NaN	NaN	NaN	NaN	NaN	NaN	NaN	NaN	NaN	NaN
A0A6N4CS83	META domain-containing protein	ASJ32_19305	LIPO(Sec/SPII)	Unknown	O	response to heat	Chromosome	NaN	NaN	NaN	NaN	NaN	NaN	NaN	NaN	NaN	NaN	NaN	NaN	NaN	NaN	NaN	NaN	27.2566	26.6505	27.2338	27.5936	27.6218	27.5373	27.5001	26.7391	26.6224	27.2097	27.4331	27.2323	27.2602	27.6052	28.2195	27.2803	NaN	NaN	NaN	NaN	17.6012	NaN	NaN	NaN	NaN	NaN
A0A6N4CS84	Zinc transporter	zntB ASJ32_05535	OTHER	CytoplasmicMembrane	P	CorA-like Mg2+ transporter protein	Chromosome	NaN	NaN	NaN	NaN	NaN	NaN	NaN	NaN	NaN	NaN	NaN	NaN	NaN	NaN	NaN	NaN	24.4994	NaN	23.9579	23.3191	23.8208	23.2508	22.3967	22.8373	24.4235	22.5555	23.8403	23.3099	23.1697	22.8377	NaN	23.5455	NaN	NaN	NaN	NaN	NaN	NaN	NaN	NaN	NaN	NaN
A0A6N4CS86	Protein exod	ASJ32_06065	OTHER	CytoplasmicMembrane	S	Exopolysaccharide synthesis, ExoD	Chromosome	NaN	NaN	NaN	NaN	NaN	NaN	NaN	NaN	NaN	NaN	NaN	NaN	NaN	NaN	NaN	NaN	25.9727	NaN	25.7654	26.1206	25.7425	25.8186	25.596	25.8402	25.6992	25.1284	26.457	25.9967	25.0317	25.9327	24.8974	25.1033	NaN	NaN	NaN	NaN	NaN	NaN	NaN	NaN	NaN	NaN
A0A6N4CS87	Glucose-6-phosphate isomerase (GPI) (EC 5.3.1.9) (Phosphoglucose isomerase) (PGI) (Phosphohexose isomerase) (PHI)	pgi ASJ32_18935 GO994_00425	OTHER	Cytoplasmic	G	Belongs to the GPI family	Chromosome	27.4138	27.684	25.1574	25.9157	27.6091	26.8854	26.8077	26.7824	27.1274	26.6499	25.3338	25.1866	27.6529	28.0235	24.6168	26.0529	24.3758	22.1998	25.1354	22.5093	24.1355	23.8544	23.5558	24.2319	24.2165	24.5119	23.4043	23.3081	24.7956	24.7303	21.7649	24.0851	NaN	NaN	NaN	NaN	NaN	NaN	NaN	NaN	NaN	NaN
A0A6N4CS90	ATP-dependent Zn protease	ASJ32_21065	LIPO(Sec/SPII)	Unknown	O	Putative ATP-dependant zinc protease	Chromosome	23.8037	NaN	24.229	24.7451	24.3	24.4963	NaN	24.4885	23.6232	24.4664	25.4676	23.5875	23.908	24.661	25.318	24.9036	26.7498	25.7135	26.8446	27.251	26.6855	26.0593	25.8205	26.0837	26.9682	26.6988	27.281	27.0397	26.287	26.3366	27.0509	26.9816	20.8998	20.7245	20.0381	19.9713	19.8657	20.0475	18.4929	19.5212	19.7171	20.2581
A0A6N4CS92	Fimbrial protein	ASJ32_05430	SP(Sec/SPI)	Extracellular	NU	Fimbrial protein	Chromosome	21.2016	21.6664	22.7189	NaN	21.6738	22.3336	21.9511	22.0695	21.8877	21.5502	21.6982	21.8614	21.1878	22.5362	NaN	NaN	21.2896	NaN	NaN	NaN	22.1476	21.7799	20.8282	21.9427	21.1582	21.1103	21.9252	21.9083	NaN	20.8268	NaN	20.6229	NaN	NaN	NaN	NaN	NaN	NaN	NaN	NaN	NaN	NaN
A0A6N4CS93	HTH-type transcriptional activator IlvY (Transcriptional regulator)	ilvY ASJ32_18925 GO994_00415	OTHER	Cytoplasmic	K	Transcriptional regulator	Chromosome	22.5585	NaN	NaN	NaN	22.2915	NaN	NaN	NaN	NaN	NaN	NaN	NaN	NaN	NaN	NaN	NaN	24.1757	24.032	23.9097	24.2638	23.5965	24.1123	24.7954	24.5746	22.7422	23.9272	22.7591	24.2927	23.448	NaN	NaN	24.4598	NaN	NaN	NaN	NaN	NaN	NaN	NaN	NaN	NaN	NaN
A0A6N4CS94	Thiamine biosynthesis protein ThiH	thiH ASJ32_06115	OTHER	Cytoplasmic	C	Biotin and Thiamin Synthesis associated domain	Chromosome	22.6275	NaN	24.8187	24.8404	25.0994	23.9368	24.1953	23.5498	NaN	NaN	NaN	25.1558	24.7359	24.3744	NaN	24.7437	23.3243	24.4803	23.7726	23.975	22.736	22.5488	23.708	23.0297	21.8584	21.458	NaN	NaN	23.2082	22.2543	23.6849	24.2107	18.4131	NaN	NaN	17.5639	NaN	NaN	NaN	NaN	NaN	NaN
A0A6N4CS95	Uncharacterized protein	ASJ32_20505	SP(Sec/SPI)	Unknown	-	-	Chromosome	23.7928	23.7142	24.7147	24.6742	23.6709	24.2623	23.2754	25.2697	23.3629	22.9411	24.0968	24.0121	23.6961	24.7257	25.1917	24.7352	NaN	NaN	NaN	NaN	NaN	NaN	NaN	NaN	NaN	NaN	NaN	NaN	NaN	NaN	NaN	NaN	NaN	NaN	NaN	NaN	NaN	NaN	NaN	NaN	NaN	NaN
A0A6N4CS97	Exoribonuclease 2 (EC 3.1.13.1) (Exoribonuclease II) (RNase II) (Ribonuclease II)	rnb ASJ32_05585	OTHER	Cytoplasmic	K	Involved in mRNA degradation. Hydrolyzes single-stranded polyribonucleotides processively in the 3' to 5' direction	Chromosome	27.5715	27.6814	26.5993	27.3059	26.8179	26.7516	26.9218	26.7748	27.6744	27.4861	27.663	27.3928	27.9795	27.9438	27.7321	27.4306	28.4266	27.7432	28.2881	27.9159	28.0689	28.2106	27.7141	27.569	28.5612	28.5216	28.0361	28.1408	27.6946	27.7964	27.5597	27.5938	20.9474	21.6264	21.1625	21.5015	20.9117	19.8718	20.8611	21.7636	21.3976	21.4793
A0A6N4CS98	Lipid A biosynthesis lauroyltransferase (EC 2.3.1.241) (Kdo(2)-lipid IV(A) lauroyltransferase)	lpxL ASJ32_15940	OTHER	CytoplasmicMembrane	M	Catalyzes the transfer of laurate from lauroyl-acyl carrier protein (ACP) to Kdo(2)-lipid IV(A) to form Kdo(2)- (lauroyl)-lipid IV(A)	Chromosome	NaN	NaN	NaN	NaN	NaN	NaN	NaN	NaN	NaN	NaN	NaN	NaN	NaN	NaN	NaN	NaN	25.4745	26.8473	24.8471	26.3428	24.8596	24.3685	25.1679	25.8214	25.2098	24.9067	25.8077	25.5253	25.6194	25.7424	26.8716	26.5079	NaN	NaN	NaN	NaN	NaN	NaN	NaN	NaN	NaN	NaN
A0A6N4CS99	Uncharacterized protein	ASJ32_18985	OTHER	Cytoplasmic	S	protein conserved in bacteria	Chromosome	NaN	NaN	NaN	NaN	NaN	NaN	NaN	NaN	NaN	NaN	NaN	NaN	NaN	NaN	NaN	NaN	24.2623	NaN	23.8657	NaN	23.5806	24.3202	23.5823	22.2769	24.9579	25.725	25.1519	24.4544	25.0769	25.1181	25.6644	24.574	NaN	NaN	NaN	NaN	NaN	NaN	NaN	NaN	NaN	NaN
A0A6N4CSA2	Uncharacterized protein	ASJ32_18975 GO994_00470	OTHER	CytoplasmicMembrane	-	-	Chromosome	NaN	NaN	NaN	NaN	NaN	NaN	NaN	NaN	NaN	NaN	NaN	NaN	NaN	NaN	NaN	NaN	23.4216	NaN	24.1524	24.5139	NaN	NaN	25.2018	22.3192	23.9078	NaN	24.7149	26.1383	NaN	23.9073	NaN	NaN	NaN	NaN	NaN	NaN	NaN	NaN	NaN	NaN	NaN	NaN
A0A6N4CSA3	4-aminobutyrate aminotransferase (EC 2.6.1.19)	ASJ32_20555	OTHER	Cytoplasmic	E	Belongs to the class-III pyridoxal-phosphate-dependent aminotransferase family	Chromosome	24.4164	NaN	NaN	23.8937	24.5315	24.4904	NaN	NaN	NaN	NaN	NaN	NaN	25.2705	23.7242	NaN	26.1582	26.9434	27.9575	25.1759	27.6158	27.0378	26.96	27.711	27.7791	27.3089	25.3947	24.6868	26.8681	26.3233	25.9336	28.3055	27.0366	NaN	NaN	NaN	NaN	NaN	NaN	NaN	NaN	NaN	19.0729
A0A6N4CSA4	1,4-dihydroxy-2-naphthoate octaprenyltransferase (DHNA-octaprenyltransferase) (EC 2.5.1.74)	menA ASJ32_05480	OTHER	CytoplasmicMembrane	H	Belongs to the MenA family. Type 1 subfamily	Chromosome	NaN	NaN	NaN	NaN	NaN	NaN	NaN	NaN	NaN	NaN	NaN	NaN	NaN	NaN	NaN	NaN	NaN	NaN	23.0186	NaN	NaN	NaN	NaN	NaN	23.321	NaN	23.3066	NaN	21.925	NaN	NaN	NaN	NaN	NaN	NaN	NaN	NaN	NaN	NaN	NaN	NaN	NaN
A0A6N4CSA6	Tryptophan synthase alpha chain (EC 4.2.1.20)	trpA ASJ32_21015	OTHER	Cytoplasmic	E	The alpha subunit is responsible for the aldol cleavage of indoleglycerol phosphate to indole and glyceraldehyde 3- phosphate	Chromosome	27.2759	26.8504	26.6728	26.7806	27.9348	27.2081	28.0689	27.0375	25.907	26.0715	24.7123	25.3654	26.8649	26.7685	25.4276	26.1164	26.6171	23.9853	26.9532	26.0338	27.2231	27.4889	27.1045	27.5893	26.2929	26.0388	26.1861	26.4801	26.5904	25.7492	26.4455	26.6136	NaN	NaN	NaN	NaN	NaN	NaN	NaN	NaN	NaN	NaN
A0A6N4CSA9	Phosphatidylcholine-sterol acyltransferase	ASJ32_16000	SP(Sec/SPI)	Extracellular	I	GDSL-like Lipase/Acylhydrolase	Chromosome	NaN	NaN	NaN	NaN	NaN	NaN	NaN	NaN	NaN	NaN	NaN	NaN	NaN	NaN	NaN	NaN	23.161	NaN	22.9756	24.7529	23.5432	23.4643	23.2684	23.6353	20.614	22.8719	22.294	23.6337	23.4171	23.2204	25.0179	24.6857	NaN	NaN	NaN	NaN	NaN	NaN	NaN	NaN	NaN	NaN
A0A6N4CSB0	FCD domain-containing protein (GntR family transcriptional regulator)	ASJ32_05635 GO994_20180	OTHER	Cytoplasmic	K	COG1802 Transcriptional regulators	Chromosome	22.6573	20.5416	NaN	NaN	21.4266	NaN	NaN	NaN	21.9311	20.815	NaN	NaN	23.0041	NaN	22.0262	22.6001	NaN	22.8837	NaN	21.5947	23.0003	22.975	23.4525	22.8394	NaN	22.4424	NaN	22.8435	22.2273	22.217	22.1774	23.0368	NaN	NaN	NaN	NaN	NaN	NaN	NaN	NaN	NaN	NaN
A0A6N4CSB2	LacI family transcriptional regulator (Substrate-binding domain-containing protein)	ASJ32_19030 GO994_00525	OTHER	Cytoplasmic	K	helix_turn _helix lactose operon repressor	Chromosome	20.1763	20.8723	20.9077	20.6176	21.4274	20.5255	21.4018	21.037	20.4192	20.3021	NaN	NaN	20.1628	20.6279	NaN	NaN	22.1109	NaN	21.4972	21.931	22.3456	21.7128	22.2199	21.5065	21.3774	21.1745	21.2954	20.7714	22.305	22.3339	21.2668	22.1894	NaN	NaN	NaN	NaN	NaN	NaN	NaN	NaN	NaN	NaN
A0A6N4CSB3	DNA-binding protein	ASJ32_20605	OTHER	Cytoplasmic	L	Belongs to the histone-like protein H-NS family	Chromosome	30.6257	30.9942	30.3165	31.0983	30.0153	30.5892	30.3051	31.2112	31.1464	31.1191	31.4931	31.8299	30.5178	31.0649	31.6402	31.4117	25.6853	26.2582	27.0319	25.4233	27.3937	26.6444	26.3318	26.6235	26.1919	26.415	26.3092	26.1438	25.624	25.6893	25.6453	26.1164	NaN	19.5017	NaN	NaN	20.2535	NaN	19.4669	NaN	NaN	NaN
A0A6N4CSB4	Ferrous iron transporter	fieF yiiP ASJ32_19100	OTHER	CytoplasmicMembrane	P	Belongs to the cation diffusion facilitator (CDF) transporter (TC 2.A.4) family	Chromosome	NaN	NaN	NaN	NaN	NaN	NaN	NaN	NaN	NaN	NaN	NaN	NaN	NaN	NaN	NaN	NaN	23.907	NaN	22.8795	22.9877	23.0913	22.3136	21.6098	NaN	22.925	NaN	NaN	NaN	22.3873	NaN	NaN	22.4163	NaN	NaN	NaN	NaN	NaN	NaN	NaN	NaN	NaN	NaN
A0A6N4CSB5	Large-conductance mechanosensitive channel	mscL ASJ32_20870	OTHER	CytoplasmicMembrane	M	Channel that opens in response to stretch forces in the membrane lipid bilayer. May participate in the regulation of osmotic pressure changes within the cell	Chromosome	NaN	NaN	NaN	NaN	NaN	NaN	NaN	NaN	NaN	NaN	NaN	NaN	NaN	NaN	NaN	NaN	24.835	NaN	25.3726	NaN	25.6057	24.805	24.1752	24.1888	25.4717	24.4201	25.6667	24.5275	24.2126	25.2476	23.4784	24.4897	NaN	NaN	NaN	NaN	NaN	NaN	NaN	NaN	NaN	NaN
A0A6N4CSB8	UPF0178 protein ASJ32_05530	ASJ32_05530 GO994_20285	OTHER	Cytoplasmic	S	Belongs to the UPF0178 family	Chromosome	22.605	22.3167	22.5123	22.5202	23.3159	22.9104	23.3135	23.0052	22.5571	23.7129	NaN	NaN	22.3437	NaN	NaN	22.5191	NaN	NaN	NaN	NaN	NaN	NaN	NaN	NaN	NaN	NaN	NaN	NaN	NaN	NaN	NaN	NaN	NaN	NaN	NaN	NaN	NaN	NaN	NaN	NaN	NaN	NaN
A0A6N4CSC0	Type II secretion system protein J	ASJ32_05690	OTHER	CytoplasmicMembrane	U	General secretion pathway protein J	Chromosome	NaN	NaN	NaN	NaN	NaN	NaN	NaN	NaN	NaN	NaN	NaN	NaN	NaN	NaN	NaN	NaN	23.6646	22.1632	22.5403	24.7367	23.9017	24.0918	23.4816	24.5666	23.5041	23.5193	23.8373	24.2664	23.1962	23.5556	23.2022	24.122	NaN	NaN	NaN	NaN	NaN	NaN	NaN	NaN	NaN	NaN
A0A6N4CSC2	Histidine kinase (EC 2.7.13.3)	ASJ32_19090 GO994_00595	OTHER	CytoplasmicMembrane	T	His Kinase A (phosphoacceptor) domain	Chromosome	NaN	NaN	NaN	NaN	NaN	NaN	NaN	NaN	NaN	NaN	NaN	NaN	NaN	NaN	NaN	NaN	23.1612	22.8079	22.9821	23.916	23.7854	22.9852	22.474	23.0172	22.7046	21.481	23.3886	22.8382	22.6757	22.7711	22.769	23.3809	NaN	NaN	NaN	NaN	NaN	NaN	NaN	NaN	NaN	NaN
A0A6N4CSC5	Magnesium-transporting ATPase, P-type 1 (EC 7.2.2.14) (Mg(2+) transport ATPase, P-type 1)	ASJ32_10545	OTHER	CytoplasmicMembrane	P	Cation transporter/ATPase, N-terminus	Chromosome	NaN	NaN	NaN	NaN	NaN	21.1905	NaN	22.4055	NaN	NaN	NaN	NaN	NaN	NaN	NaN	NaN	23.7641	22.491	23.1634	23.7589	21.7366	21.2273	21.4912	21.0751	22.1814	22.2019	22.5857	23.6098	25.5031	25.6277	26.5599	26.1275	NaN	NaN	NaN	NaN	NaN	NaN	NaN	NaN	NaN	NaN
A0A6N4CSD0	Glycine zipper 2TM domain-containing protein	ASJ32_05615 GO994_20200	LIPO(Sec/SPII)	OuterMembrane	M	Glycine zipper 2TM domain	Chromosome	NaN	20.7666	22.0593	NaN	NaN	NaN	NaN	NaN	NaN	NaN	NaN	NaN	NaN	NaN	NaN	NaN	25.8957	27.7227	26.2499	27.4062	26.3457	27.2652	26.8219	26.8083	26.7446	26.528	26.6718	27.0766	26.4032	26.7167	27.5801	27.4989	26.4162	26.7421	25.9046	25.7299	26.3468	26.2161	27.4905	26.7313	27.0548	25.2311
A0A6N4CSD2	Anhydrase (Gamma carbonic anhydrase family protein)	ASJ32_19135 GO994_00635	OTHER	Cytoplasmic	S	Bacterial transferase hexapeptide (six repeats)	Chromosome	22.987	23.5602	23.7598	23.7826	24.2369	24.3363	24.3295	24.0507	22.5782	24.0956	21.9903	24.2289	22.8892	22.5949	21.4587	23.7013	NaN	NaN	NaN	NaN	NaN	NaN	NaN	NaN	NaN	NaN	NaN	NaN	NaN	NaN	NaN	NaN	NaN	NaN	NaN	NaN	NaN	NaN	NaN	NaN	NaN	NaN
A0A6N4CSD4	Serine/threonine protein kinase	ASJ32_05740	OTHER	CytoplasmicMembrane	E	Serine transporter	Chromosome	NaN	20.5104	20.4093	NaN	NaN	NaN	NaN	NaN	NaN	NaN	21.2883	NaN	NaN	NaN	NaN	NaN	26.8072	26.7008	26.5248	27.7505	26.8449	25.3239	25.5709	26.5262	26.2414	26.6122	26.9122	26.8947	26.3977	26.5141	26.5661	27.4862	NaN	19.2478	19.4392	18.7035	18.5107	18.5738	18.3525	19.8218	19.4117	19.7519
A0A6N4CSD5	AraC family transcriptional regulator (Helix-turn-helix domain-containing protein)	ASJ32_18780 GO994_21070	OTHER	Cytoplasmic	K	Bacterial transcription activator, effector binding domain	Chromosome	NaN	NaN	NaN	NaN	22.4029	NaN	21.7509	NaN	NaN	NaN	NaN	NaN	NaN	NaN	NaN	NaN	22.1314	NaN	NaN	23.3791	22.0671	22.3818	23.3439	23.3525	NaN	NaN	NaN	NaN	23.0203	NaN	NaN	22.5098	NaN	NaN	NaN	NaN	NaN	NaN	NaN	NaN	NaN	NaN
A0A6N4CSD7	MSHA biogenesis protein MshJ	ASJ32_06330 GO994_02895	OTHER	Cytoplasmic	NU	carbon utilization	Chromosome	NaN	NaN	NaN	NaN	NaN	NaN	NaN	NaN	NaN	NaN	NaN	NaN	NaN	NaN	NaN	NaN	23.3305	NaN	23.0216	23.8888	24.2227	23.1324	22.2168	22.8062	23.1925	22.1641	24.1718	23.2459	23.3376	22.7174	24.5159	23.5145	NaN	NaN	NaN	NaN	NaN	NaN	NaN	NaN	NaN	NaN
A0A6N4CSD8	DUF885 family protein	ASJ32_16205 GO994_19815	LIPO(Sec/SPII)	OuterMembrane	S	protein conserved in bacteria	Chromosome	NaN	NaN	NaN	NaN	NaN	NaN	NaN	NaN	NaN	NaN	NaN	NaN	NaN	NaN	NaN	NaN	23.6129	24.5117	23.4252	24.8423	24.2484	23.8746	24.0832	24.0311	22.8713	22.9742	22.6034	23.5014	23.7854	24.0307	24.5725	24.676	NaN	NaN	NaN	NaN	NaN	NaN	NaN	NaN	NaN	NaN
A0A6N4CSD9	M24 family metallopeptidase (X-Pro aminopeptidase)	ASJ32_05630 GO994_20185	OTHER	Cytoplasmic	E	Creatinase/Prolidase N-terminal domain	Chromosome	27.3104	27.7439	27.7535	27.1955	27.0439	27.2347	27.1132	27.7297	27.1619	27.4394	26.4284	27.0806	27.097	26.8578	26.8119	26.8032	26.2377	26.0966	26.173	26.2073	26.6886	26.0487	26.1944	25.933	26.5674	26.7505	25.5372	25.9004	27.0869	26.5933	25.0035	25.2298	19.1072	18.3508	18.6736	19.063	18.1147	17.6276	19.0282	NaN	18.3526	20.3203
A0A6N4CSE1	Type II secretion system protein E (T2SS protein E) (Type II traffic warden ATPase)	ASJ32_05665	OTHER	Cytoplasmic	NU	COG2804 Type II secretory pathway, ATPase PulE Tfp pilus assembly pathway, ATPase PilB	Chromosome	NaN	NaN	NaN	NaN	NaN	NaN	NaN	NaN	NaN	NaN	NaN	NaN	23.1516	NaN	NaN	24.6782	26.5535	27.5758	25.5889	27.2039	26.5588	25.7269	26.1243	26.1938	25.4306	26.2352	25.7242	26.3879	25.5762	25.5933	26.3909	26.6321	19.9848	19.1136	19.2469	20.144	18.8918	NaN	19.4077	19.3205	20.0178	19.236
A0A6N4CSE3	HlyD_D23 domain-containing protein	ASJ32_20740	OTHER	Unknown	V	secretion protein HlyD family	Chromosome	NaN	NaN	NaN	NaN	NaN	NaN	NaN	NaN	NaN	NaN	NaN	NaN	NaN	NaN	NaN	NaN	25.7514	25.6618	25.3761	26.8281	25.5698	25.185	25.0539	25.7257	25.2203	25.3531	25.7564	26.01	24.9912	25.1805	25.1449	26.0198	NaN	16.7889	NaN	NaN	NaN	NaN	NaN	NaN	NaN	NaN
A0A6N4CSE6	Imidazolonepropionase (EC 3.5.2.7) (Imidazolone-5-propionate hydrolase)	hutI ASJ32_06380	OTHER	Cytoplasmic	F	imidazolonepropionase activity	Chromosome	23.0198	23.6061	23.5486	23.2166	21.9012	21.3432	21.9855	21.2421	23.2509	23.7799	22.9186	23.3177	23.6229	22.9093	21.909	23.4156	21.7491	22.9384	22.5811	22.4557	NaN	NaN	NaN	NaN	22.2269	23.3573	22.4496	22.9701	22.4801	22.2789	21.9346	21.9675	NaN	NaN	NaN	NaN	NaN	NaN	NaN	NaN	NaN	NaN
A0A6N4CSE8	Ion channel protein (Two pore domain potassium channel family protein)	ASJ32_16255 GO994_02685	OTHER	CytoplasmicMembrane	S	protein homooligomerization	Chromosome	NaN	NaN	NaN	NaN	NaN	NaN	NaN	NaN	NaN	NaN	NaN	NaN	NaN	NaN	NaN	NaN	23.0286	NaN	22.1155	22.1219	22.7466	23.1305	22.9711	22.5184	21.1441	NaN	22.0277	22.3837	NaN	21.6289	NaN	22.703	NaN	NaN	NaN	NaN	NaN	NaN	NaN	NaN	NaN	NaN
A0A6N4CSF0	Type II secretion system protein GspI	ASJ32_05685	OTHER	CytoplasmicMembrane	NU	General secretion pathway protein I	Chromosome	NaN	NaN	NaN	NaN	NaN	NaN	NaN	NaN	NaN	NaN	NaN	NaN	NaN	NaN	NaN	NaN	23.1176	NaN	23.1574	25.0913	23.5573	NaN	NaN	22.9403	23.3988	NaN	22.9678	NaN	22.6366	23.9174	NaN	NaN	NaN	NaN	NaN	NaN	NaN	NaN	NaN	NaN	NaN	NaN
A0A6N4CSF1	OMP_b-brl domain-containing protein	ASJ32_18885	LIPO(Sec/SPII)	Unknown	M	OmpA-like transmembrane domain	Chromosome	NaN	NaN	NaN	NaN	NaN	NaN	NaN	NaN	NaN	NaN	NaN	NaN	NaN	NaN	NaN	NaN	25.1406	23.8781	25.7866	24.8804	24.8331	24.3119	24.4639	23.605	24.9636	24.435	24.8981	25.2083	24.6672	24.3461	25.3905	24.3308	22.7704	22.4902	23.3343	23.6885	22.2978	23.0014	21.9681	22.1677	21.6598	22.8846
A0A6N4CSF4	Probable GTP-binding protein EngB	engB ASJ32_10695 GO994_00940	OTHER	Unknown	D	Necessary for normal cell division and for the maintenance of normal septation	Chromosome	26.5779	26.0274	26.7501	26.7817	27.0383	26.3606	25.8183	25.6444	26.7949	26.4517	26.5966	26.7964	26.4423	26.2708	26.1602	26.3311	25.9407	27.478	26.3007	24.8972	25.3583	26.8801	27.1178	27.1501	25.6954	27.119	25.099	26.2579	25.6531	25.0371	25.3631	26.4132	NaN	NaN	NaN	NaN	NaN	NaN	NaN	NaN	NaN	NaN
A0A6N4CSF6	HTH-type transcriptional repressor FabR (Transcriptional regulator)	fabR ASJ32_06430 GO994_03000	OTHER	Cytoplasmic	K	Transcriptional regulator	Chromosome	23.3818	21.997	23.7516	23.1808	23.2367	22.4692	22.7854	22.7505	23.164	22.7501	24.5344	22.6443	22.6391	23.2451	23.9498	22.4514	23.4386	22.7184	23.6156	23.3419	23.0797	23.4408	23.1628	23.4699	23.5711	24.0107	23.6202	23.5419	23.3962	23.3777	23.0039	23.0165	NaN	NaN	NaN	NaN	NaN	NaN	NaN	NaN	NaN	NaN
A0A6N4CSF9	1,4-alpha-glucan branching enzyme GlgB (EC 2.4.1.18) (1,4-alpha-D-glucan:1,4-alpha-D-glucan 6-glucosyl-transferase) (Alpha-(1->4)-glucan branching enzyme) (Glycogen branching enzyme) (BE)	glgB ASJ32_18505	OTHER	Cytoplasmic	G	Catalyzes the formation of the alpha-1,6-glucosidic linkages in glycogen by scission of a 1,4-alpha-linked oligosaccharide from growing alpha-1,4-glucan chains and the subsequent attachment of the oligosaccharide to the alpha-1,6 position	Chromosome	25.3091	25.891	24.9885	24.7424	26.1071	26.3034	26.1066	25.9706	25.2072	24.8333	24.0436	24.1	25.6718	25.2066	23.297	23.852	24.6021	22.1902	25.5276	22.7173	25.5632	24.9908	24.6178	23.6524	24.8193	24.379	24.3917	21.1639	24.8557	25.1157	20.5837	23.4663	NaN	NaN	NaN	NaN	NaN	NaN	NaN	NaN	NaN	NaN
A0A6N4CSG1	3'(2'),5'-bisphosphate nucleotidase CysQ (EC 3.1.3.7) (3'(2'),5-bisphosphonucleoside 3'(2')-phosphohydrolase) (3'-phosphoadenosine 5'-phosphate phosphatase) (PAP phosphatase)	cysQ ASJ32_05735	OTHER	Cytoplasmic	P	Inositol monophosphatase family	Chromosome	24.6105	23.5247	23.8853	24.2794	25.7377	24.3421	25.1847	23.8756	22.7163	23.4706	22.5937	23.3244	24.2173	22.0155	21.9692	24.2895	24.9812	26.0543	24.245	23.9225	25.3454	25.1986	25.4981	25.9228	23.5673	24.4799	22.598	24.2855	25.6396	24.8044	24.241	25.1328	NaN	NaN	NaN	NaN	NaN	NaN	NaN	NaN	NaN	NaN
A0A6N4CSG2	Translational regulator CsrA (Carbon storage regulator)	csrA ASJ32_05850 GO994_19965	OTHER	Unknown	J	A key translational regulator that binds mRNA to regulate translation initiation and or mRNA stability. Mediates global changes in gene expression, shifting from rapid growth to stress survival by linking envelope stress, the stringent response and the catabolite repression systems. Usually binds in the 5'- UTR	Chromosome	29.399	28.7196	31.2807	28.52	29.0888	29.1706	29.0747	29.5607	29.5238	29.2751	30.4471	28.8189	28.6465	30.3488	30.0441	29.1928	24.6058	NaN	24.7949	NaN	NaN	NaN	NaN	NaN	24.3509	NaN	NaN	NaN	25.1272	NaN	NaN	NaN	NaN	NaN	NaN	NaN	NaN	NaN	NaN	NaN	NaN	NaN
A0A6N4CSG9	Amino acid permease (Putrescine importer PuuP)	ASJ32_20545 GO994_16375	OTHER	CytoplasmicMembrane	E	amino acid	Chromosome	NaN	NaN	NaN	NaN	NaN	NaN	NaN	NaN	NaN	NaN	NaN	NaN	NaN	NaN	NaN	NaN	23.1853	NaN	22.8452	NaN	22.3205	NaN	NaN	NaN	22.6596	NaN	21.8547	20.8509	21.9648	22.5993	20.5362	22.3692	NaN	NaN	NaN	NaN	NaN	NaN	NaN	NaN	NaN	NaN
A0A6N4CSH0	Flavin prenyltransferase UbiX (EC 2.5.1.129)	ubiX ASJ32_18560 GO994_17840	OTHER	Cytoplasmic	H	Flavin prenyltransferase that catalyzes the synthesis of the prenylated FMN cofactor (prenyl-FMN) for 4-hydroxy-3- polyprenylbenzoic acid decarboxylase UbiD. The prenyltransferase is metal-independent and links a dimethylallyl moiety from dimethylallyl monophosphate (DMAP) to the flavin N5 and C6 atoms of FMN	Chromosome	23.9406	24.2344	24.6918	23.7715	24.0222	24.2018	23.614	24.4061	24.362	24.4575	24.2798	23.801	24.0734	24.5315	24.5533	23.1903	22	NaN	NaN	21.6752	NaN	NaN	22.6603	22.0724	22.2389	NaN	21.7584	NaN	NaN	NaN	NaN	21.1781	NaN	NaN	NaN	NaN	NaN	NaN	NaN	NaN	NaN	NaN
A0A6N4CSH2	Uncharacterized protein	ASJ32_05935	OTHER	Unknown	S	Rhs element vgr protein	Chromosome	NaN	NaN	NaN	NaN	NaN	NaN	NaN	NaN	NaN	NaN	NaN	NaN	NaN	NaN	NaN	NaN	21.2927	NaN	NaN	21.9584	21.4752	NaN	21.8448	NaN	NaN	NaN	NaN	22.1547	NaN	NaN	NaN	22.4947	NaN	NaN	NaN	NaN	NaN	NaN	NaN	NaN	NaN	NaN
A0A6N4CSH3	Glyceraldehyde-3-phosphate dehydrogenase (EC 1.2.1.-)	gap ASJ32_18495 GO994_17905	OTHER	Cytoplasmic	G	Belongs to the glyceraldehyde-3-phosphate dehydrogenase family	Chromosome	31.2776	31.3143	31.5299	31.2261	31.5933	32.2378	31.7912	32.0249	30.9341	31.3171	31.303	31.5054	31.2175	31.0753	31.3838	31.4168	30.3118	30.5645	30.8585	30.1965	29.8899	30.2817	29.5267	30.367	31.0239	30.368	30.5394	30.5948	31.3454	31.4349	30.2395	29.7263	24.6176	21.9671	22.9514	23.3588	23.4573	23.5352	22.0463	23.4197	22.7497	23.4392
A0A6N4CSH4	2-dehydro-3-deoxy-phosphogluconate aldolase (EC 4.1.2.14)	eda ASJ32_10805 GO994_01045	OTHER	Cytoplasmic	G	2-dehydro-3-deoxyphosphogluconate aldolase 4-hydroxy-2-oxoglutarate aldolase	Chromosome	23.2689	23.5241	23.3533	22.8882	23.8923	23.9021	24.6336	23.5134	22.8355	24.0713	22.5011	22.9015	22.89	21.0515	21.4584	22.9068	NaN	NaN	NaN	NaN	NaN	NaN	NaN	NaN	NaN	NaN	NaN	NaN	NaN	NaN	NaN	NaN	NaN	NaN	NaN	NaN	NaN	NaN	NaN	NaN	NaN	NaN
A0A6N4CSH7	WYL domain-containing protein	ASJ32_06545	OTHER	Cytoplasmic	K	WYL domain	Chromosome	24.6797	25.1428	26.502	25.5204	25.5388	24.8446	24.9963	24.9431	24.5912	24.6362	25.1961	24.8174	24.7763	25.4079	26.3169	24.8961	24.0625	23.8952	25.0152	24.0217	24.602	24.8407	24.5281	25.0655	23.9412	23.434	23.7822	24.0874	24.7852	25.1223	23.865	23.7744	NaN	NaN	NaN	NaN	NaN	NaN	NaN	NaN	NaN	NaN
A0A6N4CSH8	Alpha/beta hydrolase	ASJ32_15680	OTHER	CytoplasmicMembrane	I	hydrolases or acyltransferases (alpha beta hydrolase superfamily)	Chromosome	NaN	NaN	NaN	NaN	NaN	NaN	NaN	NaN	NaN	NaN	NaN	NaN	NaN	NaN	NaN	NaN	24.1303	24.3461	22.7437	24.3014	25.3363	24.576	25.0781	24.72	22.4772	22.8212	23.661	22.5878	23.7523	23.9096	24.8492	23.6826	NaN	NaN	NaN	NaN	16.8337	16.6725	NaN	NaN	NaN	NaN
A0A6N4CSH9	SRPBCC domain-containing protein	ASJ32_20595 GO994_16320	OTHER	Unknown	S	Activator of Hsp90 ATPase homolog 1-like protein	Chromosome	24.2017	24.5916	NaN	21.936	25.5177	24.6819	24.9908	24.3349	23.3941	23.5297	NaN	23.1178	23.4609	22.8214	NaN	20.8519	NaN	NaN	NaN	NaN	NaN	NaN	NaN	NaN	NaN	NaN	NaN	NaN	NaN	NaN	NaN	NaN	NaN	NaN	NaN	NaN	NaN	NaN	NaN	NaN	NaN	NaN
A0A6N4CSI0	RNA polymerase-binding transcription factor DksA	dksA ASJ32_18615	OTHER	Cytoplasmic	T	Transcription factor that acts by binding directly to the RNA polymerase (RNAP). Required for negative regulation of rRNA expression and positive regulation of several amino acid biosynthesis promoters. Also required for regulation of fis expression	Chromosome	27.1708	26.8483	26.4604	26.6867	27.4603	26.7405	27.3878	26.5906	26.1277	26.8284	25.4552	25.3863	26.6477	26.3477	25.8232	26.9115	25.7194	25.3958	25.7858	25.5254	26.2874	26.2248	25.9903	25.6758	25.6912	25.2012	25.4051	25.4352	25.8431	25.9017	24.2971	25.4124	NaN	NaN	NaN	NaN	NaN	NaN	NaN	NaN	NaN	NaN
A0A6N4CSI1	NAD(P)-dependent oxidoreductase (SDR family NAD(P)-dependent oxidoreductase)	ASJ32_05315 GO994_19400	OTHER	Cytoplasmic	S	Belongs to the short-chain dehydrogenases reductases (SDR) family	Chromosome	24.7845	25.2536	26.5805	24.6306	25.1397	24.6199	25.0168	25.0978	23.5854	23.8657	22.6758	23.974	25.0247	25.0663	23.3094	24.6127	22.9821	22.7636	22.7884	NaN	22.7625	23.7177	22.1058	22.672	21.8165	22.9866	21.72	21.9905	NaN	NaN	NaN	21.8422	NaN	NaN	NaN	NaN	NaN	NaN	NaN	NaN	NaN	NaN
A0A6N4CSI2	Inorganic pyrophosphatase (EC 3.6.1.1) (Pyrophosphate phospho-hydrolase) (PPase)	ppa ASJ32_18550 GO994_17850	OTHER	Cytoplasmic	C	Catalyzes the hydrolysis of inorganic pyrophosphate (PPi) forming two phosphate ions	Chromosome	29.6791	29.3238	27.5818	29.2457	29.2852	28.7729	29.3875	29.3716	28.918	28.5193	28.6242	28.757	29.2687	29.3555	28.1263	29.5356	24.4144	25.1398	23.9325	24.5983	24.7446	25.3253	26.0507	26.4278	23.4749	23.8412	22.8162	NaN	23.9629	24.6334	22.6673	24.1364	NaN	NaN	NaN	NaN	NaN	NaN	NaN	NaN	NaN	NaN
A0A6N4CSI7	Probable cytosol aminopeptidase (EC 3.4.11.1) (Leucine aminopeptidase) (LAP) (EC 3.4.11.10) (Leucyl aminopeptidase)	pepA ASJ32_05900 GO994_19915	OTHER	Cytoplasmic	E	Presumably involved in the processing and regular turnover of intracellular proteins. Catalyzes the removal of unsubstituted N-terminal amino acids from various peptides	Chromosome	27.2936	27.5734	28.0433	27.5812	27.3096	27.718	27.0615	28.0686	27.7532	27.5693	28.4693	27.7235	27.5843	27.5873	28.6975	27.5002	25.3024	25.5916	25.5316	25.2063	25.7911	26.222	25.5526	26.0236	24.6681	25.3088	23.3909	24.291	25.7145	26.4573	24.2514	24.8262	NaN	NaN	17.1533	NaN	NaN	NaN	NaN	NaN	NaN	NaN
A0A6N4CSI8	Phosphoribosylamine--glycine ligase (EC 6.3.4.13) (GARS) (Glycinamide ribonucleotide synthetase) (Phosphoribosylglycinamide synthetase)	purD ASJ32_19715	OTHER	Cytoplasmic	F	Belongs to the GARS family	Chromosome	28.6855	28.672	28.4515	28.0496	28.5569	28.4744	28.6676	28.2305	28.2724	28.7829	28.0642	28.4243	28.3094	27.8281	27.4501	28.6024	26.7551	27.2588	26.4007	27.0356	27.0666	26.602	26.7868	26.4352	26.8376	27.4548	26.5369	26.3884	26.7797	26.3177	25.483	26.8913	18.4829	19.3693	NaN	NaN	NaN	NaN	NaN	NaN	NaN	19.8254
A0A6N4CSJ3	50S ribosomal protein L3	rplC ASJ32_10905 GO994_01145	OTHER	Cytoplasmic	J	One of the primary rRNA binding proteins, it binds directly near the 3'-end of the 23S rRNA, where it nucleates assembly of the 50S subunit	Chromosome	31.2856	31.1586	31.8385	32.4783	30.2263	30.596	30.7911	31.6902	31.8503	31.6999	32.6339	32.8332	31.1067	31.7304	32.5514	31.9267	29.7967	29.4584	29.7972	30.32	30.0483	30.2723	30.1993	30.7142	30.0525	29.9559	29.6494	30.0352	29.9323	30.0904	29.3519	29.7926	21.2605	22.4199	21.7139	20.954	23.0848	20.963	21.269	21.0402	22.8076	22.9095
A0A6N4CSJ4	UPF0235 protein ASJ32_15780	ASJ32_15780 GO994_18685	OTHER	Cytoplasmic	S	Belongs to the UPF0235 family	Chromosome	NaN	NaN	21.5583	21.6578	21.4824	22.489	21.9748	22.1256	21.4681	21.7452	22.0804	20.6544	21.1613	20.1016	NaN	21.8792	NaN	NaN	NaN	NaN	NaN	NaN	NaN	NaN	NaN	NaN	NaN	NaN	NaN	NaN	NaN	NaN	NaN	NaN	NaN	NaN	NaN	NaN	NaN	NaN	NaN	NaN
A0A6N4CSJ5	Poly(A) polymerase I (PAP I) (EC 2.7.7.19)	pcnB ASJ32_18605	OTHER	Cytoplasmic	J	Adds poly(A) tail to the 3' end of many RNAs, which usually targets these RNAs for decay. Plays a significant role in the global control of gene expression, through influencing the rate of transcript degradation, and in the general RNA quality control	Chromosome	25.9675	25.4882	25.7126	25.5483	24.8717	24.174	24.2534	24.2308	26.1846	25.0258	26.7871	25.1071	26.0984	26.7279	26.5764	24.7292	27.333	25.9939	28.2729	26.4901	27.7414	27.5121	27.1042	27.1726	28.2662	27.5346	27.9343	26.7818	27.4805	27.3504	26.7196	26.7607	NaN	NaN	NaN	19.4804	21.6919	NaN	20.0596	NaN	19.6049	20.2248
A0A6N4CSJ6	Baseplate_J domain-containing protein	ASJ32_05965	OTHER	Unknown	S	Baseplate J-like protein	Chromosome	NaN	NaN	NaN	NaN	NaN	NaN	NaN	NaN	NaN	NaN	NaN	NaN	NaN	NaN	NaN	NaN	20.8658	22.0478	21.6253	22.5334	21.442	21.425	21.0004	20.8411	21.3532	NaN	21.5808	22.139	21.3522	22.502	21.5528	22.4701	NaN	NaN	NaN	NaN	NaN	NaN	NaN	NaN	NaN	NaN
A0A6N4CSJ7	Histidine kinase (EC 2.7.13.3)	ASJ32_06605	OTHER	CytoplasmicMembrane	T	Histidine kinase	Chromosome	NaN	NaN	NaN	NaN	NaN	NaN	NaN	NaN	NaN	NaN	NaN	NaN	NaN	NaN	NaN	NaN	22.546	NaN	23.5808	NaN	23.8998	NaN	NaN	NaN	NaN	NaN	24.0209	NaN	24.4709	23.8149	NaN	23.2127	NaN	NaN	NaN	NaN	NaN	NaN	NaN	NaN	NaN	NaN
A0A6N4CSJ8	Transcriptional regulator	ASJ32_19780	OTHER	Cytoplasmic	K	DNA-binding transcription factor activity	Chromosome	NaN	NaN	NaN	NaN	NaN	NaN	NaN	NaN	NaN	NaN	NaN	NaN	NaN	NaN	NaN	NaN	23.4706	NaN	22.6145	NaN	24.3045	24.249	23.5968	22.6019	21.6001	21.8867	22.3219	NaN	22.9164	21.9576	23.2768	23.3846	NaN	NaN	NaN	NaN	NaN	NaN	NaN	NaN	NaN	NaN
A0A6N4CSK0	RDD domain-containing protein	ASJ32_05915	OTHER	CytoplasmicMembrane	S	RDD family	Chromosome	NaN	NaN	NaN	NaN	NaN	NaN	NaN	NaN	NaN	NaN	NaN	NaN	NaN	NaN	NaN	NaN	24.5057	24.0177	23.6283	24.1651	24.309	23.1749	23.8998	23.0629	24.3372	25.076	25.322	26.1826	24.0487	23.9691	NaN	24.6745	NaN	NaN	NaN	NaN	NaN	NaN	NaN	NaN	NaN	NaN
A0A6N4CSK3	LysR family transcriptional regulator (Transcriptional regulator)	ASJ32_15835 GO994_18740	OTHER	Cytoplasmic	K	Transcriptional regulator	Chromosome	NaN	NaN	NaN	NaN	NaN	NaN	NaN	NaN	NaN	NaN	NaN	NaN	NaN	NaN	NaN	NaN	22.9836	NaN	22.6506	22.3438	23.3605	23.388	23.7805	23.0209	21.872	22.4239	22.2683	22.6109	21.2856	22.2305	21.9461	22.4789	NaN	NaN	NaN	NaN	NaN	NaN	NaN	NaN	NaN	NaN
A0A6N4CSK5	50S ribosomal protein L14	rplN ASJ32_10955 GO994_01195	OTHER	Cytoplasmic	J	Binds to 23S rRNA. Forms part of two intersubunit bridges in the 70S ribosome	Chromosome	26.2594	26.1728	26.421	26.9076	25.681	25.4114	25.5427	25.5212	26.6502	26.1093	28.478	27.1835	27.5544	26.6611	28.7107	27.466	29.4819	28.8574	29.1728	29.713	29.6341	29.4103	29.6913	29.34	29.8646	29.4208	29.6185	29.2914	29.3352	28.9175	28.5015	29.7972	20.4653	21.263	19.6581	20.1914	20.4611	19.9845	20.3047	20.083	21.3982	20.8312
A0A6N4CSK6	LysR family transcriptional regulator	ASJ32_18655 GO994_17745	OTHER	Cytoplasmic	K	transcriptional regulator	Chromosome	20.7705	20.3349	NaN	NaN	21.1277	20.963	NaN	20.6027	20.8197	NaN	NaN	NaN	NaN	NaN	NaN	NaN	22.8591	NaN	23.0117	NaN	23.6368	22.8445	22.7748	22.458	22.9225	22.8675	22.8549	22.025	23.6963	22.8919	22.6122	22.4279	NaN	NaN	NaN	NaN	NaN	NaN	NaN	NaN	NaN	NaN
A0A6N4CSK7	Gonadoliberin III	ASJ32_21070 GO994_14315	OTHER	CytoplasmicMembrane	E	7 transmembrane helices usually fused to an inactive transglutaminase	Chromosome	NaN	NaN	NaN	NaN	NaN	NaN	NaN	NaN	NaN	NaN	NaN	NaN	NaN	NaN	NaN	NaN	26.9544	26.1035	27.0985	26.3847	26.8436	25.9037	25.9247	26.019	27.2878	26.1138	27.5994	26.6298	27.1832	26.5625	27.0321	26.7462	NaN	NaN	NaN	NaN	16.458	NaN	NaN	NaN	NaN	16.6747
A0A6N4CSK9	Diguanylate phosphodiesterase	ASJ32_19830	OTHER	CytoplasmicMembrane	T	Putative diguanylate phosphodiesterase	Chromosome	NaN	NaN	NaN	NaN	NaN	NaN	NaN	NaN	NaN	NaN	NaN	NaN	NaN	NaN	NaN	NaN	23.2283	NaN	22.1246	22.3547	22.6386	22.9	22.5661	21.7239	22.4428	22.679	22.1891	21.9975	21.5023	22.5039	21.5121	22.9733	NaN	NaN	NaN	NaN	NaN	NaN	NaN	NaN	NaN	NaN
A0A6N4CSL1	dITP/XTP pyrophosphatase (EC 3.6.1.66) (Non-canonical purine NTP pyrophosphatase) (Non-standard purine NTP pyrophosphatase) (Nucleoside-triphosphate diphosphatase) (Nucleoside-triphosphate pyrophosphatase) (NTPase)	rdgB ASJ32_19745 GO994_04085	OTHER	Cytoplasmic	F	Pyrophosphatase that catalyzes the hydrolysis of nucleoside triphosphates to their monophosphate derivatives, with a high preference for the non-canonical purine nucleotides XTP (xanthosine triphosphate), dITP (deoxyinosine triphosphate) and ITP. Seems to function as a house-cleaning enzyme that removes non-canonical purine nucleotides from the nucleotide pool, thus preventing their incorporation…	Chromosome	25.1085	24.8431	23.8751	24.57	25.6386	25.3432	25.1146	25.5199	25.0563	25.9561	23.8202	25.8811	24.9226	24.55	23.0416	25.4396	NaN	NaN	NaN	NaN	NaN	NaN	NaN	NaN	NaN	NaN	NaN	NaN	NaN	NaN	NaN	NaN	NaN	NaN	NaN	NaN	NaN	NaN	NaN	NaN	NaN	NaN
A0A6N4CSL2	Uncharacterized protein	ASJ32_19930	OTHER	CytoplasmicMembrane	-	-	Chromosome	NaN	NaN	NaN	NaN	NaN	NaN	NaN	NaN	NaN	NaN	NaN	NaN	NaN	NaN	NaN	NaN	24.4685	NaN	23.4546	25.9868	25.4005	25.2627	24.1241	25.8333	24.8834	25.3329	25.372	25.4644	23.6183	24.4007	24.1926	25.0799	NaN	NaN	NaN	NaN	NaN	NaN	NaN	NaN	NaN	NaN
A0A6N4CSL4	30S ribosomal protein S13	rpsM ASJ32_11005 GO994_01255	OTHER	Cytoplasmic	J	Located at the top of the head of the 30S subunit, it contacts several helices of the 16S rRNA. In the 70S ribosome it contacts the 23S rRNA (bridge B1a) and protein L5 of the 50S subunit (bridge B1b), connecting the 2 subunits	Chromosome	31.099	31.2569	31.4959	31.6321	30.0873	29.4337	30.1193	30.8095	31.8492	31.0022	32.4678	31.7405	31.0058	31.7723	32.3577	31.0979	27.761	27.1648	28.3703	26.9067	28.9666	28.4735	28.0567	27.7155	28.9387	27.8909	28.2879	26.5285	27.0919	27.4898	23.7623	27.0632	NaN	NaN	NaN	NaN	NaN	NaN	NaN	NaN	NaN	16.8715
A0A6N4CSL5	DNA-directed RNA polymerase subunit delta	ASJ32_15885	SP(Sec/SPI)	Unknown	S	S-adenosyl-l-methionine hydroxide adenosyltransferase	Chromosome	26.3243	26.8075	26.2329	25.4734	27.0366	26.7682	26.9884	26.467	25.2522	25.3869	24.2173	24.8776	26.6029	26.2665	25.1687	25.6723	24.0639	NaN	23.9118	22.9305	25.0566	24.8265	25.0704	24.1605	23.8864	24.712	23.8528	24.3329	24.8007	24.4081	24.3217	23.837	NaN	NaN	NaN	NaN	NaN	NaN	NaN	NaN	NaN	NaN
A0A6N4CSL6	2-amino-4-hydroxy-6-hydroxymethyldihydropteridine pyrophosphokinase (EC 2.7.6.3) (6-hydroxymethyl-7,8-dihydropterin pyrophosphokinase)	folK ASJ32_18600 GO994_17800	OTHER	Cytoplasmic	H	7,8-dihydro-6-hydroxymethylpterin-pyrophosphokinase (HPPK)	Chromosome	22.7176	NaN	21.59	22.4818	22.3451	22.8338	23.6866	NaN	22.8696	23.6594	NaN	23.6091	NaN	20.837	NaN	21.3556	23.2591	NaN	22.4698	23.5203	23.4871	23.334	23.6807	23.5979	22.7842	23.1793	22.3342	23.4232	23.3641	22.2386	NaN	23.2621	NaN	NaN	NaN	NaN	NaN	NaN	NaN	NaN	NaN	NaN
A0A6N4CSL9	4-hydroxy-tetrahydrodipicolinate reductase (HTPA reductase) (EC 1.17.1.8)	dapB ASJ32_19545 GO994_08040	OTHER	Cytoplasmic	E	Catalyzes the conversion of 4-hydroxy- tetrahydrodipicolinate (HTPA) to tetrahydrodipicolinate	Chromosome	25.6638	25.1389	25.81	25.4706	26.2887	26.6189	26.6559	26.7173	25.0684	25.0246	24.0381	25.1561	25.6976	26.1165	24.7551	25.8109	25.3701	25.4129	25.4851	25.0232	26.3321	26.2814	26.7321	26.7966	24.5522	25.2921	24.2291	24.8433	25.5234	25.1165	23.856	25.6381	NaN	NaN	NaN	NaN	NaN	NaN	NaN	NaN	NaN	NaN
A0A6N4CSM0	Diaminopimelate epimerase (DAP epimerase) (EC 5.1.1.7) (PLP-independent amino acid racemase)	dapF ASJ32_05185 GO994_19270	OTHER	Cytoplasmic	E	Catalyzes the stereoinversion of LL-2,6- diaminoheptanedioate (L,L-DAP) to meso-diaminoheptanedioate (meso- DAP), a precursor of L-lysine and an essential component of the bacterial peptidoglycan	Chromosome	24.1351	24.7088	24.5377	23.4609	23.9217	23.9516	24.8141	24.241	24.4201	22.592	24.7822	22.9872	23.8981	24.2546	24.9064	23.3104	24.7715	22.1026	25.2525	23.9083	25.8525	25.3711	25.2325	24.5376	25.2924	24.5612	24.4897	23.6913	25.5531	25.2429	23.8962	23.8571	NaN	NaN	NaN	NaN	NaN	NaN	NaN	NaN	NaN	NaN
A0A6N4CSM1	Uncharacterized protein	ASJ32_19710 GO994_04050	SP(Sec/SPI)	Unknown	C	electron transfer activity	Chromosome	25.5308	25.6229	25.5879	25.7979	23.3217	22.9778	23.9213	22.9096	25.6107	25.5257	26.649	24.1378	25.4584	26.3654	26.2965	25.2618	NaN	NaN	NaN	NaN	NaN	NaN	NaN	NaN	NaN	NaN	NaN	NaN	NaN	NaN	NaN	NaN	NaN	NaN	NaN	NaN	NaN	NaN	NaN	NaN	NaN	NaN
A0A6N4CSM2	Haloacid dehalogenase	ASJ32_18295	OTHER	Unknown	S	Sucrose-6F-phosphate phosphohydrolase	Chromosome	NaN	NaN	NaN	NaN	NaN	NaN	NaN	NaN	NaN	NaN	NaN	NaN	NaN	NaN	NaN	NaN	21.692	NaN	NaN	21.4382	20.8622	21.4404	21.6483	22.1667	NaN	NaN	NaN	NaN	21.4148	21.4577	21.588	NaN	NaN	NaN	NaN	NaN	NaN	NaN	NaN	NaN	NaN	NaN
A0A6N4CSM4	Aspartate racemase	ASJ32_18230	OTHER	Cytoplasmic	M	Asp/Glu/Hydantoin racemase	Chromosome	NaN	NaN	NaN	NaN	NaN	NaN	NaN	NaN	NaN	NaN	NaN	NaN	NaN	NaN	NaN	NaN	24.9649	NaN	24.767	23.9423	25.775	25.8608	25.6449	24.6371	23.9978	23.7114	23.8552	24.7076	24.9487	24.3516	26.0702	25.1973	NaN	NaN	NaN	NaN	NaN	NaN	NaN	NaN	NaN	NaN
A0A6N4CSM6	Ubiquinone/menaquinone biosynthesis C-methyltransferase UbiE (EC 2.1.1.163) (EC 2.1.1.201) (2-methoxy-6-polyprenyl-1,4-benzoquinol methylase) (Demethylmenaquinone methyltransferase)	ubiE ASJ32_15240 GO994_21930	OTHER	Cytoplasmic	H	Methyltransferase required for the conversion of demethylmenaquinol (DMKH2) to menaquinol (MKH2) and the conversion of 2-polyprenyl-6-methoxy-1,4-benzoquinol (DDMQH2) to 2- polyprenyl-3-methyl-6-methoxy-1,4-benzoquinol (DMQH2)	Chromosome	23.2785	23.001	23.5109	23.9623	22.9416	22.8179	22.3754	22.751	22.9141	22.6576	23.9847	22.9347	23.725	23.2549	24.5264	22.0458	26.9876	26.0501	26.9898	27.0719	27.3253	26.6369	26.5022	26.3187	26.9669	26.8147	27.7459	26.604	26.6546	26.7021	27.5987	26.805	NaN	NaN	17.3068	18.3913	17.1382	NaN	NaN	NaN	NaN	NaN
A0A6N4CSM7	Uncharacterized protein	ASJ32_19525	LIPO(Sec/SPII)	CytoplasmicMembrane	S	Lipoprotein	Chromosome	NaN	NaN	NaN	NaN	NaN	NaN	NaN	NaN	NaN	NaN	NaN	NaN	NaN	NaN	NaN	NaN	28.623	29.3929	28.1486	29.3619	28.853	28.4748	27.8977	28.6507	28.2148	28.3462	28.2103	28.8359	28.3746	28.5837	27.8086	29.1759	NaN	NaN	NaN	NaN	17.9796	NaN	18.8864	NaN	NaN	NaN
A0A6N4CSN0	2OG-Fe(II) oxygenase (Isopenicillin N synthase family oxygenase)	ASJ32_18285 GO994_03445	OTHER	Cytoplasmic	C	Belongs to the iron ascorbate-dependent oxidoreductase family	Chromosome	23.6202	23.5588	22.0048	23.5194	24.1531	24.2784	24.5536	22.987	24.5723	24.4369	22.6821	24.6056	23.8474	23.2661	23.7303	23.7941	23.9819	26.2586	23.3499	23.8948	23.6683	23.7219	23.6277	22.7885	23.5637	24.3934	21.7977	24.3278	23.7475	23.8033	25.0574	23.4519	NaN	NaN	NaN	NaN	NaN	NaN	NaN	NaN	NaN	NaN
A0A6N4CSN1	Biotin_lipoyl_2 domain-containing protein	ASJ32_05235	LIPO(Sec/SPII)	Unknown	M	Biotin-lipoyl like	Chromosome	NaN	NaN	NaN	NaN	NaN	NaN	NaN	NaN	NaN	NaN	NaN	NaN	NaN	NaN	NaN	NaN	22.0478	NaN	21.4069	22.9951	21.5799	22.0702	21.6325	22.4248	21.5638	NaN	22.2391	21.7934	21.3345	22.2395	22.2716	22.2835	NaN	NaN	NaN	NaN	NaN	NaN	NaN	NaN	NaN	NaN
A0A6N4CSN3	GNAT family N-acetyltransferase (Ribosomal-protein-L7/L12-serine acetyltransferase)	ASJ32_19770 GO994_04115	OTHER	Cytoplasmic	J	Acetyltransferase (GNAT) domain	Chromosome	22.7252	23.5118	23.2839	24.1785	24.0568	25.1728	24.7875	25.3018	22.5767	23.393	NaN	NaN	22.9568	NaN	NaN	24.8334	NaN	NaN	NaN	NaN	NaN	21.5679	22.1018	NaN	NaN	NaN	NaN	NaN	NaN	NaN	NaN	NaN	NaN	NaN	NaN	NaN	NaN	NaN	NaN	NaN	NaN	NaN
A0A6N4CSN7	Phospho-2-dehydro-3-deoxyheptonate aldolase (EC 2.5.1.54)	ASJ32_19580	OTHER	Cytoplasmic	E	Stereospecific condensation of phosphoenolpyruvate (PEP) and D-erythrose-4-phosphate (E4P) giving rise to 3-deoxy-D- arabino-heptulosonate-7-phosphate (DAHP)	Chromosome	24.5582	23.2265	21.8493	24.3662	25.6244	24.5064	24.8964	24.2982	23.2835	24.1276	21.4413	23.4694	24.0848	23.0389	21.1386	24.3835	25.2271	25.0172	24.0441	25.0906	25.2099	25.2046	26.0029	26.4503	24.6489	25.611	24.1898	25.2883	25.1727	24.7055	24.3877	26.0514	NaN	NaN	NaN	NaN	NaN	NaN	NaN	NaN	NaN	NaN
A0A6N4CSN9	DUF4401 domain-containing protein	ASJ32_19650 GO994_07925	OTHER	CytoplasmicMembrane	S	Domain of unknown function (DUF4401)	Chromosome	NaN	NaN	NaN	NaN	NaN	NaN	NaN	NaN	NaN	NaN	NaN	NaN	NaN	NaN	NaN	NaN	NaN	NaN	23.6533	25.3395	24.1828	22.4319	23.2686	24.999	24.126	23.5556	24.7007	23.1097	NaN	NaN	24.2715	23.7325	NaN	NaN	NaN	NaN	NaN	NaN	NaN	NaN	NaN	20.2918
A0A6N4CSP0	Molybdopterin-binding oxidoreductase	ASJ32_19825	SP(Sec/SPI)	Unknown	S	Protein conserved in bacteria	Chromosome	NaN	NaN	NaN	NaN	NaN	NaN	NaN	NaN	NaN	NaN	NaN	NaN	NaN	NaN	NaN	NaN	NaN	NaN	NaN	NaN	NaN	NaN	NaN	NaN	NaN	NaN	NaN	NaN	NaN	NaN	NaN	NaN	NaN	NaN	NaN	NaN	NaN	NaN	NaN	NaN	NaN	NaN
A0A6N4CSP4	NADH-quinone oxidoreductase subunit F (EC 7.1.1.-)	ASJ32_09995	OTHER	Cytoplasmic	C	NDH-1 shuttles electrons from NADH, via FMN and iron- sulfur (Fe-S) centers, to quinones in the respiratory chain	Chromosome	21.8462	21.3336	22.4284	22.0016	NaN	NaN	NaN	NaN	21.413	NaN	NaN	21.1348	22.3265	21.0822	NaN	NaN	23.0271	NaN	22.9361	22.7337	NaN	21.259	22.9151	NaN	22.6726	22.803	NaN	22.1282	23.1538	23.5053	NaN	22.4103	NaN	NaN	NaN	NaN	NaN	NaN	NaN	NaN	NaN	NaN
A0A6N4CSP5	Ligand-gated channel protein	ASJ32_05285	LIPO(Sec/SPII)	OuterMembrane	H	TonB-dependent copper receptor	Chromosome	NaN	NaN	NaN	NaN	NaN	NaN	NaN	NaN	NaN	NaN	NaN	NaN	NaN	NaN	NaN	NaN	NaN	23.1927	NaN	NaN	22.9329	21.5695	NaN	24.5965	NaN	22.4602	NaN	23.3367	22.7543	23.0385	NaN	23.2919	20.424	20.8474	21.154	21.2678	20.1118	20.2548	19.9834	19.9562	20.287	21.108
A0A6N4CSQ0	Carbamoyl-phosphate synthase small chain (EC 6.3.5.5) (Carbamoyl-phosphate synthetase glutamine chain)	carA ASJ32_19540 GO994_08045	OTHER	Cytoplasmic	F	Carbamoyl-phosphate synthetase glutamine chain	Chromosome	26.9254	26.8839	27.5473	27.3315	26.2154	26.0583	26.4358	26.3826	26.8033	26.6192	26.7643	27.4178	27.4985	26.2442	27.15	27.6455	27.396	27.0379	27.1165	27.0509	27.2338	26.4189	27.1138	27.0086	26.9593	27.3722	26.4759	26.9488	27.4946	27.4921	26.9734	27.2201	21.001	20.6469	20.6109	19.2306	18.2781	18.3104	NaN	20.0079	NaN	20.2582
A0A6N4CSQ1	Glutathione S-transferase	ASJ32_19350 GO994_13385	OTHER	Cytoplasmic	H	Glutathione S-transferase, N-terminal domain	Chromosome	NaN	NaN	NaN	NaN	NaN	NaN	NaN	NaN	NaN	NaN	NaN	NaN	NaN	NaN	NaN	NaN	22.7465	NaN	22.1176	23.2252	23.6209	24.0404	23.4149	23.0754	22.5443	22.1831	22.2256	22.5726	23.2254	22.3942	23.1046	22.6472	NaN	NaN	NaN	NaN	NaN	NaN	NaN	NaN	NaN	NaN
A0A6N4CSQ2	Ubiquinone biosynthesis accessory factor UbiK	ubiK ASJ32_15340 GO994_21830	OTHER	Unknown	S	Membrane fusogenic activity	Chromosome	23.7717	24.4901	26.2578	25.456	24.5342	23.9565	24.894	25.0439	25.1244	24.9653	25.7093	25.5946	25.0928	21.896	26.7713	25.3499	25.2344	26.0601	22.1576	25.2884	25.792	24.7958	23.9895	NaN	23.5226	26.0923	25.0414	25.1298	23.92	24.0272	NaN	25.7752	NaN	NaN	NaN	NaN	NaN	NaN	NaN	NaN	NaN	NaN
A0A6N4CSQ4	O-acetylhomoserine aminocarboxypropyltransferase (EC 2.5.1.49)	ASJ32_05345	OTHER	Cytoplasmic	E	Cys/Met metabolism PLP-dependent enzyme	Chromosome	26.62	26.7117	26.614	27.1987	27.6844	27.963	28.2537	27.9439	25.808	26.7768	25.4916	26.528	27.0667	26.3628	26.5866	27.2448	26.1874	27.2372	27.0268	26.4207	27.6029	28.001	27.355	27.4067	26.4175	25.3963	25.2902	25.5827	27.665	27.435	26.3089	25.198	21.9101	20.8673	21.276	21.6131	21.2488	22.1481	21.2968	22.6058	19.1843	20.5596
A0A6N4CSQ8	Dipeptidase (EC 3.4.-.-)	ASJ32_19970 GO994_13365	LIPO(Sec/SPII)	Unknown	E	Peptidase family C69	Chromosome	24.7769	24.767	25.085	24.8019	25.5563	25.7281	25.7928	25.6532	24.023	24.583	23.7069	24.2218	24.9621	25.0278	24.1021	25.1296	23.0773	22.4311	NaN	24.1395	22.4642	22.597	NaN	22.3373	23.3514	NaN	22.7439	NaN	23.7472	23.2103	22.7461	24.2327	NaN	NaN	NaN	NaN	NaN	NaN	NaN	NaN	NaN	NaN
A0A6N4CSR1	Dihydrofolate synthase/folylpolyglutamate synthase (EC 6.3.2.12) (Folylpoly-gamma-glutamate synthetase-dihydrofolate synthetase) (Folylpolyglutamate synthetase)	ASJ32_19420	OTHER	Cytoplasmic	H	Belongs to the folylpolyglutamate synthase family	Chromosome	NaN	22.4329	NaN	NaN	23.8553	24.0477	23.5877	22.509	22.4964	23.8284	NaN	23.3191	21.8316	NaN	NaN	22.7414	23.3615	NaN	23.2624	23.7094	22.9691	22.0725	24.2351	24.2107	22.4066	23.5833	23.3003	23.4863	23.3255	22.9232	23.2395	23.8194	NaN	NaN	NaN	NaN	NaN	NaN	NaN	NaN	NaN	NaN
A0A6N4CSR2	Leucine ABC transporter substrate-binding protein	ASJ32_15390	SP(Sec/SPI)	Periplasmic	E	Leucine ABC transporter subunit substrate-binding protein LivK	Chromosome	25.4522	25.52	26.1648	25.4188	26.6369	26.4954	27.1053	26.4169	24.6934	25.7179	24.9726	24.9987	24.9301	24.0357	23.7953	25.6641	21.4584	NaN	20.7777	21.6069	NaN	NaN	NaN	NaN	NaN	NaN	NaN	NaN	21.0667	NaN	NaN	21.1985	NaN	NaN	NaN	NaN	NaN	NaN	NaN	NaN	NaN	NaN
A0A6N4CSR4	6-carboxy-5,6,7,8-tetrahydropterin synthase (EC 4.1.2.50) (Queuosine biosynthesis protein QueD)	ASJ32_10100	OTHER	Cytoplasmic	H	6-pyruvoyl tetrahydropterin synthase	Chromosome	22.5823	22.645	22.528	21.9552	22.7259	21.4096	23.6241	23.273	22.4839	22.0676	21.1334	21.3194	21.7667	23.6073	NaN	22.0071	22.0427	NaN	22.7174	21.7942	21.8278	22.777	21.826	22.2743	23.6534	23.7923	23.0871	22.8592	23.5392	23.1069	NaN	22.3665	NaN	NaN	NaN	NaN	NaN	NaN	NaN	NaN	NaN	NaN
A0A6N4CSR7	Esterase (Hotdog fold thioesterase)	ASJ32_20025 GO994_13310	OTHER	Unknown	Q	Thioesterase superfamily	Chromosome	22.4867	22.735	NaN	NaN	21.9524	22.9741	22.5862	22.4708	21.9585	22.688	NaN	21.7615	22.1632	23.8305	22.4411	22.4126	NaN	NaN	20.3126	NaN	NaN	20.9141	NaN	NaN	NaN	NaN	NaN	NaN	22.0887	NaN	NaN	NaN	NaN	NaN	NaN	NaN	NaN	NaN	NaN	NaN	NaN	NaN
A0A6N4CSR8	IU_nuc_hydro domain-containing protein	ASJ32_17945	OTHER	CytoplasmicMembrane	F	Inosine-uridine preferring nucleoside hydrolase	Chromosome	22.3777	22.2916	22.8626	22.7475	23.1838	21.7063	22.4419	23.0353	NaN	NaN	NaN	NaN	22.517	NaN	22.3327	22.054	NaN	NaN	NaN	NaN	NaN	NaN	NaN	NaN	NaN	NaN	NaN	NaN	NaN	NaN	NaN	NaN	NaN	NaN	NaN	NaN	NaN	NaN	NaN	NaN	NaN	NaN
A0A6N4CSR9	Dipeptide/tripeptide permease	ASJ32_20775	OTHER	CytoplasmicMembrane	U	Proton-dependent permease that transports di- and tripeptides	Chromosome	NaN	NaN	NaN	NaN	NaN	NaN	NaN	NaN	NaN	NaN	NaN	NaN	NaN	NaN	NaN	NaN	22.1014	NaN	22.2366	23.9175	NaN	NaN	NaN	22.3909	20.8367	NaN	22.856	23.1919	22.6411	22.3429	22.8162	23.3785	NaN	NaN	NaN	NaN	NaN	NaN	NaN	NaN	NaN	NaN
A0A6N4CSS1	Isochorismatase	ASJ32_19470	OTHER	Unknown	Q	Isochorismatase family	Chromosome	22.9328	22.3468	NaN	22.3773	23.3019	24.1766	23.36	23.3354	NaN	NaN	NaN	NaN	22.1735	NaN	NaN	NaN	22.1636	NaN	22.0177	NaN	22.1803	23.5491	23.7275	23.5457	NaN	NaN	NaN	22.775	22.7086	22.7153	NaN	22.1591	NaN	NaN	NaN	NaN	NaN	NaN	NaN	NaN	NaN	NaN
A0A6N4CSS3	Gamma-glutamyltransferase	ASJ32_19165	LIPO(Sec/SPII)	Periplasmic	M	Gamma-glutamyltranspeptidase	Chromosome	22.9004	23.2239	NaN	23.0507	23.4983	23.2273	23.3785	23.8918	NaN	NaN	NaN	NaN	23.1575	NaN	NaN	22.6286	25.3039	25.1143	24.7905	25.5969	26.502	26.6206	26.8701	26.7231	23.7451	24.3033	24.0578	24.567	24.864	24.6941	25.7088	25.9413	NaN	NaN	NaN	NaN	17.4737	NaN	18.1849	NaN	NaN	NaN
A0A6N4CSS4	Peptide ABC transporter permease	ASJ32_10155	OTHER	CytoplasmicMembrane	EP	N-terminal TM domain of oligopeptide transport permease C	Chromosome	NaN	NaN	NaN	NaN	NaN	NaN	NaN	NaN	NaN	NaN	NaN	NaN	NaN	NaN	NaN	NaN	24.736	21.8963	23.8034	24.5304	25.577	24.3001	24.1128	23.9282	24.0166	NaN	23.9022	22.8721	23.3009	23.6465	24.35	24.4637	NaN	NaN	NaN	NaN	NaN	NaN	NaN	NaN	NaN	NaN
A0A6N4CSS5	Uridine phosphorylase (EC 2.4.2.3)	ASJ32_17935 GO994_07380	OTHER	Cytoplasmic	F	Catalyzes the reversible phosphorylytic cleavage of uridine and deoxyuridine to uracil and ribose- or deoxyribose-1- phosphate. The produced molecules are then utilized as carbon and energy sources or in the rescue of pyrimidine bases for nucleotide synthesis	Chromosome	24.1658	24.614	24.1582	23.2825	24.1529	25.3131	24.3978	24.796	23.6755	23.4262	22.1147	21.8168	24.2926	24.9223	22.9955	23.9833	23.8202	23.0516	23.9982	22.4531	25.131	24.0073	23.4672	23.2911	22.3473	23.6403	NaN	21.6519	23.4854	22.8073	20.8694	22.6426	NaN	NaN	NaN	NaN	NaN	NaN	NaN	NaN	NaN	NaN
A0A6N4CSS6	4-hydroxyphenylpyruvate dioxygenase	ASJ32_19370	OTHER	Cytoplasmic	C	4-hydroxyphenylpyruvate dioxygenase	Chromosome	20.3273	21.5102	NaN	NaN	21.6776	20.9471	22.5183	NaN	NaN	NaN	NaN	NaN	20.2984	NaN	NaN	NaN	22.2017	NaN	NaN	22.129	22.4317	22.5218	22.7386	22.5789	NaN	21.492	21.8688	21.4069	NaN	NaN	NaN	21.1939	NaN	NaN	NaN	NaN	NaN	NaN	NaN	NaN	NaN	NaN
A0A6N4CSS7	Ion-translocating oxidoreductase complex subunit E (EC 7.-.-.-) (Rnf electron transport complex subunit E)	rnfE ASJ32_20075	OTHER	CytoplasmicMembrane	C	Part of a membrane complex involved in electron transport	Chromosome	NaN	NaN	NaN	NaN	NaN	NaN	NaN	NaN	NaN	NaN	NaN	NaN	NaN	NaN	NaN	NaN	23.7168	23.6448	24.0296	24.397	23.6199	23.3584	22.7992	24.5808	23.9952	23.5791	25.0007	23.4526	23.6594	23.7804	23.2807	24.2522	NaN	NaN	NaN	NaN	NaN	NaN	NaN	NaN	NaN	NaN
A0A6N4CST0	2-succinylbenzoate-CoA ligase	ASJ32_05450	OTHER	CytoplasmicMembrane	IQ	AMP-binding enzyme	Chromosome	NaN	NaN	NaN	NaN	20.7421	NaN	20.6688	NaN	NaN	NaN	NaN	NaN	NaN	NaN	NaN	NaN	21.0931	22.7995	NaN	NaN	21.8792	NaN	22.4797	23.4791	21.4479	22.1344	NaN	NaN	NaN	NaN	23.2835	22.3165	NaN	NaN	NaN	NaN	NaN	NaN	NaN	NaN	NaN	NaN
A0A6N4CST2	OmpA-like domain-containing protein	ASJ32_15490	LIPO(Sec/SPII)	CytoplasmicMembrane	M	Belongs to the ompA family	Chromosome	22.579	23.1212	23.661	23.6111	22.9121	22.7603	22.3804	22.1905	22.1069	23.2634	24.0236	23.4282	22.0926	22.5025	24.652	23.4554	28.6563	28.4874	28.4592	29.6923	28.5721	28.4891	28.1176	28.4642	27.9005	28.3583	28.5434	28.6488	27.8091	28.1613	29.6155	28.9448	24.1384	25.0141	25.179	25.1693	25.1439	24.5092	23.8516	24.914	24.4536	24.6929
A0A6N4CST3	Phosphoenolpyruvate-protein phosphotransferase (EC 2.7.3.9) (Phosphotransferase system, enzyme I)	ASJ32_19215	OTHER	Cytoplasmic	G	General (non sugar-specific) component of the phosphoenolpyruvate-dependent sugar phosphotransferase system (sugar PTS). This major carbohydrate active-transport system catalyzes the phosphorylation of incoming sugar substrates concomitantly with their translocation across the cell membrane. Enzyme I transfers the phosphoryl group from phosphoenolpyruvate (PEP) to the phosphoryl carrier protein (…	Chromosome	28.609	29.0454	28.4318	28.2856	28.8877	28.9453	28.7569	28.6711	28.6909	28.4599	28.06	28.187	28.4739	29.3135	27.3839	28.0678	26.2881	26.4447	27.3499	25.6198	26.1455	26.8834	26.2754	27.1299	26.8406	26.8927	26.7767	26.5285	26.9522	26.9442	26.5001	26.5327	16.9623	17.5887	18.3376	18.2463	17.2815	17.5575	NaN	18.4901	18.227	18.5384
A0A6N4CST4	Efflux RND transporter periplasmic adaptor subunit (Hemolysin D)	ASJ32_10210 GO994_08270	OTHER	CytoplasmicMembrane	V	secretion protein HlyD family	Chromosome	NaN	NaN	NaN	NaN	NaN	NaN	NaN	NaN	NaN	NaN	NaN	NaN	NaN	NaN	NaN	NaN	25.4618	24.3353	26.107	26.1967	26.2543	25.21	25.4059	25.2031	27.3797	24.9692	27.4077	26.0532	25.8776	25.6061	26.0354	25.6369	NaN	NaN	NaN	NaN	18.4134	NaN	NaN	NaN	NaN	NaN
A0A6N4CST5	K(+)/H(+) antiporter NhaP2 (Potassium/proton antiporter NhaP2)	cvrA nhaP2 ycgO ASJ32_17990 GO994_07450	OTHER	CytoplasmicMembrane	P	K( ) H( ) antiporter that extrudes potassium in exchange for external protons and maintains the internal concentration of potassium under toxic levels	Chromosome	NaN	NaN	NaN	NaN	NaN	NaN	NaN	NaN	NaN	NaN	NaN	NaN	NaN	NaN	NaN	NaN	24.7143	24.9608	24.0541	24.6991	24.4389	24.4111	24.3873	24.0846	23.7585	24.3349	23.9984	24.7362	24.1969	24.9361	25.6488	24.9004	NaN	NaN	NaN	NaN	NaN	NaN	NaN	NaN	NaN	NaN
A0A6N4CST6	8-amino-7-oxononanoate synthase (AONS) (EC 2.3.1.47) (7-keto-8-amino-pelargonic acid synthase) (7-KAP synthase) (KAPA synthase) (8-amino-7-ketopelargonate synthase)	bioF ASJ32_18055	OTHER	Cytoplasmic	H	Catalyzes the decarboxylative condensation of pimeloyl- acyl-carrier protein and L-alanine to produce 8-amino-7- oxononanoate (AON), acyl-carrier protein , and carbon dioxide	Chromosome	NaN	NaN	NaN	NaN	NaN	NaN	NaN	NaN	NaN	NaN	NaN	NaN	NaN	NaN	NaN	NaN	23.8342	22.0903	22.8821	23.6706	22.1328	20.7378	21.8487	22.0407	21.6764	22.7104	21.7287	23.2095	24.4774	23.4153	22.5219	24.899	NaN	NaN	NaN	NaN	NaN	NaN	NaN	NaN	NaN	NaN
A0A6N4CST7	Pilus assembly protein FimV	ASJ32_19435 GO994_13480	SP(Sec/SPI)	Unknown	NU	COG3170 Tfp pilus assembly protein FimV	Chromosome	22.7157	21.5239	22.8427	24.7704	23.1939	21.8514	20.7587	22.716	21.818	21.6313	22.9103	22.9672	21.9289	22.7586	23.1512	23.669	26.3646	27.7172	25.9321	27.893	26.4544	26.2113	26.4545	27.2853	25.982	26.1468	26.4218	26.9054	26.0864	26.2365	26.7603	26.9699	NaN	18.694	19.1714	19.0331	19.6137	NaN	21.1889	19.18	19.5286	NaN
A0A6N4CST8	dTDP-4-dehydrorhamnose reductase (EC 1.1.1.133)	rfbD ASJ32_19865 GO994_15780	OTHER	Cytoplasmic	M	Catalyzes the reduction of dTDP-6-deoxy-L-lyxo-4- hexulose to yield dTDP-L-rhamnose	Chromosome	25.6078	26.1987	25.5004	25.8538	26.1103	26.4887	26.6506	26.5194	25.7987	26.8519	25.5327	26.9824	26.083	24.0589	24.0986	26.1437	25.5936	26.6091	24.4676	25.1063	26.2128	26.0925	26.2309	25.6633	24.7666	26.2132	24.695	25.4417	25.1652	24.8618	23.9574	24.6421	NaN	NaN	NaN	NaN	NaN	NaN	NaN	NaN	NaN	NaN
A0A6N4CST9	ABC transporter ATP-binding protein	ASJ32_20665 GO994_03630	OTHER	Cytoplasmic	S	of ABC transporters with duplicated ATPase domains	Chromosome	24.4646	22.0596	NaN	22.9708	23.5002	21.5514	23.2366	NaN	23.3863	21.5425	21.2758	22.288	23.5847	21.835	NaN	23.1613	25.1993	24.9204	25.0923	24.9934	25.2951	24.9013	25.3262	24.8575	25.4506	25.7031	24.6368	25.7867	25.1343	24.3917	24.6696	25.0035	NaN	NaN	NaN	NaN	NaN	NaN	NaN	NaN	NaN	NaN
A0A6N4CSU2	Xaa-Pro dipeptidase (X-Pro dipeptidase) (EC 3.4.13.9) (Imidodipeptidase) (Proline dipeptidase) (Prolidase)	pepQ ASJ32_15540	OTHER	Cytoplasmic	E	Splits dipeptides with a prolyl residue in the C- terminal position	Chromosome	21.875	22.5136	NaN	23.0516	23.451	23.3284	23.3366	23.1118	21.9102	21.8155	NaN	NaN	22.888	23.0256	NaN	21.7317	24.6058	23.3393	24.716	23.8715	25.9069	25.6463	25.3975	24.4183	24.5774	24.5395	23.2531	24.0772	24.6806	24.8651	22.0537	23.8116	NaN	NaN	NaN	NaN	NaN	NaN	NaN	NaN	NaN	NaN
A0A6N4CSU3	Transposase	ASJ32_10265	OTHER	Unknown	L	Transposase	Chromosome	21.0723	21.1186	21.707	21.9526	21.9119	21.2379	22.4626	NaN	20.4236	22.2294	NaN	21.5231	NaN	NaN	NaN	NaN	23.0984	NaN	NaN	NaN	24.155	NaN	25.3269	25.9137	NaN	NaN	NaN	NaN	NaN	NaN	NaN	24.0935	NaN	NaN	NaN	NaN	NaN	NaN	NaN	NaN	NaN	NaN
A0A6N4CSU4	Amino acid ABC transporter permease (Cysteine/glutathione ABC transporter ATP-binding protein/permease CydC)	cydC ASJ32_19265 GO994_16500	OTHER	CytoplasmicMembrane	V	ABC transporter	Chromosome	NaN	NaN	NaN	NaN	NaN	NaN	NaN	NaN	NaN	NaN	NaN	NaN	NaN	NaN	NaN	NaN	23.9471	NaN	23.7835	23.968	24.2834	23.5411	22.669	22.7976	24.0266	23.7067	24.5441	23.6728	23.7611	24.324	24.3897	23.479	NaN	NaN	NaN	NaN	NaN	NaN	NaN	NaN	NaN	NaN
A0A6N4CSU7	Adenosylmethionine-8-amino-7-oxononanoate aminotransferase (EC 2.6.1.62) (7,8-diamino-pelargonic acid aminotransferase) (DAPA AT) (DAPA aminotransferase) (7,8-diaminononanoate synthase) (DANS) (Diaminopelargonic acid synthase)	bioA ASJ32_18045	OTHER	Cytoplasmic	H	Catalyzes the transfer of the alpha-amino group from S- adenosyl-L-methionine (SAM) to 7-keto-8-aminopelargonic acid (KAPA) to form 7,8-diaminopelargonic acid (DAPA). It is the only animotransferase known to utilize SAM as an amino donor	Chromosome	22.4798	22.7292	NaN	NaN	22.8226	NaN	21.6823	NaN	21.5349	NaN	NaN	NaN	22.7143	23.1751	NaN	NaN	21.1978	NaN	21.8358	NaN	NaN	NaN	NaN	NaN	NaN	NaN	NaN	NaN	NaN	21.3584	NaN	NaN	NaN	NaN	NaN	NaN	NaN	NaN	NaN	NaN	NaN	NaN
A0A6N4CSU8	Glycosyl transferase family 2	ASJ32_19920	OTHER	Cytoplasmic	M	COG0438 Glycosyltransferase	Chromosome	20.6446	NaN	NaN	NaN	21.4219	NaN	NaN	NaN	21.4136	NaN	NaN	NaN	21.7785	22.2566	NaN	NaN	26.3334	21.9475	26.3711	25.1669	25.7277	24.9742	24.2502	24.0595	27.1506	26.3627	27.5544	26.5045	26.4625	26.1868	25.4399	25.9824	NaN	18.0447	18.2475	NaN	17.0273	NaN	NaN	NaN	NaN	18.481
A0A6N4CSV0	tRNA (N6-threonylcarbamoyladenosine(37)-N6)-methyltransferase TrmO (tRNA-Thr(GGU) m(6)t(6)A37 methyltransferase TsaA)	tsaA ASJ32_19245 GO994_16520	OTHER	Cytoplasmic	S	Uncharacterised protein family UPF0066	Chromosome	23.7721	23.303	23.9671	24.2153	23.5947	24.2455	23.6711	23.8216	23.8892	25.3171	24.2926	25.123	23.4238	22.061	23.9662	24.1501	23.0945	24.9171	23.2337	NaN	22.3305	23.8514	22.855	23.7061	22.7234	24.399	22.6903	23.9583	24.6458	24.7822	24.6436	23.0083	NaN	NaN	NaN	NaN	NaN	NaN	NaN	NaN	NaN	NaN
A0A6N4CSV3	4-hydroxy-4-methyl-2-oxoglutarate aldolase (HMG aldolase) (EC 4.1.1.112) (EC 4.1.3.17) (Oxaloacetate decarboxylase)	ASJ32_19295 GO994_16470	OTHER	Cytoplasmic	H	Catalyzes the aldol cleavage of 4-hydroxy-4-methyl-2- oxoglutarate (HMG) into 2 molecules of pyruvate. Also contains a secondary oxaloacetate (OAA) decarboxylase activity due to the common pyruvate enolate transition state formed following C-C bond cleavage in the retro-aldol and decarboxylation reactions	Chromosome	NaN	NaN	NaN	NaN	21.9889	22.6963	22.4011	22.6543	NaN	NaN	NaN	NaN	NaN	NaN	NaN	NaN	NaN	NaN	NaN	NaN	NaN	NaN	NaN	NaN	NaN	NaN	NaN	NaN	NaN	NaN	NaN	NaN	NaN	NaN	NaN	NaN	NaN	NaN	NaN	NaN	NaN	NaN
A0A6N4CSV5	ABC transporter (Type I secretion system permease/ATPase)	ASJ32_10315 GO994_08160	OTHER	CytoplasmicMembrane	V	COG2274 ABC-type bacteriocin lantibiotic exporters, contain an N-terminal double-glycine peptidase domain	Chromosome	NaN	NaN	NaN	NaN	NaN	NaN	NaN	NaN	NaN	NaN	NaN	NaN	NaN	NaN	NaN	NaN	25.6826	25.8603	25.7496	26.3145	25.9395	25.3781	25.492	25.2851	25.6616	25.9546	26.206	26.3932	25.4413	25.7635	26.4241	25.7027	NaN	NaN	NaN	NaN	NaN	NaN	NaN	NaN	NaN	NaN
A0A6N4CSV6	Hemolysin	ASJ32_18165	SP(Sec/SPI)	Extracellular	S	hemolysis in other organism	Chromosome	NaN	NaN	NaN	NaN	24.1663	24.6727	24.4094	24.1362	NaN	NaN	NaN	NaN	24.6964	NaN	NaN	NaN	23.5427	21.2807	22.4695	24.2568	25.2441	25.2204	25.4299	25.1057	21.6394	20.5579	22.891	23.3844	23.2392	23.7171	24.3634	24.1319	NaN	NaN	NaN	NaN	NaN	NaN	NaN	NaN	NaN	NaN
A0A6N4CSV8	Isocitrate dehydrogenase kinase/phosphatase (IDH kinase/phosphatase) (IDHK/P) (EC 2.7.11.5) (EC 3.1.3.-)	aceK ASJ32_19310	OTHER	Cytoplasmic	F	Bifunctional enzyme which can phosphorylate or dephosphorylate isocitrate dehydrogenase (IDH) on a specific serine residue. This is a regulatory mechanism which enables bacteria to bypass the Krebs cycle via the glyoxylate shunt in response to the source of carbon. When bacteria are grown on glucose, IDH is fully active and unphosphorylated, but when grown on acetate or ethanol, the activity of I…	Chromosome	NaN	NaN	NaN	NaN	NaN	NaN	NaN	NaN	NaN	NaN	NaN	NaN	NaN	NaN	NaN	NaN	21.0301	NaN	21.5451	NaN	24.2768	24.4959	24.1947	23.2285	20.2586	NaN	NaN	NaN	20.9917	21.2765	NaN	20.8742	NaN	NaN	NaN	NaN	NaN	NaN	NaN	NaN	NaN	NaN
A0A6N4CSW4	PTS glucose transporter subunit IIA	ASJ32_19210	OTHER	Cytoplasmic	G	Pts system	Chromosome	28.5645	28.5212	29.2304	27.8224	28.682	29.3704	29.3991	28.3469	27.8053	29.508	28.1496	27.8428	27.835	28.0338	28.0766	28.0177	26.4263	27.1441	27.2951	26.2262	25.7688	26.576	26.5624	26.9766	26.6216	26.7313	27.2608	26.9847	27.3894	26.9371	26.5015	26.674	NaN	17.2062	18.5408	18.3732	NaN	NaN	NaN	NaN	NaN	18.3689
A0A6N4CSW6	RNA helicase	ASJ32_10370	OTHER	Cytoplasmic	L	Belongs to the DEAD box helicase family	Chromosome	25.7294	24.3745	25.9291	26.7538	25.1824	23.8017	25.1698	24.3042	25.0195	25.0614	26.8853	26.5223	26.0789	24.9539	25.8863	26.5492	29.0387	28.5827	28.8102	28.712	28.6496	28.2656	28.6656	27.9722	28.902	28.6363	28.5621	28.8453	28.6803	28.1354	27.433	28.5796	20.4451	21.9279	21.8732	20.9256	20.3981	19.2485	20.8609	20.256	21.856	21.8863
A0A6N4CSW9	HAD family hydrolase	ASJ32_05225	OTHER	Unknown	S	Sucrose-6F-phosphate phosphohydrolase	Chromosome	25.3467	25.6687	25.7396	25.2033	25.5149	25.3314	26.0342	25.6663	24.9901	25.783	25.1938	25.4817	24.5734	24.2703	24.3258	25.0291	22.8036	21.9118	22.9501	22.8829	24.0775	23.7764	22.8855	21.9012	23.2994	23.007	22.9195	23.3169	23.2568	22.3818	22.4414	21.8878	NaN	NaN	NaN	NaN	NaN	NaN	NaN	NaN	NaN	NaN
A0A6N4CSX0	Ketol-acid reductoisomerase (NADP(+)) (KARI) (EC 1.1.1.86) (Acetohydroxy-acid isomeroreductase) (AHIR) (Alpha-keto-beta-hydroxylacyl reductoisomerase)	ilvC ASJ32_18930	OTHER	Cytoplasmic	EH	Involved in the biosynthesis of branched-chain amino acids (BCAA). Catalyzes an alkyl-migration followed by a ketol- acid reduction of (S)-2-acetolactate (S2AL) to yield (R)-2,3- dihydroxy-isovalerate. In the isomerase reaction, S2AL is rearranged via a Mg-dependent methyl migration to produce 3- hydroxy-3-methyl-2-ketobutyrate (HMKB). In the reductase reaction, this 2-ketoacid undergoes a metal-…	Chromosome	30.7036	31.1884	30.8674	30.5936	29.9578	30.4569	30.2425	30.562	29.7929	29.331	29.0047	29.0693	30.7425	31.342	30.8065	30.64	30.5359	29.7717	30.8227	30.1009	30.3599	30.026	29.5833	29.628	29.8686	29.6224	29.4033	28.7019	30.7395	30.6547	29.756	29.1727	21.9632	21.0295	21.6594	21.3843	21.1377	18.7532	21.1037	20.0077	18.3867	20.7085
A0A6N4CSX1	Heat shock protein 15	hslR ASJ32_05650 GO994_20165	OTHER	Cytoplasmic	J	Belongs to the HSP15 family	Chromosome	22.0983	21.7547	22.873	23.6634	22.1275	22.2966	22.1049	23.0995	23.6823	22.5153	24.5339	24.2246	23.0412	22.9413	23.8114	23.554	NaN	NaN	NaN	NaN	NaN	NaN	NaN	NaN	NaN	NaN	NaN	NaN	NaN	NaN	NaN	NaN	NaN	NaN	NaN	NaN	NaN	NaN	NaN	NaN	NaN	NaN
A0A6N4CSX2	ADP-heptose--LPS heptosyltransferase (Lipopolysaccharide heptosyltransferase II)	waaF ASJ32_19005 GO994_00500	OTHER	Cytoplasmic	M	heptosyltransferase II	Chromosome	NaN	21.0772	NaN	22.6819	NaN	NaN	NaN	NaN	NaN	NaN	NaN	21.4333	21.5897	NaN	23.0002	21.3724	25.3406	24.1086	25.2372	25.5677	25.5244	24.9597	24.9029	24.759	25.3868	25.3417	25.2684	25.2581	25.2776	25.1031	25.8866	25.8495	NaN	NaN	NaN	NaN	NaN	NaN	NaN	NaN	NaN	NaN
A0A6N4CSX3	Exopolysaccharide biosynthesis protein	ASJ32_19260	LIPO(Sec/SPII)	OuterMembrane	S	RcsF lipoprotein	Chromosome	21.6485	NaN	NaN	22.0584	NaN	NaN	NaN	NaN	NaN	NaN	NaN	NaN	NaN	NaN	NaN	NaN	26.0478	25.5364	26.4054	26.6157	26.0675	25.2209	25.4763	25.4009	26.3967	26.0049	26.4297	26.1858	24.9847	25.4777	25.5406	25.6073	NaN	NaN	NaN	NaN	NaN	NaN	NaN	NaN	NaN	NaN
A0A6N4CSX4	Acetyltransferase (GNAT family N-acetyltransferase)	ASJ32_20600 GO994_16305	OTHER	Unknown	K	N-acetyltransferase	Chromosome	NaN	NaN	NaN	NaN	NaN	NaN	NaN	NaN	NaN	NaN	NaN	NaN	NaN	NaN	NaN	NaN	24.074	NaN	21.8231	23.1034	24.4459	23.1287	24.4045	23.4021	22.3391	21.6589	23.1914	22.2644	22.6945	22.4079	NaN	23.6595	NaN	NaN	NaN	NaN	NaN	NaN	NaN	NaN	NaN	NaN
A0A6N4CSX7	Uncharacterized protein	ASJ32_17560	SP(Sec/SPI)	Unknown	P	Protein of unknown function (DUF2796)	Chromosome	28.9248	28.4937	27.9615	28.1368	28.1654	27.8014	28.7733	27.5926	27.0822	27.7995	26.9688	27.3393	27.6843	27.5301	27.2143	27.4367	23.7992	NaN	23.5588	23.9091	21.6599	22.4613	23.5076	NaN	21.7643	NaN	23.6127	22.9045	23.4035	22.2403	23.3403	23.3429	NaN	NaN	19.2975	19.9175	NaN	NaN	NaN	NaN	NaN	NaN
A0A6N4CSX8	7,8-dihydro-8-oxoguanine-triphosphatase (8-oxo-dGTP diphosphatase MutT)	mutT ASJ32_15065 GO994_02415	OTHER	Cytoplasmic	L	Belongs to the Nudix hydrolase family	Chromosome	26.4042	25.626	NaN	NaN	27.2493	NaN	NaN	NaN	NaN	NaN	NaN	NaN	25.8519	NaN	NaN	NaN	NaN	NaN	NaN	NaN	NaN	NaN	NaN	NaN	NaN	NaN	NaN	NaN	NaN	NaN	NaN	NaN	NaN	NaN	NaN	NaN	NaN	NaN	NaN	NaN	NaN	NaN
A0A6N4CSX9	Formamidopyrimidine-DNA glycosylase (Fapy-DNA glycosylase) (EC 3.2.2.23) (DNA-(apurinic or apyrimidinic site) lyase MutM) (AP lyase MutM) (EC 4.2.99.18)	mutM fpg ASJ32_18980 GO994_00475	OTHER	Cytoplasmic	L	Involved in base excision repair of DNA damaged by oxidation or by mutagenic agents. Acts as DNA glycosylase that recognizes and removes damaged bases. Has a preference for oxidized purines, such as 7,8-dihydro-8-oxoguanine (8-oxoG). Has AP (apurinic apyrimidinic) lyase activity and introduces nicks in the DNA strand. Cleaves the DNA backbone by beta-delta elimination to generate a single-strand …	Chromosome	NaN	NaN	NaN	NaN	NaN	NaN	NaN	NaN	NaN	NaN	NaN	NaN	NaN	NaN	NaN	NaN	23.3873	23.6155	22.0383	24.3189	23.3393	22.4055	22.7832	22.4794	22.3519	23.2597	22.8498	23.8496	23.2416	23.1369	24.7898	23.9927	NaN	NaN	NaN	NaN	NaN	NaN	NaN	NaN	NaN	NaN
A0A6N4CSY0	Glycerol-3-phosphate acyltransferase (GPAT) (EC 2.3.1.15)	plsB ASJ32_19060 GO994_00565	OTHER	CytoplasmicMembrane	I	Belongs to the GPAT DAPAT family	Chromosome	NaN	NaN	NaN	NaN	NaN	NaN	NaN	NaN	NaN	NaN	NaN	NaN	NaN	NaN	NaN	NaN	26.4505	25.7027	26.4798	26.2131	26.2772	25.7521	26.0866	24.9743	26.7099	26.0487	27.181	26.427	26.3723	26.4617	27.1312	26.292	NaN	NaN	NaN	NaN	NaN	NaN	NaN	NaN	NaN	NaN
A0A6N4CSY1	Sulfatase-like hydrolase/transferase	ASJ32_05275 GO994_19360	OTHER	CytoplasmicMembrane	M	Sulfatase	Chromosome	NaN	NaN	NaN	NaN	NaN	NaN	NaN	NaN	NaN	NaN	NaN	NaN	NaN	NaN	NaN	NaN	24.4154	24.431	24.2736	25.5143	24.8111	24.7674	24.5052	25.0155	24.5676	24.761	25.4933	24.9528	23.8469	24.4044	24.3262	24.3279	NaN	NaN	NaN	NaN	NaN	NaN	NaN	NaN	NaN	NaN
A0A6N4CSY2	Threonine synthase (EC 4.2.3.1)	ASJ32_19330	OTHER	Cytoplasmic	E	Threonine synthase	Chromosome	26.4011	26.2693	25.5566	25.6994	26.8342	26.185	26.1907	25.7781	24.0897	25.8159	23.8998	24.1529	25.6882	25.9371	23.9698	25.1554	27.0902	26.7387	26.7618	26.3829	27.4852	27.3815	27.7065	26.7345	25.9834	25.7675	26.2193	26.2677	26.9294	26.4584	26.5949	27.2001	NaN	18.3477	NaN	NaN	20.1772	NaN	18.48	NaN	NaN	NaN
A0A6N4CSY5	Type II secretion system protein M (T2SS protein M) (General secretion pathway protein M)	ASJ32_05705 GO994_20110	OTHER	Unknown	U	Involved in a type II secretion system (T2SS, formerly general secretion pathway, GSP) for the export of proteins	Chromosome	NaN	NaN	NaN	NaN	NaN	NaN	NaN	NaN	NaN	NaN	NaN	NaN	NaN	NaN	NaN	NaN	25.8065	26.456	26.3516	26.5506	26.5179	25.5433	25.4078	25.8723	26.9197	25.4446	26.9447	26.4195	25.4141	25.9536	26.0846	26.4489	NaN	NaN	NaN	NaN	NaN	NaN	NaN	NaN	NaN	NaN
A0A6N4CSY6	Thiol:disulfide interchange protein DsbD (EC 1.8.1.8) (Protein-disulfide reductase) (Disulfide reductase)	dsbD ASJ32_17610	SP(Sec/SPI)	CytoplasmicMembrane	CO	Required to facilitate the formation of correct disulfide bonds in some periplasmic proteins and for the assembly of the periplasmic c-type cytochromes. Acts by transferring electrons from cytoplasmic thioredoxin to the periplasm. This transfer involves a cascade of disulfide bond formation and reduction steps	Chromosome	NaN	NaN	NaN	NaN	NaN	NaN	NaN	NaN	NaN	NaN	NaN	NaN	NaN	NaN	NaN	NaN	25.2012	24.8326	25.4443	24.9321	25.2907	25.1177	24.3448	24.6758	24.5624	25.3099	25.661	24.4529	24.4917	24.8677	25.8577	24.7149	NaN	NaN	NaN	NaN	NaN	NaN	NaN	NaN	NaN	NaN
A0A6N4CSY8	Probable peptidoglycan glycosyltransferase FtsW (PGT) (EC 2.4.1.129) (Cell division protein FtsW) (Cell wall polymerase) (Peptidoglycan polymerase) (PG polymerase)	ftsW ASJ32_15115 GO994_02365	OTHER	CytoplasmicMembrane	M	Peptidoglycan polymerase that is essential for cell division	Chromosome	NaN	NaN	NaN	NaN	NaN	NaN	NaN	NaN	NaN	NaN	NaN	NaN	NaN	NaN	NaN	NaN	22.6312	NaN	22.3395	NaN	22.3029	NaN	21.4986	NaN	23.5847	23.0941	22.9183	NaN	NaN	22.6273	20.987	NaN	NaN	NaN	NaN	NaN	NaN	NaN	NaN	NaN	NaN	NaN
A0A6N4CSZ0	Cell division protein ZapB	zapB ASJ32_19115	OTHER	Unknown	D	Non-essential, abundant cell division factor that is required for proper Z-ring formation. It is recruited early to the divisome by direct interaction with FtsZ, stimulating Z-ring assembly and thereby promoting cell division earlier in the cell cycle. Its recruitment to the Z-ring requires functional FtsA or ZipA	Chromosome	NaN	NaN	NaN	NaN	NaN	NaN	NaN	NaN	NaN	NaN	NaN	NaN	NaN	NaN	NaN	NaN	NaN	NaN	NaN	NaN	NaN	NaN	NaN	NaN	NaN	NaN	NaN	NaN	NaN	NaN	NaN	NaN	NaN	NaN	NaN	NaN	NaN	NaN	NaN	NaN	NaN	NaN
A0A6N4CSZ1	Mechanosensitive ion channel (Mechanosensitive ion channel protein)	ASJ32_18945 GO994_00435	OTHER	CytoplasmicMembrane	M	Conserved TM helix	Chromosome	NaN	NaN	NaN	NaN	NaN	NaN	NaN	NaN	NaN	NaN	NaN	NaN	NaN	NaN	NaN	NaN	28.3479	26.1847	28.429	27.958	27.7605	27.3028	26.4582	27.0377	28.1754	27.2879	28.4258	27.5547	27.8558	28.236	28.9549	28.3591	NaN	NaN	NaN	NaN	NaN	NaN	NaN	NaN	NaN	NaN
A0A6N4CSZ2	Uncharacterized protein	ASJ32_05330 GO994_19415	SP(Sec/SPI)	Unknown	-	-	Chromosome	NaN	NaN	NaN	NaN	NaN	NaN	NaN	NaN	NaN	NaN	NaN	NaN	NaN	NaN	NaN	NaN	21.7382	NaN	NaN	NaN	22.1497	23.454	23.4173	22.86	NaN	NaN	NaN	NaN	NaN	NaN	NaN	NaN	NaN	NaN	NaN	NaN	NaN	NaN	NaN	NaN	NaN	NaN
A0A6N4CSZ3	tRNA (guanosine(18)-2'-O)-methyltransferase (EC 2.1.1.34) (tRNA [Gm18] methyltransferase)	trmH ASJ32_09440 GO994_00175	OTHER	Cytoplasmic	J	Catalyzes the 2'-O methylation of guanosine at position 18 in tRNA	Chromosome	23.8407	23.7343	25.1675	24.1354	24.6126	25.1446	24.6212	25.14	24.5016	24.9322	25.4898	25.123	24.5291	24.3042	25.3893	25.0906	22.3377	22.3666	23.4135	23.0553	21.5805	22.6709	23.5894	23.8126	23.2017	23.32	22.6516	23.0505	22.6414	22.6407	23.2613	22.465	NaN	NaN	NaN	NaN	NaN	NaN	NaN	NaN	NaN	NaN
A0A6N4CSZ4	23S rRNA (uracil(1939)-C(5))-methyltransferase RlmD (EC 2.1.1.190) (23S rRNA(m5U1939)-methyltransferase)	rumA rlmD ASJ32_17720	OTHER	Cytoplasmic	J	Catalyzes the formation of 5-methyl-uridine at position 1939 (m5U1939) in 23S rRNA	Chromosome	23.1294	23.9449	23.3203	23.2847	22.4158	21.9949	21.9672	21.807	22.947	22.7188	23.9601	23.0658	23.6606	22.5124	22.9279	22.9524	25.7586	25.3433	25.2519	25.5345	25.2908	24.9079	25.6784	24.8281	25.4927	26.0301	25.1732	24.9963	25.382	25.0513	24.25	25.5997	NaN	NaN	NaN	17.0433	NaN	NaN	NaN	NaN	NaN	16.8244
A0A6N4CSZ5	Cystathionine gamma-synthase (O-succinylhomoserine (Thiol)-lyase) (EC 2.5.1.48)	metB ASJ32_05760 GO994_20055	OTHER	Cytoplasmic	E	Cys/Met metabolism PLP-dependent enzyme	Chromosome	26.6402	26.8608	27.1958	27.1484	27.2446	29.0494	27.7412	28.1891	26.6185	27.4446	26.0935	27.4946	27.4132	26.1748	26.931	28.7487	26.691	27.7597	25.9579	26.0833	27.5919	27.1509	27.0209	26.2937	25.926	27.0251	24.8929	26.6453	27.4094	26.4835	26.2332	25.9398	NaN	20.8908	NaN	19.0951	19.0071	NaN	NaN	NaN	NaN	NaN
A0A6N4CSZ7	ADP-heptose--LPS heptosyltransferase (Lipopolysaccharide heptosyltransferase family protein)	ASJ32_18995 GO994_00490	OTHER	Cytoplasmic	M	Glycosyltransferase family 9 (heptosyltransferase)	Chromosome	22.1112	22.5786	22.9226	22.0152	21.8894	20.8912	21.7291	21.9886	21.7814	21.6441	22.7551	20.879	21.7701	22.2395	22.7887	22.2657	26.5035	24.2595	25.8351	26.9134	25.9463	26.0945	26.1326	26.4151	25.8305	25.3872	25.0948	26.4917	25.7888	25.7977	25.6118	26.4775	16.9539	NaN	17.0157	16.3129	NaN	NaN	NaN	NaN	NaN	NaN
A0A6N4CT00	DUF218 domain-containing protein	ASJ32_05390	SP(Sec/SPI)	CytoplasmicMembrane	S	DUF218 domain	Chromosome	NaN	NaN	NaN	NaN	21.7454	NaN	23.5134	NaN	NaN	NaN	NaN	NaN	NaN	NaN	NaN	NaN	22.9462	NaN	24.1949	22.7144	23.4713	22.6312	NaN	NaN	24.1096	22.5511	24.2812	23.2409	23.5803	23.6632	22.4333	NaN	NaN	NaN	NaN	NaN	NaN	NaN	NaN	NaN	NaN	NaN
A0A6N4CT01	Uncharacterized protein	ASJ32_18740	OTHER	CytoplasmicMembrane	S	Pfam:UPF0118	Chromosome	NaN	NaN	NaN	NaN	NaN	NaN	NaN	NaN	NaN	NaN	NaN	NaN	NaN	NaN	NaN	NaN	22.7896	NaN	24.6574	23.1442	23.8849	NaN	NaN	NaN	24.0918	NaN	23.8515	NaN	21.9025	NaN	NaN	22.3122	NaN	NaN	NaN	NaN	NaN	NaN	NaN	NaN	NaN	NaN
A0A6N4CT05	DUF1456 family protein	ASJ32_17710 GO994_03915	OTHER	Unknown	S	Protein of unknown function (DUF1456)	Chromosome	25.644	26.3467	25.8795	25.1768	25.8602	25.0784	25.7068	25.3538	26.3579	26.209	26.0793	25.7433	25.2422	26.1558	24.4997	24.8468	22.69	NaN	22.9312	22.0604	21.7657	21.6871	21.2414	21.8237	23.3038	22.3352	24.5845	22.482	NaN	20.0111	NaN	20.444	NaN	NaN	NaN	NaN	NaN	NaN	NaN	NaN	NaN	NaN
A0A6N4CT09	Diguanylate cyclase	ASJ32_18795	OTHER	CytoplasmicMembrane	T	Cache domain	Chromosome	NaN	NaN	NaN	NaN	NaN	NaN	NaN	NaN	NaN	NaN	NaN	NaN	NaN	NaN	NaN	NaN	21.2269	NaN	20.7747	21.22	21.5108	21.4006	21.4739	21.3668	21.2236	NaN	NaN	NaN	21.3413	21.455	21.991	21.7569	NaN	NaN	NaN	NaN	NaN	NaN	NaN	NaN	NaN	NaN
A0A6N4CT14	Alpha-aspartyl dipeptidase	ASJ32_04210	OTHER	Cytoplasmic	E	Hydrolyzes dipeptides containing N-terminal aspartate residues. May play a role in allowing the cell to use peptide aspartate to spare carbon otherwise required for the synthesis of the aspartate family of amino acids	Chromosome	23.8414	24.4409	24.0998	23.6748	24.5934	23.7109	24.9018	24.523	23.3843	23.8188	22.3523	22.7948	24.516	23.8491	21.2988	22.9503	NaN	NaN	NaN	NaN	NaN	NaN	NaN	NaN	NaN	NaN	NaN	NaN	NaN	NaN	NaN	NaN	NaN	NaN	NaN	NaN	NaN	NaN	NaN	NaN	NaN	NaN
A0A6N4CT15	DUF3379 family protein	ASJ32_14515 GO994_12435	OTHER	Unknown	K	Protein of unknown function (DUF3379)	Chromosome	NaN	NaN	NaN	NaN	NaN	NaN	NaN	NaN	NaN	NaN	NaN	NaN	NaN	NaN	NaN	NaN	NaN	NaN	NaN	23.0846	22.1142	22.1107	21.1468	21.9358	20.9857	21.5346	21.7205	21.4585	NaN	NaN	NaN	22.4956	NaN	NaN	NaN	NaN	NaN	NaN	NaN	NaN	NaN	NaN
A0A6N4CT16	5'-nucleotidase SurE (EC 3.1.3.5) (Nucleoside 5'-monophosphate phosphohydrolase)	surE ASJ32_17765 GO994_03970	OTHER	Cytoplasmic	S	Nucleotidase that shows phosphatase activity on nucleoside 5'-monophosphates	Chromosome	24.9405	24.5048	25.1548	25.3782	25.5651	25.4327	25.368	25.4222	25.1946	25.1345	25.1426	25.281	24.9607	23.9712	24.4973	25.0042	23.2488	NaN	22.4083	NaN	23.3343	NaN	NaN	22.939	NaN	NaN	NaN	NaN	22.8744	23.8615	NaN	NaN	NaN	NaN	NaN	NaN	NaN	NaN	NaN	NaN	NaN	NaN
A0A6N4CT17	GCN5 family acetyltransferase	ASJ32_18775	OTHER	Unknown	M	COG0454 Histone acetyltransferase HPA2 and related acetyltransferases	Chromosome	NaN	NaN	NaN	NaN	NaN	NaN	20.8066	20.78	NaN	NaN	NaN	NaN	NaN	NaN	NaN	NaN	22.6225	23.3947	22.7464	22.2814	24.1699	23.533	24.2576	23.4205	21.7726	21.9315	22.5384	NaN	21.9472	21.8581	22.1186	23.1673	NaN	NaN	NaN	NaN	NaN	NaN	NaN	NaN	NaN	NaN
A0A6N4CT19	Membrane protein insertase YidC (Foldase YidC) (Membrane integrase YidC) (Membrane protein YidC)	yidC ASJ32_09635	OTHER	CytoplasmicMembrane	U	Required for the insertion and or proper folding and or complex formation of integral membrane proteins into the membrane. Involved in integration of membrane proteins that insert both dependently and independently of the Sec translocase complex, as well as at least some lipoproteins. Aids folding of multispanning membrane proteins	Chromosome	NaN	NaN	NaN	23.1695	21.2326	NaN	NaN	21.1986	22.4917	NaN	22.3398	NaN	22.3509	22.9185	23.2036	20.6501	28.9943	27.1489	29.541	28.8472	28.8093	28.0427	27.7796	28.0304	29.8448	28.5224	30.3148	28.7749	28.9753	29.1334	28.7241	28.6468	17.5797	NaN	17.4152	17.0309	19.1918	18.1184	NaN	18.1723	17.9652	18.0935
A0A6N4CT22	Ribosome maturation factor RimP	rimP ASJ32_04270 GO994_05260	OTHER	Cytoplasmic	S	Required for maturation of 30S ribosomal subunits	Chromosome	26.544	26.4334	25.6537	25.2484	25.968	26.8942	25.429	25.9635	27.2441	25.9079	27.1529	26.663	26.1818	25.5385	26.9519	26.4855	24.5044	23.8857	23.7946	25.0788	23.1095	24.7431	23.4686	24.6254	NaN	24.9714	NaN	23.6764	23.5808	23.3716	23.3176	25.2329	NaN	NaN	NaN	NaN	NaN	NaN	NaN	NaN	NaN	NaN
A0A6N4CT23	Probable septum site-determining protein MinC	minC ASJ32_14575 GO994_12495	OTHER	Cytoplasmic	D	Cell division inhibitor that blocks the formation of polar Z ring septums. Rapidly oscillates between the poles of the cell to destabilize FtsZ filaments that have formed before they mature into polar Z rings. Prevents FtsZ polymerization	Chromosome	24.5202	24.0768	24.8309	25.1908	25.808	27.3692	24.8375	25.4257	24.7581	26.578	24.1677	25.6178	24.395	23.6501	NaN	25.0912	23.6995	25.024	23.0632	22.2037	23.2831	24.4065	25.2397	24.5088	22.9436	25.0168	22.9321	23.9417	23.2189	22.2172	25.31	24.3566	NaN	NaN	NaN	NaN	NaN	NaN	NaN	NaN	NaN	NaN
A0A6N4CT24	Peptidase	ASJ32_05490	OTHER	CytoplasmicMembrane	S	Iron-regulated membrane protein	Chromosome	NaN	NaN	NaN	NaN	NaN	NaN	NaN	NaN	NaN	NaN	NaN	NaN	NaN	NaN	NaN	NaN	25.0464	24.2773	25.1372	25.5715	24.8903	21.7567	23.0068	23.3469	25.1194	25.0008	26.3111	26.3954	25.2069	25.5431	25.2032	25.9795	NaN	NaN	NaN	NaN	NaN	NaN	NaN	NaN	NaN	NaN
A0A6N4CT25	Phospholipase	ASJ32_04200	TAT(Tat/SPI)	Unknown	S	Patatin-like phospholipase	Chromosome	NaN	NaN	NaN	NaN	NaN	NaN	NaN	NaN	NaN	NaN	NaN	NaN	NaN	NaN	NaN	NaN	20.9751	NaN	NaN	NaN	22.6285	22.2386	21.7894	21.3115	NaN	NaN	NaN	NaN	NaN	21.1255	NaN	22.1111	NaN	NaN	NaN	NaN	NaN	NaN	NaN	NaN	NaN	NaN
A0A6N4CT26	ABC transporter substrate-binding protein	ASJ32_18825	SP(Sec/SPI)	Unknown	P	Bacterial extracellular solute-binding protein	Chromosome	NaN	NaN	NaN	NaN	NaN	NaN	NaN	NaN	NaN	NaN	NaN	NaN	NaN	NaN	NaN	NaN	NaN	NaN	NaN	NaN	NaN	NaN	NaN	NaN	NaN	NaN	NaN	NaN	NaN	NaN	NaN	NaN	NaN	NaN	NaN	NaN	NaN	NaN	NaN	NaN	NaN	NaN
A0A6N4CT30	Uncharacterized protein	ASJ32_05885	OTHER	CytoplasmicMembrane	P	Domain of unknown function DUF21	Chromosome	NaN	NaN	NaN	NaN	NaN	NaN	NaN	NaN	NaN	NaN	NaN	NaN	NaN	NaN	NaN	NaN	23.3374	NaN	22.9699	23.7773	24.055	23.4555	22.6329	23.0525	23.2217	23.5762	24.0434	23.5179	23.5308	23.4893	23.49	23.7546	NaN	NaN	NaN	NaN	NaN	NaN	NaN	NaN	NaN	NaN
A0A6N4CT33	Translation initiation factor IF-2	infB ASJ32_04260	OTHER	Cytoplasmic	J	One of the essential components for the initiation of protein synthesis. Protects formylmethionyl-tRNA from spontaneous hydrolysis and promotes its binding to the 30S ribosomal subunits. Also involved in the hydrolysis of GTP during the formation of the 70S ribosomal complex	Chromosome	29.1775	28.4445	28.4955	29.5288	28.8745	28.2018	28.2109	28.1741	29.4334	28.4003	29.4538	29.3799	28.8132	29.1147	28.9728	28.9775	29.3451	29.3646	30.0045	28.8749	28.9084	29.4068	29.5707	29.5989	29.8084	29.889	29.1301	29.8098	29.2983	28.9647	28.995	29.4145	23.34	22.4962	22.949	22.4678	20.0714	21.2496	21.0084	21.3349	22.4874	23.3885
A0A6N4CT37	Chemotaxis protein (HAMP domain-containing protein)	ASJ32_18520 GO994_17880	OTHER	Unknown	NT	Methyl-accepting chemotaxis protein	Chromosome	NaN	NaN	NaN	NaN	NaN	NaN	NaN	NaN	NaN	NaN	NaN	NaN	NaN	NaN	NaN	NaN	24.2859	22.7069	22.9835	23.8017	23.6316	22.7515	22.5639	21.6547	21.4818	21.8838	NaN	22.7912	22.7814	22.556	23.2533	24.3418	NaN	NaN	NaN	NaN	NaN	NaN	NaN	NaN	NaN	NaN
A0A6N4CT41	DNA polymerase (EC 2.7.7.7)	ASJ32_14690	OTHER	Cytoplasmic	L	DNA polymerase	Chromosome	NaN	NaN	NaN	NaN	NaN	NaN	NaN	NaN	NaN	21.4598	20.9847	22.1387	NaN	NaN	NaN	21.3739	NaN	NaN	NaN	NaN	NaN	NaN	NaN	NaN	NaN	NaN	NaN	NaN	NaN	NaN	NaN	NaN	NaN	NaN	NaN	NaN	NaN	NaN	NaN	NaN	NaN	NaN
A0A6N4CT42	tRNA uridine 5-carboxymethylaminomethyl modification enzyme MnmG (Glucose-inhibited division protein A)	gidA mnmG ASJ32_09740	OTHER	Cytoplasmic	D	NAD-binding protein involved in the addition of a carboxymethylaminomethyl (cmnm) group at the wobble position (U34) of certain tRNAs, forming tRNA-cmnm(5)s(2)U34	Chromosome	27.1382	26.9358	27.4359	27.1337	26.9476	27.3795	26.705	26.9251	27.1603	26.9983	27.5848	27.5832	27.1118	27.0617	27.2674	26.9658	25.2661	26.553	26.1465	25.4477	24.9802	25.4382	24.7996	26.1355	25.7432	25.7189	25.687	26.094	25.9558	25.7299	26.7299	25.5043	NaN	16.8236	15.9848	16.0324	NaN	15.188	NaN	16.681	NaN	16.8039
A0A6N4CT43	Transcription elongation factor GreA (Transcript cleavage factor GreA)	greA ASJ32_04325 GO994_05205	OTHER	Cytoplasmic	K	Necessary for efficient RNA polymerase transcription elongation past template-encoded arresting sites. The arresting sites in DNA have the property of trapping a certain fraction of elongating RNA polymerases that pass through, resulting in locked ternary complexes. Cleavage of the nascent transcript by cleavage factors such as GreA or GreB allows the resumption of elongation from the new 3'termi…	Chromosome	26.9084	26.8904	26.0759	25.8797	27.0002	26.503	26.7173	26.5195	26.4049	27.1561	26.4407	26.4151	26.4873	26.5244	25.7	26.5908	NaN	22.5653	22.4486	22.4324	NaN	NaN	NaN	NaN	22.9349	22.7451	NaN	22.7863	22.8127	22.0769	21.72	22.3367	NaN	NaN	NaN	NaN	NaN	NaN	NaN	NaN	NaN	NaN
A0A6N4CT45	HTH-type transcriptional regulator ArgP	argP ASJ32_05590 GO994_20225	OTHER	Cytoplasmic	K	transcriptional regulator, ArgP	Chromosome	20.2255	20.9156	21.8402	21.2659	20.3247	NaN	NaN	21.3261	20.7656	NaN	NaN	NaN	21.385	NaN	NaN	21.2042	22.5846	21.5981	23.0882	23.058	23.1484	22.7952	23.1407	22.9103	22.7499	22.8476	23.0309	22.5345	23.3643	23.0021	22.4647	22.4806	NaN	NaN	NaN	NaN	NaN	NaN	NaN	NaN	NaN	NaN
A0A6N4CT46	4-alpha-glucanotransferase (EC 2.4.1.25) (Amylomaltase) (Disproportionating enzyme)	ASJ32_18500	OTHER	Cytoplasmic	G	4-alpha-glucanotransferase	Chromosome	25.387	26.0163	26.2427	25.7309	25.9668	26.3622	26.2227	26.4602	26.0319	25.9698	25.2206	26.2398	25.4404	25.7076	25.0125	25.5757	22.6807	24.1342	22.8649	22.8667	23.6103	23.6526	22.8472	22.9654	23.5417	23.3813	22.6077	22.3041	23.2788	24.2007	21.8864	22.0066	NaN	NaN	NaN	NaN	NaN	NaN	NaN	NaN	17.7185	NaN
A0A6N4CT47	ABC transporter (ATP-binding cassette domain-containing protein)	ASJ32_18575 GO994_17825	OTHER	CytoplasmicMembrane	V	AAA domain, putative AbiEii toxin, Type IV TA system	Chromosome	21.7018	22.4165	22.1715	22.2689	21.0224	NaN	NaN	21.2185	21.9594	NaN	22.9273	NaN	21.8802	22.7645	22.8165	21.3238	25.2854	23.2647	25.023	25.2576	24.905	24.5617	23.9866	24.2549	24.8968	24.4361	25.268	24.8641	25.0182	24.8139	25.4267	24.8905	NaN	NaN	NaN	NaN	NaN	NaN	NaN	NaN	NaN	NaN
A0A6N4CT48	General secretion pathway protein H (Type II secretion system protein H)	gspH exeH ASJ32_05680 GO994_20135	OTHER	CytoplasmicMembrane	NU	general secretion pathway protein H	Chromosome	NaN	NaN	NaN	NaN	NaN	NaN	NaN	NaN	NaN	NaN	NaN	NaN	NaN	NaN	NaN	NaN	22.0906	22.7661	21.8302	23.7926	21.8076	22.2947	22.5061	22.5318	20.7245	22.1617	22.1156	22.7399	21.3726	22.0926	22.821	22.2896	NaN	NaN	NaN	NaN	NaN	NaN	NaN	NaN	NaN	NaN
A0A6N4CT49	ABC transporter ATP-binding protein (Dipeptide ABC transporter ATP-binding protein)	ASJ32_04380 GO994_05155	OTHER	CytoplasmicMembrane	P	Belongs to the ABC transporter superfamily	Chromosome	23.9652	23.3748	25.4155	25.5314	23.9561	23.0827	22.2663	23.201	22.8452	23.517	24.359	24.112	24.6655	23.5029	25.3476	24.1884	26.1961	24.0775	25.7553	26.3412	26.1862	25.8397	25.9608	25.8428	25.8295	25.7952	26.0357	26.4473	25.7682	25.9704	26.5992	26.7498	NaN	NaN	NaN	NaN	NaN	NaN	NaN	NaN	NaN	NaN
A0A6N4CT50	Asparagine synthase (glutamine-hydrolyzing) (EC 6.3.5.4)	asnB ASJ32_19975	OTHER	Cytoplasmic	E	asparagine synthase (glutamine-hydrolyzing)	Chromosome	27.5653	27.4886	27.7507	27.6834	27.6209	27.4565	27.3499	27.371	27.1769	26.877	26.6869	26.9403	27.5221	27.4328	26.1614	27.1005	27.4383	27.4337	28.1407	26.6697	27.4852	27.2781	27.149	26.7332	27.4622	27.2854	26.4747	25.9897	27.9064	27.5455	26.2972	26.6996	22.2327	21.1366	22.4632	22.7693	20.2759	21.1905	20.1327	21.6894	20.9115	23.1566
A0A6N4CT52	Phosphoenolpyruvate carboxykinase (ATP) (PCK) (PEP carboxykinase) (PEPCK) (EC 4.1.1.49)	pckA ASJ32_05640	OTHER	Cytoplasmic	H	Involved in the gluconeogenesis. Catalyzes the conversion of oxaloacetate (OAA) to phosphoenolpyruvate (PEP) through direct phosphoryl transfer between the nucleoside triphosphate and OAA	Chromosome	27.9699	28.1209	27.4332	27.3641	28.6463	28.4796	28.4828	28.2126	27.9938	28.7135	27.9188	27.9503	27.8337	27.6301	26.7647	27.3413	25.2952	24.2894	26.0768	24.5445	24.9339	25.5351	24.4375	24.9543	25.8681	26.1177	25.836	25.479	25.2504	25.3575	25.737	25.4226	NaN	NaN	NaN	NaN	NaN	NaN	NaN	NaN	NaN	NaN
A0A6N4CT53	UDP-N-acetylmuramate--L-alanyl-gamma-D-glutamyl-meso-2,6-diaminoheptandioate ligase (EC 6.3.2.45) (Murein peptide ligase) (UDP-N-acetylmuramate:L-alanyl-gamma-D-glutamyl-meso-diaminopimelate ligase)	mpl ASJ32_18555 GO994_17845	SP(Sec/SPI)	Cytoplasmic	M	Reutilizes the intact tripeptide L-alanyl-gamma-D- glutamyl-meso-diaminopimelate by linking it to UDP-N- acetylmuramate	Chromosome	25.7704	26.4091	26.067	25.7113	26.197	26.3056	26.576	25.8766	25.5599	26.5479	25.3538	26.1416	26.1606	26.0841	24.8824	26.2693	26.7262	26.5005	26.4638	26.5539	26.2879	26.5273	26.0206	26.415	26.5283	25.5781	25.8524	25.9288	26.6675	26.3672	26.1037	26.9459	NaN	NaN	NaN	NaN	NaN	NaN	NaN	NaN	NaN	NaN
A0A6N4CT54	ATP synthase subunit beta (EC 7.1.2.2) (ATP synthase F1 sector subunit beta) (F-ATPase subunit beta)	atpD ASJ32_09795 GO994_22050	OTHER	Cytoplasmic	C	Produces ATP from ADP in the presence of a proton gradient across the membrane. The catalytic sites are hosted primarily by the beta subunits	Chromosome	30.7087	30.3989	31.1095	31.2379	30.6051	30.2241	29.9093	30.5351	30.4987	30.5871	31.4423	30.5918	30.4498	31.221	31.7655	30.6095	29.7562	29.7839	30.2824	29.5285	29.602	29.847	29.3777	30.1569	30.3087	29.7903	30.6107	30.0909	30.1749	30.5367	31.3356	30.3318	21.458	21.4805	21.2874	20.9158	21.1432	20.7609	21.3724	22.0583	21.3933	21.1849
A0A6N4CT55	ATP-dependent helicase	ASJ32_18630	SP(Sec/SPI)	CytoplasmicMembrane	L	ATP-dependent helicase HrpB	Chromosome	NaN	NaN	NaN	NaN	NaN	NaN	NaN	NaN	NaN	NaN	NaN	NaN	NaN	NaN	NaN	NaN	23.8853	23.6944	22.9477	23.887	23.7597	22.8919	23.2074	23.1075	23.0333	23.3131	22.9693	23.6686	22.8612	22.7648	23.8617	23.9471	NaN	NaN	NaN	NaN	NaN	NaN	NaN	NaN	NaN	NaN
A0A6N4CT57	Deaminase (Dihydrofolate reductase)	ASJ32_19730 GO994_04070	OTHER	Cytoplasmic	H	dihydrofolate reductase	Chromosome	NaN	NaN	NaN	NaN	22.145	20.9139	21.9837	NaN	NaN	NaN	NaN	NaN	NaN	NaN	NaN	NaN	23.3355	24.2565	23.0141	23.5046	24.7421	24.2623	24.9247	23.9411	22.5845	21.5974	23.0841	22.8877	23.2992	22.4517	22.7271	23.1783	NaN	NaN	NaN	NaN	NaN	NaN	NaN	NaN	NaN	NaN
A0A6N4CT59	ATP-dependent RNA helicase DeaD (EC 3.6.4.13) (Cold-shock DEAD box protein A)	deaD csdA ASJ32_20030	OTHER	Cytoplasmic	JKL	DEAD-box RNA helicase involved in various cellular processes at low temperature, including ribosome biogenesis, mRNA degradation and translation initiation	Chromosome	30.3101	29.8767	29.4876	31.1756	29.9056	29.9691	29.9134	29.4685	29.9335	29.8551	30.8598	30.7951	29.8882	29.4933	30.4788	30.309	31.5232	31.3145	31.6337	31.5888	31.0965	31.1685	31.4151	31.1355	31.7378	31.7376	31.7392	31.8559	31.1976	31.1772	31.0686	30.7846	25.6806	25.5879	25.7091	25.8403	25.0356	24.5088	24.941	24.6696	25.6711	25.7434
A0A6N4CT62	ADP-heptose--LPS heptosyltransferase I (Glycosyl transferase)	ASJ32_09415 GO994_00200	OTHER	Cytoplasmic	M	Glycosyltransferase family 9 (heptosyltransferase)	Chromosome	NaN	NaN	NaN	NaN	NaN	NaN	NaN	NaN	NaN	NaN	NaN	NaN	NaN	NaN	NaN	NaN	22.8041	21.9307	22.9992	23.82	22.9845	22.5702	22.0744	23.2033	23.048	22.1431	22.7734	22.6847	22.8031	22.9666	22.7138	NaN	NaN	NaN	NaN	NaN	NaN	NaN	NaN	NaN	NaN	NaN
A0A6N4CT63	Glutamate-1-semialdehyde 2,1-aminomutase (GSA) (EC 5.4.3.8) (Glutamate-1-semialdehyde aminotransferase) (GSA-AT)	hemL ASJ32_18685 GO994_17715	OTHER	Cytoplasmic	H	Glutamate-1-semialdehyde aminotransferase	Chromosome	22.2457	21.17	23.0549	23.4005	22.7387	20.6126	22.1603	21.5914	20.7857	23.9694	22.4362	23.1387	21.642	22.0594	21.6083	23.0545	25.3862	26.4344	24.8833	26.3309	25.3578	25.2047	25.8782	25.7189	25.1108	26.0291	25.5255	26.188	25.3393	25.2471	25.7521	26.387	19.1248	19.4606	19.3526	19.1039	19.3654	19.0215	19.2741	20.0917	19.3637	19.4443
A0A6N4CT68	Ion-translocating oxidoreductase complex subunit G (EC 7.-.-.-) (Rnf electron transport complex subunit G)	rsxG rnfG ASJ32_20080 GO994_13250	LIPO(Sec/SPII)	Unknown	C	Part of a membrane complex involved in electron transport	Chromosome	NaN	NaN	NaN	NaN	NaN	NaN	NaN	NaN	NaN	NaN	NaN	NaN	NaN	NaN	NaN	NaN	25.8631	24.5957	25.3028	25.7339	25.9494	25.1486	25.6843	25.0173	26.0185	25.704	25.8945	25.566	24.9154	25.1872	25.2839	25.4112	NaN	NaN	NaN	NaN	18.0133	NaN	NaN	NaN	NaN	NaN
A0A6N4CT69	Uncharacterized protein	ASJ32_14810	OTHER	Cytoplasmic	S	YaeQ	Chromosome	NaN	22.2389	NaN	NaN	NaN	NaN	22.3077	NaN	NaN	NaN	NaN	NaN	NaN	NaN	NaN	NaN	NaN	NaN	NaN	NaN	NaN	NaN	NaN	NaN	NaN	22.8419	NaN	NaN	22.3533	NaN	NaN	NaN	NaN	NaN	NaN	NaN	NaN	NaN	NaN	NaN	NaN	NaN
A0A6N4CT70	L,D-transpeptidase	ASJ32_18205	SP(Sec/SPI)	Unknown	M	L,D-transpeptidase catalytic domain	Chromosome	24.0184	23.7558	24.1337	23.6788	24.6507	23.6869	23.6241	23.6974	23.121	23.935	22.4295	23.6134	23.4554	22.5648	NaN	23.2557	23.4718	24.4895	23.5812	22.9656	22.0987	23.287	22.5931	23.328	22.777	24.1893	23.3336	23.2399	22.9349	22.1469	23.1095	23.6249	NaN	NaN	NaN	NaN	NaN	NaN	NaN	NaN	NaN	NaN
A0A6N4CT72	RNA polymerase-associated protein RapA (EC 3.6.4.-) (ATP-dependent helicase HepA)	rapA ASJ32_19845 GO994_04190	OTHER	Cytoplasmic	K	Transcription regulator that activates transcription by stimulating RNA polymerase (RNAP) recycling in case of stress conditions such as supercoiled DNA or high salt concentrations. Probably acts by releasing the RNAP, when it is trapped or immobilized on tightly supercoiled DNA. Does not activate transcription on linear DNA. Probably not involved in DNA repair	Chromosome	25.1371	25.206	25.574	25.5274	24.3732	24.704	24.7996	23.9919	24.6086	25.1261	25.0585	25.3633	24.8699	25.012	25.3049	24.647	26.6726	25.8932	27.0929	26.4907	26.4054	26.2213	26.0992	26.0522	26.7227	26.2855	26.664	26.5563	26.674	26.6518	27.3291	26.5554	19.7696	19.2241	19.5383	19.1676	18.8861	18.1894	NaN	19.1136	19.0179	17.9147
A0A6N4CT74	Uncharacterized protein	ASJ32_01700	SP(Sec/SPI)	Unknown	-	-	Chromosome	23.7531	24.2192	24.5191	23.6711	24.4634	23.9104	24.5135	23.8668	23.2246	23.4047	23.2598	23.6454	22.7513	22.3254	22.904	23.624	NaN	NaN	NaN	NaN	NaN	NaN	NaN	NaN	NaN	NaN	NaN	NaN	NaN	NaN	NaN	NaN	NaN	NaN	NaN	NaN	NaN	NaN	NaN	NaN	NaN	NaN
A0A6N4CT75	Glutamyl-Q tRNA(Asp) synthetase (Glu-Q-RSs) (EC 6.1.1.-)	gluQ ASJ32_18610	OTHER	Unknown	J	Catalyzes the tRNA-independent activation of glutamate in presence of ATP and the subsequent transfer of glutamate onto a tRNA(Asp). Glutamate is transferred on the 2-amino-5-(4,5- dihydroxy-2-cyclopenten-1-yl) moiety of the queuosine in the wobble position of the QUC anticodon	Chromosome	NaN	NaN	NaN	NaN	NaN	NaN	NaN	NaN	NaN	NaN	NaN	NaN	NaN	NaN	NaN	NaN	23.5218	24.267	NaN	24.6103	23.9631	24.6193	24.7857	23.4064	NaN	24.2872	NaN	NaN	NaN	NaN	23.8278	NaN	NaN	NaN	NaN	NaN	NaN	NaN	NaN	NaN	NaN	NaN
A0A6N4CT76	Hypoxanthine phosphoribosyltransferase (EC 2.4.2.8)	hpt ASJ32_18570 GO994_17830	OTHER	Cytoplasmic	F	Belongs to the purine pyrimidine phosphoribosyltransferase family	Chromosome	26.7162	26.4103	25.9126	26.028	26.4854	26.8478	26.8297	26.6859	26.0063	26.5665	25.6262	26.854	26.3256	24.7203	24.8384	25.8573	24.5462	25.1253	22.9721	24.2821	24.1489	23.8172	23.5445	23.6043	22.9467	24.5768	22.4652	23.5081	23.884	23.5128	22.7356	23.6148	NaN	NaN	NaN	16.3422	NaN	NaN	NaN	NaN	NaN	NaN
A0A6N4CT77	Type II secretion system protein K	gspK exeK ASJ32_05695 GO994_20120	OTHER	CytoplasmicMembrane	U	Type II secretion system (T2SS), protein K	Chromosome	NaN	NaN	NaN	NaN	NaN	NaN	NaN	NaN	NaN	NaN	NaN	NaN	NaN	NaN	NaN	NaN	23.8086	NaN	23.8791	24.318	23.8013	23.6827	23.1132	23.4297	23.9169	22.9481	24.1157	23.8067	23.6887	23.7097	NaN	24.0367	NaN	NaN	NaN	NaN	NaN	NaN	NaN	NaN	NaN	NaN
A0A6N4CT79	Amino acid:proton symporter	ASJ32_14545	OTHER	CytoplasmicMembrane	C	Belongs to the dicarboxylate amino acid cation symporter (DAACS) (TC 2.A.23) family	Chromosome	NaN	NaN	NaN	NaN	NaN	NaN	NaN	NaN	NaN	NaN	NaN	NaN	NaN	NaN	NaN	NaN	24.6948	NaN	25.0517	NaN	24.62	NaN	23.7297	NaN	25.2347	22.2731	24.7513	24.1289	22.2874	24.8356	NaN	24.1112	NaN	NaN	NaN	NaN	NaN	NaN	NaN	NaN	NaN	NaN
A0A6N4CT81	Chemotaxis protein	ASJ32_04610	OTHER	CytoplasmicMembrane	NT	Cache domain	Chromosome	22.5749	21.8188	22.8169	23.8012	20.5857	NaN	NaN	NaN	23.0665	20.973	24.1025	21.0475	22.8057	23.6223	22.8521	22.01	27.8806	27.5497	27.5298	28.0633	27.491	27.0019	26.6109	26.9811	28.2004	27.5726	28.5531	28.2029	27.7394	28.024	28.6646	27.9514	NaN	NaN	NaN	NaN	NaN	NaN	NaN	NaN	NaN	NaN
A0A6N4CT82	Ribose-5-phosphate isomerase A (EC 5.3.1.6) (Phosphoriboisomerase A) (PRI)	rpiA ASJ32_19565 GO994_08020	OTHER	Cytoplasmic	G	Catalyzes the reversible conversion of ribose-5- phosphate to ribulose 5-phosphate	Chromosome	27.4226	27.3168	28.2631	27.1008	27.0649	26.7995	27.122	27.1131	26.7367	28.0165	27.495	27.6956	26.7771	26.1257	26.6046	27.1253	NaN	NaN	NaN	NaN	NaN	23.3395	NaN	NaN	NaN	22.8234	NaN	23.1234	NaN	NaN	NaN	23.1846	NaN	NaN	NaN	NaN	NaN	NaN	NaN	NaN	NaN	NaN
A0A6N4CT83	Asparaginase (EC 3.5.1.1)	ansA ASJ32_04600	OTHER	Cytoplasmic	EJ	Asparaginase	Chromosome	24.1427	23.8465	23.8237	24.3242	24.5763	25.0189	24.7752	24.3452	22.286	22.6562	NaN	NaN	24.0513	24.6777	23.8712	24.184	23.8371	25.9942	23.5513	NaN	22.778	23.7071	23.8896	24.1087	NaN	23.4102	NaN	24.7477	24.1174	23.1151	24.6334	24.2119	NaN	NaN	NaN	NaN	NaN	NaN	NaN	NaN	NaN	NaN
A0A6N4CT85	tRNA-binding protein	ASJ32_05745	OTHER	Cytoplasmic	S	Putative tRNA binding domain	Chromosome	NaN	NaN	NaN	NaN	NaN	NaN	NaN	NaN	NaN	NaN	NaN	NaN	NaN	NaN	NaN	NaN	NaN	NaN	NaN	NaN	NaN	NaN	NaN	NaN	NaN	NaN	NaN	NaN	NaN	NaN	NaN	NaN	NaN	NaN	NaN	NaN	NaN	NaN	NaN	NaN	NaN	NaN
A0A6N4CT87	Probable phosphatase ASJ32_14100 (EC 3.1.3.-)	ASJ32_14100	OTHER	Cytoplasmic	E	zinc ion binding	Chromosome	23.2306	23.1355	22.2743	22.5734	22.8916	23.849	23.3465	22.9907	22.6041	23.886	21.8051	22.8464	23.1403	21.9521	22.793	23.6517	24.5017	24.5845	23.9907	23.9788	24.556	24.4219	24.3535	24.1932	23.943	24.197	22.6254	24.2999	24.6482	24.2039	23.5624	23.5167	NaN	17.8271	NaN	17.2736	17.391	NaN	NaN	NaN	NaN	NaN
A0A6N4CT88	DUF3369 domain-containing protein (Phosphodiesterase)	ASJ32_18660 GO994_17740	OTHER	Cytoplasmic	T	Domain of unknown function (DUF3369)	Chromosome	23.5868	23.3051	24.0079	24.0266	24.3558	24.606	24.5139	23.8414	23.1129	23.2959	23.2676	23.5348	22.8082	23.878	22.0668	23.047	23.007	23.4209	22.709	22.7182	23.9157	24.883	24.6073	24.7322	23.2717	23.8483	23.0103	23.6093	23.1181	22.5289	23.2852	24.1506	NaN	NaN	NaN	NaN	NaN	NaN	NaN	NaN	NaN	NaN
A0A6N4CT89	DUF4357 domain-containing protein	ASJ32_01755 GO994_13655	OTHER	Unknown	S	Domain of unknown function (DUF4357)	Chromosome	25.7696	24.8124	26.0524	26.3204	26.268	26.6606	25.78	26.1265	24.9599	23.6438	25.367	25.6205	25.6391	26.2015	26.0687	26.2667	23.2356	23.4452	23.0525	NaN	NaN	23.7453	23.911	22.8314	NaN	NaN	NaN	NaN	NaN	NaN	NaN	NaN	NaN	NaN	NaN	NaN	NaN	NaN	NaN	NaN	NaN	NaN
A0A6N4CT90	Uncharacterized protein	ASJ32_19615	OTHER	Unknown	G	Cupin 2, conserved barrel domain protein	Chromosome	NaN	NaN	NaN	NaN	21.8096	22.4046	21.4084	22.4364	NaN	NaN	NaN	NaN	21.484	NaN	NaN	NaN	22.7436	22.7562	22.525	23.5633	23.2703	22.4418	22.6583	23.4538	21.9332	NaN	21.0198	22.726	21.2887	21.1868	NaN	22.7846	NaN	NaN	NaN	NaN	NaN	NaN	NaN	NaN	NaN	NaN
A0A6N4CT91	Diaminopimelate decarboxylase (DAP decarboxylase) (DAPDC) (EC 4.1.1.20)	lysA ASJ32_05180	OTHER	Cytoplasmic	E	Specifically catalyzes the decarboxylation of meso- diaminopimelate (meso-DAP) to L-lysine	Chromosome	26.257	26.5885	25.5975	25.4144	27.191	26.9482	27.23	26.5853	25.8572	26.0196	24.5667	25.8378	26.1324	25.0057	23.7401	25.3239	23.1832	21.6128	23.486	22.635	22.9094	24.1805	23.3683	24.1821	22.5202	23.2669	23.4707	22.2442	23.7127	24.7416	20.8802	23.0591	NaN	NaN	NaN	NaN	NaN	NaN	NaN	NaN	NaN	NaN
A0A6N4CT92	Threonine/serine exporter family protein	ASJ32_04670 GO994_04870	OTHER	CytoplasmicMembrane	S	Putative threonine/serine exporter	Chromosome	NaN	NaN	NaN	NaN	NaN	NaN	NaN	NaN	NaN	NaN	NaN	NaN	NaN	NaN	NaN	NaN	23.0072	NaN	22.5484	21.5419	23.2954	21.9868	20.9632	NaN	23.3685	21.9176	23.669	22.4347	22.0036	22.9942	NaN	21.5516	NaN	NaN	NaN	NaN	NaN	NaN	NaN	NaN	NaN	NaN
A0A6N4CT96	Aspartokinase (EC 2.7.2.4)	ASJ32_01820	OTHER	Unknown	E	Belongs to the aspartokinase family	Chromosome	23.7304	21.7311	NaN	22.8733	23.3745	23.6571	24.8083	22.891	NaN	NaN	NaN	NaN	23.8481	NaN	NaN	21.7097	24.7926	25.3694	22.8986	23.0462	25.5052	25.9433	26.1252	24.8825	23.4114	25.12	23.2828	24.2263	24.6461	23.7707	NaN	24.8553	NaN	NaN	NaN	NaN	NaN	NaN	NaN	NaN	NaN	NaN
A0A6N4CT97	AsnC family transcriptional regulator (Winged helix-turn-helix transcriptional regulator)	ASJ32_18310 GO994_03420	OTHER	Cytoplasmic	K	AsnC-type helix-turn-helix domain	Chromosome	23.8356	23.2909	23.5189	22.1534	24.391	22.8381	23.8697	23.5222	22.2694	22.548	NaN	NaN	23.3087	22.063	NaN	22.2166	21.8259	NaN	22.1975	NaN	21.9391	22.5971	21.8193	22.2142	NaN	23.3961	22.1697	NaN	22.4429	NaN	NaN	20.9339	NaN	NaN	NaN	NaN	NaN	NaN	NaN	NaN	NaN	NaN
A0A6N4CTA5	DNA-binding transcriptional repressor (Transcriptional regulator)	srlR gutR ASJ32_18360 GO994_03360	OTHER	Cytoplasmic	K	DeoR C terminal sensor domain	Chromosome	22.3808	22.4675	21.7254	21.9516	23.1903	22.4369	22.5862	22.819	22.4806	22.4101	NaN	21.714	23.0139	21.9382	NaN	NaN	20.7264	NaN	NaN	NaN	21.6342	NaN	21.5868	NaN	NaN	NaN	NaN	NaN	NaN	NaN	NaN	20.3388	NaN	NaN	NaN	NaN	NaN	NaN	NaN	NaN	NaN	NaN
A0A6N4CTA6	Sodium/proline symporter (Proline permease)	putP ASJ32_18200 GO994_03530	OTHER	CytoplasmicMembrane	E	Belongs to the sodium solute symporter (SSF) (TC 2.A.21) family	Chromosome	NaN	NaN	NaN	NaN	NaN	NaN	NaN	NaN	NaN	NaN	NaN	NaN	NaN	NaN	NaN	NaN	25.8141	24.1588	27.2146	26.5649	26.1745	25.4302	25.7207	26.2681	26.6151	25.4559	26.8932	26.6109	26.6185	27.0888	27.4014	26.6885	NaN	NaN	NaN	NaN	NaN	NaN	NaN	NaN	NaN	NaN
A0A6N4CTA9	DNA repair protein (DUF2799 domain-containing protein)	ASJ32_18290 GO994_03440	LIPO(Sec/SPII)	Cytoplasmic	S	Protein of unknown function (DUF2799)	Chromosome	NaN	NaN	NaN	NaN	NaN	NaN	NaN	NaN	NaN	NaN	NaN	NaN	NaN	NaN	NaN	NaN	25.755	26.5863	25.8937	26.1574	26.4927	25.7693	25.4284	25.0865	25.1023	24.9252	25.0257	25.9829	25.6339	26.4762	26.8158	26.681	NaN	NaN	NaN	NaN	NaN	NaN	NaN	NaN	NaN	NaN
A0A6N4CTB2	Uncharacterized protein	ASJ32_04710	LIPO(Sec/SPII)	CytoplasmicMembrane	S	Protein of unknown function (DUF3261)	Chromosome	NaN	NaN	NaN	NaN	NaN	NaN	NaN	NaN	NaN	NaN	NaN	NaN	NaN	NaN	NaN	NaN	NaN	NaN	22.4964	23.083	NaN	NaN	NaN	NaN	22.7846	NaN	23.5908	NaN	NaN	NaN	NaN	NaN	NaN	NaN	NaN	NaN	NaN	NaN	NaN	NaN	NaN	NaN
A0A6N4CTB4	Cell envelope biogenesis protein AsmA	ASJ32_18415	OTHER	Unknown	M	AsmA family	Chromosome	NaN	NaN	25.2448	26.2249	25.3701	NaN	NaN	25.0724	24.7203	NaN	NaN	NaN	NaN	NaN	NaN	24.4798	27.1816	26.1117	27.1136	27.726	27.4712	27.2353	27.0442	27.2843	26.8963	26.5454	27.0289	26.9826	27.0222	27.346	27.6292	27.3822	NaN	NaN	NaN	NaN	NaN	NaN	NaN	NaN	NaN	NaN
A0A6N4CTB5	Uncharacterized protein	ASJ32_18255	LIPO(Sec/SPII)	Unknown	S	Mediates coordination of peptidoglycan synthesis and outer membrane constriction during cell division	Chromosome	24.525	24.9095	25.4928	25.0647	25.5827	25.993	25.8532	26.2049	24.035	24.5532	22.4128	24.7938	24.5567	24.5482	22.8516	25.2522	22.5298	22.0181	21.7764	24.3215	22.492	23.64	24.3074	24.8671	NaN	22.4517	21.979	22.3483	21.5883	NaN	22.5048	24.0137	NaN	NaN	NaN	NaN	NaN	NaN	NaN	NaN	NaN	NaN
A0A6N4CTB7	Uncharacterized protein	ASJ32_05940 ASJ32_12025	OTHER	Unknown	-	-	Chromosome	NaN	NaN	NaN	NaN	NaN	NaN	NaN	NaN	NaN	NaN	NaN	NaN	NaN	NaN	NaN	NaN	NaN	NaN	NaN	NaN	NaN	NaN	NaN	NaN	NaN	NaN	NaN	NaN	NaN	22.6872	NaN	23.3836	NaN	NaN	NaN	NaN	NaN	NaN	NaN	NaN	NaN	NaN
A0A6N4CTB8	ADP-ribose pyrophosphatase	ASJ32_18340	OTHER	Unknown	F	Belongs to the Nudix hydrolase family	Chromosome	NaN	21.2286	NaN	NaN	21.0113	NaN	NaN	NaN	NaN	NaN	NaN	NaN	NaN	NaN	NaN	20.7762	21.4203	NaN	NaN	NaN	21.2646	NaN	21.8868	NaN	NaN	NaN	NaN	NaN	NaN	NaN	NaN	21.013	NaN	NaN	NaN	NaN	NaN	NaN	NaN	NaN	NaN	NaN
A0A6N4CTC0	Histidine kinase (EC 2.7.13.3)	ASJ32_14305	OTHER	Cytoplasmic	NT	Signal transducing histidine kinase, homodimeric domain	Chromosome	21.7535	NaN	NaN	22.7514	22.7644	21.7739	21.8298	21.7961	21.5466	21.5385	22.2207	21.5953	22.242	NaN	21.857	22.1693	26.2247	25.7851	26.034	26.7851	26.0968	26.0336	26.3336	26.5542	25.8045	25.5042	26.298	26.1932	26.0383	25.9739	27.3773	26.8002	19.8359	19.9173	19.589	18.9004	17.9855	NaN	NaN	NaN	18.7401	19.0244
A0A6N4CTC1	FUSC-like domain-containing protein	ASJ32_19405	OTHER	CytoplasmicMembrane	S	FUSC-like inner membrane protein yccS	Chromosome	NaN	NaN	NaN	NaN	NaN	NaN	NaN	NaN	NaN	NaN	NaN	NaN	NaN	NaN	NaN	NaN	NaN	NaN	NaN	23.893	NaN	NaN	NaN	NaN	21.7735	21.9097	22.9254	NaN	22.5556	23.393	24.4669	23.0941	NaN	NaN	NaN	NaN	NaN	NaN	NaN	NaN	NaN	NaN
A0A6N4CTC2	Glutathione S-transferase	ASJ32_05340	OTHER	Cytoplasmic	O	Glutathione S-transferase, C-terminal domain	Chromosome	NaN	NaN	NaN	20.7995	21.7552	NaN	21.9104	NaN	NaN	NaN	NaN	NaN	NaN	NaN	NaN	NaN	24.7117	23.6641	24.1364	24.6256	25.912	25.3678	26.5558	25.2416	23.5637	23.8241	23.8377	23.9839	24.8182	24.118	24.5854	24.9393	NaN	NaN	NaN	NaN	NaN	NaN	NaN	17.3221	NaN	NaN
A0A6N4CTC7	Aldehyde reductase	ASJ32_05335	OTHER	Cytoplasmic	C	alcohol dehydrogenase	Chromosome	25.1646	25.8655	24.8846	24.8878	25.9248	25.9639	25.9518	25.5943	25.1861	25.7945	23.4789	23.7578	25.0023	24.2041	23.6608	25.2643	24.1726	23.2257	23.6538	24.1498	25.3353	25.3151	24.6625	24.3335	23.8339	24.2244	23.4807	23.757	23.8052	23.1086	21.6686	23.6409	NaN	NaN	NaN	NaN	NaN	NaN	NaN	NaN	NaN	NaN
A0A6N4CTC9	Kinase	ASJ32_04810	OTHER	Cytoplasmic	G	PfkB domain protein	Chromosome	NaN	NaN	NaN	22.0985	NaN	NaN	NaN	NaN	23.0333	NaN	NaN	NaN	NaN	NaN	NaN	NaN	NaN	NaN	21.5932	NaN	NaN	NaN	22.5424	NaN	NaN	21.8379	21.0332	NaN	21.3548	NaN	NaN	NaN	NaN	NaN	NaN	NaN	NaN	NaN	NaN	NaN	NaN	NaN
A0A6N4CTD2	Collagenase	ASJ32_05395 GO994_19485	SP(Sec/SPI)	Extracellular	E	COG3291 FOG PKD repeat	Chromosome	23.4588	23.6213	22.6754	22.8789	22.4952	23.2199	23.2475	22.5529	20.4546	22.9636	21.168	22.9978	22.9352	22.9311	23.3033	23.8504	25.4427	24.9085	24.8029	25.559	23.7688	23.6395	23.8667	22.9474	23.7085	24.0157	24.348	24.6898	24.9569	24.6801	25.5366	25.694	18.865	18.4478	18.5166	18.4543	NaN	NaN	NaN	NaN	NaN	18.2289
A0A6N4CTD3	Uncharacterized protein	ASJ32_19455	SP(Sec/SPI)	CytoplasmicMembrane	P	NLPA lipoprotein	Chromosome	25.8271	26.3568	26.6992	25.9561	26.6709	26.826	27.0417	26.7114	24.6992	25.8806	25.2009	25.6734	25.7057	26.0845	25.3094	26.2647	22.7773	23.2187	22.6629	25.0957	23.1333	21.9296	NaN	23.0561	23.6189	NaN	23.7201	24.0663	24.0724	23.6795	23.5223	24.6728	NaN	NaN	NaN	NaN	NaN	NaN	NaN	NaN	NaN	NaN
A0A6N4CTD4	Bifunctional purine biosynthesis protein PurH [Includes: Phosphoribosylaminoimidazolecarboxamide formyltransferase (EC 2.1.2.3) (AICAR transformylase); IMP cyclohydrolase (EC 3.5.4.10) (ATIC) (IMP synthase) (Inosinicase)]	purH ASJ32_19720	OTHER	Cytoplasmic	F	Bifunctional purine biosynthesis protein PurH	Chromosome	29.9061	29.9606	29.6909	29.864	29.6478	29.8954	29.6885	29.9754	29.7997	29.9912	29.5608	29.9351	29.8575	29.7597	29.0543	30.1534	26.2273	26.982	26.0725	26.5198	25.5924	25.9162	25.9674	26.6308	26.1193	26.4543	25.8786	26.3717	26.3455	26.4921	26.379	26.4311	18.7559	20.1882	18.9208	19.12	18.4992	17.3486	18.2195	17.0349	18.3239	19.8131
A0A6N4CTD7	Uncharacterized protein	ASJ32_17960	OTHER	Unknown	S	Protein of unknown function (DUF1523)	Chromosome	NaN	NaN	NaN	NaN	NaN	NaN	NaN	NaN	NaN	NaN	NaN	NaN	NaN	NaN	NaN	NaN	26.3868	NaN	27.4724	25.3781	25.904	26.1502	25.3985	25.6295	26.8465	25.5569	27.2506	25.8585	26.6267	27.0194	26.1249	25.8765	NaN	NaN	NaN	NaN	NaN	NaN	NaN	NaN	NaN	NaN
A0A6N4CTD8	Xanthine-guanine phosphoribosyltransferase (XGPRT) (EC 2.4.2.22) (Xanthine phosphoribosyltransferase)	gpt ASJ32_04860 GO994_04650	OTHER	Cytoplasmic	F	Acts on guanine, xanthine and to a lesser extent hypoxanthine	Chromosome	27.4702	27.2641	26.9761	27.1441	27.3444	26.9411	27.2153	27.2085	27.1557	27.7596	26.7803	27.7015	26.7854	26.8538	26.3405	27.2766	22.8753	21.21	22.0498	22.714	23.1837	21.6418	21.672	22.3118	22.928	22.9225	23.0408	22.5627	21.9961	22.6128	23.4253	23.0487	NaN	NaN	NaN	NaN	NaN	NaN	NaN	NaN	NaN	NaN
A0A6N4CTD9	Bifunctional glutamine synthetase adenylyltransferase/adenylyl-removing enzyme (ATP:glutamine synthetase adenylyltransferase) (ATase) [Includes: Glutamine synthetase adenylyl-L-tyrosine phosphorylase (EC 2.7.7.89) (Adenylyl removase) (AR) (AT-N); Glutamine synthetase adenylyl transferase (EC 2.7.7.42) (Adenylyl transferase) (AT) (AT-C)]	glnE ASJ32_18355	OTHER	Cytoplasmic	H	Involved in the regulation of glutamine synthetase GlnA, a key enzyme in the process to assimilate ammonia. When cellular nitrogen levels are high, the C-terminal adenylyl transferase (AT) inactivates GlnA by covalent transfer of an adenylyl group from ATP to specific tyrosine residue of GlnA, thus reducing its activity. Conversely, when nitrogen levels are low, the N-terminal adenylyl removase (…	Chromosome	22.0148	NaN	NaN	NaN	23.6389	25.6201	22.3713	NaN	22.0503	NaN	NaN	NaN	22.2339	25.3351	NaN	NaN	24.0887	21.073	24.1105	22.4996	25.2666	23.9895	24.7415	23.4909	23.6492	23.5622	23.0474	22.1159	24.4715	24.1691	21.5235	23.3576	NaN	NaN	NaN	NaN	NaN	NaN	NaN	NaN	NaN	NaN
A0A6N4CTE0	Biopolymer transporter ExbD	ASJ32_04920	OTHER	Unknown	U	Biopolymer transport protein ExbD/TolR	Chromosome	NaN	NaN	NaN	NaN	NaN	NaN	NaN	NaN	NaN	NaN	NaN	NaN	NaN	NaN	NaN	NaN	21.3476	NaN	NaN	23.6555	24.1746	22.6558	23.2641	24.3342	NaN	NaN	NaN	NaN	21.9866	21.8634	23.1529	22.4575	NaN	NaN	NaN	NaN	NaN	NaN	NaN	NaN	NaN	NaN
A0A6N4CTE1	Aromatic amino acid transporter	ASJ32_19510	OTHER	CytoplasmicMembrane	E	Amino acid permease	Chromosome	NaN	NaN	NaN	NaN	NaN	NaN	NaN	NaN	NaN	NaN	NaN	NaN	NaN	NaN	NaN	NaN	26.0732	26.1877	25.8288	26.9023	25.3161	25.7569	24.9726	25.4638	25.0569	24.8498	25.6814	25.9909	26.5483	26.6309	26.922	26.8401	NaN	NaN	NaN	NaN	18.0876	NaN	NaN	NaN	NaN	NaN
A0A6N4CTE2	Transcriptional regulator	ASJ32_05445	OTHER	Unknown	K	Transcriptional regulator	Chromosome	NaN	NaN	NaN	NaN	NaN	NaN	NaN	NaN	NaN	NaN	NaN	NaN	NaN	NaN	NaN	NaN	24.9805	25.6009	25.1114	24.9266	24.6232	25.1465	25.1861	24.8266	25.6869	26.0427	26.8208	26.9986	25.3357	24.7576	25.1408	25.9326	NaN	NaN	NaN	NaN	NaN	NaN	NaN	NaN	NaN	NaN
A0A6N4CTE3	Sec translocon accessory complex subunit YajC	yajC ASJ32_02030 GO994_10140	OTHER	CytoplasmicMembrane	U	Preprotein translocase	Chromosome	21.3893	21.718	22.6813	22.8015	21.3987	NaN	NaN	20.7534	22.3821	21.4126	NaN	21.6976	22.2973	21.813	24.2419	21.4741	28.1502	26.2446	28.2519	28.0979	28.1922	27.8083	27.3265	27.3757	28.3479	27.8727	28.6887	27.6208	27.8794	27.5036	28.1284	27.795	NaN	NaN	NaN	NaN	NaN	NaN	NaN	NaN	NaN	NaN
A0A6N4CTE6	SAM-dependent methyltransferase	ASJ32_14405	OTHER	Cytoplasmic	J	Belongs to the class I-like SAM-binding methyltransferase superfamily. RsmB NOP family	Chromosome	26.2037	25.939	26.5112	26.5922	25.5724	24.5124	25.1062	24.6407	26.437	25.8301	27.1639	26.5199	26.491	25.9298	26.2093	25.9057	26.7962	26.0417	27.1189	26.5575	26.5746	26.519	26.4817	26.4249	27.0876	27.0042	26.6164	26.9611	26.8941	26.7262	26.3656	26.5906	17.6773	18.1812	18.1152	17.8801	NaN	NaN	NaN	NaN	NaN	18.8895
A0A6N4CTE7	Uncharacterized protein	ASJ32_18015	OTHER	Unknown	-	-	Chromosome	NaN	21.0604	20.5996	NaN	21.4181	20.8011	22.7985	21.2231	20.9559	NaN	20.9505	NaN	NaN	NaN	NaN	NaN	NaN	NaN	NaN	NaN	NaN	NaN	NaN	NaN	NaN	NaN	NaN	NaN	NaN	NaN	NaN	NaN	NaN	NaN	NaN	NaN	NaN	NaN	NaN	NaN	NaN	NaN
A0A6N4CTE8	Acetyltransferase (GNAT family N-acetyltransferase)	ASJ32_18410 GO994_03285	OTHER	Cytoplasmic	K	Acetyltransferase GNAT Family	Chromosome	NaN	NaN	NaN	NaN	NaN	NaN	NaN	NaN	NaN	NaN	NaN	NaN	NaN	NaN	NaN	NaN	21.0562	NaN	NaN	22.2698	22.2718	21.2689	22.1594	21.6465	NaN	NaN	NaN	NaN	21.2354	19.7984	21.2645	22.1269	NaN	NaN	NaN	NaN	NaN	NaN	NaN	NaN	NaN	NaN
A0A6N4CTE9	Biopolymer transporter ExbB	ASJ32_04910	SP(Sec/SPI)	CytoplasmicMembrane	U	MotA/TolQ/ExbB proton channel family	Chromosome	NaN	NaN	NaN	24.3753	24.7254	NaN	NaN	24.9933	NaN	NaN	NaN	NaN	NaN	NaN	NaN	NaN	26.5384	26.932	26.0338	27.388	28.2179	28.3179	27.8725	28.3951	23.9874	24.2367	23.7823	24.7949	26.09	26.4323	26.7704	26.9012	NaN	NaN	NaN	NaN	19.367	NaN	18.2458	NaN	NaN	NaN
A0A6N4CTF0	Aminomethyltransferase (EC 2.1.2.10) (Glycine cleavage system T protein)	gcvT ASJ32_02080	OTHER	Cytoplasmic	E	The glycine cleavage system catalyzes the degradation of glycine	Chromosome	24.8312	25.1501	25.1714	24.9777	25.1826	24.842	25.4059	25.4044	24.8506	25.6744	24.9366	25.6635	24.8755	24.5484	24.5139	25.431	NaN	NaN	NaN	NaN	NaN	NaN	NaN	NaN	NaN	NaN	NaN	NaN	NaN	NaN	NaN	NaN	NaN	NaN	NaN	NaN	NaN	NaN	NaN	NaN	NaN	NaN
A0A6N4CTF3	Nuclease SbcCD subunit D	sbcD ASJ32_19180	OTHER	Cytoplasmic	L	SbcCD cleaves DNA hairpin structures. These structures can inhibit DNA replication and are intermediates in certain DNA recombination reactions. The complex acts as a 3'- 5' double strand exonuclease that can open hairpins. It also has a 5' single-strand endonuclease activity	Chromosome	23.4691	23.9438	24.0759	24.285	24.4456	24.3379	24.0763	23.9549	23.7579	24.1458	23.6289	24.1528	24.1171	23.7312	24.6489	24.17	22.8936	24.1421	23.503	23.2073	24.4986	24.865	25.3998	25.054	22.8722	23.8559	22.865	22.8947	23.536	23.4658	22.8515	23.5089	NaN	NaN	NaN	NaN	NaN	NaN	NaN	NaN	NaN	NaN
A0A6N4CTF4	RNA pseudouridine synthase	ASJ32_17940	OTHER	Cytoplasmic	J	RNA pseudouridylate synthase	Chromosome	NaN	NaN	NaN	NaN	NaN	NaN	NaN	NaN	NaN	NaN	NaN	NaN	NaN	NaN	NaN	NaN	21.8726	NaN	21.6179	22.4649	NaN	NaN	NaN	NaN	NaN	22.0345	NaN	22.4817	NaN	NaN	21.7516	22.446	NaN	NaN	NaN	NaN	NaN	NaN	NaN	NaN	NaN	NaN
A0A6N4CTF5	Phosphatidylserine decarboxylase proenzyme (EC 4.1.1.65) [Cleaved into: Phosphatidylserine decarboxylase alpha chain; Phosphatidylserine decarboxylase beta chain]	psd ASJ32_05010	OTHER	CytoplasmicMembrane	I	Belongs to the phosphatidylserine decarboxylase family. PSD-B subfamily. Prokaryotic type I sub-subfamily	Chromosome	25.0646	24.4381	25.7839	24.9871	25.9217	24.5179	24.3369	24.521	25.0355	24.8811	25.3768	24.1576	24.459	24.4602	25.3634	23.4973	26.2123	25.799	26.2221	26.5021	25.6439	25.6184	25.7764	25.5424	26.3556	26.1096	27.2063	26.1344	25.7969	26.2984	27.0181	26.1039	NaN	NaN	NaN	NaN	NaN	NaN	NaN	NaN	NaN	NaN
A0A6N4CTF6	Cold shock domain-containing protein (Cold-shock protein)	ASJ32_04980 GO994_04500	OTHER	Cytoplasmic	K	'Cold-shock' DNA-binding domain	Chromosome	26.5271	26.2441	26.0471	24.9866	26.7884	26.2265	26.5277	25.1658	25.5635	25.7163	24.9411	23.9884	26.3284	25.7257	25.0605	24.4367	21.3133	NaN	NaN	NaN	21.2065	NaN	NaN	NaN	NaN	NaN	NaN	NaN	NaN	NaN	NaN	NaN	NaN	NaN	NaN	NaN	NaN	NaN	NaN	NaN	NaN	NaN
A0A6N4CTF8	Ribosome association toxin RatA	ASJ32_17835 GO994_07280	OTHER	Unknown	I	Oligoketide cyclase lipid transport protein	Chromosome	NaN	NaN	NaN	NaN	NaN	NaN	NaN	NaN	NaN	NaN	NaN	NaN	NaN	NaN	NaN	NaN	23.9666	NaN	23.3105	NaN	24.493	24.4744	24.502	NaN	22.4809	24.2636	24.3766	23.9691	23.3645	22.8458	22.7132	23.902	NaN	NaN	NaN	NaN	NaN	NaN	NaN	NaN	NaN	NaN
A0A6N4CTG1	Uncharacterized protein	ASJ32_03110 GO994_20505	OTHER	Cytoplasmic	-	-	Chromosome	23.6353	22.8817	22.725	21.9553	23.0405	21.2002	21.9812	21.565	22.4658	21.9409	21.7937	NaN	21.9576	22.1755	21.2126	21.6678	22.29	NaN	23.1364	21.5118	23.4184	21.5552	22.0513	21.5483	23.3527	22.0886	22.3771	22.6162	23.3947	22.9009	22.8388	22.555	NaN	NaN	NaN	NaN	NaN	NaN	NaN	NaN	NaN	NaN
A0A6N4CTG2	D-alanyl-D-alanine carboxypeptidase family protein (Peptidase M15)	ASJ32_17995 GO994_07460	OTHER	Unknown	M	D-alanyl-D-alanine carboxypeptidase	Chromosome	21.8196	22.1657	22.393	21.507	22.8186	21.6657	23.1262	NaN	21.8418	22.0206	NaN	NaN	NaN	NaN	NaN	NaN	NaN	NaN	NaN	NaN	NaN	NaN	NaN	NaN	NaN	NaN	NaN	NaN	NaN	NaN	NaN	NaN	NaN	NaN	NaN	NaN	NaN	NaN	NaN	NaN	NaN	NaN
A0A6N4CTG3	AAA family ATPase	ASJ32_19230 GO994_16535	OTHER	Cytoplasmic	S	ATPase, AAA	Chromosome	NaN	NaN	NaN	NaN	NaN	NaN	NaN	NaN	NaN	NaN	NaN	NaN	NaN	NaN	NaN	NaN	24.1184	22.2736	23.4713	24.6407	24.0262	23.4206	24.6106	24.0153	24.0029	23.3508	23.9605	24.0382	23.7418	23.8564	23.5672	24.7404	NaN	NaN	NaN	NaN	NaN	NaN	NaN	NaN	NaN	NaN
A0A6N4CTG4	Betaine-aldehyde dehydrogenase	ASJ32_05075	OTHER	Cytoplasmic	C	Aldehyde dehydrogenase family	Chromosome	NaN	21.3928	21.7877	NaN	NaN	22.1525	21.6321	22.0323	21.1648	NaN	21.3239	NaN	NaN	NaN	NaN	NaN	21.0303	NaN	NaN	NaN	21.6856	21.5537	NaN	NaN	20.8913	NaN	NaN	NaN	NaN	NaN	NaN	NaN	NaN	NaN	NaN	NaN	NaN	NaN	NaN	NaN	NaN	NaN
A0A6N4CTG7	Type IV pili twitching motility protein PilT	ASJ32_19605	OTHER	Cytoplasmic	NU	Type II/IV secretion system protein	Chromosome	NaN	NaN	NaN	NaN	NaN	NaN	NaN	NaN	NaN	NaN	NaN	NaN	NaN	NaN	NaN	NaN	23.8123	21.1111	23.3491	23.6413	23.696	22.5906	24.3643	23.7481	22.3555	22.062	23.3187	23.3239	23.7886	23.3123	21.6539	24.0863	NaN	NaN	NaN	NaN	NaN	NaN	NaN	NaN	NaN	NaN
[truncated: 1,429 more rows]
[truncated: 51 more columns]

## Sheet: CTRLQuant
Quantified proteins in the subcellular fractions of the control condition
[truncated: 2,085 more rows]

## Sheet: FeLimQuant
Quantified proteins in the subcellular fractions of the iron limitation condition
[truncated: 2,161 more rows]

## Sheet: TempQuant
Quantified proteins in the subcellular fractions of the elevated temperature condition
[truncated: 1,990 more rows]

## Sheet: ABQuant
Quantified proteins in the subcellular fractions of the antibiotic condition
[truncated: 2,028 more rows]

[truncated: 11 more sheets: Ctrl_Exclusive, FeLim_Exclusive, Temp_Exclusive, AB_Exclusive, Stress_Exclusive, FeLim_Temp_Exclusive, FeLim_AB_Exclusive, Temp_AB_Exclusive, PSORTb_Results, SignalP_Results, eggNOG_Results]
