# Supplementary material for: Effect of Iron Limitation, Elevated Temperature, and Florfenicol on the Proteome and Vesiculation of the Fish Pathogen Aeromonas salmonicida
Source: Microorganisms. 2022 Aug 27;10(9):1735. doi: 10.3390/microorganisms10091735 (PMC9503180; doi:10.3390/microorganisms10091735)
Supplement: Supplementary file 1 [file microorganisms-10-01735-s001.zip › Supplement_table_S2.xlsx]

## Sheet: Overview
Effect of iron-limitation, elevated incubation temperature and florfenicol antibiotics on the subcellular proteomes and the vesiculation of the fish pathogen Aeromonas salmonicida
Authors: Tobias Kroniger, Mina Mehanny, Rabea Schlüter, Gregor Fuhrmann, Anke Trautwein-Schult, Bernd Köllner, and Dörte Becher
Overview of supplementary table S2 content:
Sheet 1	Overview of supplementary table content
Sheet 2	Quantified proteins in the cytosol (Cyt) fraction of the control (Ctrl) condition	In this table all quantified proteins of the cytosol fraction of the control condition of the study are listed with their UniProt protein IDs, gene names, annotated UniProt protein names, the predicted PSORTb localization, the predicted SignalP output, the predicted COG category, eggNOG description and the respective results of the mass spectrometry search.
Sheet 3	Quantified proteins in the inner membrane (IM) fraction of the control (Ctrl) condition	In this table all quantified proteins of the inner membrane fraction of the control condition of the study are listed with their UniProt protein IDs, gene names, annotated UniProt protein names, the predicted PSORTb localization, the predicted SignalP output, the predicted COG category, eggNOG description and the respective results of the mass spectrometry search.
Sheet 4	Quantified proteins in the outer membrane (OM) fraction of the control (Ctrl) condition	In this table all quantified proteins of the outer membrane fraction of the control condition of the study are listed with their UniProt protein IDs, gene names, annotated UniProt protein names, the predicted PSORTb localization, the predicted SignalP output, the predicted COG category, eggNOG description and the respective results of the mass spectrometry search.
Sheet 5	Quantified proteins in the extracellular (Extra) fraction of the control (Ctrl) condition	In this table all quantified proteins of the extracellular fraction of the control condition of the study are listed with their UniProt protein IDs, gene names, annotated UniProt protein names, the predicted PSORTb localization, the predicted SignalP output, the predicted COG category, eggNOG description and the respective results of the mass spectrometry search.
Sheet 6	Quantified proteins in the outer membrane vesicle (OMV) fraction of the control (Ctrl) condition	In this table all quantified proteins of the outer membrane vesicle fraction of the control condition of the study are listed with their UniProt protein IDs, gene names, annotated UniProt protein names, the predicted PSORTb localization, the predicted SignalP output, the predicted COG category, eggNOG description and the respective results of the mass spectrometry search.
Sheet 7	Quantified proteins in the cytosol (Cyt) fraction of the iron limitation (FeLim) condition	In this table all quantified proteins of the cytosol fraction of the iron limitation condition of the study are listed with their UniProt protein IDs, gene names, annotated UniProt protein names, the predicted PSORTb localization, the predicted SignalP output, the predicted COG category, eggNOG description and the respective results of the mass spectrometry search.
Sheet 8	Quantified proteins in the inner membrane (IM) fraction of the iron limitation (FeLim) condition	In this table all quantified proteins of the inner membrane fraction of the iron limitation condition of the study are listed with their UniProt protein IDs, gene names, annotated UniProt protein names, the predicted PSORTb localization, the predicted SignalP output, the predicted COG category, eggNOG description and the respective results of the mass spectrometry search.
Sheet 9	Quantified proteins in the outer membrane (OM) fraction of the iron limitation (FeLim) condition	In this table all quantified proteins of the outer membrane fraction of the iron limitation condition of the study are listed with their UniProt protein IDs, gene names, annotated UniProt protein names, the predicted PSORTb localization, the predicted SignalP output, the predicted COG category, eggNOG description and the respective results of the mass spectrometry search.
Sheet 10	Quantified proteins in the extracellular (Extra) fraction of the iron limitation (FeLim) condition	In this table all quantified proteins of the extracellular fraction of the iron limitation condition of the study are listed with their UniProt protein IDs, gene names, annotated UniProt protein names, the predicted PSORTb localization, the predicted SignalP output, the predicted COG category, eggNOG description and the respective results of the mass spectrometry search.
Sheet 11	Quantified proteins in the outer membrane vesicle (OMV) fraction of the iron limitation (FeLim) condition	In this table all quantified proteins of the outer membrane vesicle fraction of the iron limitation condition of the study are listed with their UniProt protein IDs, gene names, annotated UniProt protein names, the predicted PSORTb localization, the predicted SignalP output, the predicted COG category, eggNOG description and the respective results of the mass spectrometry search.
Sheet 12	Quantified proteins in the cytosol (Cyt) fraction of the elevated temperature (Temp) condition	In this table all quantified proteins of the cytosol fraction of the elevated temperature condition of the study are listed with their UniProt protein IDs, gene names, annotated UniProt protein names, the predicted PSORTb localization, the predicted SignalP output, the predicted COG category, eggNOG description and the respective results of the mass spectrometry search.
Sheet 13	Quantified proteins in the inner membrane (IM) fraction of the elevated temperature (Temp) condition	In this table all quantified proteins of the inner membrane fraction of the elevated temperature condition of the study are listed with their UniProt protein IDs, gene names, annotated UniProt protein names, the predicted PSORTb localization, the predicted SignalP output, the predicted COG category, eggNOG description and the respective results of the mass spectrometry search.
Sheet 14	Quantified proteins in the outer membrane (OM) fraction of the elevated temperature (Temp) condition	In this table all quantified proteins of the outer membrane fraction of the elevated temperature condition of the study are listed with their UniProt protein IDs, gene names, annotated UniProt protein names, the predicted PSORTb localization, the predicted SignalP output, the predicted COG category, eggNOG description and the respective results of the mass spectrometry search.
Sheet 15	Quantified proteins in the extracellular (Extra) fraction of the elevated temperature (Temp) condition	In this table all quantified proteins of the extracellular fraction of the elevated temperature condition of the study are listed with their UniProt protein IDs, gene names, annotated UniProt protein names, the predicted PSORTb localization, the predicted SignalP output, the predicted COG category, eggNOG description and the respective results of the mass spectrometry search.
Sheet 16	Quantified proteins in the outer membrane vesicle (OMV) fraction of the elevated temperature (Temp) condition	In this table all quantified proteins of the outer membrane vesicle fraction of the elevated temperature condition of the study are listed with their UniProt protein IDs, gene names, annotated UniProt protein names, the predicted PSORTb localization, the predicted SignalP output, the predicted COG category, eggNOG description and the respective results of the mass spectrometry search.
Sheet 17	Quantified proteins in the cytosol (Cyt) fraction of the antibiotic (AB) condition	In this table all quantified proteins of the cytosol fraction of the antibiotic condition of the study are listed with their UniProt protein IDs, gene names, annotated UniProt protein names, the predicted PSORTb localization, the predicted SignalP output, the predicted COG category, eggNOG description and the respective results of the mass spectrometry search.
Sheet 18	Quantified proteins in the inner membrane (IM) fraction of the antibiotic (AB) condition	In this table all quantified proteins of the inner membrane fraction of the antibiotic condition of the study are listed with their UniProt protein IDs, gene names, annotated UniProt protein names, the predicted PSORTb localization, the predicted SignalP output, the predicted COG category, eggNOG description and the respective results of the mass spectrometry search.
Sheet 19	Quantified proteins in the outer membrane (OM) fraction of the antibiotic (AB) condition	In this table all quantified proteins of the outer membrane fraction of the antibiotic condition of the study are listed with their UniProt protein IDs, gene names, annotated UniProt protein names, the predicted PSORTb localization, the predicted SignalP output, the predicted COG category, eggNOG description and the respective results of the mass spectrometry search.
Sheet 20	Quantified proteins in the extracellular (Extra) fraction of the antibiotic (AB) condition	In this table all quantified proteins of the extracellular fraction of the antibiotic condition of the study are listed with their UniProt protein IDs, gene names, annotated UniProt protein names, the predicted PSORTb localization, the predicted SignalP output, the predicted COG category, eggNOG description and the respective results of the mass spectrometry search.
Sheet 21	Quantified proteins in the outer membrane vesicle (OMV) fraction of the antibiotic (AB) condition	In this table all quantified proteins of the outer membrane vesicle fraction of the antibiotic condition of the study are listed with their UniProt protein IDs, gene names, annotated UniProt protein names, the predicted PSORTb localization, the predicted SignalP output, the predicted COG category, eggNOG description and the respective results of the mass spectrometry search.

## Sheet: Quant_Ctrl_Cyt
Quantified proteins in the cytosol fraction of the control condition
In this table all identified proteins of the control condition of the study are listed with their UniProt protein IDs, gene names, annotated UniProt protein names, the predicted PSORTb localization, the predicted SignalP output, the predicted COG category, eggNOG description and the respective results of the mass spectrometry search. Further, log2 transformed LFQ intensities of identified protein…
Majority protein IDs	Protein Name	Gene names	SignalP	PSORTb	COG Category	eggNOG description	Encoded by	LFQ intensity Ctrl1_Cyt log2	LFQ intensity Ctrl2_Cyt log2	LFQ intensity Ctrl3_Cyt log2	LFQ intensity Ctrl4_Cyt log2	Peptides	Razor + unique peptides	Unique peptides	Sequence coverage [%]	Unique + razor sequence coverage [%]	Unique sequence coverage [%]	Mol. weight [kDa]	Q-value	Score	Intensity	MS/MS count	Protein IDs	Majority protein IDs
A0A0K0MDT1	Non-ribosomal peptide synthetase (Peptide synthetase)	amoF ASJ32_11185	OTHER	CytoplasmicMembrane	Q	COG1020 Non-ribosomal peptide synthetase modules and related proteins	Chromosome	23.3189	22.6046	22.9657	22.4524	88	88	88	66	66	66	111.43	0	323.31	28878000000	3277	A0A0K0MDT1	A0A0K0MDT1
A0A0K0MDU1	ABC transporter substrate-binding protein (Amonabactin ABC transporter substrate-binding protein)	ASJ32_11165 GO994_14085	SP(Sec/SPI)	Periplasmic	P	Periplasmic binding protein	Chromosome	21.2151	22.1074	22.0073	21.3433	20	20	20	41.7	41.7	41.7	33.621	0	323.31	589950000	258	A0A0K0MDU1	A0A0K0MDU1
A0A0X1L5K6	MobC (Mobilization protein)	mobC ASJ32_22495	OTHER	Unknown	S	Bacterial mobilisation protein (MobC)	Plasmid pAsal1C; Plasmid pAsal1D	23.838	22.7758	24.3329	24.7438	13	11	7	87.7	87.7	55.8	15.162	0	323.31	834890000	571	A0A0X1L5K6	A0A0X1L5K6
A0A151KDW8	Mobilization protein	ASJ32_22395 UC37_22540	OTHER	Unknown	S	Bacterial mobilisation protein (MobC)	Plasmid pAsa1	24.3257	23.5071	25.2961	25.2089	14	14	12	86.8	86.8	79.4	14.868	0	323.31	1728700000	685	A0A151KDW8	A0A151KDW8
A0A151KED4	Uncharacterized protein	ASJ32_22405 UC37_22550	OTHER	Unknown	-	/	Plasmid pAsa1	23.7733	23.8349	24.0568	24.154	10	10	10	86.7	86.7	86.7	12.675	0	323.31	142220000	126	A0A151KED4	A0A151KED4
A0A151KEJ1	Uncharacterized protein	ASJ32_22425 UC37_22585	OTHER	Unknown	-	/	Plasmid pAsa2	24.8517	25.4522	25.7736	25.3915	10	10	10	75.2	75.2	75.2	11.236	0	60.722	561140000	201	A0A151KEJ1	A0A151KEJ1
A0A1Q4MBA1	Mobile element protein (Transposase)	ASJ32_22800 ASJ32_22820	OTHER	Unknown	L	Transposase and inactivated derivatives	Plasmid pAsa5	22.2132	22.0107	21.0505	NaN	12	12	5	87.6	87.6	38.1	11.132	0	63.851	139430000	122	A0A1Q4MBA1;A0A6N4CQW2;A0A6N4CQG6;A0A6N4CV07	A0A1Q4MBA1;A0A6N4CQW2;A0A6N4CQG6;A0A6N4CV07
A0A1Q4MBX9	Protein-tyrosine-phosphatase (EC 3.1.3.48)	aopH ASJ32_22565	OTHER	Extracellular	T	Protein tyrosine phosphatase, catalytic domain	Plasmid pAsa5	24.8002	24.455	23.5692	24.7028	33	33	33	66.5	66.5	66.5	50.413	0	323.31	625530000	461	A0A1Q4MBX9	A0A1Q4MBX9
A0A1Q4MCG7	DNA-binding protein	ASJ32_22130	OTHER	Cytoplasmic	L	Belongs to the histone-like protein H-NS family	Plasmid pAsa5	26.7614	26.6486	26.7107	28.4386	19	7	7	89	40.4	40.4	14.951	0	140.41	1759500000	176	A0A1Q4MCG7	A0A1Q4MCG7
A0A1Q4MCH7	Uncharacterized protein	ASJ32_22120	OTHER	Unknown	-	/	Plasmid pAsa5	24.3399	24.5445	23.8198	23.2121	14	14	14	60.3	60.3	60.3	15.993	0	323.31	792730000	344	A0A1Q4MCH7	A0A1Q4MCH7
A0A1Q4MCI1	KfrA protein	kfrA ASJ32_21920	OTHER	Cytoplasmic	S	Plasmid replication region DNA-binding N-term	Plasmid pAsa5	24.7599	24.6157	25.4285	25.099	27	27	27	66.2	66.2	66.2	37.2	0	323.31	770520000	363	A0A1Q4MCI1	A0A1Q4MCI1
A0A1Q4MCJ6	NYN-domain containing protein	ASJ32_21925	OTHER	Cytoplasmic	S	NYN domain	Plasmid pAsa5	22.3702	23.0726	22.8654	22.6287	25	25	25	74.2	74.2	74.2	27.28	0	263.95	834470000	465	A0A1Q4MCJ6	A0A1Q4MCJ6
A0A1Q4MD05	AAA family ATPase (Chromosome partitioning protein ParA) (Partitioning protein ParA)	parA ASJ32_22625 GO994_22695	OTHER	Cytoplasmic	-	/	Plasmid p1AsJ410; Plasmid p1asj410; Plasmid pAsa5	23.6518	23.3704	24.0004	24.7237	29	29	29	100	100	100	21.038	0	323.31	7404300000	1421	A0A1Q4MD05	A0A1Q4MD05
A0A1Q4MD10	Hydrolase	ASJ32_21765	OTHER	CytoplasmicMembrane	S	Domain of unknown function (DUF1705)	Plasmid pAsa5	21.581	20.9977	22.6432	22.6764	56	42	42	59.4	54.4	54.4	61.945	0	323.31	8417500000	2187	A0A1Q4MD10	A0A1Q4MD10
A0A1Q4MD13	Hydrolase	ASJ32_21770	OTHER	CytoplasmicMembrane	S	Domain of unknown function (DUF1705)	Plasmid pAsa5	21.8531	21.7208	22.9493	23.3907	58	58	44	56.6	56.6	54.3	61.646	0	323.31	26940000000	6573	A0A1Q4MD13	A0A1Q4MD13
A0A1Q4MD26	Uncharacterized protein	ASJ32_21560	OTHER	Unknown	-	-	Plasmid pAsa5	22.7868	21.8219	22.6217	23.4551	10	10	10	77.7	77.7	77.7	10.615	0	114.06	273870000	114	A0A1Q4MD26	A0A1Q4MD26
A0A1Q4MD37	Methionine repressor-like protein (Programmed cell death antitoxin YdcD)	ydcD ASJ32_21535	OTHER	Unknown	S	Ribbon-helix-helix domain	Plasmid pAsa5	19.4741	NaN	20.4166	22.7506	4	4	4	73.4	73.4	73.4	7.0308	0	46.158	34215000	52	A0A1Q4MD37	A0A1Q4MD37
A0A1Q4MD40	Chromosome partitioning protein ParA (Partitioning protein ParA)	parA ASJ32_21565	OTHER	Cytoplasmic	D	Cellulose biosynthesis protein BcsQ	Plasmid pAsa5	22.189	22.3481	NaN	22.8139	20	20	20	56.7	56.7	56.7	29.908	0	323.31	1832400000	520	A0A1Q4MD40	A0A1Q4MD40
A0A1Q4MD41	Uncharacterized protein	ASJ32_21585	OTHER	Unknown	-	-	Plasmid pAsa5	24.8452	25.0148	25.8817	25.3815	24	24	24	81.2	81.2	81.2	34.409	0	227.65	396800000	243	A0A1Q4MD41	A0A1Q4MD41
A0A1Q4MD46	Resolvase	ASJ32_21530	OTHER	Cytoplasmic	L	Resolvase, N terminal domain	Plasmid pAsa5	21.1386	21.3351	NaN	23.2002	24	24	24	64.6	64.6	64.6	34.306	0	323.31	2445100000	703	A0A1Q4MD46	A0A1Q4MD46
A0A1Q4MF46	Uncharacterized protein	ASJ32_20375	OTHER	Unknown	-	-	Plasmid pAsa5	27.355	26.7869	28.1047	28.6278	12	12	12	80.2	80.2	80.2	11.346	0	193.77	984170000	266	A0A1Q4MF46	A0A1Q4MF46
A0A1Q4MF68	Cobyrinic acid ac-diamide synthase (Partitioning protein ParA)	parA ASJ32_20370	OTHER	Cytoplasmic	D	COG1192 ATPases involved in chromosome partitioning	Plasmid pAsa5	23.7609	23.2638	23.3098	22.8031	22	22	22	84.7	84.7	84.7	23.261	0	323.31	951350000	729	A0A1Q4MF68	A0A1Q4MF68
A0A1Q4MF72	Plasmid replication protein RepB	ASJ32_20365	OTHER	Unknown	-	/	Plasmid pAsa5	23.827	22.9745	24.0195	23.0913	13	13	13	91	91	91	8.8882	0	113.82	178460000	141	A0A1Q4MF72	A0A1Q4MF72
A0A1Q4MF77	DNA repair protein (DNA repair protein RadC)	ASJ32_21255	OTHER	Cytoplasmic	L	Belongs to the UPF0758 family	Plasmid pAsa5	23.8482	23.5052	25.0138	24.126	9	9	4	63.3	63.3	32.5	13.876	0.0004386	28.294	331020000	141	A0A1Q4MF77	A0A1Q4MF77
A0A1Q4MF78	Ribonuclease VapC (RNase VapC) (EC 3.1.-.-) (Toxin VapC)	vapC ASJ32_21275 GO994_12350	OTHER	Unknown	S	Toxic component of a toxin-antitoxin (TA) module. An RNase	Plasmid pAsa5	25.495	25.4061	25.7428	24.7778	9	9	9	79.6	79.6	79.6	14.967	0	130.89	963160000	286	A0A1Q4MF78	A0A1Q4MF78
A0A1Q4MF96	Uncharacterized protein	ASJ32_21290	OTHER	Unknown	-	/	Plasmid pAsa5	21.3428	20.7078	NaN	21.6687	3	3	3	58.8	58.8	58.8	11.633	0.00039667	10.15	53627000	62	A0A1Q4MF96	A0A1Q4MF96
A0A1Z3MNE9	Uncharacterized protein	ASJ32_21945	OTHER	Unknown	-	/	Plasmid pAsa5	21.8658	NaN	21.2374	21.7204	7	7	7	64.8	64.8	64.8	14.269	0.00043141	24.692	64644000	72	A0A1Z3MNE9	A0A1Z3MNE9
A0A6N4CL31	L,D-transpeptidase family protein (Peptidoglycan-binding protein)	ASJ32_07915 GO994_15905	SP(Sec/SPI)	Unknown	M	L,D-transpeptidase catalytic domain	Chromosome	25.5224	25.6481	25.7049	24.0933	24	24	24	73.8	73.8	73.8	33.116	0	170.81	1372600000	643	A0A6N4CL31	A0A6N4CL31
A0A6N4CL37	Uncharacterized protein	ASJ32_07965	LIPO(Sec/SPII)	Unknown	S	Bacterial protein of unknown function (DUF945)	Chromosome	20.6513	21.5212	21.5885	NaN	39	39	39	93.3	93.3	93.3	45.648	0	323.31	5085700000	1934	A0A6N4CL37	A0A6N4CL37
A0A6N4CL49	Helix-turn-helix domain-containing protein (XRE family transcriptional regulator)	ASJ32_08070 GO994_15235	OTHER	Unknown	K	Helix-turn-helix	Chromosome	25.7698	25.2945	26.8714	26.5041	14	14	13	69.3	69.3	69.3	9.6472	0	310.59	2806200000	1048	A0A6N4CL49	A0A6N4CL49
A0A6N4CLD2	50S ribosomal protein L11	rplK ASJ32_07335 GO994_01660	OTHER	Cytoplasmic	J	Forms part of the ribosomal stalk which helps the ribosome interact with GTP-bound translation factors	Chromosome	31.1342	31.0081	30.8716	31.8572	30	30	30	91.5	91.5	91.5	14.989	0	323.31	94903000000	9950	A0A6N4CLD2	A0A6N4CLD2
A0A6N4CLD9	Response regulator (Response regulator GlrR)	ASJ32_07450 GO994_01540	OTHER	Cytoplasmic	T	Sigma-54 interaction domain	Chromosome	23.268	22.4043	23.2065	22.9271	30	30	30	78.9	78.9	78.9	46.695	0	323.31	445340000	392	A0A6N4CLD9	A0A6N4CLD9
A0A6N4CLF6	Putrescine-binding periplasmic protein	ASJ32_07840 GO994_20800	SP(Sec/SPI)	Periplasmic	P	Required for the activity of the bacterial periplasmic transport system of putrescine	Chromosome	27.6166	27.7478	26.9785	26.6259	32	32	32	72.9	72.9	72.9	40.033	0	323.31	10283000000	2680	A0A6N4CLF6	A0A6N4CLF6
A0A6N4CLG5	UDP-N-acetylglucosamine 4,6-dehydratase (Inverting)	ASJ32_07895	OTHER	Unknown	M	Polysaccharide biosynthesis protein	Chromosome	21.6393	21.404	22.909	22.6339	37	37	37	79	79	79	37.302	0	323.31	1698200000	855	A0A6N4CLG5	A0A6N4CLG5
A0A6N4CLI6	Uncharacterized protein	ASJ32_21985 GO994_21975	LIPO(Sec/SPII)	Unknown	G	Modulates cellular lipopolysaccharide (LPS) levels by regulating LpxC, which is involved in lipid A biosynthesis. May act by modulating the proteolytic activity of FtsH towards LpxC. May also coordinate assembly of proteins involved in LPS synthesis at the plasma membrane	Chromosome	21.2167	21.2223	23.655	22.1932	41	41	41	85.7	85.7	85.7	44.183	0	323.31	2338600000	768	A0A6N4CLI6	A0A6N4CLI6
A0A6N4CLJ6	Damage-inducible protein I (DinI-like family protein)	ASJ32_06655 GO994_10770	OTHER	Unknown	S	damage-inducible protein I	Chromosome	22.7474	22.8091	23.1439	24.0882	5	5	5	89	89	89	9.2786	0	32.151	127860000	102	A0A6N4CLJ6	A0A6N4CLJ6
A0A6N4CLK8	Formate C-acetyltransferase (EC 2.3.1.54)	pflB ASJ32_06760 GO994_10875	OTHER	Cytoplasmic	C	Pyruvate formate lyase-like	Chromosome	27.5539	27.7846	27.8812	27.4501	100	100	99	93.8	93.8	92.9	85.135	0	323.31	17018000000	5028	A0A6N4CLK8	A0A6N4CLK8
A0A6N4CLN5	Serine/threonine protein kinase	ASJ32_07025	OTHER	Cytoplasmic	T	serine protein kinase	Chromosome	23.1029	22.1835	22.3967	23.0081	49	49	49	65.5	65.5	65.5	74.044	0	323.31	1928300000	964	A0A6N4CLN5	A0A6N4CLN5
A0A6N4CLP8	Uncharacterized protein	ASJ32_07180 GO994_11150	OTHER	Cytoplasmic	-	-	Chromosome	24.3064	25.378	23.847	24.221	15	15	15	60.1	60.1	60.1	30.688	0	107.36	571860000	186	A0A6N4CLP8	A0A6N4CLP8
A0A6N4CLQ7	UPF0502 protein ASJ32_21790	ASJ32_21790 GO994_15075	OTHER	Cytoplasmic	S	Belongs to the UPF0502 family	Chromosome	27.1174	27.1018	27.6438	27.1723	25	25	25	81.1	81.1	81.1	24.041	0	323.31	3326500000	696	A0A6N4CLQ7	A0A6N4CLQ7
A0A6N4CLT7	High frequency lysogenization protein HflD homolog	hflD ASJ32_21505	OTHER	Unknown	S	High frequency lysogenization protein HflD homolog	Chromosome	22.3683	22.4384	23.1168	22.5749	27	27	27	96.6	96.6	96.6	22.846	0	323.31	1227400000	441	A0A6N4CLT7	A0A6N4CLT7
A0A6N4CM06	Cell shape-determining protein MreB	mreB ASJ32_06290 GO994_02860	OTHER	Cytoplasmic	D	Rod shape-determining protein MreB	Chromosome	25.2844	25.0664	24.7609	25.5312	37	37	37	83.2	83.2	83.2	37.029	0	323.31	30173000000	4767	A0A6N4CM06	A0A6N4CM06
A0A6N4CM39	Uncharacterized protein	ASJ32_06625	SP(Sec/SPI)	Periplasmic	-	-	Chromosome	23.4822	22.6025	22.9482	22.366	8	8	8	44.8	44.8	44.8	12.624	0	213.97	137780000	130	A0A6N4CM39	A0A6N4CM39
A0A6N4CM52	Alkyl hydroperoxide reductase C (Peroxiredoxin) (Thioredoxin peroxidase)	ASJ32_21080	OTHER	Cytoplasmic	O	Alkyl hydroperoxide reductase	Chromosome	24.6306	24.8223	24.3858	23.6293	15	15	15	65.5	65.5	65.5	22.06	0	131.67	604040000	292	A0A6N4CM52	A0A6N4CM52
A0A6N4CM57	Threonylcarbamoyl-AMP synthase	ASJ32_20980 GO994_15840	OTHER	Cytoplasmic	J	Belongs to the SUA5 family	Chromosome	23.9989	23.6271	23.4383	23.0377	18	18	18	67.5	67.5	67.5	22.765	0	138.76	614870000	304	A0A6N4CM57	A0A6N4CM57
A0A6N4CM73	tRNA-dihydrouridine synthase B (EC 1.3.1.-)	dusB ASJ32_20730 GO994_04225	OTHER	Cytoplasmic	H	Catalyzes the synthesis of 5,6-dihydrouridine (D), a modified base found in the D-loop of most tRNAs, via the reduction of the C5-C6 double bond in target uridines	Chromosome	21.9581	22.0573	21.8574	22.6903	31	31	31	90	90	90	35.585	0	323.31	1276900000	728	A0A6N4CM73	A0A6N4CM73
A0A6N4CM94	Uncharacterized protein	ASJ32_20510	OTHER	Unknown	S	Protein of unknown function (DUF1349)	Chromosome	21.6247	22.3357	22.5619	20.4875	11	11	11	66.8	66.8	66.8	22.263	0	323.31	213410000	260	A0A6N4CM94	A0A6N4CM94
A0A6N4CMA2	NAD-dependent succinate-semialdehyde dehydrogenase (EC 1.2.1.16)	gabD ASJ32_20560	OTHER	Cytoplasmic	C	Belongs to the aldehyde dehydrogenase family	Chromosome	24.2407	24.6329	25.9238	25.1234	27	27	27	64.7	64.7	64.7	51.59	0	323.31	609850000	373	A0A6N4CMA2	A0A6N4CMA2
A0A6N4CMF0	Ion-translocating oxidoreductase complex subunit C (EC 7.-.-.-) (Rnf electron transport complex subunit C)	rnfC ASJ32_20090	OTHER	Cytoplasmic	C	Part of a membrane complex involved in electron transport	Chromosome	23.7063	23.5594	23.7749	24.3813	58	58	58	67.5	67.5	67.5	79.865	0	323.31	3546600000	2772	A0A6N4CMF0	A0A6N4CMF0
A0A6N4CMF1	S-protein secretion protein E (Type II/IV secretion system protein)	ASJ32_19880 GO994_15760	OTHER	Cytoplasmic	NU	Type II/IV secretion system protein	Chromosome	24.3483	NaN	25.6114	22.2537	46	46	45	64.5	64.5	63.4	61.819	0	323.31	4152800000	1324	A0A6N4CMF1	A0A6N4CMF1
A0A6N4CMG2	Uncharacterized protein	ASJ32_05190	OTHER	Cytoplasmic	S	Protein of unknown function, DUF484	Chromosome	23.7033	22.0702	NaN	22.7198	22	22	22	77	77	77	26.016	0	312.79	837890000	299	A0A6N4CMG2	A0A6N4CMG2
A0A6N4CML3	Bifunctional aspartokinase/homoserine dehydrogenase [Includes: Aspartokinase (EC 2.7.2.4); Homoserine dehydrogenase (EC 1.1.1.3)]	ASJ32_05765	OTHER	CytoplasmicMembrane	E	homoserine dehydrogenase	Chromosome	22.277	20.8166	22.1908	23.4589	65	64	64	61.2	60.3	60.3	90.039	0	323.31	8946500000	2334	A0A6N4CML3	A0A6N4CML3
A0A6N4CMP8	Aspartate ammonia-lyase (Aspartase) (EC 4.3.1.1)	aspA ASJ32_19800 GO994_04145	OTHER	Cytoplasmic	E	Aspartate ammonia-lyase	Chromosome	24.537	24.637	25.5939	24.6013	37	37	37	63.5	63.5	63.5	52.544	0	323.31	1300500000	757	A0A6N4CMP8	A0A6N4CMP8
A0A6N4CMQ0	Uncharacterized protein	ASJ32_19760	LIPO(Sec/SPII)	Unknown	-	/	Chromosome	24.1272	23.173	24.7222	24.6384	11	11	11	75.3	75.3	75.3	7.7997	0	323.31	7637100000	888	A0A6N4CMQ0	A0A6N4CMQ0
A0A6N4CMR2	Cysteine--tRNA ligase (EC 6.1.1.16) (Cysteinyl-tRNA synthetase) (CysRS)	cysS ASJ32_09320 GO994_14575	OTHER	Cytoplasmic	J	Belongs to the class-I aminoacyl-tRNA synthetase family	Chromosome	26.0097	25.6906	25.9391	25.501	42	42	42	73.4	73.4	73.4	51.309	0	323.31	6150000000	2422	A0A6N4CMR2	A0A6N4CMR2
A0A6N4CMS1	Sulfurtransferase (EC 2.8.1.-)	tusE ASJ32_19410 GO994_13455	OTHER	Cytoplasmic	P	Part of a sulfur-relay system	Chromosome	20.8603	20.5824	NaN	21.4038	7	7	7	57.5	57.5	57.5	12.833	0.00041615	17.959	18338000	39	A0A6N4CMS1	A0A6N4CMS1
A0A6N4CMT4	UPF0313 protein ASJ32_08035	ASJ32_08035	OTHER	Cytoplasmic	C	Domain of unknown function (DUF3362)	Chromosome	23.4504	22.2452	22.4675	23.3386	75	75	75	89.9	89.9	89.9	88.47	0	323.31	2099800000	1464	A0A6N4CMT4	A0A6N4CMT4
A0A6N4CMT8	Exonuclease SbcC	ASJ32_19185	OTHER	Cytoplasmic	L	Putative exonuclease SbcCD, C subunit	Chromosome	24.7358	23.5563	24.6918	25.7812	126	126	126	75.4	75.4	75.4	141.23	0	323.31	6269700000	2405	A0A6N4CMT8	A0A6N4CMT8
A0A6N4CMX0	tRNA (cytidine(34)-2'-O)-methyltransferase (EC 2.1.1.207) (tRNA (cytidine/uridine-2'-O-)-methyltransferase TrmL)	trmL ASJ32_19085	OTHER	Unknown	J	Methylates the ribose at the nucleotide 34 wobble position in the two leucyl isoacceptors tRNA(Leu)(CmAA) and tRNA(Leu)(cmnm5UmAA). Catalyzes the methyl transfer from S- adenosyl-L-methionine to the 2'-OH of the wobble nucleotide	Chromosome	24.2055	23.6412	23.066	23.0976	12	12	12	87	87	87	17.354	0	164.24	311220000	158	A0A6N4CMX0	A0A6N4CMX0
A0A6N4CMZ7	Uroporphyrinogen decarboxylase (UPD) (URO-D) (EC 4.1.1.37)	hemE ASJ32_18545	OTHER	Cytoplasmic	H	Catalyzes the decarboxylation of four acetate groups of uroporphyrinogen-III to yield coproporphyrinogen-III	Chromosome	24.2976	25.0174	24.5028	24.3903	21	21	21	67.6	67.6	67.6	39.49	0	323.31	1159300000	554	A0A6N4CMZ7	A0A6N4CMZ7
A0A6N4CMZ9	3-methyl-2-oxobutanoate hydroxymethyltransferase (EC 2.1.2.11) (Ketopantoate hydroxymethyltransferase) (KPHMT)	panB ASJ32_18595 GO994_17805	OTHER	Unknown	H	Catalyzes the reversible reaction in which hydroxymethyl group from 5,10-methylenetetrahydrofolate is transferred onto alpha-ketoisovalerate to form ketopantoate	Chromosome	27.1904	27.9205	27.7087	27.0833	23	23	23	84.8	84.8	84.8	28.551	0	323.31	7364200000	2462	A0A6N4CMZ9	A0A6N4CMZ9
A0A6N4CN11	NAD(+) diphosphatase (EC 3.6.1.22)	nudC ASJ32_18540	OTHER	Cytoplasmic	L	NADH pyrophosphatase zinc ribbon domain	Chromosome	22.3291	21.2571	22.8606	21.6158	15	15	15	60.6	60.6	60.6	29.075	0	137.94	298880000	206	A0A6N4CN11	A0A6N4CN11
A0A6N4CN12	Uncharacterized protein	ASJ32_07305	OTHER	Cytoplasmic	S	YheO-like PAS domain	Chromosome	25.7493	24.9374	24.8324	26.2702	21	21	21	81.9	81.9	81.9	26.914	0	323.31	3743000000	1198	A0A6N4CN12	A0A6N4CN12
A0A6N4CN14	Acyltransferase	ASJ32_18225	OTHER	Cytoplasmic	I	Phosphate acyltransferases	Chromosome	22.42	22.6888	22.7177	22.9593	40	40	40	79.9	79.9	79.9	41.707	0	323.31	3282200000	1128	A0A6N4CN14	A0A6N4CN14
A0A6N4CN23	Response regulator (Two-component system response regulator)	ASJ32_07420 GO994_01575	OTHER	Cytoplasmic	KT	Transcriptional regulatory protein, C terminal	Chromosome	23.356	23.2191	22.72	23.3987	24	24	24	79.4	79.4	79.4	24.194	0	323.31	670050000	390	A0A6N4CN23	A0A6N4CN23
A0A6N4CN35	UPF0597 protein ASJ32_07525	ASJ32_07525	OTHER	Cytoplasmic	S	Belongs to the UPF0597 family	Chromosome	22.3723	21.714	22.6577	22.8444	25	25	25	52.2	52.2	52.2	45.609	0	323.31	1153900000	489	A0A6N4CN35	A0A6N4CN35
A0A6N4CN50	Hyaluronidase	ASJ32_17985	OTHER	Cytoplasmic	G	beta-N-acetylglucosaminidase	Chromosome	22.0709	22.381	20.3344	20.8808	20	20	20	54.2	54.2	54.2	41.611	0	140.39	187140000	211	A0A6N4CN50	A0A6N4CN50
A0A6N4CN61	Uncharacterized protein	ASJ32_07860 GO994_20780	SP(Sec/SPI)	Unknown	ET	ABC-type amino acid transport signal transduction systems periplasmic component domain	Chromosome	22.0288	21.6712	21.1591	NaN	16	16	16	44.7	44.7	44.7	32.414	0	90.287	89346000	114	A0A6N4CN61	A0A6N4CN61
A0A6N4CN63	Uncharacterized protein	ASJ32_18100 GO994_07580	SP(Sec/SPI)	Unknown	-	/	Chromosome	24.4124	24.6821	25.0577	24.6712	26	26	26	68.9	68.9	68.9	21.204	0	323.31	1468300000	1129	A0A6N4CN63	A0A6N4CN63
A0A6N4CN77	ATP-binding cassette domain-containing protein (Methionine ABC transporter ATP-binding protein)	ASJ32_17555 GO994_03750	OTHER	CytoplasmicMembrane	V	ABC transporter, ATP-binding protein	Chromosome	23.1643	22.8488	23.4453	24.984	18	18	18	80.3	80.3	80.3	25.071	0	323.31	7485400000	1099	A0A6N4CN77	A0A6N4CN77
A0A6N4CN89	RNA polymerase sigma factor	ASJ32_17655	OTHER	Cytoplasmic	K	Belongs to the sigma-70 factor family. ECF subfamily	Chromosome	23.5011	23.7573	24.6826	23.8707	20	20	20	92.7	92.7	92.7	21.868	0	323.31	537940000	337	A0A6N4CN89	A0A6N4CN89
A0A6N4CNB7	Ribosome-binding factor A	rbfA ASJ32_04255 GO994_05275	OTHER	Cytoplasmic	J	One of several proteins that assist in the late maturation steps of the functional core of the 30S ribosomal subunit. Associates with free 30S ribosomal subunits (but not with 30S subunits that are part of 70S ribosomes or polysomes). Required for efficient processing of 16S rRNA. May interact with the 5'-terminal helix region of 16S rRNA	Chromosome	24.645	24.5859	25.1666	25.433	16	16	16	80.6	80.6	80.6	16.368	0	323.31	5568100000	1239	A0A6N4CNB7	A0A6N4CNB7
A0A6N4CNB8	Bifunctional NAD pyrophosphatase/5'-nucleotidase (Bifunctional metallophosphatase/5'-nucleotidase)	ASJ32_06675 GO994_10790	OTHER	Unknown	F	Belongs to the 5'-nucleotidase family	Chromosome	23.9624	24.2433	23.1374	23.4788	20	20	20	48.8	48.8	48.8	60.321	0	323.31	781990000	547	A0A6N4CNB8	A0A6N4CNB8
A0A6N4CND0	Peptidase M16	ASJ32_06780	SP(Sec/SPI)	CytoplasmicMembrane	S	Insulinase (Peptidase family M16)	Chromosome	23.5812	23.3836	24.6279	23.875	45	45	45	59.6	59.6	59.6	103.77	0	323.31	457130000	451	A0A6N4CND0	A0A6N4CND0
A0A6N4CND1	Cytochrome C	ASJ32_04375	SP(Sec/SPI)	Periplasmic	E	Bacterial extracellular solute-binding proteins, family 5 Middle	Chromosome	28.4988	28.633	28.3087	28.1422	72	72	72	89.2	89.2	89.2	57.296	0	323.31	30549000000	8626	A0A6N4CND1	A0A6N4CND1
A0A6N4CNF2	Ribosomal protein L11 methyltransferase (L11 Mtase) (EC 2.1.1.-)	prmA ASJ32_04530 GO994_05010	OTHER	Cytoplasmic	J	Methylates ribosomal protein L11	Chromosome	23.6747	22.4865	22.3838	22.3195	8	8	8	40.1	40.1	40.1	31.77	0	190.91	546480000	242	A0A6N4CNF2	A0A6N4CNF2
A0A6N4CNI2	ATP-dependent RNA helicase RhlE	ASJ32_07200	OTHER	Cytoplasmic	L	DEAD-box RNA helicase involved in ribosome assembly. Has RNA-dependent ATPase activity and unwinds double-stranded RNA	Chromosome	24.1964	23.2699	23.6065	25.8172	49	47	47	83.2	81	81	50.826	0	323.31	9099600000	2336	A0A6N4CNI2	A0A6N4CNI2
A0A6N4CNJ0	ATP-dependent endonuclease (DUF2813 domain-containing protein)	ASJ32_07250 GO994_11220	OTHER	Cytoplasmic	L	Protein of unknown function (DUF2813)	Chromosome	20.1689	21.7368	22.7469	20.1841	22	22	22	47	47	47	61.478	0	323.31	101450000	138	A0A6N4CNJ0	A0A6N4CNJ0
A0A6N4CNJ3	Esterase FrsA (EC 3.1.1.1)	frsA ASJ32_04855	OTHER	Cytoplasmic	S	Belongs to the UPF0255 family	Chromosome	23.322	23.1581	21.2323	23.0678	33	33	33	63	63	63	47.504	0	323.31	950100000	576	A0A6N4CNJ3	A0A6N4CNJ3
A0A6N4CNK1	Uncharacterized protein	ASJ32_04905	SP(Sec/SPI)	Unknown	D	Protein of unknown function (DUF3450)	Chromosome	23.4648	23.674	24.9918	24.4381	38	38	38	81.9	81.9	81.9	28.148	0	323.31	3186900000	1221	A0A6N4CNK1	A0A6N4CNK1
A0A6N4CNL2	N5-carboxyaminoimidazole ribonucleotide synthase (N5-CAIR synthase) (EC 6.3.4.18) (5-(carboxyamino)imidazole ribonucleotide synthetase)	purK ASJ32_21635	OTHER	CytoplasmicMembrane	F	Catalyzes the ATP-dependent conversion of 5- aminoimidazole ribonucleotide (AIR) and HCO(3)(-) to N5- carboxyaminoimidazole ribonucleotide (N5-CAIR)	Chromosome	26.2659	26.6736	24.8119	26.035	24	24	24	74.1	74.1	74.1	39.991	0	313.04	2610700000	636	A0A6N4CNL2	A0A6N4CNL2
A0A6N4CNL5	M6 family metalloprotease domain-containing protein (Protease)	ASJ32_05045 GO994_04425	SP(Sec/SPI)	Unknown	O	peptidase M6 immune inhibitor A	Chromosome	22.263	20.4095	NaN	20.6492	38	38	38	51.5	51.5	51.5	83.069	0	289.37	917580000	448	A0A6N4CNL5	A0A6N4CNL5
A0A6N4CNL6	Ribosomal RNA large subunit methyltransferase F (EC 2.1.1.181) (23S rRNA mA1618 methyltransferase) (rRNA adenine N-6-methyltransferase)	rlmF ASJ32_07930	OTHER	Cytoplasmic	J	Specifically methylates the adenine in position 1618 of 23S rRNA	Chromosome	21.0739	20.0531	20.9784	22.1548	19	19	19	54.6	54.6	54.6	34.18	0	274.57	450680000	281	A0A6N4CNL6	A0A6N4CNL6
A0A6N4CNM2	Uncharacterized protein	ASJ32_05110	OTHER	Cytoplasmic	S	protein conserved in bacteria	Chromosome	26.5607	27.1367	27.5803	26.7193	5	5	5	35.5	35.5	35.5	12.441	0	200.29	2130100000	237	A0A6N4CNM2	A0A6N4CNM2
A0A6N4CNM8	Dihydropteroate synthase (DHPS) (EC 2.5.1.15) (Dihydropteroate pyrophosphorylase)	folP ASJ32_04300 GO994_05230	OTHER	Cytoplasmic	H	Catalyzes the condensation of para-aminobenzoate (pABA) with 6-hydroxymethyl-7,8-dihydropterin diphosphate (DHPt-PP) to form 7,8-dihydropteroate (H2Pte), the immediate precursor of folate derivatives	Chromosome	24.7845	25.7285	24.0461	23.2819	19	19	19	82.9	82.9	82.9	30.614	0	323.31	728990000	346	A0A6N4CNM8	A0A6N4CNM8
A0A6N4CNN8	OmpA-like domain-containing protein	ASJ32_08085	SP(Sec/SPI)	OuterMembrane	M	Belongs to the ompA family	Chromosome	23.0204	23.3707	24.0926	24.3871	38	36	36	70.6	70.6	70.6	35.157	0	323.31	51250000000	7932	A0A6N4CNN8	A0A6N4CNN8
A0A6N4CNP1	Oxidoreductase	ASJ32_08575	OTHER	Unknown	S	Phage major capsid protein, P2 family	Chromosome	22.9237	21.39	23.7125	23.9216	55	55	55	96.6	96.6	96.6	38.459	0	323.31	402090000000	24312	A0A6N4CNP1	A0A6N4CNP1
A0A6N4CNP3	Cell division protein DamX	ASJ32_17330	OTHER	CytoplasmicMembrane	U	Sporulation related domain	Chromosome	22.2547	22.1726	23.9265	24.0207	42	42	42	65	65	65	57.183	0	323.31	8565100000	2222	A0A6N4CNP3	A0A6N4CNP3
A0A6N4CNQ5	DUF1338 family protein (Succinyldiaminopimelate aminotransferase)	ASJ32_17380 GO994_05970	OTHER	Unknown	S	DUF1338	Chromosome	22.4709	23.2421	NaN	20.8146	18	18	18	71.7	71.7	71.7	29.579	0	319.77	387690000	302	A0A6N4CNQ5	A0A6N4CNQ5
A0A6N4CNS7	Ribosomal silencing factor RsfS	rsfS ASJ32_17010 GO994_05600	OTHER	Cytoplasmic	J	Functions as a ribosomal silencing factor. Interacts with ribosomal protein L14 (rplN), blocking formation of intersubunit bridge B8. Prevents association of the 30S and 50S ribosomal subunits and the formation of functional ribosomes, thus repressing translation	Chromosome	23.7366	22.8586	24.8169	22.7943	7	7	7	69	69	69	12.443	0	323.31	337730000	281	A0A6N4CNS7	A0A6N4CNS7
A0A6N4CNT0	Porphobilinogen deaminase (PBG) (EC 2.5.1.61) (Hydroxymethylbilane synthase) (HMBS) (Pre-uroporphyrinogen synthase)	hemC ASJ32_05990	OTHER	Cytoplasmic	H	Tetrapolymerization of the monopyrrole PBG into the hydroxymethylbilane pre-uroporphyrinogen in several discrete steps	Chromosome	22.1583	21.6678	20.3586	22.0775	17	17	17	72.1	72.1	72.1	34.315	0	155.91	139000000	159	A0A6N4CNT0	A0A6N4CNT0
A0A6N4CNT2	AAA family ATPase (Nucleoside triphosphate hydrolase)	ASJ32_17060 GO994_05650	OTHER	Cytoplasmic	T	PhoH-like protein	Chromosome	26.5072	26.1111	25.9204	26.4441	37	37	37	86.2	86.2	86.2	38.565	0	323.31	3101900000	1311	A0A6N4CNT2	A0A6N4CNT2
A0A6N4CNT4	S-adenosylmethionine synthase (AdoMet synthase) (EC 2.5.1.6) (MAT) (Methionine adenosyltransferase)	metK ASJ32_08405 GO994_16830	OTHER	Cytoplasmic	H	Catalyzes the formation of S-adenosylmethionine (AdoMet) from methionine and ATP. The overall synthetic reaction is composed of two sequential steps, AdoMet formation and the subsequent tripolyphosphate hydrolysis which occurs prior to release of AdoMet from the enzyme	Chromosome	27.2961	27.663	27.3229	27.6443	45	45	45	94.5	94.5	94.5	41.596	0	323.31	16206000000	3590	A0A6N4CNT4	A0A6N4CNT4
A0A6N4CNU1	Phage tail protein	ASJ32_08545	OTHER	Unknown	S	Protein of unknown function (DUF2597)	Chromosome	24.1671	23.285	24.1508	24.2775	24	24	24	98	98	98	16.318	0	323.31	18811000000	6753	A0A6N4CNU1	A0A6N4CNU1
A0A6N4CNV5	Aerolysin	ASJ32_06145	SP(Sec/SPI)	Extracellular	S	Aerolysin toxin	Chromosome	21.6132	23.2277	20.8218	NaN	30	30	30	43.3	43.3	43.3	54.073	0	323.31	1915900000	1091	A0A6N4CNV5	A0A6N4CNV5
A0A6N4CNW0	Fumarate reductase iron-sulfur subunit (EC 1.3.5.4) (Quinol-fumarate reductase iron-sulfur subunit)	ASJ32_17215	OTHER	CytoplasmicMembrane	C	Belongs to the succinate dehydrogenase fumarate reductase iron-sulfur protein family	Chromosome	21.7009	21.581	22.8706	22.4966	12	12	12	70.9	70.9	70.9	27.674	0	323.31	101160000	145	A0A6N4CNW0	A0A6N4CNW0
A0A6N4CNW4	Amidohydrolase (Carbon-nitrogen hydrolase family protein)	ASJ32_06255 GO994_02825	OTHER	Cytoplasmic	S	Carbon-nitrogen hydrolase	Chromosome	23.0978	23.4753	23.1443	23.3339	8	8	8	39.7	39.7	39.7	30.311	0	59.738	189680000	108	A0A6N4CNW4	A0A6N4CNW4
A0A6N4CNY5	Signal recognition particle receptor FtsY (SRP receptor)	ftsY ASJ32_06410	OTHER	Cytoplasmic	D	Involved in targeting and insertion of nascent membrane proteins into the cytoplasmic membrane. Acts as a receptor for the complex formed by the signal recognition particle (SRP) and the ribosome-nascent chain (RNC). Interaction with SRP-RNC leads to the transfer of the RNC complex to the Sec translocase for insertion into the membrane, the hydrolysis of GTP by both Ffh and FtsY, and the dissocia…	Chromosome	26.012	24.4625	25.826	26.9389	75	75	75	81.3	81.3	81.3	66.126	0	323.31	10619000000	2767	A0A6N4CNY5	A0A6N4CNY5
A0A6N4CP06	Regulator	ASJ32_07300	OTHER	Cytoplasmic	J	Endoribonuclease L-PSP	Chromosome	25.5051	24.878	25.5289	25.423	18	18	18	99.2	99.2	99.2	13.339	0	323.31	1495000000	415	A0A6N4CP06	A0A6N4CP06
A0A6N4CP08	UDP-N-acetylglucosamine 1-carboxyvinyltransferase (EC 2.5.1.7) (Enoylpyruvate transferase) (UDP-N-acetylglucosamine enolpyruvyl transferase) (EPT)	murA ASJ32_16305	OTHER	Cytoplasmic	M	Cell wall formation. Adds enolpyruvyl to UDP-N- acetylglucosamine	Chromosome	26.304	25.4934	25.3362	25.6354	40	40	40	85.4	85.4	85.4	44.31	0	323.31	3656400000	1566	A0A6N4CP08	A0A6N4CP08
A0A6N4CP13	Elongation factor Tu (EF-Tu)	tuf ASJ32_07355 GO994_01640 GO994_01730	OTHER	Cytoplasmic	J	This protein promotes the GTP-dependent binding of aminoacyl-tRNA to the A-site of ribosomes during protein biosynthesis	Chromosome	31.4711	31.6668	30.9929	30.8924	72	72	72	99.7	99.7	99.7	43.299	0	323.31	321450000000	37690	A0A6N4CP13	A0A6N4CP13
A0A6N4CP15	Methionine synthase (EC 2.1.1.13) (5-methyltetrahydrofolate--homocysteine methyltransferase)	ASJ32_06175	OTHER	Cytoplasmic	E	Methionine synthase	Chromosome	22.4522	22.2757	22.8884	23.8945	97	97	97	75.6	75.6	75.6	134.88	0	323.31	4134400000	1643	A0A6N4CP15	A0A6N4CP15
A0A6N4CP16	Lipopolysaccharide export system protein LptA	lptA ASJ32_16355	SP(Sec/SPI)	Unknown	S	Involved in the assembly of lipopolysaccharide (LPS). Required for the translocation of LPS from the inner membrane to the outer membrane. May form a bridge between the inner membrane and the outer membrane, via interactions with LptC and LptD, thereby facilitating LPS transfer across the periplasm	Chromosome	24.3391	24.0915	25.7952	24.8502	20	20	20	66.9	66.9	66.9	19.315	0	177.22	853310000	472	A0A6N4CP16	A0A6N4CP16
A0A6N4CP31	50S ribosomal protein L13	rplM ASJ32_16460	OTHER	Cytoplasmic	J	This protein is one of the early assembly proteins of the 50S ribosomal subunit, although it is not seen to bind rRNA by itself. It is important during the early stages of 50S assembly	Chromosome	30.0396	29.44	27.3174	30.2969	28	28	28	97.2	97.2	97.2	15.808	0	323.31	60543000000	6874	A0A6N4CP31	A0A6N4CP31
A0A6N4CP35	Anthranilate phosphoribosyltransferase (EC 2.4.2.18)	trpD ASJ32_21000	OTHER	Cytoplasmic	F	Catalyzes the transfer of the phosphoribosyl group of 5- phosphorylribose-1-pyrophosphate (PRPP) to anthranilate to yield N-(5'-phosphoribosyl)-anthranilate (PRA)	Chromosome	23.7037	25.2799	23.6012	23.6634	22	21	21	72.1	72.1	72.1	35.341	0	323.31	1175800000	365	A0A6N4CP35	A0A6N4CP35
A0A6N4CP37	Peptidyl-prolyl cis-trans isomerase (PPIase) (EC 5.2.1.8)	ASJ32_09315	OTHER	Cytoplasmic	O	PPIases accelerate the folding of proteins. It catalyzes the cis-trans isomerization of proline imidic peptide bonds in oligopeptides	Chromosome	27.3556	27.9879	26.6362	26.4088	20	20	20	98.2	98.2	98.2	17.93	0	323.31	5915400000	1795	A0A6N4CP37	A0A6N4CP37
A0A6N4CP48	L,D-transpeptidase	ASJ32_20905	SP(Sec/SPI)	Unknown	M	L,D-transpeptidase catalytic domain	Chromosome	26.8053	26.7015	26.857	26.0666	28	28	28	55.3	55.3	55.3	33.32	0	323.31	4192700000	1507	A0A6N4CP48	A0A6N4CP48
A0A6N4CP55	NAD(P)-bd_dom domain-containing protein	ASJ32_20755	OTHER	Unknown	GM	NAD(P)H-binding	Chromosome	18.2817	19.8455	NaN	19.6244	18	18	18	76.3	76.3	76.3	22.632	0	323.31	2034200000	784	A0A6N4CP55	A0A6N4CP55
A0A6N4CP57	Uncharacterized protein	ASJ32_07975	LIPO(Sec/SPII)	Unknown	S	Protein of unknown function (DUF1439)	Chromosome	22.4331	22.0576	21.736	21.6817	12	12	12	53.3	53.3	53.3	20.659	0	56.783	62417000	78	A0A6N4CP57	A0A6N4CP57
A0A6N4CP62	Decarboxylase	ASJ32_20805	OTHER	Unknown	E	decarboxylase	Chromosome	24.2947	23.3151	24.2262	24.241	33	33	33	62.2	62.2	62.2	56.562	0	323.31	679300000	396	A0A6N4CP62	A0A6N4CP62
A0A6N4CP65	Peptidyl-prolyl cis-trans isomerase (EC 5.2.1.8)	ASJ32_08180 GO994_15345	OTHER	Cytoplasmic	O	Domain amino terminal to FKBP-type peptidyl-prolyl isomerase	Chromosome	29.1478	29.0602	29.5423	29.4901	21	21	21	71.9	71.9	71.9	21.591	0	323.31	26397000000	3547	A0A6N4CP65	A0A6N4CP65
A0A6N4CP66	Tetratricopeptide repeat protein (Thioredoxin)	ASJ32_07945 GO994_15935	OTHER	Unknown	O	Tetratricopeptide repeat	Chromosome	24.0576	23.764	22.8412	22.22	14	14	14	52.5	52.5	52.5	31.453	0	225	233480000	180	A0A6N4CP66	A0A6N4CP66
A0A6N4CP75	Porin OmpAI	ompAI ASJ32_08080 GO994_15245	SP(Sec/SPI)	OuterMembrane	M	Belongs to the ompA family	Chromosome	24.905	24.7801	25.9157	25.9724	45	45	43	85.8	85.8	85.8	35.807	0	323.31	141350000000	14460	A0A6N4CP75	A0A6N4CP75
A0A6N4CP86	4-hydroxy-tetrahydrodipicolinate synthase (HTPA synthase) (EC 4.3.3.7)	dapA ASJ32_16050	OTHER	Cytoplasmic	E	Catalyzes the condensation of (S)-aspartate-beta- semialdehyde (S)-ASA and pyruvate to 4-hydroxy- tetrahydrodipicolinate (HTPA)	Chromosome	28.5165	28.6498	28.5842	28.2423	29	29	29	97.9	97.9	97.9	31.394	0	323.31	12783000000	3021	A0A6N4CP86	A0A6N4CP86
A0A6N4CPB7	Phosphate-binding protein	ASJ32_08205	SP(Sec/SPI)	CytoplasmicMembrane	P	PBP superfamily domain	Chromosome	24.5861	25.0203	24.2105	23.0265	33	33	33	67.3	67.3	67.3	34.421	0	323.31	813420000	534	A0A6N4CPB7	A0A6N4CPB7
A0A6N4CPC5	Cell wall degradation protein	ASJ32_08345	SP(Sec/SPI)	Unknown	S	Cell wall degradation protein	Chromosome	25.5728	25.1129	26.3142	25.4834	43	43	43	65.8	65.8	65.8	56.347	0	323.31	1662700000	722	A0A6N4CPC5	A0A6N4CPC5
A0A6N4CPD7	Transketolase (EC 2.2.1.1)	tkt ASJ32_08400 GO994_16825	OTHER	Cytoplasmic	G	Catalyzes the transfer of a two-carbon ketol group from a ketose donor to an aldose acceptor, via a covalent intermediate with the cofactor thiamine pyrophosphate	Chromosome	30.19	30.2343	30.1007	30.061	76	76	76	87.2	87.2	87.2	71.623	0	323.31	82146000000	10998	A0A6N4CPD7	A0A6N4CPD7
A0A6N4CPG0	Transaldolase (EC 2.2.1.2)	tal ASJ32_08480	OTHER	Cytoplasmic	H	Transaldolase is important for the balance of metabolites in the pentose-phosphate pathway	Chromosome	27.8562	28.4281	28.1603	27.6968	53	53	53	99.7	99.7	99.7	34.825	0	323.31	12296000000	2497	A0A6N4CPG0	A0A6N4CPG0
A0A6N4CPG1	Transcription termination/antitermination protein NusG	nusG ASJ32_07340 GO994_01655	OTHER	Cytoplasmic	K	Participates in transcription elongation, termination and antitermination	Chromosome	29.0657	28.3874	29.3268	29.421	16	16	16	76.5	76.5	76.5	20.994	0	323.31	18616000000	4103	A0A6N4CPG1	A0A6N4CPG1
A0A6N4CPG9	Trimethylamine-N-oxide reductase (EC 1.7.2.3)	ASJ32_07405	TAT(Tat/SPI)	Periplasmic	C	Molydopterin dinucleotide binding domain	Chromosome	24.4442	24.1834	25.6574	24.6538	35	35	35	52.7	52.7	52.7	90.628	0	266.88	435530000	393	A0A6N4CPG9	A0A6N4CPG9
A0A6N4CPI2	DEAD/DEAH box helicase	ASJ32_15865 GO994_03170	OTHER	Cytoplasmic	L	DEAD-box RNA helicase involved in ribosome assembly. Has RNA-dependent ATPase activity and unwinds double-stranded RNA	Chromosome	22.192	21.3194	21.4059	23.7887	24	24	24	54.7	54.7	54.7	45.152	0	323.31	473690000	371	A0A6N4CPI2	A0A6N4CPI2
A0A6N4CPI3	Aspartate-semialdehyde dehydrogenase (ASA dehydrogenase) (ASADH) (EC 1.2.1.11) (Aspartate-beta-semialdehyde dehydrogenase)	asd ASJ32_06775 GO994_10890	OTHER	Cytoplasmic	E	Catalyzes the NADPH-dependent formation of L-aspartate- semialdehyde (L-ASA) by the reductive dephosphorylation of L- aspartyl-4-phosphate	Chromosome	27.8455	28.4836	28.4575	28.1269	46	46	46	91.4	91.4	91.4	40.121	0	323.31	18229000000	3222	A0A6N4CPI3	A0A6N4CPI3
A0A6N4CPI4	Pseudouridine synthase (EC 5.4.99.-)	rluD ASJ32_07505	OTHER	Cytoplasmic	J	Responsible for synthesis of pseudouridine from uracil	Chromosome	26.0432	26.044	26.3381	26.5033	23	23	23	67.8	67.8	67.8	36.759	0	323.31	4054100000	1020	A0A6N4CPI4	A0A6N4CPI4
A0A6N4CPI9	5-methyltetrahydropteroyltriglutamate--homocysteine methyltransferase (EC 2.1.1.14) (Cobalamin-independent methionine synthase) (Methionine synthase, vitamin-B12 independent isozyme)	metE ASJ32_06830	OTHER	Cytoplasmic	E	Catalyzes the transfer of a methyl group from 5- methyltetrahydrofolate to homocysteine resulting in methionine formation	Chromosome	28.616	28.8779	28.7102	28.1076	91	91	90	89.1	89.1	89.1	85.358	0	323.31	25136000000	5226	A0A6N4CPI9	A0A6N4CPI9
A0A6N4CPJ0	2-nitropropane dioxygenase	ASJ32_15915	OTHER	Cytoplasmic	S	2-nitropropane dioxygenase	Chromosome	22.8033	22.1018	NaN	20.1309	8	8	8	38.2	38.2	38.2	35.979	0	72.781	62594000	62	A0A6N4CPJ0	A0A6N4CPJ0
A0A6N4CPK0	Hydrolase TatD	ASJ32_15270	OTHER	Cytoplasmic	L	TatD related DNase	Chromosome	NaN	23.1686	22.8786	22.8826	13	13	13	74.7	74.7	74.7	28.333	0	244.47	307110000	236	A0A6N4CPK0	A0A6N4CPK0
A0A6N4CPK5	Homoserine O-succinyltransferase (HST) (EC 2.3.1.46) (Homoserine transsuccinylase) (HTS)	metA metAS ASJ32_05260 GO994_19345	OTHER	Cytoplasmic	E	Transfers a succinyl group from succinyl-CoA to L- homoserine, forming succinyl-L-homoserine	Chromosome	23.4382	20.8182	21.4597	22.1698	19	19	19	66.6	66.6	66.6	36.186	0	283.66	639290000	338	A0A6N4CPK5	A0A6N4CPK5
A0A6N4CPK9	Transcription termination factor Rho (EC 3.6.4.-) (ATP-dependent helicase Rho)	rho ASJ32_15320 GO994_21850	OTHER	Cytoplasmic	K	Facilitates transcription termination by a mechanism that involves Rho binding to the nascent RNA, activation of Rho's RNA-dependent ATPase activity, and release of the mRNA from the DNA template	Chromosome	26.0254	25.1847	26.0413	27.2051	73	73	73	97.1	97.1	97.1	46.972	0	323.31	52331000000	7185	A0A6N4CPK9	A0A6N4CPK9
A0A6N4CPL1	Repressor	ASJ32_08665	OTHER	Unknown	KT	Peptidase S24-like	Chromosome	22.1511	21.9789	21.4298	NaN	11	11	11	37	37	37	25.154	0	72.579	113900000	59	A0A6N4CPL1	A0A6N4CPL1
A0A6N4CPM0	NAD-dependent malic enzyme (NAD-ME) (EC 1.1.1.38)	maeA ASJ32_08095	OTHER	Cytoplasmic	C	malic enzyme activity	Chromosome	29.029	29.3392	29.5704	28.8046	62	62	62	86.3	86.3	86.3	62.52	0	323.31	14705000000	2478	A0A6N4CPM0	A0A6N4CPM0
A0A6N4CPN0	DNA-directed RNA polymerase subunit beta (RNAP subunit beta) (EC 2.7.7.6) (RNA polymerase subunit beta) (Transcriptase subunit beta)	rpoB ASJ32_07315	OTHER	Cytoplasmic	K	DNA-dependent RNA polymerase catalyzes the transcription of DNA into RNA using the four ribonucleoside triphosphates as substrates	Chromosome	30.0566	30.3169	30.0705	30.0388	234	234	234	98.6	98.6	98.6	150.25	0	323.31	225870000000	39378	A0A6N4CPN0	A0A6N4CPN0
A0A6N4CPN1	Glutathione-dependent peroxiredoxin (EC 1.11.1.27)	ASJ32_08145 GO994_15310	OTHER	CytoplasmicMembrane	O	Peroxiredoxin	Chromosome	22.5674	22.5923	22.7044	22.3893	6	6	6	47.8	47.8	47.8	16.388	0	115.12	164290000	114	A0A6N4CPN1	A0A6N4CPN1
A0A6N4CPN3	Molecular chaperone	ASJ32_05425	SP(Sec/SPI)	Periplasmic	M	COG3121 P pilus assembly protein, chaperone PapD	Chromosome	21.3746	21.9102	23.3465	21.7776	15	15	15	61.3	61.3	61.3	26.953	0	82.799	60831000	108	A0A6N4CPN3	A0A6N4CPN3
A0A6N4CPN9	UDP-N-acetylenolpyruvoylglucosamine reductase (EC 1.3.1.98) (UDP-N-acetylmuramate dehydrogenase)	murB ASJ32_07380	OTHER	Cytoplasmic	M	Cell wall formation	Chromosome	22.8624	23.4828	23.7819	23.0818	14	14	14	40	40	40	37.296	0	97.093	95527000	91	A0A6N4CPN9	A0A6N4CPN9
A0A6N4CPP1	Outer membrane protein assembly factor BamD	bamD ASJ32_07510	LIPO(Sec/SPII)	Unknown	M	Part of the outer membrane protein assembly complex, which is involved in assembly and insertion of beta-barrel proteins into the outer membrane	Chromosome	22.5643	21.978	21.9249	23.2551	35	35	35	81.3	81.3	81.3	28.536	0	323.31	5634300000	1586	A0A6N4CPP1	A0A6N4CPP1
A0A6N4CPP2	M48 family metalloprotease (Peptidase)	ASJ32_08200 GO994_15365	LIPO(Sec/SPII)	Unknown	M	Peptidase family M48	Chromosome	22.9282	21.3718	23.3229	23.3529	20	20	20	70.9	70.9	70.9	28.36	0	323.31	1960700000	1159	A0A6N4CPP2	A0A6N4CPP2
A0A6N4CPR3	DNA ligase (EC 6.5.1.2) (Polydeoxyribonucleotide synthase [NAD(+)])	ligA ASJ32_08310	OTHER	Cytoplasmic	L	DNA ligase that catalyzes the formation of phosphodiester linkages between 5'-phosphoryl and 3'-hydroxyl groups in double-stranded DNA using NAD as a coenzyme and as the energy source for the reaction. It is essential for DNA replication and repair of damaged DNA	Chromosome	23.377	22.5439	23.6335	23.6145	51	51	51	79.7	79.7	79.7	72.102	0	323.31	2191900000	1014	A0A6N4CPR3	A0A6N4CPR3
A0A6N4CPR4	Cobalamin biosynthesis protein CobW	ASJ32_14935	OTHER	Cytoplasmic	S	Cobalamin synthesis protein cobW C-terminal domain	Chromosome	21.897	20.5566	21.6306	21.9219	31	31	31	73.1	73.1	73.1	40.845	0	323.31	1381000000	528	A0A6N4CPR4	A0A6N4CPR4
A0A6N4CPR7	Aspartate carbamoyltransferase regulatory chain	pyrI ASJ32_07590	OTHER	Cytoplasmic	F	Involved in allosteric regulation of aspartate carbamoyltransferase	Chromosome	26.1169	26.4187	26.1146	25.7635	22	22	22	97.4	97.4	97.4	17.456	0	323.31	4487100000	1421	A0A6N4CPR7	A0A6N4CPR7
A0A6N4CPT1	Transcriptional regulator	ASJ32_07655	OTHER	Cytoplasmic	K	Transcriptional regulator	Chromosome	21.7097	21.4873	22.5799	23.0255	27	27	27	74	74	74	35.71	0	289.08	462590000	339	A0A6N4CPT1	A0A6N4CPT1
A0A6N4CPT8	Deoxyribonuclease	ASJ32_08415 GO994_16840	SP(Sec/SPI)	Extracellular	L	Endonuclease I	Chromosome	24.7899	24.8779	25.1587	24.7631	27	27	27	78.2	78.2	78.2	26.708	0	323.31	1656900000	1205	A0A6N4CPT8	A0A6N4CPT8
A0A6N4CPU1	Cell division protein FtsA	ftsA ASJ32_15095 GO994_02385	OTHER	Cytoplasmic	D	Cell division protein that is involved in the assembly of the Z ring. May serve as a membrane anchor for the Z ring	Chromosome	23.7279	22.3591	22.5767	24.4904	40	40	40	86.2	86.2	86.2	45.026	0	323.31	9660600000	2466	A0A6N4CPU1	A0A6N4CPU1
A0A6N4CPU2	ADP-ribose diphosphatase	ASJ32_05730	OTHER	Cytoplasmic	L	Hydrolase	Chromosome	22.9442	23.9944	23.1475	23.1374	23	23	23	87.1	87.1	87.1	22.775	0	323.31	777680000	394	A0A6N4CPU2	A0A6N4CPU2
A0A6N4CPU8	Regulator of ribonuclease activity A	rraA ASJ32_07765 GO994_20870	OTHER	Cytoplasmic	H	Globally modulates RNA abundance by binding to RNase E (Rne) and regulating its endonucleolytic activity. Can modulate Rne action in a substrate-dependent manner by altering the composition of the degradosome. Modulates RNA-binding and helicase activities of the degradosome	Chromosome	25.6573	25.8699	26.7693	26.2825	10	10	10	42.2	42.2	42.2	17.237	0	228.66	1946700000	554	A0A6N4CPU8	A0A6N4CPU8
A0A6N4CPV0	Glutamine synthetase	ASJ32_07850 GO994_20790	OTHER	Cytoplasmic	E	glutamine synthetase	Chromosome	21.4794	20.427	NaN	21.9109	21	21	21	56	56	56	50.404	0	40.648	335750000	223	A0A6N4CPV0	A0A6N4CPV0
A0A6N4CPW2	Chaperone (Molecular chaperone)	yegD ASJ32_07875 GO994_20765	OTHER	Cytoplasmic	O	MreB/Mbl protein	Chromosome	22.6117	22.3181	21.9655	23.4247	53	53	53	93.8	93.8	93.8	49.288	0	323.31	3202100000	1148	A0A6N4CPW2	A0A6N4CPW2
A0A6N4CPW5	Alanine--tRNA ligase (EC 6.1.1.7) (Alanyl-tRNA synthetase) (AlaRS)	alaS ASJ32_05840	OTHER	Cytoplasmic	J	Catalyzes the attachment of alanine to tRNA(Ala) in a two-step reaction alanine is first activated by ATP to form Ala- AMP and then transferred to the acceptor end of tRNA(Ala). Also edits incorrectly charged Ser-tRNA(Ala) and Gly-tRNA(Ala) via its editing domain	Chromosome	26.9779	26.8624	27.0573	26.7629	112	112	112	84.2	84.2	84.2	95.778	0	323.31	36826000000	8383	A0A6N4CPW5	A0A6N4CPW5
A0A6N4CPX4	Citrate synthase	gltA ASJ32_06710	OTHER	Cytoplasmic	C	Belongs to the citrate synthase family	Chromosome	28.754	28.9796	29.0188	28.4087	42	42	42	76.6	76.6	76.6	48.14	0	323.31	26594000000	5893	A0A6N4CPX4	A0A6N4CPX4
A0A6N4CPZ1	ATPase	ASJ32_08670	OTHER	Cytoplasmic	D	Domain of unknown function (DUF4041)	Chromosome	23.6777	22.7488	22.7003	26.0367	71	71	71	78	78	78	63.173	0	323.31	6088200000	1910	A0A6N4CPZ1	A0A6N4CPZ1
A0A6N4CPZ3	D,D-heptose 1,7-bisphosphate phosphatase (EC 3.1.3.-)	ASJ32_22755	OTHER	Cytoplasmic	E	1,7-bisphosphate phosphatase	Chromosome	25.7478	25.2797	NaN	25.7127	5	5	5	36.7	36.7	36.7	19.793	0	85.794	478550000	114	A0A6N4CPZ3	A0A6N4CPZ3
A0A6N4CPZ5	Riboflavin synthase (Riboflavin synthase subunit alpha)	ASJ32_14655 GO994_12580	OTHER	Cytoplasmic	H	riboflavin synthase, alpha	Chromosome	22.3833	23.0644	22.2663	NaN	8	8	8	54.1	54.1	54.1	22.253	0	147.21	127140000	100	A0A6N4CPZ5	A0A6N4CPZ5
A0A6N4CQ00	DNA-directed RNA polymerase subunit beta' (RNAP subunit beta') (EC 2.7.7.6) (RNA polymerase subunit beta') (Transcriptase subunit beta')	rpoC ASJ32_07310 GO994_01685	OTHER	Cytoplasmic	K	DNA-dependent RNA polymerase catalyzes the transcription of DNA into RNA using the four ribonucleoside triphosphates as substrates	Chromosome	29.8273	30.1228	29.9051	30.1822	251	251	251	96.1	96.1	96.1	158.2	0	323.31	382240000000	59078	A0A6N4CQ00	A0A6N4CQ00
A0A6N4CQ01	Peptide chain release factor 1 (RF-1)	prfA ASJ32_21420 GO994_16985	OTHER	Cytoplasmic	J	Peptide chain release factor 1 directs the termination of translation in response to the peptide chain termination codons UAG and UAA	Chromosome	25.3702	25.2969	23.4416	25.0128	38	38	38	88.4	88.4	88.4	40.801	0	323.31	2095900000	943	A0A6N4CQ01	A0A6N4CQ01
A0A6N4CQ09	Iron ABC transporter substrate-binding protein	ASJ32_14785	SP(Sec/SPI)	Unknown	P	Periplasmic binding protein	Chromosome	21.2432	22.4956	NaN	20.8667	25	25	25	57.6	57.6	57.6	40.751	0	302.88	629760000	290	A0A6N4CQ09	A0A6N4CQ09
A0A6N4CQ10	Triosephosphate isomerase (TIM) (TPI) (EC 5.3.1.1) (Triose-phosphate isomerase)	tpiA ASJ32_21315 GO994_12310	OTHER	Cytoplasmic	G	Involved in the gluconeogenesis. Catalyzes stereospecifically the conversion of dihydroxyacetone phosphate (DHAP) to D-glyceraldehyde-3-phosphate (G3P)	Chromosome	28.4084	28.6963	28.552	27.3213	30	30	30	100	100	100	25.972	0	323.31	20487000000	4439	A0A6N4CQ10	A0A6N4CQ10
A0A6N4CQ12	Bifunctional ligase/repressor BirA (Biotin operon repressor) (Biotin--[acetyl-CoA-carboxylase] ligase) (EC 6.3.4.15) (Biotin--protein ligase) (Biotin-[acetyl-CoA carboxylase] synthetase)	birA ASJ32_07375 GO994_01620	OTHER	Cytoplasmic	HK	Acts both as a biotin-- acetyl-CoA-carboxylase ligase and a biotin-operon repressor. In the presence of ATP, BirA activates biotin to form the BirA-biotinyl-5'-adenylate (BirA-bio- 5'-AMP or holoBirA) complex. HoloBirA can either transfer the biotinyl moiety to the biotin carboxyl carrier protein (BCCP) subunit of acetyl-CoA carboxylase, or bind to the biotin operator site and inhibit transcripti…	Chromosome	21.9297	21.3903	21.2129	22.0885	15	15	15	48.9	48.9	48.9	35.227	0	323.31	265970000	160	A0A6N4CQ12	A0A6N4CQ12
A0A6N4CQ16	60 kDa chaperonin (GroEL protein) (Protein Cpn60)	groEL groL ASJ32_19820 GO994_04165	OTHER	Cytoplasmic	O	Prevents misfolding and promotes the refolding and proper assembly of unfolded polypeptides generated under stress conditions	Chromosome	30.4658	30.7413	30.1964	30.7994	99	99	99	99.8	99.8	99.8	57.319	0	323.31	230760000000	42768	A0A6N4CQ16	A0A6N4CQ16
A0A6N4CQ22	Conjugal transfer protein TraI (Fragment)	ASJ32_21195	OTHER	CytoplasmicMembrane	L	TrwC relaxase	Chromosome	21.1557	21.2881	22.4934	23.0173	65	65	64	53.7	53.7	53.7	149.43	0	311.54	466360000	441	A0A6N4CQ22	A0A6N4CQ22
A0A6N4CQ25	Formyltetrahydrofolate deformylase (EC 3.5.1.10) (Formyl-FH(4) hydrolase)	purU ASJ32_07960	OTHER	Cytoplasmic	F	Catalyzes the hydrolysis of 10-formyltetrahydrofolate (formyl-FH4) to formate and tetrahydrofolate (FH4)	Chromosome	25.67	25.9714	26.2862	25.503	29	29	29	85.3	85.3	85.3	31.373	0	323.31	3753700000	1203	A0A6N4CQ25	A0A6N4CQ25
A0A6N4CQ26	Carbamoyl-phosphate synthase large chain (EC 6.3.5.5) (Carbamoyl-phosphate synthetase ammonia chain)	carB ASJ32_19535	LIPO(Sec/SPII)	Unknown	F	Carbamoyl-phosphate synthetase ammonia chain	Chromosome	28.2838	28.0686	28.8319	28.7315	131	131	131	79.7	79.7	79.7	117.76	0	323.31	69500000000	13559	A0A6N4CQ26	A0A6N4CQ26
A0A6N4CQ28	DNA topoisomerase 4 subunit B (EC 5.6.2.2) (Topoisomerase IV subunit B)	parE ASJ32_21895 GO994_19510	OTHER	Cytoplasmic	L	Topoisomerase IV is essential for chromosome segregation. It relaxes supercoiled DNA. Performs the decatenation events required during the replication of a circular DNA molecule	Chromosome	22.7181	20.9173	21.8602	23.8117	41	41	41	51.2	51.2	51.2	70.186	0	323.31	1392100000	916	A0A6N4CQ28	A0A6N4CQ28
A0A6N4CQ36	Gfo/Idh/MocA family oxidoreductase (Oxidoreductase)	ASJ32_08010 GO994_16000	OTHER	Unknown	S	Oxidoreductase	Chromosome	22.3984	23.2145	24.1094	23.0871	16	16	16	46.2	46.2	46.2	33.3	0	287.69	212070000	192	A0A6N4CQ36	A0A6N4CQ36
A0A6N4CQ38	Transcriptional regulator	ASJ32_14130	OTHER	Cytoplasmic	K	transcriptional	Chromosome	24.4634	23.9152	23.9646	25.051	36	36	36	96.1	96.1	96.1	31.285	0	323.31	4792600000	1664	A0A6N4CQ38	A0A6N4CQ38
A0A6N4CQ39	Alpha-1,4 glucan phosphorylase (EC 2.4.1.1)	ASJ32_07080	OTHER	Cytoplasmic	G	Phosphorylase is an important allosteric enzyme in carbohydrate metabolism. Enzymes from different sources differ in their regulatory mechanisms and in their natural substrates. However, all known phosphorylases share catalytic and structural properties	Chromosome	26.227	26.4265	26.9651	26.1074	85	85	85	83.2	83.2	83.2	93.475	0	323.31	6518200000	2443	A0A6N4CQ39	A0A6N4CQ39
A0A6N4CQ45	Aspartate carbamoyltransferase (EC 2.1.3.2) (Aspartate transcarbamylase) (ATCase)	pyrB ASJ32_07585	OTHER	Cytoplasmic	F	Belongs to the ATCase OTCase family	Chromosome	26.6473	26.7288	26.9518	26.4188	40	40	40	99	99	99	34.138	0	323.31	9975800000	2138	A0A6N4CQ45	A0A6N4CQ45
A0A6N4CQ48	2-keto-4-pentenoate hydratase	ASJ32_19360	OTHER	Unknown	Q	Fumarylacetoacetate (FAA) hydrolase family	Chromosome	21.0784	21.6988	20.888	20.9486	12	12	12	51.2	51.2	51.2	35.666	0	162.69	137120000	81	A0A6N4CQ48	A0A6N4CQ48
A0A6N4CQ53	D-galactose-binding periplasmic protein (D-galactose/ D-glucose-binding protein)	mglB ASJ32_07645 GO994_20990	SP(Sec/SPI)	Periplasmic	G	Periplasmic binding protein domain	Chromosome	24.6242	24.4243	25.2095	24.4093	24	24	24	75.9	75.9	75.9	35.16	0	323.31	615990000	384	A0A6N4CQ53	A0A6N4CQ53
A0A6N4CQ56	tRNA pseudouridine synthase A (EC 5.4.99.12) (tRNA pseudouridine(38-40) synthase) (tRNA pseudouridylate synthase I) (tRNA-uridine isomerase I)	truA hisT ASJ32_19430	OTHER	Unknown	J	Formation of pseudouridine at positions 38, 39 and 40 in the anticodon stem and loop of transfer RNAs	Chromosome	24.453	24.7451	25.4742	22.9264	14	14	14	49.4	49.4	49.4	29.819	0	69.738	325560000	208	A0A6N4CQ56	A0A6N4CQ56
A0A6N4CQ58	Major outer membrane lipoprotein Lpp	lpp ASJ32_07950 GO994_15940	LIPO(Sec/SPII)	OuterMembrane	M	Lipoprotein leucine-zipper	Chromosome	25.4513	24.6089	25.8476	26.0539	12	12	12	56.2	56.2	56.2	8.5066	0	323.31	82472000000	9094	A0A6N4CQ58	A0A6N4CQ58
A0A6N4CQ60	30S ribosomal protein S1	rpsA ASJ32_21140	OTHER	Cytoplasmic	J	thus facilitating recognition of the initiation point. It is needed to translate mRNA with a short Shine-Dalgarno (SD) purine-rich sequence	Chromosome	31.6816	32.0034	31.2034	31.9335	118	118	118	93.7	93.7	93.7	61.401	0	323.31	277470000000	39513	A0A6N4CQ60	A0A6N4CQ60
A0A6N4CQ63	Arginine--tRNA ligase (EC 6.1.1.19) (Arginyl-tRNA synthetase) (ArgRS)	argS ASJ32_07705	OTHER	Cytoplasmic	J	Arginyl-tRNA synthetase	Chromosome	27.1483	27.4763	27.0293	26.497	76	76	76	88.1	88.1	88.1	64.754	0	323.31	14983000000	4284	A0A6N4CQ63	A0A6N4CQ63
A0A6N4CQ64	Oxoglutarate dehydrogenase (succinyl-transferring) (EC 1.2.4.2)	ASJ32_06735	OTHER	Cytoplasmic	C	dehydrogenase, E1 component	Chromosome	26.5402	26.7274	27.2739	26.8387	107	107	107	81.8	81.8	81.8	104.72	0	323.31	19785000000	5383	A0A6N4CQ64	A0A6N4CQ64
A0A6N4CQ69	Uncharacterized protein	ASJ32_19480 GO994_13555	SP(Sec/SPI)	Unknown	-	-	Chromosome	21.9878	NaN	21.9461	22.4651	8	8	8	42.5	42.5	42.5	16.037	0	69.773	143590000	89	A0A6N4CQ69	A0A6N4CQ69
A0A6N4CQ71	Ribosomal protein S12 methylthiotransferase accessory factor YcaO	ASJ32_06770	OTHER	Cytoplasmic	S	YcaO cyclodehydratase, ATP-ad Mg2+-binding	Chromosome	26.3308	26.1916	25.765	25.3647	42	42	42	58.2	58.2	58.2	65.978	0	323.31	7509600000	2220	A0A6N4CQ71	A0A6N4CQ71
A0A6N4CQ75	Chemotaxis protein CheW	ASJ32_14335	OTHER	Cytoplasmic	NT	CheW-like domain	Chromosome	24.4031	24.4295	24.2762	23.0672	10	10	10	64.2	64.2	64.2	17.919	0	205.33	532240000	291	A0A6N4CQ75	A0A6N4CQ75
A0A6N4CQ76	Adenylate cyclase (EC 4.6.1.1)	cyaA ASJ32_05985	OTHER	Cytoplasmic	F	Belongs to the adenylyl cyclase class-1 family	Chromosome	24.8928	26.2449	28.6753	26.4168	35	35	35	46.9	46.9	46.9	96.964	0	198.72	673450000	371	A0A6N4CQ76	A0A6N4CQ76
A0A6N4CQ80	MOSC domain-containing protein (Molybdenum cofactor sulfurase)	ASJ32_07815 GO994_20825	OTHER	Unknown	S	3-alpha domain	Chromosome	22.9929	23.2908	22.3206	21.1359	12	12	12	73.5	73.5	73.5	26.305	0	117.88	237680000	177	A0A6N4CQ80	A0A6N4CQ80
A0A6N4CQ81	Glyoxalase	ASJ32_08220	OTHER	Unknown	E	glyoxalase bleomycin resistance protein dioxygenase	Chromosome	21.6415	21.8012	22.6636	21.6826	2	2	2	23.5	23.5	23.5	14.841	0	133.06	72620000	94	A0A6N4CQ81	A0A6N4CQ81
A0A6N4CQ84	HTH-type transcriptional regulator MetR	ASJ32_06825	OTHER	Cytoplasmic	K	Transcriptional regulator	Chromosome	21.1496	20.3962	NaN	21.0999	11	11	10	41.2	41.2	40.8	33.585	0	34.096	141230000	108	A0A6N4CQ84	A0A6N4CQ84
A0A6N4CQ89	Lactate dehydrogenase (EC 1.1.1.28)	ASJ32_07870	OTHER	Cytoplasmic	C	Belongs to the D-isomer specific 2-hydroxyacid dehydrogenase family	Chromosome	25.9902	26.2855	25.516	24.7632	36	36	36	86.9	86.9	86.9	36.26	0	323.31	2781200000	893	A0A6N4CQ89	A0A6N4CQ89
A0A6N4CQA2	Bifunctional aspartokinase/homoserine dehydrogenase [Includes: Aspartokinase (EC 2.7.2.4); Homoserine dehydrogenase (EC 1.1.1.3)]	thrA ASJ32_19320	OTHER	Cytoplasmic	E	homoserine dehydrogenase	Chromosome	27.0352	26.0855	26.5686	26.9612	87	87	86	75.5	75.5	74.8	89.6	0	323.31	23930000000	5134	A0A6N4CQA2	A0A6N4CQA2
A0A6N4CQA9	Phosphomethylpyrimidine synthase (EC 4.1.99.17) (Hydroxymethylpyrimidine phosphate synthase) (HMP-P synthase) (HMP-phosphate synthase) (HMPP synthase) (Thiamine biosynthesis protein ThiC)	thiC ASJ32_06140	OTHER	Cytoplasmic	H	Catalyzes the synthesis of the hydroxymethylpyrimidine phosphate (HMP-P) moiety of thiamine from aminoimidazole ribotide (AIR) in a radical S-adenosyl-L-methionine (SAM)-dependent reaction	Chromosome	27.0289	27.1859	26.8572	26.7867	59	59	59	74.1	74.1	74.1	74.664	0	323.31	8279800000	2377	A0A6N4CQA9	A0A6N4CQA9
A0A6N4CQC3	DUF416 family protein	ASJ32_03240 GO994_20635	OTHER	Cytoplasmic	S	Protein of unknown function (DUF416)	Chromosome	26.3157	26.0177	25.1193	24.3857	12	12	12	61.7	61.7	61.7	21.695	0	298.62	896750000	370	A0A6N4CQC3	A0A6N4CQC3
A0A6N4CQC5	Protease TldD	tldD ASJ32_06250	OTHER	Cytoplasmic	S	Putative modulator of DNA gyrase	Chromosome	24.7569	24.9524	25.3175	24.9633	38	38	38	75.3	75.3	75.3	51.04	0	323.31	2402400000	1393	A0A6N4CQC5	A0A6N4CQC5
A0A6N4CQC6	Adenylosuccinate lyase (ASL) (EC 4.3.2.2) (Adenylosuccinase)	ASJ32_21510	OTHER	Cytoplasmic	F	Belongs to the lyase 1 family. Adenylosuccinate lyase subfamily	Chromosome	28.777	28.6598	28.3762	28.1683	60	60	59	82.7	82.7	82.7	51.345	0	323.31	27195000000	4407	A0A6N4CQC6	A0A6N4CQC6
A0A6N4CQC8	Putative pre-16S rRNA nuclease (EC 3.1.-.-)	ruvX ASJ32_08440 GO994_16870	OTHER	Cytoplasmic	J	Could be a nuclease involved in processing of the 5'-end of pre-16S rRNA	Chromosome	23.5303	23.5526	23.9051	23.0626	10	10	10	64.3	64.3	64.3	15.617	0	109.39	153780000	67	A0A6N4CQC8	A0A6N4CQC8
A0A6N4CQC9	Fumarate hydratase class I (EC 4.2.1.2)	ASJ32_07055	OTHER	Cytoplasmic	C	Catalyzes the reversible hydration of fumarate to (S)- malate	Chromosome	25.6689	25.1384	24.8093	25.2896	51	51	51	79.1	79.1	79.1	54.444	0	323.31	3362700000	1650	A0A6N4CQC9	A0A6N4CQC9
A0A6N4CQD0	Chromosome partition protein Smc	smc ASJ32_08320	OTHER	Cytoplasmic	D	Required for chromosome condensation and partitioning	Chromosome	22.1695	21.5662	22.8654	23.5094	72	72	72	65.5	65.5	65.5	125.86	0	323.31	1182000000	737	A0A6N4CQD0	A0A6N4CQD0
A0A6N4CQD1	Uncharacterized protein	ASJ32_22010	SP(Sec/SPI)	Unknown	D	Protein of unknown function (DUF3450)	Chromosome	22.2787	23.0446	23.9024	NaN	31	31	31	72.3	72.3	72.3	28.235	0	323.31	885560000	581	A0A6N4CQD1	A0A6N4CQD1
A0A6N4CQD4	Uracil-DNA glycosylase (UDG) (EC 3.2.2.27)	ung ASJ32_08495	OTHER	Cytoplasmic	L	Excises uracil residues from the DNA which can arise as a result of misincorporation of dUMP residues by DNA polymerase or due to deamination of cytosine	Chromosome	23.2568	23.8448	23.4859	23.1423	14	14	14	55	55	55	24.745	0	282.55	780840000	449	A0A6N4CQD4	A0A6N4CQD4
A0A6N4CQD7	Tyrosine--tRNA ligase (EC 6.1.1.1) (Tyrosyl-tRNA synthetase) (TyrRS)	tyrS ASJ32_08375 GO994_16780	OTHER	Cytoplasmic	J	Catalyzes the attachment of tyrosine to tRNA(Tyr) in a two-step reaction tyrosine is first activated by ATP to form Tyr- AMP and then transferred to the acceptor end of tRNA(Tyr)	Chromosome	25.9198	26.2803	25.2125	25.2056	45	45	45	89.7	89.7	89.7	43.869	0	323.31	3759500000	1582	A0A6N4CQD7	A0A6N4CQD7
A0A6N4CQE4	Serine acetyltransferase (EC 2.3.1.30)	cysE ASJ32_19105 GO994_00610	OTHER	Cytoplasmic	E	serine acetyltransferase	Chromosome	25.3144	24.8423	25.7438	25.9032	17	17	17	58.7	58.7	58.7	27.901	0	205.21	1351800000	625	A0A6N4CQE4	A0A6N4CQE4
A0A6N4CQE5	DUF429 domain-containing protein (PhaC PHA synthase)	ASJ32_07140 GO994_11095	OTHER	Unknown	S	Protein of unknown function (DUF429)	Chromosome	21.8643	21.376	22.5104	22.3996	15	15	15	57.4	57.4	57.4	27.482	0	76.358	291400000	171	A0A6N4CQE5	A0A6N4CQE5
A0A6N4CQF5	Glutathione synthetase (EC 6.3.2.3) (GSH synthetase) (GSH-S) (GSHase) (Glutathione synthase)	gshB ASJ32_08425 GO994_16850	OTHER	Cytoplasmic	H	Belongs to the prokaryotic GSH synthase family	Chromosome	27.229	27.3938	27.5619	27.6411	31	31	31	58.7	58.7	58.7	35.307	0	323.31	5291100000	1086	A0A6N4CQF5	A0A6N4CQF5
A0A6N4CQG0	GNAT family acetyltransferase	ASJ32_07160	OTHER	Unknown	K	histone acetyltransferase HPA2 and related acetyltransferases	Chromosome	21.6725	21.1817	22.5691	20.7451	7	7	7	46.4	46.4	46.4	18.298	0	71.904	80707000	100	A0A6N4CQG0	A0A6N4CQG0
A0A6N4CQG1	Uncharacterized protein	ASJ32_08605	OTHER	Unknown	-	-	Chromosome	24.8744	25.5319	26.4528	25.6085	33	33	33	82.5	82.5	82.5	31.975	0	323.31	1670100000	842	A0A6N4CQG1	A0A6N4CQG1
A0A6N4CQI9	50S ribosomal protein L1	rplA ASJ32_07330 GO994_01665	OTHER	Cytoplasmic	J	Binds directly to 23S rRNA. The L1 stalk is quite mobile in the ribosome, and is involved in E site tRNA release	Chromosome	31.148	31.5041	31.739	31.6505	45	45	45	96.1	96.1	96.1	24.603	0	323.31	159040000000	29591	A0A6N4CQI9	A0A6N4CQI9
A0A6N4CQJ0	ABC transporter (ATP-binding cassette domain-containing protein)	ASJ32_03675 GO994_18475	OTHER	CytoplasmicMembrane	P	ABC transporter	Chromosome	22.122	21.6883	22.3681	22.1811	15	15	15	45.1	45.1	45.1	37.575	0	228.16	317170000	250	A0A6N4CQJ0	A0A6N4CQJ0
A0A6N4CQJ8	DNA topoisomerase 3 (EC 5.6.2.1) (DNA topoisomerase III)	topB ASJ32_07395	OTHER	Cytoplasmic	L	Releases the supercoiling and torsional tension of DNA, which is introduced during the DNA replication and transcription, by transiently cleaving and rejoining one strand of the DNA duplex. Introduces a single-strand break via transesterification at a target site in duplex DNA. The scissile phosphodiester is attacked by the catalytic tyrosine of the enzyme, resulting in the formation of a DNA-(5'…	Chromosome	22.6278	22.4362	24.1503	23.7439	43	43	43	61.1	61.1	61.1	72.407	0	138.9	403710000	324	A0A6N4CQJ8	A0A6N4CQJ8
A0A6N4CQK0	Methionine gamma-lyase (EC 4.4.1.11)	ASJ32_06785	OTHER	Cytoplasmic	E	Catalyzes the formation of L-homocysteine from O- succinyl-L-homoserine (OSHS) and hydrogen sulfide	Chromosome	26.1084	26.2744	27.0631	25.9748	22	22	22	58.4	58.4	58.4	40.854	0	323.31	2968000000	1073	A0A6N4CQK0	A0A6N4CQK0
A0A6N4CQK1	Glycogen debranching protein	ASJ32_18510	OTHER	Cytoplasmic	G	Belongs to the glycosyl hydrolase 13 family	Chromosome	24.4081	24.8604	24.5647	23.2332	36	36	36	64.2	64.2	64.2	80.016	0	323.31	577700000	361	A0A6N4CQK1	A0A6N4CQK1
A0A6N4CQK4	Aspartate--tRNA ligase (EC 6.1.1.12) (Aspartyl-tRNA synthetase) (AspRS)	aspS ASJ32_21045	OTHER	Cytoplasmic	J	Catalyzes the attachment of L-aspartate to tRNA(Asp) in a two-step reaction L-aspartate is first activated by ATP to form Asp-AMP and then transferred to the acceptor end of tRNA(Asp)	Chromosome	26.5985	25.5567	25.6682	25.8729	60	60	60	80.4	80.4	80.4	65.385	0	323.31	14279000000	3923	A0A6N4CQK4	A0A6N4CQK4
A0A6N4CQK5	Phosphoenolpyruvate--protein phosphotransferase (EC 2.7.3.9)	ASJ32_03780	OTHER	Cytoplasmic	T	Belongs to the PEP-utilizing enzyme family	Chromosome	22.0662	20.4818	18.9024	22.2042	54	54	54	72.1	72.1	72.1	84.49	0	323.31	1279900000	622	A0A6N4CQK5	A0A6N4CQK5
A0A6N4CQK6	Molybdopterin-synthase adenylyltransferase	ASJ32_06130	OTHER	Cytoplasmic	H	thiazole biosynthesis adenylyltransferase ThiF	Chromosome	22.4476	21.1998	21.723	23.1768	11	11	11	67.3	67.3	67.3	27.324	0	170.35	445280000	265	A0A6N4CQK6	A0A6N4CQK6
A0A6N4CQK9	Elongation factor G (EF-G)	fusA ASJ32_07270 GO994_01725	OTHER	Cytoplasmic	J	Catalyzes the GTP-dependent ribosomal translocation step during translation elongation. During this step, the ribosome changes from the pre-translocational (PRE) to the post- translocational (POST) state as the newly formed A-site-bound peptidyl-tRNA and P-site-bound deacylated tRNA move to the P and E sites, respectively. Catalyzes the coordinated movement of the two tRNA molecules, the mRNA and…	Chromosome	31.0085	31.2158	30.093	30.5056	129	129	128	98.7	98.7	98.7	77.497	0	323.31	247330000000	37382	A0A6N4CQK9	A0A6N4CQK9
A0A6N4CQL1	TetR family transcriptional regulator	ASJ32_18565 GO994_17835	OTHER	Cytoplasmic	K	transcriptional regulator	Chromosome	25.4841	24.9749	24.7023	25.3401	19	19	19	72.1	72.1	72.1	23.428	0	323.31	4579300000	969	A0A6N4CQL1	A0A6N4CQL1
A0A6N4CQL3	Hemolysin D	ASJ32_20940	LIPO(Sec/SPII)	CytoplasmicMembrane	M	Belongs to the membrane fusion protein (MFP) (TC 8.A.1) family	Chromosome	22.3897	22.4484	23.7282	23.384	39	39	39	72	72	72	40.206	0	323.31	2412200000	848	A0A6N4CQL3	A0A6N4CQL3
A0A6N4CQL6	Chaperone protein ClpB	clpB ASJ32_07495	OTHER	Cytoplasmic	O	Part of a stress-induced multi-chaperone system, it is involved in the recovery of the cell from heat-induced damage, in cooperation with DnaK, DnaJ and GrpE	Chromosome	25.2415	24.688	24.8325	25.6256	105	105	105	85.8	85.8	85.8	95.617	0	323.31	7041400000	2854	A0A6N4CQL6	A0A6N4CQL6
A0A6N4CQL8	50S ribosomal protein L7/L12	rplL ASJ32_07320 GO994_01675	OTHER	Cytoplasmic	J	Forms part of the ribosomal stalk which helps the ribosome interact with GTP-bound translation factors. Is thus essential for accurate translation	Chromosome	26.9337	26.2843	25.7626	25.7	20	20	20	99.2	99.2	99.2	12.397	0	323.31	3899500000	1795	A0A6N4CQL8	A0A6N4CQL8
A0A6N4CQM0	50S ribosomal protein L16 arginine hydroxylase (Cupin domain-containing protein)	ASJ32_21515 GO994_07825	OTHER	Cytoplasmic	S	A domain family that is part of the cupin metalloenzyme superfamily.	Chromosome	27.3845	27.5749	27.0799	27.1345	15	15	15	49.5	49.5	49.5	42.724	0	305.06	1939200000	554	A0A6N4CQM0	A0A6N4CQM0
A0A6N4CQM1	Aldehyde reductase	ASJ32_07550	OTHER	Cytoplasmic	C	alcohol dehydrogenase	Chromosome	22.6897	24.0741	22.7971	NaN	13	13	13	42.9	42.9	42.9	42.27	0	77.399	95896000	86	A0A6N4CQM1	A0A6N4CQM1
A0A6N4CQM2	Anthranilate synthase subunit II	ASJ32_20995	OTHER	Cytoplasmic	EH	Anthranilate synthase	Chromosome	23.9257	24.5491	NaN	23.5608	9	9	9	71.4	71.4	71.4	21.459	0	78.505	342540000	105	A0A6N4CQM2	A0A6N4CQM2
A0A6N4CQM4	Glutamine-dependent NAD(+) synthetase (EC 6.3.5.1) (NAD(+) synthase [glutamine-hydrolyzing])	nadE ASJ32_03885	SP(Sec/SPI)	Cytoplasmic	H	Catalyzes the ATP-dependent amidation of deamido-NAD to form NAD. Uses L-glutamine as a nitrogen source	Chromosome	25.143	25.4725	25.5818	24.4504	43	43	43	66.7	66.7	66.7	59.524	0	323.31	1989200000	791	A0A6N4CQM4	A0A6N4CQM4
A0A6N4CQM7	Potassium transporter KtrA	ASJ32_07385	SP(Sec/SPI)	Cytoplasmic	P	TrkA-N domain	Chromosome	22.6205	22.9168	22.7456	NaN	11	11	11	39.6	39.6	39.6	24.072	0	87.644	108900000	71	A0A6N4CQM7	A0A6N4CQM7
A0A6N4CQM8	MSHA biogenesis protein MshQ	ASJ32_06295	SP(Sec/SPI)	Unknown	U	calcium- and calmodulin-responsive adenylate cyclase activity	Chromosome	21.5522	20.2132	22.0843	21.0942	28	28	28	31.6	31.6	31.6	129.99	0	323.31	190780000	383	A0A6N4CQM8	A0A6N4CQM8
A0A6N4CQM9	Ornithine carbamoyltransferase (OTCase) (EC 2.1.3.3)	argF ASJ32_07605 GO994_01375	OTHER	Cytoplasmic	E	Reversibly catalyzes the transfer of the carbamoyl group from carbamoyl phosphate (CP) to the N(epsilon) atom of ornithine (ORN) to produce L-citrulline	Chromosome	22.7263	22.8033	23.1115	22.2663	15	15	15	57.5	57.5	57.5	37.587	0	116.79	185760000	281	A0A6N4CQM9	A0A6N4CQM9
A0A6N4CQP3	ATP-dependent 6-phosphofructokinase (ATP-PFK) (Phosphofructokinase) (EC 2.7.1.11) (Phosphohexokinase)	pfkA ASJ32_21310 GO994_12315	OTHER	Cytoplasmic	F	Catalyzes the phosphorylation of D-fructose 6-phosphate to fructose 1,6-bisphosphate by ATP, the first committing step of glycolysis	Chromosome	27.657	28.0721	27.8156	27.7482	35	35	35	83	83	83	34.753	0	323.31	19015000000	3975	A0A6N4CQP3	A0A6N4CQP3
A0A6N4CQP5	RNA polymerase sigma factor RpoH (RNA polymerase sigma-32 factor)	rpoH ASJ32_06395 GO994_02960	OTHER	Cytoplasmic	K	RNA polymerase sigma	Chromosome	24.1216	24.4574	NaN	23.9406	14	14	14	63.4	63.4	63.4	31.971	0	100.74	236350000	82	A0A6N4CQP5	A0A6N4CQP5
A0A6N4CQP6	Patatin (Patatin-like phospholipase RssA)	rssA ASJ32_08060 GO994_15225	OTHER	Extracellular	M	esterase of the alpha-beta hydrolase superfamily	Chromosome	23.4811	23.5374	24.7686	24.0008	16	16	16	57.6	57.6	57.6	31.073	0	313.65	508620000	389	A0A6N4CQP6	A0A6N4CQP6
A0A6N4CQQ3	Aminodeoxychorismate synthase (EC 2.6.1.85)	pabB ASJ32_07050	OTHER	Cytoplasmic	EH	chorismate binding enzyme	Chromosome	21.9292	22.2194	23.304	22.0109	14	14	14	38.6	38.6	38.6	51.403	0	92.215	115250000	120	A0A6N4CQQ3	A0A6N4CQQ3
A0A6N4CQQ6	C4-dicarboxylate ABC transporter substrate-binding protein	ASJ32_06510	SP(Sec/SPI)	Unknown	S	NMT1-like family	Chromosome	26.695	27.1767	26.5721	26.1953	45	45	45	73.7	73.7	73.7	34.433	0	323.31	10752000000	3686	A0A6N4CQQ6	A0A6N4CQQ6
A0A6N4CQQ7	Holliday junction ATP-dependent DNA helicase RuvA (EC 3.6.4.12)	ruvA ASJ32_04095 GO994_18045	OTHER	Cytoplasmic	L	The RuvA-RuvB complex in the presence of ATP renatures cruciform structure in supercoiled DNA with palindromic sequence, indicating that it may promote strand exchange reactions in homologous recombination. RuvAB is a helicase that mediates the Holliday junction migration by localized denaturation and reannealing. RuvA stimulates, in the presence of DNA, the weak ATPase activity of RuvB	Chromosome	23.8196	23.7164	22.0816	22.8254	17	17	17	59.3	59.3	59.3	22.524	0	287.47	1193000000	678	A0A6N4CQQ7	A0A6N4CQQ7
A0A6N4CQQ9	Arginine repressor	argR ASJ32_07595	OTHER	Cytoplasmic	K	Regulates arginine biosynthesis genes	Chromosome	NaN	20.7032	21.5973	21.7532	9	9	9	69.9	69.9	69.9	18.05	0	154.99	60760000	79	A0A6N4CQQ9	A0A6N4CQQ9
A0A6N4CQR5	Single-stranded DNA-binding protein (SSB)	ssb ASJ32_06570 GO994_18835	OTHER	Cytoplasmic	L	Plays an important role in DNA replication, recombination and repair. Binds to ssDNA and to an array of partner proteins to recruit them to their sites of action during DNA metabolism	Chromosome	27.4583	27.7493	27.9168	27.1106	18	18	18	76.5	76.5	76.5	21.486	0	323.31	8379700000	1763	A0A6N4CQR5	A0A6N4CQR5
A0A6N4CQR8	Tol-Pal system protein TolB	tolB ASJ32_04145	SP(Sec/SPI)	Periplasmic	U	Involved in the TonB-independent uptake of proteins	Chromosome	25.453	25.5654	26.1378	25.1147	51	51	51	70.5	70.5	70.5	48.181	0	323.31	15002000000	6225	A0A6N4CQR8	A0A6N4CQR8
A0A6N4CQR9	Putrescine-binding periplasmic protein	ASJ32_07835 GO994_20805	SP(Sec/SPI)	Periplasmic	P	Required for the activity of the bacterial periplasmic transport system of putrescine	Chromosome	23.8355	23.7687	23.8322	23.6908	18	18	18	62	62	62	39.698	0	323.31	507320000	392	A0A6N4CQR9	A0A6N4CQR9
A0A6N4CQS4	Glycerol dehydrogenase (Iron-containing alcohol dehydrogenase)	ASJ32_07155 GO994_11110	OTHER	Cytoplasmic	C	glycerol dehydrogenase	Chromosome	23.643	24.0974	24.0627	22.8904	23	23	23	63.7	63.7	63.7	40.535	0	323.31	1166300000	364	A0A6N4CQS4	A0A6N4CQS4
A0A6N4CQS5	ATP-dependent protease subunit HslV (EC 3.4.25.2)	hslV ASJ32_07715 GO994_20920	OTHER	Cytoplasmic	O	Protease subunit of a proteasome-like degradation complex believed to be a general protein degrading machinery	Chromosome	27.4512	27.8269	27.278	27.8236	19	19	19	68.9	68.9	68.9	18.9	0	323.31	7315500000	1692	A0A6N4CQS5	A0A6N4CQS5
A0A6N4CQT0	Sulfate adenylyltransferase subunit 2 (EC 2.7.7.4) (ATP-sulfurylase small subunit) (Sulfate adenylate transferase) (SAT)	cysD ASJ32_20690 GO994_03655	OTHER	Cytoplasmic	H	COG0175 3'-phosphoadenosine 5'-phosphosulfate sulfotransferase (PAPS reductase) FAD synthetase and related enzymes	Chromosome	27.021	26.9734	26.3683	27.0364	39	39	39	80.8	80.8	80.8	36.64	0	323.31	11351000000	2984	A0A6N4CQT0	A0A6N4CQT0
A0A6N4CQT2	Integration host factor subunit beta (IHF-beta)	ihfB himD ASJ32_21135	OTHER	Cytoplasmic	K	This protein is one of the two subunits of integration host factor, a specific DNA-binding protein that functions in genetic recombination as well as in transcriptional and translational control	Chromosome	26.1002	26.5406	26.8392	27.0674	9	9	9	86.2	86.2	86.2	10.648	0	323.31	2471700000	578	A0A6N4CQT2	A0A6N4CQT2
A0A6N4CQT4	Glutathione peroxidase	ASJ32_07205 GO994_11175	OTHER	Cytoplasmic	O	Glutathione peroxidase	Chromosome	24.2651	23.9893	21.7053	23.0617	7	7	7	76.6	76.6	76.6	17.693	0	220.75	341540000	146	A0A6N4CQT4	A0A6N4CQT4
A0A6N4CQU1	Restriction endonuclease	ASJ32_18400	OTHER	Cytoplasmic	S	Type I restriction enzyme R protein N terminus (HSDR_N)	Chromosome	22.5462	22.2921	23.4433	23.0397	37	37	37	82.9	82.9	82.9	40.904	0	323.31	1197500000	506	A0A6N4CQU1	A0A6N4CQU1
A0A6N4CQU2	Thiol:disulfide interchange protein	ASJ32_13800 GO994_21370	SP(Sec/SPI)	Periplasmic	O	Thiol disulfide interchange protein	Chromosome	25.7403	26.0223	26.3879	25.5009	23	23	23	97	97	97	22.595	0	323.31	3442000000	1024	A0A6N4CQU2	A0A6N4CQU2
A0A6N4CQU4	7-cyano-7-deazaguanine synthase (EC 6.3.4.20) (7-cyano-7-carbaguanine synthase) (PreQ(0) synthase) (Queuosine biosynthesis protein QueC)	queC ASJ32_21105	OTHER	Cytoplasmic	F	Catalyzes the ATP-dependent conversion of 7-carboxy-7- deazaguanine (CDG) to 7-cyano-7-deazaguanine (preQ(0))	Chromosome	23.2723	22.9475	23.0498	23.4638	10	10	10	46.8	46.8	46.8	25.888	0	88.555	310380000	233	A0A6N4CQU4	A0A6N4CQU4
A0A6N4CQU5	Multidrug transporter	ASJ32_20930	LIPO(Sec/SPII)	OuterMembrane	M	TIGRFAM RND efflux system, outer membrane lipoprotein, NodT family	Chromosome	21.449	NaN	22.6084	22.755	36	36	36	58.8	58.8	58.8	50.515	0	323.31	3358200000	1064	A0A6N4CQU5	A0A6N4CQU5
A0A6N4CQU9	2-dehydro-3-deoxyphosphooctonate aldolase (EC 2.5.1.55) (3-deoxy-D-manno-octulosonic acid 8-phosphate synthase) (KDO-8-phosphate synthase) (KDO 8-P synthase) (KDOPS) (Phospho-2-dehydro-3-deoxyoctonate aldolase)	kdsA ASJ32_21440	OTHER	Cytoplasmic	M	Belongs to the KdsA family	Chromosome	28.1965	28.2319	27.638	27.8685	41	41	41	98.6	98.6	98.6	31.089	0	323.31	10642000000	3016	A0A6N4CQU9	A0A6N4CQU9
A0A6N4CQV0	Glutathione peroxidase	ASJ32_20575	OTHER	Unknown	S	Protein of unknown function (DUF3297)	Chromosome	25.6902	24.9887	24.3753	25.4521	9	9	9	81.2	81.2	81.2	9.4366	0	323.31	680200000	327	A0A6N4CQV0	A0A6N4CQV0
A0A6N4CQV1	SsrA-binding protein (Small protein B)	smpB ASJ32_17830 GO994_07270	OTHER	Unknown	O	Required for rescue of stalled ribosomes mediated by trans-translation. Binds to transfer-messenger RNA (tmRNA), required for stable association of tmRNA with ribosomes. tmRNA and SmpB together mimic tRNA shape, replacing the anticodon stem-loop with SmpB. tmRNA is encoded by the ssrA gene	Chromosome	22.7867	22.178	22.0113	24.2425	13	13	13	53.1	53.1	53.1	18.561	0	75.843	306610000	160	A0A6N4CQV1	A0A6N4CQV1
A0A6N4CQV2	Branched-chain-amino-acid aminotransferase (BCAT) (EC 2.6.1.42)	ilvE ASJ32_13860	OTHER	Cytoplasmic	E	Belongs to the class-IV pyridoxal-phosphate-dependent aminotransferase family	Chromosome	27.0447	26.9343	27.5125	27.2795	31	31	31	84	84	84	34.384	0	323.31	3646300000	1302	A0A6N4CQV2	A0A6N4CQV2
A0A6N4CQV5	PHP domain-containing protein (S-adenosylmethionine tRNA ribosyltransferase)	ASJ32_20985 GO994_15845	OTHER	Cytoplasmic	S	DNA polymerase alpha chain like domain	Chromosome	22.8554	23.2939	23.9947	22.7789	12	12	12	34.5	34.5	34.5	32.498	0	170.01	185710000	155	A0A6N4CQV5	A0A6N4CQV5
A0A6N4CQV9	Chromosome partition protein MukE (Condesin subunit E)	mukE ASJ32_21335 GO994_12290	OTHER	Cytoplasmic	D	MukE-like family	Chromosome	24.7235	24.502	25.3162	25.4337	21	21	21	74.7	74.7	74.7	27.999	0	323.31	803200000	387	A0A6N4CQV9	A0A6N4CQV9
A0A6N4CQW8	Uncharacterized protein	ASJ32_22210	OTHER	Cytoplasmic	S	Domain of unknown function (DUF4276)	Chromosome	24.6657	24.9673	24.8756	24.9584	30	30	30	92.4	92.4	92.4	21.037	0	323.31	7363000000	1552	A0A6N4CQW8	A0A6N4CQW8
A0A6N4CQX4	Peptidase M17	ASJ32_22145	OTHER	Cytoplasmic	E	Belongs to the peptidase M17 family	Chromosome	23.2765	23.1681	24.1948	23.6568	20	20	20	48.2	48.2	48.2	54.556	0	323.31	430710000	404	A0A6N4CQX4	A0A6N4CQX4
A0A6N4CQX6	Thiamine-phosphate synthase (TP synthase) (TPS) (EC 2.5.1.3) (Thiamine-phosphate pyrophosphorylase) (TMP pyrophosphorylase) (TMP-PPase)	thiE ASJ32_06135	OTHER	Cytoplasmic	H	Condenses 4-methyl-5-(beta-hydroxyethyl)thiazole monophosphate (THZ-P) and 2-methyl-4-amino-5-hydroxymethyl pyrimidine pyrophosphate (HMP-PP) to form thiamine monophosphate (TMP)	Chromosome	25.8104	25.4458	25.9589	27.1646	25	25	25	62.2	62.2	62.2	55.356	0	323.31	2538900000	562	A0A6N4CQX6	A0A6N4CQX6
A0A6N4CQY9	Vibriobactin utilization protein ViuB	ASJ32_13330	OTHER	Cytoplasmic	P	Siderophore-interacting protein	Chromosome	22.5189	23.0596	23.3947	21.6808	14	14	14	52.2	52.2	52.2	30.135	0	166.94	1806700000	342	A0A6N4CQY9	A0A6N4CQY9
A0A6N4CQZ1	ArsC family reductase (ArsC family transcriptional regulator)	ASJ32_18005 GO994_07470	OTHER	Unknown	P	Belongs to the ArsC family	Chromosome	22.9126	22.9464	21.6048	22.331	13	13	13	88.8	88.8	88.8	13.154	0	94.795	134830000	99	A0A6N4CQZ1	A0A6N4CQZ1
A0A6N4CQZ5	Transcriptional regulator	ASJ32_22530	OTHER	Cytoplasmic	K	Repressor	Chromosome	23.8563	23.4275	22.9474	24.168	28	28	27	81.9	81.9	79	26.16	0	323.31	743970000	525	A0A6N4CQZ5	A0A6N4CQZ5
A0A6N4CQZ6	50S ribosomal protein L31 type B	rpmE2 ASJ32_06650	OTHER	Cytoplasmic	J	Ribosomal protein L31	Chromosome	29.4636	28.4567	27.0571	29.5526	17	17	17	98.9	98.9	98.9	10.305	0	323.31	23481000000	3292	A0A6N4CQZ6	A0A6N4CQZ6
A0A6N4CQZ7	LysR family transcriptional regulator	cysB ASJ32_21155	OTHER	Cytoplasmic	K	Transcriptional regulator	Chromosome	25.1622	25.5864	25.3665	25.2147	21	21	21	63.3	63.3	63.3	36.087	0	323.31	1161000000	874	A0A6N4CQZ7	A0A6N4CQZ7
A0A6N4CR02	Chaperone protein DnaJ	dnaJ ASJ32_13380 GO994_16230	OTHER	Cytoplasmic	O	ATP binding to DnaK triggers the release of the substrate protein, thus completing the reaction cycle. Several rounds of ATP-dependent interactions between DnaJ, DnaK and GrpE are required for fully efficient folding. Also involved, together with DnaK and GrpE, in the DNA replication of plasmids through activation of initiation proteins	Chromosome	25.3974	24.7242	25.5141	26.5284	66	66	66	95.8	95.8	95.8	41.25	0	323.31	19396000000	3651	A0A6N4CR02	A0A6N4CR02
A0A6N4CR10	N-acetyltransferase	ASJ32_18120 GO994_07600	OTHER	Unknown	S	Acetyltransferase	Chromosome	21.859	21.8368	22.0482	NaN	4	4	4	54.1	54.1	54.1	9.8351	0.00041085	15.969	51779000	43	A0A6N4CR10	A0A6N4CR10
A0A6N4CR11	DUF1311 domain-containing protein	ASJ32_20630 GO994_03590	LIPO(Sec/SPII)	Unknown	S	protein conserved in bacteria	Chromosome	25.5745	25.5108	26.31	25.5455	22	22	22	80.8	80.8	80.8	21.481	0	323.31	1126800000	506	A0A6N4CR11	A0A6N4CR11
A0A6N4CR17	Succinate--CoA ligase [ADP-forming] subunit alpha (EC 6.2.1.5) (Succinyl-CoA synthetase subunit alpha) (SCS-alpha)	sucD ASJ32_06750 GO994_10865	OTHER	Cytoplasmic	C	Succinyl-CoA synthetase functions in the citric acid cycle (TCA), coupling the hydrolysis of succinyl-CoA to the synthesis of either ATP or GTP and thus represents the only step of substrate-level phosphorylation in the TCA. The alpha subunit of the enzyme binds the substrates coenzyme A and phosphate, while succinate binding and nucleotide specificity is provided by the beta subunit	Chromosome	28.3371	28.4028	28.1224	28.5711	31	31	31	97.6	97.6	97.6	29.861	0	323.31	12026000000	2982	A0A6N4CR17	A0A6N4CR17
A0A6N4CR18	DNA topoisomerase 4 subunit A (EC 5.6.2.2) (Topoisomerase IV subunit A)	parC ASJ32_21900 GO994_19505	OTHER	Cytoplasmic	L	Topoisomerase IV is essential for chromosome segregation. It relaxes supercoiled DNA. Performs the decatenation events required during the replication of a circular DNA molecule	Chromosome	26.1436	25.8496	26.8213	26.6869	58	58	58	69.1	69.1	69.1	84.826	0	323.31	5677700000	2466	A0A6N4CR18	A0A6N4CR18
A0A6N4CR20	LysR family transcriptional regulator	ASJ32_18170 GO994_07655	OTHER	Cytoplasmic	K	hydrogen peroxide-inducible genes	Chromosome	24.5915	25.2009	24.5745	23.6941	19	19	19	60.3	60.3	60.3	33.746	0	323.31	472290000	237	A0A6N4CR20	A0A6N4CR20
A0A6N4CR24	Chromosome partition protein MukF (Condesin subunit F)	mukF ASJ32_21330 GO994_12295	OTHER	Cytoplasmic	D	Involved in chromosome condensation, segregation and cell cycle progression. May participate in facilitating chromosome segregation by condensation DNA from both sides of a centrally located replisome during cell division. Not required for mini-F plasmid partitioning. Probably acts via its interaction with MukB and MukE. Overexpression results in anucleate cells. It has a calcium binding activity	Chromosome	22.4919	21.8555	23.2435	23.5572	34	34	34	72.7	72.7	72.7	50.98	0	323.31	855030000	412	A0A6N4CR24	A0A6N4CR24
A0A6N4CR27	Pyruvate kinase (EC 2.7.1.40) (Fragment)	ASJ32_06640	OTHER	Cytoplasmic	G	Pyruvate kinase	Chromosome	28.4933	28.9254	28.7232	27.7459	57	57	57	88.5	88.5	88.5	45.34	0	323.31	24504000000	7060	A0A6N4CR27	A0A6N4CR27
A0A6N4CR36	30S ribosomal protein S7	rpsG ASJ32_07275 GO994_01720	OTHER	Cytoplasmic	J	One of the primary rRNA binding proteins, it binds directly to 16S rRNA where it nucleates assembly of the head domain of the 30S subunit. Is located at the subunit interface close to the decoding center, probably blocks exit of the E-site tRNA	Chromosome	31.4916	31.7684	32.561	32.3901	32	32	32	91.7	91.7	91.7	17.419	0	323.31	118970000000	13148	A0A6N4CR36	A0A6N4CR36
A0A6N4CR39	tRNA 5-methylaminomethyl-2-thiouridine biosynthesis bifunctional protein MnmC (tRNA mnm(5)s(2)U biosynthesis bifunctional protein) [Includes: tRNA (mnm(5)s(2)U34)-methyltransferase (EC 2.1.1.61); FAD-dependent cmnm(5)s(2)U34 oxidoreductase (EC 1.5.-.-)]	mnmC trmC yfcK ASJ32_06690	OTHER	Cytoplasmic	J	Catalyzes the last two steps in the biosynthesis of 5- methylaminomethyl-2-thiouridine (mnm(5)s(2)U) at the wobble position (U34) in tRNA. Catalyzes the FAD-dependent demodification of cmnm(5)s(2)U34 to nm(5)s(2)U34, followed by the transfer of a methyl group from S-adenosyl-L-methionine to nm(5)s(2)U34, to form mnm(5)s(2)U34	Chromosome	21.4428	20.0072	21.0796	23.2059	27	27	27	57.3	57.3	57.3	72.935	0	323.31	1089200000	649	A0A6N4CR39	A0A6N4CR39
A0A6N4CR46	50S ribosomal protein L10	rplJ ASJ32_07325 GO994_01670	OTHER	Cytoplasmic	J	Forms part of the ribosomal stalk, playing a central role in the interaction of the ribosome with GTP-bound translation factors	Chromosome	31.0227	31.0892	31.7174	31.8427	39	39	39	100	100	100	17.71	0	323.31	126790000000	12659	A0A6N4CR46	A0A6N4CR46
A0A6N4CR49	Elongation factor 4 (EF-4) (EC 3.6.5.n1) (Ribosomal back-translocase LepA)	lepA ASJ32_17675	OTHER	CytoplasmicMembrane	M	Required for accurate and efficient protein synthesis under certain stress conditions. May act as a fidelity factor of the translation reaction, by catalyzing a one-codon backward translocation of tRNAs on improperly translocated ribosomes. Back- translocation proceeds from a post-translocation (POST) complex to a pre-translocation (PRE) complex, thus giving elongation factor G a second chance to…	Chromosome	21.9825	21.137	22.2451	22.9713	43	43	43	57	57	57	65.967	0	323.31	6788200000	2058	A0A6N4CR49	A0A6N4CR49
A0A6N4CR51	Dihydrolipoyllysine-residue succinyltransferase component of 2-oxoglutarate dehydrogenase complex (EC 2.3.1.61) (2-oxoglutarate dehydrogenase complex component E2)	odhB ASJ32_06740 GO994_10855	OTHER	Cytoplasmic	C	The 2-oxoglutarate dehydrogenase complex catalyzes the overall conversion of 2-oxoglutarate to succinyl-CoA and CO(2)	Chromosome	27.5813	27.8464	27.4559	27.3712	47	47	47	79.4	79.4	79.4	42.474	0	323.31	13709000000	3591	A0A6N4CR51	A0A6N4CR51
A0A6N4CR58	Ribosomal RNA large subunit methyltransferase K/L [Includes: 23S rRNA m2G2445 methyltransferase (EC 2.1.1.173) (rRNA (guanine-N(2)-)-methyltransferase RlmL); 23S rRNA m7G2069 methyltransferase (EC 2.1.1.264) (rRNA (guanine-N(7)-)-methyltransferase RlmK)]	rlmL ASJ32_12975	OTHER	Cytoplasmic	J	Specifically methylates the guanine in position 2445 (m2G2445) and the guanine in position 2069 (m7G2069) of 23S rRNA	Chromosome	26.5206	26.3246	26.8788	26.373	88	88	88	79.5	79.5	79.5	82.677	0	323.31	12799000000	4439	A0A6N4CR58	A0A6N4CR58
A0A6N4CR59	(P)ppGpp synthetase (EC 2.7.6.5)	relA ASJ32_17725	OTHER	Cytoplasmic	KT	In eubacteria ppGpp (guanosine 3'-diphosphate 5-' diphosphate) is a mediator of the stringent response that coordinates a variety of cellular activities in response to changes in nutritional abundance	Chromosome	21.3121	21.3555	21.3188	23.2863	71	71	71	75.1	75.1	75.1	84.439	0	323.31	2710000000	1074	A0A6N4CR59	A0A6N4CR59
A0A6N4CR60	Protease 2 (EC 3.4.21.83)	ASJ32_06515	SP(Sec/SPI)	Periplasmic	E	Protease II	Chromosome	26.51	26.8831	26.8649	25.9142	74	74	74	88.9	88.9	88.9	81.136	0	323.31	4911800000	2163	A0A6N4CR60	A0A6N4CR60
A0A6N4CR68	MSHA biogenesis protein MshL	ASJ32_06320	LIPO(Sec/SPII)	OuterMembrane	NU	Secretin N-terminal domain	Chromosome	21.1924	20.6875	22.1875	21.5845	35	35	35	58.1	58.1	58.1	59.779	0	323.31	1671700000	1097	A0A6N4CR68	A0A6N4CR68
A0A6N4CR71	Peptidoglycan-binding protein	ASJ32_17780	LIPO(Sec/SPII)	OuterMembrane	M	Lysin motif	Chromosome	23.8461	25.3477	27.2128	25.5159	41	41	41	87.4	87.4	87.4	37.285	0	323.31	4314300000	1611	A0A6N4CR71	A0A6N4CR71
A0A6N4CR78	Uncharacterized protein	ASJ32_06045 GO994_19180	SP(Sec/SPI)	Periplasmic	S	protein conserved in bacteria	Chromosome	26.8955	27.2915	26.1288	26.6724	16	16	16	62.6	62.6	62.6	20.622	0	323.31	3673900000	940	A0A6N4CR78	A0A6N4CR78
A0A6N4CR79	Urocanate hydratase (Urocanase) (EC 4.2.1.49) (Imidazolonepropionate hydrolase)	hutU ASJ32_06370	OTHER	Cytoplasmic	H	Catalyzes the conversion of urocanate to 4-imidazolone- 5-propionate	Chromosome	28.096	28.1787	28.2726	28.2688	50	50	50	73.4	73.4	73.4	61.954	0	323.31	6602500000	2633	A0A6N4CR79	A0A6N4CR79
A0A6N4CR81	NAD(P) transhydrogenase subunit alpha (EC 7.1.1.1)	pntA ASJ32_07545	OTHER	CytoplasmicMembrane	C	The transhydrogenation between NADH and NADP is coupled to respiration and ATP hydrolysis and functions as a proton pump across the membrane	Chromosome	23.0936	21.9612	24.2487	24.483	38	38	38	62.7	62.7	62.7	53.337	0	323.31	36969000000	6391	A0A6N4CR81	A0A6N4CR81
A0A6N4CR83	Uncharacterized protein	ASJ32_04220	SP(Sec/SPI)	Unknown	S	Protein of unknown function (DUF1090)	Chromosome	25.4466	25.5072	26.3642	25.5217	15	15	15	80.8	80.8	80.8	14.307	0	323.31	1011200000	575	A0A6N4CR83	A0A6N4CR83
A0A6N4CR91	Probable transcriptional regulatory protein ASJ32_21040	ASJ32_21040 GO994_14275	OTHER	Unknown	K	Transcriptional regulatory protein	Chromosome	27.2598	27.5227	27.4207	27.3596	16	16	16	69.5	69.5	69.5	26.177	0	323.31	3255900000	1035	A0A6N4CR91	A0A6N4CR91
A0A6N4CR95	Threonine--tRNA ligase (EC 6.1.1.3) (Threonyl-tRNA synthetase) (ThrRS)	thrS ASJ32_13185 GO994_10510	OTHER	Cytoplasmic	J	Catalyzes the attachment of threonine to tRNA(Thr) in a two-step reaction L-threonine is first activated by ATP to form Thr-AMP and then transferred to the acceptor end of tRNA(Thr)	Chromosome	27.0395	27.1834	26.6971	27.4235	98	98	98	88.2	88.2	88.2	72.915	0	323.31	35698000000	7916	A0A6N4CR95	A0A6N4CR95
A0A6N4CRA0	Fatty acid metabolism regulator protein	fadR ASJ32_07010 GO994_12000	OTHER	Cytoplasmic	K	Multifunctional regulator of fatty acid metabolism	Chromosome	23.8574	23.5193	23.3412	24.1918	24	24	24	82.3	82.3	82.3	26.841	0	323.31	2551300000	756	A0A6N4CRA0	A0A6N4CRA0
A0A6N4CRA9	HD family phosphohydrolase	ASJ32_05255	OTHER	Cytoplasmic	T	Domain of unknown function (DUF3391)	Chromosome	22.4092	21.7969	21.9683	22.927	30	30	30	68	68	68	46.636	0	323.31	645010000	402	A0A6N4CRA9	A0A6N4CRA9
A0A6N4CRB0	ATP-dependent helicase (Helicase)	ASJ32_21785 GO994_15070	OTHER	CytoplasmicMembrane	L	SNF2 family N-terminal domain	Chromosome	20.4368	NaN	20.3363	21.0697	64	64	64	49	49	49	142.64	0	323.31	1839400000	907	A0A6N4CRB0	A0A6N4CRB0
A0A6N4CRB1	Transcription antitermination protein NusB (Antitermination factor NusB)	nusB ASJ32_04395 GO994_05140	OTHER	Cytoplasmic	K	Involved in transcription antitermination. Required for transcription of ribosomal RNA (rRNA) genes. Binds specifically to the boxA antiterminator sequence of the ribosomal RNA (rrn) operons	Chromosome	26.0771	25.8461	25.7184	25.3597	18	18	18	75.2	75.2	75.2	15.805	0	323.31	2494900000	897	A0A6N4CRB1	A0A6N4CRB1
A0A6N4CRB3	ATP-dependent protease ATPase subunit HslU (Unfoldase HslU)	hslU ASJ32_07720 GO994_20915	OTHER	Cytoplasmic	O	this subunit has chaperone activity. The binding of ATP and its subsequent hydrolysis by HslU are essential for unfolding of protein substrates subsequently hydrolyzed by HslV. HslU recognizes the N-terminal part of its protein substrates and unfolds these before they are guided to HslV for hydrolysis	Chromosome	28.5083	28.1556	27.822	28.7032	94	94	94	87.1	87.1	87.1	49.949	0	323.31	44208000000	7704	A0A6N4CRB3	A0A6N4CRB3
A0A6N4CRB5	Chorismate synthase (CS) (EC 4.2.3.5) (5-enolpyruvylshikimate-3-phosphate phospholyase)	aroC ASJ32_13285 GO994_11400	OTHER	Cytoplasmic	E	Catalyzes the anti-1,4-elimination of the C-3 phosphate and the C-6 proR hydrogen from 5-enolpyruvylshikimate-3-phosphate (EPSP) to yield chorismate, which is the branch point compound that serves as the starting substrate for the three terminal pathways of aromatic amino acid biosynthesis. This reaction introduces a second double bond into the aromatic ring system	Chromosome	27.4309	27.2401	28.4273	27.695	36	36	36	80.9	80.9	80.9	39.048	0	323.31	8595800000	2428	A0A6N4CRB5	A0A6N4CRB5
A0A6N4CRB6	Anthranilate synthase component 1 (EC 4.1.3.27)	ASJ32_20990 GO994_15855	OTHER	Cytoplasmic	E	Anthranilate synthase component I, N terminal region	Chromosome	24.2087	24.5676	24.1401	24.0523	43	43	43	70.8	70.8	70.8	59.814	0	323.31	2033300000	1112	A0A6N4CRB6	A0A6N4CRB6
A0A6N4CRC1	Ribosome-associated protein (Ribosome-associated protein YbcJ)	ybcJ ASJ32_07115 GO994_11070	OTHER	Unknown	S	S4 domain	Chromosome	25.5447	25.2645	25.7163	25.1283	7	7	7	97.4	97.4	97.4	8.3086	0	131.37	352280000	137	A0A6N4CRC1	A0A6N4CRC1
A0A6N4CRC6	UMP phosphatase	ASJ32_19990	OTHER	Cytoplasmic	G	Haloacid dehalogenase-like hydrolase	Chromosome	24.1459	24.493	25.4524	24.6941	18	18	18	73.9	73.9	73.9	27.585	0	323.31	1085300000	626	A0A6N4CRC6	A0A6N4CRC6
A0A6N4CRC9	Biotin carboxyl carrier protein of acetyl-CoA carboxylase	ASJ32_04495	OTHER	Cytoplasmic	I	first, biotin carboxylase catalyzes the carboxylation of the carrier protein and then the transcarboxylase transfers the carboxyl group to form malonyl-CoA	Chromosome	28.1323	27.5373	28.1063	28.7494	9	9	9	95.1	95.1	95.1	15.656	0	307.67	5416600000	1350	A0A6N4CRC9	A0A6N4CRC9
A0A6N4CRD1	Histidinol dehydrogenase (HDH) (EC 1.1.1.23)	hisD ASJ32_12575	OTHER	Cytoplasmic	E	Catalyzes the sequential NAD-dependent oxidations of L- histidinol to L-histidinaldehyde and then to L-histidine	Chromosome	27.2573	27.5199	26.4642	27.3455	34	34	34	76.4	76.4	76.4	45.901	0	323.31	5041700000	1411	A0A6N4CRD1	A0A6N4CRD1
A0A6N4CRD3	Uncharacterized protein	ASJ32_05365 GO994_19455	SP(Sec/SPI)	Unknown	-	/	Chromosome	24.5639	24.7859	24.7929	25.0171	28	28	28	83.3	83.3	83.3	25.675	0	323.31	1592200000	754	A0A6N4CRD3	A0A6N4CRD3
A0A6N4CRD4	Histidine ammonia-lyase (Histidase) (EC 4.3.1.3)	hutH ASJ32_06365	OTHER	Cytoplasmic	E	Aromatic amino acid lyase	Chromosome	26.225	26.0936	26.5983	25.8243	44	44	44	75.3	75.3	75.3	54.033	0	323.31	5628600000	2678	A0A6N4CRD4	A0A6N4CRD4
A0A6N4CRD5	Spermidine/putrescine import ATP-binding protein PotA (EC 7.6.2.11)	potA ASJ32_07830	OTHER	CytoplasmicMembrane	P	Part of the ABC transporter complex PotABCD involved in spermidine putrescine import. Responsible for energy coupling to the transport system	Chromosome	21.5756	21.9375	22.7417	21.1616	37	37	36	72.7	72.7	72.1	43.081	0	323.31	3378700000	1252	A0A6N4CRD5	A0A6N4CRD5
A0A6N4CRD6	TldD/PmbA family protein (Zn-dependent protease)	ASJ32_20895 GO994_05385	OTHER	Cytoplasmic	S	Zn-dependent proteases and their inactivated homologs	Chromosome	23.0811	23.5948	24.2219	23.2226	42	42	42	78.9	78.9	78.9	47.984	0	323.31	1169100000	755	A0A6N4CRD6	A0A6N4CRD6
A0A6N4CRD9	D-alanine--D-alanine ligase (EC 6.3.2.4) (D-Ala-D-Ala ligase) (D-alanylalanine synthetase)	ddl ASJ32_07215	OTHER	Cytoplasmic	F	Cell wall formation	Chromosome	25.5088	25.8802	23.8879	NaN	18	18	18	51.4	51.4	51.4	36.361	0	323.31	703270000	261	A0A6N4CRD9	A0A6N4CRD9
A0A6N4CRE2	Putative NAD(P)H nitroreductase (EC 1.-.-.-)	ASJ32_04565 GO994_04975	OTHER	Cytoplasmic	C	Nitroreductase family	Chromosome	23.8752	24.0111	23.5869	23.2276	16	16	16	81.9	81.9	81.9	20.16	0	266.44	424480000	292	A0A6N4CRE2	A0A6N4CRE2
A0A6N4CRE9	Chromosome segregation protein SMC	ASJ32_22215	OTHER	Cytoplasmic	S	AAA domain, putative AbiEii toxin, Type IV TA system	Chromosome	27.3782	27.1882	27.7297	27.1414	49	49	49	86.8	86.8	86.8	44.904	0	323.31	17109000000	4327	A0A6N4CRE9	A0A6N4CRE9
A0A6N4CRF2	50S ribosomal protein L25	rplY ASJ32_12680 GO994_11770	OTHER	Cytoplasmic	J	This is one of the proteins that binds to the 5S RNA in the ribosome where it forms part of the central protuberance	Chromosome	30.0728	29.8625	29.7055	30.7169	18	18	18	98.9	98.9	98.9	10.723	0	323.31	43419000000	5951	A0A6N4CRF2	A0A6N4CRF2
A0A6N4CRF3	Peptide chain release factor 2 (RF-2)	prfB ASJ32_04615	OTHER	Cytoplasmic	J	Peptide chain release factor 2 directs the termination of translation in response to the peptide chain termination codons UGA and UAA	Chromosome	27.0948	26.908	25.4789	25.7967	30	30	30	70	70	70	33.426	0	323.31	2941700000	962	A0A6N4CRF3	A0A6N4CRF3
A0A6N4CRF4	2-succinyl-5-enolpyruvyl-6-hydroxy-3-cyclohexene-1-carboxylate synthase (SEPHCHC synthase) (EC 2.2.1.9) (Menaquinone biosynthesis protein MenD)	menD ASJ32_05470	OTHER	Cytoplasmic	H	Catalyzes the thiamine diphosphate-dependent decarboxylation of 2-oxoglutarate and the subsequent addition of the resulting succinic semialdehyde-thiamine pyrophosphate anion to isochorismate to yield 2-succinyl-5-enolpyruvyl-6-hydroxy-3- cyclohexene-1-carboxylate (SEPHCHC)	Chromosome	22.2569	22.3875	22.8172	22.1001	15	15	15	35.3	35.3	35.3	62.803	0	99.368	111480000	136	A0A6N4CRF4	A0A6N4CRF4
A0A6N4CRF7	Tryptophan synthase beta chain (EC 4.2.1.20)	trpB ASJ32_21010 GO994_15875	OTHER	Cytoplasmic	E	The beta subunit is responsible for the synthesis of L- tryptophan from indole and L-serine	Chromosome	25.156	25.0767	22.8626	24.7935	33	33	33	89.7	89.7	89.7	42.876	0	323.31	2725600000	762	A0A6N4CRF7	A0A6N4CRF7
A0A6N4CRG2	Iron-sulfur cluster carrier protein	ASJ32_12735	OTHER	CytoplasmicMembrane	D	Binds and transfers iron-sulfur (Fe-S) clusters to target apoproteins. Can hydrolyze ATP	Chromosome	22.6604	21.4044	22.8209	22.3075	27	27	27	75	75	75	38.3	0	323.31	1194800000	556	A0A6N4CRG2	A0A6N4CRG2
A0A6N4CRG5	BolA family transcriptional regulator (YciI family protein)	ASJ32_20795 GO994_04290	OTHER	Unknown	S	YCII-related domain	Chromosome	25.3715	24.3427	24.1151	24.2162	9	9	9	98	98	98	10.68	0	227.8	591240000	134	A0A6N4CRG5	A0A6N4CRG5
A0A6N4CRG9	Cold-shock protein (RNA chaperone/antiterminator CspA)	cspA ASJ32_06590 GO994_18815	OTHER	Cytoplasmic	K	'Cold-shock' DNA-binding domain	Chromosome	30.9473	30.2836	28.7607	28.5263	11	11	11	91.4	91.4	91.4	7.5024	0	323.31	20724000000	4767	A0A6N4CRG9	A0A6N4CRG9
A0A6N4CRH5	RNA-binding protein	ASJ32_21600 GO994_00375	OTHER	CytoplasmicMembrane	S	RNA recognition motif	Chromosome	22.5654	22.2003	NaN	23.5289	14	14	14	58.9	58.9	58.9	17.733	0	323.31	7639300000	1159	A0A6N4CRH5	A0A6N4CRH5
A0A6N4CRH9	tRNA-specific 2-thiouridylase MnmA (EC 2.8.1.13)	mnmA ASJ32_21500 GO994_07840	OTHER	Cytoplasmic	J	Catalyzes the 2-thiolation of uridine at the wobble position (U34) of tRNA, leading to the formation of s(2)U34	Chromosome	24.7676	24.7888	24.7862	23.94	39	39	39	78.8	78.8	78.8	41.421	0	323.31	1833800000	919	A0A6N4CRH9	A0A6N4CRH9
A0A6N4CRJ0	Multifunctional 2',3'-cyclic-nucleotide 2'-phosphodiesterase/5'-nucleotidase/3'-nucleotidase	ASJ32_21390	LIPO(Sec/SPII)	Periplasmic	F	Belongs to the 5'-nucleotidase family	Chromosome	22.9089	22.1068	23.6826	24.3533	55	55	55	71.8	71.8	71.8	71.677	0	323.31	3564500000	1735	A0A6N4CRJ0	A0A6N4CRJ0
A0A6N4CRJ3	DnaT domain-containing protein	ASJ32_20765 GO994_04260	OTHER	Cytoplasmic	-	-	Chromosome	22.8828	21.9119	22.5888	22.5887	13	13	13	44.8	44.8	44.8	26.716	0	304.82	275730000	257	A0A6N4CRJ3	A0A6N4CRJ3
A0A6N4CRJ5	Ribose-phosphate pyrophosphokinase (RPPK) (EC 2.7.6.1) (5-phospho-D-ribosyl alpha-1-diphosphate) (Phosphoribosyl diphosphate synthase) (Phosphoribosyl pyrophosphate synthase) (P-Rib-PP synthase) (PRPP synthase) (PRPPase)	prs ASJ32_21395	OTHER	Cytoplasmic	F	Involved in the biosynthesis of the central metabolite phospho-alpha-D-ribosyl-1-pyrophosphate (PRPP) via the transfer of pyrophosphoryl group from ATP to 1-hydroxyl of ribose-5-phosphate (Rib-5-P)	Chromosome	28.9101	29.2436	29.5835	29.2881	44	44	44	87.9	87.9	87.9	34.227	0	323.31	34841000000	8659	A0A6N4CRJ5	A0A6N4CRJ5
A0A6N4CRK2	Multifunctional fusion protein [Includes: Indole-3-glycerol phosphate synthase (IGPS) (EC 4.1.1.48); N-(5'-phosphoribosyl)anthranilate isomerase (PRAI) (EC 5.3.1.24)]	trpF trpC ASJ32_21005	OTHER	Cytoplasmic	E	Belongs to the TrpC family	Chromosome	24.1614	23.9091	23.8379	23.765	40	40	40	76.7	76.7	76.7	53.416	0	323.31	1476700000	757	A0A6N4CRK2	A0A6N4CRK2
A0A6N4CRK3	Catalase-peroxidase (CP) (EC 1.11.1.21) (Peroxidase/catalase)	katG ASJ32_05355	OTHER	Cytoplasmic	P	Bifunctional enzyme with both catalase and broad- spectrum peroxidase activity	Chromosome	25.3433	24.4747	24.3075	25.2005	63	63	63	83.3	83.3	83.3	77.262	0	323.31	8505700000	2481	A0A6N4CRK3	A0A6N4CRK3
A0A6N4CRK4	50S ribosomal protein L36	rpmJ ASJ32_06645 GO994_10760	OTHER	Unknown	J	Belongs to the bacterial ribosomal protein bL36 family	Chromosome	22.7767	21.4966	NaN	22.9583	8	8	8	73.2	73.2	73.2	4.8268	0.00043516	26.464	3342600000	386	A0A6N4CRK4	A0A6N4CRK4
A0A6N4CRK6	DNA-binding protein VF530	ASJ32_05015 GO994_04455	OTHER	Unknown	S	DNA-binding protein VF530	Chromosome	24.3099	23.7908	24.3116	24.6316	6	6	6	84.3	84.3	84.3	10.041	0	105.29	184580000	89	A0A6N4CRK6	A0A6N4CRK6
A0A6N4CRK7	Two-component system response regulator (UvrY/SirA/GacA family response regulator transcription factor)	sirA uvrY ASJ32_12080 GO994_14640	OTHER	Cytoplasmic	T	helix_turn_helix, Lux Regulon	Chromosome	23.8363	21.4655	21.8901	23.3754	20	20	20	88.3	88.3	88.3	23.985	0	323.31	1985200000	796	A0A6N4CRK7	A0A6N4CRK7
A0A6N4CRK8	Ribosomal RNA large subunit methyltransferase J (EC 2.1.1.266) (23S rRNA (adenine(2030)-N6)-methyltransferase) (23S rRNA m6A2030 methyltransferase)	rlmJ ASJ32_20655 GO994_03620	OTHER	Cytoplasmic	S	Specifically methylates the adenine in position 2030 of 23S rRNA	Chromosome	24.0155	24.2402	23.3094	22.9985	18	18	18	60.9	60.9	60.9	32.146	0	66.74	239220000	133	A0A6N4CRK8	A0A6N4CRK8
A0A6N4CRL1	3-oxoacyl-ACP synthase (EC 2.3.1.41) (Beta-ketoacyl-ACP synthase I)	fabB ASJ32_06695 GO994_10810	OTHER	Cytoplasmic	IQ	Belongs to the beta-ketoacyl-ACP synthases family	Chromosome	28.4255	28.281	28.2583	28.2802	40	40	40	81.1	81.1	81.1	42.762	0	323.31	20827000000	5452	A0A6N4CRL1	A0A6N4CRL1
A0A6N4CRL5	Adenylyl-sulfate kinase (EC 2.7.1.25) (APS kinase) (ATP adenosine-5'-phosphosulfate 3'-phosphotransferase) (Adenosine-5'-phosphosulfate kinase)	cysC ASJ32_20705	OTHER	Cytoplasmic	F	Catalyzes the synthesis of activated sulfate	Chromosome	22.512	21.2922	NaN	21.339	12	12	12	75.5	75.5	75.5	21.375	0	206.72	464860000	239	A0A6N4CRL5	A0A6N4CRL5
A0A6N4CRL7	1,4-dihydroxy-2-naphthoyl-CoA synthase (DHNA-CoA synthase) (EC 4.1.3.36)	menB ASJ32_05460 GO994_20380	OTHER	Cytoplasmic	H	Converts o-succinylbenzoyl-CoA (OSB-CoA) to 1,4- dihydroxy-2-naphthoyl-CoA (DHNA-CoA)	Chromosome	25.8037	26.1754	26.455	26.0482	25	25	25	76.2	76.2	76.2	31.834	0	323.31	1926600000	854	A0A6N4CRL7	A0A6N4CRL7
A0A6N4CRM1	Succinate--CoA ligase [ADP-forming] subunit beta (EC 6.2.1.5) (Succinyl-CoA synthetase subunit beta) (SCS-beta)	sucC ASJ32_06745 GO994_10860	OTHER	Cytoplasmic	C	Succinyl-CoA synthetase functions in the citric acid cycle (TCA), coupling the hydrolysis of succinyl-CoA to the synthesis of either ATP or GTP and thus represents the only step of substrate-level phosphorylation in the TCA. The beta subunit provides nucleotide specificity of the enzyme and binds the substrate succinate, while the binding sites for coenzyme A and phosphate are found in the alpha …	Chromosome	28.7013	28.5196	28.1782	28.3059	51	51	51	76.8	76.8	76.8	41.406	0	323.31	21429000000	3830	A0A6N4CRM1	A0A6N4CRM1
A0A6N4CRM3	Orotidine 5'-phosphate decarboxylase (EC 4.1.1.23) (OMP decarboxylase) (OMPDCase) (OMPdecase)	pyrF ASJ32_21120	OTHER	Cytoplasmic	F	Catalyzes the decarboxylation of orotidine 5'- monophosphate (OMP) to uridine 5'-monophosphate (UMP)	Chromosome	26.1293	26.2281	25.611	26.1467	16	16	16	73.4	73.4	73.4	24.861	0	323.31	2774700000	784	A0A6N4CRM3	A0A6N4CRM3
A0A6N4CRN3	Phosphoribosylglycinamide formyltransferase (EC 2.1.2.2) (5'-phosphoribosylglycinamide transformylase) (GAR transformylase) (GART)	purN ASJ32_12305	LIPO(Sec/SPII)	Cytoplasmic	F	Catalyzes the transfer of a formyl group from 10- formyltetrahydrofolate to 5-phospho-ribosyl-glycinamide (GAR), producing 5-phospho-ribosyl-N-formylglycinamide (FGAR) and tetrahydrofolate	Chromosome	25.6585	24.8859	25.2843	24.9542	14	14	14	84	84	84	22.698	0	323.31	1894400000	952	A0A6N4CRN3	A0A6N4CRN3
A0A6N4CRN4	D-amino acid dehydrogenase (EC 1.4.99.-)	dadA ASJ32_06855	OTHER	CytoplasmicMembrane	C	Oxidative deamination of D-amino acids	Chromosome	23.4235	23.9222	24.4502	23.8915	31	31	31	60.4	60.4	60.4	44.847	0	323.31	2842200000	821	A0A6N4CRN4	A0A6N4CRN4
A0A6N4CRP7	2',3'-cyclic-nucleotide 2'-phosphodiesterase/3'-nucleotidase (EC 3.1.3.6) (EC 3.1.4.16)	cpdB ASJ32_05610	LIPO(Sec/SPII)	Periplasmic	F	Belongs to the 5'-nucleotidase family	Chromosome	23.7084	22.2136	23.2879	24.2467	50	50	50	75.7	75.7	75.7	72.717	0	323.31	3284800000	1651	A0A6N4CRP7	A0A6N4CRP7
A0A6N4CRP8	Gamma-glutamylputrescine oxidoreductase	ASJ32_20570	OTHER	Cytoplasmic	E	FAD dependent oxidoreductase	Chromosome	19.7215	19.3793	20.4251	NaN	20	20	20	64.9	64.9	64.9	46.383	0	323.31	145990000	217	A0A6N4CRP8	A0A6N4CRP8
A0A6N4CRP9	Pseudouridine synthase (EC 5.4.99.-)	ASJ32_21490	OTHER	Cytoplasmic	J	Belongs to the pseudouridine synthase RsuA family	Chromosome	24.9749	24.5958	26.1433	25.9807	22	22	22	73.8	73.8	73.8	35.39	0	323.31	1413200000	652	A0A6N4CRP9	A0A6N4CRP9
A0A6N4CRQ5	Thiazole synthase (EC 2.8.1.10)	thiG ASJ32_06120	OTHER	Cytoplasmic	H	Catalyzes the rearrangement of 1-deoxy-D-xylulose 5- phosphate (DXP) to produce the thiazole phosphate moiety of thiamine. Sulfur is provided by the thiocarboxylate moiety of the carrier protein ThiS. In vitro, sulfur can be provided by H(2)S	Chromosome	25.4016	24.8305	25.3383	25.5071	27	27	27	85.9	85.9	85.9	26.556	0	261.45	1036800000	481	A0A6N4CRQ5	A0A6N4CRQ5
A0A6N4CRQ7	Ribosome-binding ATPase YchF	ychF ASJ32_21380	OTHER	Cytoplasmic	J	ATPase that binds to both the 70S ribosome and the 50S ribosomal subunit in a nucleotide-independent manner	Chromosome	27.8407	27.7551	28.1146	28.1208	42	42	42	89	89	89	39.519	0	323.31	9412600000	2157	A0A6N4CRQ7	A0A6N4CRQ7
A0A6N4CRR0	Uncharacterized protein	ASJ32_12480 GO994_15005	OTHER	Unknown	-	/	Chromosome	23.518	24.2151	22.249	22.9819	11	11	11	56.8	56.8	56.8	20.445	0	126.82	301230000	163	A0A6N4CRR0	A0A6N4CRR0
A0A6N4CRR1	Type II secretion system protein GspD	ASJ32_05660	SP(Sec/SPI)	OuterMembrane	NU	general secretion pathway protein D	Chromosome	23.006	22.2023	23.7164	23.8703	72	72	72	77.3	77.3	77.3	72.768	0	323.31	11042000000	4297	A0A6N4CRR1	A0A6N4CRR1
A0A6N4CRS7	Cell division protein MukB	mukB ASJ32_21340	OTHER	Cytoplasmic	D	Cell division protein MukB	Chromosome	24.9141	24.2059	24.5391	25.9131	176	176	175	81.4	81.4	81.4	166.18	0	323.31	17154000000	5415	A0A6N4CRS7	A0A6N4CRS7
A0A6N4CRV0	Uncharacterized protein	ASJ32_17130	OTHER	Cytoplasmic	S	Uncharacterized protein conserved in bacteria (DUF2331)	Chromosome	21.6835	21.9405	21.4366	NaN	15	15	15	45.8	45.8	45.8	44.592	0	82.105	70497000	105	A0A6N4CRV0	A0A6N4CRV0
A0A6N4CRV4	Histidine utilization repressor	hutC ASJ32_06385 GO994_02950	OTHER	Cytoplasmic	K	UTRA	Chromosome	23.1	21.4113	22.2005	22.4263	19	19	19	91.5	91.5	91.5	26.039	0	258.05	356110000	238	A0A6N4CRV4	A0A6N4CRV4
A0A6N4CRV6	DNA polymerase III subunit chi	ASJ32_05895 GO994_19920	OTHER	Cytoplasmic	L	DNA polymerase III chi subunit	Chromosome	22.9244	23.0351	NaN	23.3077	4	4	4	61.6	61.6	61.6	17.175	0	163.57	80149000	67	A0A6N4CRV6	A0A6N4CRV6
A0A6N4CRX4	10 kDa chaperonin (GroES protein) (Protein Cpn10)	groES groS ASJ32_19815	OTHER	Cytoplasmic	O	Binds to Cpn60 in the presence of Mg-ATP and suppresses the ATPase activity of the latter	Chromosome	29.7221	29.3632	30.1562	30.0572	24	24	24	100	100	100	10.269	0	323.31	23689000000	2894	A0A6N4CRX4	A0A6N4CRX4
A0A6N4CRY4	Heme chaperone HemW	ASJ32_19740	OTHER	Cytoplasmic	H	Involved in the biosynthesis of porphyrin-containing compound	Chromosome	22.4365	20.9799	21.8962	21.6926	14	14	13	49.3	49.3	48.6	42.893	0	236.4	189820000	144	A0A6N4CRY4	A0A6N4CRY4
A0A6N4CRZ4	DNA-binding protein HU (DNA-binding protein HU-beta)	hupB ASJ32_16840 GO994_08690	OTHER	Cytoplasmic	L	Histone-like DNA-binding protein which is capable of wrapping DNA to stabilize it, and thus to prevent its denaturation under extreme environmental conditions	Chromosome	30.7195	30.6434	30.9512	31.4117	20	20	20	96.7	96.7	96.7	9.1833	0	323.31	30001000000	4118	A0A6N4CRZ4	A0A6N4CRZ4
A0A6N4CRZ5	Uncharacterized protein	ASJ32_20015	OTHER	Cytoplasmic	C	FAD linked oxidases, C-terminal domain	Chromosome	20.863	20.3619	21.886	21.4905	88	88	88	78.6	78.6	78.6	113.23	0	323.31	4292200000	2254	A0A6N4CRZ5	A0A6N4CRZ5
A0A6N4CRZ9	Type VI secretion protein	ASJ32_11950	OTHER	CytoplasmicMembrane	S	Bacterial Type VI secretion, VC_A0110, EvfL, ImpJ, VasE	Chromosome	23.8411	22.3894	NaN	24.6562	26	26	26	72.1	72.1	72.1	49.466	0	323.31	463930000	265	A0A6N4CRZ9	A0A6N4CRZ9
A0A6N4CS01	Ribonuclease T (EC 3.1.13.-) (Exoribonuclease T) (RNase T)	rnt ASJ32_20050	OTHER	Cytoplasmic	L	Trims short 3' overhangs of a variety of RNA species, leaving a one or two nucleotide 3' overhang. Responsible for the end-turnover of tRNA specifically removes the terminal AMP residue from uncharged tRNA (tRNA-C-C-A). Also appears to be involved in tRNA biosynthesis	Chromosome	25.4141	25.8519	24.6776	25.9729	21	21	21	93.3	93.3	93.3	24.486	0	323.31	1085300000	821	A0A6N4CS01	A0A6N4CS01
A0A6N4CS04	Aldoketomutase (EC 4.4.1.5) (Glyoxalase I) (Ketone-aldehyde mutase) (Methylglyoxalase) (S-D-lactoylglutathione methylglyoxal lyase)	gloA ASJ32_20065 GO994_13265	OTHER	Cytoplasmic	E	Lactoylglutathione lyase	Chromosome	24.4485	25.1666	24.7491	23.7826	7	7	7	40.9	40.9	40.9	15.094	0	113.43	571210000	237	A0A6N4CS04	A0A6N4CS04
A0A6N4CS05	PilZ domain-containing protein	ASJ32_16890 GO994_08640	OTHER	Cytoplasmic	-	-	Chromosome	20.7379	NaN	21.3719	21.0336	9	9	9	44.5	44.5	44.5	22.035	0	289.9	486290000	255	A0A6N4CS05	A0A6N4CS05
A0A6N4CS07	Peptidyl-tRNA hydrolase (PTH) (EC 3.1.1.29)	pth ASJ32_21385	OTHER	Cytoplasmic	J	The natural substrate for this enzyme may be peptidyl- tRNAs which drop off the ribosome during protein synthesis	Chromosome	22.1389	21.1433	21.8296	22.8071	24	24	24	98	98	98	21.907	0	318.86	1692300000	620	A0A6N4CS07	A0A6N4CS07
A0A6N4CS12	ABC transporter ATP-binding protein	ASJ32_19915	OTHER	CytoplasmicMembrane	GM	Wzt C-terminal domain	Chromosome	22.3851	21.7514	22.0573	22.7128	26	26	26	66.8	66.8	66.8	40.29	0	323.31	1935000000	838	A0A6N4CS12	A0A6N4CS12
A0A6N4CS14	dTTP/UTP pyrophosphatase (dTTPase/UTPase) (EC 3.6.1.9) (Nucleoside triphosphate pyrophosphatase) (Nucleotide pyrophosphatase) (Nucleotide PPase)	ASJ32_06275 GO994_02845	OTHER	Cytoplasmic	D	Maf-like protein	Chromosome	23.2058	21.9455	23.4889	21.8344	18	18	18	77.4	77.4	77.4	21.565	0	114.13	160070000	144	A0A6N4CS14	A0A6N4CS14
A0A6N4CS16	Autonomous glycyl radical cofactor GrcA	grcA ASJ32_21450 GO994_16955	OTHER	Cytoplasmic	S	Acts as a radical domain for damaged PFL and possibly other radical proteins	Chromosome	23.3615	22.8633	23.5768	23.2734	12	11	11	97.6	92.1	92.1	14.196	0	156.24	265710000	175	A0A6N4CS16	A0A6N4CS16
A0A6N4CS22	Phospho-2-dehydro-3-deoxyheptonate aldolase (EC 2.5.1.54)	aroG ASJ32_11090 GO994_14005	OTHER	Cytoplasmic	E	Stereospecific condensation of phosphoenolpyruvate (PEP) and D-erythrose-4-phosphate (E4P) giving rise to 3-deoxy-D- arabino-heptulosonate-7-phosphate (DAHP)	Chromosome	27.6148	27.6084	27.7874	26.7675	48	48	46	95.7	95.7	93.7	38.101	0	323.31	7794500000	2230	A0A6N4CS22	A0A6N4CS22
A0A6N4CS23	Gamma-glutamyl-gamma-aminobutyrate hydrolase (Gamma-glutamyl-gamma-aminobutyrate hydrolase family protein)	ASJ32_05220 GO994_19305	OTHER	Cytoplasmic	S	Peptidase C26	Chromosome	20.2076	21.2484	21.05	20.6747	5	5	5	16.2	16.2	16.2	28.532	0.00041169	16.261	44165000	55	A0A6N4CS23	A0A6N4CS23
A0A6N4CS24	Maleylacetoacetate isomerase	ASJ32_19355	OTHER	Cytoplasmic	G	Glutathione S-transferase, C-terminal domain	Chromosome	25.6156	25.6782	25.548	25.2042	13	13	13	50	50	50	24.706	0	323.31	1259800000	277	A0A6N4CS24	A0A6N4CS24
A0A6N4CS28	Secretin	ASJ32_19905	LIPO(Sec/SPII)	OuterMembrane	NU	Bacterial type II and III secretion system protein	Chromosome	23.0891	22.0664	23.6437	24.4129	65	65	65	70.7	70.7	70.7	77.742	0	323.31	18899000000	5226	A0A6N4CS28	A0A6N4CS28
A0A6N4CS30	Formimidoylglutamase (EC 3.5.3.8) (Formiminoglutamase) (Formiminoglutamate hydrolase)	hutG ASJ32_06375	OTHER	Cytoplasmic	E	Catalyzes the conversion of N-formimidoyl-L-glutamate to L-glutamate and formamide	Chromosome	23.0287	22.4444	22.9588	23.3202	15	15	15	59.9	59.9	59.9	33.866	0	168	326170000	267	A0A6N4CS30	A0A6N4CS30
A0A6N4CS33	ArsR family transcriptional regulator (Winged helix-turn-helix transcriptional regulator)	ASJ32_05270 GO994_19355	OTHER	Cytoplasmic	K	helix_turn_helix ASNC type	Chromosome	23.6331	23.9251	23.2623	23.567	7	7	7	46.2	46.2	46.2	17.634	0	41.244	213420000	144	A0A6N4CS33	A0A6N4CS33
A0A6N4CS34	Acetyl-coenzyme A carboxylase carboxyl transferase subunit beta (ACCase subunit beta) (Acetyl-CoA carboxylase carboxyltransferase subunit beta) (EC 2.1.3.15)	accD ASJ32_19425 GO994_13470	OTHER	Cytoplasmic	I	Component of the acetyl coenzyme A carboxylase (ACC) complex. Biotin carboxylase (BC) catalyzes the carboxylation of biotin on its carrier protein (BCCP) and then the CO(2) group is transferred by the transcarboxylase to acetyl-CoA to form malonyl- CoA	Chromosome	25.0712	24.6663	24.941	25.6044	47	47	47	87.5	87.5	87.5	31.719	0	323.31	16863000000	3254	A0A6N4CS34	A0A6N4CS34
A0A6N4CS38	PTS IIA-like nitrogen regulatory protein PtsN (PTS sugar transporter)	ptsN ASJ32_16375 GO994_01955	OTHER	Cytoplasmic	G	Phosphoenolpyruvate-dependent sugar phosphotransferase system, EIIA 2	Chromosome	23.257	22.2618	21.6377	22.9845	13	13	13	62.2	62.2	62.2	16.203	0	138.44	142910000	153	A0A6N4CS38	A0A6N4CS38
A0A6N4CS41	Isochorismatase (EC 3.3.2.1)	ASJ32_11190 GO994_14110	OTHER	Cytoplasmic	Q	Isochorismatase	Chromosome	22.5611	22.2656	23.6229	21.5679	33	33	33	79.8	79.8	79.8	33.93	0	323.31	14001000000	1024	A0A6N4CS41	A0A6N4CS41
A0A6N4CS42	HAD-IA family hydrolase (Haloacid dehalogenase)	ASJ32_05200 GO994_19285	OTHER	Cytoplasmic	S	HAD-hyrolase-like	Chromosome	22.2326	22.5779	22.0477	22.4283	11	11	11	54.7	54.7	54.7	26.499	0	164.38	171270000	143	A0A6N4CS42	A0A6N4CS42
A0A6N4CS43	Peptidase S8 (S8 family serine peptidase)	ASJ32_19475 GO994_13560	SP(Sec/SPI)	Unknown	O	Subtilase family	Chromosome	18.7674	19.5162	19.7274	20.5277	45	45	45	83.4	83.4	83.4	66.89	0	323.31	13005000000	4626	A0A6N4CS43	A0A6N4CS43
A0A6N4CS47	Cell division protein DedD (DedD protein)	dedD ASJ32_19415 GO994_13460	OTHER	CytoplasmicMembrane	D	Sporulation related domain	Chromosome	24.0799	23.8239	25.8715	25.5085	20	20	20	52.3	52.3	52.3	27.19	0	323.31	4735200000	1038	A0A6N4CS47	A0A6N4CS47
A0A6N4CS56	DNA-binding protein Fis	fis ASJ32_20725 GO994_04220	OTHER	Cytoplasmic	K	Activates ribosomal RNA transcription. Plays a direct role in upstream activation of rRNA promoters	Chromosome	27.3713	27.7876	29.6392	28.6774	10	10	10	92.9	92.9	92.9	11.17	0	99.142	4356600000	1016	A0A6N4CS56	A0A6N4CS56
A0A6N4CS66	UTP--glucose-1-phosphate uridylyltransferase (EC 2.7.7.9) (UDP-glucose pyrophosphorylase)	ASJ32_20780	OTHER	Cytoplasmic	M	UTP-glucose-1-phosphate uridylyltransferase	Chromosome	25.2849	25.6543	25.4997	25.6418	32	32	32	83.2	83.2	83.2	33.651	0	323.31	1797000000	638	A0A6N4CS66	A0A6N4CS66
A0A6N4CS77	Acyl-CoA thioesterase (Thioesterase)	ASJ32_05360 GO994_19450	OTHER	Unknown	S	thioesterase	Chromosome	24.0849	23.8787	23.1657	NaN	10	10	10	55.7	55.7	55.7	15.202	0	102.79	203220000	136	A0A6N4CS77	A0A6N4CS77
A0A6N4CS79	Uncharacterized protein	ASJ32_06555	OTHER	Unknown	S	YjbD family (DUF3811)	Chromosome	28.0142	28.1234	28.7763	29.1073	14	14	14	87.2	87.2	87.2	10.818	0	323.31	6039600000	644	A0A6N4CS79	A0A6N4CS79
A0A6N4CS81	3-oxoacyl-ACP synthase	ASJ32_19240	OTHER	CytoplasmicMembrane	I	Catalyzes the condensation reaction of fatty acid synthesis by the addition to an acyl acceptor of two carbons from malonyl-ACP. Catalyzes the first condensation reaction which initiates fatty acid synthesis and may therefore play a role in governing the total rate of fatty acid production. Possesses both acetoacetyl-ACP synthase and acetyl transacylase activities. Its substrate specificity deter…	Chromosome	24.1458	23.6524	24.6268	22.9956	16	16	16	63.3	63.3	63.3	40.457	0	255.4	530610000	412	A0A6N4CS81	A0A6N4CS81
A0A6N4CS87	Glucose-6-phosphate isomerase (GPI) (EC 5.3.1.9) (Phosphoglucose isomerase) (PGI) (Phosphohexose isomerase) (PHI)	pgi ASJ32_18935 GO994_00425	OTHER	Cytoplasmic	G	Belongs to the GPI family	Chromosome	27.4138	27.684	25.1574	25.9157	45	45	45	71	71	71	61.201	0	323.31	6772500000	2440	A0A6N4CS87	A0A6N4CS87
A0A6N4CS90	ATP-dependent Zn protease	ASJ32_21065	LIPO(Sec/SPII)	Unknown	O	Putative ATP-dependant zinc protease	Chromosome	23.8037	NaN	24.229	24.7451	33	33	33	88.2	88.2	88.2	29.499	0	323.31	5165300000	2094	A0A6N4CS90	A0A6N4CS90
A0A6N4CS92	Fimbrial protein	ASJ32_05430	SP(Sec/SPI)	Extracellular	NU	Fimbrial protein	Chromosome	21.2016	21.6664	22.7189	NaN	13	13	13	40.1	40.1	40.1	37.426	0	283.88	72592000	158	A0A6N4CS92	A0A6N4CS92
A0A6N4CS94	Thiamine biosynthesis protein ThiH	thiH ASJ32_06115	OTHER	Cytoplasmic	C	Biotin and Thiamin Synthesis associated domain	Chromosome	22.6275	NaN	24.8187	24.8404	17	17	17	47.3	47.3	47.3	42.744	0	85.958	182870000	155	A0A6N4CS94	A0A6N4CS94
A0A6N4CS95	Uncharacterized protein	ASJ32_20505	SP(Sec/SPI)	Unknown	-	-	Chromosome	23.7928	23.7142	24.7147	24.6742	17	17	17	64.8	64.8	64.8	12.649	0	323.31	381130000	225	A0A6N4CS95	A0A6N4CS95
A0A6N4CS97	Exoribonuclease 2 (EC 3.1.13.1) (Exoribonuclease II) (RNase II) (Ribonuclease II)	rnb ASJ32_05585	OTHER	Cytoplasmic	K	Involved in mRNA degradation. Hydrolyzes single-stranded polyribonucleotides processively in the 3' to 5' direction	Chromosome	27.5715	27.6814	26.5993	27.3059	93	93	93	93	93	93	76.776	0	323.31	25541000000	7180	A0A6N4CS97	A0A6N4CS97
A0A6N4CSA6	Tryptophan synthase alpha chain (EC 4.2.1.20)	trpA ASJ32_21015	OTHER	Cytoplasmic	E	The alpha subunit is responsible for the aldol cleavage of indoleglycerol phosphate to indole and glyceraldehyde 3- phosphate	Chromosome	27.2759	26.8504	26.6728	26.7806	21	21	21	70.1	70.1	70.1	28.295	0	323.31	5160200000	1141	A0A6N4CSA6	A0A6N4CSA6
A0A6N4CSB2	LacI family transcriptional regulator (Substrate-binding domain-containing protein)	ASJ32_19030 GO994_00525	OTHER	Cytoplasmic	K	helix_turn _helix lactose operon repressor	Chromosome	20.1763	20.8723	20.9077	20.6176	14	14	14	37.9	37.9	37.9	37.18	0	213.41	116560000	156	A0A6N4CSB2	A0A6N4CSB2
A0A6N4CSB3	DNA-binding protein	ASJ32_20605	OTHER	Cytoplasmic	L	Belongs to the histone-like protein H-NS family	Chromosome	30.6257	30.9942	30.3165	31.0983	37	37	35	97.8	97.8	89	15.506	0	323.31	70637000000	5282	A0A6N4CSB3	A0A6N4CSB3
A0A6N4CSB8	UPF0178 protein ASJ32_05530	ASJ32_05530 GO994_20285	OTHER	Cytoplasmic	S	Belongs to the UPF0178 family	Chromosome	22.605	22.3167	22.5123	22.5202	7	7	7	46.7	46.7	46.7	16.372	0	53.921	68673000	48	A0A6N4CSB8	A0A6N4CSB8
A0A6N4CSD2	Anhydrase (Gamma carbonic anhydrase family protein)	ASJ32_19135 GO994_00635	OTHER	Cytoplasmic	S	Bacterial transferase hexapeptide (six repeats)	Chromosome	22.987	23.5602	23.7598	23.7826	11	11	11	57	57	57	19.444	0	242.27	167810000	147	A0A6N4CSD2	A0A6N4CSD2
A0A6N4CSD9	M24 family metallopeptidase (X-Pro aminopeptidase)	ASJ32_05630 GO994_20185	OTHER	Cytoplasmic	E	Creatinase/Prolidase N-terminal domain	Chromosome	27.3104	27.7439	27.7535	27.1955	53	53	53	83.2	83.2	83.2	67.257	0	323.31	8786500000	3781	A0A6N4CSD9	A0A6N4CSD9
A0A6N4CSE6	Imidazolonepropionase (EC 3.5.2.7) (Imidazolone-5-propionate hydrolase)	hutI ASJ32_06380	OTHER	Cytoplasmic	F	imidazolonepropionase activity	Chromosome	23.0198	23.6061	23.5486	23.2166	22	22	22	50.4	50.4	50.4	44.527	0	266.15	284860000	308	A0A6N4CSE6	A0A6N4CSE6
A0A6N4CSF4	Probable GTP-binding protein EngB	engB ASJ32_10695 GO994_00940	OTHER	Unknown	D	Necessary for normal cell division and for the maintenance of normal septation	Chromosome	26.5779	26.0274	26.7501	26.7817	21	21	21	81.6	81.6	81.6	24.268	0	323.31	5305900000	1537	A0A6N4CSF4	A0A6N4CSF4
A0A6N4CSF6	HTH-type transcriptional repressor FabR (Transcriptional regulator)	fabR ASJ32_06430 GO994_03000	OTHER	Cytoplasmic	K	Transcriptional regulator	Chromosome	23.3818	21.997	23.7516	23.1808	11	11	11	30.6	30.6	30.6	23.122	0	306.5	369340000	346	A0A6N4CSF6	A0A6N4CSF6
A0A6N4CSF9	1,4-alpha-glucan branching enzyme GlgB (EC 2.4.1.18) (1,4-alpha-D-glucan:1,4-alpha-D-glucan 6-glucosyl-transferase) (Alpha-(1->4)-glucan branching enzyme) (Glycogen branching enzyme) (BE)	glgB ASJ32_18505	OTHER	Cytoplasmic	G	Catalyzes the formation of the alpha-1,6-glucosidic linkages in glycogen by scission of a 1,4-alpha-linked oligosaccharide from growing alpha-1,4-glucan chains and the subsequent attachment of the oligosaccharide to the alpha-1,6 position	Chromosome	25.3091	25.891	24.9885	24.7424	40	40	40	56.8	56.8	56.8	82.939	0	323.31	3002200000	1237	A0A6N4CSF9	A0A6N4CSF9
A0A6N4CSG1	3'(2'),5'-bisphosphate nucleotidase CysQ (EC 3.1.3.7) (3'(2'),5-bisphosphonucleoside 3'(2')-phosphohydrolase) (3'-phosphoadenosine 5'-phosphate phosphatase) (PAP phosphatase)	cysQ ASJ32_05735	OTHER	Cytoplasmic	P	Inositol monophosphatase family	Chromosome	24.6105	23.5247	23.8853	24.2794	13	13	13	61.1	61.1	61.1	29.434	0	323.31	1608100000	731	A0A6N4CSG1	A0A6N4CSG1
A0A6N4CSG2	Translational regulator CsrA (Carbon storage regulator)	csrA ASJ32_05850 GO994_19965	OTHER	Unknown	J	A key translational regulator that binds mRNA to regulate translation initiation and or mRNA stability. Mediates global changes in gene expression, shifting from rapid growth to stress survival by linking envelope stress, the stringent response and the catabolite repression systems. Usually binds in the 5'- UTR	Chromosome	29.399	28.7196	31.2807	28.52	10	10	10	100	100	100	6.918	0	230.33	5911000000	495	A0A6N4CSG2	A0A6N4CSG2
A0A6N4CSH0	Flavin prenyltransferase UbiX (EC 2.5.1.129)	ubiX ASJ32_18560 GO994_17840	OTHER	Cytoplasmic	H	Flavin prenyltransferase that catalyzes the synthesis of the prenylated FMN cofactor (prenyl-FMN) for 4-hydroxy-3- polyprenylbenzoic acid decarboxylase UbiD. The prenyltransferase is metal-independent and links a dimethylallyl moiety from dimethylallyl monophosphate (DMAP) to the flavin N5 and C6 atoms of FMN	Chromosome	23.9406	24.2344	24.6918	23.7715	21	21	21	94.1	94.1	94.1	22.058	0	323.31	875160000	829	A0A6N4CSH0	A0A6N4CSH0
A0A6N4CSH3	Glyceraldehyde-3-phosphate dehydrogenase (EC 1.2.1.-)	gap ASJ32_18495 GO994_17905	OTHER	Cytoplasmic	G	Belongs to the glyceraldehyde-3-phosphate dehydrogenase family	Chromosome	31.2776	31.3143	31.5299	31.2261	65	65	65	99.7	99.7	99.7	35.035	0	323.31	203360000000	34022	A0A6N4CSH3	A0A6N4CSH3
A0A6N4CSH4	2-dehydro-3-deoxy-phosphogluconate aldolase (EC 4.1.2.14)	eda ASJ32_10805 GO994_01045	OTHER	Cytoplasmic	G	2-dehydro-3-deoxyphosphogluconate aldolase 4-hydroxy-2-oxoglutarate aldolase	Chromosome	23.2689	23.5241	23.3533	22.8882	11	11	11	54.5	54.5	54.5	21.946	0	179.23	270950000	134	A0A6N4CSH4	A0A6N4CSH4
A0A6N4CSH7	WYL domain-containing protein	ASJ32_06545	OTHER	Cytoplasmic	K	WYL domain	Chromosome	24.6797	25.1428	26.502	25.5204	33	33	33	89	89	89	37.236	0	323.31	1504200000	839	A0A6N4CSH7	A0A6N4CSH7
A0A6N4CSH9	SRPBCC domain-containing protein	ASJ32_20595 GO994_16320	OTHER	Unknown	S	Activator of Hsp90 ATPase homolog 1-like protein	Chromosome	24.2017	24.5916	NaN	21.936	9	9	9	67.5	67.5	67.5	19.293	0	122.54	382240000	130	A0A6N4CSH9	A0A6N4CSH9
A0A6N4CSI0	RNA polymerase-binding transcription factor DksA	dksA ASJ32_18615	OTHER	Cytoplasmic	T	Transcription factor that acts by binding directly to the RNA polymerase (RNAP). Required for negative regulation of rRNA expression and positive regulation of several amino acid biosynthesis promoters. Also required for regulation of fis expression	Chromosome	27.1708	26.8483	26.4604	26.6867	18	18	18	87.2	87.2	87.2	17.072	0	323.31	3156900000	1077	A0A6N4CSI0	A0A6N4CSI0
A0A6N4CSI1	NAD(P)-dependent oxidoreductase (SDR family NAD(P)-dependent oxidoreductase)	ASJ32_05315 GO994_19400	OTHER	Cytoplasmic	S	Belongs to the short-chain dehydrogenases reductases (SDR) family	Chromosome	24.7845	25.2536	26.5805	24.6306	12	12	12	53.6	53.6	53.6	26.366	0	323.31	667240000	373	A0A6N4CSI1	A0A6N4CSI1
A0A6N4CSI2	Inorganic pyrophosphatase (EC 3.6.1.1) (Pyrophosphate phospho-hydrolase) (PPase)	ppa ASJ32_18550 GO994_17850	OTHER	Cytoplasmic	C	Catalyzes the hydrolysis of inorganic pyrophosphate (PPi) forming two phosphate ions	Chromosome	29.6791	29.3238	27.5818	29.2457	24	24	24	64.2	64.2	64.2	19.546	0	323.31	12085000000	2554	A0A6N4CSI2	A0A6N4CSI2
A0A6N4CSI7	Probable cytosol aminopeptidase (EC 3.4.11.1) (Leucine aminopeptidase) (LAP) (EC 3.4.11.10) (Leucyl aminopeptidase)	pepA ASJ32_05900 GO994_19915	OTHER	Cytoplasmic	E	Presumably involved in the processing and regular turnover of intracellular proteins. Catalyzes the removal of unsubstituted N-terminal amino acids from various peptides	Chromosome	27.2936	27.5734	28.0433	27.5812	65	65	65	74.3	74.3	74.3	54.675	0	323.31	12480000000	6070	A0A6N4CSI7	A0A6N4CSI7
A0A6N4CSI8	Phosphoribosylamine--glycine ligase (EC 6.3.4.13) (GARS) (Glycinamide ribonucleotide synthetase) (Phosphoribosylglycinamide synthetase)	purD ASJ32_19715	OTHER	Cytoplasmic	F	Belongs to the GARS family	Chromosome	28.6855	28.672	28.4515	28.0496	58	58	58	91.8	91.8	91.8	45.537	0	323.31	17931000000	5143	A0A6N4CSI8	A0A6N4CSI8
A0A6N4CSJ3	50S ribosomal protein L3	rplC ASJ32_10905 GO994_01145	OTHER	Cytoplasmic	J	One of the primary rRNA binding proteins, it binds directly near the 3'-end of the 23S rRNA, where it nucleates assembly of the 50S subunit	Chromosome	31.2856	31.1586	31.8385	32.4783	48	48	48	95.2	95.2	95.2	22.363	0	323.31	207730000000	19750	A0A6N4CSJ3	A0A6N4CSJ3
A0A6N4CSJ5	Poly(A) polymerase I (PAP I) (EC 2.7.7.19)	pcnB ASJ32_18605	OTHER	Cytoplasmic	J	Adds poly(A) tail to the 3' end of many RNAs, which usually targets these RNAs for decay. Plays a significant role in the global control of gene expression, through influencing the rate of transcript degradation, and in the general RNA quality control	Chromosome	25.9675	25.4882	25.7126	25.5483	63	63	63	76.7	76.7	76.7	56.677	0	323.31	9169900000	2530	A0A6N4CSJ5	A0A6N4CSJ5
A0A6N4CSK5	50S ribosomal protein L14	rplN ASJ32_10955 GO994_01195	OTHER	Cytoplasmic	J	Binds to 23S rRNA. Forms part of two intersubunit bridges in the 70S ribosome	Chromosome	26.2594	26.1728	26.421	26.9076	28	28	28	99.2	99.2	99.2	13.403	0	323.31	49626000000	9154	A0A6N4CSK5	A0A6N4CSK5
A0A6N4CSL1	dITP/XTP pyrophosphatase (EC 3.6.1.66) (Non-canonical purine NTP pyrophosphatase) (Non-standard purine NTP pyrophosphatase) (Nucleoside-triphosphate diphosphatase) (Nucleoside-triphosphate pyrophosphatase) (NTPase)	rdgB ASJ32_19745 GO994_04085	OTHER	Cytoplasmic	F	Pyrophosphatase that catalyzes the hydrolysis of nucleoside triphosphates to their monophosphate derivatives, with a high preference for the non-canonical purine nucleotides XTP (xanthosine triphosphate), dITP (deoxyinosine triphosphate) and ITP. Seems to function as a house-cleaning enzyme that removes non-canonical purine nucleotides from the nucleotide pool, thus preventing their incorporation…	Chromosome	25.1085	24.8431	23.8751	24.57	16	16	16	82.3	82.3	82.3	21.526	0	149.11	694200000	287	A0A6N4CSL1	A0A6N4CSL1
A0A6N4CSL4	30S ribosomal protein S13	rpsM ASJ32_11005 GO994_01255	OTHER	Cytoplasmic	J	Located at the top of the head of the 30S subunit, it contacts several helices of the 16S rRNA. In the 70S ribosome it contacts the 23S rRNA (bridge B1a) and protein L5 of the 50S subunit (bridge B1b), connecting the 2 subunits	Chromosome	31.099	31.2569	31.4959	31.6321	27	27	27	84.7	84.7	84.7	13.2	0	323.31	64539000000	7987	A0A6N4CSL4	A0A6N4CSL4
A0A6N4CSL5	DNA-directed RNA polymerase subunit delta	ASJ32_15885	SP(Sec/SPI)	Unknown	S	S-adenosyl-l-methionine hydroxide adenosyltransferase	Chromosome	26.3243	26.8075	26.2329	25.4734	29	29	29	74.2	74.2	74.2	32.729	0	323.31	3741700000	1171	A0A6N4CSL5	A0A6N4CSL5
A0A6N4CSL6	2-amino-4-hydroxy-6-hydroxymethyldihydropteridine pyrophosphokinase (EC 2.7.6.3) (6-hydroxymethyl-7,8-dihydropterin pyrophosphokinase)	folK ASJ32_18600 GO994_17800	OTHER	Cytoplasmic	H	7,8-dihydro-6-hydroxymethylpterin-pyrophosphokinase (HPPK)	Chromosome	22.7176	NaN	21.59	22.4818	8	8	8	68.5	68.5	68.5	17.961	0	85.572	193420000	153	A0A6N4CSL6	A0A6N4CSL6
A0A6N4CSL9	4-hydroxy-tetrahydrodipicolinate reductase (HTPA reductase) (EC 1.17.1.8)	dapB ASJ32_19545 GO994_08040	OTHER	Cytoplasmic	E	Catalyzes the conversion of 4-hydroxy- tetrahydrodipicolinate (HTPA) to tetrahydrodipicolinate	Chromosome	25.6638	25.1389	25.81	25.4706	27	27	27	82.2	82.2	82.2	28.659	0	323.31	3447600000	1158	A0A6N4CSL9	A0A6N4CSL9
A0A6N4CSM0	Diaminopimelate epimerase (DAP epimerase) (EC 5.1.1.7) (PLP-independent amino acid racemase)	dapF ASJ32_05185 GO994_19270	OTHER	Cytoplasmic	E	Catalyzes the stereoinversion of LL-2,6- diaminoheptanedioate (L,L-DAP) to meso-diaminoheptanedioate (meso- DAP), a precursor of L-lysine and an essential component of the bacterial peptidoglycan	Chromosome	24.1351	24.7088	24.5377	23.4609	18	18	18	70.3	70.3	70.3	30.363	0	323.31	1185400000	443	A0A6N4CSM0	A0A6N4CSM0
A0A6N4CSM1	Uncharacterized protein	ASJ32_19710 GO994_04050	SP(Sec/SPI)	Unknown	C	electron transfer activity	Chromosome	25.5308	25.6229	25.588	25.7979	23	23	23	70.2	70.2	70.2	13.887	0	323.31	3688300000	965	A0A6N4CSM1	A0A6N4CSM1
A0A6N4CSM6	Ubiquinone/menaquinone biosynthesis C-methyltransferase UbiE (EC 2.1.1.163) (EC 2.1.1.201) (2-methoxy-6-polyprenyl-1,4-benzoquinol methylase) (Demethylmenaquinone methyltransferase)	ubiE ASJ32_15240 GO994_21930	OTHER	Cytoplasmic	H	Methyltransferase required for the conversion of demethylmenaquinol (DMKH2) to menaquinol (MKH2) and the conversion of 2-polyprenyl-6-methoxy-1,4-benzoquinol (DDMQH2) to 2- polyprenyl-3-methyl-6-methoxy-1,4-benzoquinol (DMQH2)	Chromosome	23.2785	23.001	23.5109	23.9623	27	27	27	94	94	94	27.74	0	323.31	3640500000	1191	A0A6N4CSM6	A0A6N4CSM6
A0A6N4CSN0	2OG-Fe(II) oxygenase (Isopenicillin N synthase family oxygenase)	ASJ32_18285 GO994_03445	OTHER	Cytoplasmic	C	Belongs to the iron ascorbate-dependent oxidoreductase family	Chromosome	23.6202	23.5588	22.0048	23.5194	21	21	21	65.2	65.2	65.2	31.644	0	173.28	506410000	344	A0A6N4CSN0	A0A6N4CSN0
A0A6N4CSN3	GNAT family N-acetyltransferase (Ribosomal-protein-L7/L12-serine acetyltransferase)	ASJ32_19770 GO994_04115	OTHER	Cytoplasmic	J	Acetyltransferase (GNAT) domain	Chromosome	22.7252	23.5118	23.2839	24.1785	7	7	7	46.2	46.2	46.2	21.229	0	70.915	174270000	80	A0A6N4CSN3	A0A6N4CSN3
A0A6N4CSN7	Phospho-2-dehydro-3-deoxyheptonate aldolase (EC 2.5.1.54)	ASJ32_19580	OTHER	Cytoplasmic	E	Stereospecific condensation of phosphoenolpyruvate (PEP) and D-erythrose-4-phosphate (E4P) giving rise to 3-deoxy-D- arabino-heptulosonate-7-phosphate (DAHP)	Chromosome	24.5582	23.2265	21.8493	24.3662	28	26	26	58.6	58.1	58.1	38.953	0	323.31	1769000000	709	A0A6N4CSN7	A0A6N4CSN7
A0A6N4CSP4	NADH-quinone oxidoreductase subunit F (EC 7.1.1.-)	ASJ32_09995	OTHER	Cytoplasmic	C	NDH-1 shuttles electrons from NADH, via FMN and iron- sulfur (Fe-S) centers, to quinones in the respiratory chain	Chromosome	21.8462	21.3336	22.4284	22.0016	24	24	24	70.3	70.3	70.3	50.164	0	91.278	89656000	116	A0A6N4CSP4	A0A6N4CSP4
A0A6N4CSQ0	Carbamoyl-phosphate synthase small chain (EC 6.3.5.5) (Carbamoyl-phosphate synthetase glutamine chain)	carA ASJ32_19540 GO994_08045	OTHER	Cytoplasmic	F	Carbamoyl-phosphate synthetase glutamine chain	Chromosome	26.9254	26.8839	27.5473	27.3315	34	34	34	75.5	75.5	75.5	41.484	0	323.31	9545200000	2608	A0A6N4CSQ0	A0A6N4CSQ0
A0A6N4CSQ2	Ubiquinone biosynthesis accessory factor UbiK	ubiK ASJ32_15340 GO994_21830	OTHER	Unknown	S	Membrane fusogenic activity	Chromosome	23.7717	24.4901	26.2578	25.456	17	17	17	95.3	95.3	95.3	9.7252	0	171.14	670960000	321	A0A6N4CSQ2	A0A6N4CSQ2
A0A6N4CSQ4	O-acetylhomoserine aminocarboxypropyltransferase (EC 2.5.1.49)	ASJ32_05345	OTHER	Cytoplasmic	E	Cys/Met metabolism PLP-dependent enzyme	Chromosome	26.62	26.7117	26.614	27.1987	30	30	30	81.3	81.3	81.3	45.018	0	323.31	9407400000	2204	A0A6N4CSQ4	A0A6N4CSQ4
A0A6N4CSQ8	Dipeptidase (EC 3.4.-.-)	ASJ32_19970 GO994_13365	LIPO(Sec/SPII)	Unknown	E	Peptidase family C69	Chromosome	24.7769	24.767	25.085	24.8019	53	53	53	77.1	77.1	77.1	55.589	0	323.31	2097800000	1450	A0A6N4CSQ8	A0A6N4CSQ8
A0A6N4CSR2	Leucine ABC transporter substrate-binding protein	ASJ32_15390	SP(Sec/SPI)	Periplasmic	E	Leucine ABC transporter subunit substrate-binding protein LivK	Chromosome	25.4522	25.52	26.1648	25.4188	40	40	40	86.6	86.6	86.6	38.954	0	323.31	2767200000	1136	A0A6N4CSR2	A0A6N4CSR2
A0A6N4CSR4	6-carboxy-5,6,7,8-tetrahydropterin synthase (EC 4.1.2.50) (Queuosine biosynthesis protein QueD)	ASJ32_10100	OTHER	Cytoplasmic	H	6-pyruvoyl tetrahydropterin synthase	Chromosome	22.5823	22.645	22.528	21.9552	16	16	16	48.8	48.8	48.8	32.62	0	252.63	317440000	274	A0A6N4CSR4	A0A6N4CSR4
A0A6N4CSR8	IU_nuc_hydro domain-containing protein	ASJ32_17945	OTHER	CytoplasmicMembrane	F	Inosine-uridine preferring nucleoside hydrolase	Chromosome	22.3777	22.2916	22.8626	22.7475	8	8	8	39.2	39.2	39.2	33.187	0	243.41	64095000	77	A0A6N4CSR8	A0A6N4CSR8
A0A6N4CSS1	Isochorismatase	ASJ32_19470	OTHER	Unknown	Q	Isochorismatase family	Chromosome	22.9328	22.3468	NaN	22.3773	7	7	7	79.3	79.3	79.3	18.73	0	108.11	152410000	100	A0A6N4CSS1	A0A6N4CSS1
A0A6N4CSS3	Gamma-glutamyltransferase	ASJ32_19165	LIPO(Sec/SPII)	Periplasmic	M	Gamma-glutamyltranspeptidase	Chromosome	22.9004	23.2239	NaN	23.0507	36	36	36	61.6	61.6	61.6	61.964	0	323.31	3020000000	1664	A0A6N4CSS3	A0A6N4CSS3
A0A6N4CSS5	Uridine phosphorylase (EC 2.4.2.3)	ASJ32_17935 GO994_07380	OTHER	Cytoplasmic	F	Catalyzes the reversible phosphorylytic cleavage of uridine and deoxyuridine to uracil and ribose- or deoxyribose-1- phosphate. The produced molecules are then utilized as carbon and energy sources or in the rescue of pyrimidine bases for nucleotide synthesis	Chromosome	24.1658	24.614	24.1582	23.2825	19	19	19	64.5	64.5	64.5	26.861	0	323.31	799950000	564	A0A6N4CSS5	A0A6N4CSS5
A0A6N4CST2	OmpA-like domain-containing protein	ASJ32_15490	LIPO(Sec/SPII)	CytoplasmicMembrane	M	Belongs to the ompA family	Chromosome	22.579	23.1212	23.661	23.6111	22	22	22	71.6	71.6	71.6	21.991	0	323.31	17100000000	3955	A0A6N4CST2	A0A6N4CST2
A0A6N4CST3	Phosphoenolpyruvate-protein phosphotransferase (EC 2.7.3.9) (Phosphotransferase system, enzyme I)	ASJ32_19215	OTHER	Cytoplasmic	G	General (non sugar-specific) component of the phosphoenolpyruvate-dependent sugar phosphotransferase system (sugar PTS). This major carbohydrate active-transport system catalyzes the phosphorylation of incoming sugar substrates concomitantly with their translocation across the cell membrane. Enzyme I transfers the phosphoryl group from phosphoenolpyruvate (PEP) to the phosphoryl carrier protein (…	Chromosome	28.609	29.0454	28.4318	28.2856	73	73	73	88.5	88.5	88.5	63.707	0	323.31	25767000000	5797	A0A6N4CST3	A0A6N4CST3
A0A6N4CST7	Pilus assembly protein FimV	ASJ32_19435 GO994_13480	SP(Sec/SPI)	Unknown	NU	COG3170 Tfp pilus assembly protein FimV	Chromosome	22.7157	21.5239	22.8427	24.7704	36	36	36	48.2	48.2	48.2	76.155	0	323.31	3437800000	1107	A0A6N4CST7	A0A6N4CST7
A0A6N4CST8	dTDP-4-dehydrorhamnose reductase (EC 1.1.1.133)	rfbD ASJ32_19865 GO994_15780	OTHER	Cytoplasmic	M	Catalyzes the reduction of dTDP-6-deoxy-L-lyxo-4- hexulose to yield dTDP-L-rhamnose	Chromosome	25.6078	26.1987	25.5004	25.8538	20	20	20	90.5	90.5	90.5	32.059	0	323.31	2645800000	736	A0A6N4CST8	A0A6N4CST8
A0A6N4CST9	ABC transporter ATP-binding protein	ASJ32_20665 GO994_03630	OTHER	Cytoplasmic	S	of ABC transporters with duplicated ATPase domains	Chromosome	24.4646	22.0596	NaN	22.9708	35	35	35	47	47	47	70.668	0	323.31	897560000	565	A0A6N4CST9	A0A6N4CST9
A0A6N4CSU2	Xaa-Pro dipeptidase (X-Pro dipeptidase) (EC 3.4.13.9) (Imidodipeptidase) (Proline dipeptidase) (Prolidase)	pepQ ASJ32_15540	OTHER	Cytoplasmic	E	Splits dipeptides with a prolyl residue in the C- terminal position	Chromosome	21.875	22.5136	NaN	23.0516	23	23	23	61.1	61.1	61.1	50.19	0	323.31	828470000	508	A0A6N4CSU2	A0A6N4CSU2
A0A6N4CSU3	Transposase	ASJ32_10265	OTHER	Unknown	L	Transposase	Chromosome	21.0723	21.1186	21.707	21.9526	9	9	3	74.5	74.5	38.2	11.764	0.00042553	22.035	216180000	70	A0A6N4CSU3	A0A6N4CSU3
A0A6N4CSV0	tRNA (N6-threonylcarbamoyladenosine(37)-N6)-methyltransferase TrmO (tRNA-Thr(GGU) m(6)t(6)A37 methyltransferase TsaA)	tsaA ASJ32_19245 GO994_16520	OTHER	Cytoplasmic	S	Uncharacterised protein family UPF0066	Chromosome	23.7721	23.303	23.9671	24.2153	14	14	14	60.7	60.7	60.7	26.327	0	54.803	320770000	209	A0A6N4CSV0	A0A6N4CSV0
A0A6N4CSW4	PTS glucose transporter subunit IIA	ASJ32_19210	OTHER	Cytoplasmic	G	Pts system	Chromosome	28.5645	28.5212	29.2304	27.8224	24	24	24	80.5	80.5	80.5	18.118	0	323.31	11007000000	2220	A0A6N4CSW4	A0A6N4CSW4
A0A6N4CSW6	RNA helicase	ASJ32_10370	OTHER	Cytoplasmic	L	Belongs to the DEAD box helicase family	Chromosome	25.7294	24.3745	25.9291	26.7538	57	57	57	88.6	88.6	88.6	47.815	0	323.31	15198000000	3216	A0A6N4CSW6	A0A6N4CSW6
A0A6N4CSW9	HAD family hydrolase	ASJ32_05225	OTHER	Unknown	S	Sucrose-6F-phosphate phosphohydrolase	Chromosome	25.3467	25.6687	25.7396	25.2033	21	21	21	69.5	69.5	69.5	29.031	0	323.31	1580900000	717	A0A6N4CSW9	A0A6N4CSW9
A0A6N4CSX0	Ketol-acid reductoisomerase (NADP(+)) (KARI) (EC 1.1.1.86) (Acetohydroxy-acid isomeroreductase) (AHIR) (Alpha-keto-beta-hydroxylacyl reductoisomerase)	ilvC ASJ32_18930	OTHER	Cytoplasmic	EH	Involved in the biosynthesis of branched-chain amino acids (BCAA). Catalyzes an alkyl-migration followed by a ketol- acid reduction of (S)-2-acetolactate (S2AL) to yield (R)-2,3- dihydroxy-isovalerate. In the isomerase reaction, S2AL is rearranged via a Mg-dependent methyl migration to produce 3- hydroxy-3-methyl-2-ketobutyrate (HMKB). In the reductase reaction, this 2-ketoacid undergoes a metal-…	Chromosome	30.7036	31.1884	30.8674	30.5936	82	82	82	98.6	98.6	98.6	53.84	0	323.31	128280000000	21487	A0A6N4CSX0	A0A6N4CSX0
A0A6N4CSX1	Heat shock protein 15	hslR ASJ32_05650 GO994_20165	OTHER	Cytoplasmic	J	Belongs to the HSP15 family	Chromosome	22.0983	21.7547	22.873	23.6634	17	17	17	72.7	72.7	72.7	15.393	0	186.78	203490000	178	A0A6N4CSX1	A0A6N4CSX1
A0A6N4CSX7	Uncharacterized protein	ASJ32_17560	SP(Sec/SPI)	Unknown	P	Protein of unknown function (DUF2796)	Chromosome	28.9248	28.4937	27.9615	28.1368	11	11	11	42.6	42.6	42.6	20.193	0	323.31	5050100000	1047	A0A6N4CSX7	A0A6N4CSX7
A0A6N4CSY2	Threonine synthase (EC 4.2.3.1)	ASJ32_19330	OTHER	Cytoplasmic	E	Threonine synthase	Chromosome	26.4011	26.2693	25.5566	25.6994	43	42	42	87.7	87.7	87.7	45.963	0	323.31	5876000000	1859	A0A6N4CSY2	A0A6N4CSY2
A0A6N4CSZ3	tRNA (guanosine(18)-2'-O)-methyltransferase (EC 2.1.1.34) (tRNA [Gm18] methyltransferase)	trmH ASJ32_09440 GO994_00175	OTHER	Cytoplasmic	J	Catalyzes the 2'-O methylation of guanosine at position 18 in tRNA	Chromosome	23.8407	23.7343	25.1675	24.1354	19	19	19	76.2	76.2	76.2	27.844	0	323.31	953180000	573	A0A6N4CSZ3	A0A6N4CSZ3
A0A6N4CSZ4	23S rRNA (uracil(1939)-C(5))-methyltransferase RlmD (EC 2.1.1.190) (23S rRNA(m5U1939)-methyltransferase)	rumA rlmD ASJ32_17720	OTHER	Cytoplasmic	J	Catalyzes the formation of 5-methyl-uridine at position 1939 (m5U1939) in 23S rRNA	Chromosome	23.1294	23.9449	23.3203	23.2848	33	33	33	77.7	77.7	77.7	48.418	0	323.31	1606400000	819	A0A6N4CSZ4	A0A6N4CSZ4
A0A6N4CSZ5	Cystathionine gamma-synthase (O-succinylhomoserine (Thiol)-lyase) (EC 2.5.1.48)	metB ASJ32_05760 GO994_20055	OTHER	Cytoplasmic	E	Cys/Met metabolism PLP-dependent enzyme	Chromosome	26.6402	26.8608	27.1958	27.1484	20	20	20	61.3	61.3	61.3	41.471	0	323.31	5067400000	1333	A0A6N4CSZ5	A0A6N4CSZ5
A0A6N4CSZ7	ADP-heptose--LPS heptosyltransferase (Lipopolysaccharide heptosyltransferase family protein)	ASJ32_18995 GO994_00490	OTHER	Cytoplasmic	M	Glycosyltransferase family 9 (heptosyltransferase)	Chromosome	22.1112	22.5786	22.9226	22.0152	24	24	24	64.8	64.8	64.8	38.629	0	323.31	2541000000	832	A0A6N4CSZ7	A0A6N4CSZ7
A0A6N4CT05	DUF1456 family protein	ASJ32_17710 GO994_03915	OTHER	Unknown	S	Protein of unknown function (DUF1456)	Chromosome	25.644	26.3467	25.8795	25.1768	21	21	21	67.3	67.3	67.3	18.116	0	323.31	2092900000	940	A0A6N4CT05	A0A6N4CT05
A0A6N4CT14	Alpha-aspartyl dipeptidase	ASJ32_04210	OTHER	Cytoplasmic	E	Hydrolyzes dipeptides containing N-terminal aspartate residues. May play a role in allowing the cell to use peptide aspartate to spare carbon otherwise required for the synthesis of the aspartate family of amino acids	Chromosome	23.8414	24.4409	24.0998	23.6748	15	15	15	60.6	60.6	60.6	27.202	0	323.31	354290000	192	A0A6N4CT14	A0A6N4CT14
A0A6N4CT16	5'-nucleotidase SurE (EC 3.1.3.5) (Nucleoside 5'-monophosphate phosphohydrolase)	surE ASJ32_17765 GO994_03970	OTHER	Cytoplasmic	S	Nucleotidase that shows phosphatase activity on nucleoside 5'-monophosphates	Chromosome	24.9405	24.5048	25.1548	25.3782	13	13	13	48.4	48.4	48.4	26.272	0	238.8	512620000	202	A0A6N4CT16	A0A6N4CT16
A0A6N4CT22	Ribosome maturation factor RimP	rimP ASJ32_04270 GO994_05260	OTHER	Cytoplasmic	S	Required for maturation of 30S ribosomal subunits	Chromosome	26.544	26.4334	25.6537	25.2484	10	10	10	47.4	47.4	47.4	16.799	0	260.53	1531200000	531	A0A6N4CT22	A0A6N4CT22
A0A6N4CT23	Probable septum site-determining protein MinC	minC ASJ32_14575 GO994_12495	OTHER	Cytoplasmic	D	Cell division inhibitor that blocks the formation of polar Z ring septums. Rapidly oscillates between the poles of the cell to destabilize FtsZ filaments that have formed before they mature into polar Z rings. Prevents FtsZ polymerization	Chromosome	24.5202	24.0768	24.8309	25.1908	12	12	12	49.2	49.2	49.2	25.275	0	248.68	410030000	282	A0A6N4CT23	A0A6N4CT23
A0A6N4CT33	Translation initiation factor IF-2	infB ASJ32_04260	OTHER	Cytoplasmic	J	One of the essential components for the initiation of protein synthesis. Protects formylmethionyl-tRNA from spontaneous hydrolysis and promotes its binding to the 30S ribosomal subunits. Also involved in the hydrolysis of GTP during the formation of the 70S ribosomal complex	Chromosome	29.1775	28.4445	28.4955	29.5288	171	171	171	97.2	97.2	97.2	98.375	0	323.31	98386000000	18908	A0A6N4CT33	A0A6N4CT33
A0A6N4CT42	tRNA uridine 5-carboxymethylaminomethyl modification enzyme MnmG (Glucose-inhibited division protein A)	gidA mnmG ASJ32_09740	OTHER	Cytoplasmic	D	NAD-binding protein involved in the addition of a carboxymethylaminomethyl (cmnm) group at the wobble position (U34) of certain tRNAs, forming tRNA-cmnm(5)s(2)U34	Chromosome	27.1382	26.9358	27.4359	27.1337	65	65	65	77.7	77.7	77.7	69.881	0	323.31	8500300000	2535	A0A6N4CT42	A0A6N4CT42
A0A6N4CT43	Transcription elongation factor GreA (Transcript cleavage factor GreA)	greA ASJ32_04325 GO994_05205	OTHER	Cytoplasmic	K	Necessary for efficient RNA polymerase transcription elongation past template-encoded arresting sites. The arresting sites in DNA have the property of trapping a certain fraction of elongating RNA polymerases that pass through, resulting in locked ternary complexes. Cleavage of the nascent transcript by cleavage factors such as GreA or GreB allows the resumption of elongation from the new 3'termi…	Chromosome	26.9084	26.8904	26.0759	25.8797	25	25	25	89.9	89.9	89.9	17.611	0	323.31	2301800000	785	A0A6N4CT43	A0A6N4CT43
A0A6N4CT45	HTH-type transcriptional regulator ArgP	argP ASJ32_05590 GO994_20225	OTHER	Cytoplasmic	K	transcriptional regulator, ArgP	Chromosome	20.2255	20.9156	21.8402	21.2659	9	9	9	41.8	41.8	41.8	33.41	0	170.48	124710000	152	A0A6N4CT45	A0A6N4CT45
A0A6N4CT46	4-alpha-glucanotransferase (EC 2.4.1.25) (Amylomaltase) (Disproportionating enzyme)	ASJ32_18500	OTHER	Cytoplasmic	G	4-alpha-glucanotransferase	Chromosome	25.387	26.0163	26.2427	25.7309	51	51	51	77.5	77.5	77.5	81.038	0	323.31	3124300000	1244	A0A6N4CT46	A0A6N4CT46
A0A6N4CT47	ABC transporter (ATP-binding cassette domain-containing protein)	ASJ32_18575 GO994_17825	OTHER	CytoplasmicMembrane	V	AAA domain, putative AbiEii toxin, Type IV TA system	Chromosome	21.7018	22.4165	22.1715	22.2689	34	34	34	82	82	82	34.13	0	323.31	1534600000	790	A0A6N4CT47	A0A6N4CT47
A0A6N4CT49	ABC transporter ATP-binding protein (Dipeptide ABC transporter ATP-binding protein)	ASJ32_04380 GO994_05155	OTHER	CytoplasmicMembrane	P	Belongs to the ABC transporter superfamily	Chromosome	23.9652	23.3748	25.4155	25.5314	48	48	47	75.1	75.1	73.9	63.717	0	323.31	1476900000	661	A0A6N4CT49	A0A6N4CT49
A0A6N4CT50	Asparagine synthase (glutamine-hydrolyzing) (EC 6.3.5.4)	asnB ASJ32_19975	OTHER	Cytoplasmic	E	asparagine synthase (glutamine-hydrolyzing)	Chromosome	27.5653	27.4886	27.7507	27.6834	68	68	68	83.4	83.4	83.4	62.637	0	323.31	14720000000	3860	A0A6N4CT50	A0A6N4CT50
A0A6N4CT52	Phosphoenolpyruvate carboxykinase (ATP) (PCK) (PEP carboxykinase) (PEPCK) (EC 4.1.1.49)	pckA ASJ32_05640	OTHER	Cytoplasmic	H	Involved in the gluconeogenesis. Catalyzes the conversion of oxaloacetate (OAA) to phosphoenolpyruvate (PEP) through direct phosphoryl transfer between the nucleoside triphosphate and OAA	Chromosome	27.9699	28.1209	27.4332	27.3641	73	73	73	91.1	91.1	91.1	59.795	0	323.31	6524600000	2492	A0A6N4CT52	A0A6N4CT52
A0A6N4CT53	UDP-N-acetylmuramate--L-alanyl-gamma-D-glutamyl-meso-2,6-diaminoheptandioate ligase (EC 6.3.2.45) (Murein peptide ligase) (UDP-N-acetylmuramate:L-alanyl-gamma-D-glutamyl-meso-diaminopimelate ligase)	mpl ASJ32_18555 GO994_17845	SP(Sec/SPI)	Cytoplasmic	M	Reutilizes the intact tripeptide L-alanyl-gamma-D- glutamyl-meso-diaminopimelate by linking it to UDP-N- acetylmuramate	Chromosome	25.7704	26.4091	26.067	25.7113	27	27	27	68.9	68.9	68.9	50.314	0	323.31	3210200000	1014	A0A6N4CT53	A0A6N4CT53
A0A6N4CT54	ATP synthase subunit beta (EC 7.1.2.2) (ATP synthase F1 sector subunit beta) (F-ATPase subunit beta)	atpD ASJ32_09795 GO994_22050	OTHER	Cytoplasmic	C	Produces ATP from ADP in the presence of a proton gradient across the membrane. The catalytic sites are hosted primarily by the beta subunits	Chromosome	30.7087	30.3989	31.1095	31.2379	64	64	64	97	97	97	50.362	0	323.31	94797000000	16794	A0A6N4CT54	A0A6N4CT54
A0A6N4CT59	ATP-dependent RNA helicase DeaD (EC 3.6.4.13) (Cold-shock DEAD box protein A)	deaD csdA ASJ32_20030	OTHER	Cytoplasmic	JKL	DEAD-box RNA helicase involved in various cellular processes at low temperature, including ribosome biogenesis, mRNA degradation and translation initiation	Chromosome	30.3101	29.8767	29.4876	31.1756	107	107	107	98.4	98.4	98.4	68.518	0	323.31	165100000000	22543	A0A6N4CT59	A0A6N4CT59
A0A6N4CT63	Glutamate-1-semialdehyde 2,1-aminomutase (GSA) (EC 5.4.3.8) (Glutamate-1-semialdehyde aminotransferase) (GSA-AT)	hemL ASJ32_18685 GO994_17715	OTHER	Cytoplasmic	H	Glutamate-1-semialdehyde aminotransferase	Chromosome	22.2457	21.17	23.0549	23.4005	22	22	22	42.5	42.5	42.5	45.935	0	323.31	1956100000	985	A0A6N4CT63	A0A6N4CT63
A0A6N4CT70	L,D-transpeptidase	ASJ32_18205	SP(Sec/SPI)	Unknown	M	L,D-transpeptidase catalytic domain	Chromosome	24.0184	23.7558	24.1337	23.6788	22	22	22	68.2	68.2	68.2	33.686	0	323.31	408680000	392	A0A6N4CT70	A0A6N4CT70
A0A6N4CT72	RNA polymerase-associated protein RapA (EC 3.6.4.-) (ATP-dependent helicase HepA)	rapA ASJ32_19845 GO994_04190	OTHER	Cytoplasmic	K	Transcription regulator that activates transcription by stimulating RNA polymerase (RNAP) recycling in case of stress conditions such as supercoiled DNA or high salt concentrations. Probably acts by releasing the RNAP, when it is trapped or immobilized on tightly supercoiled DNA. Does not activate transcription on linear DNA. Probably not involved in DNA repair	Chromosome	25.1371	25.206	25.574	25.5274	72	72	72	72.8	72.8	72.8	107.32	0	323.31	7478800000	2852	A0A6N4CT72	A0A6N4CT72
A0A6N4CT74	Uncharacterized protein	ASJ32_01700	SP(Sec/SPI)	Unknown	-	-	Chromosome	23.7531	24.2192	24.5191	23.6711	15	15	15	80.6	80.6	80.6	16.391	0	323.31	385650000	234	A0A6N4CT74	A0A6N4CT74
A0A6N4CT76	Hypoxanthine phosphoribosyltransferase (EC 2.4.2.8)	hpt ASJ32_18570 GO994_17830	OTHER	Cytoplasmic	F	Belongs to the purine pyrimidine phosphoribosyltransferase family	Chromosome	26.7162	26.4103	25.9126	26.028	23	23	23	96.6	96.6	96.6	19.623	0	323.31	2933800000	1052	A0A6N4CT76	A0A6N4CT76
A0A6N4CT81	Chemotaxis protein	ASJ32_04610	OTHER	CytoplasmicMembrane	NT	Cache domain	Chromosome	22.5749	21.8188	22.8169	23.8012	52	52	50	70.8	70.8	70.8	66.463	0	323.31	8020000000	2370	A0A6N4CT81	A0A6N4CT81
A0A6N4CT82	Ribose-5-phosphate isomerase A (EC 5.3.1.6) (Phosphoriboisomerase A) (PRI)	rpiA ASJ32_19565 GO994_08020	OTHER	Cytoplasmic	G	Catalyzes the reversible conversion of ribose-5- phosphate to ribulose 5-phosphate	Chromosome	27.4226	27.3168	28.2631	27.1008	28	28	28	76	76	76	23.01	0	323.31	3178100000	662	A0A6N4CT82	A0A6N4CT82
A0A6N4CT83	Asparaginase (EC 3.5.1.1)	ansA ASJ32_04600	OTHER	Cytoplasmic	EJ	Asparaginase	Chromosome	24.1427	23.8465	23.8237	24.3242	8	8	8	34.3	34.3	34.3	37.672	0	323.31	407560000	293	A0A6N4CT83	A0A6N4CT83
A0A6N4CT87	Probable phosphatase ASJ32_14100 (EC 3.1.3.-)	ASJ32_14100	OTHER	Cytoplasmic	E	zinc ion binding	Chromosome	23.2306	23.1355	22.2743	22.5734	16	16	16	72.4	72.4	72.4	27.254	0	83.523	763240000	530	A0A6N4CT87	A0A6N4CT87
A0A6N4CT88	DUF3369 domain-containing protein (Phosphodiesterase)	ASJ32_18660 GO994_17740	OTHER	Cytoplasmic	T	Domain of unknown function (DUF3369)	Chromosome	23.5868	23.3051	24.0079	24.0266	24	24	24	60.1	60.1	60.1	58.416	0	323.31	635770000	348	A0A6N4CT88	A0A6N4CT88
A0A6N4CT89	DUF4357 domain-containing protein	ASJ32_01755 GO994_13655	OTHER	Unknown	S	Domain of unknown function (DUF4357)	Chromosome	25.7696	24.8124	26.0524	26.3204	17	17	17	96.1	96.1	96.1	16.637	0	323.31	789350000	216	A0A6N4CT89	A0A6N4CT89
A0A6N4CT91	Diaminopimelate decarboxylase (DAP decarboxylase) (DAPDC) (EC 4.1.1.20)	lysA ASJ32_05180	OTHER	Cytoplasmic	E	Specifically catalyzes the decarboxylation of meso- diaminopimelate (meso-DAP) to L-lysine	Chromosome	26.257	26.5885	25.5975	25.4144	44	44	44	92.8	92.8	92.8	45.298	0	323.31	4840100000	1672	A0A6N4CT91	A0A6N4CT91
A0A6N4CT96	Aspartokinase (EC 2.7.2.4)	ASJ32_01820	OTHER	Unknown	E	Belongs to the aspartokinase family	Chromosome	23.7304	21.7311	NaN	22.8733	26	26	26	61.6	61.6	61.6	47.824	0	159.98	886230000	383	A0A6N4CT96	A0A6N4CT96
A0A6N4CT97	AsnC family transcriptional regulator (Winged helix-turn-helix transcriptional regulator)	ASJ32_18310 GO994_03420	OTHER	Cytoplasmic	K	AsnC-type helix-turn-helix domain	Chromosome	23.8356	23.2909	23.5189	22.1534	13	13	13	70.3	70.3	70.3	18.037	0	289.88	279800000	206	A0A6N4CT97	A0A6N4CT97
A0A6N4CTA5	DNA-binding transcriptional repressor (Transcriptional regulator)	srlR gutR ASJ32_18360 GO994_03360	OTHER	Cytoplasmic	K	DeoR C terminal sensor domain	Chromosome	22.3808	22.4675	21.7254	21.9516	16	16	16	65	65	65	28.161	0	167.78	107260000	114	A0A6N4CTA5	A0A6N4CTA5
A0A6N4CTB5	Uncharacterized protein	ASJ32_18255	LIPO(Sec/SPII)	Unknown	S	Mediates coordination of peptidoglycan synthesis and outer membrane constriction during cell division	Chromosome	24.525	24.9095	25.4928	25.0647	44	44	44	61.8	61.8	61.8	75.204	0	323.31	1414100000	854	A0A6N4CTB5	A0A6N4CTB5
A0A6N4CTC7	Aldehyde reductase	ASJ32_05335	OTHER	Cytoplasmic	C	alcohol dehydrogenase	Chromosome	25.1646	25.8655	24.8846	24.8878	16	16	16	52	52	52	41.354	0	323.31	1783200000	721	A0A6N4CTC7	A0A6N4CTC7
A0A6N4CTD2	Collagenase	ASJ32_05395 GO994_19485	SP(Sec/SPI)	Extracellular	E	COG3291 FOG PKD repeat	Chromosome	23.4588	23.6213	22.6754	22.8789	79	79	79	68.2	68.2	68.2	103.48	0	323.31	6478200000	5601	A0A6N4CTD2	A0A6N4CTD2
A0A6N4CTD3	Uncharacterized protein	ASJ32_19455	SP(Sec/SPI)	CytoplasmicMembrane	P	NLPA lipoprotein	Chromosome	25.8271	26.3568	26.6992	25.9561	24	24	24	76.1	76.1	76.1	30.038	0	323.31	2143900000	1099	A0A6N4CTD3	A0A6N4CTD3
A0A6N4CTD4	Bifunctional purine biosynthesis protein PurH [Includes: Phosphoribosylaminoimidazolecarboxamide formyltransferase (EC 2.1.2.3) (AICAR transformylase); IMP cyclohydrolase (EC 3.5.4.10) (ATIC) (IMP synthase) (Inosinicase)]	purH ASJ32_19720	OTHER	Cytoplasmic	F	Bifunctional purine biosynthesis protein PurH	Chromosome	29.9061	29.9606	29.6909	29.864	69	69	69	87.2	87.2	87.2	56.833	0	323.31	45000000000	10102	A0A6N4CTD4	A0A6N4CTD4
A0A6N4CTD8	Xanthine-guanine phosphoribosyltransferase (XGPRT) (EC 2.4.2.22) (Xanthine phosphoribosyltransferase)	gpt ASJ32_04860 GO994_04650	OTHER	Cytoplasmic	F	Acts on guanine, xanthine and to a lesser extent hypoxanthine	Chromosome	27.4702	27.2641	26.9761	27.1441	19	19	19	71	71	71	17.396	0	323.31	4812700000	1320	A0A6N4CTD8	A0A6N4CTD8
A0A6N4CTE3	Sec translocon accessory complex subunit YajC	yajC ASJ32_02030 GO994_10140	OTHER	CytoplasmicMembrane	U	Preprotein translocase	Chromosome	21.3893	21.718	22.6813	22.8015	17	17	17	92.8	92.8	92.8	11.911	0	285.76	5837900000	1956	A0A6N4CTE3	A0A6N4CTE3
A0A6N4CTE6	SAM-dependent methyltransferase	ASJ32_14405	OTHER	Cytoplasmic	J	Belongs to the class I-like SAM-binding methyltransferase superfamily. RsmB NOP family	Chromosome	26.2037	25.939	26.5112	26.5922	56	56	56	92.1	92.1	92.1	44.907	0	323.31	7051400000	2653	A0A6N4CTE6	A0A6N4CTE6
A0A6N4CTF0	Aminomethyltransferase (EC 2.1.2.10) (Glycine cleavage system T protein)	gcvT ASJ32_02080	OTHER	Cytoplasmic	E	The glycine cleavage system catalyzes the degradation of glycine	Chromosome	24.8312	25.1501	25.1714	24.9777	30	30	30	67.1	67.1	67.1	39.691	0	323.31	1229100000	788	A0A6N4CTF0	A0A6N4CTF0
A0A6N4CTF3	Nuclease SbcCD subunit D	sbcD ASJ32_19180	OTHER	Cytoplasmic	L	SbcCD cleaves DNA hairpin structures. These structures can inhibit DNA replication and are intermediates in certain DNA recombination reactions. The complex acts as a 3'- 5' double strand exonuclease that can open hairpins. It also has a 5' single-strand endonuclease activity	Chromosome	23.4691	23.9438	24.0759	24.285	28	28	28	63.2	63.2	63.2	45.454	0	298.22	715040000	420	A0A6N4CTF3	A0A6N4CTF3
A0A6N4CTF5	Phosphatidylserine decarboxylase proenzyme (EC 4.1.1.65) [Cleaved into: Phosphatidylserine decarboxylase alpha chain; Phosphatidylserine decarboxylase beta chain]	psd ASJ32_05010	OTHER	CytoplasmicMembrane	I	Belongs to the phosphatidylserine decarboxylase family. PSD-B subfamily. Prokaryotic type I sub-subfamily	Chromosome	25.0646	24.4381	25.7839	24.9871	21	21	21	73.1	73.1	73.1	31.374	0	323.31	2329600000	771	A0A6N4CTF5	A0A6N4CTF5
A0A6N4CTF6	Cold shock domain-containing protein (Cold-shock protein)	ASJ32_04980 GO994_04500	OTHER	Cytoplasmic	K	'Cold-shock' DNA-binding domain	Chromosome	26.5271	26.2441	26.0471	24.9866	12	12	12	100	100	100	7.6375	0	323.31	1914300000	563	A0A6N4CTF6	A0A6N4CTF6
A0A6N4CTG1	Uncharacterized protein	ASJ32_03110 GO994_20505	OTHER	Cytoplasmic	-	-	Chromosome	23.6353	22.8817	22.725	21.9553	11	11	11	43.9	43.9	43.9	29.238	0	172.15	199220000	162	A0A6N4CTG1	A0A6N4CTG1
A0A6N4CTG2	D-alanyl-D-alanine carboxypeptidase family protein (Peptidase M15)	ASJ32_17995 GO994_07460	OTHER	Unknown	M	D-alanyl-D-alanine carboxypeptidase	Chromosome	21.8196	22.1657	22.393	21.507	7	7	7	40.6	40.6	40.6	25.745	0	71.244	65697000	50	A0A6N4CTG2	A0A6N4CTG2
A0A6N4CTH5	tRNA (guanine-N(7)-)-methyltransferase (EC 2.1.1.33) (tRNA (guanine(46)-N(7))-methyltransferase) (tRNA(m7G46)-methyltransferase)	trmB ASJ32_05115	OTHER	Cytoplasmic	J	Catalyzes the formation of N(7)-methylguanine at position 46 (m7G46) in tRNA	Chromosome	24.0272	23.4611	24.5473	25.1394	11	11	11	42.2	42.2	42.2	26.685	0	323.31	2587900000	840	A0A6N4CTH5	A0A6N4CTH5
A0A6N4CTH9	Diguanylate phosphodiesterase	ASJ32_02260	OTHER	CytoplasmicMembrane	T	signal transduction protein containing a membrane domain, an EAL and a GGDEF domain	Chromosome	23.4669	22.2016	23.322	23.8332	35	35	35	48.2	48.2	48.2	109.28	0	323.31	760860000	511	A0A6N4CTH9	A0A6N4CTH9
A0A6N4CTI0	High-affinity zinc uptake system protein ZnuA	ASJ32_03210	SP(Sec/SPI)	Periplasmic	P	Belongs to the bacterial solute-binding protein 9 family	Chromosome	27.4778	27.8961	26.7996	27.6979	22	22	22	57.2	57.2	57.2	33.99	0	323.31	7074500000	1926	A0A6N4CTI0	A0A6N4CTI0
A0A6N4CTI2	Helix-turn-helix domain-containing protein	ASJ32_17955 GO994_07400	OTHER	Unknown	S	protein conserved in bacteria	Chromosome	23.5106	23.375	24.2389	24.3389	7	7	7	85.7	85.7	85.7	10.865	0	269.8	317830000	160	A0A6N4CTI2	A0A6N4CTI2
A0A6N4CTI4	RNA pseudouridine synthase (TIGR01621 family pseudouridine synthase)	ASJ32_19380 GO994_13415	OTHER	Cytoplasmic	J	RNA pseudouridylate synthase	Chromosome	23.3529	22.8629	23.9384	22.9018	18	18	18	63.5	63.5	63.5	24.103	0	122.04	188320000	195	A0A6N4CTI4	A0A6N4CTI4
A0A6N4CTI8	Small ribosomal subunit biogenesis GTPase RsgA (EC 3.6.1.-)	rsgA ASJ32_05005	OTHER	Cytoplasmic	S	One of several proteins that assist in the late maturation steps of the functional core of the 30S ribosomal subunit. Helps release RbfA from mature subunits. May play a role in the assembly of ribosomal proteins into the subunit. Circularly permuted GTPase that catalyzes slow GTP hydrolysis, GTPase activity is stimulated by the 30S ribosomal subunit	Chromosome	24.9482	24.38	24.7307	25.0812	20	20	20	60.9	60.9	60.9	38.129	0	294.94	1302600000	547	A0A6N4CTI8	A0A6N4CTI8
A0A6N4CTJ1	33 kDa chaperonin (Heat shock protein 33 homolog) (HSP33)	hslO ASJ32_05645	OTHER	Cytoplasmic	O	Redox regulated molecular chaperone. Protects both thermally unfolding and oxidatively damaged proteins from irreversible aggregation. Plays an important role in the bacterial defense system toward oxidative stress	Chromosome	25.2455	25.0436	25.6944	24.3991	17	17	17	68	68	68	33.12	0	323.31	835010000	372	A0A6N4CTJ1	A0A6N4CTJ1
A0A6N4CTJ2	LysR family transcriptional regulator	ASJ32_18010	OTHER	Cytoplasmic	K	transcriptional regulator	Chromosome	21.2308	21.1094	21.935	21.4145	14	14	14	57.8	57.8	57.8	34.322	0	66.389	217670000	148	A0A6N4CTJ2	A0A6N4CTJ2
A0A6N4CTJ4	D-erythrose-4-phosphate dehydrogenase (E4PDH) (EC 1.2.1.72)	gapA epd ASJ32_17585 GO994_03790	OTHER	Cytoplasmic	H	Catalyzes the NAD-dependent conversion of D-erythrose 4- phosphate to 4-phosphoerythronate	Chromosome	24.3353	24.1942	25.6519	25.5874	26	26	26	70.8	70.8	70.8	36.786	0	323.31	1800100000	353	A0A6N4CTJ4	A0A6N4CTJ4
A0A6N4CTJ5	Transcriptional regulator	ASJ32_17285	OTHER	Cytoplasmic	K	hydrogen peroxide-inducible genes	Chromosome	24.8089	24.5385	25.4945	25.4179	16	16	16	54	54	54	33.485	0	251.94	1123400000	364	A0A6N4CTJ5	A0A6N4CTJ5
A0A6N4CTJ6	Erythronate-4-phosphate dehydrogenase (EC 1.1.1.290)	pdxB ASJ32_19445	OTHER	Cytoplasmic	H	Catalyzes the oxidation of erythronate-4-phosphate to 3- hydroxy-2-oxo-4-phosphonooxybutanoate	Chromosome	24.3563	24.6535	24.9193	24.4713	27	27	27	76.4	76.4	76.4	41.462	0	323.31	548270000	417	A0A6N4CTJ6	A0A6N4CTJ6
A0A6N4CTJ7	YtfJ family protein	ASJ32_17565 GO994_03765	SP(Sec/SPI)	Unknown	S	transcriptional regulator	Chromosome	23.9402	24.556	23.8719	23.5924	17	17	17	80	80	80	19.631	0	323.31	380180000	268	A0A6N4CTJ7	A0A6N4CTJ7
A0A6N4CTK2	Site-specific DNA-methyltransferase (adenine-specific) (EC 2.1.1.72)	ASJ32_17335	OTHER	Cytoplasmic	L	D12 class N6 adenine-specific DNA methyltransferase	Chromosome	23.3142	23.5986	24.4317	22.5691	26	26	26	73.8	73.8	73.8	32.845	0	323.31	665320000	437	A0A6N4CTK2	A0A6N4CTK2
A0A6N4CTK4	Maltodextrin-binding protein	malE ASJ32_02365	LIPO(Sec/SPII)	Periplasmic	G	Bacterial extracellular solute-binding protein	Chromosome	25.0141	25.5645	26.0189	25.1951	44	44	44	80.4	80.4	80.4	42.128	0	323.31	3539400000	1659	A0A6N4CTK4	A0A6N4CTK4
A0A6N4CTK6	Phosphoenolpyruvate synthase (PEP synthase) (EC 2.7.9.2) (Pyruvate, water dikinase)	ASJ32_19495	OTHER	Cytoplasmic	H	Catalyzes the phosphorylation of pyruvate to phosphoenolpyruvate	Chromosome	27.5936	27.7008	27.1896	27.151	68	68	68	63	63	63	86.173	0	323.31	11452000000	4176	A0A6N4CTK6	A0A6N4CTK6
A0A6N4CTK7	Aminomethyltransferase	ASJ32_17635	OTHER	Unknown	S	Chain A, Ygfz protein	Chromosome	25.5989	26.0779	24.4723	25.2884	17	17	17	78.9	78.9	78.9	33.16	0	323.31	1376300000	591	A0A6N4CTK7	A0A6N4CTK7
A0A6N4CTL1	Haloacid dehalogenase	ASJ32_17385	OTHER	Cytoplasmic	S	Haloacid dehalogenase-like hydrolase	Chromosome	21.3085	21.7418	21.3145	NaN	8	8	8	57.1	57.1	57.1	21.785	0	121.66	111460000	97	A0A6N4CTL1	A0A6N4CTL1
A0A6N4CTL3	Transcriptional regulator	ASJ32_17665	SP(Sec/SPI)	Periplasmic	T	Sigma-E factor regulatory protein RseB	Chromosome	22.1583	22.377	23.3596	22.85	11	11	11	45.1	45.1	45.1	36.081	0	160.05	266910000	192	A0A6N4CTL3	A0A6N4CTL3
A0A6N4CTL4	Uncharacterized protein	ASJ32_02415	OTHER	Unknown	S	Protein of unknown function, DUF	Chromosome	24.0467	24.2092	NaN	23.9847	15	15	15	93.3	93.3	93.3	12.887	0	323.31	210900000	152	A0A6N4CTL4	A0A6N4CTL4
A0A6N4CTL7	Uncharacterized protein	ASJ32_18760	LIPO(Sec/SPII)	Periplasmic	-	-	Chromosome	22.4882	22.54	24.1553	23.3504	34	34	34	73.4	73.4	73.4	41.558	0	323.31	656920000	794	A0A6N4CTL7	A0A6N4CTL7
A0A6N4CTM0	Recombination-associated protein RdgC	rdgC ASJ32_19170 GO994_16595	OTHER	Cytoplasmic	L	May be involved in recombination	Chromosome	27.7618	28.112	27.6784	28.1622	34	34	27	84.2	84.2	75.9	33.775	0	323.31	7963800000	2043	A0A6N4CTM0	A0A6N4CTM0
A0A6N4CTM1	Ribonuclease 3 (EC 3.1.26.3) (Ribonuclease III) (RNase III)	rnc ASJ32_17685 GO994_03890	OTHER	Cytoplasmic	K	Digests double-stranded RNA. Involved in the processing of primary rRNA transcript to yield the immediate precursors to the large and small rRNAs (23S and 16S). Processes some mRNAs, and tRNAs when they are encoded in the rRNA operon. Processes pre- crRNA and tracrRNA of type II CRISPR loci if present in the organism	Chromosome	24.6439	24.0086	21.9766	25.1047	28	28	28	70.9	70.9	70.9	24.785	0	323.31	2093900000	856	A0A6N4CTM1	A0A6N4CTM1
A0A6N4CTM4	Glycerol kinase (EC 2.7.1.30) (ATP:glycerol 3-phosphotransferase) (Glycerokinase) (GK)	glpK ASJ32_02465 GO994_09685	OTHER	Cytoplasmic	F	Key enzyme in the regulation of glycerol uptake and metabolism. Catalyzes the phosphorylation of glycerol to yield sn- glycerol 3-phosphate	Chromosome	23.2982	23.285	23.4057	22.6949	35	35	35	70.8	70.8	70.8	55.492	0	323.31	424960000	460	A0A6N4CTM4	A0A6N4CTM4
A0A6N4CTM9	HPr family phosphocarrier protein (PTS sugar transporter)	ASJ32_19220 GO994_16545	OTHER	Cytoplasmic	G	phosphocarrier protein	Chromosome	29.1552	28.7339	28.9845	28.2099	24	24	24	100	100	100	9.0943	0	323.31	15497000000	2689	A0A6N4CTM9	A0A6N4CTM9
A0A6N4CTN1	CTP synthase (EC 6.3.4.2) (Cytidine 5'-triphosphate synthase) (Cytidine triphosphate synthetase) (CTP synthetase) (CTPS) (UTP--ammonia ligase)	pyrG ASJ32_17735 GO994_03940	SP(Sec/SPI)	Cytoplasmic	F	Catalyzes the ATP-dependent amination of UTP to CTP with either L-glutamine or ammonia as the source of nitrogen. Regulates intracellular CTP levels through interactions with the four ribonucleotide triphosphates	Chromosome	27.2005	26.3803	26.6652	27.0637	81	81	81	93.4	93.4	93.4	60.036	0	323.31	32952000000	5771	A0A6N4CTN1	A0A6N4CTN1
A0A6N4CTN3	RecBCD enzyme subunit RecB (EC 3.1.11.5) (Exonuclease V subunit RecB) (ExoV subunit RecB) (Helicase/nuclease RecBCD subunit RecB)	recB ASJ32_18865	OTHER	Cytoplasmic	L	A helicase nuclease that prepares dsDNA breaks (DSB) for recombinational DNA repair. Binds to DSBs and unwinds DNA via a highly rapid and processive ATP-dependent bidirectional helicase activity. Unwinds dsDNA until it encounters a Chi (crossover hotspot instigator) sequence from the 3' direction. Cuts ssDNA a few nucleotides 3' to the Chi site. The properties and activities of the enzyme are cha…	Chromosome	22.9962	23.3167	23.607	23.0077	44	44	44	46.4	46.4	46.4	133.54	0	323.31	732230000	393	A0A6N4CTN3	A0A6N4CTN3
A0A6N4CTP0	Quinolinate synthase A (EC 2.5.1.72)	nadA ASJ32_18485	OTHER	Cytoplasmic	H	Catalyzes the condensation of iminoaspartate with dihydroxyacetone phosphate to form quinolinate	Chromosome	28.5006	28.4432	28.1743	29.0207	29	29	29	77.3	77.3	77.3	38.913	0	218.28	5917000000	793	A0A6N4CTP0	A0A6N4CTP0
A0A6N4CTP1	Succinyl-CoA synthetase subunit alpha	ASJ32_04205	LIPO(Sec/SPII)	Unknown	S	Endonuclease/Exonuclease/phosphatase family	Chromosome	23.277	22.964	23.5439	23.6807	30	30	30	64.1	64.1	64.1	49.312	0	323.31	1977300000	1158	A0A6N4CTP1	A0A6N4CTP1
A0A6N4CTP3	Octanoyltransferase (EC 2.3.1.181) (Lipoate-protein ligase B) (Lipoyl/octanoyl transferase) (Octanoyl-[acyl-carrier-protein]-protein N-octanoyltransferase)	lipB ASJ32_16970	OTHER	Cytoplasmic	H	Catalyzes the transfer of endogenously produced octanoic acid from octanoyl-acyl-carrier-protein onto the lipoyl domains of lipoate-dependent enzymes. Lipoyl-ACP can also act as a substrate although octanoyl-ACP is likely to be the physiological substrate	Chromosome	24.0287	23.9781	24.1703	24.205	10	10	10	45.8	45.8	45.8	24.367	0	134.03	942720000	448	A0A6N4CTP3	A0A6N4CTP3
A0A6N4CTP7	Homoserine kinase (HK) (HSK) (EC 2.7.1.39)	thrB ASJ32_19325	OTHER	Unknown	E	Catalyzes the ATP-dependent phosphorylation of L- homoserine to L-homoserine phosphate	Chromosome	24.6585	24.6482	24.4921	24.6459	23	23	23	50.8	50.8	50.8	35.233	0	291.81	1071900000	421	A0A6N4CTP7	A0A6N4CTP7
A0A6N4CTP9	Bifunctional protein PutA [Includes: Proline dehydrogenase (EC 1.5.5.2) (Proline oxidase); Delta-1-pyrroline-5-carboxylate dehydrogenase (P5C dehydrogenase) (EC 1.2.1.88) (L-glutamate gamma-semialdehyde dehydrogenase)]	putA ASJ32_18535 GO994_17865	OTHER	Cytoplasmic	C	Oxidizes proline to glutamate for use as a carbon and nitrogen source	Chromosome	27.1101	24.5358	25.3181	26.1295	72	72	72	72.2	72.2	72.2	114.31	0	323.31	1993900000	826	A0A6N4CTP9	A0A6N4CTP9
A0A6N4CTQ1	Transcription termination/antitermination protein NusA	nusA ASJ32_04265 GO994_05265	OTHER	Cytoplasmic	K	Participates in both transcription termination and antitermination	Chromosome	29.5665	29.8582	29.4909	29.8123	64	64	64	66.8	66.8	66.8	55.369	0	323.31	34848000000	5537	A0A6N4CTQ1	A0A6N4CTQ1
A0A6N4CTQ4	Glycerate dehydrogenase (EC 1.1.1.29)	ASJ32_17115 GO994_05705	OTHER	Cytoplasmic	C	Belongs to the D-isomer specific 2-hydroxyacid dehydrogenase family	Chromosome	23.5243	23.1477	23.5438	22.993	10	10	10	43.7	43.7	43.7	34.791	0	63.982	191120000	122	A0A6N4CTQ4	A0A6N4CTQ4
A0A6N4CTQ7	Deoxyuridine 5'-triphosphate nucleotidohydrolase (dUTPase) (EC 3.6.1.23) (dUTP pyrophosphatase)	dut ASJ32_18955 GO994_00445	OTHER	Unknown	F	This enzyme is involved in nucleotide metabolism it produces dUMP, the immediate precursor of thymidine nucleotides and it decreases the intracellular concentration of dUTP so that uracil cannot be incorporated into DNA	Chromosome	25.8523	25.6778	25.3632	25.6804	10	10	10	78.3	78.3	78.3	16.168	0	298.78	1121800000	455	A0A6N4CTQ7	A0A6N4CTQ7
A0A6N4CTQ8	Pantothenate synthetase (PS) (EC 6.3.2.1) (Pantoate--beta-alanine ligase) (Pantoate-activating enzyme)	panC ASJ32_18590 GO994_17810	OTHER	Cytoplasmic	H	Catalyzes the condensation of pantoate with beta-alanine in an ATP-dependent reaction via a pantoyl-adenylate intermediate	Chromosome	24.6617	24.69	24.6686	23.9257	26	26	26	74.3	74.3	74.3	31.052	0	323.31	1035700000	501	A0A6N4CTQ8	A0A6N4CTQ8
A0A6N4CTR1	Arginine ABC transporter substrate-binding protein	ASJ32_03695	SP(Sec/SPI)	Periplasmic	ET	belongs to the bacterial solute-binding protein 3 family	Chromosome	24.49	25.3017	23.2761	23.1384	20	20	20	80.8	80.8	80.8	27.03	0	323.31	563070000	362	A0A6N4CTR1	A0A6N4CTR1
A0A6N4CTR4	Phosphoglucosamine mutase (EC 5.4.2.10)	glmM ASJ32_04295	OTHER	Cytoplasmic	G	Catalyzes the conversion of glucosamine-6-phosphate to glucosamine-1-phosphate	Chromosome	27.7701	28.186	28.4037	28.1045	55	55	55	85.1	85.1	85.1	47.496	0	323.31	13536000000	3379	A0A6N4CTR4	A0A6N4CTR4
A0A6N4CTR7	Zinc-responsive transcriptional regulator (Zn(2+)-responsive transcriptional regulator)	zntR ASJ32_19725 GO994_04065	OTHER	Cytoplasmic	K	MerR, DNA binding	Chromosome	24.2302	23.768	24.6508	24.1387	20	20	20	100	100	100	16.37	0	230.83	454380000	182	A0A6N4CTR7	A0A6N4CTR7
A0A6N4CTR9	Ribosome maturation factor RimM	rimM ASJ32_03750 GO994_18400	OTHER	Cytoplasmic	J	An accessory protein needed during the final step in the assembly of 30S ribosomal subunit, possibly for assembly of the head region. Probably interacts with S19. Essential for efficient processing of 16S rRNA. May be needed both before and after RbfA during the maturation of 16S rRNA. It has affinity for free ribosomal 30S subunits but not for 70S ribosomes	Chromosome	25.6144	26.4614	26.2335	25.7555	16	16	16	60.7	60.7	60.7	19.337	0	250.88	1516700000	388	A0A6N4CTR9	A0A6N4CTR9
A0A6N4CTS1	Nucleoside triphosphate hydrolase (EC 3.6.1.9)	mazG ASJ32_17730	OTHER	Cytoplasmic	S	Phosphoribosyl-ATP pyrophosphohydrolase	Chromosome	24.9214	25.4256	24.0102	24.315	17	17	17	60.4	60.4	60.4	30.091	0	309.06	1060900000	281	A0A6N4CTS1	A0A6N4CTS1
A0A6N4CTS4	Iron-sulfur cluster insertion protein ErpA	erpA ASJ32_18700 GO994_17700	OTHER	Cytoplasmic	C	Iron-sulfur cluster insertion protein ErpA	Chromosome	26.5691	26.1937	25.52	26.0009	9	9	9	74.1	74.1	74.1	12.3	0	323.31	1522500000	492	A0A6N4CTS4	A0A6N4CTS4
A0A6N4CTS6	Serine hydroxymethyltransferase (SHMT) (Serine methylase) (EC 2.1.2.1)	glyA ASJ32_04435 GO994_05100	OTHER	Cytoplasmic	E	Catalyzes the reversible interconversion of serine and glycine with tetrahydrofolate (THF) serving as the one-carbon carrier. This reaction serves as the major source of one-carbon groups required for the biosynthesis of purines, thymidylate, methionine, and other important biomolecules. Also exhibits THF- independent aldolase activity toward beta-hydroxyamino acids, producing glycine and aldehyd…	Chromosome	29.6641	29.6488	29.5828	29.7035	65	65	65	77.2	77.2	77.2	45.635	0	323.31	72483000000	10477	A0A6N4CTS6	A0A6N4CTS6
A0A6N4CTS7	Uncharacterized protein	ASJ32_03800 GO994_18340	SP(Sec/SPI)	Unknown	-	-	Chromosome	23.2006	24.251	NaN	24.1154	8	8	8	57.5	57.5	57.5	14.612	0	38.774	320570000	124	A0A6N4CTS7	A0A6N4CTS7
A0A6N4CTS9	Porin	ASJ32_19790 GO994_04135	SP(Sec/SPI)	OuterMembrane	M	Belongs to the Gram-negative porin family	Chromosome	25.6532	24.7006	24.3929	25.2507	41	41	41	71.7	71.7	71.7	39.186	0	323.31	459530000000	38783	A0A6N4CTS9	A0A6N4CTS9
A0A6N4CTT9	Two-component system response regulator	ASJ32_02785	OTHER	Cytoplasmic	K	response regulator	Chromosome	23.7037	23.2431	23.0971	NaN	18	18	18	81.6	81.6	81.6	23.533	0	323.31	277550000	173	A0A6N4CTT9	A0A6N4CTT9
A0A6N4CTU0	3,4-dihydroxy-2-butanone 4-phosphate synthase (DHBP synthase) (EC 4.1.99.12)	ribB ASJ32_04405	OTHER	Cytoplasmic	H	Catalyzes the conversion of D-ribulose 5-phosphate to formate and 3,4-dihydroxy-2-butanone 4-phosphate	Chromosome	25.0755	24.3161	24.4223	25.8048	41	41	41	91.3	91.3	91.3	40.032	0	323.31	6255600000	1703	A0A6N4CTU0	A0A6N4CTU0
A0A6N4CTU4	Diguanylate cyclase	ASJ32_03905	OTHER	Cytoplasmic	T	diguanylate cyclase	Chromosome	21.889	20.8956	NaN	21.6926	19	19	19	53.8	53.8	53.8	38.751	0	214.05	281570000	236	A0A6N4CTU4	A0A6N4CTU4
A0A6N4CTU9	Triosephosphate isomerase (TIM) (TPI) (EC 5.3.1.1) (Triose-phosphate isomerase)	tpiA ASJ32_04290	OTHER	Cytoplasmic	G	Involved in the gluconeogenesis. Catalyzes stereospecifically the conversion of dihydroxyacetone phosphate (DHAP) to D-glyceraldehyde-3-phosphate (G3P)	Chromosome	24.1599	24.5366	24.771	23.9139	15	15	15	66.5	66.5	66.5	27.407	0	187.44	850030000	414	A0A6N4CTU9	A0A6N4CTU9
A0A6N4CTV1	Chaperone protein TorD	torD ASJ32_04455 GO994_05090	OTHER	Cytoplasmic	O	Involved in the biogenesis of TorA. Acts on TorA before the insertion of the molybdenum cofactor and, as a result, probably favors a conformation of the apoenzyme that is competent for acquiring the cofactor	Chromosome	22.1443	21.8663	22.4223	20.9822	9	9	9	70.6	70.6	70.6	23.868	0.0004384	28.276	97174000	92	A0A6N4CTV1	A0A6N4CTV1
A0A6N4CTV3	50S ribosomal protein L9	rplI ASJ32_03960 GO994_18180	OTHER	Cytoplasmic	J	binds to the 23S rRNA	Chromosome	31.8219	31.8387	32.0262	32.7774	39	39	39	100	100	100	15.329	0	323.31	115600000000	14403	A0A6N4CTV3	A0A6N4CTV3
A0A6N4CTV7	Cold-shock protein (Ribosome-associated translation inhibitor RaiA)	raiA ASJ32_02895 GO994_09220	OTHER	Cytoplasmic	J	ribosomal subunit interface protein	Chromosome	24.2117	24.0015	22.895	23.6134	12	12	12	83	83	83	12.678	0	123.54	1950400000	627	A0A6N4CTV7	A0A6N4CTV7
A0A6N4CTV8	Pitrilysin (EC 3.4.24.55) (Protease 3) (Protease III) (Protease pi)	ASJ32_16925	OTHER	Unknown	O	Belongs to the peptidase M16 family	Chromosome	21.9175	22.0856	21.838	22.1658	49	49	49	49.2	49.2	49.2	105.21	0	294.74	571650000	406	A0A6N4CTV8	A0A6N4CTV8
A0A6N4CTV9	Glucose-1-phosphate adenylyltransferase (EC 2.7.7.27) (ADP-glucose pyrophosphorylase) (ADPGlc PPase) (ADP-glucose synthase)	glgC ASJ32_19610	OTHER	Cytoplasmic	H	Catalyzes the synthesis of ADP-glucose, a sugar donor used in elongation reactions on alpha-glucans	Chromosome	25.3262	25.8331	26.0128	25.0681	37	37	24	67.6	67.6	47.5	47.066	0	323.31	2789300000	1142	A0A6N4CTV9	A0A6N4CTV9
A0A6N4CTW3	Long-chain fatty acid--CoA ligase	ASJ32_04010	OTHER	Cytoplasmic	I	AMP-binding enzyme	Chromosome	21.5844	NaN	22.4457	22.4765	49	49	49	83.2	83.2	83.2	67.179	0	323.31	4050900000	1476	A0A6N4CTW3	A0A6N4CTW3
A0A6N4CTW6	BolA/IbaG family iron-sulfur metabolism protein (Cell division protein BolA)	ASJ32_16310 GO994_01890	OTHER	Unknown	K	Belongs to the BolA IbaG family	Chromosome	21.7972	21.9919	21.9019	NaN	7	7	7	43.5	43.5	43.5	9.4839	0.00043725	27.816	37587000	35	A0A6N4CTW6	A0A6N4CTW6
A0A6N4CTX0	6,7-dimethyl-8-ribityllumazine synthase (DMRL synthase) (LS) (Lumazine synthase) (EC 2.5.1.78)	ribH ASJ32_04400	OTHER	Cytoplasmic	H	Catalyzes the formation of 6,7-dimethyl-8- ribityllumazine by condensation of 5-amino-6-(D- ribitylamino)uracil with 3,4-dihydroxy-2-butanone 4-phosphate. This is the penultimate step in the biosynthesis of riboflavin	Chromosome	28.3106	28.4276	28.4924	28.209	24	24	24	100	100	100	16.568	0	323.31	53710000000	6839	A0A6N4CTX0	A0A6N4CTX0
A0A6N4CTX6	Lipopolysaccharide export system ATP-binding protein LptB	lptB ASJ32_16360 GO994_01940	OTHER	Cytoplasmic	S	Branched-chain amino acid ATP-binding cassette transporter	Chromosome	22.9387	21.1745	22.0987	23.2446	28	28	28	64.7	64.7	64.7	26.666	0	323.31	3500600000	1029	A0A6N4CTX6	A0A6N4CTX6
A0A6N4CTX8	Alpha/beta fold hydrolase (Esterase)	ASJ32_03000 GO994_09115	OTHER	Unknown	S	Serine aminopeptidase, S33	Chromosome	21.7528	22.4839	22.7618	21.8147	12	12	12	51.6	51.6	51.6	27.708	0	187.17	188220000	191	A0A6N4CTX8	A0A6N4CTX8
A0A6N4CTY9	Biotin carboxylase (EC 6.3.4.14) (EC 6.4.1.2)	accC ASJ32_04500 GO994_05045	OTHER	Cytoplasmic	I	Biotin carboxylase	Chromosome	27.3748	26.9096	27.4403	27.3985	62	62	62	80.3	80.3	80.3	48.989	0	323.31	28947000000	6525	A0A6N4CTY9	A0A6N4CTY9
A0A6N4CTZ0	Elongation factor P (EF-P)	efp ASJ32_17125 GO994_05715	OTHER	Cytoplasmic	J	Involved in peptide bond synthesis. Stimulates efficient translation and peptide-bond synthesis on native or reconstituted 70S ribosomes in vitro. Probably functions indirectly by altering the affinity of the ribosome for aminoacyl-tRNA, thus increasing their reactivity as acceptors for peptidyl transferase	Chromosome	28.0142	28.2292	27.3262	26.9508	25	25	25	67.6	67.6	67.6	21.065	0	323.31	15643000000	2950	A0A6N4CTZ0	A0A6N4CTZ0
A0A6N4CTZ2	23S rRNA methyltransferase (TrmH family RNA methyltransferase)	ASJ32_04815 GO994_04695	OTHER	Unknown	J	rRNA methylase (SpoU class)	Chromosome	22.1934	NaN	20.859	22.7733	4	4	4	47.3	47.3	47.3	18.375	0	82.693	96268000	133	A0A6N4CTZ2	A0A6N4CTZ2
A0A6N4CTZ3	N-acetylglucosamine-6-phosphate deacetylase (EC 3.5.1.25)	nagA ASJ32_03050	OTHER	Cytoplasmic	G	Belongs to the metallo-dependent hydrolases superfamily. NagA family	Chromosome	23.1874	23.6077	24.4086	23.1718	23	23	23	67.5	67.5	67.5	40.954	0	323.31	882240000	365	A0A6N4CTZ3	A0A6N4CTZ3
A0A6N4CTZ7	TetR family transcriptional regulator	ASJ32_13715 GO994_21480	OTHER	Cytoplasmic	K	Transcriptional regulator	Chromosome	23.9621	22.7693	NaN	24.005	12	12	12	56.1	56.1	56.1	24.865	0	278.37	718330000	256	A0A6N4CTZ7	A0A6N4CTZ7
A0A6N4CTZ8	Asparagine--tRNA ligase (EC 6.1.1.22) (Asparaginyl-tRNA synthetase) (AsnRS)	asnS ASJ32_18030	OTHER	Cytoplasmic	J	tRNA synthetases class II (D, K and N)	Chromosome	27.0028	26.7262	26.4412	26.2129	56	56	56	80.9	80.9	80.9	52.235	0	323.31	10813000000	2608	A0A6N4CTZ8	A0A6N4CTZ8
A0A6N4CU00	30S ribosomal protein S9	rpsI ASJ32_16465 GO994_02045	OTHER	Cytoplasmic	J	Belongs to the universal ribosomal protein uS9 family	Chromosome	30.3851	30.5718	30.103	31.8407	25	25	25	93.1	93.1	93.1	14.769	0	323.31	97798000000	8999	A0A6N4CU00	A0A6N4CU00
A0A6N4CU09	Lysine--tRNA ligase (EC 6.1.1.6) (Lysyl-tRNA synthetase) (LysRS)	lysS ASJ32_04620	OTHER	Cytoplasmic	J	Belongs to the class-II aminoacyl-tRNA synthetase family	Chromosome	28.4734	28.0431	27.1869	28.2153	73	73	73	83.4	83.4	83.4	58.256	0	323.31	39268000000	7718	A0A6N4CU09	A0A6N4CU09
A0A6N4CU12	Two-component system response regulator (Two-component system response regulator ArcA)	arcA ASJ32_19285 GO994_16480	OTHER	Cytoplasmic	T	Transcriptional regulatory protein, C terminal	Chromosome	26.0247	25.4382	25.0984	26.4319	28	28	28	78.7	78.7	78.7	27.195	0	323.31	5702100000	1450	A0A6N4CU12	A0A6N4CU12
A0A6N4CU19	NrdJb	ASJ32_00020 GO994_17665	OTHER	Cytoplasmic	F	COG0209 Ribonucleotide reductase, alpha subunit	Chromosome	22.3798	21.913	22.7972	23.5304	14	14	14	61.2	61.2	61.2	25.556	0	323.31	532480000	465	A0A6N4CU19	A0A6N4CU19
A0A6N4CU30	Aromatic amino acid lyase (Histidine ammonia-lyase)	ASJ32_04730 GO994_04790	OTHER	Cytoplasmic	E	Aromatic amino acid lyase	Chromosome	22.0775	22.1931	22.6952	21.5485	26	26	25	51	51	51	56.478	0	238.68	303900000	180	A0A6N4CU30	A0A6N4CU30
A0A6N4CU34	L-aspartate oxidase (EC 1.4.3.16)	nadB ASJ32_17650 GO994_03855	OTHER	Unknown	H	Catalyzes the oxidation of L-aspartate to iminoaspartate	Chromosome	26.1554	26.4832	25.8914	25.1384	40	40	40	69.3	69.3	69.3	59.572	0	323.31	6546900000	2331	A0A6N4CU34	A0A6N4CU34
A0A6N4CU42	Pyridoxine 5'-phosphate synthase (PNP synthase) (EC 2.6.99.2)	pdxJ ASJ32_17700	OTHER	Cytoplasmic	H	Catalyzes the complicated ring closure reaction between the two acyclic compounds 1-deoxy-D-xylulose-5-phosphate (DXP) and 3-amino-2-oxopropyl phosphate (1-amino-acetone-3-phosphate or AAP) to form pyridoxine 5'-phosphate (PNP) and inorganic phosphate	Chromosome	26.5188	26.76	26.0963	26.7873	30	30	30	99.6	99.6	99.6	26.567	0	323.31	10073000000	2981	A0A6N4CU42	A0A6N4CU42
A0A6N4CU43	Peptidylprolyl isomerase	ASJ32_16835	OTHER	CytoplasmicMembrane	O	Peptidylprolyl isomerase	Chromosome	24.3782	24.2185	25.4549	25.6831	122	122	122	94.7	94.7	94.7	70.329	0	323.31	57539000000	16007	A0A6N4CU43	A0A6N4CU43
A0A6N4CU48	Prolyl endopeptidase (Prolyl oligopeptidase family serine peptidase)	ASJ32_18420 GO994_03275	LIPO(Sec/SPII)	Periplasmic	E	Prolyl oligopeptidase, N-terminal beta-propeller domain	Chromosome	23.8953	24.1449	23.9863	23.9138	55	55	55	73.7	73.7	73.7	79.139	0	323.31	3057000000	1698	A0A6N4CU48	A0A6N4CU48
A0A6N4CU51	2-C-methyl-D-erythritol 2,4-cyclodiphosphate synthase (MECDP-synthase) (MECPP-synthase) (MECPS) (EC 4.6.1.12)	ispF ASJ32_17755 GO994_03960	OTHER	Cytoplasmic	I	Involved in the biosynthesis of isopentenyl diphosphate (IPP) and dimethylallyl diphosphate (DMAPP), two major building blocks of isoprenoid compounds. Catalyzes the conversion of 4- diphosphocytidyl-2-C-methyl-D-erythritol 2-phosphate (CDP-ME2P) to 2-C-methyl-D-erythritol 2,4-cyclodiphosphate (ME-CPP) with a corresponding release of cytidine 5-monophosphate (CMP)	Chromosome	22.4688	22.2939	23.0044	NaN	9	9	9	66.5	66.5	66.5	16.562	0	58.41	117300000	80	A0A6N4CU51	A0A6N4CU51
A0A6N4CU55	Adenine DNA glycosylase (EC 3.2.2.31)	mutY ASJ32_15980 GO994_19595	OTHER	Cytoplasmic	L	FES	Chromosome	23.7368	23.9849	24.2636	24.219	21	21	21	75.6	75.6	75.6	39.79	0	323.31	527250000	370	A0A6N4CU55	A0A6N4CU55
A0A6N4CU59	Peptide ABC transporter substrate-binding protein	ASJ32_04880	SP(Sec/SPI)	Periplasmic	E	Bacterial extracellular solute-binding proteins, family 5 Middle	Chromosome	24.8779	24.6568	24.6872	23.8428	34	34	34	59.3	59.3	59.3	68.819	0	241.88	622420000	435	A0A6N4CU59	A0A6N4CU59
A0A6N4CU61	RNA polymerase sigma factor RpoD (Sigma-70)	rpoD ASJ32_17805	OTHER	Cytoplasmic	K	Sigma factors are initiation factors that promote the attachment of RNA polymerase to specific initiation sites and are then released. This sigma factor is the primary sigma factor during exponential growth	Chromosome	26.6808	25.7916	26.4807	27.2484	70	70	69	62.2	62.2	60.6	69.915	0	323.31	19845000000	4341	A0A6N4CU61	A0A6N4CU61
A0A6N4CU63	Octaprenyl diphosphate synthase	ASJ32_00290	OTHER	Cytoplasmic	H	Belongs to the FPP GGPP synthase family	Chromosome	24.3903	24.0228	24.06	24.7367	20	20	20	67.8	67.8	67.8	35.722	0	323.31	1037400000	501	A0A6N4CU63	A0A6N4CU63
A0A6N4CU75	RNA-binding protein (Ribosome assembly RNA-binding protein YhbY)	yhbY ASJ32_04315 GO994_05215	OTHER	Cytoplasmic	J	CRS1_YhbY	Chromosome	25.7689	26.0714	26.9617	25.33	15	15	15	100	100	100	10.996	0	254.32	1420500000	424	A0A6N4CU75	A0A6N4CU75
A0A6N4CU79	Phospholipid-binding protein MlaC (Toluene tolerance protein)	mlaC ASJ32_16320 GO994_01900	SP(Sec/SPI)	Unknown	Q	Toluene tolerance protein	Chromosome	23.8396	23.8036	24.5098	22.8472	19	19	19	61	61	61	23.159	0	300.72	417360000	267	A0A6N4CU79	A0A6N4CU79
A0A6N4CU88	Alpha/beta hydrolase	ASJ32_05085	OTHER	Cytoplasmic	S	hydrolases or acyltransferases (alpha beta hydrolase superfamily)	Chromosome	24.3188	24.6882	24.8232	23.8989	24	24	24	45.9	45.9	45.9	48.228	0	300.95	1207200000	649	A0A6N4CU88	A0A6N4CU88
A0A6N4CU90	Lipoyl synthase (EC 2.8.1.8) (Lip-syn) (LS) (Lipoate synthase) (Lipoic acid synthase) (Sulfur insertion protein LipA)	lipA ASJ32_16965	OTHER	Cytoplasmic	H	Catalyzes the radical-mediated insertion of two sulfur atoms into the C-6 and C-8 positions of the octanoyl moiety bound to the lipoyl domains of lipoate-dependent enzymes, thereby converting the octanoylated domains into lipoylated derivatives	Chromosome	24.9835	23.9894	22.2196	23.8056	40	40	39	77.9	77.9	77.6	37.039	0	323.31	3459400000	1441	A0A6N4CU90	A0A6N4CU90
A0A6N4CU91	Azurin	azu ASJ32_13515 GO994_16085	SP(Sec/SPI)	Periplasmic	C	Transfers electrons from cytochrome c551 to cytochrome oxidase	Chromosome	22.6569	21.8745	22.4101	NaN	11	11	11	73.3	73.3	73.3	15.482	0	121.14	140560000	165	A0A6N4CU91	A0A6N4CU91
A0A6N4CU92	Arylsulfatase	ASJ32_18530	SP(Sec/SPI)	Unknown	T	Bacterial SH3 domain homologues	Chromosome	19.753	NaN	20.7095	21.1532	30	30	30	74.6	74.6	74.6	22.626	0	323.31	3936000000	1518	A0A6N4CU92	A0A6N4CU92
A0A6N4CUA0	Antibiotic biosynthesis monooxygenase	ASJ32_18585	OTHER	Unknown	S	Antibiotic biosynthesis monooxygenase	Chromosome	25.5492	25.4562	24.2993	24.4475	14	14	14	70.9	70.9	70.9	13.467	0	323.31	826600000	364	A0A6N4CUA0	A0A6N4CUA0
A0A6N4CUA9	Peptidase M23	ASJ32_17250	SP(Sec/SPI)	CytoplasmicMembrane	M	peptidase	Chromosome	22.1179	22.3966	21.2923	NaN	15	15	15	82.1	82.1	82.1	29.784	0	55.549	117030000	100	A0A6N4CUA9	A0A6N4CUA9
A0A6N4CUB2	Isocitrate dehydrogenase [NADP] (EC 1.1.1.42)	ASJ32_13635 GO994_15135	OTHER	Unknown	C	Isocitrate/isopropylmalate dehydrogenase	Chromosome	29.1555	29.3548	29.2178	28.5307	59	59	59	84.4	84.4	84.4	45.632	0	323.31	27465000000	5789	A0A6N4CUB2	A0A6N4CUB2
A0A6N4CUB5	2-octaprenyl-3-methyl-6-methoxy-1,4-benzoquinol hydroxylase (NAD(P)-binding protein)	ubiF yleB ASJ32_17070 GO994_05660	OTHER	Unknown	CH	FAD binding domain	Chromosome	23.2866	23.1578	24.2534	23.0913	24	24	24	63.6	63.6	63.6	42.764	0	323.31	508490000	395	A0A6N4CUB5	A0A6N4CUB5
A0A6N4CUB6	Uncharacterized protein	ASJ32_05025 GO994_04445	LIPO(Sec/SPII)	Unknown	O	Heat shock protein	Chromosome	25.0661	25.1513	25.8503	26.3032	11	11	11	99.2	99.2	99.2	14.454	0	323.31	2624800000	713	A0A6N4CUB6	A0A6N4CUB6
A0A6N4CUC3	Glyceraldehyde-3-phosphate dehydrogenase (EC 1.2.1.-)	ASJ32_04590	OTHER	Cytoplasmic	G	Belongs to the glyceraldehyde-3-phosphate dehydrogenase family	Chromosome	23.541	23.5914	24.5215	24.1857	31	31	31	67.3	67.3	67.3	52.303	0	323.31	779540000	760	A0A6N4CUC3	A0A6N4CUC3
A0A6N4CUC4	Phosphoglycerate kinase (EC 2.7.2.3)	pgk ASJ32_17590 GO994_03795	OTHER	Cytoplasmic	F	Belongs to the phosphoglycerate kinase family	Chromosome	28.5187	28.8038	28.0424	28.103	56	56	56	99	99	99	40.464	0	323.31	40933000000	10194	A0A6N4CUC4	A0A6N4CUC4
A0A6N4CUC7	Acetate kinase (EC 2.7.2.1) (Acetokinase)	ackA ASJ32_18215 GO994_03515	OTHER	Cytoplasmic	H	Catalyzes the formation of acetyl phosphate from acetate and ATP. Can also catalyze the reverse reaction	Chromosome	24.0223	23.6378	24.0446	24.155	30	29	29	86.5	84.2	84.2	42.553	0	323.31	1366900000	821	A0A6N4CUC7	A0A6N4CUC7
A0A6N4CUD1	Phosphopentomutase (EC 5.4.2.7) (Phosphodeoxyribomutase)	deoB ASJ32_15660	SP(Sec/SPI)	Cytoplasmic	G	Phosphotransfer between the C1 and C5 carbon atoms of pentose	Chromosome	25.5626	26.1775	25.9936	25.5491	25	25	25	64.2	64.2	64.2	43.61	0	217.31	2001800000	617	A0A6N4CUD1	A0A6N4CUD1
A0A6N4CUD6	ABC transporter (ATP-binding cassette domain-containing protein)	ASJ32_05145 GO994_04330	OTHER	CytoplasmicMembrane	Q	ATPases associated with a variety of cellular activities	Chromosome	22.4881	23.1948	23.3873	23.0335	13	13	12	45.7	45.7	45.7	25.115	0	144.31	799820000	331	A0A6N4CUD6	A0A6N4CUD6
A0A6N4CUE2	tRNA-dihydrouridine(20/20a) synthase (EC 1.3.1.91) (U20-specific dihydrouridine synthase) (U20-specific Dus) (tRNA-dihydrouridine synthase A)	dusA ASJ32_15715	OTHER	Cytoplasmic	J	Catalyzes the synthesis of 5,6-dihydrouridine (D), a modified base found in the D-loop of most tRNAs, via the reduction of the C5-C6 double bond in target uridines. Specifically modifies U20 and U20a in tRNAs	Chromosome	23.5002	24.4964	22.8142	22.5214	32	32	32	89	89	89	37.026	0	323.31	1114400000	676	A0A6N4CUE2	A0A6N4CUE2
A0A6N4CUE8	GTPase Era	era ASJ32_17690 GO994_03895	OTHER	CytoplasmicMembrane	S	An essential GTPase that binds both GDP and GTP, with rapid nucleotide exchange. Plays a role in 16S rRNA processing and 30S ribosomal subunit biogenesis and possibly also in cell cycle regulation and energy metabolism	Chromosome	23.5623	22.58	20.0381	22.6718	30	30	30	86	86	86	34.156	0	323.31	1297000000	737	A0A6N4CUE8	A0A6N4CUE8
A0A6N4CUF0	Bifunctional protein HldE [Includes: D-beta-D-heptose 7-phosphate kinase (EC 2.7.1.167) (D-beta-D-heptose 7-phosphotransferase) (D-glycero-beta-D-manno-heptose-7-phosphate kinase); D-beta-D-heptose 1-phosphate adenylyltransferase (EC 2.7.7.70) (D-glycero-beta-D-manno-heptose 1-phosphate adenylyltransferase)]	hldE ASJ32_15935	OTHER	Cytoplasmic	H	Catalyzes the ADP transfer from ATP to D-glycero-beta-D- manno-heptose 1-phosphate, yielding ADP-D-glycero-beta-D-manno- heptose	Chromosome	26.5095	26.0074	26.5337	26.5999	55	55	55	76.4	76.4	76.4	50.481	0	323.31	8849300000	2331	A0A6N4CUF0	A0A6N4CUF0
A0A6N4CUF1	Pyridoxal phosphate homeostasis protein (PLP homeostasis protein)	ASJ32_15765 GO994_18670	OTHER	Cytoplasmic	E	Pyridoxal 5'-phosphate (PLP)-binding protein, which is involved in PLP homeostasis	Chromosome	22.5645	23.0481	22.6491	NaN	25	25	25	76.4	76.4	76.4	25.99	0	205.44	227280000	245	A0A6N4CUF1	A0A6N4CUF1
A0A6N4CUF7	Enolase (EC 4.2.1.11) (2-phospho-D-glycerate hydro-lyase) (2-phosphoglycerate dehydratase)	eno ASJ32_17740 GO994_03945	OTHER	Cytoplasmic	F	Catalyzes the reversible conversion of 2- phosphoglycerate into phosphoenolpyruvate. It is essential for the degradation of carbohydrates via glycolysis	Chromosome	29.6696	29.7186	28.6815	29.3778	74	74	74	88	88	88	45.736	0	323.31	96301000000	18634	A0A6N4CUF7	A0A6N4CUF7
A0A6N4CUG1	Serine-type D-Ala-D-Ala carboxypeptidase (EC 3.4.16.4)	ASJ32_16980	SP(Sec/SPI)	CytoplasmicMembrane	M	Belongs to the peptidase S11 family	Chromosome	25.1524	24.8797	24.4499	25.717	46	46	46	76.8	76.8	76.8	43.367	0	323.31	15424000000	4149	A0A6N4CUG1	A0A6N4CUG1
A0A6N4CUG2	Integration host factor subunit alpha (IHF-alpha)	ihfA himA ASJ32_13155 GO994_10540	OTHER	Cytoplasmic	K	This protein is one of the two subunits of integration host factor, a specific DNA-binding protein that functions in genetic recombination as well as in transcriptional and translational control	Chromosome	27.0653	27.2017	27.5454	28.105	16	16	16	89.8	89.8	89.8	11.199	0	323.31	4932600000	676	A0A6N4CUG2	A0A6N4CUG2
A0A6N4CUG7	LysR family transcriptional regulator	ASJ32_15870	OTHER	Cytoplasmic	K	LysR substrate binding domain	Chromosome	23.4107	22.9218	23.733	23.0549	22	22	22	69.2	69.2	69.2	31.544	0	323.31	411860000	385	A0A6N4CUG7	A0A6N4CUG7
A0A6N4CUG9	Glutamyl-tRNA amidotransferase	ASJ32_17795	OTHER	Cytoplasmic	S	Yqey-like protein	Chromosome	27.1585	27.3259	27.026	26.6794	13	13	13	59.2	59.2	59.2	16.186	0	296.92	2346500000	358	A0A6N4CUG9	A0A6N4CUG9
A0A6N4CUH2	Leucine--tRNA ligase (EC 6.1.1.4) (Leucyl-tRNA synthetase) (LeuRS)	leuS ASJ32_17035 GO994_05625	OTHER	Cytoplasmic	J	Belongs to the class-I aminoacyl-tRNA synthetase family	Chromosome	27.9478	28.3853	28.1933	27.6892	92	92	92	71.8	71.8	71.8	96.438	0	323.31	12338000000	4324	A0A6N4CUH2	A0A6N4CUH2
A0A6N4CUH3	Ubiquinone biosynthesis O-methyltransferase (2-polyprenyl-6-hydroxyphenol methylase) (EC 2.1.1.222) (3-demethylubiquinone 3-O-methyltransferase) (EC 2.1.1.64)	ubiG ASJ32_13205	OTHER	Cytoplasmic	H	O-methyltransferase that catalyzes the 2 O-methylation steps in the ubiquinone biosynthetic pathway	Chromosome	23.2814	22.6995	23.9996	24.0776	22	22	22	69.7	69.7	69.7	26.462	0	323.31	1448500000	799	A0A6N4CUH3	A0A6N4CUH3
A0A6N4CUH4	TonB-dependent receptor	ASJ32_04900	SP(Sec/SPI)	OuterMembrane	P	Receptor	Chromosome	21.3745	22.5525	NaN	21.6787	68	68	68	72.4	72.4	72.4	93.572	0	323.31	4402300000	2361	A0A6N4CUH4	A0A6N4CUH4
A0A6N4CUH7	ABC transporter ATP-binding protein (ABC-F family ATPase)	ASJ32_16830 GO994_08700	OTHER	Cytoplasmic	S	ABC transporter	Chromosome	27.2309	27.1099	28.0797	27.5014	61	61	61	80	80	80	59.184	0	323.31	15591000000	3449	A0A6N4CUH7	A0A6N4CUH7
A0A6N4CUH9	Polyribonucleotide nucleotidyltransferase (EC 2.7.7.8) (Polynucleotide phosphorylase) (PNPase)	pnp ASJ32_04240	OTHER	Cytoplasmic	J	Involved in mRNA degradation. Catalyzes the phosphorolysis of single-stranded polyribonucleotides processively in the 3'- to 5'-direction	Chromosome	30.5669	30.8593	30.8129	30.3352	100	100	100	75.5	75.5	75.5	76.442	0	323.31	123450000000	22289	A0A6N4CUH9	A0A6N4CUH9
A0A6N4CUI6	Delta-aminolevulinic acid dehydratase (EC 4.2.1.24)	hemB ASJ32_15275 GO994_21895	OTHER	Cytoplasmic	H	Belongs to the ALAD family	Chromosome	25.4642	25.9262	26.7123	26.2109	23	23	23	66.7	66.7	66.7	37.054	0	323.31	1481200000	810	A0A6N4CUI6	A0A6N4CUI6
A0A6N4CUJ3	Uncharacterized protein	ASJ32_01060 GO994_06570	SP(Sec/SPI)	OuterMembrane	M	Nucleoside-specific channel-forming protein, Tsx	Chromosome	21.946	21.5135	22.7286	22.5753	11	11	11	44	44	44	31.115	0	323.31	14926000000	2114	A0A6N4CUJ3	A0A6N4CUJ3
A0A6N4CUJ4	GMP reductase (EC 1.7.1.7) (Guanosine 5'-monophosphate oxidoreductase) (Guanosine monophosphate reductase)	guaC ASJ32_17135	OTHER	Cytoplasmic	F	Catalyzes the irreversible NADPH-dependent deamination of GMP to IMP. It functions in the conversion of nucleobase, nucleoside and nucleotide derivatives of G to A nucleotides, and in maintaining the intracellular balance of A and G nucleotides	Chromosome	27.0603	27.5418	27.9726	27.1746	33	33	33	85.6	85.6	85.6	37.481	0	323.31	6556800000	1636	A0A6N4CUJ4	A0A6N4CUJ4
A0A6N4CUJ7	Uncharacterized protein	ASJ32_15325 GO994_21845	SP(Sec/SPI)	CytoplasmicMembrane	-	-	Chromosome	24.5377	24.4032	24.8243	25.104	22	22	22	77.3	77.3	77.3	37.294	0	323.31	1571800000	721	A0A6N4CUJ7	A0A6N4CUJ7
A0A6N4CUJ8	Regulator of ribonuclease activity B	rraB ASJ32_05040	OTHER	Cytoplasmic	S	Globally modulates RNA abundance by binding to RNase E (Rne) and regulating its endonucleolytic activity. Can modulate Rne action in a substrate-dependent manner by altering the composition of the degradosome	Chromosome	22.338	21.0655	NaN	20.7412	4	4	4	36.9	36.9	36.9	12.717	0	128.67	28838000	44	A0A6N4CUJ8	A0A6N4CUJ8
A0A6N4CUJ9	Endolytic peptidoglycan transglycosylase RlpA (EC 4.2.2.-)	rlpA ASJ32_16985	LIPO(Sec/SPII)	Unknown	M	Lytic transglycosylase with a strong preference for naked glycan strands that lack stem peptides	Chromosome	21.1912	21.2988	22.0387	22.4808	30	30	30	74.4	74.4	74.4	33.815	0	323.31	2680500000	1401	A0A6N4CUJ9	A0A6N4CUJ9
A0A6N4CUK0	1-deoxy-D-xylulose-5-phosphate synthase (EC 2.2.1.7) (1-deoxyxylulose-5-phosphate synthase) (DXP synthase) (DXPS)	dxs ASJ32_04360	OTHER	Cytoplasmic	H	Catalyzes the acyloin condensation reaction between C atoms 2 and 3 of pyruvate and glyceraldehyde 3-phosphate to yield 1-deoxy-D-xylulose-5-phosphate (DXP)	Chromosome	22.9197	22.0244	21.2661	23.3656	31	31	31	53.5	53.5	53.5	67.486	0	323.31	1927600000	779	A0A6N4CUK0	A0A6N4CUK0
A0A6N4CUK3	Na(+)-translocating NADH-quinone reductase subunit C (Na(+)-NQR subunit C) (Na(+)-translocating NQR subunit C) (EC 7.2.1.1) (NQR complex subunit C) (NQR-1 subunit C)	nqrC ASJ32_01110	OTHER	Unknown	C	NQR complex catalyzes the reduction of ubiquinone-1 to ubiquinol by two successive reactions, coupled with the transport of Na( ) ions from the cytoplasm to the periplasm. NqrA to NqrE are probably involved in the second step, the conversion of ubisemiquinone to ubiquinol	Chromosome	23.3457	22.5058	24.3006	24.4571	25	25	25	59.2	59.2	59.2	27.925	0	323.31	15078000000	3823	A0A6N4CUK3	A0A6N4CUK3
A0A6N4CUK5	Glutaminase (EC 3.5.1.2)	glsA ASJ32_05105	OTHER	Cytoplasmic	E	Belongs to the glutaminase family	Chromosome	22.3501	21.981	22.9444	22.4901	21	21	21	70.3	70.3	70.3	32.824	0	323.31	542540000	416	A0A6N4CUK5	A0A6N4CUK5
A0A6N4CUL0	Riboflavin synthase subunit alpha	ASJ32_04410	OTHER	Cytoplasmic	H	riboflavin synthase, alpha	Chromosome	24.6897	25.0123	25.3489	24.6444	25	25	25	95.4	95.4	95.4	23.017	0	323.31	3866600000	1720	A0A6N4CUL0	A0A6N4CUL0
A0A6N4CUL2	t(6)A37 threonylcarbamoyladenosine biosynthesis protein TsaB (tRNA threonylcarbamoyladenosine biosynthesis protein TsaB)	ASJ32_12595	OTHER	Extracellular	O	Glycoprotease family	Chromosome	23.6476	23.0106	23.5395	23.1297	12	12	12	47.3	47.3	47.3	25.218	0	214.85	522950000	366	A0A6N4CUL2	A0A6N4CUL2
A0A6N4CUL4	RTX toxin	ASJ32_05160	OTHER	Extracellular	Q	Haemolysin-type calcium-binding repeat (2 copies)	Chromosome	26.4633	26.7801	26.5828	25.7387	117	117	116	64.8	64.8	64.8	219.99	0	323.31	14108000000	11037	A0A6N4CUL4	A0A6N4CUL4
A0A6N4CUL5	Alpha/beta fold hydrolase (Alpha/beta hydrolase)	ASJ32_01160 GO994_06670	OTHER	Cytoplasmic	S	Alpha/beta hydrolase family	Chromosome	22.5962	22.283	22.6417	21.966	9	9	9	37.3	37.3	37.3	23.55	0	66.747	107010000	74	A0A6N4CUL5	A0A6N4CUL5
A0A6N4CUL7	RNA polymerase sigma-54 factor	ASJ32_16365	OTHER	Cytoplasmic	K	Sigma factors are initiation factors that promote the attachment of RNA polymerase to specific initiation sites and are then released	Chromosome	23.6401	23.1007	23.3799	24.0488	24	24	24	47.8	47.8	47.8	53.962	0	323.31	1126900000	569	A0A6N4CUL7	A0A6N4CUL7
A0A6N4CUM0	RNA methyltransferase	ASJ32_15620	OTHER	Cytoplasmic	J	Belongs to the class I-like SAM-binding methyltransferase superfamily. RNA M5U methyltransferase family	Chromosome	26.9301	26.772	26.8229	26.8788	34	34	34	76	76	76	49.467	0	323.31	5453400000	1649	A0A6N4CUM0	A0A6N4CUM0
A0A6N4CUM3	DUF3299 domain-containing protein	ASJ32_17545 GO994_03740	SP(Sec/SPI)	Unknown	S	Protein of unknown function (DUF3299)	Chromosome	23.6055	24.1444	22.287	22.5122	11	11	11	47.8	47.8	47.8	17.342	0	175.38	328950000	305	A0A6N4CUM3	A0A6N4CUM3
A0A6N4CUM4	Nucleoid-associated protein ASJ32_12650	ASJ32_12650 GO994_11800	OTHER	Cytoplasmic	L	Binds to DNA and alters its conformation. May be involved in regulation of gene expression, nucleoid organization and DNA protection	Chromosome	26.9237	26.3349	26.822	26.9095	16	16	16	93.6	93.6	93.6	12.004	0	323.31	1713700000	652	A0A6N4CUM4	A0A6N4CUM4
A0A6N4CUN1	ATP-dependent Zn protease (ATP-dependent zinc protease)	ASJ32_17140 GO994_05730	SP(Sec/SPI)	Unknown	O	Putative ATP-dependant zinc protease	Chromosome	24.1879	24.1296	24.1234	23.3464	10	10	10	65.9	65.9	65.9	18.52	0	110.61	405270000	263	A0A6N4CUN1	A0A6N4CUN1
A0A6N4CUN2	3-ketoacyl-CoA thiolase (EC 2.3.1.16) (Acetyl-CoA acyltransferase) (Beta-ketothiolase) (Fatty acid oxidation complex subunit beta)	fadA ASJ32_15525 GO994_21590	OTHER	Cytoplasmic	I	Catalyzes the final step of fatty acid oxidation in which acetyl-CoA is released and the CoA ester of a fatty acid two carbons shorter is formed	Chromosome	24.7618	24.4959	25.3499	26.1585	24	24	24	58.4	58.4	58.4	40.976	0	323.31	3070600000	1029	A0A6N4CUN2	A0A6N4CUN2
A0A6N4CUN3	Fructose-bisphosphate aldolase (FBP aldolase) (EC 4.1.2.13)	ASJ32_17595	OTHER	Cytoplasmic	G	aldolase	Chromosome	28.6274	29.087	28.2788	27.9755	36	36	36	76.9	76.9	76.9	38.933	0	323.31	61958000000	7171	A0A6N4CUN3	A0A6N4CUN3
A0A6N4CUN4	Ubiquinol-cytochrome c reductase iron-sulfur subunit (EC 7.1.1.8)	petA ASJ32_16470 GO994_02050	TAT(Tat/SPI)	CytoplasmicMembrane	C	Component of the ubiquinol-cytochrome c reductase complex (complex III or cytochrome b-c1 complex), which is a respiratory chain that generates an electrochemical potential coupled to ATP synthesis	Chromosome	23.6585	24.2458	25.3205	25.1057	18	18	18	64.5	64.5	64.5	21.182	0	162.89	3225500000	724	A0A6N4CUN4	A0A6N4CUN4
A0A6N4CUN7	3-dehydroquinate synthase (DHQS) (EC 4.2.3.4)	aroB ASJ32_17325	OTHER	Cytoplasmic	E	Catalyzes the conversion of 3-deoxy-D-arabino- heptulosonate 7-phosphate (DAHP) to dehydroquinate (DHQ)	Chromosome	25.8477	25.8246	25.9205	25.736	25	25	25	84.1	84.1	84.1	39.159	0	323.31	3699900000	931	A0A6N4CUN7	A0A6N4CUN7
A0A6N4CUN8	Transcriptional regulator	ASJ32_01260	LIPO(Sec/SPII)	Periplasmic	S	Maltose operon periplasmic protein precursor (MalM)	Chromosome	24.3927	23.2471	NaN	22.8247	25	25	25	80.7	80.7	80.7	33.984	0	323.31	12276000000	2477	A0A6N4CUN8	A0A6N4CUN8
A0A6N4CUP0	Chemotaxis protein CheX	ASJ32_15725 GO994_18630	OTHER	Cytoplasmic	N	CheC-like family	Chromosome	24.7741	24.4052	24.3108	24.5027	15	15	15	74.5	74.5	74.5	16.752	0	156.02	770210000	377	A0A6N4CUP0	A0A6N4CUP0
A0A6N4CUP1	TetR family transcriptional regulator	ASJ32_17195 GO994_05785	OTHER	Unknown	K	transcriptional regulator, tetr family	Chromosome	24.1917	25.0856	25.7761	26.8971	12	12	12	49.3	49.3	49.3	23.054	0	194.61	799470000	217	A0A6N4CUP1	A0A6N4CUP1
A0A6N4CUP7	N-succinylglutamate 5-semialdehyde dehydrogenase (EC 1.2.1.71) (Succinylglutamic semialdehyde dehydrogenase) (SGSD)	astD ASJ32_17375	OTHER	Cytoplasmic	C	Catalyzes the NAD-dependent reduction of succinylglutamate semialdehyde into succinylglutamate	Chromosome	26.1542	26.336	26.479	25.4122	30	30	30	63	63	63	52.016	0	323.31	3162600000	1418	A0A6N4CUP7	A0A6N4CUP7
A0A6N4CUP8	Lon protease (EC 3.4.21.53) (ATP-dependent protease La)	lon ASJ32_16845	OTHER	Cytoplasmic	O	ATP-dependent serine protease that mediates the selective degradation of mutant and abnormal proteins as well as certain short-lived regulatory proteins. Required for cellular homeostasis and for survival from DNA damage and developmental changes induced by stress. Degrades polypeptides processively to yield small peptide fragments that are 5 to 10 amino acids long. Binds to DNA in a double-stran…	Chromosome	27.0998	27.0562	26.7924	27.336	125	125	125	88.8	88.8	88.8	87.764	0	323.31	42070000000	9916	A0A6N4CUP8	A0A6N4CUP8
A0A6N4CUQ3	FAD-binding protein	ASJ32_14940	OTHER	Unknown	C	oxidoreductase	Chromosome	24.841	23.0216	23.1878	25.0986	34	34	34	71.3	71.3	71.3	51.994	0	323.31	2401100000	757	A0A6N4CUQ3	A0A6N4CUQ3
A0A6N4CUQ5	3-oxoacyl-[acyl-carrier-protein] reductase (EC 1.1.1.100)	fabG ASJ32_12805 GO994_11640	OTHER	Cytoplasmic	IQ	COG1028 Dehydrogenases with different specificities (related to short-chain alcohol dehydrogenases)	Chromosome	28.562	27.7605	28.9474	28.898	25	25	25	94.3	94.3	94.3	25.762	0	323.31	24684000000	4081	A0A6N4CUQ5	A0A6N4CUQ5
A0A6N4CUQ7	3-oxoacyl-ACP synthase (EC 2.3.1.41) (Beta-ketoacyl-ACP synthase)	ASJ32_04690 GO994_04830	SP(Sec/SPI)	Cytoplasmic	IQ	Beta-ketoacyl synthase, C-terminal domain	Chromosome	23.2101	22.5291	22.6485	20.9845	12	12	12	44.1	44.1	44.1	43.203	0	323.31	500550000	360	A0A6N4CUQ7	A0A6N4CUQ7
A0A6N4CUQ8	Transcription-repair-coupling factor (TRCF) (EC 3.6.4.-)	mfd ASJ32_16895	OTHER	Cytoplasmic	L	Couples transcription and DNA repair by recognizing RNA polymerase (RNAP) stalled at DNA lesions. Mediates ATP-dependent release of RNAP and its truncated transcript from the DNA, and recruitment of nucleotide excision repair machinery to the damaged site	Chromosome	24.0971	23.3479	23.8874	24.018	94	94	94	71.4	71.4	71.4	128.92	0	323.31	2027100000	1355	A0A6N4CUQ8	A0A6N4CUQ8
A0A6N4CUR3	Short-chain dehydrogenase	ASJ32_15830	OTHER	Unknown	S	short-chain dehydrogenase	Chromosome	23.198	23.5755	24.1567	23.5894	16	16	16	68.4	68.4	68.4	24.218	0	225.37	407270000	277	A0A6N4CUR3	A0A6N4CUR3
A0A6N4CUR7	Ribosomal RNA small subunit methyltransferase F (EC 2.1.1.178) (16S rRNA m5C1407 methyltransferase) (rRNA (cytosine-C(5)-)-methyltransferase RsmF)	yebU rsmF ASJ32_12855	OTHER	Cytoplasmic	J	Specifically methylates the cytosine at position 1407 (m5C1407) of 16S rRNA	Chromosome	22.295	21.3807	23.0302	21.9063	23	23	23	58.4	58.4	58.4	52.947	0	318.98	653940000	345	A0A6N4CUR7	A0A6N4CUR7
A0A6N4CUS1	DNA primase (EC 2.7.7.101)	dnaG ASJ32_17800 GO994_04010	OTHER	Cytoplasmic	L	RNA polymerase that catalyzes the synthesis of short RNA molecules used as primers for DNA polymerase during DNA replication	Chromosome	23.0516	22.4281	21.553	22.3568	42	42	42	61	61	61	66.649	0	306.53	598630000	358	A0A6N4CUS1	A0A6N4CUS1
A0A6N4CUS4	Outer membrane channel protein (Outer membrane channel protein TolC)	tolC ASJ32_15930 GO994_19545	SP(Sec/SPI)	OuterMembrane	MU	Outer membrane efflux protein	Chromosome	23.7312	24.4611	25.5991	24.2755	69	69	69	92.5	92.5	92.5	48.895	0	323.31	29151000000	8006	A0A6N4CUS4	A0A6N4CUS4
A0A6N4CUS5	Ribosomal RNA large subunit methyltransferase H (EC 2.1.1.177) (23S rRNA (pseudouridine1915-N3)-methyltransferase) (23S rRNA m3Psi1915 methyltransferase) (rRNA (pseudouridine-N3-)-methyltransferase RlmH)	rlmH ASJ32_17005	OTHER	Unknown	J	Specifically methylates the pseudouridine at position 1915 (m3Psi1915) in 23S rRNA	Chromosome	21.5426	21.0689	21.8491	22.1251	15	15	15	78.1	78.1	78.1	17.241	0	88.27	234440000	196	A0A6N4CUS5	A0A6N4CUS5
A0A6N4CUS7	Phosphohistidine phosphatase	ASJ32_12915	OTHER	Cytoplasmic	S	granule-associated protein	Chromosome	26.2603	26.676	26.6944	27.0902	29	29	29	91.1	91.1	91.1	20.503	0	323.31	3733900000	817	A0A6N4CUS7	A0A6N4CUS7
A0A6N4CUT0	ATP-dependent Clp protease ATP-binding subunit ClpX	clpX ASJ32_16850	OTHER	Cytoplasmic	O	ATP-dependent specificity component of the Clp protease. It directs the protease to specific substrates. Can perform chaperone functions in the absence of ClpP	Chromosome	27.3191	27.2123	27.0144	27.565	60	60	60	93.2	93.2	93.2	46.463	0	323.31	18563000000	4422	A0A6N4CUT0	A0A6N4CUT0
A0A6N4CUT1	Adenylosuccinate synthetase (AMPSase) (AdSS) (EC 6.3.4.4) (IMP--aspartate ligase)	purA ASJ32_01490 GO994_07020	OTHER	Cytoplasmic	F	Plays an important role in the de novo pathway of purine nucleotide biosynthesis. Catalyzes the first committed step in the biosynthesis of AMP from IMP	Chromosome	29.0973	29.1876	28.5062	28.7803	46	46	46	86.8	86.8	86.8	45.255	0	323.31	20597000000	3012	A0A6N4CUT1	A0A6N4CUT1
A0A6N4CUT2	30S ribosomal protein S15	rpsO ASJ32_04245 GO994_05285	OTHER	Cytoplasmic	J	Forms an intersubunit bridge (bridge B4) with the 23S rRNA of the 50S subunit in the ribosome	Chromosome	30.3119	30.5865	30.6787	31.6193	14	14	14	77.5	77.5	77.5	10.083	0	323.31	49259000000	9066	A0A6N4CUT2	A0A6N4CUT2
A0A6N4CUT4	Probable Fe(2+)-trafficking protein	ASJ32_15985 GO994_19600	OTHER	Unknown	CO	Could be a mediator in iron transactions between iron acquisition and iron-requiring processes, such as synthesis and or repair of Fe-S clusters in biosynthetic enzymes	Chromosome	23.5237	23.5412	21.7371	23.9021	16	16	15	74.4	74.4	74.4	10.581	0	101.1	325170000	196	A0A6N4CUT4	A0A6N4CUT4
A0A6N4CUT6	Ribosomal RNA small subunit methyltransferase H (EC 2.1.1.199) (16S rRNA m(4)C1402 methyltransferase) (rRNA (cytosine-N(4)-)-methyltransferase RsmH)	rsmH ASJ32_15150 GO994_02330	OTHER	Cytoplasmic	J	Specifically methylates the N4 position of cytidine in position 1402 (C1402) of 16S rRNA	Chromosome	25.5055	24.7689	25.8693	25.428	29	29	28	86.9	86.9	84.6	34.395	0	323.31	2501300000	928	A0A6N4CUT6	A0A6N4CUT6
A0A6N4CUT7	Gamma-glutamyl phosphate reductase (GPR) (EC 1.2.1.41) (Glutamate-5-semialdehyde dehydrogenase) (Glutamyl-gamma-semialdehyde dehydrogenase) (GSA dehydrogenase)	proA ASJ32_04840	OTHER	Cytoplasmic	E	Catalyzes the NADPH-dependent reduction of L-glutamate 5-phosphate into L-glutamate 5-semialdehyde and phosphate. The product spontaneously undergoes cyclization to form 1-pyrroline-5- carboxylate	Chromosome	24.8306	25.0307	24.9741	24.8827	43	43	43	71.9	71.9	71.9	44.463	0	323.31	4127800000	2061	A0A6N4CUT7	A0A6N4CUT7
A0A6N4CUT9	Nucleotide-binding protein ASJ32_16380	rapZ ASJ32_16380 GO994_01960	OTHER	Cytoplasmic	S	Displays ATPase and GTPase activities	Chromosome	23.6297	22.3708	NaN	22.8845	17	17	17	59	59	59	32.507	0	210.54	1142100000	439	A0A6N4CUT9	A0A6N4CUT9
A0A6N4CUU3	Fructose-1,6-bisphosphatase class 1 (FBPase class 1) (EC 3.1.3.11) (D-fructose-1,6-bisphosphate 1-phosphohydrolase class 1)	fbp ASJ32_16900 GO994_08630	OTHER	Unknown	G	D-fructose-1,6-bisphosphate 1-phosphohydrolase class 1	Chromosome	27.1692	27.3247	27.1792	26.7992	44	44	44	77.6	77.6	77.6	37.997	0	323.31	4804200000	1570	A0A6N4CUU3	A0A6N4CUU3
A0A6N4CUU4	Glucose-1-phosphate adenylyltransferase (EC 2.7.7.27) (ADP-glucose pyrophosphorylase) (ADPGlc PPase) (ADP-glucose synthase)	glgC ASJ32_16060	OTHER	Cytoplasmic	H	Catalyzes the synthesis of ADP-glucose, a sugar donor used in elongation reactions on alpha-glucans	Chromosome	25.2467	24.4746	24.4996	24.8868	34	34	34	83.2	83.2	83.2	45.325	0	323.31	2196400000	957	A0A6N4CUU4	A0A6N4CUU4
A0A6N4CUU8	ATP-dependent lipid A-core flippase (EC 7.5.2.6) (Lipid A export ATP-binding/permease protein MsbA)	msbA ASJ32_12100	OTHER	CytoplasmicMembrane	V	Involved in lipid A export and possibly also in glycerophospholipid export and for biogenesis of the outer membrane. Transmembrane domains (TMD) form a pore in the inner membrane and the ATP-binding domain (NBD) is responsible for energy generation	Chromosome	22.0952	NaN	23.172	22.762	50	50	50	68.3	68.3	68.3	64.832	0	323.31	7670100000	2042	A0A6N4CUU8	A0A6N4CUU8
A0A6N4CUV0	NAD(P)H-flavin reductase (EC 1.16.1.3) (EC 1.5.1.41)	fre fadI ASJ32_15335 GO994_21835	OTHER	Cytoplasmic	C	Oxidoreductase NAD-binding domain	Chromosome	23.3086	24.0961	NaN	22.7077	13	13	13	56	56	56	26.367	0	155.11	405090000	148	A0A6N4CUV0	A0A6N4CUV0
A0A6N4CUV4	UPF0265 protein ASJ32_16285	ASJ32_16285 GO994_01865	OTHER	Cytoplasmic	S	Belongs to the UPF0265 family	Chromosome	27.8851	27.8374	25.5014	28.2136	19	19	19	89.5	89.5	89.5	12.316	0	323.31	7526000000	1447	A0A6N4CUV4	A0A6N4CUV4
A0A6N4CUV6	Nuclease	ASJ32_04940	SP(Sec/SPI)	Unknown	M	Extracellular nuclease	Chromosome	21.149	22.9791	21.5953	NaN	52	52	52	65.3	65.3	65.3	77.449	0	323.31	463560000	635	A0A6N4CUV6	A0A6N4CUV6
A0A6N4CUV8	Stringent starvation protein A	sspA ASJ32_16485 GO994_02065	OTHER	Cytoplasmic	O	Glutathione S-transferase, C-terminal domain	Chromosome	27.462	27.6347	24.8303	25.4991	21	21	21	78	78	78	23.609	0	323.31	2907700000	788	A0A6N4CUV8	A0A6N4CUV8
A0A6N4CUW0	Riboflavin biosynthesis protein RibD [Includes: Diaminohydroxyphosphoribosylaminopyrimidine deaminase (DRAP deaminase) (EC 3.5.4.26) (Riboflavin-specific deaminase); 5-amino-6-(5-phosphoribosylamino)uracil reductase (EC 1.1.1.193) (HTP reductase)]	ribD ASJ32_04415 GO994_05120	OTHER	Cytoplasmic	H	Converts 2,5-diamino-6-(ribosylamino)-4(3h)-pyrimidinone 5'-phosphate into 5-amino-6-(ribosylamino)-2,4(1h,3h)- pyrimidinedione 5'-phosphate	Chromosome	25.6665	25.936	26.1424	25.8388	41	41	41	84.3	84.3	84.3	40.053	0	323.31	3354300000	1512	A0A6N4CUW0	A0A6N4CUW0
A0A6N4CUW7	Uncharacterized protein	ASJ32_05030 GO994_04440	LIPO(Sec/SPII)	Unknown	-	-	Chromosome	20.7071	20.7606	21.4803	22.0575	11	11	11	66.5	66.5	66.5	17.484	0	323.31	7578600000	3130	A0A6N4CUW7	A0A6N4CUW7
A0A6N4CUX1	Nucleotide-binding protein	ASJ32_14610	OTHER	Cytoplasmic	J	S1 domain	Chromosome	25.6908	26.0704	26.1847	25.8199	30	30	30	74.3	74.3	74.3	32.224	0	323.31	1140200000	496	A0A6N4CUX1	A0A6N4CUX1
A0A6N4CUZ8	Glycine/betaine ABC transporter substrate-binding protein	proX ASJ32_04645	SP(Sec/SPI)	Periplasmic	E	glycine, betaine	Chromosome	24.0957	24.6644	23.3363	22.3068	19	19	19	55.4	55.4	55.4	36.272	0	323.31	546830000	337	A0A6N4CUZ8	A0A6N4CUZ8
A0A6N4CUZ9	Peptidase	ASJ32_16490	OTHER	Unknown	S	Stringent starvation protein B	Chromosome	22.9558	21.8361	NaN	21.8575	5	5	5	67.4	67.4	67.4	15.711	0	126.06	319400000	158	A0A6N4CUZ9	A0A6N4CUZ9
A0A6N4CV05	Purine nucleoside phosphorylase DeoD-type (PNP) (EC 2.4.2.1)	deoD ASJ32_15665 GO994_18560	OTHER	Cytoplasmic	F	Phosphorylase superfamily	Chromosome	26.9504	27.4625	26.8277	26.6499	31	31	31	98.7	98.7	98.7	25.805	0	323.31	7960200000	2419	A0A6N4CV05	A0A6N4CV05
A0A6N4CV06	Peptide ABC transporter substrate-binding protein	ASJ32_12440	SP(Sec/SPI)	Periplasmic	E	Bacterial extracellular solute-binding proteins, family 5 Middle	Chromosome	23.9163	22.9345	NaN	23.6921	29	29	29	57.5	57.5	57.5	61.769	0	323.31	253470000	262	A0A6N4CV06	A0A6N4CV06
A0A6N4CV09	3-ketoacyl-ACP reductase (EC 1.1.1.100) (3-oxoacyl-ACP reductase FabG)	fabG ASJ32_04695 GO994_04825	OTHER	Cytoplasmic	IQ	Enoyl-(Acyl carrier protein) reductase	Chromosome	22.0453	21.875	22.957	21.5642	17	17	17	65.1	65.1	65.1	25.429	0	322.7	184380000	193	A0A6N4CV09	A0A6N4CV09
A0A6N4CV11	Acetyltransferase component of pyruvate dehydrogenase complex (EC 2.3.1.12)	aceF ASJ32_15005	OTHER	Cytoplasmic	C	The pyruvate dehydrogenase complex catalyzes the overall conversion of pyruvate to acetyl-CoA and CO(2)	Chromosome	28.9794	29.097	28.9216	29.1375	69	69	69	69.2	69.2	69.2	64.926	0	323.31	51062000000	9748	A0A6N4CV11	A0A6N4CV11
A0A6N4CV13	Acetylornithine aminotransferase (ACOAT) (EC 2.6.1.11)	astC argD ASJ32_17365 GO994_05955	OTHER	Cytoplasmic	E	acetylornithine aminotransferase	Chromosome	28.0299	28.3122	28.033	27.2785	52	52	51	84.2	84.2	83.5	43.398	0	323.31	10792000000	2464	A0A6N4CV13	A0A6N4CV13
A0A6N4CV19	Metalloprotease PmbA (Protein PmbA)	pmbA ASJ32_16300 GO994_01880	OTHER	Cytoplasmic	S	Putative modulator of DNA gyrase	Chromosome	24.895	24.9959	25.0947	24.8622	36	36	36	72.7	72.7	72.7	47.99	0	323.31	4446700000	1299	A0A6N4CV19	A0A6N4CV19
A0A6N4CV25	Pyrroline-5-carboxylate reductase (P5C reductase) (P5CR) (EC 1.5.1.2) (PCA reductase)	proC ASJ32_15770	OTHER	CytoplasmicMembrane	E	Catalyzes the reduction of 1-pyrroline-5-carboxylate (PCA) to L-proline	Chromosome	25.4384	25.3782	25.726	24.7659	21	21	21	66.8	66.8	66.8	28.771	0	323.31	1240600000	545	A0A6N4CV25	A0A6N4CV25
A0A6N4CV26	Glucokinase (EC 2.7.1.2) (Glucose kinase)	glk ASJ32_14135	OTHER	Cytoplasmic	F	Belongs to the bacterial glucokinase family	Chromosome	23.7685	24.0365	23.4565	22.5787	17	17	17	59.3	59.3	59.3	34.131	0	314.18	532140000	436	A0A6N4CV26	A0A6N4CV26
A0A6N4CV27	UDP-N-acetylglucosamine--N-acetylmuramyl-(pentapeptide) pyrophosphoryl-undecaprenol N-acetylglucosamine transferase (EC 2.4.1.227) (Undecaprenyl-PP-MurNAc-pentapeptide-UDPGlcNAc GlcNAc transferase)	murG ASJ32_15110 GO994_02370	OTHER	CytoplasmicMembrane	M	Cell wall formation. Catalyzes the transfer of a GlcNAc subunit on undecaprenyl-pyrophosphoryl-MurNAc-pentapeptide (lipid intermediate I) to form undecaprenyl-pyrophosphoryl-MurNAc- (pentapeptide)GlcNAc (lipid intermediate II)	Chromosome	23.1091	22.5098	22.9005	23.8645	26	26	26	70.1	70.1	70.1	37.95	0	323.31	4485300000	1069	A0A6N4CV27	A0A6N4CV27
A0A6N4CV31	HTH-type transcriptional regulator GalR (Transcriptional regulator)	galR ASJ32_11570 GO994_12770	OTHER	Cytoplasmic	K	Periplasmic binding protein-like domain	Chromosome	24.5066	24.4978	24.8506	25.2172	27	27	27	79.9	79.9	79.9	36.31	0	323.31	1400400000	635	A0A6N4CV31	A0A6N4CV31
A0A6N4CV34	Uncharacterized protein	ASJ32_14185	SP(Sec/SPI)	CytoplasmicMembrane	S	(twin-arginine translocation) pathway signal	Chromosome	23.4003	23.477	21.9232	21.697	19	19	19	56.7	56.7	56.7	28.208	0	323.31	414620000	234	A0A6N4CV34	A0A6N4CV34
A0A6N4CV37	Phosphate transport regulator (TIGR00153 family protein)	ASJ32_15955 GO994_19570	OTHER	Cytoplasmic	P	Protein of unknown function DUF47	Chromosome	24.4457	23.4928	24.017	24.4884	31	31	31	90.3	90.3	90.3	25.956	0	323.31	4846200000	1555	A0A6N4CV37	A0A6N4CV37
A0A6N4CV55	TIGR04219 family outer membrane beta-barrel protein	ASJ32_15825 GO994_18730	SP(Sec/SPI)	Unknown	M	Has lipid A 3-O-deacylase activity. Hydrolyzes the ester bond at the 3 position of lipid A, a bioactive component of lipopolysaccharide (LPS), thereby releasing the primary fatty acyl moiety	Chromosome	23.8197	23.992	24.5765	24.1479	26	26	26	65.1	65.1	65.1	23.121	0	323.31	39528000000	5366	A0A6N4CV55	A0A6N4CV55
A0A6N4CV57	Glutamate--tRNA ligase (EC 6.1.1.17) (Glutamyl-tRNA synthetase) (GluRS)	gltX ASJ32_04965	OTHER	Cytoplasmic	J	Catalyzes the attachment of glutamate to tRNA(Glu) in a two-step reaction glutamate is first activated by ATP to form Glu-AMP and then transferred to the acceptor end of tRNA(Glu)	Chromosome	26.939	26.9937	26.8178	26.4123	59	59	59	94.7	94.7	94.7	52.818	0	323.31	9640500000	3197	A0A6N4CV57	A0A6N4CV57
A0A6N4CV60	Oligopeptidase A	ASJ32_15280	OTHER	Cytoplasmic	E	Peptidase family M3	Chromosome	27.1078	27.463	27.3088	26.9398	62	62	62	67.9	67.9	67.9	76.58	0	323.31	11706000000	3624	A0A6N4CV60	A0A6N4CV60
A0A6N4CV62	LppC family lipoprotein	ASJ32_16510	OTHER	Unknown	M	LppC putative lipoprotein	Chromosome	22.2752	21.9152	23.5395	23.3235	39	39	39	81.3	81.3	81.3	64.677	0	323.31	5779700000	2536	A0A6N4CV62	A0A6N4CV62
A0A6N4CV68	Diguanylate phosphodiesterase (EAL domain-containing protein)	ASJ32_05035 GO994_04435	OTHER	CytoplasmicMembrane	T	GGDEF domain	Chromosome	21.8006	21.4434	22.0931	21.9214	40	40	40	66.1	66.1	66.1	73.978	0	323.31	716370000	549	A0A6N4CV68	A0A6N4CV68
A0A6N4CV69	3-octaprenyl-4-hydroxybenzoate carboxy-lyase (EC 4.1.1.98) (Polyprenyl p-hydroxybenzoate decarboxylase)	ubiD ASJ32_15330	OTHER	Cytoplasmic	H	Catalyzes the decarboxylation of 3-octaprenyl-4-hydroxy benzoate to 2-octaprenylphenol, an intermediate step in ubiquinone biosynthesis	Chromosome	25.1896	25.7114	25.8504	24.9495	32	32	32	58.3	58.3	58.3	55.072	0	323.31	1434200000	640	A0A6N4CV69	A0A6N4CV69
A0A6N4CV77	Sulfurtransferase (Thiosulfate sulfurtransferase)	ASJ32_05100 GO994_04375	SP(Sec/SPI)	Periplasmic	M	Rhodanese Homology Domain	Chromosome	24.2664	24.83	23.8802	23.4705	43	43	43	83.3	83.3	83.3	48.313	0	323.31	1270800000	830	A0A6N4CV77	A0A6N4CV77
A0A6N4CV79	Hydrolase	ASJ32_17200	OTHER	Cytoplasmic	-	-	Chromosome	24.2389	23.9317	22.0687	23.4967	13	13	13	66.8	66.8	66.8	26.498	0	323.31	1386000000	575	A0A6N4CV79	A0A6N4CV79
A0A6N4CVA2	MarR family transcriptional regulator	ASJ32_03245	OTHER	Unknown	K	helix_turn_helix multiple antibiotic resistance protein	Chromosome	24.1545	23.8847	24.6893	24.779	12	12	12	75.5	75.5	75.5	17.932	0	93.282	527220000	333	A0A6N4CVA2	A0A6N4CVA2
A0A6N4CVA3	Shikimate kinase (SK) (EC 2.7.1.71)	aroK ASJ32_17320	OTHER	Cytoplasmic	F	Catalyzes the specific phosphorylation of the 3-hydroxyl group of shikimic acid using ATP as a cosubstrate	Chromosome	25.7621	26.1908	26.237	24.924	18	18	18	83.1	83.1	83.1	19.446	0	323.31	1664300000	520	A0A6N4CVA3	A0A6N4CVA3
A0A6N4CVA5	DUF4426 domain-containing protein	ASJ32_15785 GO994_18690	SP(Sec/SPI)	Unknown	S	Domain of unknown function (DUF4426)	Chromosome	22.5543	NaN	22.634	21.7197	9	9	9	59	59	59	15.694	0	154.3	189520000	167	A0A6N4CVA5	A0A6N4CVA5
A0A6N4CVB2	Phosphoenolpyruvate carboxylase (PEPC) (PEPCase) (EC 4.1.1.31)	ppc ASJ32_03300 GO994_20700	OTHER	Cytoplasmic	H	Forms oxaloacetate, a four-carbon dicarboxylic acid source for the tricarboxylic acid cycle	Chromosome	27.9615	28.4055	27.8474	27.7716	110	110	110	86.2	86.2	86.2	99.047	0	323.31	25478000000	6112	A0A6N4CVB2	A0A6N4CVB2
A0A6N4CVB3	Fatty acid oxidation complex subunit alpha [Includes: Enoyl-CoA hydratase/Delta(3)-cis-Delta(2)-trans-enoyl-CoA isomerase/3-hydroxybutyryl-CoA epimerase (EC 4.2.1.17) (EC 5.1.2.3) (EC 5.3.3.8); 3-hydroxyacyl-CoA dehydrogenase (EC 1.1.1.35)]	fadB ASJ32_15530	OTHER	Cytoplasmic	I	Involved in the aerobic and anaerobic degradation of long-chain fatty acids via beta-oxidation cycle. Catalyzes the formation of 3-oxoacyl-CoA from enoyl-CoA via L-3-hydroxyacyl-CoA. It can also use D-3-hydroxyacyl-CoA and cis-3-enoyl-CoA as substrate	Chromosome	22.6461	21.7436	22.736	23.3745	56	56	56	64.6	64.6	64.6	76.375	0	323.31	2071700000	906	A0A6N4CVB3	A0A6N4CVB3
A0A6N4CVB4	DNA repair protein RadA	radA ASJ32_15690 GO994_18585	OTHER	Unknown	O	DNA-dependent ATPase involved in processing of recombination intermediates, plays a role in repairing DNA breaks. Stimulates the branch migration of RecA-mediated strand transfer reactions, allowing the 3' invading strand to extend heteroduplex DNA faster. Binds ssDNA in the presence of ADP but not other nucleotides, has ATPase activity that is stimulated by ssDNA and various branched DNA structu…	Chromosome	20.9422	20.315	22.6669	22.5335	32	32	32	66.1	66.1	66.1	48.912	0	323.31	1370300000	614	A0A6N4CVB4	A0A6N4CVB4
A0A6N4CVB6	Putative agmatine deiminase (EC 3.5.3.12) (Agmatine iminohydrolase)	aguA ASJ32_15840 GO994_18745	OTHER	Cytoplasmic	E	agmatine deiminase	Chromosome	25.2215	25.3535	25.9842	24.9585	28	28	28	64.9	64.9	64.9	40.172	0	323.31	1009300000	740	A0A6N4CVB6	A0A6N4CVB6
A0A6N4CVB7	ATP-dependent Clp protease proteolytic subunit (EC 3.4.21.92) (Endopeptidase Clp)	clpP ASJ32_16855	OTHER	Cytoplasmic	OU	Cleaves peptides in various proteins in a process that requires ATP hydrolysis. Has a chymotrypsin-like activity. Plays a major role in the degradation of misfolded proteins	Chromosome	28.4569	28.7777	28.737	28.1822	16	16	16	57.5	57.5	57.5	22.814	0	323.31	13076000000	1538	A0A6N4CVB7	A0A6N4CVB7
A0A6N4CVB8	Two-component system response regulator	ASJ32_14145	OTHER	Cytoplasmic	KT	Transcriptional regulatory protein, C terminal	Chromosome	21.7674	20.7911	20.3053	NaN	16	16	16	49.1	49.1	49.1	25.351	0	134.89	218500000	211	A0A6N4CVB8	A0A6N4CVB8
A0A6N4CVB9	Trehalose repressor	treR ASJ32_16130	OTHER	Cytoplasmic	K	trehalose operon repressor	Chromosome	24.2549	24.1497	25.0948	24.2891	23	23	23	68.9	68.9	68.9	34.087	0	323.31	479670000	356	A0A6N4CVB9	A0A6N4CVB9
A0A6N4CVC0	Electron transporter RnfB	ASJ32_11110	OTHER	Cytoplasmic	C	Electron transfer flavoprotein domain	Chromosome	23.1002	24.2982	24.2487	NaN	14	14	14	74.4	74.4	74.4	26.954	0	37.029	113430000	59	A0A6N4CVC0	A0A6N4CVC0
A0A6N4CVC9	Peptide ABC transporter substrate-binding protein	ASJ32_16905	SP(Sec/SPI)	Periplasmic	E	Bacterial extracellular solute-binding proteins, family 5 Middle	Chromosome	22.9691	22.9515	22.9066	21.7457	42	42	42	77.3	77.3	77.3	59.995	0	323.31	1357200000	938	A0A6N4CVC9	A0A6N4CVC9
A0A6N4CVD6	Peptidase M3	ASJ32_03450 GO994_19015	OTHER	Unknown	E	Peptidase family M3	Chromosome	24.7762	24.9353	24.388	24.3768	40	40	40	51.8	51.8	51.8	68.805	0	323.31	1592100000	642	A0A6N4CVD6	A0A6N4CVD6
A0A6N4CVD7	Uncharacterized protein	ASJ32_11210	SP(Sec/SPI)	Unknown	O	Highly conserved protein containing a thioredoxin domain	Chromosome	24.8071	25.8685	25.0832	23.8232	44	44	44	55.6	55.6	55.6	70.602	0	323.31	3930600000	1957	A0A6N4CVD7	A0A6N4CVD7
A0A6N4CVE0	Amidase (EC 3.5.1.4)	ASJ32_15845 GO994_18750	OTHER	Cytoplasmic	J	Amidase	Chromosome	24.1021	23.9847	24.2541	24.227	43	43	43	69.8	69.8	69.8	60.693	0	323.31	803030000	616	A0A6N4CVE0	A0A6N4CVE0
A0A6N4CVE1	Protein phosphatase CheZ (EC 3.1.3.-) (Chemotaxis protein CheZ)	ASJ32_14300	OTHER	Cytoplasmic	NT	Plays an important role in bacterial chemotaxis signal transduction pathway by accelerating the dephosphorylation of phosphorylated CheY (CheY-P)	Chromosome	22.7888	22.3808	20.9288	22.628	12	12	12	54.9	54.9	54.9	27.366	0	216.46	183560000	201	A0A6N4CVE1	A0A6N4CVE1
A0A6N4CVE4	Dihydrolipoyl dehydrogenase (EC 1.8.1.4)	lpdA ASJ32_15000 GO994_02485	OTHER	Cytoplasmic	C	COG1249 Pyruvate 2-oxoglutarate dehydrogenase complex, dihydrolipoamide dehydrogenase (E3) component, and related enzymes	Chromosome	29.191	29.5921	29.6692	29.2032	68	68	68	74.3	74.3	74.3	50.368	0	323.31	52860000000	10099	A0A6N4CVE4	A0A6N4CVE4
A0A6N4CVE6	Chaperone protein HtpG (Heat shock protein HtpG) (High temperature protein G)	htpG ASJ32_11265 GO994_14185	OTHER	Cytoplasmic	O	Molecular chaperone. Has ATPase activity	Chromosome	29.4479	29.4518	29.3251	29.0842	102	102	102	97.5	97.5	97.5	71.728	0	323.31	75269000000	15314	A0A6N4CVE6	A0A6N4CVE6
A0A6N4CVE8	Arabinose 5-phosphate isomerase (API) (EC 5.3.1.13)	ASJ32_16340 GO994_01920	OTHER	Cytoplasmic	M	Arabinose 5-phosphate isomerase	Chromosome	24.2067	24.0339	23.7926	23.9885	23	23	23	78.5	78.5	78.5	34.955	0	323.31	934530000	559	A0A6N4CVE8	A0A6N4CVE8
A0A6N4CVE9	CNNM family magnesium/cobalt transport protein CorC (Magnesium/cobalt efflux protein)	corC ASJ32_17050 GO994_05640	OTHER	CytoplasmicMembrane	P	Magnesium and cobalt efflux protein CorC	Chromosome	25.1325	25.3919	25.1956	25.3369	23	23	23	58.2	58.2	58.2	33.484	0	323.31	2503500000	962	A0A6N4CVE9	A0A6N4CVE9
A0A6N4CVF5	Cell division protein ZapD (Z ring-associated protein D)	zapD ASJ32_15055	OTHER	Unknown	D	Cell division factor that enhances FtsZ-ring assembly. Directly interacts with FtsZ and promotes bundling of FtsZ protofilaments, with a reduction in FtsZ GTPase activity	Chromosome	23.3903	21.821	21.7986	24.1116	22	22	22	94.2	94.2	94.2	27.76	0	264.94	780290000	414	A0A6N4CVF5	A0A6N4CVF5
A0A6N4CVF7	Nitroreductase	ASJ32_17100 GO994_05690	OTHER	Unknown	S	Nitroreductase	Chromosome	25.6306	26.2872	24.7454	24.6072	21	21	21	89.5	89.5	89.5	22.584	0	215.97	2365200000	467	A0A6N4CVF7	A0A6N4CVF7
A0A6N4CVG3	UDP-N-acetylmuramate--L-alanine ligase (EC 6.3.2.8) (UDP-N-acetylmuramoyl-L-alanine synthetase)	murC ASJ32_15105	OTHER	Cytoplasmic	M	Belongs to the MurCDEF family	Chromosome	22.0718	20.749	NaN	23.0454	38	38	38	68.4	68.4	68.4	52.214	0	323.31	2573100000	1084	A0A6N4CVG3	A0A6N4CVG3
A0A6N4CVG5	Uncharacterized protein	ASJ32_03105 GO994_20500	OTHER	Cytoplasmic	-	-	Chromosome	23.0175	21.4289	NaN	22.7622	12	12	12	43.9	43.9	43.9	34.189	0	207.12	324760000	257	A0A6N4CVG5	A0A6N4CVG5
A0A6N4CVG6	Periplasmic serine endoprotease DegP-like (EC 3.4.21.107)	ASJ32_16445 GO994_02025	SP(Sec/SPI)	Periplasmic	M	Belongs to the peptidase S1C family	Chromosome	28.346	28.4671	28.9814	28.5985	58	58	58	78.4	78.4	78.4	47.76	0	323.31	34214000000	6026	A0A6N4CVG6	A0A6N4CVG6
A0A6N4CVG9	Deoxyribose-phosphate aldolase (DERA) (EC 4.1.2.4) (2-deoxy-D-ribose 5-phosphate aldolase) (Phosphodeoxyriboaldolase) (Deoxyriboaldolase)	deoC ASJ32_15650 GO994_18545	OTHER	Cytoplasmic	F	Catalyzes a reversible aldol reaction between acetaldehyde and D-glyceraldehyde 3-phosphate to generate 2-deoxy- D-ribose 5-phosphate	Chromosome	23.4149	23.0393	23.4218	21.9248	19	19	19	76.7	76.7	76.7	27.403	0	238.3	357840000	314	A0A6N4CVG9	A0A6N4CVG9
A0A6N4CVH0	Lipase	ASJ32_15345	LIPO(Sec/SPII)	Extracellular	I	Bacterial virulence factor lipase N-terminal	Chromosome	24.1374	23.8375	24.6538	23.8689	42	42	42	68.4	68.4	68.4	82.553	0	323.31	9891500000	5056	A0A6N4CVH0	A0A6N4CVH0
A0A6N4CVH1	Dyp-type peroxidase (Peroxidase)	ASJ32_03680 GO994_18470	OTHER	Cytoplasmic	P	Dyp-type peroxidase family	Chromosome	23.4959	23.3978	23.2623	21.6574	18	18	18	64.1	64.1	64.1	33.243	0	120.02	323090000	215	A0A6N4CVH1	A0A6N4CVH1
A0A6N4CVH5	Phage shock protein A	ASJ32_03155	OTHER	CytoplasmicMembrane	KT	PspA/IM30 family	Chromosome	24.2185	24.1394	24.6707	24.6377	21	20	20	89.5	86.2	86.2	24.064	0	142.97	302070000	196	A0A6N4CVH5	A0A6N4CVH5
A0A6N4CVH6	Divisome-associated lipoprotein YraP	yraP ASJ32_16495 GO994_02075	LIPO(Sec/SPII)	Periplasmic	S	BON domain	Chromosome	22.0951	21.9966	23.2582	22.0044	28	28	28	80.2	80.2	80.2	20.439	0	323.31	6300100000	1602	A0A6N4CVH6	A0A6N4CVH6
A0A6N4CVH7	Substrate-binding domain-containing protein (Transcriptional regulator)	ASJ32_15395 GO994_21775	OTHER	Cytoplasmic	K	periplasmic binding protein LacI transcriptional regulator	Chromosome	25.1825	25.3343	25.2246	25.2368	29	29	29	78.1	78.1	78.1	36.905	0	323.31	2197500000	894	A0A6N4CVH7	A0A6N4CVH7
A0A6N4CVI0	DNA-binding protein (DNA-binding protein HU-alpha)	hupA ASJ32_15705 GO994_18605	OTHER	Cytoplasmic	L	Histone-like DNA-binding protein which is capable of wrapping DNA to stabilize it, and thus to prevent its denaturation under extreme environmental conditions	Chromosome	29.6014	29.8863	31.0056	30.8781	19	19	19	96.7	96.7	96.7	9.3987	0	323.31	36726000000	3329	A0A6N4CVI0	A0A6N4CVI0
A0A6N4CVJ0	6-phospho-alpha-glucosidase	ASJ32_15400	OTHER	Cytoplasmic	G	Family 4 glycosyl hydrolase	Chromosome	23.4211	23.4294	24.341	23.1617	25	25	25	51.9	51.9	51.9	49.066	0	323.31	565170000	405	A0A6N4CVJ0	A0A6N4CVJ0
A0A6N4CVK0	Antibiotic acetyltransferase	ASJ32_15805 GO994_18710	OTHER	Cytoplasmic	S	COG0110 Acetyltransferase (isoleucine patch superfamily)	Chromosome	22.2282	22.6591	23.7464	NaN	8	8	8	57.3	57.3	57.3	24.709	0	109.51	59854000	110	A0A6N4CVK0	A0A6N4CVK0
A0A6N4CVK3	Lytic transglycosylase	ASJ32_14565	SP(Sec/SPI)	CytoplasmicMembrane	M	Transglycosylase SLT domain	Chromosome	23.6478	22.3425	24.6623	23.4581	7	7	7	26.6	26.6	26.6	35.37	0	29.488	221870000	87	A0A6N4CVK3	A0A6N4CVK3
A0A6N4CVK4	Sulfur carrier protein TusA	tusA ASJ32_15500	OTHER	Cytoplasmic	O	Sulfur carrier protein which probably makes part of a sulfur-relay system	Chromosome	22.7102	22.8811	22.055	22.9238	6	6	6	90.1	90.1	90.1	9.1605	0	65.148	87360000	87	A0A6N4CVK4	A0A6N4CVK4
A0A6N4CVK5	Nitrogen regulatory protein P-II (Transcriptional regulator)	glnB ASJ32_03890 GO994_18250	OTHER	CytoplasmicMembrane	K	Belongs to the P(II) protein family	Chromosome	27.6673	27.479	26.6151	27.1642	22	22	19	98.2	98.2	98.2	12.553	0	255.92	3072800000	737	A0A6N4CVK5	A0A6N4CVK5
A0A6N4CVL1	UPF0149 family protein	ASJ32_14615 GO994_12535	OTHER	Unknown	S	Uncharacterised protein family (UPF0149)	Chromosome	22.932	23.2897	21.0908	23.1392	17	17	17	56.7	56.7	56.7	45.376	0	315.64	504200000	307	A0A6N4CVL1	A0A6N4CVL1
A0A6N4CVL9	Pathogenicity locus	ASJ32_15910	OTHER	Unknown	-	-	Chromosome	22.7582	21.74	21.9696	22.4131	7	7	7	45.7	45.7	45.7	9.6379	0	88.986	128240000	110	A0A6N4CVL9	A0A6N4CVL9
A0A6N4CVM3	Peptidase M16	ASJ32_03995	SP(Sec/SPI)	Unknown	S	Insulinase (Peptidase family M16)	Chromosome	27.3202	27.6279	27.9079	26.8809	123	123	123	88.3	88.3	88.3	102.85	0	323.31	19183000000	7063	A0A6N4CVM3	A0A6N4CVM3
A0A6N4CVM4	Oxidoreductase	ASJ32_14735	OTHER	Cytoplasmic	S	Oxidoreductase	Chromosome	22.5737	22.9442	22.9318	21.5335	15	15	15	45.8	45.8	45.8	35.662	0	100.6	184290000	178	A0A6N4CVM4	A0A6N4CVM4
A0A6N4CVM6	UPF0307 protein ASJ32_16295	ASJ32_16295	OTHER	Cytoplasmic	S	Belongs to the UPF0307 family	Chromosome	26.1649	26.7308	23.8196	23.9955	25	25	25	85.6	85.6	85.6	20.615	0	323.31	3314300000	658	A0A6N4CVM6	A0A6N4CVM6
A0A6N4CVM7	Pyruvate dehydrogenase complex transcriptional repressor PdhR (Transcriptional regulator PdhR)	pdhR ASJ32_15015 GO994_02470	OTHER	Cytoplasmic	K	FCD	Chromosome	21.8822	22.3735	NaN	23.0991	14	14	14	63.8	63.8	63.8	28.674	0	90.234	406640000	189	A0A6N4CVM7	A0A6N4CVM7
A0A6N4CVN5	3-deoxy-D-manno-octulosonate 8-phosphate phosphatase KdsC (EC 3.1.3.45) (KDO 8-P phosphatase)	ASJ32_16345	OTHER	Cytoplasmic	S	Involved in the biosynthesis of lipopolysaccharides (LPSs). Catalyzes the hydrolysis of 3-deoxy-D-manno-octulosonate 8-phosphate (KDO 8-P) to 3-deoxy-D-manno-octulosonate (KDO) and inorganic phosphate	Chromosome	24.5788	24.3836	25.3572	24.8268	12	12	12	83.7	83.7	83.7	19.575	0	182.57	393050000	239	A0A6N4CVN5	A0A6N4CVN5
A0A6N4CVN7	TPR_REGION domain-containing protein	ASJ32_15070	OTHER	Unknown	S	Tetratricopeptide repeat	Chromosome	21.8068	22.3293	NaN	23.0407	29	29	29	71.8	71.8	71.8	43.426	0	323.31	870080000	462	A0A6N4CVN7	A0A6N4CVN7
A0A6N4CVN8	Thioredoxin	trxA ASJ32_15315 GO994_21855	OTHER	Cytoplasmic	O	Belongs to the thioredoxin family	Chromosome	27.2659	25.929	26.4262	26.5208	18	18	18	82.4	82.4	82.4	11.718	0	323.31	3507400000	1115	A0A6N4CVN8	A0A6N4CVN8
A0A6N4CVP0	Multifunctional fatty acid oxidation complex subunit alpha (EC 1.1.1.35) (EC 4.2.1.17) (EC 5.1.2.3)	fadJ ASJ32_14470	OTHER	Cytoplasmic	I	Catalyzes the formation of a hydroxyacyl-CoA by addition of water on enoyl-CoA. Also exhibits 3-hydroxyacyl-CoA epimerase and 3-hydroxyacyl-CoA dehydrogenase activities	Chromosome	27.1252	26.5145	27.3408	27.4976	64	64	64	68.4	68.4	68.4	77.138	0	323.31	2998300000	1123	A0A6N4CVP0	A0A6N4CVP0
A0A6N4CVP2	Protein translocase subunit SecA	secA azi div ASJ32_15075	OTHER	Cytoplasmic	U	Part of the Sec protein translocase complex. Interacts with the SecYEG preprotein conducting channel. Has a central role in coupling the hydrolysis of ATP to the transfer of proteins into and across the cell membrane, serving both as a receptor for the preprotein-SecB complex and as an ATP-driven molecular motor driving the stepwise translocation of polypeptide chains across the membrane	Chromosome	28.1631	27.4891	27.1197	27.8733	128	128	126	93.2	93.2	93.2	102.31	0	323.31	51311000000	12682	A0A6N4CVP2	A0A6N4CVP2
A0A6N4CVP3	UDP-N-acetylmuramoylalanine--D-glutamate ligase (EC 6.3.2.9) (D-glutamic acid-adding enzyme) (UDP-N-acetylmuramoyl-L-alanyl-D-glutamate synthetase)	murD ASJ32_15120 GO994_02360	OTHER	Cytoplasmic	M	Cell wall formation. Catalyzes the addition of glutamate to the nucleotide precursor UDP-N-acetylmuramoyl-L-alanine (UMA)	Chromosome	23.6959	23.5439	23.5059	22.8761	25	25	25	72.4	72.4	72.4	45.657	0	238.05	363300000	264	A0A6N4CVP3	A0A6N4CVP3
A0A6N4CVP6	2,3-bisphosphoglycerate-independent phosphoglycerate mutase (BPG-independent PGAM) (Phosphoglyceromutase) (iPGM) (EC 5.4.2.12)	gpmI ASJ32_10825	OTHER	Cytoplasmic	G	Catalyzes the interconversion of 2-phosphoglycerate and 3-phosphoglycerate	Chromosome	27.81	28.0417	27.6251	27.4629	60	60	60	99.2	99.2	99.2	55.275	0	323.31	19744000000	5689	A0A6N4CVP6	A0A6N4CVP6
A0A6N4CVQ4	RNA-binding transcriptional accessory protein	ASJ32_10875	OTHER	Cytoplasmic	K	Tex-like protein N-terminal domain	Chromosome	25.7103	24.2521	25.0771	26.464	67	67	67	70.3	70.3	70.3	84.485	0	323.31	5442700000	1721	A0A6N4CVQ4	A0A6N4CVQ4
A0A6N4CVQ7	30S ribosomal protein S19	rpsS ASJ32_10925 GO994_01165	OTHER	Cytoplasmic	J	Protein S19 forms a complex with S13 that binds strongly to the 16S ribosomal RNA	Chromosome	30.6156	31.0571	31.0577	30.7625	18	18	18	92.4	92.4	92.4	10.44	0	279.49	36817000000	2874	A0A6N4CVQ7	A0A6N4CVQ7
A0A6N4CVQ8	Phosphoheptose isomerase	ASJ32_16500	OTHER	Cytoplasmic	G	SIS domain	Chromosome	24.819	24.592	23.5094	24.7319	8	8	8	53.6	53.6	53.6	20.869	0	282.29	670140000	275	A0A6N4CVQ8	A0A6N4CVQ8
A0A6N4CVR1	Cytochrome C	ASJ32_13700	SP(Sec/SPI)	Periplasmic	C	Cytochrome C oxidase, cbb3-type, subunit III	Chromosome	21.4755	21.4498	21.3564	21.9253	9	9	9	68.2	68.2	68.2	15.633	0	137.85	95552000	133	A0A6N4CVR1	A0A6N4CVR1
A0A6N4CVR6	Long-chain fatty acid outer membrane transporter	ASJ32_14520	SP(Sec/SPI)	OuterMembrane	I	Long-chain fatty acid	Chromosome	22.9838	21.5157	23.0451	23.7273	31	31	31	68.5	68.5	68.5	46.374	0	323.31	19799000000	6689	A0A6N4CVR6	A0A6N4CVR6
A0A6N4CVR7	PhnA domain protein	ASJ32_14465	OTHER	Unknown	P	Alkylphosphonate utilization operon protein PhnA	Chromosome	24.145	24.2047	23.7201	23.5065	9	9	9	56.2	56.2	56.2	20.611	0	187.97	402510000	184	A0A6N4CVR7	A0A6N4CVR7
A0A6N4CVR9	YicC family protein	ASJ32_13755 GO994_21415	OTHER	Cytoplasmic	S	Domain of unknown function (DUF1732)	Chromosome	27.0622	27.5522	27.1276	26.6705	46	46	46	80.5	80.5	80.5	32.881	0	323.31	6208100000	2024	A0A6N4CVR9	A0A6N4CVR9
A0A6N4CVS0	30S ribosomal protein S8	rpsH ASJ32_10975 GO994_01215	OTHER	Cytoplasmic	J	One of the primary rRNA binding proteins, it binds directly to 16S rRNA central domain where it helps coordinate assembly of the platform of the 30S subunit	Chromosome	30.2066	30.1816	31.6378	31.7066	29	29	29	100	100	100	14.001	0	323.31	84827000000	11698	A0A6N4CVS0	A0A6N4CVS0
A0A6N4CVS7	Cell division inhibitor MinD (Septum site-determining protein MinD)	minD ASJ32_14580 GO994_12500	OTHER	Cytoplasmic	D	Belongs to the ParA family	Chromosome	24.2859	24.1818	23.8943	25.394	40	40	40	79.6	79.6	79.6	29.604	0	323.31	10952000000	2167	A0A6N4CVS7	A0A6N4CVS7
A0A6N4CVT0	50S ribosomal protein L17	rplQ ASJ32_11025 GO994_01275	OTHER	Cytoplasmic	J	Ribosomal protein L17	Chromosome	30.4864	29.9773	31.2853	32.2512	33	33	33	96.9	96.9	96.9	14.316	0	323.31	133760000000	11429	A0A6N4CVT0	A0A6N4CVT0
A0A6N4CVT2	Chemotaxis protein CheY (Histidine kinase)	cheY ASJ32_14295 GO994_14345	OTHER	Cytoplasmic	T	cheY-homologous receiver domain	Chromosome	24.1906	23.4853	22.2502	22.4142	12	12	12	91.3	91.3	91.3	14.375	0	171.77	301570000	218	A0A6N4CVT2	A0A6N4CVT2
A0A6N4CVT5	Cell division topological specificity factor	minE ASJ32_14585 GO994_12505	OTHER	Cytoplasmic	D	Prevents the cell division inhibition by proteins MinC and MinD at internal division sites while permitting inhibition at polar sites. This ensures cell division at the proper site by restricting the formation of a division septum at the midpoint of the long axis of the cell	Chromosome	24.9043	24.011	NaN	24.0499	17	17	17	97.7	97.7	97.7	10.144	0	147.26	726370000	307	A0A6N4CVT5	A0A6N4CVT5
A0A6N4CVT7	Dihydroxy-acid dehydratase (DAD) (EC 4.2.1.9)	ilvD ASJ32_13865 GO994_21300	OTHER	Cytoplasmic	E	Belongs to the IlvD Edd family	Chromosome	28.0778	28.4209	28.0036	27.8035	65	65	65	77	77	77	65.115	0	323.31	23812000000	4691	A0A6N4CVT7	A0A6N4CVT7
A0A6N4CVT9	Oxidoreductase	ASJ32_09905 GO994_13960	OTHER	Cytoplasmic	S	Aldo/keto reductase family	Chromosome	24.3729	24.9443	25.1036	23.974	14	14	14	52.5	52.5	52.5	33.344	0	209.13	507330000	282	A0A6N4CVT9	A0A6N4CVT9
A0A6N4CVU5	FMN dependent NADH:quinone oxidoreductase (EC 1.6.5.-) (Azo-dye reductase) (FMN-dependent NADH-azo compound oxidoreductase) (FMN-dependent NADH-azoreductase) (EC 1.7.1.17)	azoR ASJ32_14635	OTHER	Cytoplasmic	C	Catalyzes the reductive cleavage of azo bond in aromatic azo compounds to the corresponding amines. Requires NADH, but not NADPH, as an electron donor for its activity	Chromosome	26.0198	26.2229	27.2679	25.7924	11	11	11	66.7	66.7	66.7	20.821	0	301.88	529990000	232	A0A6N4CVU5	A0A6N4CVU5
A0A6N4CVV0	Multifunctional CCA protein [Includes: CCA-adding enzyme (EC 2.7.7.72) (CCA tRNA nucleotidyltransferase) (tRNA CCA-pyrophosphorylase) (tRNA adenylyl-/cytidylyl-transferase) (tRNA nucleotidyltransferase) (tRNA-NT); 2'-nucleotidase (EC 3.1.3.-); 2',3'-cyclic phosphodiesterase (EC 3.1.4.-); Phosphatase]	cca ASJ32_15965 GO994_19580	OTHER	Cytoplasmic	J	Catalyzes the addition and repair of the essential 3'- terminal CCA sequence in tRNAs without using a nucleic acid template. Adds these three nucleotides in the order of C, C, and A to the tRNA nucleotide-73, using CTP and ATP as substrates and producing inorganic pyrophosphate. Also shows phosphatase, 2'- nucleotidase and 2',3'-cyclic phosphodiesterase activities. These phosphohydrolase activiti…	Chromosome	23.3679	23.2125	23.7466	23.3688	22	22	22	52.3	52.3	52.3	46.484	0	100.11	592060000	326	A0A6N4CVV0	A0A6N4CVV0
A0A6N4CVV1	Aminotransferase class I/II-fold pyridoxal phosphate-dependent enzyme (Aromatic amino acid aminotransferase) (EC 2.6.1.57)	ASJ32_03535 GO994_18920	OTHER	Cytoplasmic	E	Aminotransferase class I and II	Chromosome	26.7923	26.9813	27.0818	26.0297	35	35	35	74.6	74.6	74.6	43.598	0	323.31	5418500000	1937	A0A6N4CVV1	A0A6N4CVV1
A0A6N4CVV4	Peptide ABC transporter substrate-binding protein	ASJ32_15795	SP(Sec/SPI)	Periplasmic	E	Bacterial extracellular solute-binding proteins, family 5 Middle	Chromosome	24.2337	24.9304	24.7494	24.0119	43	43	43	80.9	80.9	80.9	59.911	0	323.31	1931300000	1174	A0A6N4CVV4	A0A6N4CVV4
A0A6N4CVW7	RNA-binding protein Hfq	hfq ASJ32_16030	OTHER	Cytoplasmic	S	RNA chaperone that binds small regulatory RNA (sRNAs) and mRNAs to facilitate mRNA translational regulation in response to envelope stress, environmental stress and changes in metabolite concentrations. Also binds with high specificity to tRNAs	Chromosome	28.0962	28.4098	28.1088	27.8515	13	13	13	94.1	94.1	94.1	13.022	0	323.31	5361600000	734	A0A6N4CVW7	A0A6N4CVW7
A0A6N4CVW8	Carbonate dehydratase	ASJ32_15900 GO994_03205	OTHER	Cytoplasmic	S	Bacterial transferase hexapeptide (six repeats)	Chromosome	23.9364	24.761	24.1563	23.9826	15	15	15	96.2	96.2	96.2	20.033	0	323.31	713670000	345	A0A6N4CVW8	A0A6N4CVW8
A0A6N4CVX4	Arginine ABC transporter ATP-binding protein	ASJ32_03690	OTHER	CytoplasmicMembrane	E	ABC transporter, ATP-binding protein	Chromosome	20.8976	20.903	21.7375	21.315	20	19	19	90.7	90.7	90.7	27.082	0	323.31	481060000	365	A0A6N4CVX4	A0A6N4CVX4
A0A6N4CVX7	Pyrimidine/purine nucleoside phosphorylase (EC 2.4.2.1) (EC 2.4.2.2) (Adenosine phosphorylase) (Cytidine phosphorylase) (Guanosine phosphorylase) (EC 2.4.2.15) (Inosine phosphorylase) (Thymidine phosphorylase) (EC 2.4.2.4) (Uridine phosphorylase) (EC 2.4.2.3) (Xanthosine phosphorylase)	ppnP ASJ32_14550	OTHER	Unknown	S	Catalyzes the phosphorolysis of diverse nucleosides, yielding D-ribose 1-phosphate and the respective free bases. Can use uridine, adenosine, guanosine, cytidine, thymidine, inosine and xanthosine as substrates. Also catalyzes the reverse reactions	Chromosome	25.9677	26.0899	25.6604	25.1786	9	9	9	61.7	61.7	61.7	10.461	0	257.47	1177800000	342	A0A6N4CVX7	A0A6N4CVX7
A0A6N4CVX8	Cell division protein FtsZ	ftsZ ASJ32_15090 GO994_02390	OTHER	Cytoplasmic	D	Essential cell division protein that forms a contractile ring structure (Z ring) at the future cell division site. The regulation of the ring assembly controls the timing and the location of cell division. One of the functions of the FtsZ ring is to recruit other cell division proteins to the septum to produce a new cell wall between the dividing cells. Binds GTP and shows GTPase activity	Chromosome	26.597	26.0956	26.1717	26.8045	48	48	48	98.4	98.4	98.4	40.324	0	323.31	21582000000	5958	A0A6N4CVX8	A0A6N4CVX8
A0A6N4CVY3	30S ribosomal protein S16	rpsP ASJ32_03745 GO994_18405	OTHER	Cytoplasmic	J	Belongs to the bacterial ribosomal protein bS16 family	Chromosome	27.2357	26.6132	26.4767	27.8937	15	15	15	95.1	95.1	95.1	8.9612	0	323.31	33885000000	3232	A0A6N4CVY3	A0A6N4CVY3
A0A6N4CVY8	Guanosine-5'-triphosphate,3'-diphosphate pyrophosphatase (EC 3.6.1.40) (Guanosine pentaphosphate phosphohydrolase) (pppGpp-5'-phosphohydrolase)	gppA ASJ32_15305	OTHER	Cytoplasmic	F	Catalyzes the conversion of pppGpp to ppGpp. Guanosine pentaphosphate (pppGpp) is a cytoplasmic signaling molecule which together with ppGpp controls the stringent response , an adaptive process that allows bacteria to respond to amino acid starvation, resulting in the coordinated regulation of numerous cellular activities	Chromosome	23.6587	22.9074	23.0527	20.5793	32	32	32	63.3	63.3	63.3	55.128	0	323.31	634830000	395	A0A6N4CVY8	A0A6N4CVY8
A0A6N4CVZ0	Exodeoxyribonuclease III (EC 3.1.11.2)	ASJ32_13495	OTHER	Cytoplasmic	L	Endonuclease/Exonuclease/phosphatase family	Chromosome	27.0325	27.2304	27.1971	26.5252	37	37	37	82.1	82.1	82.1	30.86	0	220.21	2789200000	973	A0A6N4CVZ0	A0A6N4CVZ0
A0A6N4CVZ5	Uncharacterized protein	ASJ32_03250 GO994_20645	OTHER	Cytoplasmic	-	-	Chromosome	28.2728	28.9242	28.8855	27.7688	17	17	17	65.7	65.7	65.7	19.635	0	323.31	5315600000	1122	A0A6N4CVZ5;REV__A0A6N4CUX4	A0A6N4CVZ5
A0A6N4CW05	S-ribosylhomocysteine lyase (EC 4.4.1.21) (AI-2 synthesis protein) (Autoinducer-2 production protein LuxS)	luxS ASJ32_03900 GO994_18240	OTHER	Cytoplasmic	H	Involved in the synthesis of autoinducer 2 (AI-2) which is secreted by bacteria and is used to communicate both the cell density and the metabolic potential of the environment. The regulation of gene expression in response to changes in cell density is called quorum sensing. Catalyzes the transformation of S-ribosylhomocysteine (RHC) to homocysteine (HC) and 4,5- dihydroxy-2,3-pentadione (DPD)	Chromosome	26.4211	26.1941	25.3039	26.2175	17	17	17	91.7	91.7	91.7	18.791	0	323.31	5194000000	1549	A0A6N4CW05	A0A6N4CW05
A0A6N4CW11	MerR family transcriptional regulator	ASJ32_14540 GO994_12460	OTHER	Cytoplasmic	K	helix_turn_helix, mercury resistance	Chromosome	22.6448	22.8385	23.7315	23.0875	12	12	12	67.4	67.4	67.4	16.028	0	172.35	231210000	165	A0A6N4CW11	A0A6N4CW11
A0A6N4CW15	Transporter	ASJ32_13585	SP(Sec/SPI)	Unknown	M	DUF218 domain	Chromosome	25.6353	25.7079	26.5617	26.1857	34	34	34	68.4	68.4	68.4	40.714	0	323.31	2056700000	746	A0A6N4CW15	A0A6N4CW15
A0A6N4CW16	30S ribosomal protein S18	rpsR ASJ32_03955 GO994_18185	OTHER	Cytoplasmic	J	Binds as a heterodimer with protein S6 to the central domain of the 16S rRNA, where it helps stabilize the platform of the 30S subunit	Chromosome	28.2748	28.2086	28.1971	29.1162	11	11	11	76.3	76.3	76.3	9.0855	0	323.31	17822000000	6126	A0A6N4CW16	A0A6N4CW16
A0A6N4CW26	DUF4432 family protein (Thioredoxin)	ASJ32_04005 GO994_18130	SP(Sec/SPI)	Unknown	G	Domain of unknown function (DUF4432)	Chromosome	23.3596	23.6716	23.6096	NaN	9	9	9	22	22	22	44.453	0	144.06	105420000	47	A0A6N4CW26	A0A6N4CW26
A0A6N4CW34	Uncharacterized protein	ASJ32_03455	SP(Sec/SPI)	CytoplasmicMembrane	S	Glycosyl hydrolases related to GH101 family, GH129	Chromosome	22.7661	23.6685	24.6229	23.5443	33	33	33	52.7	52.7	52.7	80.935	0	323.31	377690000	330	A0A6N4CW34	A0A6N4CW34
A0A6N4CW35	Peptide chain release factor 3 (RF-3)	prfC ASJ32_04060	OTHER	Cytoplasmic	J	Increases the formation of ribosomal termination complexes and stimulates activities of RF-1 and RF-2. It binds guanine nucleotides and has strong preference for UGA stop codons. It may interact directly with the ribosome. The stimulation of RF- 1 and RF-2 is significantly reduced by GTP and GDP, but not by GMP	Chromosome	25.6705	25.3723	24.9894	23.7897	50	50	50	67.6	67.6	67.6	59.348	0	323.31	1837500000	1021	A0A6N4CW35	A0A6N4CW35
A0A6N4CW37	Uncharacterized protein	ASJ32_14410	SP(Sec/SPI)	Unknown	O	Metallo-peptidase family M12B Reprolysin-like	Chromosome	23.3142	23.0196	24.4447	24.998	35	35	35	66.9	66.9	66.9	67.575	0	323.31	3951300000	1165	A0A6N4CW37	A0A6N4CW37
A0A6N4CW39	Anti-sigma factor (Rsd/AlgQ family anti-sigma factor)	ASJ32_15700 GO994_18595	OTHER	Cytoplasmic	K	Belongs to the Rsd AlgQ family	Chromosome	22.3878	21.8911	NaN	19.8238	9	9	9	38.1	38.1	38.1	18.376	0	63.98	397180000	153	A0A6N4CW39	A0A6N4CW39
A0A6N4CW41	DUF2987 domain-containing protein	ASJ32_13080 GO994_10615	SP(Sec/SPI)	Unknown	S	Protein of unknown function (DUF2987)	Chromosome	22.9862	23.0497	23.5547	22.7176	13	13	13	61.9	61.9	61.9	24.557	0	175.24	226170000	200	A0A6N4CW41	A0A6N4CW41
A0A6N4CW51	UPF0246 protein ASJ32_15750	yaaA ASJ32_15750 GO994_18655	OTHER	Cytoplasmic	S	Belongs to the UPF0246 family	Chromosome	25.5502	25.8229	25.8679	25.4899	18	18	18	60.3	60.3	60.3	29.2	0	316.96	2245600000	681	A0A6N4CW51	A0A6N4CW51
A0A6N4CW55	Aconitate hydratase B (EC 4.2.1.3) (EC 4.2.1.99) (2-methylisocitrate dehydratase)	ASJ32_14970	OTHER	Cytoplasmic	C	Belongs to the aconitase IPM isomerase family	Chromosome	28.6986	28.782	28.836	28.3434	102	102	102	86.5	86.5	86.5	93.098	0	323.31	24099000000	6120	A0A6N4CW55	A0A6N4CW55
A0A6N4CW58	HlyD_D23 domain-containing protein	ASJ32_09485	OTHER	CytoplasmicMembrane	M	Belongs to the membrane fusion protein (MFP) (TC 8.A.1) family	Chromosome	21.8615	22.2894	22.3349	22.9473	43	43	43	67.1	67.1	67.1	40.225	0	323.31	33885000000	6441	A0A6N4CW58	A0A6N4CW58
A0A6N4CW67	Valine--pyruvate aminotransferase (EC 2.6.1.66)	avtA ASJ32_09545	OTHER	Cytoplasmic	E	Aminotransferase class I and II	Chromosome	24.8387	24.1355	23.0051	23.1603	28	28	28	57.3	57.3	57.3	46.137	0	323.31	916640000	456	A0A6N4CW67	A0A6N4CW67
A0A6N4CW71	Orotate phosphoribosyltransferase (OPRT) (OPRTase) (EC 2.4.2.10)	pyrE ASJ32_13765 GO994_21405	OTHER	Cytoplasmic	F	Catalyzes the transfer of a ribosyl phosphate group from 5-phosphoribose 1-diphosphate to orotate, leading to the formation of orotidine monophosphate (OMP)	Chromosome	23.1199	23.4548	21.4204	21.1854	19	19	19	70	70	70	23.803	0	323.31	517150000	357	A0A6N4CW71	A0A6N4CW71
A0A6N4CW72	Arginine repressor	argR ASJ32_03685 GO994_18465	OTHER	Cytoplasmic	K	Regulates arginine biosynthesis genes	Chromosome	25.6655	26.192	26.4741	26.281	9	9	9	60.3	60.3	60.3	17.073	0	323.31	1193800000	218	A0A6N4CW72	A0A6N4CW72
A0A6N4CW79	Ribonuclease	ASJ32_15905	SP(Sec/SPI)	Periplasmic	J	Belongs to the RNase T2 family	Chromosome	23.802	24.5359	24.8353	24.2173	18	18	18	69.4	69.4	69.4	24.46	0	323.31	433440000	382	A0A6N4CW79	A0A6N4CW79
A0A6N4CW80	Pyruvate kinase (EC 2.7.1.40)	ASJ32_14125	OTHER	Cytoplasmic	G	Belongs to the pyruvate kinase family	Chromosome	28.0015	28.0178	27.9687	27.812	56	56	56	87.3	87.3	87.3	51.531	0	323.31	12669000000	3517	A0A6N4CW80	A0A6N4CW80
A0A6N4CW81	Nicotinate phosphoribosyltransferase (NAPRTase) (EC 6.3.4.21)	pncB ASJ32_13820	OTHER	Cytoplasmic	H	Catalyzes the synthesis of beta-nicotinate D- ribonucleotide from nicotinate and 5-phospho-D-ribose 1-phosphate at the expense of ATP	Chromosome	20.0996	21.1895	NaN	20.9383	24	24	24	60.2	60.2	60.2	44.927	0	161.79	138180000	118	A0A6N4CW81	A0A6N4CW81
A0A6N4CW82	Signal recognition particle protein (Fifty-four homolog)	ffh ASJ32_03740	OTHER	CytoplasmicMembrane	U	Involved in targeting and insertion of nascent membrane proteins into the cytoplasmic membrane. Binds to the hydrophobic signal sequence of the ribosome-nascent chain (RNC) as it emerges from the ribosomes. The SRP-RNC complex is then targeted to the cytoplasmic membrane where it interacts with the SRP receptor FtsY. Interaction with FtsY leads to the transfer of the RNC complex to the Sec transl…	Chromosome	22.2523	21.7134	22.2477	23.6058	48	48	48	71	71	71	49.973	0	323.31	5289000000	1566	A0A6N4CW82	A0A6N4CW82
A0A6N4CW83	UDP-N-acetylmuramoyl-tripeptide--D-alanyl-D-alanine ligase (EC 6.3.2.10) (D-alanyl-D-alanine-adding enzyme)	murF ASJ32_15130 GO994_02350	OTHER	Cytoplasmic	M	Involved in cell wall formation. Catalyzes the final step in the synthesis of UDP-N-acetylmuramoyl-pentapeptide, the precursor of murein	Chromosome	22.9357	22.6447	22.8341	23.3697	26	26	26	59.4	59.4	59.4	47.759	0	323.31	1585200000	706	A0A6N4CW83	A0A6N4CW83
A0A6N4CW85	Ornithine carbamoyltransferase (EC 2.1.3.3)	ASJ32_03320	OTHER	Cytoplasmic	E	ornithine carbamoyltransferase	Chromosome	22.1084	22.8971	22.4746	21.9726	15	15	15	45.2	45.2	45.2	33.029	0	109.68	259280000	240	A0A6N4CW85	A0A6N4CW85
A0A6N4CW86	Histidine biosynthesis bifunctional protein HisIE [Includes: Phosphoribosyl-AMP cyclohydrolase (PRA-CH) (EC 3.5.4.19); Phosphoribosyl-ATP pyrophosphatase (PRA-PH) (EC 3.6.1.31)]	hisI hisIE ASJ32_12530 GO994_11920	OTHER	Cytoplasmic	E	Belongs to the PRA-CH family	Chromosome	25.0157	25.3674	25.3689	24.9273	15	15	15	57.8	57.8	57.8	23.046	0	323.31	1925200000	844	A0A6N4CW86	A0A6N4CW86
A0A6N4CW88	Putative histamine N-monooxygenase (Rhizobactin siderophore biosynthesis protein RhbE)	basC ASJ32_09660 GO994_22185	OTHER	Cytoplasmic	Q	l-lysine 6-monooxygenase	Chromosome	24.1827	24.7217	23.8402	24.0362	40	40	40	62.7	62.7	62.7	49.683	0	323.31	10586000000	1935	A0A6N4CW88	A0A6N4CW88
A0A6N4CW95	ATP phosphoribosyltransferase (ATP-PRT) (ATP-PRTase) (EC 2.4.2.17)	hisG ASJ32_12580 GO994_11870	OTHER	Cytoplasmic	F	Catalyzes the condensation of ATP and 5-phosphoribose 1- diphosphate to form N'-(5'-phosphoribosyl)-ATP (PR-ATP). Has a crucial role in the pathway because the rate of histidine biosynthesis seems to be controlled primarily by regulation of HisG enzymatic activity	Chromosome	27.6382	27.6682	27.06	27.8269	42	42	42	84.2	84.2	84.2	32.595	0	323.31	15523000000	3596	A0A6N4CW95	A0A6N4CW95
A0A6N4CW98	4-hydroxy-3-methylbut-2-enyl diphosphate reductase (HMBPP reductase) (EC 1.17.7.4)	ispH lytB ASJ32_03845 GO994_18295	OTHER	Cytoplasmic	IM	Catalyzes the conversion of 1-hydroxy-2-methyl-2-(E)- butenyl 4-diphosphate (HMBPP) into a mixture of isopentenyl diphosphate (IPP) and dimethylallyl diphosphate (DMAPP). Acts in the terminal step of the DOXP MEP pathway for isoprenoid precursor biosynthesis	Chromosome	23.1131	23.0307	23.1948	23.1598	26	26	26	90.4	90.4	90.4	34.111	0	323.31	920110000	549	A0A6N4CW98	A0A6N4CW98
A0A6N4CWA1	tRNA/tmRNA (uracil-C(5))-methyltransferase (EC 2.1.1.35) (tRNA (uracil(54)-C(5))-methyltransferase) (tRNA(m5U54)-methyltransferase) (RUMT) (tmRNA (uracil(341)-C(5))-methyltransferase)	trmA ASJ32_13930 GO994_21235	OTHER	Cytoplasmic	J	Dual-specificity methyltransferase that catalyzes the formation of 5-methyluridine at position 54 (m5U54) in all tRNAs, and that of position 341 (m5U341) in tmRNA (transfer-mRNA)	Chromosome	24.3139	24.7699	23.9376	23.7919	23	23	23	70.8	70.8	70.8	42.702	0	323.31	629740000	431	A0A6N4CWA1	A0A6N4CWA1
A0A6N4CWA2	Argininosuccinate synthase (EC 6.3.4.5) (Citrulline--aspartate ligase)	argG ASJ32_03325	OTHER	Cytoplasmic	E	Belongs to the argininosuccinate synthase family. Type	Chromosome	25.8331	26.0759	25.9556	25.7639	50	50	50	81.8	81.8	81.8	45.2	0	323.31	12217000000	3253	A0A6N4CWA2	A0A6N4CWA2
A0A6N4CWA5	Flagella-associated GTP-binding protein (Flagellar biosynthesis protein FlhF)	flhF ASJ32_14280 GO994_14360	OTHER	Cytoplasmic	N	SRP54-type protein, GTPase domain	Chromosome	23.3281	23.0891	24.5417	24.1993	38	38	38	64.4	64.4	64.4	51.715	0	323.31	1250500000	602	A0A6N4CWA5	A0A6N4CWA5
A0A6N4CWB0	Pseudaminic acid synthase	ASJ32_13985	OTHER	Unknown	M	NeuB family	Chromosome	21.9189	22.5502	22.0179	21.8798	8	8	8	31	31	31	37.635	0	163.65	60017000	57	A0A6N4CWB0	A0A6N4CWB0
A0A6N4CWB2	Maltose acetyltransferase	ASJ32_03375	OTHER	Cytoplasmic	S	Maltose acetyltransferase	Chromosome	23.2086	23.4651	23.1046	22.7543	11	11	11	74.5	74.5	74.5	21.085	0	109.73	190110000	135	A0A6N4CWB2	A0A6N4CWB2
A0A6N4CWB7	30S ribosomal protein S6	rpsF ASJ32_03950 GO994_18190	OTHER	Cytoplasmic	J	Binds together with S18 to 16S ribosomal RNA	Chromosome	29.4502	29.3507	29.9505	31.2537	26	26	26	100	100	100	15.077	0	323.31	75140000000	7927	A0A6N4CWB7	A0A6N4CWB7
A0A6N4CWC4	GntR family transcriptional regulator (UTRA domain-containing protein)	ASJ32_15410 GO994_21745	OTHER	Cytoplasmic	K	UTRA domain	Chromosome	21.0812	20.7131	21.4672	22.2074	24	24	24	82.1	82.1	82.1	26.695	0	99.921	610090000	307	A0A6N4CWC4	A0A6N4CWC4
A0A6N4CWC6	Uridine kinase (EC 2.7.1.48) (Cytidine monophosphokinase) (Uridine monophosphokinase)	udk ASJ32_12740	OTHER	Cytoplasmic	F	Cytidine monophosphokinase	Chromosome	24.5023	25.6447	25.0173	24.371	22	22	22	75.2	75.2	75.2	24.253	0	323.31	2182900000	1048	A0A6N4CWC6	A0A6N4CWC6
A0A6N4CWD5	Copper resistance protein (Thioredoxin domain-containing protein)	ASJ32_03135 GO994_20530	SP(Sec/SPI)	Unknown	O	DSBA-like thioredoxin domain	Chromosome	24.5065	24.3579	25.0127	24.7803	20	20	20	83.5	83.5	83.5	26.469	0	323.31	708040000	371	A0A6N4CWD5	A0A6N4CWD5
A0A6N4CWE1	DNAse	ASJ32_12840	OTHER	Cytoplasmic	L	TatD related DNase	Chromosome	23.3407	23.7315	22.2142	22.1479	16	16	16	54.8	54.8	54.8	28.712	0	281.34	316620000	272	A0A6N4CWE1	A0A6N4CWE1
A0A6N4CWE5	Uncharacterized protein	ASJ32_12900 GO994_11540	OTHER	Cytoplasmic	S	Tetratricopeptide repeat	Chromosome	26.4675	26.2546	24.6779	25.8624	10	10	10	54.1	54.1	54.1	28.975	0	224.86	280030000	134	A0A6N4CWE5	A0A6N4CWE5
A0A6N4CWE6	D-2-hydroxyacid dehydrogenase (Hydroxyacid dehydrogenase)	ASJ32_03235 GO994_20630	OTHER	Cytoplasmic	EH	D-isomer specific 2-hydroxyacid dehydrogenase	Chromosome	23.8554	23.9983	23.4544	21.4248	21	21	21	53.8	53.8	53.8	35.251	0	323.31	955550000	547	A0A6N4CWE6	A0A6N4CWE6
A0A6N4CWF5	Transcriptional regulator	nhaR ASJ32_03805	OTHER	Cytoplasmic	K	transcriptional activator	Chromosome	22.6195	22.7809	22.8579	22.5472	15	15	15	49.4	49.4	49.4	35.18	0	90.313	96398000	149	A0A6N4CWF5	A0A6N4CWF5
A0A6N4CWF9	3-deoxy-manno-octulosonate cytidylyltransferase (EC 2.7.7.38) (CMP-2-keto-3-deoxyoctulosonic acid synthase) (CKS) (CMP-KDO synthase)	kdsB ASJ32_12085	OTHER	Cytoplasmic	M	Activates KDO (a required 8-carbon sugar) for incorporation into bacterial lipopolysaccharide in Gram-negative bacteria	Chromosome	22.8295	23.6437	23.9359	23.4002	13	13	13	65.3	65.3	65.3	28.34	0	110.87	260980000	154	A0A6N4CWF9	A0A6N4CWF9
A0A6N4CWG4	50S ribosomal protein L19	rplS ASJ32_03760 GO994_18390	OTHER	Cytoplasmic	J	This protein is located at the 30S-50S ribosomal subunit interface and may play a role in the structure and function of the aminoacyl-tRNA binding site	Chromosome	30.5621	30.5834	29.7928	30.6809	27	27	27	87	87	87	13.164	0	323.31	73831000000	9891	A0A6N4CWG4	A0A6N4CWG4
A0A6N4CWG5	Cell division coordinator CpoB	cpoB ASJ32_04155	SP(Sec/SPI)	Unknown	D	Mediates coordination of peptidoglycan synthesis and outer membrane constriction during cell division	Chromosome	25.2132	25.1065	26.2168	25.9525	24	24	24	63.5	63.5	63.5	28.575	0	323.31	1024900000	423	A0A6N4CWG5	A0A6N4CWG5
A0A6N4CWG7	Porin	ASJ32_12135 GO994_14700	SP(Sec/SPI)	OuterMembrane	M	Belongs to the Gram-negative porin family	Chromosome	26.952	26.7863	26.5646	27.7734	43	43	43	85.8	85.8	85.8	38.455	0	323.31	228990000000	42250	A0A6N4CWG7	A0A6N4CWG7
A0A6N4CWH3	GTPase Der (GTP-binding protein EngA)	der ASJ32_01895	OTHER	Cytoplasmic	S	GTPase that plays an essential role in the late steps of ribosome biogenesis	Chromosome	24.7228	22.7456	22.8224	25.4709	57	57	57	72.5	72.5	72.5	55.593	0	323.31	9019000000	2875	A0A6N4CWH3	A0A6N4CWH3
A0A6N4CWH6	Ferredoxin--NADP(+) reductase (Ferredoxin-NADP reductase)	ASJ32_03965 GO994_18175	OTHER	Cytoplasmic	C	Oxidoreductase NAD-binding domain	Chromosome	22.6481	23.5422	22.2022	NaN	20	20	20	60.7	60.7	60.7	27.147	0	176.93	371140000	153	A0A6N4CWH6	A0A6N4CWH6
A0A6N4CWI1	Glutamate dehydrogenase (EC 1.4.1.2)	ASJ32_12990	OTHER	Unknown	E	Bacterial NAD-glutamate dehydrogenase	Chromosome	25.3438	25.4842	26.4176	25.7651	134	134	134	72.3	72.3	72.3	181.2	0	323.31	12391000000	4644	A0A6N4CWI1	A0A6N4CWI1
A0A6N4CWI4	Extracellular solute-binding protein (Sugar ABC transporter substrate-binding protein)	ASJ32_15510 GO994_21605	SP(Sec/SPI)	Periplasmic	G	Bacterial extracellular solute-binding protein	Chromosome	22.2942	22.9624	NaN	22.5244	10	10	10	38.3	38.3	38.3	45.941	0	73.448	29398000	32	A0A6N4CWI4	A0A6N4CWI4
A0A6N4CWI7	Aminopeptidase (EC 3.4.11.23)	ASJ32_01945	OTHER	Cytoplasmic	E	Probably plays an important role in intracellular peptide degradation	Chromosome	25.4957	25.9768	27.1735	25.4562	41	41	39	85.6	85.6	82.6	41.87	0	323.31	4872100000	1518	A0A6N4CWI7	A0A6N4CWI7
A0A6N4CWI9	Ribonuclease PH (RNase PH) (EC 2.7.7.56) (tRNA nucleotidyltransferase)	rph ASJ32_13760	OTHER	Cytoplasmic	J	Phosphorolytic exoribonuclease that removes nucleotide residues following the -CCA terminus of tRNA and adds nucleotides to the ends of RNA molecules by using nucleoside diphosphates as substrates	Chromosome	27.0465	27.4715	28.2909	27.7517	19	19	19	75.4	75.4	75.4	25.844	0	323.31	3458000000	1435	A0A6N4CWI9	A0A6N4CWI9
A0A6N4CWJ2	Metal-binding protein	ASJ32_12310	OTHER	Cytoplasmic	S	NIF3 (NGG1p interacting factor 3)	Chromosome	24.7177	25.2645	24.5846	25.9399	16	16	16	67.6	67.6	67.6	27.809	0	191.42	2153700000	656	A0A6N4CWJ2	A0A6N4CWJ2
A0A6N4CWJ9	Glutathione S-transferase	ASJ32_13090 GO994_10605	OTHER	Cytoplasmic	H	Glutathione S-transferase, C-terminal domain	Chromosome	23.7385	23.2418	23.1921	22.9933	18	18	18	86.3	86.3	86.3	22.494	0	323.31	816860000	419	A0A6N4CWJ9	A0A6N4CWJ9
A0A6N4CWK5	Anti-sigma-28 factor (Negative regulator of flagellin synthesis)	flgM ASJ32_12425 GO994_14945	OTHER	Unknown	N	Anti-sigma-28 factor, FlgM	Chromosome	22.6414	22.6565	24.1473	23.2507	13	13	13	99.1	99.1	99.1	11.39	0	323.31	158420000	170	A0A6N4CWK5	A0A6N4CWK5
A0A6N4CWK7	Phosphonate ABC transporter substrate-binding protein	ASJ32_13815	SP(Sec/SPI)	Periplasmic	P	ABC transporter, phosphonate, periplasmic substrate-binding protein	Chromosome	25.0758	25.5921	25.1958	24.6257	28	28	28	76.9	76.9	76.9	30.515	0	323.31	1149800000	604	A0A6N4CWK7	A0A6N4CWK7
A0A6N4CWL0	Quinolinate phosphoribosyltransferase [decarboxylating] (EC 2.4.2.19)	nadC ASJ32_15030 GO994_02455	OTHER	Cytoplasmic	H	Belongs to the NadC ModD family	Chromosome	24.5006	24.8011	25.4164	24.7394	24	24	24	72.6	72.6	72.6	30.802	0	165.62	870690000	325	A0A6N4CWL0	A0A6N4CWL0
A0A6N4CWL4	DNA gyrase subunit A (EC 5.6.2.2)	gyrA ASJ32_13200 GO994_10495	OTHER	Cytoplasmic	L	A type II topoisomerase that negatively supercoils closed circular double-stranded (ds) DNA in an ATP-dependent manner to modulate DNA topology and maintain chromosomes in an underwound state. Negative supercoiling favors strand separation, and DNA replication, transcription, recombination and repair, all of which involve strand separation. Also able to catalyze the interconversion of other topol…	Chromosome	28.1936	28.4385	28.5903	28.6085	121	121	121	78.2	78.2	78.2	102.38	0	323.31	31311000000	6710	A0A6N4CWL4	A0A6N4CWL4
A0A6N4CWL5	Alkene reductase	ASJ32_04075	OTHER	Cytoplasmic	C	COG1902 NADH flavin oxidoreductases, Old Yellow Enzyme family	Chromosome	22.5557	22.8094	22.8303	21.8503	18	18	18	55.9	55.9	55.9	37.863	0	323.31	227600000	228	A0A6N4CWL5	A0A6N4CWL5
A0A6N4CWL6	Alkyl hydroperoxide reductase C (EC 1.11.1.26) (Peroxiredoxin) (Thioredoxin peroxidase)	ASJ32_02050	OTHER	Cytoplasmic	O	Alkyl hydroperoxide reductase	Chromosome	29.7841	30.2987	30.7911	29.9338	37	37	37	99.5	99.5	99.5	20.788	0	323.31	66096000000	8428	A0A6N4CWL6	A0A6N4CWL6
A0A6N4CWL7	Isoleucine--tRNA ligase (EC 6.1.1.5) (Isoleucyl-tRNA synthetase) (IleRS)	ileS ASJ32_03830 GO994_18310	OTHER	Cytoplasmic	J	amino acids such as valine, to avoid such errors it has two additional distinct tRNA(Ile)-dependent editing activities. One activity is designated as 'pretransfer' editing and involves the hydrolysis of activated Val-AMP. The other activity is designated 'posttransfer' editing and involves deacylation of mischarged Val-tRNA(Ile)	Chromosome	26.8831	26.9184	26.411	26.6585	101	101	101	79.5	79.5	79.5	106.24	0	323.31	24411000000	7073	A0A6N4CWL7	A0A6N4CWL7
A0A6N4CWL8	L-threonine dehydratase (EC 4.3.1.19) (Threonine deaminase)	ilvA ASJ32_13870	OTHER	Cytoplasmic	E	Catalyzes the anaerobic formation of alpha-ketobutyrate and ammonia from threonine in a two-step reaction. The first step involved a dehydration of threonine and a production of enamine intermediates (aminocrotonate), which tautomerizes to its imine form (iminobutyrate). Both intermediates are unstable and short- lived. The second step is the nonenzymatic hydrolysis of the enamine imine intermedi…	Chromosome	24.272	24.8237	25.0705	24.4981	58	58	58	87.9	87.9	87.9	55.488	0	323.31	3349200000	1664	A0A6N4CWL8	A0A6N4CWL8
A0A6N4CWM4	Acyl-CoA thioesterase	ASJ32_04125	OTHER	Cytoplasmic	S	Thioesterase-like superfamily	Chromosome	21.9571	21.6329	22.5768	NaN	11	11	11	54.8	54.8	54.8	15.1	0	233.21	84600000	60	A0A6N4CWM4	A0A6N4CWM4
A0A6N4CWM8	Cell division protein ZapA (Z ring-associated protein ZapA)	zapA ASJ32_02100 GO994_10070	OTHER	Unknown	D	Activator of cell division through the inhibition of FtsZ GTPase activity, therefore promoting FtsZ assembly into bundles of protofilaments necessary for the formation of the division Z ring. It is recruited early at mid-cell but it is not essential for cell division	Chromosome	23.3631	23.0497	22.7661	22.8715	9	9	9	67.3	67.3	67.3	12.474	0	93.913	135680000	135	A0A6N4CWM8	A0A6N4CWM8
A0A6N4CWN0	UDP-N-acetylmuramoyl-L-alanyl-D-glutamate--2,6-diaminopimelate ligase (EC 6.3.2.13) (Meso-A2pm-adding enzyme) (Meso-diaminopimelate-adding enzyme) (UDP-MurNAc-L-Ala-D-Glu:meso-diaminopimelate ligase) (UDP-MurNAc-tripeptide synthetase) (UDP-N-acetylmuramyl-tripeptide synthetase)	murE ASJ32_15135 GO994_02345	OTHER	CytoplasmicMembrane	M	Catalyzes the addition of meso-diaminopimelic acid to the nucleotide precursor UDP-N-acetylmuramoyl-L-alanyl-D-glutamate (UMAG) in the biosynthesis of bacterial cell-wall peptidoglycan	Chromosome	23.7299	24.211	NaN	21.8543	19	19	19	51.6	51.6	51.6	52.837	0	323.31	498680000	272	A0A6N4CWN0	A0A6N4CWN0
A0A6N4CWP3	Quinone oxidoreductase (Zinc-binding dehydrogenase)	ASJ32_03985 GO994_18150	OTHER	Cytoplasmic	C	Zinc-binding dehydrogenase	Chromosome	23.39	24.1691	24.1361	23.2548	14	14	14	34.3	34.3	34.3	34.198	0	98.195	520300000	300	A0A6N4CWP3	A0A6N4CWP3
A0A6N4CWP9	ATP-dependent helicase	ASJ32_12590	OTHER	Cytoplasmic	KL	HELICc2	Chromosome	22.0791	NaN	21.3008	22.5607	32	32	32	59	59	59	70.069	0	147.19	259920000	220	A0A6N4CWP9	A0A6N4CWP9
A0A6N4CWQ6	DNA-directed DNA polymerase (EC 2.7.7.7)	ASJ32_12645	OTHER	Cytoplasmic	L	DNA polymerase III is a complex, multichain enzyme responsible for most of the replicative synthesis in bacteria. This DNA polymerase also exhibits 3' to 5' exonuclease activity	Chromosome	21.4342	21.0411	22.1949	23.4963	41	41	41	43.8	43.8	43.8	92.964	0	323.31	2633300000	1345	A0A6N4CWQ6	A0A6N4CWQ6
A0A6N4CWQ7	Pyridoxine/pyridoxamine 5'-phosphate oxidase (EC 1.4.3.5) (PNP/PMP oxidase) (PNPOx) (Pyridoxal 5'-phosphate synthase)	pdxH ASJ32_14420 GO994_07785	OTHER	Cytoplasmic	H	Catalyzes the oxidation of either pyridoxine 5'- phosphate (PNP) or pyridoxamine 5'-phosphate (PMP) into pyridoxal 5'-phosphate (PLP)	Chromosome	24.0537	24.0623	23.6622	NaN	22	22	22	86.8	86.8	86.8	24.474	0	211.35	383740000	263	A0A6N4CWQ7	A0A6N4CWQ7
A0A6N4CWR0	ATP--cob(I)alamin adenosyltransferase (Cobalamin adenosyltransferase)	ASJ32_13940 GO994_21225	OTHER	Cytoplasmic	S	Adenosyltransferase	Chromosome	24.3786	25.2912	NaN	24.5846	8	8	8	38	38	38	20.744	0	71.77	283220000	72	A0A6N4CWR0	A0A6N4CWR0
A0A6N4CWR9	Formate-dependent phosphoribosylglycinamide formyltransferase (5'-phosphoribosylglycinamide transformylase 2) (Formate-dependent GAR transformylase) (EC 2.1.2.-) (GAR transformylase 2) (GART 2) (Non-folate glycinamide ribonucleotide transformylase) (Phosphoribosylglycinamide formyltransferase 2)	purT ASJ32_14645	OTHER	CytoplasmicMembrane	F	Involved in the de novo purine biosynthesis. Catalyzes the transfer of formate to 5-phospho-ribosyl-glycinamide (GAR), producing 5-phospho-ribosyl-N-formylglycinamide (FGAR). Formate is provided by PurU via hydrolysis of 10-formyl-tetrahydrofolate	Chromosome	26.7823	26.9634	26.1822	26.7272	38	38	38	82.9	82.9	82.9	42.171	0	323.31	5649700000	1582	A0A6N4CWR9	A0A6N4CWR9
A0A6N4CWS1	Pseudaminic acid cytidylyltransferase	ASJ32_13995	OTHER	Cytoplasmic	M	Cytidylyltransferase	Chromosome	22.2372	22.6571	22.9005	22.4806	14	14	14	63.2	63.2	63.2	25.258	0	210.32	101790000	101	A0A6N4CWS1	A0A6N4CWS1
A0A6N4CWS3	Diguanylate cyclase	ASJ32_11830	OTHER	Cytoplasmic	T	diguanylate cyclase	Chromosome	22.7017	21.8015	21.8243	21.6548	24	24	24	67.2	67.2	67.2	47.369	0	323.31	608180000	407	A0A6N4CWS3	A0A6N4CWS3
A0A6N4CWS8	Non-specific serine/threonine protein kinase (EC 2.7.11.1)	ASJ32_14710 GO994_12645	OTHER	Cytoplasmic	DT	Serine threonine protein kinase involved in cell cycle control	Chromosome	25.0423	24.3742	23.9431	24.8295	20	20	20	62.6	62.6	62.6	32.136	0	323.31	1248800000	649	A0A6N4CWS8	A0A6N4CWS8
A0A6N4CWT2	Sulfur acceptor protein CsdL (tRNA cyclic N6-threonylcarbamoyladenosine(37) synthase TcdA)	tcdA ASJ32_13675 GO994_21530	TAT(Tat/SPI)	Cytoplasmic	H	ThiF family	Chromosome	21.4976	21.8656	NaN	23.0861	24	24	24	84.9	84.9	84.9	29.751	0	297.05	1109700000	536	A0A6N4CWT2	A0A6N4CWT2
A0A6N4CWT6	Malonyl CoA-acyl carrier protein transacylase (EC 2.3.1.39)	ASJ32_12800	OTHER	Cytoplasmic	I	Acyl transferase domain	Chromosome	25.1259	25.3304	24.974	24.8931	33	33	33	100	100	100	32.517	0	323.31	5196000000	1600	A0A6N4CWT6	A0A6N4CWT6
A0A6N4CWU3	GMP synthase [glutamine-hydrolyzing] (EC 6.3.5.2) (GMP synthetase) (Glutamine amidotransferase)	guaA ASJ32_11045 GO994_08570	OTHER	Cytoplasmic	F	Catalyzes the synthesis of GMP from XMP	Chromosome	28.7675	29.356	28.5002	27.8351	63	63	63	93.9	93.9	93.9	58.494	0	323.31	23349000000	4803	A0A6N4CWU3	A0A6N4CWU3
A0A6N4CWU6	Pyrophosphate phospho-hydrolase (EC 3.6.1.1)	ASJ32_13355 GO994_16255	OTHER	Cytoplasmic	C	DHHA2	Chromosome	22.4595	22.795	21.8716	NaN	12	12	12	50.5	50.5	50.5	32.033	0	323.31	151600000	95	A0A6N4CWU6	A0A6N4CWU6
A0A6N4CWV1	DNA repair protein RecN (Recombination protein N)	ASJ32_13360	OTHER	Cytoplasmic	L	May be involved in recombinational repair of damaged DNA	Chromosome	22.4398	NaN	21.9579	23.5577	31	31	31	65.7	65.7	65.7	61.1	0	323.31	446540000	371	A0A6N4CWV1	A0A6N4CWV1
A0A6N4CWV3	3-phosphoshikimate 1-carboxyvinyltransferase (EC 2.5.1.19) (5-enolpyruvylshikimate-3-phosphate synthase) (EPSP synthase) (EPSPS)	aroA ASJ32_11095	OTHER	Unknown	E	Catalyzes the transfer of the enolpyruvyl moiety of phosphoenolpyruvate (PEP) to the 5-hydroxyl of shikimate-3- phosphate (S3P) to produce enolpyruvyl shikimate-3-phosphate and inorganic phosphate	Chromosome	26.8999	26.7273	25.7015	25.7558	35	35	35	65.8	65.8	65.8	46.246	0	323.31	5547700000	1347	A0A6N4CWV3	A0A6N4CWV3
A0A6N4CWV7	Argininosuccinate lyase (ASAL) (EC 4.3.2.1) (Arginosuccinase)	argH ASJ32_03330	OTHER	Cytoplasmic	E	argininosuccinate lyase	Chromosome	25.9868	26.1497	26.8539	26.0757	37	37	37	78.7	78.7	78.7	50.21	0	323.31	2552600000	1203	A0A6N4CWV7	A0A6N4CWV7
A0A6N4CWW8	LysR family transcriptional regulator	ASJ32_02645 GO994_09490	OTHER	Cytoplasmic	K	LysR substrate binding domain	Chromosome	22.6552	23.5633	24.0217	23.4375	22	22	22	89.7	89.7	89.7	33.978	0	323.31	714740000	465	A0A6N4CWW8	A0A6N4CWW8
A0A6N4CWX3	StbA family protein	ASJ32_02695 GO994_09440	OTHER	Cytoplasmic	O	PFAM StbA family protein	Chromosome	25.4006	25.3033	25.7126	25.0195	33	33	33	63.2	63.2	63.2	41.711	0	323.31	2131000000	915	A0A6N4CWX3	A0A6N4CWX3
A0A6N4CWX7	Dihydroorotate dehydrogenase (quinone) (EC 1.3.5.2) (DHOdehase) (DHOD) (DHODase) (Dihydroorotate oxidase)	pyrD ASJ32_12985 GO994_10720	OTHER	CytoplasmicMembrane	F	Catalyzes the conversion of dihydroorotate to orotate with quinone as electron acceptor	Chromosome	NaN	21.3763	22.5664	22.9268	35	35	35	81.5	81.5	81.5	36.411	0	323.31	7012200000	1309	A0A6N4CWX7	A0A6N4CWX7
A0A6N4CWX9	Malate dehydrogenase	ASJ32_13910	OTHER	Cytoplasmic	C	Malic enzyme, NAD binding domain	Chromosome	24.3099	24.3226	24.6341	23.3748	20	20	20	54.8	54.8	54.8	44.602	0	296.1	2090200000	242	A0A6N4CWX9	A0A6N4CWX9
A0A6N4CWY0	2,3-dihydroxybenzoate-AMP ligase (EC 2.7.7.58)	entE ASJ32_11195	OTHER	Cytoplasmic	Q	AMP-binding enzyme C-terminal domain	Chromosome	18.3869	18.6573	17.5235	16.6908	49	49	49	73.7	73.7	73.7	59.936	0	323.31	12261000000	1636	A0A6N4CWY0	A0A6N4CWY0
A0A6N4CWY1	Uncharacterized protein	ASJ32_13525	OTHER	Unknown	S	HutD	Chromosome	23.5665	24.1286	23.8478	23.6155	11	11	11	63.8	63.8	63.8	20.42	0	216.7	265060000	163	A0A6N4CWY1	A0A6N4CWY1
A0A6N4CWY5	Ferrochelatase (EC 4.99.1.1) (Heme synthase) (Protoheme ferro-lyase)	hemH ASJ32_11250	OTHER	Cytoplasmic	H	Catalyzes the ferrous insertion into protoporphyrin IX	Chromosome	NaN	20.8066	21.6392	21.7235	25	25	25	82.7	82.7	82.7	36.561	0	323.31	1252600000	541	A0A6N4CWY5	A0A6N4CWY5
A0A6N4CWZ4	Uncharacterized protein	ASJ32_03605 GO994_20455	OTHER	Unknown	-	/	Chromosome	26.3447	25.7568	26.3005	26.0188	15	15	15	93.9	93.9	93.9	10.859	0	323.31	1605300000	740	A0A6N4CWZ4	A0A6N4CWZ4
A0A6N4CWZ5	AMP-dependent synthetase	ASJ32_14015	OTHER	CytoplasmicMembrane	IQ	AMP-binding enzyme	Chromosome	21.2708	20.4906	21.6008	NaN	8	8	8	24.6	24.6	24.6	50.051	0	28.602	46740000	57	A0A6N4CWZ5	A0A6N4CWZ5
A0A6N4CX02	Probable D-serine dehydratase (EC 4.3.1.18) (D-serine deaminase) (DSD)	dsdA ASJ32_13640 GO994_15125	OTHER	Cytoplasmic	E	Belongs to the serine threonine dehydratase family. DsdA subfamily	Chromosome	22.6066	22.3353	22.1887	22.4738	17	17	17	52.4	52.4	52.4	48.247	0	235.12	164770000	172	A0A6N4CX02	A0A6N4CX02
A0A6N4CX03	Chaperone protein DnaK (HSP70) (Heat shock 70 kDa protein) (Heat shock protein 70)	dnaK ASJ32_13375	OTHER	Cytoplasmic	O	Heat shock 70 kDa protein	Chromosome	30.6027	30.7162	30.3723	30.7584	124	124	124	91.7	91.7	91.7	69.557	0	323.31	133200000000	22743	A0A6N4CX03	A0A6N4CX03
A0A6N4CX04	3-hydroxydecanoyl-[acyl-carrier-protein] dehydratase (EC 4.2.1.59) (3-hydroxyacyl-[acyl-carrier-protein] dehydratase FabA) (Beta-hydroxydecanoyl thioester dehydrase) (Trans-2-decenoyl-[acyl-carrier-protein] isomerase) (EC 5.3.3.14)	fabA ASJ32_12955 GO994_11450	OTHER	Cytoplasmic	I	Necessary for the introduction of cis unsaturation into fatty acids. Catalyzes the dehydration of (3R)-3-hydroxydecanoyl- ACP to E-(2)-decenoyl-ACP and then its isomerization to Z-(3)- decenoyl-ACP. Can catalyze the dehydratase reaction for beta- hydroxyacyl-ACPs with saturated chain lengths up to 16 0, being most active on intermediate chain length	Chromosome	27.995	28.5358	28.1117	27.4473	20	20	20	59.1	59.1	59.1	20.327	0	323.31	7427600000	1844	A0A6N4CX04	A0A6N4CX04
A0A6N4CX12	Endopeptidase La (EC 3.4.21.53)	ASJ32_12950 GO994_11445	OTHER	Cytoplasmic	O	Belongs to the peptidase S16 family	Chromosome	24.2827	24.0061	NaN	26.4972	30	30	30	43.6	43.6	43.6	73.34	0	323.31	4152200000	773	A0A6N4CX12	A0A6N4CX12
A0A6N4CX15	Carboxy-terminal protease (EC 3.4.21.102)	ASJ32_13005	SP(Sec/SPI)	CytoplasmicMembrane	M	Belongs to the peptidase S41A family	Chromosome	26.7975	27.0122	27.1326	26.3412	85	85	85	90.2	90.2	90.2	74.836	0	323.31	7149400000	3509	A0A6N4CX15	A0A6N4CX15
A0A6N4CX17	Uncharacterized protein	ASJ32_12145	SP(Sec/SPI)	Unknown	S	Belongs to the UPF0319 family	Chromosome	28.0541	28.5007	28.4502	27.9553	29	29	29	79.9	79.9	79.9	23.987	0	323.31	10606000000	3001	A0A6N4CX17	A0A6N4CX17
A0A6N4CX18	Hydroxyacylglutathione hydrolase (EC 3.1.2.6) (Glyoxalase II) (Glx II)	gloB ASJ32_02855	OTHER	Cytoplasmic	S	Thiolesterase that catalyzes the hydrolysis of S-D- lactoyl-glutathione to form glutathione and D-lactic acid	Chromosome	23.6383	23.658	24.4725	23.6148	12	12	12	48.8	48.8	48.8	28.638	0	323.31	553510000	396	A0A6N4CX18	A0A6N4CX18
A0A6N4CX20	30S ribosomal protein S20	rpsT ASJ32_03815 GO994_18325	OTHER	Unknown	J	Binds directly to 16S ribosomal RNA	Chromosome	27.2736	27.2876	27.312	28.9042	20	20	20	88.5	88.5	88.5	9.5302	0	323.31	8233500000	1860	A0A6N4CX20	A0A6N4CX20
A0A6N4CX24	Spermidine dehydrogenase	ASJ32_13545	TAT(Tat/SPI)	Cytoplasmic	Q	Spermidine dehydrogenase	Chromosome	24.1884	24.3192	25.4311	24.2947	55	55	55	85	85	85	70.805	0	323.31	1401400000	1653	A0A6N4CX24	A0A6N4CX24
A0A6N4CX28	Amino acid ABC transporter substrate-binding protein	ASJ32_12205	SP(Sec/SPI)	Periplasmic	ET	Ligated ion channel L-glutamate- and glycine-binding site	Chromosome	26.6192	26.5946	27.1765	26.5008	32	32	32	73.5	73.5	73.5	29.038	0	323.31	5672300000	1456	A0A6N4CX28	A0A6N4CX28
A0A6N4CX31	Imidazole glycerol phosphate synthase subunit HisF (EC 4.3.2.10) (IGP synthase cyclase subunit) (IGP synthase subunit HisF) (ImGP synthase subunit HisF) (IGPS subunit HisF)	hisF ASJ32_12535 GO994_11915	OTHER	Cytoplasmic	E	IGPS catalyzes the conversion of PRFAR and glutamine to IGP, AICAR and glutamate. The HisF subunit catalyzes the cyclization activity that produces IGP and AICAR from PRFAR using the ammonia provided by the HisH subunit	Chromosome	24.7871	24.9444	21.7661	24.758	30	30	30	98.1	98.1	98.1	28.204	0	323.31	1442700000	635	A0A6N4CX31	A0A6N4CX31
A0A6N4CX33	Neisseria_PilC domain-containing protein	ASJ32_03870	SP(Sec/SPI)	OuterMembrane	NU	Neisseria PilC beta-propeller domain	Chromosome	24.7776	24.9167	25.2624	NaN	39	39	39	49	49	49	130.16	0	290.17	473910000	248	A0A6N4CX33	A0A6N4CX33
A0A6N4CX49	Uncharacterized protein	ASJ32_10495	OTHER	Cytoplasmic	S	protein conserved in bacteria	Chromosome	26.2478	26.6214	26.51	25.5477	26	26	26	83.1	83.1	83.1	18.424	0	323.31	3829400000	1293	A0A6N4CX49	A0A6N4CX49
A0A6N4CX53	Ribonucleoside-diphosphate reductase (EC 1.17.4.1)	ASJ32_13215	OTHER	Cytoplasmic	F	Provides the precursors necessary for DNA synthesis. Catalyzes the biosynthesis of deoxyribonucleotides from the corresponding ribonucleotides	Chromosome	25.8364	25.5058	25.7343	25.5895	77	77	77	82.4	82.4	82.4	85.013	0	323.31	11879000000	4106	A0A6N4CX53	A0A6N4CX53
A0A6N4CX54	tRNA 2-selenouridine synthase (EC 2.9.1.3)	mnmH selU ASJ32_12690 GO994_11760	OTHER	Cytoplasmic	H	Catalyzes the transfer of selenium from selenophosphate for conversion of 2-thiouridine to 2-selenouridine at the wobble position in tRNA	Chromosome	24.3632	24.3174	24.6117	23.9767	25	25	25	70.9	70.9	70.9	41.928	0	268.88	257510000	239	A0A6N4CX54	A0A6N4CX54
A0A6N4CX61	Thiamine-binding periplasmic protein	tbpA ASJ32_00040 GO994_17645	SP(Sec/SPI)	Periplasmic	P	Bacterial extracellular solute-binding protein	Chromosome	23.9201	24.271	24.1563	23.1089	24	24	24	62	62	62	36.252	0	323.31	916870000	512	A0A6N4CX61	A0A6N4CX61
A0A6N4CX69	Acetolactate synthase (EC 2.2.1.6)	ASJ32_00090	OTHER	Cytoplasmic	E	Acetolactate synthase	Chromosome	24.7818	24.8944	25.1644	25.1683	42	42	42	69.4	69.4	69.4	62.43	0	323.31	7505100000	2359	A0A6N4CX69	A0A6N4CX69
A0A6N4CX70	3-oxoacyl-[acyl-carrier-protein] synthase 3 (EC 2.3.1.180) (3-oxoacyl-[acyl-carrier-protein] synthase III) (Beta-ketoacyl-ACP synthase III) (KAS III)	fabH ASJ32_12795 GO994_11650	OTHER	Cytoplasmic	I	Catalyzes the condensation reaction of fatty acid synthesis by the addition to an acyl acceptor of two carbons from malonyl-ACP. Catalyzes the first condensation reaction which initiates fatty acid synthesis and may therefore play a role in governing the total rate of fatty acid production. Possesses both acetoacetyl-ACP synthase and acetyl transacylase activities. Its substrate specificity deter…	Chromosome	26.5505	26.582	26.4851	26.474	24	24	24	68.7	68.7	68.7	33.572	0	323.31	2634800000	881	A0A6N4CX70	A0A6N4CX70
A0A6N4CX74	Translation initiation factor IF-3	infC ASJ32_13180 GO994_10515	OTHER	Cytoplasmic	J	IF-3 binds to the 30S ribosomal subunit and shifts the equilibrum between 70S ribosomes and their 50S and 30S subunits in favor of the free subunits, thus enhancing the availability of 30S subunits on which protein synthesis initiation begins	Chromosome	28.5434	27.8268	28.4822	28.9384	33	33	33	94	94	94	20.598	0	323.31	21699000000	3339	A0A6N4CX74	A0A6N4CX74
A0A6N4CX78	Phosphoribosylaminoimidazole-succinocarboxamide synthase (EC 6.3.2.6) (SAICAR synthetase)	purC ASJ32_00140	OTHER	Cytoplasmic	F	Belongs to the SAICAR synthetase family	Chromosome	27.735	27.9846	26.8215	26.7557	52	52	52	93.2	93.2	93.2	41.034	0	323.31	11332000000	3026	A0A6N4CX78	A0A6N4CX78
A0A6N4CX89	Cytochrome C	ASJ32_10700	SP(Sec/SPI)	Periplasmic	C	Cytochrome C oxidase, cbb3-type, subunit III	Chromosome	23.2221	23.4396	24.0247	23.5231	25	25	25	94.6	94.6	94.6	21.23	0	323.31	938150000	734	A0A6N4CX89	A0A6N4CX89
A0A6N4CX93	Cold shock domain-containing protein (Cold-shock protein)	ASJ32_12495 GO994_15020	OTHER	Cytoplasmic	K	Cold shock	Chromosome	29.5605	29.0039	30.0719	28.0636	12	12	12	100	100	100	7.4983	0	323.31	21119000000	2966	A0A6N4CX93	A0A6N4CX93
A0A6N4CX96	tRNA dimethylallyltransferase (EC 2.5.1.75) (Dimethylallyl diphosphate:tRNA dimethylallyltransferase) (DMAPP:tRNA dimethylallyltransferase) (DMATase) (Isopentenyl-diphosphate:tRNA isopentenyltransferase) (IPP transferase) (IPPT) (IPTase)	miaA ASJ32_00260	OTHER	Cytoplasmic	J	Catalyzes the transfer of a dimethylallyl group onto the adenine at position 37 in tRNAs that read codons beginning with uridine, leading to the formation of N6-(dimethylallyl)adenosine (i(6)A)	Chromosome	22.9762	20.7582	22.2358	21.7886	29	29	29	82.9	82.9	82.9	33.172	0	323.31	884470000	479	A0A6N4CX96	A0A6N4CX96
A0A6N4CXA3	Ribosomal RNA large subunit methyltransferase I (EC 2.1.1.191) (23S rRNA m5C1962 methyltransferase) (rRNA (cytosine-C(5)-)-methyltransferase RlmI)	rlmI ASJ32_12710	OTHER	Cytoplasmic	J	Specifically methylates the cytosine at position 1962 (m5C1962) of 23S rRNA	Chromosome	24.7626	25.4679	25.095	24.6673	45	45	45	76	76	76	44.381	0	323.31	12343000000	2573	A0A6N4CXA3	A0A6N4CXA3
A0A6N4CXA4	Phenylalanine--tRNA ligase beta subunit (EC 6.1.1.20) (Phenylalanyl-tRNA synthetase beta subunit) (PheRS)	pheT ASJ32_13160	OTHER	Cytoplasmic	J	Belongs to the phenylalanyl-tRNA synthetase beta subunit family. Type 1 subfamily	Chromosome	27.9314	28.0866	28.1727	27.6923	94	94	94	81.2	81.2	81.2	86.758	0	323.31	26751000000	7476	A0A6N4CXA4	A0A6N4CXA4
A0A6N4CXA5	UPF0231 family protein	ASJ32_03610 GO994_20450	OTHER	Cytoplasmic	S	Belongs to the UPF0231 family	Chromosome	23.6526	20.933	23.1474	NaN	4	4	4	26.6	26.6	26.6	14.449	0.0011144	2.8592	95257000	49	A0A6N4CXA5	A0A6N4CXA5
A0A6N4CXB0	Histidinol-phosphate aminotransferase (EC 2.6.1.9) (Imidazole acetol-phosphate transaminase)	hisC ASJ32_12570	OTHER	Cytoplasmic	E	Belongs to the class-II pyridoxal-phosphate-dependent aminotransferase family. Histidinol-phosphate aminotransferase subfamily	Chromosome	NaN	21.8761	23.196	23.0649	28	28	28	75.2	75.2	75.2	38.513	0	323.31	1176800000	538	A0A6N4CXB0	A0A6N4CXB0
A0A6N4CXB1	Transcriptional regulator	ASJ32_10810	OTHER	Cytoplasmic	K	Transcriptional regulator	Chromosome	22.9954	24.1592	24.5731	23.8974	16	16	15	58.8	58.8	56.7	36.54	0	73.113	1438900000	287	A0A6N4CXB1	A0A6N4CXB1
A0A6N4CXB2	Extracellular solute-binding protein (Iron ABC transporter substrate-binding protein)	ASJ32_03665 GO994_18485	SP(Sec/SPI)	Periplasmic	P	Iron binding protein FbpA	Chromosome	27.2148	27.4852	26.9453	26.3526	49	49	49	89.3	89.3	89.3	37.316	0	323.31	11559000000	3021	A0A6N4CXB2	A0A6N4CXB2
A0A6N4CXC2	3-oxoacyl-[acyl-carrier-protein] synthase 2 (EC 2.3.1.179)	fabF ASJ32_12815 GO994_11630	SP(Sec/SPI)	CytoplasmicMembrane	I	Catalyzes the condensation reaction of fatty acid synthesis by the addition to an acyl acceptor of two carbons from malonyl-ACP	Chromosome	26.4593	26.4024	25.7537	26.1679	24	24	24	76.5	76.5	76.5	43.161	0	323.31	5053200000	2331	A0A6N4CXC2	A0A6N4CXC2
A0A6N4CXC7	50S ribosomal protein L4	rplD ASJ32_10910 GO994_01150	OTHER	Cytoplasmic	J	One of the primary rRNA binding proteins, this protein initially binds near the 5'-end of the 23S rRNA. It is important during the early stages of 50S assembly. It makes multiple contacts with different domains of the 23S rRNA in the assembled 50S subunit and ribosome	Chromosome	29.7607	29.2767	28.9853	29.9525	47	47	47	97	97	97	22.211	0	323.31	93063000000	8878	A0A6N4CXC7	A0A6N4CXC7
A0A6N4CXD6	50S ribosomal protein L24	rplX ASJ32_10960 GO994_01200	OTHER	Cytoplasmic	J	One of the proteins that surrounds the polypeptide exit tunnel on the outside of the subunit	Chromosome	30.5669	29.8646	30.3769	31.2815	29	29	29	96.2	96.2	96.2	11.299	0	323.31	65630000000	6971	A0A6N4CXD6	A0A6N4CXD6
A0A6N4CXE0	Methionine--tRNA ligase (EC 6.1.1.10) (Methionyl-tRNA synthetase) (MetRS)	metG ASJ32_12730	OTHER	Cytoplasmic	J	Is required not only for elongation of protein synthesis but also for the initiation of all mRNA translation through initiator tRNA(fMet) aminoacylation	Chromosome	27.3974	27.8072	27.1078	26.7786	75	75	75	80.8	80.8	80.8	75.513	0	323.31	12380000000	4160	A0A6N4CXE0	A0A6N4CXE0
A0A6N4CXE4	30S ribosomal protein S11	rpsK ASJ32_11010 GO994_01260	OTHER	Cytoplasmic	J	Located on the platform of the 30S subunit, it bridges several disparate RNA helices of the 16S rRNA. Forms part of the Shine-Dalgarno cleft in the 70S ribosome	Chromosome	27.838	27.471	28.3036	29.7282	22	22	22	72.1	72.1	72.1	13.835	0	323.31	79691000000	6493	A0A6N4CXE4	A0A6N4CXE4
A0A6N4CXE9	23S rRNA accumulation protein YceD (Large ribosomal RNA subunit accumulation protein YceD)	ASJ32_12780	OTHER	Periplasmic	S	Uncharacterized ACR, COG1399	Chromosome	24.6821	24.3801	23.6327	23.9637	12	12	12	55.5	55.5	55.5	19.616	0	41.851	387020000	182	A0A6N4CXE9	A0A6N4CXE9
A0A6N4CXF0	Response regulator (Transcriptional regulator)	ASJ32_12550 GO994_11900	OTHER	Cytoplasmic	T	HD domain	Chromosome	19.5416	NaN	20.0403	20.221	16	16	16	40.7	40.7	40.7	40.917	0	323.31	96722000	105	A0A6N4CXF0	A0A6N4CXF0
A0A6N4CXF1	Amidophosphoribosyltransferase (ATase) (EC 2.4.2.14) (Glutamine phosphoribosylpyrophosphate amidotransferase) (GPATase)	purF ASJ32_11790 GO994_12990	OTHER	Cytoplasmic	F	Catalyzes the formation of phosphoribosylamine from phosphoribosylpyrophosphate (PRPP) and glutamine	Chromosome	27.6937	28.0111	27.9745	28.0878	54	54	54	75.9	75.9	75.9	56.213	0	323.31	21999000000	5110	A0A6N4CXF1	A0A6N4CXF1
A0A6N4CXF4	Peptidyl-prolyl cis-trans isomerase (EC 5.2.1.8)	ASJ32_00610	OTHER	Cytoplasmic	O	Peptidyl-prolyl cis-trans	Chromosome	27.3488	26.3847	27.0616	26.883	6	6	6	37.2	37.2	37.2	21.123	0	121.44	2106000000	694	A0A6N4CXF4	A0A6N4CXF4
A0A6N4CXF9	Penicillin-insensitive murein endopeptidase (Peptidase)	mepA ASJ32_09940 GO994_08525	SP(Sec/SPI)	Unknown	M	Murein endopeptidase that cleaves the D-alanyl-meso-2,6- diamino-pimelyl amide bond that connects peptidoglycan strands. Likely plays a role in the removal of murein from the sacculus	Chromosome	20.9538	20.9288	21.9455	22.0007	14	14	14	58.8	58.8	58.8	27.075	0	114.32	85368000	141	A0A6N4CXF9	A0A6N4CXF9
A0A6N4CXG3	Replicative DNA helicase (EC 3.6.4.12)	ASJ32_00665	OTHER	Cytoplasmic	L	it exhibits DNA-dependent ATPase activity and contains distinct active sites for ATP binding, DNA binding, and interaction with DnaC protein, primase, and other prepriming proteins	Chromosome	24.652	24.2062	25.1659	24.693	47	47	47	87.1	87.1	87.1	51.651	0	323.31	4038600000	1043	A0A6N4CXG3	A0A6N4CXG3
A0A6N4CXG9	NADH-quinone oxidoreductase (EC 7.1.1.-)	ASJ32_10000	OTHER	Cytoplasmic	C	NADH-quinone oxidoreductase	Chromosome	22.3105	22.5487	23.1979	22.726	35	35	35	59.7	59.7	59.7	100.98	0	323.31	428320000	448	A0A6N4CXG9	A0A6N4CXG9
A0A6N4CXI3	3-oxoacyl-[acyl-carrier-protein] synthase 3 (EC 2.3.1.180) (3-oxoacyl-[acyl-carrier-protein] synthase III) (Beta-ketoacyl-ACP synthase III) (KAS III)	fabH ASJ32_00790 GO994_06270	OTHER	Cytoplasmic	I	Catalyzes the condensation reaction of fatty acid synthesis by the addition to an acyl acceptor of two carbons from malonyl-ACP. Catalyzes the first condensation reaction which initiates fatty acid synthesis and may therefore play a role in governing the total rate of fatty acid production. Possesses both acetoacetyl-ACP synthase and acetyl transacylase activities. Its substrate specificity deter…	Chromosome	24.2287	23.7676	21.6973	23.7689	26	26	26	80.9	80.9	80.9	38.462	0	278.02	1105700000	608	A0A6N4CXI3	A0A6N4CXI3
A0A6N4CXI4	Dihydroorotase (EC 3.5.2.3)	ASJ32_10105 GO994_08400	OTHER	Cytoplasmic	F	Amidohydrolase family	Chromosome	27.0662	27.0731	27.3209	26.9497	40	40	40	65.1	65.1	65.1	49.469	0	323.31	5531000000	1674	A0A6N4CXI4	A0A6N4CXI4
A0A6N4CXI5	Proline--tRNA ligase (EC 6.1.1.15) (Prolyl-tRNA synthetase) (ProRS)	proS ASJ32_04085 GO994_18055	OTHER	Cytoplasmic	J	Catalyzes the attachment of proline to tRNA(Pro) in a two-step reaction proline is first activated by ATP to form Pro- AMP and then transferred to the acceptor end of tRNA(Pro). As ProRS can inadvertently accommodate and process non-cognate amino acids such as alanine and cysteine, to avoid such errors it has two additional distinct editing activities against alanine. One activity is designated a…	Chromosome	28.2575	27.8843	28.4936	28.2792	63	63	63	86.2	86.2	86.2	62.722	0	323.31	15117000000	3083	A0A6N4CXI5	A0A6N4CXI5
A0A6N4CXJ0	Ribonuclease E (RNase E) (EC 3.1.26.12)	rne ASJ32_12760	OTHER	Cytoplasmic	J	Endoribonuclease that plays a central role in RNA processing and decay. Required for the maturation of 5S and 16S rRNAs and the majority of tRNAs. Also involved in the degradation of most mRNAs	Chromosome	28.4665	28.2138	28.2632	29.4246	152	152	152	84.6	84.6	84.6	111.85	0	323.31	115650000000	22242	A0A6N4CXJ0	A0A6N4CXJ0
A0A6N4CXJ4	Aminotransferase (EC 2.6.1.-)	ASJ32_12125	OTHER	Cytoplasmic	E	Aminotransferase	Chromosome	23.978	23.8812	24.1956	23.0406	34	34	34	82.1	82.1	82.1	43.041	0	323.31	1345000000	840	A0A6N4CXJ4	A0A6N4CXJ4
A0A6N4CXK4	Nucleoside diphosphate kinase regulator	ASJ32_12180 GO994_14745	OTHER	Cytoplasmic	K	Rnk N-terminus	Chromosome	23.811	23.1974	22.9588	NaN	10	10	10	57.3	57.3	57.3	14.6	0	131.81	229670000	101	A0A6N4CXK4	A0A6N4CXK4
A0A6N4CXL6	SDR family oxidoreductase (Short-chain dehydrogenase)	ASJ32_12920 GO994_11520	OTHER	Cytoplasmic	M	dehydrogenase domain of multifunctional non-ribosomal peptide synthetases and related enzymes	Chromosome	24.7044	24.0375	25.1855	25.3091	70	70	70	89.9	89.9	89.9	73.064	0	323.31	4900100000	1809	A0A6N4CXL6	A0A6N4CXL6
A0A6N4CXL7	AMP-dependent synthetase	ASJ32_11680	OTHER	Cytoplasmic	I	AMP-binding enzyme	Chromosome	22.0898	22.6676	22.6355	21.7494	32	32	32	47.1	47.1	47.1	61.795	0	323.31	1871900000	683	A0A6N4CXL7	A0A6N4CXL7
A0A6N4CXL8	Phosphoribosylformylglycinamidine cyclo-ligase (EC 6.3.3.1) (AIR synthase) (AIRS) (Phosphoribosyl-aminoimidazole synthetase)	purM ASJ32_12300 GO994_14865	OTHER	Cytoplasmic	F	Phosphoribosylformylglycinamidine cyclo-ligase	Chromosome	27.1272	26.4465	24.7728	26.5299	29	29	29	73.3	73.3	73.3	36.697	0	323.31	10118000000	2680	A0A6N4CXL8	A0A6N4CXL8
A0A6N4CXM0	DUF3466 family protein	ASJ32_12960 GO994_11460	SP(Sec/SPI)	Extracellular	S	Protein of unknown function (DUF3466)	Chromosome	25.3622	25.918	26.9766	25.7123	51	51	51	85.1	85.1	85.1	58.666	0	323.31	41334000000	9186	A0A6N4CXM0	A0A6N4CXM0
A0A6N4CXM1	Iron-siderophore ABC transporter ATP-binding protein	ASJ32_11155	OTHER	CytoplasmicMembrane	P	ATPases associated with a variety of cellular activities	Chromosome	23.1475	24.0542	25.1526	24.0418	19	19	19	64.6	64.6	64.6	29.762	0	323.31	1118200000	392	A0A6N4CXM1	A0A6N4CXM1
A0A6N4CXM5	Acetolactate synthase (EC 2.2.1.6)	ASJ32_13850	OTHER	CytoplasmicMembrane	H	Acetolactate synthase	Chromosome	23.6965	23.7966	19.3943	22.2029	21	21	21	46.4	46.4	46.4	58.443	0	323.31	1029200000	475	A0A6N4CXM5	A0A6N4CXM5
A0A6N4CXN0	RNA chaperone ProQ	proQ ASJ32_13010	OTHER	Cytoplasmic	T	RNA chaperone with significant RNA binding, RNA strand exchange and RNA duplexing activities	Chromosome	27.8613	27.6653	28.45	28.4431	41	41	41	89	89	89	23.302	0	323.31	13820000000	2335	A0A6N4CXN0	A0A6N4CXN0
A0A6N4CXN4	50S ribosomal protein L31	rpmE ASJ32_13900 GO994_21265	OTHER	Cytoplasmic	J	Binds the 23S rRNA	Chromosome	24.7379	24.5491	24.1911	25.7851	15	15	15	100	100	100	7.6578	0	323.31	2596500000	954	A0A6N4CXN4	A0A6N4CXN4
A0A6N4CXP5	Ribosome biogenesis GTPase A	ylqF ASJ32_12155 GO994_14720	OTHER	Cytoplasmic	S	Required for a late step of 50S ribosomal subunit assembly. Has GTPase activity	Chromosome	24.2481	23.7388	25.1218	25.6192	36	36	36	80.4	80.4	80.4	35.742	0	323.31	1737100000	710	A0A6N4CXP5	A0A6N4CXP5
A0A6N4CXP9	Ribokinase (RK) (EC 2.7.1.15)	rbsK ASJ32_13115	OTHER	Cytoplasmic	H	Catalyzes the phosphorylation of ribose at O-5 in a reaction requiring ATP and magnesium. The resulting D-ribose-5- phosphate can then be used either for sythesis of nucleotides, histidine, and tryptophan, or as a component of the pentose phosphate pathway	Chromosome	22.2929	23.3188	NaN	22.9427	11	11	11	65.8	65.8	65.8	32.245	0	125.81	207290000	103	A0A6N4CXP9	A0A6N4CXP9
A0A6N4CXQ0	Isocitrate dehydrogenase (EC 1.1.1.41)	ASJ32_01180	OTHER	Cytoplasmic	C	Isocitrate/isopropylmalate dehydrogenase	Chromosome	26.6269	26.3199	25.9053	25.9189	27	27	27	53.1	53.1	53.1	36.103	0	323.31	2746400000	973	A0A6N4CXQ0	A0A6N4CXQ0
A0A6N4CXQ8	50S ribosomal protein L20	rplT ASJ32_13170 GO994_10525	OTHER	Cytoplasmic	J	Binds directly to 23S ribosomal RNA and is necessary for the in vitro assembly process of the 50S ribosomal subunit. It is not involved in the protein synthesizing functions of that subunit	Chromosome	29.9825	29.7996	30.0375	31.3977	28	28	28	83.9	83.9	83.9	13.426	0	323.31	56886000000	3290	A0A6N4CXQ8	A0A6N4CXQ8
A0A6N4CXR4	Phage shock protein A (Phage shock protein PspA)	pspA ASJ32_11750 GO994_12950	OTHER	CytoplasmicMembrane	KT	phage shock protein A	Chromosome	25.8359	26.6562	26.4116	26.0273	49	49	48	97.3	97.3	94.2	25.596	0	323.31	12932000000	2010	A0A6N4CXR4	A0A6N4CXR4
A0A6N4CXR5	Type VI secretion protein	ASJ32_11960	OTHER	Cytoplasmic	T	FHA domain	Chromosome	23.298	22.3959	22.6395	23.5093	18	18	18	48.6	48.6	48.6	45.557	0	77.02	379500000	301	A0A6N4CXR5	A0A6N4CXR5
A0A6N4CXR6	Ribonucleoside-diphosphate reductase (EC 1.17.4.1)	nrdB ASJ32_13220 GO994_10475	OTHER	Cytoplasmic	F	Ribonucleotide reductase, small chain	Chromosome	25.8457	26.0536	25.9033	25.5702	18	18	18	59.4	59.4	59.4	43.181	0	323.31	3263800000	901	A0A6N4CXR6	A0A6N4CXR6
A0A6N4CXR7	Methionine aminopeptidase (MAP) (MetAP) (EC 3.4.11.18) (Peptidase M)	map ASJ32_01285 GO994_06795	OTHER	Cytoplasmic	E	Methionine aminopeptidase	Chromosome	27.7798	27.4816	27.1437	27.0059	22	22	22	96.2	96.2	96.2	29.087	0	323.31	3828600000	925	A0A6N4CXR7	A0A6N4CXR7
A0A6N4CXR8	Alpha/beta fold hydrolase (Lysophospholipase)	ASJ32_09445 GO994_00170	SP(Sec/SPI)	CytoplasmicMembrane	I	Serine aminopeptidase, S33	Chromosome	23.8875	23.8789	23.1311	23.316	17	17	17	50.6	50.6	50.6	38.225	0	323.31	350190000	268	A0A6N4CXR8	A0A6N4CXR8
A0A6N4CXR9	Protein GrpE (HSP-70 cofactor)	grpE ASJ32_13370 GO994_16240	OTHER	Cytoplasmic	O	Participates actively in the response to hyperosmotic and heat shock by preventing the aggregation of stress-denatured proteins, in association with DnaK and GrpE. It is the nucleotide exchange factor for DnaK and may function as a thermosensor. Unfolded proteins bind initially to DnaJ	Chromosome	28.4428	28.5545	27.6686	28.8415	26	26	26	100	100	100	21.198	0	323.31	10925000000	2695	A0A6N4CXR9	A0A6N4CXR9
A0A6N4CXS1	Glycine cleavage system transcriptional repressor	ASJ32_12335	OTHER	Cytoplasmic	E	ACT domain	Chromosome	21.6143	21.5411	NaN	19.7164	3	3	3	18.8	18.8	18.8	18.152	0.00041102	16.008	69880000	80	A0A6N4CXS1	A0A6N4CXS1
A0A6N4CXS4	Inosine-5'-monophosphate dehydrogenase (IMP dehydrogenase) (IMPD) (IMPDH) (EC 1.1.1.205)	guaB ASJ32_11050	OTHER	Cytoplasmic	F	Catalyzes the conversion of inosine 5'-phosphate (IMP) to xanthosine 5'-phosphate (XMP), the first committed and rate- limiting step in the de novo synthesis of guanine nucleotides, and therefore plays an important role in the regulation of cell growth	Chromosome	29.3902	29.1368	30.3245	29.4327	69	69	69	97.5	97.5	97.5	51.631	0	323.31	53080000000	11388	A0A6N4CXS4	A0A6N4CXS4
A0A6N4CXS7	Uncharacterized protein	ASJ32_01335 GO994_06845	SP(Sec/SPI)	Periplasmic	M	Belongs to the skp family	Chromosome	29.5366	29.6726	29.4078	30.1726	43	43	43	84.1	84.1	84.1	18.983	0	323.31	40886000000	6789	A0A6N4CXS7	A0A6N4CXS7
A0A6N4CXT2	Phosphoserine aminotransferase (EC 2.6.1.52) (Phosphohydroxythreonine aminotransferase) (PSAT)	serC ASJ32_11100 GO994_14015	OTHER	Cytoplasmic	E	Catalyzes the reversible conversion of 3- phosphohydroxypyruvate to phosphoserine and of 3-hydroxy-2-oxo-4- phosphonooxybutanoate to phosphohydroxythreonine	Chromosome	26.7802	27.4028	26.7961	26.2297	48	48	48	85.6	85.6	85.6	39.535	0	323.31	11859000000	4063	A0A6N4CXT2	A0A6N4CXT2
A0A6N4CXT9	Type VI secretion protein (Type VI secretion system-associated protein TagO)	tagO ASJ32_11930 GO994_13135	SP(Sec/SPI)	Unknown	S	Type VI secretion-associated protein, VC_A0118 family	Chromosome	20.3737	21.249	21.6126	NaN	12	12	12	58.7	58.7	58.7	21.971	0	205.19	108980000	60	A0A6N4CXT9	A0A6N4CXT9
A0A6N4CXU0	Alcohol dehydrogenase (C-type cytochrome)	ASJ32_13540 GO994_16060	SP(Sec/SPI)	Unknown	C	Cytochrome c	Chromosome	23.5323	23.1277	24.0627	23.5081	11	11	11	35.6	35.6	35.6	42.843	0	162.36	165150000	136	A0A6N4CXU0	A0A6N4CXU0
A0A6N4CXU1	Imidazole glycerol phosphate synthase subunit HisH (EC 4.3.2.10) (IGP synthase glutaminase subunit) (EC 3.5.1.2) (IGP synthase subunit HisH) (ImGP synthase subunit HisH) (IGPS subunit HisH)	hisH ASJ32_12560 GO994_11890	OTHER	Cytoplasmic	E	IGPS catalyzes the conversion of PRFAR and glutamine to IGP, AICAR and glutamate. The HisH subunit provides the glutamine amidotransferase activity that produces the ammonia necessary to HisF for the synthesis of IGP and AICAR	Chromosome	23.7025	23.6841	22.6928	23.9647	14	14	14	50.7	50.7	50.7	22.447	0	257.52	1516200000	654	A0A6N4CXU1	A0A6N4CXU1
A0A6N4CXU8	Type VI secretion protein	ASJ32_11985	OTHER	Cytoplasmic	S	Type VI secretion system, VipA, VC_A0107 or Hcp2	Chromosome	27.5098	27.3897	26.8098	26.6606	36	36	36	99.4	99.4	99.4	18.6	0	323.31	8042800000	1513	A0A6N4CXU8	A0A6N4CXU8
A0A6N4CXV0	Long-chain fatty acid--CoA ligase (EC 6.2.1.3)	ASJ32_12610	OTHER	Cytoplasmic	IQ	AMP-binding enzyme C-terminal domain	Chromosome	24.4874	24.6504	24.6815	25.1587	32	32	32	52.9	52.9	52.9	63.006	0	323.31	2720700000	777	A0A6N4CXV0	A0A6N4CXV0
A0A6N4CXV2	Isochorismate synthase (EC 5.4.4.2)	ASJ32_11200	OTHER	Cytoplasmic	HQ	chorismate binding enzyme	Chromosome	21.1744	20.0354	20.7462	21.6559	35	35	35	66.6	66.6	66.6	41.813	0	323.31	13174000000	1460	A0A6N4CXV2	A0A6N4CXV2
A0A6N4CXV3	tRNA modification GTPase MnmE (EC 3.6.-.-)	trmE mnmE thdF ASJ32_09640 GO994_22205	OTHER	Cytoplasmic	J	Exhibits a very high intrinsic GTPase hydrolysis rate. Involved in the addition of a carboxymethylaminomethyl (cmnm) group at the wobble position (U34) of certain tRNAs, forming tRNA- cmnm(5)s(2)U34	Chromosome	25.6085	24.7887	25.8051	25.8946	38	38	38	84.1	84.1	84.1	49.427	0	323.31	3135600000	1191	A0A6N4CXV3	A0A6N4CXV3
A0A6N4CXV4	Leucine-responsive transcriptional regulator (Leucine-responsive transcriptional regulator Lrp)	lrp ASJ32_11820 GO994_13020	OTHER	Cytoplasmic	K	Lrp/AsnC ligand binding domain	Chromosome	27.196	26.3544	27.2602	27.0016	28	28	28	72.4	72.4	72.4	18.769	0	323.31	5308800000	1216	A0A6N4CXV4	A0A6N4CXV4
A0A6N4CXV9	Histidine kinase	ASJ32_11465	OTHER	Unknown	S	Putative bacterial sensory transduction regulator	Chromosome	24.3443	23.9017	23.4809	23.9623	6	6	6	62.4	62.4	62.4	15.904	0	181.64	886180000	246	A0A6N4CXV9	A0A6N4CXV9
A0A6N4CXW1	Adenylate kinase (AK) (EC 2.7.4.3) (ATP-AMP transphosphorylase) (ATP:AMP phosphotransferase) (Adenylate monophosphate kinase)	adk ASJ32_11255	OTHER	Cytoplasmic	F	Catalyzes the reversible transfer of the terminal phosphate group between ATP and AMP. Plays an important role in cellular energy homeostasis and in adenine nucleotide metabolism	Chromosome	28.108	28.0965	27.8698	27.961	37	37	37	93	93	93	23.196	0	323.31	14361000000	3199	A0A6N4CXW1	A0A6N4CXW1
A0A6N4CXW8	ATP-binding protein Uup (EC 3.6.1.-)	uup ASJ32_12965 GO994_11465	OTHER	Cytoplasmic	S	ABC transporter C-terminal domain	Chromosome	25.9443	24.6718	25.8198	26.8853	54	54	54	70.6	70.6	70.6	71.301	0	323.31	7283700000	1691	A0A6N4CXW8	A0A6N4CXW8
A0A6N4CXX0	LysR family transcriptional regulator	ASJ32_10450	OTHER	Cytoplasmic	K	Transcriptional regulator	Chromosome	19.6069	21.1004	22.3005	NaN	15	15	15	58.8	58.8	58.8	33.627	0	40.686	112670000	112	A0A6N4CXX0	A0A6N4CXX0
A0A6N4CXY6	ATP synthase epsilon chain (ATP synthase F1 sector epsilon subunit) (F-ATPase epsilon subunit)	atpC ASJ32_09800	OTHER	Cytoplasmic	C	Produces ATP from ADP in the presence of a proton gradient across the membrane	Chromosome	27.2982	27.175	28.9258	27.7011	17	17	17	99.3	99.3	99.3	15.272	0	323.31	6189200000	1590	A0A6N4CXY6	A0A6N4CXY6
A0A6N4CXZ2	Acyl-[acyl-carrier-protein]--UDP-N-acetylglucosamine O-acyltransferase (UDP-N-acetylglucosamine acyltransferase) (EC 2.3.1.129)	lpxA ASJ32_01350	OTHER	Cytoplasmic	M	Involved in the biosynthesis of lipid A, a phosphorylated glycolipid that anchors the lipopolysaccharide to the outer membrane of the cell	Chromosome	25.9561	26.3486	25.1534	24.711	32	32	32	77.8	77.8	77.8	27.624	0	323.31	4196300000	1627	A0A6N4CXZ2	A0A6N4CXZ2
A0A6N4CY03	S-(hydroxymethyl)glutathione dehydrogenase (EC 1.1.1.284)	ASJ32_10445 GO994_00710	OTHER	Cytoplasmic	C	Belongs to the zinc-containing alcohol dehydrogenase family. Class-III subfamily	Chromosome	25.9805	26.3968	26.0837	26.3141	34	34	34	76.5	76.5	76.5	40.159	0	323.31	5842500000	1466	A0A6N4CY03	A0A6N4CY03
A0A6N4CY04	50S ribosomal protein L35	rpmI ASJ32_13175 GO994_10520	OTHER	Cytoplasmic	J	Belongs to the bacterial ribosomal protein bL35 family	Chromosome	22.392	21.9728	22.9714	24.7295	5	5	5	38.5	38.5	38.5	7.463	0	37.711	2403000000	689	A0A6N4CY04	A0A6N4CY04
A0A6N4CY11	Guanosine kinase	ASJ32_11240	OTHER	Cytoplasmic	G	COG0524 Sugar kinases, ribokinase family	Chromosome	22.7263	21.1474	22.0638	22.0549	33	33	33	73.3	73.3	73.3	48.153	0	323.31	986860000	543	A0A6N4CY11	A0A6N4CY11
A0A6N4CY15	Translation initiation factor IF-1	infA ASJ32_11850 GO994_13060	OTHER	Cytoplasmic	J	One of the essential components for the initiation of protein synthesis. Stabilizes the binding of IF-2 and IF-3 on the 30S subunit to which N-formylmethionyl-tRNA(fMet) subsequently binds. Helps modulate mRNA selection, yielding the 30S pre- initiation complex (PIC). Upon addition of the 50S ribosomal subunit IF-1, IF-2 and IF-3 are released leaving the mature 70S translation initation complex	Chromosome	26.6046	27.1311	27.3782	26.9964	7	7	7	81.9	81.9	81.9	8.1905	0	323.31	2397500000	791	A0A6N4CY15	A0A6N4CY15
A0A6N4CY16	Addiction module toxin RelE	ASJ32_12050	OTHER	Unknown	S	RelE toxin of RelE / RelB toxin-antitoxin system	Chromosome	21.8773	21.4985	NaN	20.9424	8	8	8	50.9	50.9	50.9	12.052	0	236.05	95831000	81	A0A6N4CY16	A0A6N4CY16
A0A6N4CY22	ATP-dependent RNA helicase RhlE (EC 3.6.4.13)	rhlE ASJ32_13275 GO994_11410	OTHER	Cytoplasmic	L	DEAD-box RNA helicase involved in ribosome assembly. Has RNA-dependent ATPase activity and unwinds double-stranded RNA	Chromosome	26.771	25.3548	26.3194	27.5376	66	66	64	88.7	88.7	86.5	50.432	0	323.31	31157000000	5295	A0A6N4CY22	A0A6N4CY22
A0A6N4CY28	N-acetyltransferase domain-containing protein	ASJ32_10770	OTHER	Cytoplasmic	S	Putative thioesterase (yiiD_Cterm)	Chromosome	24.3082	22.5469	23.2277	23.7724	21	21	21	59.5	59.5	59.5	34.489	0	259.87	1418500000	518	A0A6N4CY28;A0A6N4CY53	A0A6N4CY28
A0A6N4CY32	Peptidase M23 (Peptidoglycan DD-metalloendopeptidase family protein)	ASJ32_10820 GO994_01060	SP(Sec/SPI)	OuterMembrane	D	Peptidase family M23	Chromosome	24.2749	23.7234	25.2874	25.5018	43	43	43	64.7	64.7	64.7	52.5	0	323.31	1925500000	968	A0A6N4CY32	A0A6N4CY32
A0A6N4CY33	Phosphoribosylformylglycinamidine synthase (FGAM synthase) (FGAMS) (EC 6.3.5.3) (Formylglycinamide ribonucleotide amidotransferase) (FGAR amidotransferase) (FGAR-AT)	purL ASJ32_01880	OTHER	Cytoplasmic	F	Phosphoribosylformylglycinamidine synthase involved in the purines biosynthetic pathway. Catalyzes the ATP-dependent conversion of formylglycinamide ribonucleotide (FGAR) and glutamine to yield formylglycinamidine ribonucleotide (FGAM) and glutamate	Chromosome	28.5339	28.8982	28.5869	28.477	151	151	151	93	93	93	141.81	0	323.31	68552000000	16610	A0A6N4CY33	A0A6N4CY33
A0A6N4CY34	Acyl-CoA synthetase	ASJ32_12515	OTHER	Cytoplasmic	IQ	COG0318 Acyl-CoA synthetases (AMP-forming) AMP-acid ligases II	Chromosome	25.5762	25.162	25.0376	25.4589	37	37	37	64.6	64.6	64.6	59.539	0	316.27	1484500000	570	A0A6N4CY34	A0A6N4CY34
A0A6N4CY40	Der GTPase-activating protein YihI	yihI ASJ32_10705 GO994_00950	OTHER	Unknown	S	A GTPase-activating protein (GAP) that modifies Der EngA GTPase function. May play a role in ribosome biogenesis	Chromosome	24.9586	25.1987	22.2503	24.6105	10	10	10	36.3	36.3	36.3	21.714	0	152.86	901290000	216	A0A6N4CY40	A0A6N4CY40
A0A6N4CY46	Histidine biosynthesis bifunctional protein HisB [Includes: Histidinol-phosphatase (EC 3.1.3.15); Imidazoleglycerol-phosphate dehydratase (IGPD) (EC 4.2.1.19)]	hisB ASJ32_12565	OTHER	Cytoplasmic	E	belongs to the histidinol- phosphatase family	Chromosome	24.0707	24.86	23.9032	24.0916	31	31	31	77.5	77.5	77.5	40.854	0	323.31	1589300000	801	A0A6N4CY46	A0A6N4CY46
A0A6N4CY47	50S ribosomal protein L2	rplB ASJ32_10920 GO994_01160	OTHER	Cytoplasmic	J	One of the primary rRNA binding proteins. Required for association of the 30S and 50S subunits to form the 70S ribosome, for tRNA binding and peptide bond formation. It has been suggested to have peptidyltransferase activity	Chromosome	30.491	29.9625	30.5841	31.3314	62	62	62	92.7	92.7	92.7	29.992	0	323.31	234000000000	22505	A0A6N4CY47	A0A6N4CY47
A0A6N4CY50	Transcriptional regulator	ASJ32_01980	OTHER	Cytoplasmic	K	Regulates the transcription of several operons and genes involved in the biogenesis of Fe-S clusters and Fe-S-containing proteins	Chromosome	23.1899	24.8183	24.2654	24.6377	20	20	20	94	94	94	17.922	0	323.31	4657300000	459	A0A6N4CY50	A0A6N4CY50
A0A6N4CY51	SAM-dependent methyltransferase	ASJ32_10430	OTHER	Cytoplasmic	H	DinB superfamily	Chromosome	23.4937	23.1909	22.0443	22.8146	29	29	29	53.6	53.6	53.6	78.699	0	323.31	768640000	397	A0A6N4CY51	A0A6N4CY51
A0A6N4CY55	30S ribosomal protein S14	rpsN ASJ32_10970 GO994_01210	OTHER	Cytoplasmic	J	Binds 16S rRNA, required for the assembly of 30S particles and may also be responsible for determining the conformation of the 16S rRNA at the A site	Chromosome	24.9674	23.2699	22.6452	22.524	19	19	19	81.2	81.2	81.2	11.529	0	323.31	5396400000	2543	A0A6N4CY55	A0A6N4CY55
A0A6N4CY57	Queuine tRNA-ribosyltransferase (EC 2.4.2.29) (Guanine insertion enzyme) (tRNA-guanine transglycosylase)	tgt ASJ32_02035 GO994_10135	OTHER	Cytoplasmic	F	Catalyzes the base-exchange of a guanine (G) residue with the queuine precursor 7-aminomethyl-7-deazaguanine (PreQ1) at position 34 (anticodon wobble position) in tRNAs with GU(N) anticodons (tRNA-Asp, -Asn, -His and -Tyr). Catalysis occurs through a double-displacement mechanism. The nucleophile active site attacks the C1' of nucleotide 34 to detach the guanine base from the RNA, forming a coval…	Chromosome	25.8435	25.7576	26.1051	25.8719	40	40	40	68.3	68.3	68.3	42.959	0	323.31	4809200000	2223	A0A6N4CY57	A0A6N4CY57
A0A6N4CY59	DUF2066 domain-containing protein	ASJ32_12290 GO994_14855	SP(Sec/SPI)	Unknown	S	Uncharacterized protein conserved in bacteria (DUF2066)	Chromosome	23.2801	23.6559	24.1822	22.852	24	24	24	65.8	65.8	65.8	36.43	0	323.31	1199400000	1050	A0A6N4CY59	A0A6N4CY59
A0A6N4CY60	XRE family transcriptional regulator	ASJ32_10575	OTHER	Cytoplasmic	K	Helix-turn-helix domain	Chromosome	23.0174	23.3647	24.1103	23.0561	12	12	12	43.9	43.9	43.9	19.674	0	317.38	162660000	190	A0A6N4CY60	A0A6N4CY60
A0A6N4CY62	DNA-directed RNA polymerase subunit alpha (RNAP subunit alpha) (EC 2.7.7.6) (RNA polymerase subunit alpha) (Transcriptase subunit alpha)	rpoA ASJ32_11020 GO994_01270	OTHER	Cytoplasmic	K	DNA-dependent RNA polymerase catalyzes the transcription of DNA into RNA using the four ribonucleoside triphosphates as substrates	Chromosome	30.6087	31.0122	31.1798	31.0506	52	52	52	98.5	98.5	98.5	36.195	0	323.31	97855000000	12368	A0A6N4CY62	A0A6N4CY62
A0A6N4CY70	Glucose-1-phosphate adenylyltransferase (EC 2.7.7.27) (ADP-glucose pyrophosphorylase) (ADPGlc PPase) (ADP-glucose synthase)	glgC ASJ32_11215	OTHER	Cytoplasmic	H	Catalyzes the synthesis of ADP-glucose, a sugar donor used in elongation reactions on alpha-glucans	Chromosome	23.7061	23.7518	24.1125	23.5877	32	19	19	66.7	44.3	44.3	47.462	0	192.73	445310000	413	A0A6N4CY70	A0A6N4CY70
A0A6N4CY73	Glutathione S-transferase	ASJ32_02145	OTHER	Cytoplasmic	O	Belongs to the GST superfamily	Chromosome	23.2669	22.621	NaN	21.9457	16	16	16	58.6	58.6	58.6	24.874	0	78.939	412620000	269	A0A6N4CY73	A0A6N4CY73
A0A6N4CY75	Glutamine amidotransferase	ASJ32_10590 GO994_00810	OTHER	Cytoplasmic	F	glutamine amidotransferase	Chromosome	NaN	23.0247	23.6748	24.4447	7	7	7	44.6	44.6	44.6	27.729	0	63.909	429480000	94	A0A6N4CY75	A0A6N4CY75
A0A6N4CY77	Threonylcarbamoyl-AMP synthase (TC-AMP synthase) (EC 2.7.7.87) (L-threonylcarbamoyladenylate synthase) (t(6)A37 threonylcarbamoyladenosine biosynthesis protein TsaC) (tRNA threonylcarbamoyladenosine biosynthesis protein TsaC)	tsaC ASJ32_10675 GO994_00910	OTHER	Unknown	J	Required for the formation of a threonylcarbamoyl group on adenosine at position 37 (t(6)A37) in tRNAs that read codons beginning with adenine. Catalyzes the conversion of L-threonine, HCO(3)(-) CO(2) and ATP to give threonylcarbamoyl-AMP (TC-AMP) as the acyladenylate intermediate, with the release of diphosphate	Chromosome	23.407	23.4705	22.6029	23.1109	10	10	10	57.5	57.5	57.5	19.863	0	144.7	241900000	193	A0A6N4CY77	A0A6N4CY77
A0A6N4CY80	50S ribosomal protein L23	rplW ASJ32_10915 GO994_01155	OTHER	Cytoplasmic	J	One of the early assembly proteins it binds 23S rRNA. One of the proteins that surrounds the polypeptide exit tunnel on the outside of the ribosome. Forms the main docking site for trigger factor binding to the ribosome	Chromosome	26.5209	25.7508	27.1663	27.6315	25	25	25	91	91	91	11.163	0	323.31	25932000000	3025	A0A6N4CY80	A0A6N4CY80
A0A6N4CY82	Methionyl-tRNA formyltransferase (EC 2.1.2.9)	fmt ASJ32_10640	OTHER	Cytoplasmic	J	Attaches a formyl group to the free amino group of methionyl-tRNA(fMet). The formyl group appears to play a dual role in the initiator identity of N-formylmethionyl-tRNA by promoting its recognition by IF2 and preventing the misappropriation of this tRNA by the elongation apparatus	Chromosome	25.9654	26.1914	26.569	25.5549	31	31	31	87.6	87.6	87.6	33.942	0	323.31	975360000	600	A0A6N4CY82	A0A6N4CY82
A0A6N4CY83	Recombination protein RecR	recR ASJ32_11270 GO994_14190	OTHER	Cytoplasmic	L	May play a role in DNA repair. It seems to be involved in an RecBC-independent recombinational process of DNA repair. It may act with RecF and RecO	Chromosome	20.5921	20.3919	21.1838	NaN	12	12	12	66.5	66.5	66.5	21.589	0	247.77	362790000	243	A0A6N4CY83	A0A6N4CY83
A0A6N4CY86	Pyruvate formate-lyase-activating enzyme (EC 1.97.1.4)	pflA ASJ32_02265 GO994_09890	OTHER	Cytoplasmic	C	Activation of pyruvate formate-lyase under anaerobic conditions by generation of an organic free radical, using S- adenosylmethionine and reduced flavodoxin as cosubstrates to produce 5'-deoxy-adenosine	Chromosome	23.27	22.7956	23.0701	23.2462	13	13	13	49.4	49.4	49.4	29.25	0	323.31	329870000	307	A0A6N4CY86	A0A6N4CY86
A0A6N4CY88	50S ribosomal protein L5	rplE ASJ32_10965 GO994_01205	OTHER	Cytoplasmic	J	This is 1 of the proteins that binds and probably mediates the attachment of the 5S RNA into the large ribosomal subunit, where it forms part of the central protuberance. In the 70S ribosome it contacts protein S13 of the 30S subunit (bridge B1b), connecting the 2 subunits	Chromosome	29.5402	29.1707	29.1498	29.7991	46	46	46	99.4	99.4	99.4	20.24	0	323.31	119590000000	21394	A0A6N4CY88	A0A6N4CY88
A0A6N4CY93	50S ribosomal subunit assembly factor BipA (EC 3.6.5.-) (GTP-binding protein BipA)	typA bipA ASJ32_10745 GO994_00990	OTHER	CytoplasmicMembrane	T	GTP-binding protein TypA	Chromosome	29.1867	27.9879	28.2961	29.033	77	77	77	87.9	87.9	87.9	66.567	0	323.31	73190000000	12058	A0A6N4CY93	A0A6N4CY93
A0A6N4CY97	30S ribosomal protein S4	rpsD ASJ32_11015 GO994_01265	OTHER	Cytoplasmic	J	One of the primary rRNA binding proteins, it binds directly to 16S rRNA where it nucleates assembly of the body of the 30S subunit	Chromosome	30.5456	30.4708	30.684	31.8611	55	55	55	97.6	97.6	97.6	23.393	0	323.31	201420000000	19109	A0A6N4CY97	A0A6N4CY97
A0A6N4CY99	Protein-export protein SecB	secB ASJ32_10835 GO994_01075	OTHER	Cytoplasmic	U	One of the proteins required for the normal export of preproteins out of the cell cytoplasm. It is a molecular chaperone that binds to a subset of precursor proteins, maintaining them in a translocation-competent state. It also specifically binds to its receptor SecA	Chromosome	29.966	29.7421	29.3181	29.916	12	12	12	58.3	58.3	58.3	17.356	0	323.31	12988000000	1144	A0A6N4CY99	A0A6N4CY99
A0A6N4CYA0	Nucleoid-associated protein	ASJ32_02370	OTHER	Cytoplasmic	S	nucleoid-associated protein	Chromosome	25.15	24.8889	25.4497	25.3094	36	36	36	72.8	72.8	72.8	39.402	0	323.31	2799000000	880	A0A6N4CYA0	A0A6N4CYA0
A0A6N4CYA5	Two-component system response regulator (Two-component system response regulator OmpR)	ompR ASJ32_10885 GO994_01125	OTHER	Cytoplasmic	T	COG0745 Response regulators consisting of a CheY-like receiver domain and a winged-helix DNA-binding domain	Chromosome	22.1704	21.7771	22.6731	22.7232	24	24	24	74.1	74.1	74.1	26.921	0	271.95	913090000	405	A0A6N4CYA5	A0A6N4CYA5
A0A6N4CYA7	Transcriptional regulator	ASJ32_02420	OTHER	Cytoplasmic	K	Transcriptional regulator	Chromosome	24.0397	24.7859	24.575	24.5334	17	17	17	71.8	71.8	71.8	32.675	0	262.78	295190000	128	A0A6N4CYA7	A0A6N4CYA7
A0A6N4CYA8	LemA family protein	ASJ32_09945	LIPO(Sec/SPII)	Unknown	S	LemA family	Chromosome	20.2572	20.8176	NaN	22.5401	26	26	26	76.6	76.6	76.6	22.42	0	323.31	3798300000	1185	A0A6N4CYA8	A0A6N4CYA8
A0A6N4CYB3	LysR family transcriptional regulator	ASJ32_02470	OTHER	Cytoplasmic	K	LysR substrate binding domain	Chromosome	21.7026	22.5175	23.6648	22.5657	15	15	15	43	43	43	33.522	0	276.68	101110000	126	A0A6N4CYB3	A0A6N4CYB3
A0A6N4CYB4	30S ribosomal protein S10	rpsJ nusE ASJ32_10900 GO994_01140	OTHER	Cytoplasmic	J	Involved in the binding of tRNA to the ribosomes	Chromosome	30.054	30.0909	30.2813	30.474	30	30	30	98.1	98.1	98.1	11.752	0	323.31	94206000000	12921	A0A6N4CYB4	A0A6N4CYB4
A0A6N4CYB5	30S ribosomal protein S3	rpsC ASJ32_10935 GO994_01175	OTHER	Cytoplasmic	J	Binds the lower part of the 30S subunit head. Binds mRNA in the 70S ribosome, positioning it for translation	Chromosome	27.5269	27.2827	27.4455	28.0789	50	50	50	93.2	93.2	93.2	26.106	0	323.31	72264000000	7968	A0A6N4CYB5	A0A6N4CYB5
A0A6N4CYC0	30S ribosomal protein S17	rpsQ ASJ32_10950 GO994_01190	OTHER	Cytoplasmic	J	One of the primary rRNA binding proteins, it binds specifically to the 5'-end of 16S ribosomal RNA	Chromosome	29.8422	29.8898	30.5728	30.2714	24	24	24	98.8	98.8	98.8	9.441	0	323.31	42760000000	3082	A0A6N4CYC0	A0A6N4CYC0
A0A6N4CYC1	50S ribosomal protein L18	rplR ASJ32_10985 GO994_01225	OTHER	Cytoplasmic	J	This is one of the proteins that binds and probably mediates the attachment of the 5S RNA into the large ribosomal subunit, where it forms part of the central protuberance	Chromosome	30.4052	29.4183	30.8238	31.6291	23	23	23	87.2	87.2	87.2	12.479	0	323.31	97454000000	11182	A0A6N4CYC1	A0A6N4CYC1
A0A6N4CYC7	Protein translocase subunit SecY	secY ASJ32_11000	OTHER	CytoplasmicMembrane	U	The central subunit of the protein translocation channel SecYEG. Consists of two halves formed by TMs 1-5 and 6-10. These two domains form a lateral gate at the front which open onto the bilayer between TMs 2 and 7, and are clamped together by SecE at the back. The channel is closed by both a pore ring composed of hydrophobic SecY resides and a short helix (helix 2A) on the extracellular side of …	Chromosome	22.1857	20.6512	NaN	22.794	18	18	18	23.8	23.8	23.8	48.252	0	106.62	6536500000	792	A0A6N4CYC7	A0A6N4CYC7
A0A6N4CYD2	Adenosylhomocysteinase	ASJ32_02630 GO994_09515	OTHER	Cytoplasmic	H	May play a key role in the regulation of the intracellular concentration of adenosylhomocysteine	Chromosome	21.6369	21.9641	22.1648	NaN	8	8	8	33	33	33	41.319	0	45.22	48086000	48	A0A6N4CYD2	A0A6N4CYD2
A0A6N4CYE3	D-alanyl-D-alanine carboxypeptidase	ASJ32_10220	SP(Sec/SPI)	Unknown	M	D-alanyl-D-alanine carboxypeptidase	Chromosome	25.4251	25.4955	26.5995	25.604	45	45	45	82.1	82.1	82.1	52.225	0	323.31	3071000000	1617	A0A6N4CYE3	A0A6N4CYE3
A0A6N4CYE4	Molybdenum cofactor biosynthesis protein B	ASJ32_02735	OTHER	Cytoplasmic	H	May be involved in the biosynthesis of molybdopterin	Chromosome	25.5252	25.4932	26.6495	25.4321	16	16	16	76.8	76.8	76.8	18.181	0	323.31	1419000000	643	A0A6N4CYE4	A0A6N4CYE4
A0A6N4CYE5	Aldehyde dehydrogenase	ASJ32_10570	OTHER	Cytoplasmic	C	belongs to the aldehyde dehydrogenase family	Chromosome	24.8415	25.3146	25.7363	24.7598	39	39	39	62.4	62.4	62.4	53.513	0	323.31	2065200000	1142	A0A6N4CYE5	A0A6N4CYE5
A0A6N4CYE6	Uracil phosphoribosyltransferase (EC 2.4.2.9) (UMP pyrophosphorylase) (UPRTase)	upp ASJ32_12295 GO994_14860	OTHER	Cytoplasmic	F	Catalyzes the conversion of uracil and 5-phospho-alpha- D-ribose 1-diphosphate (PRPP) to UMP and diphosphate	Chromosome	26.7161	26.4113	26.2941	26.8442	26	26	26	82.2	82.2	82.2	22.612	0	323.31	5933300000	1985	A0A6N4CYE6	A0A6N4CYE6
A0A6N4CYE7	AAA family ATPase (Phage shock protein operon transcriptional activator)	pspF ASJ32_11755 GO994_12955	OTHER	Cytoplasmic	K	operon transcriptional activator	Chromosome	22.5665	21.8655	21.7568	23.7586	29	29	29	77	77	77	38.566	0	323.31	1865000000	541	A0A6N4CYE7	A0A6N4CYE7
A0A6N4CYE9	Uncharacterized protein	ASJ32_10065 GO994_08440	LIPO(Sec/SPII)	CytoplasmicMembrane	-	-	Chromosome	22.821	21.9945	23.7296	23.4136	15	15	15	51.2	51.2	51.2	33.28	0	101.01	321140000	339	A0A6N4CYE9	A0A6N4CYE9
A0A6N4CYF4	Outer-membrane lipoprotein carrier protein	lolA ASJ32_11810	SP(Sec/SPI)	Periplasmic	M	Participates in the translocation of lipoproteins from the inner membrane to the outer membrane. Only forms a complex with a lipoprotein if the residue after the N-terminal Cys is not an aspartate (The Asp acts as a targeting signal to indicate that the lipoprotein should stay in the inner membrane)	Chromosome	25.3206	25.7185	25.3138	25.3734	21	21	21	84.2	84.2	84.2	22.88	0	323.31	1357200000	672	A0A6N4CYF4	A0A6N4CYF4
A0A6N4CYF5	Uncharacterized protein	ASJ32_10275	SP(Sec/SPI)	Periplasmic	S	Protein of unknown function (DUF541)	Chromosome	25.9166	26.0517	26.4431	26.4907	23	23	23	62.8	62.8	62.8	25.706	0	323.31	3163600000	1125	A0A6N4CYF5	A0A6N4CYF5
A0A6N4CYG3	Glutamate synthase (Glutamate synthase large subunit) (EC 1.4.1.13)	gltB ASJ32_10325 GO994_08150	OTHER	Cytoplasmic	E	glutamate synthase	Chromosome	27.9828	28.3905	28.2699	27.8953	154	154	153	82.4	82.4	82.4	162.62	0	323.31	35170000000	10603	A0A6N4CYG3	A0A6N4CYG3
A0A6N4CYH2	Glutaredoxin	ASJ32_10225	OTHER	Cytoplasmic	O	Glutaredoxin	Chromosome	24.5232	23.0981	NaN	22.3295	10	10	10	100	100	100	9.826	0	110.21	225450000	114	A0A6N4CYH2	A0A6N4CYH2
A0A6N4CYH7	ATP-dependent DNA helicase RecG (EC 3.6.4.12)	recG ASJ32_10780	OTHER	Cytoplasmic	L	Critical role in recombination and DNA repair. Helps process Holliday junction intermediates to mature products by catalyzing branch migration. Has a DNA unwinding activity characteristic of a DNA helicase with a 3'- to 5'- polarity. Unwinds branched duplex DNA (Y-DNA)	Chromosome	22.2259	20.8933	21.3909	22.7521	38	38	38	53.4	53.4	53.4	75.905	0	323.31	983290000	541	A0A6N4CYH7	A0A6N4CYH7
A0A6N4CYH8	Uncharacterized protein	ASJ32_02955	LIPO(Sec/SPII)	Periplasmic	S	Bacterial extracellular solute-binding protein	Chromosome	22.6517	23.5773	24.5785	NaN	13	13	13	39.1	39.1	39.1	42.935	0	35.558	183610000	61	A0A6N4CYH8	A0A6N4CYH8
A0A6N4CYI0	Oligopeptide ABC transporter ATP-binding protein OppD (Oligopeptide transporter ATP-binding component)	oppD ASJ32_10150 GO994_08340	OTHER	CytoplasmicMembrane	P	Belongs to the ABC transporter superfamily	Chromosome	24.0719	23.6781	24.506	24.7574	27	27	27	67.7	67.7	67.7	36.518	0	323.31	4154700000	1333	A0A6N4CYI0	A0A6N4CYI0
A0A6N4CYI7	Glutamate synthase	ASJ32_10330	OTHER	Cytoplasmic	C	glutamate synthase	Chromosome	26.6747	26.9298	27.243	26.8576	51	51	51	82.2	82.2	82.2	51.753	0	323.31	9643200000	3378	A0A6N4CYI7	A0A6N4CYI7
A0A6N4CYJ4	Transcriptional regulator	ASJ32_03055	OTHER	Cytoplasmic	GK	ROK family	Chromosome	22.4237	21.1769	22.1257	22.6716	40	40	40	84.4	84.4	84.4	44.385	0	323.31	1796200000	800	A0A6N4CYJ4	A0A6N4CYJ4
A0A6N4CYJ5	Exodeoxyribonuclease 7 large subunit (EC 3.1.11.6) (Exodeoxyribonuclease VII large subunit) (Exonuclease VII large subunit)	xseA ASJ32_11075 GO994_13990	OTHER	Cytoplasmic	L	Bidirectionally degrades single-stranded DNA into large acid-insoluble oligonucleotides, which are then degraded further into small acid-soluble oligonucleotides	Chromosome	24.2036	24.226	24.9992	24.1077	36	36	36	71.9	71.9	71.9	50.647	0	276.66	556120000	361	A0A6N4CYJ5	A0A6N4CYJ5
A0A6N4CYJ8	Transcription elongation factor GreB (Transcript cleavage factor GreB)	greB ASJ32_10880 GO994_01120	OTHER	Cytoplasmic	K	Necessary for efficient RNA polymerase transcription elongation past template-encoded arresting sites. The arresting sites in DNA have the property of trapping a certain fraction of elongating RNA polymerases that pass through, resulting in locked ternary complexes. Cleavage of the nascent transcript by cleavage factors such as GreA or GreB allows the resumption of elongation from the new 3'termi…	Chromosome	21.6426	22.7165	22.2842	NaN	13	13	13	58	58	58	18.45	0	118.85	86007000	70	A0A6N4CYJ8	A0A6N4CYJ8
A0A6N4CYK7	50S ribosomal protein L22	rplV ASJ32_10930 GO994_01170	OTHER	Cytoplasmic	J	The globular domain of the protein is located near the polypeptide exit tunnel on the outside of the subunit, while an extended beta-hairpin is found that lines the wall of the exit tunnel in the center of the 70S ribosome	Chromosome	30.4891	30.2741	31.4299	31.3968	27	27	27	90.4	90.4	90.4	12.394	0	323.31	87017000000	9624	A0A6N4CYK7	A0A6N4CYK7
A0A6N4CYL0	DUF2913 family protein	ASJ32_10365 GO994_08105	OTHER	Unknown	S	Protein of unknown function (DUF2913)	Chromosome	23.5831	NaN	25.0266	26.455	12	12	12	58.4	58.4	58.4	23.498	0	218.77	406910000	172	A0A6N4CYL0	A0A6N4CYL0
A0A6N4CYL3	DNA gyrase subunit B (EC 5.6.2.2)	gyrB ASJ32_09590 GO994_00020	OTHER	Cytoplasmic	L	A type II topoisomerase that negatively supercoils closed circular double-stranded (ds) DNA in an ATP-dependent manner to modulate DNA topology and maintain chromosomes in an underwound state. Negative supercoiling favors strand separation, and DNA replication, transcription, recombination and repair, all of which involve strand separation. Also able to catalyze the interconversion of other topol…	Chromosome	26.0678	25.3899	25.719	27.1868	99	99	99	80.5	80.5	80.5	89.569	0	323.31	28196000000	6825	A0A6N4CYL3	A0A6N4CYL3
A0A6N4CYL5	50S ribosomal protein L6	rplF ASJ32_10980	OTHER	Cytoplasmic	J	This protein binds to the 23S rRNA, and is important in its secondary structure. It is located near the subunit interface in the base of the L7 L12 stalk, and near the tRNA binding site of the peptidyltransferase center	Chromosome	32.0841	31.7356	32.1051	32.6357	34	34	34	98.3	98.3	98.3	18.51	0	323.31	121680000000	14657	A0A6N4CYL5	A0A6N4CYL5
A0A6N4CYL6	AAA family ATPase (ATPase)	ASJ32_00025 GO994_17660	OTHER	Cytoplasmic	T	Large family of predicted nucleotide-binding domains	Chromosome	20.7024	21.229	20.7631	22.1916	20	20	20	43.2	43.2	43.2	51.021	0	323.31	379040000	251	A0A6N4CYL6	A0A6N4CYL6
A0A6N4CYM1	Exodeoxyribonuclease I (EC 3.1.11.1)	ASJ32_11650	OTHER	Cytoplasmic	L	Exonuclease C-terminal	Chromosome	23.5584	23.3112	21.6285	23.2647	32	32	32	64.2	64.2	64.2	54.528	0	221.56	530970000	389	A0A6N4CYM1	A0A6N4CYM1
A0A6N4CYM3	TetR family transcriptional regulator	ASJ32_09480	OTHER	Cytoplasmic	K	Transcriptional regulator	Chromosome	22.4112	20.8203	NaN	21.3613	10	10	10	61.5	61.5	61.5	24.311	0	147.76	179730000	134	A0A6N4CYM3	A0A6N4CYM3
A0A6N4CYM9	Ferritin (EC 1.16.3.2)	ftnA ASJ32_09360 GO994_00260	OTHER	Cytoplasmic	P	Iron-storage protein	Chromosome	24.1108	23.9095	23.5766	22.896	14	14	14	58.6	58.6	58.6	19.821	0	206.28	561620000	406	A0A6N4CYM9	A0A6N4CYM9
A0A6N4CYN3	Guanosine-3',5'-bis(Diphosphate) 3'-pyrophosphohydrolase	ASJ32_09435	OTHER	Cytoplasmic	KT	In eubacteria ppGpp (guanosine 3'-diphosphate 5-' diphosphate) is a mediator of the stringent response that coordinates a variety of cellular activities in response to changes in nutritional abundance	Chromosome	22.7269	20.8294	20.7412	22.2834	55	55	55	67.9	67.9	67.9	79.225	0	323.31	2447900000	1008	A0A6N4CYN3	A0A6N4CYN3
A0A6N4CYN4	RNA-binding protein	ASJ32_09910	OTHER	Unknown	S	RNA-binding	Chromosome	22.9747	23.4092	23.8639	23.441	6	6	6	53.1	53.1	53.1	8.7948	0	52.455	204520000	101	A0A6N4CYN4	A0A6N4CYN4
A0A6N4CYN7	Glycine cleavage system transcriptional repressor	ASJ32_00125 GO994_17555	OTHER	Cytoplasmic	E	ACT domain	Chromosome	22.5158	21.6663	21.9503	NaN	8	8	8	49.7	49.7	49.7	19.903	0	323.31	206980000	175	A0A6N4CYN7	A0A6N4CYN7
A0A6N4CYP4	Bifunctional protein GlmU [Includes: UDP-N-acetylglucosamine pyrophosphorylase (EC 2.7.7.23) (N-acetylglucosamine-1-phosphate uridyltransferase); Glucosamine-1-phosphate N-acetyltransferase (EC 2.3.1.157)]	glmU ASJ32_09805 GO994_22040	OTHER	Cytoplasmic	M	Catalyzes the last two sequential reactions in the de novo biosynthetic pathway for UDP-N-acetylglucosamine (UDP- GlcNAc). The C-terminal domain catalyzes the transfer of acetyl group from acetyl coenzyme A to glucosamine-1-phosphate (GlcN-1-P) to produce N-acetylglucosamine-1-phosphate (GlcNAc-1-P), which is converted into UDP-GlcNAc by the transfer of uridine 5- monophosphate (from uridine 5-tr…	Chromosome	27.0709	26.8598	27.3191	26.9919	48	48	48	82.3	82.3	82.3	48.631	0	323.31	4893900000	2089	A0A6N4CYP4	A0A6N4CYP4
A0A6N4CYP7	Heat-shock protein (Hsp20 family protein)	ASJ32_09570 GO994_00040	OTHER	Cytoplasmic	O	Belongs to the small heat shock protein (HSP20) family	Chromosome	20.6281	21.0959	20.4863	NaN	14	14	14	77.4	77.4	77.4	15.552	0	73.923	820730000	238	A0A6N4CYP7	A0A6N4CYP7
A0A6N4CYQ2	t(6)A37 threonylcarbamoyladenosine biosynthesis protein TsaE (tRNA threonylcarbamoyladenosine biosynthesis protein TsaE)	tsaE ASJ32_00245 GO994_17435	OTHER	Cytoplasmic	S	Threonylcarbamoyl adenosine biosynthesis protein TsaE	Chromosome	21.8495	21.1708	NaN	21.6067	8	8	8	58	58	58	17.371	0	75.766	185650000	152	A0A6N4CYQ2	A0A6N4CYQ2
A0A6N4CYQ5	Ribonuclease P protein component (RNase P protein) (RNaseP protein) (EC 3.1.26.5) (Protein C5)	rnpA ASJ32_09630	OTHER	Cytoplasmic	J	RNaseP catalyzes the removal of the 5'-leader sequence from pre-tRNA to produce the mature 5'-terminus. It can also cleave other RNA substrates such as 4.5S RNA. The protein component plays an auxiliary but essential role in vivo by binding to the 5'-leader sequence and broadening the substrate specificity of the ribozyme	Chromosome	25.3197	25.9814	26.338	26.5258	17	17	17	88.2	88.2	88.2	13.675	0	218.06	1915100000	536	A0A6N4CYQ5	A0A6N4CYQ5
A0A6N4CYR0	50S ribosomal protein L27	rpmA ASJ32_00300 GO994_17380	OTHER	Cytoplasmic	J	Belongs to the bacterial ribosomal protein bL27 family	Chromosome	26.0506	24.5735	23.5588	26.2086	12	12	12	81.2	81.2	81.2	9.0673	0	323.31	5783800000	1758	A0A6N4CYR0	A0A6N4CYR0
A0A6N4CYR3	Amino acid ABC transporter substrate-binding protein (Transporter substrate-binding domain-containing protein)	ASJ32_09610 GO994_22240	SP(Sec/SPI)	Periplasmic	ET	Bacterial periplasmic substrate-binding proteins	Chromosome	25.1992	25.1639	25.4873	24.7171	31	31	30	83.7	83.7	81.3	27.917	0	323.31	1629400000	941	A0A6N4CYR3	A0A6N4CYR3
A0A6N4CYR4	Probable chromosome-partitioning protein ParB	ASJ32_09755	OTHER	Cytoplasmic	K	Belongs to the ParB family	Chromosome	25.8068	25.8554	26.2013	26.0071	37	37	37	93	93	93	33.52	0	323.31	4271400000	1972	A0A6N4CYR4	A0A6N4CYR4
A0A6N4CYR5	Broad specificity amino-acid racemase (EC 5.1.1.10)	ASJ32_10130	SP(Sec/SPI)	Unknown	M	Catalyzes the interconversion of L-alanine and D- alanine. May also act on other amino acids	Chromosome	26.5731	27.2728	26.3374	25.9248	31	31	31	71.8	71.8	71.8	44.52	0	323.31	3228900000	1371	A0A6N4CYR5	A0A6N4CYR5
A0A6N4CYS5	Energy-dependent translational throttle protein EttA (EC 3.6.1.-) (Translational regulatory factor EttA)	ettA ASJ32_00405	OTHER	Cytoplasmic	S	ABC transporter	Chromosome	26.2322	25.7808	25.9754	26.7679	70	70	70	90.6	90.6	90.6	62.4	0	323.31	13457000000	3821	A0A6N4CYS5	A0A6N4CYS5
A0A6N4CYS6	ATP synthase gamma chain (ATP synthase F1 sector gamma subunit) (F-ATPase gamma subunit)	atpG ASJ32_09790 GO994_22055	OTHER	Unknown	C	Produces ATP from ADP in the presence of a proton gradient across the membrane. The gamma chain is believed to be important in regulating ATPase activity and the flow of protons through the CF(0) complex	Chromosome	26.5918	26.571	26.8059	26.7617	46	46	46	97.2	97.2	97.2	31.936	0	323.31	19683000000	4958	A0A6N4CYS6	A0A6N4CYS6
A0A6N4CYT1	Aminotransferase (EC 2.6.1.2)	ASJ32_10235	OTHER	Cytoplasmic	E	Aminotransferase	Chromosome	23.595	24.3549	22.2775	22.6572	36	36	36	66.3	66.3	66.3	45.671	0	323.31	2125900000	861	A0A6N4CYT1	A0A6N4CYT1
A0A6N4CYT8	Uncharacterized protein	ASJ32_01715	SP(Sec/SPI)	Periplasmic	C	Cytochrome c554 and c-prime	Chromosome	20.5609	20.5731	22.1194	21.5277	31	31	31	38.5	38.5	38.5	109.33	0	123.71	124240000	180	A0A6N4CYT8	A0A6N4CYT8
A0A6N4CYU8	Nucleoside diphosphate kinase (NDK) (NDP kinase) (EC 2.7.4.6) (Nucleoside-2-P kinase)	ndk ASJ32_01935 GO994_10235	OTHER	Cytoplasmic	F	Major role in the synthesis of nucleoside triphosphates other than ATP. The ATP gamma phosphate is transferred to the NDP beta phosphate via a ping-pong mechanism, using a phosphorylated active-site intermediate	Chromosome	28.1043	28.2631	28.1058	28.292	17	17	17	62.7	62.7	62.7	15.429	0	323.31	9389700000	1836	A0A6N4CYU8	A0A6N4CYU8
A0A6N4CYV3	Peptidase S66	ASJ32_01835	OTHER	Cytoplasmic	V	LD-carboxypeptidase	Chromosome	20.8541	21.4367	21.2246	20.0558	12	12	12	37.4	37.4	37.4	36.623	0	71.751	161190000	195	A0A6N4CYV3	A0A6N4CYV3
A0A6N4CYV9	tRNA (cytidine/uridine-2'-O-)-methyltransferase TrmJ (EC 2.1.1.200) (tRNA (cytidine(32)/uridine(32)-2'-O)-methyltransferase) (tRNA Cm32/Um32 methyltransferase)	trmJ ASJ32_01985	OTHER	Cytoplasmic	J	Catalyzes the formation of 2'O-methylated cytidine (Cm32) or 2'O-methylated uridine (Um32) at position 32 in tRNA	Chromosome	25.2949	24.8886	24.4342	24.4917	16	16	16	81.2	81.2	81.2	26.351	0	323.31	1049800000	424	A0A6N4CYV9	A0A6N4CYV9
A0A6N4CYW5	Cold shock-like protein CspD	cspD ASJ32_11865 GO994_13075	OTHER	Cytoplasmic	K	Cold shock	Chromosome	24.2484	23.1301	23.9957	23.3596	6	6	6	98.6	98.6	98.6	7.7777	0	274.21	357580000	207	A0A6N4CYW5	A0A6N4CYW5
A0A6N4CYW9	Aminopeptidase (EC 3.4.11.23)	ASJ32_01940	OTHER	Cytoplasmic	E	Probably plays an important role in intracellular peptide degradation	Chromosome	26.8134	27.3829	27.1254	25.9137	32	30	30	85.9	84.1	84.1	45.767	0	323.31	8547100000	2658	A0A6N4CYW9	A0A6N4CYW9
A0A6N4CYX1	ClpV1 family T6SS ATPase	ASJ32_11940	OTHER	Cytoplasmic	O	C-terminal, D2-small domain, of ClpB protein	Chromosome	23.879	22.639	24.1561	25.6609	70	70	70	67.7	67.7	67.7	97.062	0	323.31	3726600000	1384	A0A6N4CYX1	A0A6N4CYX1
A0A6N4CYX2	Trk system potassium uptake protein TrkA	trkA sapG ASJ32_10630 GO994_00850	OTHER	CytoplasmicMembrane	P	TrkA-N domain	Chromosome	23.4933	23.1223	23.662	23.3113	34	34	34	74.9	74.9	74.9	50.176	0	241.59	508040000	311	A0A6N4CYX2	A0A6N4CYX2
A0A6N4CYX3	XRE family transcriptional regulator	ASJ32_01920	OTHER	Periplasmic	S	Domain of unknown function (DUF4115)	Chromosome	22.2416	22.3419	22.6207	23.5865	26	26	26	53.6	53.6	53.6	32.709	0	323.31	5167100000	988	A0A6N4CYX3	A0A6N4CYX3
A0A6N4CYX4	FAD-dependent oxidoreductase (NADH dehydrogenase)	ASJ32_01850 GO994_13785	OTHER	CytoplasmicMembrane	C	Pyridine nucleotide-disulphide oxidoreductase	Chromosome	22.1778	22.371	22.329	NaN	48	48	48	85.8	85.8	85.8	47.133	0	323.31	8363500000	2341	A0A6N4CYX4	A0A6N4CYX4
A0A6N4CYX9	Iron-sulfur cluster assembly scaffold protein IscU	iscU ASJ32_01970 GO994_10200	OTHER	Cytoplasmic	C	A scaffold on which IscS assembles Fe-S clusters. It is likely that Fe-S cluster coordination is flexible as the role of this complex is to build and then hand off Fe-S clusters	Chromosome	25.7482	25.2704	24.0256	23.9199	22	22	22	97.6	97.6	97.6	13.527	0	323.31	1810900000	715	A0A6N4CYX9	A0A6N4CYX9
A0A6N4CYY1	Transporter	ASJ32_09490	OTHER	CytoplasmicMembrane	V	Belongs to the resistance-nodulation-cell division (RND) (TC 2.A.6) family	Chromosome	21.7508	21.6226	23.1191	23.7501	56	56	56	45.1	45.1	45.1	110.83	0	323.31	14737000000	3061	A0A6N4CYY1	A0A6N4CYY1
A0A6N4CYY4	Ancillary SecYEG translocon subunit	ASJ32_01905 GO994_10265	OTHER	Unknown	S	Tetratricopeptide repeat-like domain	Chromosome	23.0496	23.2285	23.7616	23.508	25	25	25	88.9	88.9	88.9	23.065	0	323.31	4176000000	1605	A0A6N4CYY4	A0A6N4CYY4
A0A6N4CYY5	Inositol-1-monophosphatase (EC 3.1.3.25)	ASJ32_02155	OTHER	Cytoplasmic	G	inositol monophosphatase	Chromosome	25.9192	26.3619	25.1565	26.0037	35	35	35	98.1	98.1	98.1	29.139	0	323.31	18027000000	3628	A0A6N4CYY5	A0A6N4CYY5
A0A6N4CYY6	Metal-dependent carboxypeptidase (EC 3.4.17.19)	ASJ32_00840	OTHER	Cytoplasmic	E	Broad specificity carboxypetidase that releases amino acids sequentially from the C-terminus, including neutral, aromatic, polar and basic residues	Chromosome	25.3204	25.9597	24.5908	26.0592	55	55	55	90.2	90.2	90.2	55.472	0	323.31	21337000000	3525	A0A6N4CYY6	A0A6N4CYY6
A0A6N4CYY7	Protein translocase subunit SecD	secD ASJ32_02025 GO994_10145	OTHER	CytoplasmicMembrane	U	Part of the Sec protein translocase complex. Interacts with the SecYEG preprotein conducting channel. SecDF uses the proton motive force (PMF) to complete protein translocation after the ATP-dependent function of SecA	Chromosome	21.0678	21.3753	22.1491	23.0933	64	64	64	68.9	68.9	68.9	67.492	0	323.31	18378000000	4815	A0A6N4CYY7	A0A6N4CYY7
A0A6N4CYZ6	Chaperone protein HscA homolog	hscA ASJ32_01955 GO994_10215	OTHER	Cytoplasmic	O	Chaperone involved in the maturation of iron-sulfur cluster-containing proteins. Has a low intrinsic ATPase activity which is markedly stimulated by HscB	Chromosome	26.6063	25.7683	25.914	26.8267	57	57	57	80.3	80.3	80.3	65.215	0	323.31	12421000000	3541	A0A6N4CYZ6	A0A6N4CYZ6
A0A6N4CYZ9	Chromosomal replication initiator protein DnaA	dnaA ASJ32_09605 GO994_00005	OTHER	Cytoplasmic	L	it binds specifically double-stranded DNA at a 9 bp consensus (dnaA box) 5'-TTATC CA A CA A-3'. DnaA binds to ATP and to acidic phospholipids	Chromosome	22.2412	22.5417	22.6654	23.3831	46	46	46	81.6	81.6	81.6	51.846	0	323.31	4397300000	1114	A0A6N4CYZ9	A0A6N4CYZ9
A0A6N4CZ13	Putative beta-barrel assembly-enhancing protease (EC 3.4.-.-)	ASJ32_02325	SP(Sec/SPI)	Unknown	S	Functions as both a chaperone and a metalloprotease. Maintains the integrity of the outer membrane by promoting either the assembly or the elimination of outer membrane proteins, depending on their folding state	Chromosome	23.0248	22.3816	22.6183	22.8401	24	24	24	56.2	56.2	56.2	52.549	0	323.31	515820000	335	A0A6N4CZ13	A0A6N4CZ13
A0A6N4CZ20	Alpha-2-macroglobulin	ASJ32_02250	LIPO(Sec/SPII)	Unknown	S	Alpha-2-Macroglobulin	Chromosome	22.3152	21.9158	23.2805	23.6083	132	132	132	68.3	68.3	68.3	179.39	0	323.31	4464800000	2674	A0A6N4CZ20	A0A6N4CZ20
A0A6N4CZ22	50S ribosomal protein L16	rplP ASJ32_10940 GO994_01180	OTHER	Cytoplasmic	J	Binds 23S rRNA and is also seen to make contacts with the A and possibly P site tRNAs	Chromosome	29.436	28.9419	29.8808	29.3306	23	23	23	80.3	80.3	80.3	15.396	0	323.31	51931000000	5231	A0A6N4CZ22	A0A6N4CZ22
A0A6N4CZ26	DUF2750 domain-containing protein	ASJ32_11230 GO994_14150	OTHER	Cytoplasmic	S	Protein of unknown function (DUF2750)	Chromosome	25.812	25.5402	24.1296	24.6892	9	9	9	54.2	54.2	54.2	13.872	0	278.71	458090000	258	A0A6N4CZ26	A0A6N4CZ26
A0A6N4CZ31	30S ribosomal protein S5	rpsE ASJ32_10990 GO994_01230	OTHER	Cytoplasmic	J	Located at the back of the 30S subunit body where it stabilizes the conformation of the head with respect to the body	Chromosome	28.0756	28.2534	29.4348	30.2793	35	35	35	99.4	99.4	99.4	17.339	0	323.31	106450000000	9122	A0A6N4CZ31	A0A6N4CZ31
A0A6N4CZ32	5'-methylthioadenosine/S-adenosylhomocysteine nucleosidase (MTA/SAH nucleosidase) (MTAN) (EC 3.2.2.9) (5'-deoxyadenosine nucleosidase) (DOA nucleosidase) (dAdo nucleosidase) (5'-methylthioadenosine nucleosidase) (MTA nucleosidase) (S-adenosylhomocysteine nucleosidase) (AdoHcy nucleosidase) (SAH nucleosidase) (SRH nucleosidase)	mtnN ASJ32_02175	OTHER	Cytoplasmic	F	Catalyzes the irreversible cleavage of the glycosidic bond in both 5'-methylthioadenosine (MTA) and S- adenosylhomocysteine (SAH AdoHcy) to adenine and the corresponding thioribose, 5'-methylthioribose and S-ribosylhomocysteine, respectively	Chromosome	25.4709	26.0481	26.6378	25.7714	19	19	19	100	100	100	24.621	0	323.31	1831300000	697	A0A6N4CZ32	A0A6N4CZ32
A0A6N4CZ35	Glutamine--fructose-6-phosphate aminotransferase [isomerizing] (EC 2.6.1.16) (D-fructose-6-phosphate amidotransferase) (GFAT) (Glucosamine-6-phosphate synthase) (Hexosephosphate aminotransferase) (L-glutamine--D-fructose-6-phosphate amidotransferase)	glmS ASJ32_09835	OTHER	Cytoplasmic	M	Catalyzes the first step in hexosamine metabolism, converting fructose-6P into glucosamine-6P using glutamine as a nitrogen source	Chromosome	26.1743	26.3804	26.8591	26.6317	60	60	60	80.5	80.5	80.5	66.339	0	323.31	5147900000	2205	A0A6N4CZ35	A0A6N4CZ35
A0A6N4CZ47	Ecotin (Serine protease inhibitor ecotin)	eco ASJ32_02410 GO994_09740	SP(Sec/SPI)	Periplasmic	M	General inhibitor of pancreatic serine proteases inhibits chymotrypsin, trypsin, elastases, factor X, kallikrein as well as a variety of other proteases	Chromosome	25.1327	25.2171	26.1112	25.2017	15	15	15	84.4	84.4	84.4	18.256	0	323.31	1959200000	969	A0A6N4CZ47	A0A6N4CZ47
A0A6N4CZ48	Nickel transporter	ASJ32_02290	SP(Sec/SPI)	Periplasmic	ET	Belongs to the bacterial solute-binding protein 3 family	Chromosome	25.877	26.0499	25.2214	25.1767	44	44	44	84.8	84.8	84.8	28.483	0	323.31	5697300000	2356	A0A6N4CZ48	A0A6N4CZ48
A0A6N4CZ49	ATP synthase subunit b (ATP synthase F(0) sector subunit b) (ATPase subunit I) (F-type ATPase subunit b) (F-ATPase subunit b)	atpF ASJ32_09775 GO994_22070	OTHER	CytoplasmicMembrane	C	Component of the F(0) channel, it forms part of the peripheral stalk, linking F(1) to F(0)	Chromosome	23.5657	23.3344	23.8326	25.5435	37	37	37	85.3	85.3	85.3	17.063	0	323.31	46054000000	3986	A0A6N4CZ49	A0A6N4CZ49
A0A6N4CZ57	Phospho-2-dehydro-3-deoxyheptonate aldolase (EC 2.5.1.54)	ASJ32_02430 GO994_09720	OTHER	Cytoplasmic	E	Stereospecific condensation of phosphoenolpyruvate (PEP) and D-erythrose-4-phosphate (E4P) giving rise to 3-deoxy-D- arabino-heptulosonate-7-phosphate (DAHP)	Chromosome	26.0472	25.2415	25.1841	26.1622	29	28	28	71.7	71.1	71.1	39.353	0	323.31	2758800000	963	A0A6N4CZ57	A0A6N4CZ57
A0A6N4CZ69	1-deoxy-D-xylulose 5-phosphate reductoisomerase (DXP reductoisomerase) (EC 1.1.1.267) (1-deoxyxylulose-5-phosphate reductoisomerase) (2-C-methyl-D-erythritol 4-phosphate synthase)	ispC dxr ASJ32_01320 GO994_06830	OTHER	Cytoplasmic	I	Catalyzes the NADP-dependent rearrangement and reduction of 1-deoxy-D-xylulose-5-phosphate (DXP) to 2-C-methyl-D-erythritol 4-phosphate (MEP)	Chromosome	23.8725	24.4237	24.1433	23.3177	23	23	23	75.3	75.3	75.3	42	0	167.03	755040000	373	A0A6N4CZ69	A0A6N4CZ69
A0A6N4CZ73	Glutamate dehydrogenase	ASJ32_02565	OTHER	OuterMembrane	E	Belongs to the Glu Leu Phe Val dehydrogenases family	Chromosome	22.9794	23.0034	22.8425	23.641	40	40	40	78.6	78.6	78.6	48.457	0	323.31	1725100000	994	A0A6N4CZ73	A0A6N4CZ73
A0A6N4CZ74	Peptide ABC transporter ATP-binding protein	ASJ32_10140	OTHER	CytoplasmicMembrane	P	oligopeptide ABC transporter, ATP-binding protein	Chromosome	22.4769	21.7218	21.7984	24.0701	30	30	30	68	68	68	36.39	0	323.31	1781400000	793	A0A6N4CZ74	A0A6N4CZ74
A0A6N4CZ79	DUF533 domain-containing protein	ASJ32_02530 GO994_09605	OTHER	CytoplasmicMembrane	S	Protein of unknown function (DUF533)	Chromosome	23.6152	23.5236	24.8664	24.6642	28	28	28	94	94	94	23.168	0	323.31	7457500000	1926	A0A6N4CZ79	A0A6N4CZ79
A0A6N4CZ88	Outer membrane protein assembly factor BamB	bamB ASJ32_01900	LIPO(Sec/SPII)	Unknown	M	Part of the outer membrane protein assembly complex, which is involved in assembly and insertion of beta-barrel proteins into the outer membrane	Chromosome	23.1687	23.4144	24.5503	24.1592	45	45	45	72.6	72.6	72.6	42.446	0	323.31	10756000000	3843	A0A6N4CZ88	A0A6N4CZ88
A0A6N4CZ94	Enoyl-[acyl-carrier-protein] reductase [NADH] (ENR) (EC 1.3.1.9)	fabV ASJ32_10245	OTHER	Cytoplasmic	I	Involved in the final reduction of the elongation cycle of fatty acid synthesis (FAS II). Catalyzes the reduction of a carbon-carbon double bond in an enoyl moiety that is covalently linked to an acyl carrier protein (ACP)	Chromosome	26.9151	27.0947	26.9677	26.455	51	51	51	88.7	88.7	88.7	43.474	0	323.31	12525000000	3296	A0A6N4CZ94	A0A6N4CZ94
A0A6N4CZ95	2Fe-2S ferredoxin	fdx ASJ32_01950 GO994_10220	OTHER	Cytoplasmic	C	Ferredoxin, 2Fe-2S type, ISC system	Chromosome	24.7271	23.8388	22.3657	NaN	11	11	11	93.8	93.8	93.8	12.346	0	204.59	278730000	143	A0A6N4CZ95	A0A6N4CZ95
A0A6N4CZ96	Molybdopterin molybdenumtransferase (EC 2.10.1.1)	ASJ32_02670	OTHER	Cytoplasmic	H	MoeA N-terminal region (domain I and II)	Chromosome	25.7034	25.2145	25.3041	25.5998	25	25	25	86.3	86.3	86.3	43.238	0	323.31	1835400000	786	A0A6N4CZ96	A0A6N4CZ96
A0A6N4CZ97	YceI domain-containing protein	ASJ32_02640 GO994_09495	SP(Sec/SPI)	Unknown	S	Belongs to the UPF0312 family	Chromosome	21.828	21.0665	20.5352	20.1459	14	14	14	76.3	76.3	76.3	20.271	0	323.31	166810000	241	A0A6N4CZ97	A0A6N4CZ97
A0A6N4CZA5	Methylmalonate-semialdehyde dehydrogenase	ASJ32_10585	OTHER	Cytoplasmic	C	Aldehyde dehydrogenase family	Chromosome	22.3003	22.5897	22.8316	22.4214	23	23	23	63.5	63.5	63.5	53.593	0	323.31	166770000	146	A0A6N4CZA5	A0A6N4CZA5
A0A6N4CZA8	Biosynthetic arginine decarboxylase (ADC) (EC 4.1.1.19)	speA ASJ32_02605	OTHER	Unknown	H	Catalyzes the biosynthesis of agmatine from arginine	Chromosome	28.3048	28.356	28.4744	28.3672	48	48	48	74.1	74.1	74.1	70.262	0	323.31	15883000000	4836	A0A6N4CZA8	A0A6N4CZA8
A0A6N4CZC0	Formate--tetrahydrofolate ligase (EC 6.3.4.3) (Formyltetrahydrofolate synthetase) (FHS) (FTHFS)	fhs ASJ32_02655 GO994_09480	OTHER	Cytoplasmic	F	Belongs to the formate--tetrahydrofolate ligase family	Chromosome	22.955	22.3508	23.0987	23.903	34	34	34	72.2	72.2	72.2	60.953	0	299.67	538930000	407	A0A6N4CZC0	A0A6N4CZC0
A0A6N4CZD8	Negative modulator of initiation of replication	seqA ASJ32_02995	OTHER	Unknown	L	Negative regulator of replication initiation, which contributes to regulation of DNA replication and ensures that replication initiation occurs exactly once per chromosome per cell cycle. Binds to pairs of hemimethylated GATC sequences in the oriC region, thus preventing assembly of replication proteins and re- initiation at newly replicated origins. Repression is relieved when the region becomes…	Chromosome	26.4789	26.6425	26.5545	26.1833	15	15	15	71.6	71.6	71.6	18.848	0	317.34	1840700000	490	A0A6N4CZD8	A0A6N4CZD8
A0A6N4CZD9	Periplasmic nitrate reductase (EC 1.9.6.1)	napA ASJ32_02760 GO994_09375	TAT(Tat/SPI)	Periplasmic	C	nitrate reductase (NAP). Only expressed at high levels during aerobic growth. NapAB complex receives electrons from the membrane-anchored tetraheme protein NapC	Chromosome	22.6767	22.4509	22.0814	21.4799	42	42	42	50.7	50.7	50.7	92.834	0	313.38	322530000	471	A0A6N4CZD9	A0A6N4CZD9
A0A6N4CZE0	Glutamine synthetase (EC 6.3.1.2)	glnA ASJ32_10740	OTHER	Cytoplasmic	E	glutamine synthetase	Chromosome	29.2802	29.9453	30.3513	29.2097	53	53	53	99.8	99.8	99.8	51.809	0	323.31	40880000000	7627	A0A6N4CZE0	A0A6N4CZE0
A0A6N4CZE5	Glucosamine-6-phosphate deaminase (EC 3.5.99.6) (GlcN6P deaminase) (GNPDA) (Glucosamine-6-phosphate isomerase)	nagB ASJ32_03045	OTHER	Cytoplasmic	G	Catalyzes the reversible isomerization-deamination of glucosamine 6-phosphate (GlcN6P) to form fructose 6-phosphate (Fru6P) and ammonium ion	Chromosome	25.7238	26.1281	26.7847	26.1782	19	19	19	53.8	53.8	53.8	29.625	0	323.31	4106200000	1531	A0A6N4CZE5	A0A6N4CZE5
A0A6N4CZE6	Glutathione reductase (Glutathione-disulfide reductase) (EC 1.8.1.7)	gorA ASJ32_09500 GO994_00115	OTHER	Cytoplasmic	C	Belongs to the class-I pyridine nucleotide-disulfide oxidoreductase family	Chromosome	25.7114	26.0319	25.5219	24.7918	34	34	34	66.8	66.8	66.8	48.568	0	323.31	2518200000	1172	A0A6N4CZE6	A0A6N4CZE6
A0A6N4CZE8	Class II glutamine amidotransferase (Glutamine amidotransferase)	ASJ32_02815 GO994_09320	OTHER	Cytoplasmic	S	glutamine amidotransferase	Chromosome	23.2211	23.9213	24.162	23.5753	15	15	15	58	58	58	28.997	0	143.2	498280000	331	A0A6N4CZE8	A0A6N4CZE8
A0A6N4CZF4	4-hydroxy-tetrahydrodipicolinate synthase (HTPA synthase) (EC 4.3.3.7)	dapA ASJ32_00130	SP(Sec/SPI)	Cytoplasmic	E	Catalyzes the condensation of (S)-aspartate-beta- semialdehyde (S)-ASA and pyruvate to 4-hydroxy- tetrahydrodipicolinate (HTPA)	Chromosome	24.4796	24.3378	25.257	24.361	21	21	21	63.7	63.7	63.7	30.879	0	323.31	844030000	470	A0A6N4CZF4	A0A6N4CZF4
A0A6N4CZF8	Fe/S biogenesis protein NfuA	nfuA ASJ32_10845	OTHER	Cytoplasmic	C	Involved in iron-sulfur cluster biogenesis. Binds a 4Fe- 4S cluster, can transfer this cluster to apoproteins, and thereby intervenes in the maturation of Fe S proteins. Could also act as a scaffold chaperone for damaged Fe S proteins	Chromosome	24.8932	25.141	23.3741	24.8722	10	10	10	41.1	41.1	41.1	21.003	0	111.64	566880000	216	A0A6N4CZF8	A0A6N4CZF8
A0A6N4CZG0	Vitamin B12-dependent ribonucleotide reductase (EC 1.17.4.1)	ASJ32_00015	OTHER	Cytoplasmic	F	Catalyzes the reduction of ribonucleotides to deoxyribonucleotides. May function to provide a pool of deoxyribonucleotide precursors for DNA repair during oxygen limitation and or for immediate growth after restoration of oxygen	Chromosome	24.389	24.5299	25.0702	24.6995	47	47	47	67.4	67.4	67.4	79.346	0	323.31	2328900000	1337	A0A6N4CZG0	A0A6N4CZG0
A0A6N4CZG6	Flavodoxin	ASJ32_03015	OTHER	Cytoplasmic	C	Low-potential electron donor to a number of redox enzymes	Chromosome	25.2942	25.084	24.1676	24.5499	10	10	10	53.4	53.4	53.4	19.494	0	323.31	977410000	657	A0A6N4CZG6	A0A6N4CZG6
A0A6N4CZH0	N-acetylmuramoyl-L-alanine amidase (EC 3.5.1.28)	ASJ32_00250	SP(Sec/SPI)	Unknown	M	Ami_3	Chromosome	24.0425	24.129	24.9669	24.8884	53	53	53	79.5	79.5	79.5	55.956	0	323.31	1647300000	1051	A0A6N4CZH0	A0A6N4CZH0
A0A6N4CZH7	GTPase Obg (EC 3.6.5.-) (GTP-binding protein Obg)	obgE cgtA obg yhbZ ASJ32_00305 GO994_17375	OTHER	Cytoplasmic	S	An essential GTPase which binds GTP, GDP and possibly (p)ppGpp with moderate affinity, with high nucleotide exchange rates and a fairly low GTP hydrolysis rate. Plays a role in control of the cell cycle, stress response, ribosome biogenesis and in those bacteria that undergo differentiation, in morphogenesis control	Chromosome	27.5925	27.0292	25.8418	27.3104	43	43	43	79	79	79	43.847	0	323.31	7068000000	1725	A0A6N4CZH7	A0A6N4CZH7
A0A6N4CZH8	Chemotaxis protein CheX (DUF3334 family protein)	ASJ32_00165 GO994_17515	OTHER	Unknown	NT	Protein of unknown function (DUF3334)	Chromosome	26.4799	25.808	26.679	26.7477	18	18	18	79.3	79.3	79.3	25.411	0	323.31	6010200000	1509	A0A6N4CZH8	A0A6N4CZH8
A0A6N4CZH9	50S ribosomal protein L29	rpmC ASJ32_10945 GO994_01185	OTHER	Cytoplasmic	J	Belongs to the universal ribosomal protein uL29 family	Chromosome	28.2056	27.6802	29.3837	30.8344	12	12	12	92.1	92.1	92.1	7.1942	0	323.31	11469000000	1934	A0A6N4CZH9	A0A6N4CZH9
A0A6N4CZI0	MarR family transcriptional regulator	ASJ32_02980 GO994_09135	OTHER	Cytoplasmic	K	transcriptional	Chromosome	28.008	27.5431	25.9377	NaN	5	5	5	35.6	35.6	35.6	17.547	0.0014749	2.5544	3136600000	52	A0A6N4CZI0	A0A6N4CZI0
A0A6N4CZI1	Glycerol-3-phosphate dehydrogenase (EC 1.1.5.3)	glpD ASJ32_02440 GO994_09710	OTHER	Cytoplasmic	C	Belongs to the FAD-dependent glycerol-3-phosphate dehydrogenase family	Chromosome	21.3238	21.0975	21.8184	21.6677	36	36	36	71.3	71.3	71.3	55.967	0	323.31	409350000	355	A0A6N4CZI1	A0A6N4CZI1
A0A6N4CZI6	Polyphosphate glucokinase (ROK family protein)	ASJ32_00230 GO994_17450	OTHER	Cytoplasmic	GK	ROK family	Chromosome	23.5426	23.7217	23.408	22.9073	15	15	15	69.9	69.9	69.9	26.535	0	296.93	366260000	270	A0A6N4CZI6	A0A6N4CZI6
A0A6N4CZJ1	ATP synthase subunit delta (ATP synthase F(1) sector subunit delta) (F-type ATPase subunit delta) (F-ATPase subunit delta)	atpH ASJ32_09780 GO994_22065	OTHER	Cytoplasmic	C	F(1)F(0) ATP synthase produces ATP from ADP in the presence of a proton or sodium gradient. F-type ATPases consist of two structural domains, F(1) containing the extramembraneous catalytic core and F(0) containing the membrane proton channel, linked together by a central stalk and a peripheral stalk. During catalysis, ATP synthesis in the catalytic domain of F(1) is coupled via a rotary mechanism…	Chromosome	24.9135	23.4998	24.5869	25.8429	11	11	11	55.9	55.9	55.9	19.073	0	73.396	865190000	331	A0A6N4CZJ1	A0A6N4CZJ1
A0A6N4CZJ4	50S ribosomal protein L15	rplO ASJ32_10995 GO994_01240	OTHER	Cytoplasmic	J	Binds to the 23S rRNA	Chromosome	28.4402	28.4717	28.4417	29.7639	32	32	32	95.2	95.2	95.2	15.048	0	323.31	77863000000	8104	A0A6N4CZJ4	A0A6N4CZJ4
A0A6N4CZJ5	Glutamine--tRNA ligase (EC 6.1.1.18) (Glutaminyl-tRNA synthetase) (GlnRS)	glnS ASJ32_03030 GO994_09085	OTHER	Cytoplasmic	J	tRNA synthetases class I (E and Q), anti-codon binding domain	Chromosome	27.7809	28.185	27.6098	27.3803	75	75	75	82.6	82.6	82.6	63.276	0	323.31	7410600000	3697	A0A6N4CZJ5	A0A6N4CZJ5
A0A6N4CZK6	DeoR family transcriptional regulator (XRE family transcriptional regulator)	ASJ32_09830 GO994_22015	OTHER	Cytoplasmic	K	DeoR C terminal sensor domain	Chromosome	22.7095	22.9161	24.0966	23.0937	14	14	14	79.4	79.4	79.4	28.184	0	52.926	73694000	76	A0A6N4CZK6	A0A6N4CZK6
A0A6N4CZK7	Outer membrane protein assembly factor BamC	bamC ASJ32_00135	LIPO(Sec/SPII)	OuterMembrane	M	Part of the outer membrane protein assembly complex, which is involved in assembly and insertion of beta-barrel proteins into the outer membrane	Chromosome	25.6544	25.96	25.6601	26.2443	32	32	32	79.7	79.7	79.7	40.513	0	323.31	25657000000	4443	A0A6N4CZK7	A0A6N4CZK7
A0A6N4CZL1	Uncharacterized protein	ASJ32_00600 GO994_06045	OTHER	Periplasmic	S	COG2207 AraC-type DNA-binding domain-containing proteins	Chromosome	25.0974	24.9599	26.0689	25.1916	10	10	10	67.5	67.5	67.5	24.956	0	323.31	762160000	257	A0A6N4CZL1	A0A6N4CZL1
A0A6N4CZL9	MliC domain-containing protein	ASJ32_00525 GO994_17155	LIPO(Sec/SPII)	Unknown	O	Periplasmic Protein	Chromosome	22.016	22.0092	22.4237	22.8405	12	12	12	41.8	41.8	41.8	10.982	0	323.31	7539800000	1168	A0A6N4CZL9	A0A6N4CZL9
A0A6N4CZM2	Acyl-CoA thioesterase	ASJ32_02870	OTHER	Cytoplasmic	I	Thioesterase superfamily	Chromosome	23.498	24.0584	23.2822	NaN	8	8	8	47.8	47.8	47.8	15.246	0	52.519	123530000	76	A0A6N4CZM2	A0A6N4CZM2
A0A6N4CZN7	Ribosomal RNA small subunit methyltransferase A (EC 2.1.1.182) (16S rRNA (adenine(1518)-N(6)/adenine(1519)-N(6))-dimethyltransferase) (16S rRNA dimethyladenosine transferase) (16S rRNA dimethylase) (S-adenosylmethionine-6-N', N'-adenosyl(rRNA) dimethyltransferase)	rsmA ksgA ASJ32_00360	OTHER	Cytoplasmic	J	Specifically dimethylates two adjacent adenosines (A1518 and A1519) in the loop of a conserved hairpin near the 3'-end of 16S rRNA in the 30S particle. May play a critical role in biogenesis of 30S subunits	Chromosome	25.1992	24.7451	25.3027	26.4744	21	21	21	74.8	74.8	74.8	30.115	0	193.25	4059500000	793	A0A6N4CZN7	A0A6N4CZN7
A0A6N4CZP5	Phosphate acetyltransferase (EC 2.3.1.8) (Phosphotransacetylase)	ASJ32_00100	SP(Sec/SPI)	Cytoplasmic	C	belongs to the CobB CobQ family	Chromosome	28.3365	28.1499	28.9262	28.6486	81	81	81	80.8	80.8	80.8	77.621	0	323.31	33836000000	7097	A0A6N4CZP5	A0A6N4CZP5
A0A6N4CZP7	Sulfurtransferase	ASJ32_02015 GO994_10155	OTHER	Cytoplasmic	P	Rhodanese Homology Domain	Chromosome	23.0891	22.6757	23.3506	23.6626	13	13	13	95.1	95.1	95.1	13.982	0	233.31	720350000	543	A0A6N4CZP7	A0A6N4CZP7
A0A6N4CZQ6	UDP-glucose 4-epimerase (EC 5.1.3.2)	ASJ32_01010	OTHER	Cytoplasmic	M	UDP-glucose 4-epimerase	Chromosome	23.3477	24.2537	24.3048	24.0464	24	24	24	82.7	82.7	82.7	37.099	0	323.31	1059700000	518	A0A6N4CZQ6	A0A6N4CZQ6
A0A6N4CZQ9	Lytic transglycosylase	ASJ32_02860	LIPO(Sec/SPII)	OuterMembrane	M	Transglycosylase SLT domain	Chromosome	20.6793	NaN	21.1527	20.6756	31	31	31	69.5	69.5	69.5	58	0	323.31	556620000	493	A0A6N4CZQ9	A0A6N4CZQ9
A0A6N4CZR7	DNA-binding protein (YheV family putative metal-binding protein)	ASJ32_00605 GO994_06050	OTHER	Unknown	S	Probable metal-binding protein (DUF2387)	Chromosome	21.9359	21.4719	23.128	22.9009	3	3	3	67.6	67.6	67.6	7.6959	0	40.733	89422000	82	A0A6N4CZR7	A0A6N4CZR7
A0A6N4CZS2	MerR family transcriptional regulator	ASJ32_00940 GO994_06445	OTHER	Cytoplasmic	K	helix_turn_helix, mercury resistance	Chromosome	22.8907	23.546	NaN	22.3155	11	11	11	33.8	33.8	33.8	33.742	0	30.097	181650000	124	A0A6N4CZS2	A0A6N4CZS2
A0A6N4CZS4	tRNA sulfurtransferase (EC 2.8.1.4) (Sulfur carrier protein ThiS sulfurtransferase) (Thiamine biosynthesis protein ThiI) (tRNA 4-thiouridine synthase)	thiI ASJ32_02235	OTHER	Cytoplasmic	H	Catalyzes the ATP-dependent transfer of a sulfur to tRNA to produce 4-thiouridine in position 8 of tRNAs, which functions as a near-UV photosensor. Also catalyzes the transfer of sulfur to the sulfur carrier protein ThiS, forming ThiS-thiocarboxylate. This is a step in the synthesis of thiazole, in the thiamine biosynthesis pathway. The sulfur is donated as persulfide by IscS	Chromosome	26.1366	25.5857	25.1144	25.6799	48	48	48	78.6	78.6	78.6	54.714	0	323.31	9043800000	2649	A0A6N4CZS4	A0A6N4CZS4
A0A6N4CZS8	Preprotein translocase subunit Tim44	ASJ32_00660	SP(Sec/SPI)	CytoplasmicMembrane	S	import inner membrane translocase subunit Tim44	Chromosome	22.8297	22.346	22.6601	21.5632	21	21	21	52.9	52.9	52.9	30.538	0	323.31	3218100000	977	A0A6N4CZS8	A0A6N4CZS8
A0A6N4CZT4	ABC transporter (sn-glycerol-3-phosphate ABC transporter ATP-binding protein UgpC)	ugpC ASJ32_02350 GO994_09805	OTHER	CytoplasmicMembrane	P	Belongs to the ABC transporter superfamily	Chromosome	22.1599	22.2256	22.9423	23.4415	23	23	23	59.8	59.8	59.8	41.94	0	129.32	514230000	247	A0A6N4CZT4	A0A6N4CZT4
A0A6N4CZT5	Cysteine desulfurase	ASJ32_00735	OTHER	Cytoplasmic	E	Catalyzes the removal of elemental sulfur and selenium atoms from L-cysteine, L-cystine, L-selenocysteine, and L- selenocystine to produce L-alanine	Chromosome	23.3209	23.7071	23.9471	22.3101	22	22	22	64.4	64.4	64.4	44.528	0	154.11	489500000	237	A0A6N4CZT5	A0A6N4CZT5
A0A6N4CZT6	UPF0234 protein ASJ32_01055	ASJ32_01055 GO994_06565	OTHER	Cytoplasmic	S	Belongs to the UPF0234 family	Chromosome	26.3771	25.8262	26.7656	26.7144	23	23	23	85	85	85	18.192	0	323.31	1937100000	862	A0A6N4CZT6	A0A6N4CZT6
A0A6N4CZT8	Ferric uptake regulation protein	fur ASJ32_03025 GO994_09090	OTHER	Cytoplasmic	K	Belongs to the Fur family	Chromosome	27.0485	27.1416	26.6613	26.9107	21	21	21	100	100	100	16.211	0	323.31	3403000000	1056	A0A6N4CZT8	A0A6N4CZT8
A0A6N4CZU6	UPF0325 protein ASJ32_01270	ASJ32_01270 GO994_06780	OTHER	Cytoplasmic	S	Protein of unknown function (DUF3461)	Chromosome	22.7139	22.9924	NaN	24.2197	9	9	9	66.1	66.1	66.1	14.98	0	108.48	229250000	158	A0A6N4CZU6	A0A6N4CZU6
A0A6N4CZU9	DeoR/GlpR family transcriptional regulator (Transcriptional regulator)	ASJ32_02450 GO994_09700	OTHER	Cytoplasmic	K	helix_turn_helix, Deoxyribose operon repressor	Chromosome	24.7626	24.9367	25.6541	25.5216	22	22	22	76.2	76.2	76.2	28.162	0	319.82	653510000	372	A0A6N4CZU9	A0A6N4CZU9
A0A6N4CZV0	LPS-assembly protein LptD	lptD ASJ32_00375	SP(Sec/SPI)	OuterMembrane	M	Together with LptE, is involved in the assembly of lipopolysaccharide (LPS) at the surface of the outer membrane	Chromosome	20.8458	20.766	21.3005	22.0736	72	72	72	71.7	71.7	71.7	92.194	0	323.31	13706000000	6913	A0A6N4CZV0	A0A6N4CZV0
A0A6N4CZV7	NADPH-dependent 7-cyano-7-deazaguanine reductase (EC 1.7.1.13) (7-cyano-7-carbaguanine reductase) (NADPH-dependent nitrile oxidoreductase) (PreQ(0) reductase)	queF ASJ32_01205	OTHER	Cytoplasmic	S	Catalyzes the NADPH-dependent reduction of 7-cyano-7- deazaguanine (preQ0) to 7-aminomethyl-7-deazaguanine (preQ1)	Chromosome	25.405	25.6211	24.7228	25.3061	16	16	16	54.6	54.6	54.6	31.607	0	315.94	564870000	269	A0A6N4CZV7	A0A6N4CZV7
A0A6N4CZW0	Bifunctional chorismate mutase/prephenate dehydratase (EC 4.2.1.51) (EC 5.4.99.5) (Chorismate mutase) (Chorismate mutase-prephenate dehydratase) (Prephenate dehydratase) (p-protein)	pheA ASJ32_00905	OTHER	Cytoplasmic	E	chorismate mutase	Chromosome	26.9484	25.8337	26.9725	26.4883	35	35	35	61.3	61.3	61.3	43.258	0	323.31	4929000000	1582	A0A6N4CZW0	A0A6N4CZW0
A0A6N4CZW1	Channel protein TolC (TolC family outer membrane protein)	ASJ32_10305 GO994_08170	SP(Sec/SPI)	OuterMembrane	MU	type I secretion outer membrane protein, TolC	Chromosome	27.1276	27.4201	27.9509	27.7253	96	96	96	91.4	91.4	91.4	49.03	0	323.31	206730000000	30657	A0A6N4CZW1	A0A6N4CZW1
A0A6N4CZW6	SAM-dependent methyltransferase	ASJ32_00510 GO994_17170	OTHER	Cytoplasmic	H	trans-aconitate 2-methyltransferase activity	Chromosome	26.0488	24.818	24.8674	25.6312	21	21	21	81.6	81.6	81.6	29.842	0	323.31	2315600000	873	A0A6N4CZW6	A0A6N4CZW6
A0A6N4CZW9	Acetolactate synthase (EC 2.2.1.6)	ilvH ilvN ASJ32_00095 GO994_17585	OTHER	Cytoplasmic	E	Acetolactate synthase small	Chromosome	26.9345	27.0667	27.9021	27.05	29	29	29	97.6	97.6	97.6	18.109	0	323.31	6244200000	1396	A0A6N4CZW9	A0A6N4CZW9
A0A6N4CZX2	Immunogenic protein	ASJ32_01500	SP(Sec/SPI)	Extracellular	S	NMT1-like family	Chromosome	23.7845	23.3703	24.1628	23.5492	16	16	16	37.4	37.4	37.4	45.482	0	40.942	224250000	178	A0A6N4CZX2	A0A6N4CZX2
A0A6N4CZX6	Oligopeptide ABC transporter substrate-binding protein OppA (Peptide ABC transporter substrate-binding protein)	ASJ32_10165 GO994_08325	SP(Sec/SPI)	Periplasmic	E	Bacterial extracellular solute-binding proteins, family 5 Middle	Chromosome	27.4478	27.851	27.4025	26.6608	90	90	90	91.1	91.1	91.1	60.697	0	323.31	16645000000	5347	A0A6N4CZX6	A0A6N4CZX6
A0A6N4CZY0	Short-chain dehydrogenase	ASJ32_00145 GO994_17535	OTHER	Cytoplasmic	IQ	COG1028 Dehydrogenases with different specificities (related to short-chain alcohol dehydrogenases)	Chromosome	20.7154	20.2117	22.2408	NaN	5	5	5	36	36	36	21.056	0.0004268	22.474	19624000	24	A0A6N4CZY0	A0A6N4CZY0
A0A6N4CZY2	Thioredoxin domain-containing protein	ASJ32_01015	SP(Sec/SPI)	Unknown	O	DSBA-like thioredoxin domain	Chromosome	28.6106	28.6893	28.7205	28.6454	37	37	37	83.9	83.9	83.9	27.316	0	323.31	13692000000	2564	A0A6N4CZY2	A0A6N4CZY2
A0A6N4CZY3	Molybdate ABC transporter substrate-binding protein	modA ASJ32_02715 GO994_09420	SP(Sec/SPI)	Periplasmic	P	Bacterial extracellular solute-binding protein	Chromosome	21.3143	21.9769	22.4387	NaN	13	13	13	49.6	49.6	49.6	25.231	0	134.07	163680000	132	A0A6N4CZY3	A0A6N4CZY3
A0A6N4CZY7	Peptidase M13	ASJ32_01430	LIPO(Sec/SPII)	Unknown	O	peptidase, M13	Chromosome	23.4879	23.2207	24.0655	24.1784	75	75	75	73.8	73.8	73.8	75.317	0	323.31	11470000000	3781	A0A6N4CZY7	A0A6N4CZY7
A0A6N4CZY8	Lipoprotein	metQ ASJ32_00210 GO994_17470	LIPO(Sec/SPII)	CytoplasmicMembrane	P	Belongs to the nlpA lipoprotein family	Chromosome	25.5897	25.5312	26.0719	26.6317	38	38	38	74.1	74.1	74.1	28.506	0	323.31	58728000000	10902	A0A6N4CZY8	A0A6N4CZY8
A0A6N4CZZ3	DNA-directed RNA polymerase subunit omega (RNAP omega subunit) (EC 2.7.7.6) (RNA polymerase omega subunit) (Transcriptase subunit omega)	rpoZ ASJ32_09430 GO994_00185	OTHER	Cytoplasmic	K	Promotes RNA polymerase assembly. Latches the N- and C- terminal regions of the beta' subunit thereby facilitating its interaction with the beta and alpha subunits	Chromosome	24.5673	24.4674	24.1173	24.8269	9	9	9	96.7	96.7	96.7	10.015	0	75.976	495660000	156	A0A6N4CZZ3	A0A6N4CZZ3
A0A6N4CZZ5	RNA-binding protein Hfq	hfq ASJ32_00265 GO994_17415	OTHER	Cytoplasmic	J	RNA chaperone that binds small regulatory RNA (sRNAs) and mRNAs to facilitate mRNA translational regulation in response to envelope stress, environmental stress and changes in metabolite concentrations. Also binds with high specificity to tRNAs	Chromosome	25.9548	25.5954	25.0174	25.6485	10	10	10	100	100	100	9.5919	0	273.45	2299800000	873	A0A6N4CZZ5	A0A6N4CZZ5
A0A6N4CZZ6	Kinase inhibitor	ASJ32_01485	SP(Sec/SPI)	Periplasmic	S	PFAM PEBP family protein	Chromosome	25.2074	25.7038	26.4495	25.5181	5	5	5	36	36	36	18.883	0	57.028	265990000	47	A0A6N4CZZ6	A0A6N4CZZ6
A0A6N4CZZ7	Peptidyl-prolyl cis-trans isomerase (PPIase) (EC 5.2.1.8)	ASJ32_01075 GO994_06585	SP(Sec/SPI)	Unknown	M	PPIases accelerate the folding of proteins. It catalyzes the cis-trans isomerization of proline imidic peptide bonds in oligopeptides	Chromosome	25.4582	25.112	25.8781	25.6342	15	15	15	68.9	68.9	68.9	20.032	0	323.31	1905500000	695	A0A6N4CZZ7	A0A6N4CZZ7
A0A6N4CZZ9	Phosphoheptose isomerase (EC 5.3.1.28) (Sedoheptulose 7-phosphate isomerase)	gmhA ASJ32_02820	OTHER	Cytoplasmic	G	Catalyzes the isomerization of sedoheptulose 7-phosphate in D-glycero-D-manno-heptose 7-phosphate	Chromosome	26.185	26.1732	26.6146	25.1875	23	23	23	97.9	97.9	97.9	20.837	0	323.31	3993300000	1069	A0A6N4CZZ9	A0A6N4CZZ9
A0A6N4D005	DNA topoisomerase 1 (EC 5.6.2.1) (DNA topoisomerase I)	topA ASJ32_01535	OTHER	Cytoplasmic	L	Releases the supercoiling and torsional tension of DNA, which is introduced during the DNA replication and transcription, by transiently cleaving and rejoining one strand of the DNA duplex. Introduces a single-strand break via transesterification at a target site in duplex DNA. The scissile phosphodiester is attacked by the catalytic tyrosine of the enzyme, resulting in the formation of a DNA-(5'…	Chromosome	25.9159	25.5793	26.0575	26.2518	128	128	128	93.7	93.7	93.7	96.99	0	323.31	22172000000	7436	A0A6N4D005	A0A6N4D005
A0A6N4D006	Na(+)-translocating NADH-quinone reductase subunit F (Na(+)-NQR subunit F) (Na(+)-translocating NQR subunit F) (EC 7.2.1.1) (NQR complex subunit F) (NQR-1 subunit F)	nqrF ASJ32_01125 GO994_06635	OTHER	Cytoplasmic	C	NQR complex catalyzes the reduction of ubiquinone-1 to ubiquinol by two successive reactions, coupled with the transport of Na( ) ions from the cytoplasm to the periplasm. The first step is catalyzed by NqrF, which accepts electrons from NADH and reduces ubiquinone-1 to ubisemiquinone by a one-electron transfer pathway	Chromosome	23.1991	23.5863	24.0077	24.236	44	44	44	78.6	78.6	78.6	44.912	0	323.31	13709000000	3105	A0A6N4D006	A0A6N4D006
A0A6N4D011	Chaperone SurA (Peptidyl-prolyl cis-trans isomerase SurA) (PPIase SurA) (EC 5.2.1.8) (Rotamase SurA)	surA ASJ32_00370 GO994_17310	SP(Sec/SPI)	Periplasmic	M	Chaperone involved in the correct folding and assembly of outer membrane proteins. Recognizes specific patterns of aromatic residues and the orientation of their side chains, which are found more frequently in integral outer membrane proteins. May act in both early periplasmic and late outer membrane-associated steps of protein maturation	Chromosome	27.7017	28.1076	27.9952	27.2654	76	76	76	91.4	91.4	91.4	47.903	0	323.31	14299000000	4066	A0A6N4D011	A0A6N4D011
A0A6N4D037	Beta-N-acetylhexosaminidase (EC 3.2.1.52) (N-acetyl-beta-glucosaminidase)	ASJ32_03035	SP(Sec/SPI)	Unknown	G	COG3525 N-acetyl-beta-hexosaminidase	Chromosome	24.4367	23.6743	24.8621	24.4118	74	74	74	75.9	75.9	75.9	96.941	0	323.31	1605500000	910	A0A6N4D037	A0A6N4D037
A0A6N4D040	ATP synthase subunit alpha (EC 7.1.2.2) (ATP synthase F1 sector subunit alpha) (F-ATPase subunit alpha)	atpA ASJ32_09785 GO994_22060	OTHER	Cytoplasmic	C	Produces ATP from ADP in the presence of a proton gradient across the membrane. The alpha chain is a regulatory subunit	Chromosome	30.3008	30.2457	30.3083	30.6429	82	82	82	90.1	90.1	90.1	55.208	0	323.31	97396000000	14047	A0A6N4D040	A0A6N4D040
A0A6N4D043	Outer membrane protein assembly factor BamA	bamA ASJ32_01330	SP(Sec/SPI)	OuterMembrane	M	Part of the outer membrane protein assembly complex, which is involved in assembly and insertion of beta-barrel proteins into the outer membrane	Chromosome	22.3525	22.3591	23.5225	23.0995	105	105	105	84.9	84.9	84.9	89.657	0	323.31	25746000000	11369	A0A6N4D043	A0A6N4D043
A0A6N4D049	Alanine racemase (EC 5.1.1.1)	alr ASJ32_00670 GO994_06125	OTHER	Cytoplasmic	M	Catalyzes the interconversion of L-alanine and D- alanine. May also act on other amino acids	Chromosome	24.5034	24.7458	24.9897	24.0619	28	28	28	64.7	64.7	64.7	38.741	0	323.31	986960000	750	A0A6N4D049	A0A6N4D049
A0A6N4D050	Lytic transglycosylase	ASJ32_02885	SP(Sec/SPI)	Periplasmic	M	Soluble lytic murein transglycosylase	Chromosome	21.8923	20.7017	NaN	23.5701	52	52	52	73.5	73.5	73.5	73.681	0	323.31	773020000	555	A0A6N4D050	A0A6N4D050
A0A6N4D051	BolA family transcriptional regulator	ASJ32_01090	OTHER	Unknown	T	Belongs to the BolA IbaG family	Chromosome	21.8965	22.7114	NaN	21.751	5	5	5	61.3	61.3	61.3	11.743	0.00040733	14.3	60136000	48	A0A6N4D051	A0A6N4D051
A0A6N4D052	LysR family transcriptional regulator	ASJ32_01400 GO994_06910	OTHER	Cytoplasmic	K	LysR substrate binding domain	Chromosome	23.1247	23.4674	24.3346	24.2608	11	11	11	42.4	42.4	42.4	33.489	0	200.06	219220000	158	A0A6N4D052	A0A6N4D052
A0A6N4D056	3-isopropylmalate dehydratase small subunit (EC 4.2.1.33) (Alpha-IPM isomerase) (IPMI) (Isopropylmalate isomerase)	leuD ASJ32_00055	OTHER	Cytoplasmic	E	Catalyzes the isomerization between 2-isopropylmalate and 3-isopropylmalate, via the formation of 2-isopropylmaleate	Chromosome	24.9318	24.689	25.1289	24.6461	18	18	18	86.9	86.9	86.9	22.181	0	252.26	1410400000	621	A0A6N4D056	A0A6N4D056
A0A6N4D064	AMP nucleosidase (EC 3.2.2.4)	ASJ32_01190 GO994_06700	OTHER	Cytoplasmic	S	Possible lysine decarboxylase	Chromosome	26.5904	27.0402	26.9289	26.242	52	52	52	83.1	83.1	83.1	50.244	0	323.31	7667800000	2482	A0A6N4D064	A0A6N4D064
A0A6N4D066	Acetate kinase (EC 2.7.2.1) (Acetokinase)	ackA ASJ32_00105 GO994_17575	OTHER	Cytoplasmic	H	Catalyzes the formation of acetyl phosphate from acetate and ATP. Can also catalyze the reverse reaction	Chromosome	28.0552	28.5058	27.788	27.9237	45	45	44	99	99	96.8	43.023	0	323.31	13583000000	3333	A0A6N4D066	A0A6N4D066
A0A6N4D067	Aspartate aminotransferase	ASJ32_01505	OTHER	Cytoplasmic	E	Aminotransferase class I and II	Chromosome	25.9861	26.4866	25.5393	25.5644	31	31	31	67.5	67.5	67.5	41.964	0	323.31	3294500000	1006	A0A6N4D067	A0A6N4D067
A0A6N4D070	Peptide methionine sulfoxide reductase MsrA (Protein-methionine-S-oxide reductase) (EC 1.8.4.11) (Peptide-methionine (S)-S-oxide reductase) (Peptide Met(O) reductase)	msrA ASJ32_01810	OTHER	Unknown	O	Has an important function as a repair enzyme for proteins that have been inactivated by oxidation. Catalyzes the reversible oxidation-reduction of methionine sulfoxide in proteins to methionine	Chromosome	26.1668	25.948	26.1777	26.4149	9	9	9	69	69	69	23.133	0	292.28	2687900000	563	A0A6N4D070	A0A6N4D070
A0A6N4D075	Peptidase M3	ASJ32_01860	OTHER	Cytoplasmic	E	COG1164 Oligoendopeptidase F	Chromosome	23.9447	24.1641	24.5931	24.3651	43	43	43	67.3	67.3	67.3	67.208	0	323.31	1917100000	948	A0A6N4D075	A0A6N4D075
A0A6N4D079	4-hydroxy-3-methylbut-2-en-1-yl diphosphate synthase (flavodoxin) (EC 1.17.7.3) (1-hydroxy-2-methyl-2-(E)-butenyl 4-diphosphate synthase)	ispG ASJ32_01915	OTHER	Cytoplasmic	I	Converts 2C-methyl-D-erythritol 2,4-cyclodiphosphate (ME-2,4cPP) into 1-hydroxy-2-methyl-2-(E)-butenyl 4-diphosphate	Chromosome	23.0072	21.5482	22.0045	22.8538	46	46	46	89.5	89.5	89.5	40.388	0	323.31	1954700000	888	A0A6N4D079	A0A6N4D079
A0A6N4D081	Elongation factor Ts (EF-Ts)	tsf ASJ32_01295 GO994_06805	OTHER	Cytoplasmic	J	Associates with the EF-Tu.GDP complex and induces the exchange of GDP to GTP. It remains bound to the aminoacyl-tRNA.EF- Tu.GTP complex up to the GTP hydrolysis stage on the ribosome	Chromosome	29.945	30.0307	29.7942	29.6994	58	58	58	96.9	96.9	96.9	31.159	0	323.31	80288000000	12281	A0A6N4D081	A0A6N4D081
A0A6N4D084	Methionine import ATP-binding protein MetN (EC 7.4.2.11)	metN ASJ32_00220	OTHER	CytoplasmicMembrane	P	Part of the ABC transporter complex MetNIQ involved in methionine import. Responsible for energy coupling to the transport system	Chromosome	22.287	21.08	21.9592	22.9396	20	20	20	59.9	59.9	59.9	37.849	0	323.31	2319900000	689	A0A6N4D084	A0A6N4D084
A0A6N4D088	Lipid-A-disaccharide synthase (EC 2.4.1.182)	lpxB ASJ32_01355 GO994_06865	OTHER	Cytoplasmic	M	Condensation of UDP-2,3-diacylglucosamine and 2,3- diacylglucosamine-1-phosphate to form lipid A disaccharide, a precursor of lipid A, a phosphorylated glycolipid that anchors the lipopolysaccharide to the outer membrane of the cell	Chromosome	21.6575	21.2017	NaN	22.0237	27	27	27	75.7	75.7	75.7	42.034	0	323.31	1711900000	712	A0A6N4D088	A0A6N4D088
A0A6N4D089	Iron-binding protein IscA (Iron-sulfur cluster assembly protein)	iscA ASJ32_01965 GO994_10205	OTHER	Cytoplasmic	C	Is able to transfer iron-sulfur clusters to apo- ferredoxin. Multiple cycles of 2Fe2S cluster formation and transfer are observed, suggesting that IscA acts catalytically. Recruits intracellular free iron so as to provide iron for the assembly of transient iron-sulfur cluster in IscU in the presence of IscS, L-cysteine and the thioredoxin reductase system	Chromosome	25.6483	25.4067	26.8162	26.1035	10	10	10	57.9	57.9	57.9	11.42	0	278.45	1944000000	380	A0A6N4D089	A0A6N4D089
A0A6N4D092	Protein HflK	hflK ASJ32_00275 GO994_17405	OTHER	Unknown	O	HflC and HflK could encode or regulate a protease	Chromosome	22.7798	22.1715	23.5658	24.6575	62	62	62	91.4	91.4	91.4	42.48	0	323.31	70329000000	8451	A0A6N4D092	A0A6N4D092
A0A6N4D096	UDP-3-O-acylglucosamine N-acyltransferase (EC 2.3.1.-)	lpxD ASJ32_01340	OTHER	Cytoplasmic	M	Catalyzes the N-acylation of UDP-3-O-acylglucosamine using 3-hydroxyacyl-ACP as the acyl donor. Is involved in the biosynthesis of lipid A, a phosphorylated glycolipid that anchors the lipopolysaccharide to the outer membrane of the cell	Chromosome	24.8886	24.7422	24.7663	24.407	27	27	27	72	72	72	36.325	0	323.31	3041500000	1022	A0A6N4D096	A0A6N4D096
A0A6N4D097	LysR family transcriptional regulator (Transcriptional regulator)	ASJ32_01030 GO994_06540	OTHER	Cytoplasmic	K	LysR substrate binding domain	Chromosome	21.7892	21.3885	22.9307	22.4926	12	12	12	50.5	50.5	50.5	33.447	0	323.31	364670000	221	A0A6N4D097	A0A6N4D097
A0A6N4D0A2	Glycine dehydrogenase (decarboxylating) (EC 1.4.4.2) (Glycine cleavage system P-protein) (Glycine decarboxylase) (Glycine dehydrogenase (aminomethyl-transferring))	gcvP ASJ32_02070 GO994_10100	OTHER	Cytoplasmic	E	The glycine cleavage system catalyzes the degradation of glycine. The P protein binds the alpha-amino group of glycine through its pyridoxal phosphate cofactor	Chromosome	27.5155	27.8246	27.7	27.0631	85	85	85	78.2	78.2	78.2	103.49	0	323.31	8678900000	5224	A0A6N4D0A2	A0A6N4D0A2
A0A6N4D0A3	Ribosomal RNA large subunit methyltransferase G (EC 2.1.1.174) (23S rRNA m2G1835 methyltransferase) (rRNA (guanine-N(2)-)-methyltransferase RlmG)	rlmG ASJ32_01085	OTHER	Cytoplasmic	J	Specifically methylates the guanine in position 1835 (m2G1835) of 23S rRNA	Chromosome	23.2946	23.263	23.3922	23.8233	17	17	17	51.5	51.5	51.5	41.548	0	323.31	1078200000	663	A0A6N4D0A3	A0A6N4D0A3
A0A6N4D0A7	Glutathione S-transferase	ASJ32_01470 GO994_07000	OTHER	Unknown	O	Glutathione S-Transferase	Chromosome	22.1703	21.5416	22.6246	21.1171	14	14	14	69.7	69.7	69.7	23.009	0	155.66	519500000	194	A0A6N4D0A7	A0A6N4D0A7
A0A6N4D0B0	Peptide ABC transporter ATP-binding protein	ASJ32_02125	OTHER	CytoplasmicMembrane	P	ATPases associated with a variety of cellular activities	Chromosome	23.5699	24.3581	24.9474	25.0446	37	37	37	76.9	76.9	76.9	51.596	0	323.31	2436100000	828	A0A6N4D0B0	A0A6N4D0B0
A0A6N4D0B2	Aminoglycoside phosphotransferase (Phosphotransferase)	ASJ32_00380 GO994_17300	OTHER	Unknown	S	Phosphotransferase enzyme family	Chromosome	22.1542	21.4575	21.6369	21.6527	16	16	16	51.9	51.9	51.9	37.228	0	108.19	254500000	189	A0A6N4D0B2	A0A6N4D0B2
A0A6N4D0B4	NAD(P)-dependent oxidoreductase	ASJ32_01520	OTHER	Cytoplasmic	IQ	Fungal family of unknown function (DUF1776)	Chromosome	25.1187	24.5571	25.1622	25.7625	24	24	24	78.5	78.5	78.5	27.265	0	323.31	1721300000	479	A0A6N4D0B4	A0A6N4D0B4
A0A6N4D0C6	DUF3549 family protein	ASJ32_01235 GO994_06745	OTHER	Unknown	S	Protein of unknown function (DUF3549)	Chromosome	24.9511	22.5185	23.4653	25.2125	16	16	16	53.5	53.5	53.5	38.31	0	323.31	851410000	498	A0A6N4D0C6	A0A6N4D0C6
A0A6N4D0C7	Crp/Fnr family transcriptional regulator (cAMP-activated global transcriptional regulator CRP)	crp ASJ32_00515 GO994_17165	OTHER	Cytoplasmic	K	helix_turn_helix, cAMP Regulatory protein	Chromosome	25.8934	24.6053	25.2935	25.6652	24	24	24	66	66	66	23.784	0	323.31	4845500000	1390	A0A6N4D0C7	A0A6N4D0C7
A0A6N4D0D4	UDP-4-amino-4-deoxy-L-arabinose--oxoglutarate aminotransferase (EC 2.6.1.87) (UDP-(beta-L-threo-pentapyranosyl-4''-ulose diphosphate) aminotransferase) (UDP-Ara4O aminotransferase) (UDP-4-amino-4-deoxy-L-arabinose aminotransferase)	arnB ASJ32_00570	OTHER	Cytoplasmic	M	Catalyzes the conversion of UDP-4-keto-arabinose (UDP- Ara4O) to UDP-4-amino-4-deoxy-L-arabinose (UDP-L-Ara4N). The modified arabinose is attached to lipid A and is required for resistance to polymyxin and cationic antimicrobial peptides	Chromosome	26.5237	26.5665	22.6498	25.1412	29	29	29	68.8	68.8	68.8	41.452	0	323.31	4889700000	1321	A0A6N4D0D4	A0A6N4D0D4
A0A6N4D0D5	30S ribosomal protein S2	rpsB ASJ32_01290 GO994_06800	OTHER	Cytoplasmic	J	Belongs to the universal ribosomal protein uS2 family	Chromosome	28.7017	28.7465	28.4294	29.3317	44	44	44	98.8	98.8	98.8	26.912	0	323.31	111720000000	18777	A0A6N4D0D5	A0A6N4D0D5
A0A6N4D0E3	DNA polymerase III subunit alpha (EC 2.7.7.7)	dnaE ASJ32_01365	OTHER	Cytoplasmic	L	DNA polymerase III alpha subunit	Chromosome	22.3234	21.6258	23.2448	23.7636	81	81	81	66.4	66.4	66.4	130.18	0	323.31	2464300000	1151	A0A6N4D0E3	A0A6N4D0E3
A0A6N4D0E8	Protease (tRNA 5-hydroxyuridine modification protein YegQ)	ASJ32_00680 GO994_06135	OTHER	Cytoplasmic	O	Peptidase family U32 C-terminal domain	Chromosome	26.308	26.0922	25.7265	26.2917	47	47	47	77	77	77	51.492	0	323.31	4737000000	1639	A0A6N4D0E8	A0A6N4D0E8
A0A6N4D0G4	Uncharacterized protein	ASJ32_00810 GO994_06250	OTHER	Unknown	S	Cupin 2, conserved barrel domain protein	Chromosome	24.9268	25.1254	23.1094	25.5672	6	6	6	93.6	93.6	93.6	12.383	0	69.337	493310000	109	A0A6N4D0G4	A0A6N4D0G4
A0A6N4D0G6	LysR family transcriptional regulator	ASJ32_01515	OTHER	Cytoplasmic	K	Transcriptional regulator	Chromosome	21.8423	NaN	22.2412	22.2762	16	16	16	72.4	72.4	72.4	33.147	0	323.31	227950000	151	A0A6N4D0G6	A0A6N4D0G6
A0A6N4D0G7	Pseudouridine synthase (EC 5.4.99.-)	ASJ32_02560	OTHER	Cytoplasmic	J	Belongs to the pseudouridine synthase RsuA family	Chromosome	26.0369	25.4678	26.8646	26.9233	29	29	29	67.2	67.2	67.2	37.145	0	323.31	2104300000	918	A0A6N4D0G7	A0A6N4D0G7
A0A6N4D0H7	GTP cyclohydrolase 1 (EC 3.5.4.16) (GTP cyclohydrolase I) (GTP-CH-I)	folE ASJ32_02665 GO994_09470	OTHER	Cytoplasmic	H	GTP cyclohydrolase	Chromosome	26.1215	26.2029	26.9982	26.2554	24	24	24	76.1	76.1	76.1	24.064	0	323.31	2298600000	1170	A0A6N4D0H7	A0A6N4D0H7
A0A6N4D0J0	DJ-1 family protein (Oxidative-stress-resistance chaperone)	ASJ32_01045 GO994_06555	OTHER	Cytoplasmic	S	DJ-1/PfpI family	Chromosome	22.6604	22.6407	20.5781	NaN	8	8	8	82.2	82.2	82.2	20.175	0	78.041	145710000	84	A0A6N4D0J0	A0A6N4D0J0
A0A6N4D0J2	Ribonuclease HII (RNase HII) (EC 3.1.26.4)	rnhB ASJ32_01360	OTHER	Cytoplasmic	L	Endonuclease that specifically degrades the RNA of RNA- DNA hybrids	Chromosome	22.5726	22.5629	NaN	22.0521	10	10	10	59	59	59	21.003	0.00041999	19.538	47921000	61	A0A6N4D0J2	A0A6N4D0J2
A0A6N4D0K5	Repressor	ASJ32_02880	OTHER	Cytoplasmic	K	Transcriptional regulator	Chromosome	25.2089	25.2857	25.3783	25.8658	27	27	27	84.6	84.6	84.6	36.243	0	323.31	2979100000	1083	A0A6N4D0K5	A0A6N4D0K5
A0A6N4D0L3	Diguanylate cyclase	ASJ32_01195 GO994_06705	OTHER	CytoplasmicMembrane	T	diguanylate cyclase	Chromosome	26.0687	25.7162	26.0601	25.0058	47	47	47	67.7	67.7	67.7	60.344	0	323.31	2241700000	610	A0A6N4D0L3	A0A6N4D0L3
A0A6N4D0L8	Alpha-D-glucose phosphate-specific phosphoglucomutase (Phosphoglucomutase) (EC 5.4.2.2)	ASJ32_02990 GO994_09125	OTHER	Unknown	G	Phosphoglucomutase	Chromosome	26.9111	26.8784	27.0973	26.8143	58	58	58	92.8	92.8	92.8	59.291	0	323.31	8717600000	2263	A0A6N4D0L8	A0A6N4D0L8
A0A6N4D0P2	3-isopropylmalate dehydratase large subunit (EC 4.2.1.33) (Alpha-IPM isomerase) (IPMI) (Isopropylmalate isomerase)	leuC ASJ32_00060 GO994_17625	OTHER	Cytoplasmic	E	Catalyzes the isomerization between 2-isopropylmalate and 3-isopropylmalate, via the formation of 2-isopropylmaleate	Chromosome	25.4241	25.3414	25.194	25.4662	33	33	33	59.1	59.1	59.1	49.804	0	323.31	2153900000	1225	A0A6N4D0P2	A0A6N4D0P2
A0A6N4D0P8	HIT domain-containing protein (Histidine triad (HIT) protein)	ASJ32_00160 GO994_17520	OTHER	Unknown	FG	HIT domain	Chromosome	21.9444	21.9649	NaN	21.2603	7	7	7	57.2	57.2	57.2	16.271	0	95.177	54188000	55	A0A6N4D0P8	A0A6N4D0P8
A0A6N4D0Q0	Acetyl-coenzyme A carboxylase carboxyl transferase subunit alpha (ACCase subunit alpha) (Acetyl-CoA carboxylase carboxyltransferase subunit alpha) (EC 2.1.3.15)	accA ASJ32_01370 GO994_06880	OTHER	Cytoplasmic	I	Component of the acetyl coenzyme A carboxylase (ACC) complex. First, biotin carboxylase catalyzes the carboxylation of biotin on its carrier protein (BCCP) and then the CO(2) group is transferred by the carboxyltransferase to acetyl-CoA to form malonyl-CoA	Chromosome	26.6424	26.5312	27.4607	27.4862	41	41	41	82	82	82	35.26	0	323.31	13370000000	3553	A0A6N4D0Q0	A0A6N4D0Q0
A0A6N4D0Q9	Protein HflC	hflC ASJ32_00280 GO994_17400	LIPO(Sec/SPII)	Cytoplasmic	O	HflC and HflK could regulate a protease	Chromosome	23.5455	NaN	23.8344	24.2061	72	72	72	88.1	88.1	88.1	33.251	0	323.31	46316000000	8489	A0A6N4D0Q9	A0A6N4D0Q9
A0A6N4D0R3	Luciferase-like monooxygenase	ASJ32_00335 GO994_17345	OTHER	Cytoplasmic	C	Luciferase-like monooxygenase	Chromosome	23.0086	21.1871	21.7895	22.1885	21	21	21	52.3	52.3	52.3	36.057	0	323.31	817320000	464	A0A6N4D0R3	A0A6N4D0R3
A0A6N4D0R9	Uncharacterized protein	ASJ32_00520	OTHER	Unknown	O	OsmC-like protein	Chromosome	25.4185	25.2529	24.8505	24.0347	10	10	10	59.7	59.7	59.7	14.492	0	63.2	616710000	225	A0A6N4D0R9	A0A6N4D0R9
A0A6N4D0S0	Molybdopterin molybdenumtransferase (EC 2.10.1.1)	ASJ32_01635	OTHER	Unknown	H	MoeA N-terminal region (domain I and II)	Chromosome	24.9847	25.223	25.7532	25.6467	23	23	23	53.5	53.5	53.5	61.718	0	323.31	694830000	300	A0A6N4D0S0	A0A6N4D0S0
A0A6N4D0S1	UDP-glucose 6-dehydrogenase (EC 1.1.1.22)	ASJ32_00575 GO994_06005	SP(Sec/SPI)	Cytoplasmic	M	Belongs to the UDP-glucose GDP-mannose dehydrogenase family	Chromosome	25.4765	25.6679	26.0062	25.6676	55	55	55	92.2	92.2	92.2	49.388	0	323.31	12101000000	2961	A0A6N4D0S1	A0A6N4D0S1
A0A6N4D0T0	AAA family ATPase	ASJ32_00630	OTHER	Cytoplasmic	T	Bacterial regulatory protein, Fis family	Chromosome	24.3167	22.267	22.4921	24.0859	35	34	34	66.2	66.2	66.2	51.26	0	323.31	1567200000	650	A0A6N4D0T0	A0A6N4D0T0
A0A6N4D0W5	2-dehydropantoate 2-reductase (EC 1.1.1.169) (Ketopantoate reductase)	ASJ32_01050	OTHER	Cytoplasmic	H	Catalyzes the NADPH-dependent reduction of ketopantoate into pantoic acid	Chromosome	22.4128	22.5217	22.6353	NaN	16	16	16	61.3	61.3	61.3	33.136	0	323.31	805000000	301	A0A6N4D0W5	A0A6N4D0W5
A0A6N4D0X2	Na(+)-translocating NADH-quinone reductase subunit A (Na(+)-NQR subunit A) (Na(+)-translocating NQR subunit A) (EC 7.2.1.1) (NQR complex subunit A) (NQR-1 subunit A)	nqrA ASJ32_01100	OTHER	Cytoplasmic	C	NQR complex catalyzes the reduction of ubiquinone-1 to ubiquinol by two successive reactions, coupled with the transport of Na( ) ions from the cytoplasm to the periplasm. NqrA to NqrE are probably involved in the second step, the conversion of ubisemiquinone to ubiquinol	Chromosome	25.9328	26.072	26.2983	25.9056	58	58	58	94.6	94.6	94.6	48.791	0	323.31	24478000000	4490	A0A6N4D0X2	A0A6N4D0X2
A0A6N4D104	Ribosome-recycling factor (RRF) (Ribosome-releasing factor)	frr ASJ32_01305 GO994_06815	OTHER	Cytoplasmic	J	Responsible for the release of ribosomes from messenger RNA at the termination of protein biosynthesis. May increase the efficiency of translation by recycling ribosomes from one round of translation to another	Chromosome	28.187	28.4365	28.7122	28.2853	46	46	46	100	100	100	20.667	0	323.31	10683000000	1981	A0A6N4D104	A0A6N4D104
A0A6N4D114	Uncharacterized protein	ASJ32_01425 GO994_06935	SP(Sec/SPI)	Unknown	S	Periplasmic lysozyme inhibitor of I-type lysozyme	Chromosome	24.9198	24.8105	24.6444	24.9925	11	11	11	82.8	82.8	82.8	15.557	0	323.31	826030000	256	A0A6N4D114	A0A6N4D114
A0A6P1H1G0	Coenzyme A biosynthesis bifunctional protein CoaBC (DNA/pantothenate metabolism flavoprotein) (Phosphopantothenoylcysteine synthetase/decarboxylase) (PPCS-PPCDC) [Includes: Phosphopantothenoylcysteine decarboxylase (PPC decarboxylase) (PPC-DC) (EC 4.1.1.36) (CoaC); Phosphopantothenate--cysteine ligase (EC 6.3.2.5) (CoaB) (Phosphopantothenoylcysteine synthetase) (PPC synthetase) (PPC-S)]	coaBC ASJ32_18960 GO994_00450	OTHER	Cytoplasmic	H	Catalyzes two steps in the biosynthesis of coenzyme A. In the first step cysteine is conjugated to 4'-phosphopantothenate to form 4-phosphopantothenoylcysteine, in the latter compound is decarboxylated to form 4'-phosphopantotheine	Chromosome	24.6918	24.5355	24.8937	25.4323	37	37	37	82	82	82	42.416	0	323.31	4042600000	1806	A0A6P1H1G0	A0A6P1H1G0
A0A6P1H1I3	Glyoxalase	elbB ASJ32_19120 GO994_00625	OTHER	Cytoplasmic	Q	Displays glyoxalase activity, catalyzing the conversion of glyoxal to glycolate	Chromosome	22.4213	21.3716	22.8413	22.6486	15	15	15	60.2	60.2	60.2	22.619	0	163.97	383280000	190	A0A6P1H1I3	A0A6P1H1I3
A0A6P1H1M7	Beta sliding clamp	dnaN ASJ32_09600 GO994_00010	OTHER	Cytoplasmic	L	Confers DNA tethering and processivity to DNA polymerases and other proteins. Acts as a clamp, forming a ring around DNA (a reaction catalyzed by the clamp-loading complex) which diffuses in an ATP-independent manner freely and bidirectionally along dsDNA. Initially characterized for its ability to contact the catalytic subunit of DNA polymerase III (Pol III), a complex, multichain enzyme respons…	Chromosome	25.8474	26.1733	26.029	25.4835	30	30	30	57.5	57.5	57.5	41.311	0	323.31	2379100000	958	A0A6P1H1M7	A0A6P1H1M7
A0A6P1H2B4	Guanylate kinase (EC 2.7.4.8) (GMP kinase)	gmk ASJ32_09425 GO994_00190	OTHER	Cytoplasmic	F	Essential for recycling GMP and indirectly, cGMP	Chromosome	24.5442	25.144	25.4264	24.439	13	13	13	62	62	62	23.542	0	323.31	625580000	417	A0A6P1H2B4	A0A6P1H2B4
A0A6P1H2H3	Probable alpha-L-glutamate ligase (EC 6.3.2.-)	rimK ASJ32_06170 GO994_02710	OTHER	Cytoplasmic	F	Belongs to the RimK family	Chromosome	22.6717	21.92	22.8353	23.1337	25	25	25	76.8	76.8	76.8	32.317	0	242.94	723310000	469	A0A6P1H2H3	A0A6P1H2H3
A0A6P1H2I4	LexA repressor (EC 3.4.21.88)	lexA ASJ32_19065 GO994_00570	OTHER	Cytoplasmic	K	Represses a number of genes involved in the response to DNA damage (SOS response), including recA and lexA. In the presence of single-stranded DNA, RecA interacts with LexA causing an autocatalytic cleavage which disrupts the DNA-binding part of LexA, leading to derepression of the SOS regulon and eventually DNA repair	Chromosome	23.212	23.7598	23.5506	22.9069	17	17	17	70.5	70.5	70.5	22.851	0	135.27	379650000	281	A0A6P1H2I4	A0A6P1H2I4
A0A6P1H2J3	DNA polymerase I (EC 2.7.7.7)	polA ASJ32_19130 GO994_00630	OTHER	Unknown	L	In addition to polymerase activity, this DNA polymerase exhibits 5'-3' exonuclease activity	Chromosome	27.5426	27.8449	28.1601	27.6064	112	112	112	95.2	95.2	95.2	101.62	0	323.31	28278000000	8179	A0A6P1H2J3	A0A6P1H2J3
A0A6P1H2J4	Ribonuclease G (EC 3.1.26.-)	ASJ32_06270 GO994_02840	OTHER	Cytoplasmic	J	Ribonuclease E/G family	Chromosome	25.8774	25.9404	26.3079	25.9272	48	48	48	80.8	80.8	80.8	55.207	0	323.31	3613000000	1727	A0A6P1H2J4	A0A6P1H2J4
A0A6P1H2K4	S-formylglutathione hydrolase (EC 3.1.2.12)	fghA ASJ32_10440 GO994_00705	OTHER	Unknown	S	Serine hydrolase involved in the detoxification of formaldehyde	Chromosome	24.6377	26.2616	23.5164	23.4603	17	17	17	63.7	63.7	63.7	31.001	0	323.31	650210000	393	A0A6P1H2K4	A0A6P1H2K4
A0A6P1H2M5	Ribosomal RNA small subunit methyltransferase I (EC 2.1.1.198) (16S rRNA 2'-O-ribose C1402 methyltransferase) (rRNA (cytidine-2'-O-)-methyltransferase RsmI)	rsmI ASJ32_16515 GO994_02095	OTHER	Cytoplasmic	H	Catalyzes the 2'-O-methylation of the ribose of cytidine 1402 (C1402) in 16S rRNA	Chromosome	25.3724	24.6618	25.0858	25.4749	29	29	29	84.1	84.1	84.1	30.191	0	323.31	2521900000	726	A0A6P1H2M5	A0A6P1H2M5
A0A6P1H2W5	Alanine dehydrogenase (EC 1.4.1.1)	ald ASJ32_10595 GO994_00815	OTHER	Cytoplasmic	C	Belongs to the AlaDH PNT family	Chromosome	24.7832	25.3035	26.2464	25.1491	27	27	27	69.3	69.3	69.3	38.839	0	323.31	1754600000	1088	A0A6P1H2W5	A0A6P1H2W5
A0A6P1H2X5	Peptide deformylase (PDF) (EC 3.5.1.88) (Polypeptide deformylase)	def ASJ32_10645 GO994_00865	OTHER	Cytoplasmic	J	Removes the formyl group from the N-terminal Met of newly synthesized proteins. Requires at least a dipeptide for an efficient rate of reaction. N-terminal L-methionine is a prerequisite for activity but the enzyme has broad specificity at other positions	Chromosome	24.493	24.7975	NaN	23.5721	11	11	11	68.2	68.2	68.2	19.432	0.00042535	22.01	368890000	163	A0A6P1H2X5	A0A6P1H2X5
A0A6P1H307	tRNA pseudouridine synthase D (EC 5.4.99.27) (tRNA pseudouridine(13) synthase) (tRNA pseudouridylate synthase D) (tRNA-uridine isomerase D)	truD ASJ32_17760 GO994_03965	OTHER	Cytoplasmic	J	Responsible for synthesis of pseudouridine from uracil- 13 in transfer RNAs	Chromosome	24.9743	25.3975	25.2431	25.073	24	24	24	77.8	77.8	77.8	38.319	0	323.31	2175700000	930	A0A6P1H307	A0A6P1H307
A0A6P1H336	Shikimate dehydrogenase (NADP(+)) (SDH) (EC 1.1.1.25)	aroE ASJ32_10685 GO994_00920	OTHER	Cytoplasmic	E	Involved in the biosynthesis of the chorismate, which leads to the biosynthesis of aromatic amino acids. Catalyzes the reversible NADPH linked reduction of 3-dehydroshikimate (DHSA) to yield shikimate (SA)	Chromosome	22.9099	22.3316	22.5499	23.3296	18	18	18	63.4	63.4	63.4	29.223	0	323.31	689490000	332	A0A6P1H336	A0A6P1H336
A0A6P1H3A0	Pantothenate kinase (EC 2.7.1.33) (Pantothenic acid kinase)	coaA ASJ32_07370 GO994_01625	OTHER	Cytoplasmic	H	Pantothenic acid kinase	Chromosome	24.1912	24.4565	23.3898	22.7926	27	27	27	81.1	81.1	81.1	36.261	0	222.14	586850000	340	A0A6P1H3A0	A0A6P1H3A0
A0A6P1H3C1	CoA-disulfide reductase (EC 1.8.1.14)	ASJ32_07515 GO994_01465	OTHER	Cytoplasmic	P	Pyridine nucleotide-disulphide oxidoreductase, dimerisation domain	Chromosome	23.3239	23.4129	23.3955	22.516	26	26	26	59	59	59	47.372	0	323.31	681680000	448	A0A6P1H3C1	A0A6P1H3C1
A0A6P1H3J1	Pyruvate dehydrogenase E1 component (EC 1.2.4.1)	aceE ASJ32_15010 GO994_02475	OTHER	Cytoplasmic	C	Component of the pyruvate dehydrogenase (PDH) complex, that catalyzes the overall conversion of pyruvate to acetyl-CoA and CO(2)	Chromosome	29.6552	29.849	29.9368	29.4486	148	148	148	85.1	85.1	85.1	98.71	0	323.31	110790000000	18353	A0A6P1H3J1	A0A6P1H3J1
A0A6P1H3K6	Ribosomal RNA large subunit methyltransferase E (EC 2.1.1.166) (23S rRNA Um2552 methyltransferase) (rRNA (uridine-2'-O-)-methyltransferase)	rlmE ftsJ rrmJ ASJ32_04310 GO994_05220	OTHER	Cytoplasmic	J	Specifically methylates the uridine in position 2552 of 23S rRNA at the 2'-O position of the ribose in the fully assembled 50S ribosomal subunit	Chromosome	21.9722	21.8344	20.9357	22.0819	20	20	20	88	88	88	23.293	0	323.31	1541100000	756	A0A6P1H3K6	A0A6P1H3K6
A0A6P1H3L6	tRNA pseudouridine synthase B (EC 5.4.99.25) (tRNA pseudouridine(55) synthase) (Psi55 synthase) (tRNA pseudouridylate synthase) (tRNA-uridine isomerase)	truB ASJ32_04250 GO994_05280	OTHER	Cytoplasmic	J	Responsible for synthesis of pseudouridine from uracil- 55 in the psi GC loop of transfer RNAs	Chromosome	27.3899	27.4355	25.0785	26.8215	32	32	32	79.9	79.9	79.9	35.374	0	323.31	6341900000	1731	A0A6P1H3L6	A0A6P1H3L6
A0A6P1H3M3	3'(2'),5'-bisphosphate nucleotidase CysQ (EC 3.1.3.7) (3'(2'),5-bisphosphonucleoside 3'(2')-phosphohydrolase) (3'-phosphoadenosine 5'-phosphate phosphatase) (PAP phosphatase)	cysQ ASJ32_20790 GO994_04285	OTHER	Cytoplasmic	P	3'(2'),5'-bisphosphate nucleotidase	Chromosome	24.7122	24.3365	24.0924	24.2912	8	8	8	32	32	32	27.886	0	323.31	488220000	233	A0A6P1H3M3	A0A6P1H3M3
A0A6P1H3Q6	7,8-dihydroneopterin aldolase (EC 4.1.2.25)	folB ASJ32_14915 GO994_02605	OTHER	Cytoplasmic	H	Catalyzes the conversion of 7,8-dihydroneopterin to 6- hydroxymethyl-7,8-dihydropterin	Chromosome	22.8162	23.4819	NaN	22.9241	5	5	5	51.2	51.2	51.2	13.517	0.00040469	13.178	60682000	45	A0A6P1H3Q6	A0A6P1H3Q6
A0A6P1H3R8	Aminoacyl-histidine dipeptidase (Beta-Ala-His dipeptidase) (EC 3.4.13.20)	pepD ASJ32_04865 GO994_04635	OTHER	Cytoplasmic	E	aminoacyl-histidine dipeptidase	Chromosome	26.6428	26.8911	26.7021	26.1783	37	37	37	88.2	88.2	88.2	52.344	0	323.31	7360400000	2468	A0A6P1H3R8	A0A6P1H3R8
A0A6P1H3U1	N5-carboxyaminoimidazole ribonucleotide mutase (N5-CAIR mutase) (EC 5.4.99.18) (5-(carboxyamino)imidazole ribonucleotide mutase)	purE ASJ32_10670 GO994_00905	OTHER	Unknown	F	Catalyzes the conversion of N5-carboxyaminoimidazole ribonucleotide (N5-CAIR) to 4-carboxy-5-aminoimidazole ribonucleotide (CAIR)	Chromosome	27.4675	27.1954	27.889	27.2244	18	18	18	86.8	86.8	86.8	17.167	0	323.31	8003500000	1933	A0A6P1H3U1	A0A6P1H3U1
A0A6P1H3V6	Coproporphyrinogen-III oxidase (EC 1.3.98.3)	hemN ASJ32_10715 GO994_00960	OTHER	Cytoplasmic	H	Belongs to the anaerobic coproporphyrinogen-III oxidase family	Chromosome	23.6956	22.8509	22.3777	22.6715	30	30	30	61.5	61.5	61.5	52.726	0	323.31	796110000	433	A0A6P1H3V6	A0A6P1H3V6
A0A6P1H3W8	Arginine N-succinyltransferase (EC 2.3.1.109)	astA ASJ32_17370 GO994_05960	OTHER	Cytoplasmic	E	Arginine N-succinyltransferase beta subunit	Chromosome	25.7027	25.9979	25.7985	25.1262	37	37	37	74.9	74.9	74.9	38.108	0	323.31	3752100000	1880	A0A6P1H3W8	A0A6P1H3W8
A0A6P1H402	(2E,6E)-farnesyl diphosphate synthase (EC 2.5.1.10) (Geranyl transferase)	ispA ASJ32_04355 GO994_05180	OTHER	Cytoplasmic	H	Belongs to the FPP GGPP synthase family	Chromosome	22.8667	22.3966	22.0887	23.2396	15	15	15	58.1	58.1	58.1	32.12	0	244.61	295560000	235	A0A6P1H402	A0A6P1H402
A0A6P1H435	Ribosomal RNA small subunit methyltransferase D (EC 2.1.1.171)	rsmD ASJ32_06415 GO994_02980	OTHER	Cytoplasmic	L	Specifically methylates the guanine in position 966 of 16S rRNA in the assembled 30S particle	Chromosome	22.9886	21.4196	NaN	23.7614	15	15	15	64.6	64.6	64.6	23.274	0	261.8	281530000	140	A0A6P1H435	A0A6P1H435
A0A6P1H453	Sulfate adenylyltransferase subunit 1 (EC 2.7.7.4) (ATP-sulfurylase large subunit) (Sulfate adenylate transferase) (SAT)	cysN ASJ32_20695 GO994_03660	OTHER	Cytoplasmic	H	Belongs to the TRAFAC class translation factor GTPase superfamily. Classic translation factor GTPase family. CysN NodQ subfamily	Chromosome	28.8264	28.8615	28.9141	28.8006	48	48	48	77.7	77.7	77.7	52.222	0	323.31	7893800000	1929	A0A6P1H453	A0A6P1H453
A0A6P1H471	Ribosomal RNA large subunit methyltransferase M (EC 2.1.1.186) (23S rRNA (cytidine2498-2'-O)-methyltransferase) (23S rRNA 2'-O-ribose methyltransferase RlmM)	rlmM ASJ32_01170 GO994_06680	OTHER	Cytoplasmic	J	Belongs to the class I-like SAM-binding methyltransferase superfamily. RNA methyltransferase RlmE family. RlmM subfamily	Chromosome	25.9459	25.9058	25.0047	25.6763	32	32	32	65.7	65.7	65.7	42.229	0	323.31	3730400000	1260	A0A6P1H471	A0A6P1H471
A0A6P1H472	Protein-methionine-sulfoxide reductase catalytic subunit MsrP (EC 1.8.5.-)	msrP ASJ32_07440 GO994_01555	TAT(Tat/SPI)	Unknown	C	Part of the MsrPQ system that repairs oxidized periplasmic proteins containing methionine sulfoxide residues (Met-O), using respiratory chain electrons. Thus protects these proteins from oxidative-stress damage caused by reactive species of oxygen and chlorine generated by the host defense mechanisms. MsrPQ is essential for the maintenance of envelope integrity under bleach stress, rescuing a wid…	Chromosome	22.6816	23.3137	22.954	23.0822	10	10	10	30.8	30.8	30.8	37.436	0	203.61	314210000	311	A0A6P1H472	A0A6P1H472
A0A6P1H498	DNA helicase (EC 3.6.4.12)	uvrD mutU recL ASJ32_10475 GO994_00740	OTHER	Cytoplasmic	L	DNA helicase	Chromosome	24.3943	22.9791	23.3203	24.6841	68	68	67	72.8	72.8	71.2	81.979	0	323.31	4381600000	1761	A0A6P1H498	A0A6P1H498
A0A6P1H4B9	16S rRNA m5C967 methyltransferase (EC 2.1.1.176) (rRNA (cytosine-C(5)-)-methyltransferase RsmB)	rsmB ASJ32_10635 GO994_00855	OTHER	Cytoplasmic	J	Specifically methylates the cytosine at position 967 (m5C967) of 16S rRNA	Chromosome	25.9513	26.5269	26.5122	26.6003	45	45	45	80.9	80.9	80.9	48.22	0	323.31	7571300000	2345	A0A6P1H4B9	A0A6P1H4B9
A0A6P1H4D1	Oxygen-dependent coproporphyrinogen-III oxidase (CPO) (Coprogen oxidase) (Coproporphyrinogenase) (EC 1.3.3.3)	hemF ASJ32_10680 GO994_00915	OTHER	Cytoplasmic	H	Involved in the heme biosynthesis. Catalyzes the aerobic oxidative decarboxylation of propionate groups of rings A and B of coproporphyrinogen-III to yield the vinyl groups in protoporphyrinogen-IX	Chromosome	23.5226	23.5534	23.1421	22.2552	18	18	18	65.9	65.9	65.9	34.914	0	323.31	244660000	267	A0A6P1H4D1	A0A6P1H4D1
A0A6P1H4K8	Glutamate 5-kinase (EC 2.7.2.11) (Gamma-glutamyl kinase) (GK)	proB ASJ32_04845 GO994_04665	OTHER	Cytoplasmic	E	Catalyzes the transfer of a phosphate group to glutamate to form L-glutamate 5-phosphate	Chromosome	22.5294	21.2786	21.9564	23.2738	39	39	39	87.2	87.2	87.2	39.373	0	323.31	3743200000	1195	A0A6P1H4K8	A0A6P1H4K8
A0A6P1H4N4	Protein-glutamate methylesterase/protein-glutamine glutaminase (EC 3.1.1.61) (EC 3.5.1.44)	cheB ASJ32_14310 GO994_07670	OTHER	Cytoplasmic	NT	catalyzes the demethylation of specific methylglutamate residues introduced into the chemoreceptors (methyl-accepting chemotaxis proteins) by CheR	Chromosome	24.5267	23.6757	23.3625	24.5566	30	30	30	83	83	83	39.901	0	323.31	1124300000	642	A0A6P1H4N4	A0A6P1H4N4
A0A6P1H4N7	Molybdopterin adenylyltransferase (EC 2.7.7.75)	ASJ32_04680 GO994_04840	OTHER	Cytoplasmic	H	Probable molybdopterin binding domain	Chromosome	24.8474	24.9839	25.062	25.0145	14	14	14	52.3	52.3	52.3	19.138	0	323.31	896770000	447	A0A6P1H4N7	A0A6P1H4N7
A0A6P1H4N8	Pseudouridine synthase (EC 5.4.99.-)	rluA ASJ32_19840 GO994_04185	OTHER	Cytoplasmic	J	Responsible for synthesis of pseudouridine from uracil	Chromosome	22.7515	23.4317	23.5906	23.2901	12	12	12	38.5	38.5	38.5	24.696	0	74.249	344690000	297	A0A6P1H4N8	A0A6P1H4N8
A0A6P1H4P1	ATP-dependent zinc metalloprotease FtsH (EC 3.4.24.-)	ftsH hflB ASJ32_04305 GO994_05225	OTHER	CytoplasmicMembrane	O	Acts as a processive, ATP-dependent zinc metallopeptidase for both cytoplasmic and membrane proteins. Plays a role in the quality control of integral membrane proteins	Chromosome	24.1967	24.0111	25.1912	25.6503	101	101	101	82.9	82.9	82.9	71.636	0	323.31	56342000000	9362	A0A6P1H4P1	A0A6P1H4P1
A0A6P1H591	2-oxoglutarate reductase (EC 1.1.1.399) (EC 1.1.1.95) (D-3-phosphoglycerate dehydrogenase)	serA ASJ32_19570 GO994_08015	OTHER	Cytoplasmic	EH	Belongs to the D-isomer specific 2-hydroxyacid dehydrogenase family	Chromosome	28.829	29.1067	28.5407	28.2432	51	51	51	96.3	96.3	96.3	44.696	0	323.31	45661000000	7077	A0A6P1H591	A0A6P1H591
A0A6P1H5D4	Purine nucleoside phosphoramidase (EC 3.9.1.-)	hinT ASJ32_10090 GO994_08415	OTHER	Cytoplasmic	FG	Scavenger mRNA decapping enzyme C-term binding	Chromosome	25.4784	24.0628	24.323	24.3503	10	10	10	69.8	69.8	69.8	12.939	0	104.19	537430000	209	A0A6P1H5D4	A0A6P1H5D4
A0A6P1H5D5	MPT synthase subunit 2 (EC 2.8.1.12) (Molybdenum cofactor biosynthesis protein E) (Molybdopterin synthase catalytic subunit) (Molybdopterin-converting factor large subunit) (Molybdopterin-converting factor subunit 2)	moaE ASJ32_02720 GO994_09415	OTHER	Cytoplasmic	H	MoaE protein	Chromosome	22.7155	22.3517	NaN	22.6422	14	14	14	69.8	69.8	69.8	17.919	0	102.58	389590000	144	A0A6P1H5D5	A0A6P1H5D5
A0A6P1H5F1	tRNA-2-methylthio-N(6)-dimethylallyladenosine synthase (EC 2.8.4.3) ((Dimethylallyl)adenosine tRNA methylthiotransferase MiaB) (tRNA-i(6)A37 methylthiotransferase)	miaB ASJ32_17065 GO994_05655	OTHER	Cytoplasmic	J	Catalyzes the methylthiolation of N6- (dimethylallyl)adenosine (i(6)A), leading to the formation of 2- methylthio-N6-(dimethylallyl)adenosine (ms(2)i(6)A) at position 37 in tRNAs that read codons beginning with uridine	Chromosome	24.476	24.0008	23.2202	24.5833	40	40	40	90.1	90.1	90.1	53.41	0	323.31	2457300000	1076	A0A6P1H5F1	A0A6P1H5F1
A0A6P1H5J4	Peptidyl-prolyl cis-trans isomerase (EC 5.2.1.8)	fkpA ASJ32_00625 GO994_06070	LIPO(Sec/SPII)	Periplasmic	M	Peptidyl-prolyl cis-trans	Chromosome	26.1443	25.944	25.7702	27.1497	50	50	50	91.4	91.4	91.4	28.654	0	323.31	80521000000	14613	A0A6P1H5J4	A0A6P1H5J4
A0A6P1H5J5	Tryptophan--tRNA ligase (EC 6.1.1.2) (Tryptophanyl-tRNA synthetase) (TrpRS)	trpS ASJ32_17350 GO994_05940	OTHER	Cytoplasmic	J	Tryptophanyl-tRNA synthetase	Chromosome	28.8428	28.9847	29.1439	28.7784	37	37	37	96.7	96.7	96.7	37.165	0	323.31	12412000000	2728	A0A6P1H5J5	A0A6P1H5J5
A0A6P1H5L4	Ditrans,polycis-undecaprenyl-diphosphate synthase ((2E,6E)-farnesyl-diphosphate specific) (EC 2.5.1.31) (Ditrans,polycis-undecaprenylcistransferase) (Undecaprenyl diphosphate synthase) (UDS) (Undecaprenyl pyrophosphate synthase) (UPP synthase)	uppS ASJ32_01310 GO994_06820	OTHER	Cytoplasmic	I	Catalyzes the sequential condensation of isopentenyl diphosphate (IPP) with (2E,6E)-farnesyl diphosphate (E,E-FPP) to yield (2Z,6Z,10Z,14Z,18Z,22Z,26Z,30Z,34E,38E)-undecaprenyl diphosphate (di-trans,octa-cis-UPP). UPP is the precursor of glycosyl carrier lipid in the biosynthesis of bacterial cell wall polysaccharide components such as peptidoglycan and lipopolysaccharide	Chromosome	23.6892	23.5727	23.6232	24.4386	16	16	16	55.8	55.8	55.8	28.388	0	231.81	310290000	198	A0A6P1H5L4	A0A6P1H5L4
A0A6P1H5N2	Adenosine deaminase (EC 3.5.4.4) (Adenosine aminohydrolase)	add ASJ32_10720 GO994_00965	OTHER	Cytoplasmic	F	Adenosine/AMP deaminase	Chromosome	23.9444	24.0239	24.5988	23.1539	27	27	27	65.2	65.2	65.2	36.455	0	168.99	1207600000	568	A0A6P1H5N2	A0A6P1H5N2
A0A6P1H5Q0	Alkyl hydroperoxide reductase subunit F	ahpF ASJ32_02055 GO994_10115	OTHER	CytoplasmicMembrane	C	Alkyl hydroperoxide reductase	Chromosome	27.6657	28.1565	28.4938	27.999	59	59	59	85.1	85.1	85.1	56.175	0	323.31	25455000000	5384	A0A6P1H5Q0	A0A6P1H5Q0
A0A6P1H5Q6	Glycerol-3-phosphate dehydrogenase [NAD(P)+] (EC 1.1.1.94) (NAD(P)H-dependent glycerol-3-phosphate dehydrogenase)	gpsA ASJ32_10840 GO994_01080	OTHER	Cytoplasmic	I	Glycerol-3-phosphate dehydrogenase	Chromosome	25.0392	24.5433	24.644	24.5404	25	25	25	72.2	72.2	72.2	35.369	0	323.31	2400600000	744	A0A6P1H5Q6	A0A6P1H5Q6
A0A6P1H5X9	tRNA N6-adenosine threonylcarbamoyltransferase (EC 2.3.1.234) (N6-L-threonylcarbamoyladenine synthase) (t(6)A synthase) (t(6)A37 threonylcarbamoyladenosine biosynthesis protein TsaD) (tRNA threonylcarbamoyladenosine biosynthesis protein TsaD)	tsaD ASJ32_17790 GO994_03995	OTHER	Extracellular	J	Required for the formation of a threonylcarbamoyl group on adenosine at position 37 (t(6)A37) in tRNAs that read codons beginning with adenine. Is involved in the transfer of the threonylcarbamoyl moiety of threonylcarbamoyl-AMP (TC-AMP) to the N6 group of A37, together with TsaE and TsaB. TsaD likely plays a direct catalytic role in this reaction	Chromosome	22.4928	22.2855	22.8044	22.7776	21	21	21	64.7	64.7	64.7	36.146	0	323.31	843630000	553	A0A6P1H5X9	A0A6P1H5X9
A0A6P1H621	Succinate dehydrogenase flavoprotein subunit (EC 1.3.5.1)	sdhA ASJ32_06725 GO994_10840	TAT(Tat/SPI)	CytoplasmicMembrane	C	Belongs to the FAD-dependent oxidoreductase 2 family. FRD SDH subfamily	Chromosome	26.793	26.9032	27.2039	26.482	56	56	56	67	67	67	64.29	0	323.31	5688700000	2292	A0A6P1H621	A0A6P1H621
A0A6P1H640	S-adenosylmethionine:tRNA ribosyltransferase-isomerase (EC 2.4.99.17) (Queuosine biosynthesis protein QueA)	queA ASJ32_02040 GO994_10130	OTHER	Cytoplasmic	J	Transfers and isomerizes the ribose moiety from AdoMet to the 7-aminomethyl group of 7-deazaguanine (preQ1-tRNA) to give epoxyqueuosine (oQ-tRNA)	Chromosome	25.0887	24.719	NaN	24.9371	17	17	17	54.9	54.9	54.9	39.156	0	268.69	1159000000	501	A0A6P1H640	A0A6P1H640
A0A6P1H644	Succinate dehydrogenase iron-sulfur subunit (EC 1.3.5.1)	sdhB ASJ32_06730 GO994_10845	OTHER	CytoplasmicMembrane	C	Belongs to the succinate dehydrogenase fumarate reductase iron-sulfur protein family	Chromosome	23.6317	22.7724	23.622	23.3348	27	27	27	88.2	88.2	88.2	26.692	0	323.31	1563400000	821	A0A6P1H644	A0A6P1H644
A0A6P1H6B5	tRNA-cytidine(32) 2-sulfurtransferase (EC 2.8.1.-) (Two-thiocytidine biosynthesis protein A) (tRNA 2-thiocytidine biosynthesis protein TtcA)	ttcA ASJ32_13075 GO994_10620	OTHER	Cytoplasmic	J	Catalyzes the ATP-dependent 2-thiolation of cytidine in position 32 of tRNA, to form 2-thiocytidine (s(2)C32). The sulfur atoms are provided by the cysteine cysteine desulfurase (IscS) system	Chromosome	26.1033	25.3854	25.7681	27.0569	27	27	27	77.5	77.5	77.5	34.19	0	316.27	2540100000	769	A0A6P1H6B5	A0A6P1H6B5
[truncated: 111 more rows]

## Sheet: Quant_Ctrl_IM
Quantified proteins in the inner membrane fraction of the control condition
[truncated: 1,658 more rows]

## Sheet: Quant_Ctrl_OM
Quantified proteins in the outer membrane fraction of the control condition
[truncated: 360 more rows]

## Sheet: Quant_Ctrl_Extra
Quantified proteins in the extracellular fraction of the control condition
[truncated: 700 more rows]

## Sheet: Quant_Ctrl_OMV
Quantified proteins in the outer membrane vesicle fraction of the control condition
[truncated: 910 more rows]

[truncated: 15 more sheets: Quant_FeLim_Cyt, Quant_FeLim_IM, Quant_FeLim_OM, Quant_FeLim_Extra, Quant_FeLim_OMV, Quant_Temp_Cyt, Quant_Temp_IM, Quant_Temp_OM, Quant_Temp_Extra, Quant_Temp_OMV, Quant_AB_Cyt, Quant_AB_IM, Quant_AB_OM, Quant_AB_Extra, Quant_AB_OMV]
