# Supplementary material for: Effect of Iron Limitation, Elevated Temperature, and Florfenicol on the Proteome and Vesiculation of the Fish Pathogen Aeromonas salmonicida
Source: Microorganisms. 2022 Aug 27;10(9):1735. doi: 10.3390/microorganisms10091735 (PMC9503180; doi:10.3390/microorganisms10091735)
Supplement: Supplementary file 1 [file microorganisms-10-01735-s001.zip › Supplement_table_S3.xlsx]

## Sheet: Overview
Effect of iron-limitation, elevated incubation temperature and florfenicol antibiotics on the subcellular proteomes and the vesiculation of the fish pathogen Aeromonas salmonicida
Authors: Tobias Kroniger, Mina Mehanny, Rabea Schlüter, Gregor Fuhrmann, Anke Trautwein-Schult, Bernd Köllner, and Dörte Becher
Overview of supplementary table S3 content:
Sheet 1	Overview of supplementary table content
Sheet 2	Significantly changed proteins in iron limitation (FeLim) condition	Quantified proteins of each of the enriched subcellular fractions of the iron limitation (FeLim) condition were tested for statistically relevant changes in abundance compared to the control condition with two-sides students t-tests. Proteins with statistically significant changes in abundance in the each of the enriched subcellular fractions of the cytosol, inner membrane, outer membrane, extrac…
Sheet 3	Significantly changed proteins in elevated temperature (Temp) condition	Quantified proteins of each of the enriched subcellular fractions of the elevated temperature (Temp) condition were tested for statistically relevant changes in abundance compared to the control condition with two-sides students t-tests. Proteins with statistically significant changes in abundance in the each of the enriched subcellular fractions of the cytosol, inner membrane, outer membrane, ex…
Sheet 4	Significantly changed proteins in antibiotic (AB) condition	Quantified proteins of each of the enriched subcellular fractions of the antibiotic (AB) condition were tested for statistically relevant changes in abundance compared to the control condition with two-sides students t-tests. Proteins with statistically significant changes in abundance in the each of the enriched subcellular fractions of the cytosol, inner membrane, outer membrane, extracellular …

## Sheet: Sign_changed_Proteins_FeLim
Significantly changed proteins in iron limitation (FeLim) condition
Quantified proteins of each of the enriched subcellular fractions of the iron limitation (FeLim) condition were tested for statistically relevant changes in abundance compared to the control condition with two-sides students t-tests. Proteins with statistically significant changes in abundance in the each of the enriched subcellular fractions of the cytosol, inner membrane, outer membrane, extrac…
Cytosol
Majority protein IDs	Protein names	Gene names	SignalP	PSORTb	COG Category	eggNOG description	LFQ intensity Ctrl1_Cyt	LFQ intensity Ctrl2_Cyt	LFQ intensity Ctrl3_Cyt	LFQ intensity Ctrl4_Cyt	LFQ intensity Fe1_Cyt	LFQ intensity Fe2_Cyt	LFQ intensity Fe3_Cyt	LFQ intensity Fe4_Cyt	LFQ intensity Ctrl1_Cyt Imputed	LFQ intensity Ctrl2_Cyt Imputed	LFQ intensity Ctrl3_Cyt Imputed	LFQ intensity Ctrl4_Cyt Imputed	LFQ intensity Fe1_Cyt Imputed	LFQ intensity Fe2_Cyt Imputed	LFQ intensity Fe3_Cyt Imputed	LFQ intensity Fe4_Cyt Imputed	Only identified by site	Reverse	Potential contaminant	Student's T-test Significant Ctrl_Cyt_Fe_Cyt	Student's T-test significant	-Log Student's T-test p-value Ctrl_Cyt_Fe_Cyt	Student's T-test q-value Ctrl_Cyt_Fe_Cyt	Student's T-test Difference Ctrl_Cyt_Fe_Cyt	Student's T-test Test statistic Ctrl_Cyt_Fe_Cyt	Peptides	Razor + unique peptides	Unique peptides	Sequence coverage [%]	Unique + razor sequence coverage [%]	Unique sequence coverage [%]	Mol. weight [kDa]	Q-value	Score	Intensity	MS/MS count	Protein IDs	Majority protein IDs	id
A0A6N4CZ10	Non ribosomal peptide synthetase BasB	ASJ32_09665 GO994_22180	OTHER	CytoplasmicMembrane	Q	Evidence 3 Function proposed based on presence of conserved amino acid motif, structural feature or limited homology	NaN	NaN	NaN	NaN	28.0327	27.9792	27.6212	27.5678	19.8533	19.9039	20.7352	20.3146	28.0327	27.9792	27.6212	27.5678				+	Ctrl_Cyt_Fe_Cyt	7.20259	8.99413e-05	-7.59845	-31.9301	51	51	51	72.6	72.6	72.6	81.319	0	323.31	32415000000	1833	A0A6N4CZ10	A0A6N4CZ10	2257
A0A6N4CW88	Putative histamine N-monooxygenase (Rhizobactin siderophore biosynthesis protein RhbE)	basC ASJ32_09660 GO994_22185	OTHER	Cytoplasmic	Q	l-lysine 6-monooxygenase	24.1827	24.7217	23.8402	24.0362	29.5286	29.748	29.6268	29.955	24.1827	24.7217	23.8402	24.0362	29.5286	29.748	29.6268	29.955				+	Ctrl_Cyt_Fe_Cyt	6.69705	0.000144037	-5.51942	-26.2672	40	40	40	62.7	62.7	62.7	49.683	0	323.31	10586000000	1935	A0A6N4CW88	A0A6N4CW88	1698
A0A0K0MDT9	Peptide synthetase	amoH ASJ32_11170	OTHER	Cytoplasmic	Q	COG1020 Non-ribosomal peptide synthetase modules and related proteins	NaN	NaN	NaN	NaN	25.6995	26.0535	26.0498	25.9301	20.9769	20.3652	20.1818	19.9294	25.6995	26.0535	26.0498	25.9301				+	Ctrl_Cyt_Fe_Cyt	6.39736	0.000191457	-5.56987	-23.3904	37	37	37	55.4	55.4	55.4	58.065	0	323.31	1989700000	473	A0A0K0MDT9	A0A0K0MDT9	3
A0A6N4CWY0	2,3-dihydroxybenzoate-AMP ligase (EC 2.7.7.58)	entE ASJ32_11195	OTHER	Cytoplasmic	Q	AMP-binding enzyme C-terminal domain	18.3869	18.6573	17.5235	16.6908	27.3918	27.6538	28.0458	27.3471	18.3869	18.6573	17.5235	16.6908	27.3918	27.6538	28.0458	27.3471				+	Ctrl_Cyt_Fe_Cyt	6.07907	0.000298829	-9.795	-20.6734	49	49	49	73.7	73.7	73.7	59.936	0	323.31	12261000000	1636	A0A6N4CWY0	A0A6N4CWY0	1843
A0A6N4CXV2	Isochorismate synthase (EC 5.4.4.2)	ASJ32_11200	OTHER	Cytoplasmic	HQ	chorismate binding enzyme	21.1744	20.0354	20.7462	21.6559	28.8349	27.7353	28.1534	28.214	21.1744	20.0354	20.7462	21.6559	28.8349	27.7353	28.1534	28.214				+	Ctrl_Cyt_Fe_Cyt	5.69537	0.000501368	-7.33144	-17.8053	35	35	35	66.6	66.6	66.6	41.813	0	323.31	13174000000	1460	A0A6N4CXV2	A0A6N4CXV2	2028
A0A6P1HDL3	2,3-dihydro-2,3-dihydroxybenzoate dehydrogenase (EC 1.3.1.28)	dhbA ASJ32_11180 GO994_14100	OTHER	Cytoplasmic	IQ	involved in the biosynthesis of siderophores, enterobactin, bacillibactin or vibriobactin	20.2576	19.1991	20.8441	21.0196	27.727	28.1799	28.4584	28.4522	20.2576	19.1991	20.8441	21.0196	27.727	28.1799	28.4584	28.4522				+	Ctrl_Cyt_Fe_Cyt	5.67824	0.000501368	-7.87429	-17.6867	24	24	24	100	100	100	25.893	0	323.31	6095700000	888	A0A6P1HDL3	A0A6P1HDL3	2726
A0A0K0MDU1	ABC transporter substrate-binding protein (Amonabactin ABC transporter substrate-binding protein)	ASJ32_11165 GO994_14085	SP(Sec/SPI)	Periplasmic	P	Periplasmic binding protein	21.2151	22.1074	22.0073	21.3433	25.8407	25.7675	26.1487	25.7347	21.2151	22.1074	22.0073	21.3433	25.8407	25.7675	26.1487	25.7347				+	Ctrl_Cyt_Fe_Cyt	5.59098	0.000525381	-4.20464	-17.0943	20	20	20	41.7	41.7	41.7	33.621	0	323.31	589950000	258	A0A0K0MDU1	A0A0K0MDU1	4
A0A0K0MDT1	Non-ribosomal peptide synthetase (Peptide synthetase)	amoF ASJ32_11185	OTHER	CytoplasmicMembrane	Q	COG1020 Non-ribosomal peptide synthetase modules and related proteins	23.3189	22.6046	22.9657	22.4524	28.8784	29.0881	28.6209	27.689	23.3189	22.6046	22.9657	22.4524	28.8784	29.0881	28.6209	27.689				+	Ctrl_Cyt_Fe_Cyt	5.37946	0.000598827	-5.73368	-15.7366	88	88	88	66	66	66	111.43	0	323.31	28878000000	3277	A0A0K0MDT1	A0A0K0MDT1	2
A0A6N4CYM8	ABC transporter substrate-binding protein (Ferric anguibactin-binding protein)	ASJ32_09700 GO994_22145	LIPO(Sec/SPII)	Unknown	P	Periplasmic binding protein	NaN	NaN	NaN	NaN	27.1288	27.1803	26.619	27.3283	19.1414	20.922	20.641	20.574	27.1288	27.1803	26.619	27.3283				+	Ctrl_Cyt_Fe_Cyt	5.37925	0.000598827	-6.74453	-15.7353	32	32	32	82.4	82.4	82.4	35.811	0	323.31	20715000000	1726	A0A6N4CYM8	A0A6N4CYM8	2187
A0A6N4CS41	Isochorismatase (EC 3.3.2.1)	ASJ32_11190 GO994_14110	OTHER	Cytoplasmic	Q	Isochorismatase	22.5611	22.2656	23.6229	21.5679	29.4999	28.7816	29.2077	29.0431	22.5611	22.2656	23.6229	21.5679	29.4999	28.7816	29.2077	29.0431				+	Ctrl_Cyt_Fe_Cyt	5.19544	0.000831216	-6.6287	-14.6401	33	33	33	79.8	79.8	79.8	33.93	0	323.31	14001000000	1024	A0A6N4CS41	A0A6N4CS41	768
A0A6N4CTP7	Homoserine kinase (HK) (HSK) (EC 2.7.1.39)	thrB ASJ32_19325	OTHER	Unknown	E	Catalyzes the ATP-dependent phosphorylation of L- homoserine to L-homoserine phosphate	24.6585	24.6482	24.4921	24.6459	25.6886	25.6435	25.8541	25.5418	24.6585	24.6482	24.4921	24.6459	25.6886	25.6435	25.8541	25.5418				+	Ctrl_Cyt_Fe_Cyt	5.08922	0.000973087	-1.07082	-14.0407	23	23	23	50.8	50.8	50.8	35.233	0	291.81	1071900000	421	A0A6N4CTP7	A0A6N4CTP7	1138
A0A6N4CY38	Uncharacterized protein	ASJ32_10870 GO994_01110	OTHER	Unknown	-	-	NaN	NaN	NaN	NaN	22.0036	21.5469	NaN	21.6348	19.5703	19.2805	19.9357	19.6902	22.0036	21.5469	21.7977	21.6348				+	Ctrl_Cyt_Fe_Cyt	4.80954	0.00159244	-2.12659	-12.5716	2	2	2	21.7	21.7	21.7	10.314	0	34.252	15381000	10	A0A6N4CY38	A0A6N4CY38	2075
A0A6N4CYL8	Non-ribosomal peptide synthetase	ASJ32_11175	OTHER	CytoplasmicMembrane	Q	COG1020 Non-ribosomal peptide synthetase modules and related proteins	NaN	NaN	NaN	NaN	24.1688	24.4383	24.6603	24.156	21.0045	20.6763	20.4331	19.6558	24.1688	24.4383	24.6603	24.156				+	Ctrl_Cyt_Fe_Cyt	4.80836	0.00159244	-3.91344	-12.5657	103	103	103	55.7	55.7	55.7	228.57	0	323.31	4605100000	1086	A0A6N4CYL8	A0A6N4CYL8	2182
Q7WYM8	Superoxide dismutase (EC 1.15.1.1)	sodA ASJ32_05385 GO994_19475	OTHER	Unknown	C	Destroys radicals which are normally produced within the cells and which are toxic to biological systems	21.6759	21.6511	NaN	NaN	29.3806	27.7786	28.9755	28.0271	21.6759	21.6511	19.6635	20.3905	29.3806	27.7786	28.9755	28.0271				+	Ctrl_Cyt_Fe_Cyt	4.75852	0.001667	-7.69519	-12.3197	17	17	17	96.1	96.1	96.1	22.906	0	323.31	3001300000	224	Q7WYM8	Q7WYM8	2840
A0A6N4CQY9	Vibriobactin utilization protein ViuB	ASJ32_13330	OTHER	Cytoplasmic	P	Siderophore-interacting protein	22.5189	23.0596	23.3947	21.6808	27.1891	27.3698	27.6726	26.9753	22.5189	23.0596	23.3947	21.6808	27.1891	27.3698	27.6726	26.9753				+	Ctrl_Cyt_Fe_Cyt	4.59357	0.00228483	-4.63818	-11.5371	14	14	14	52.2	52.2	52.2	30.135	0	166.94	1806700000	342	A0A6N4CQY9	A0A6N4CQY9	546
A0A6P1HAL7	Glutamate--cysteine ligase (EC 6.3.2.2) (Gamma-ECS) (GCS) (Gamma-glutamylcysteine synthetase)	gshA ASJ32_04000 GO994_18135	OTHER	Cytoplasmic	H	Belongs to the glutamate--cysteine ligase type 1 family. Type 1 subfamily	25.8458	25.5445	25.8883	25.6411	26.923	27.0852	27.394	27.0661	25.8458	25.5445	25.8883	25.6411	26.923	27.0852	27.394	27.0661				+	Ctrl_Cyt_Fe_Cyt	4.42333	0.00297316	-1.38713	-10.7778	44	44	44	75	75	75	60.377	0	323.31	4331400000	1789	A0A6P1HAL7	A0A6P1HAL7	2691
A0A6N4CZH2	Peptidase S9 (Prolyl oligopeptidase family serine peptidase)	ASJ32_02390 GO994_09760	SP(Sec/SPI)	Periplasmic	E	Protease II	NaN	NaN	NaN	NaN	24.9099	24.5955	24.5446	24.5326	20.978	19.7695	19.6271	21.109	24.9099	24.5955	24.5446	24.5326				+	Ctrl_Cyt_Fe_Cyt	4.39982	0.00297316	-4.27471	-10.6766	42	42	42	70.9	70.9	70.9	76.374	0	323.31	519790000	256	A0A6N4CZH2	A0A6N4CZH2	2343
A0A6N4CVD6	Peptidase M3	ASJ32_03450 GO994_19015	OTHER	Unknown	E	Peptidase family M3	24.7762	24.9353	24.388	24.3768	26.7969	26.2965	26.8471	26.5598	24.7762	24.9353	24.388	24.3768	26.7969	26.2965	26.8471	26.5598				+	Ctrl_Cyt_Fe_Cyt	4.38745	0.00297316	-2.00601	-10.6238	40	40	40	51.8	51.8	51.8	68.805	0	323.31	1592100000	642	A0A6N4CVD6	A0A6N4CVD6	1504
A0A6N4CU48	Prolyl endopeptidase (Prolyl oligopeptidase family serine peptidase)	ASJ32_18420 GO994_03275	LIPO(Sec/SPII)	Periplasmic	E	Prolyl oligopeptidase, N-terminal beta-propeller domain	23.8953	24.1449	23.9863	23.9138	25.3552	25.911	25.675	25.3289	23.8953	24.1449	23.9863	23.9138	25.3552	25.911	25.675	25.3289				+	Ctrl_Cyt_Fe_Cyt	4.36913	0.00297316	-1.58246	-10.5459	55	55	55	73.7	73.7	73.7	79.139	0	323.31	3057000000	1698	A0A6N4CU48	A0A6N4CU48	1227
A5I8G7	Heme utilization protein HutZ	hutZ ASJ32_00445	OTHER	Cytoplasmic	P	Pfam:Pyridox_oxidase	22.9476	23.9869	23.9572	22.2165	28.9054	28.2688	28.211	27.8738	22.9476	23.9869	23.9572	22.2165	28.9054	28.2688	28.211	27.8738				+	Ctrl_Cyt_Fe_Cyt	4.36111	0.00297316	-5.03772	-10.5119	32	32	32	96.2	96.2	96.2	20.843	0	323.31	9174300000	1036	A5I8G7	A5I8G7	2748
A0A6N4CLN5	Serine/threonine protein kinase	ASJ32_07025	OTHER	Cytoplasmic	T	serine protein kinase	23.1029	22.1835	22.3967	23.0081	26.0471	25.4507	25.9378	25.2319	23.1029	22.1835	22.3967	23.0081	26.0471	25.4507	25.9378	25.2319				+	Ctrl_Cyt_Fe_Cyt	4.24735	0.00352757	-2.99406	-10.0412	49	49	49	65.5	65.5	65.5	74.044	0	323.31	1928300000	964	A0A6N4CLN5	A0A6N4CLN5	70
A0A6N4CWC2	Histidine decarboxylase (HDC) (EC 4.1.1.22)	hdc ASJ32_09645	OTHER	Cytoplasmic	E	decarboxylase	NaN	NaN	NaN	NaN	25.3614	25.2655	25.017	24.1958	20.6399	21.5553	19.9862	21.1038	25.3614	25.2655	25.017	24.1958				+	Ctrl_Cyt_Fe_Cyt	4.15853	0.00398183	-4.13859	-9.68693	25	25	25	54.5	54.5	54.5	43.652	0	323.31	1831700000	458	A0A6N4CWC2	A0A6N4CWC2	1718
A0A6N4CLK5	DUF4377 domain-containing protein	ASJ32_06705 GO994_10820	LIPO(Sec/SPII)	Unknown	S	Domain of unknown function (DUF4377)	NaN	NaN	NaN	NaN	25.1353	24.2145	25.5346	26.603	19.9675	20.1246	20.5255	21.0167	25.1353	24.2145	25.5346	26.603				+	Ctrl_Cyt_Fe_Cyt	3.99561	0.0055547	-4.96326	-9.06609	10	10	10	54.7	54.7	54.7	11.969	0	228.08	4123900000	680	A0A6N4CLK5	A0A6N4CLK5	68
A0A6N4CSQ8	Dipeptidase (EC 3.4.-.-)	ASJ32_19970 GO994_13365	LIPO(Sec/SPII)	Unknown	E	Peptidase family C69	24.7769	24.767	25.085	24.8019	25.5563	25.7281	25.7928	25.6532	24.7769	24.767	25.085	24.8019	25.5563	25.7281	25.7928	25.6532				+	Ctrl_Cyt_Fe_Cyt	3.98052	0.0055547	-0.82494	-9.01043	53	53	53	77.1	77.1	77.1	55.589	0	323.31	2097800000	1450	A0A6N4CSQ8	A0A6N4CSQ8	900
A0A6N4CVC9	Peptide ABC transporter substrate-binding protein	ASJ32_16905	SP(Sec/SPI)	Periplasmic	E	Bacterial extracellular solute-binding proteins, family 5 Middle	22.9691	22.9515	22.9066	21.7457	25.5427	25.4067	25.9272	25.2169	22.9691	22.9515	22.9066	21.7457	25.5427	25.4067	25.9272	25.2169				+	Ctrl_Cyt_Fe_Cyt	3.86566	0.00691079	-2.88018	-8.59634	42	42	42	77.3	77.3	77.3	59.995	0	323.31	1357200000	938	A0A6N4CVC9	A0A6N4CVC9	1503
A0A6N4CWZ7	Phospho-2-dehydro-3-deoxyheptonate aldolase (EC 2.5.1.54)	ASJ32_13325	OTHER	Cytoplasmic	E	Stereospecific condensation of phosphoenolpyruvate (PEP) and D-erythrose-4-phosphate (E4P) giving rise to 3-deoxy-D- arabino-heptulosonate-7-phosphate (DAHP)	NaN	NaN	NaN	NaN	24.9383	23.5998	24.6647	23.6368	20.6942	20.2274	21.2037	20.1085	24.9383	23.5998	24.6647	23.6368				+	Ctrl_Cyt_Fe_Cyt	3.85462	0.00691079	-3.65145	-8.55743	28	27	26	70.4	70.4	68.5	40.105	0	323.31	4312100000	660	A0A6N4CWZ7	A0A6N4CWZ7	1853
A0A6N4CSV6	Hemolysin	ASJ32_18165	SP(Sec/SPI)	Extracellular	S	hemolysis in other organism	NaN	NaN	NaN	NaN	24.1663	24.6727	24.4094	24.1362	20.0265	20.8548	18.9454	20.9988	24.1663	24.6727	24.4094	24.1362				+	Ctrl_Cyt_Fe_Cyt	3.83339	0.0070151	-4.13975	-8.48304	45	45	45	69.7	69.7	69.7	68.528	0	323.31	877010000	678	A0A6N4CSV6	A0A6N4CSV6	932
A0A6N4CU70	Uncharacterized protein	ASJ32_04930	SP(Sec/SPI)	Unknown	S	COG0457 FOG TPR repeat	NaN	NaN	NaN	NaN	22.2751	NaN	21.8747	22.2802	20.8252	20.4539	20.3937	20.9301	22.2751	21.9174	21.8747	22.2802				+	Ctrl_Cyt_Fe_Cyt	3.77846	0.00748315	-1.43611	-8.29312	21	21	21	55	55	55	44.627	0	100.31	47020000	43	A0A6N4CU70	A0A6N4CU70	1240
A0A6N4CWG8	N-acetylglucosamine-binding protein A	ASJ32_03440	SP(Sec/SPI)	Extracellular	E	Probably interacts with GlcNAc residues. May promote attachment to both epithelial cell surfaces and chitin	NaN	22.4077	20.703	NaN	25.1498	25.2473	25.927	25.1657	20.4578	22.4077	20.703	20.1523	25.1498	25.2473	25.927	25.1657				+	Ctrl_Cyt_Fe_Cyt	3.76605	0.00748315	-4.44223	-8.25075	27	27	27	73.8	73.8	73.8	51.454	0	323.31	2586300000	1239	A0A6N4CWG8	A0A6N4CWG8	1741
A5I8G8	Heme utilization protein HutX (HuvX protein)	hutX ASJ32_00440	OTHER	Cytoplasmic	P	Haem utilisation ChuX/HutX	19.8988	24.1793	NaN	NaN	29.131	29.3894	28.9704	29.6225	19.8988	24.1793	21.7742	21.0368	29.131	29.3894	28.9704	29.6225				+	Ctrl_Cyt_Fe_Cyt	3.76395	0.00748315	-7.55605	-8.24358	18	18	18	93.5	93.5	93.5	19.096	0	175.61	3930800000	415	A5I8G8	A5I8G8	2749
A0A6N4CX11	1,4-alpha-glucan branching protein	ASJ32_03765 GO994_18385	OTHER	Unknown	G	PFAM glycoside hydrolase, family 13	21.8723	NaN	NaN	NaN	24.2313	24.5051	24.3299	24.4684	21.8723	20.9271	19.8063	20.235	24.2313	24.5051	24.3299	24.4684				+	Ctrl_Cyt_Fe_Cyt	3.7116	0.00776129	-3.6735	-8.06693	4	4	4	29	29	29	12.281	0.00042373	21.164	242810000	97	A0A6N4CX11	A0A6N4CX11	1860
A0A6N4CYP8	Peptide synthetase	ASJ32_09655	OTHER	Cytoplasmic	Q	Condensation domain	17.7466	19.4285	NaN	NaN	26.8448	26.5195	26.4801	24.8712	17.7466	19.4285	20.5347	20.8132	26.8448	26.5195	26.4801	24.8712				+	Ctrl_Cyt_Fe_Cyt	3.67268	0.00823505	-6.54816	-7.9377	122	122	122	73.7	73.7	73.7	160.57	0	323.31	26196000000	3390	A0A6N4CYP8	A0A6N4CYP8	2201
A0A6N4CTV7	Cold-shock protein (Ribosome-associated translation inhibitor RaiA)	raiA ASJ32_02895 GO994_09220	OTHER	Cytoplasmic	J	ribosomal subunit interface protein	24.2117	24.0015	22.895	23.6134	26.3676	26.4025	26.4412	25.7668	24.2117	24.0015	22.895	23.6134	26.3676	26.4025	26.4412	25.7668				+	Ctrl_Cyt_Fe_Cyt	3.61507	0.00915582	-2.56413	-7.74962	12	12	12	83	83	83	12.678	0	123.54	1950400000	627	A0A6N4CTV7	A0A6N4CTV7	1177
A0A6N4CZ72	Peptidase M36	ASJ32_02395	SP(Sec/SPI)	Unknown	O	Proprotein convertase P-domain	NaN	NaN	NaN	NaN	26.0988	26.8169	25.998	26.2992	19.4986	20.566	22.2097	22.1338	26.0988	26.8169	25.998	26.2992				+	Ctrl_Cyt_Fe_Cyt	3.58377	0.00934809	-5.20119	-7.64903	49	49	49	64.9	64.9	64.9	88.374	0	323.31	2582800000	901	A0A6N4CZ72	A0A6N4CZ72	2291
A0A6N4CQ09	Iron ABC transporter substrate-binding protein	ASJ32_14785	SP(Sec/SPI)	Unknown	P	Periplasmic binding protein	21.2432	22.4956	NaN	20.8667	26.3422	25.7909	25.9063	25.6711	21.2432	22.4956	19.4275	20.8667	26.3422	25.7909	25.9063	25.6711				+	Ctrl_Cyt_Fe_Cyt	3.56471	0.00949823	-4.91939	-7.58832	25	25	25	57.6	57.6	57.6	40.751	0	302.88	629760000	290	A0A6N4CQ09	A0A6N4CQ09	368
A0A6N4CP55	NAD(P)-bd_dom domain-containing protein	ASJ32_20755	OTHER	Unknown	GM	NAD(P)H-binding	18.2817	19.8455	NaN	19.6244	24.5218	24.7599	25.5075	25.8105	18.2817	19.8455	21.4076	19.6244	24.5218	24.7599	25.5075	25.8105				+	Ctrl_Cyt_Fe_Cyt	3.55566	0.00949823	-5.36012	-7.55963	18	18	18	76.3	76.3	76.3	22.632	0	323.31	2034200000	784	A0A6N4CP55	A0A6N4CP55	232
A5I8G9	ABC transporter substrate-binding protein (Hemin ABC transporter periplasmic HutB) (Hemin receptor)	hutB ASJ32_00435 GO994_17245	SP(Sec/SPI)	Periplasmic	P	ABC-type hemin transport system, periplasmic component	18.0218	18.0926	20.7814	NaN	26.3297	26.3786	26.9623	26.1294	18.0218	18.0926	20.7814	21.5745	26.3297	26.3786	26.9623	26.1294				+	Ctrl_Cyt_Fe_Cyt	3.48046	0.0105408	-6.83241	-7.32473	17	17	17	62	62	62	29.043	0	323.31	1623000000	406	A5I8G9	A5I8G9	2750
A0A6N4CX59	Universal stress protein UspE	ASJ32_13070	OTHER	Cytoplasmic	T	Universal stress protein family	NaN	NaN	NaN	NaN	22.9785	NaN	22.642	21.9033	19.3775	20.0127	20.0549	19.867	22.9785	21.6892	22.642	21.9033				+	Ctrl_Cyt_Fe_Cyt	3.45691	0.0108864	-2.47527	-7.25241	10	10	10	43.8	43.8	43.8	35.838	0	99.866	122760000	72	A0A6N4CX59	A0A6N4CX59	1884
A0A6N4CS43	Peptidase S8 (S8 family serine peptidase)	ASJ32_19475 GO994_13560	SP(Sec/SPI)	Unknown	O	Subtilase family	18.7674	19.5162	19.7274	20.5277	23.1331	25.9341	25.654	25.8744	18.7674	19.5162	19.7274	20.5277	23.1331	25.9341	25.654	25.8744				+	Ctrl_Cyt_Fe_Cyt	3.4405	0.0109114	-5.51422	-7.20239	45	45	45	83.4	83.4	83.4	66.89	0	323.31	13005000000	4626	A0A6N4CS43	A0A6N4CS43	770
A0A6N4D070	Peptide methionine sulfoxide reductase MsrA (Protein-methionine-S-oxide reductase) (EC 1.8.4.11) (Peptide-methionine (S)-S-oxide reductase) (Peptide Met(O) reductase)	msrA ASJ32_01810	OTHER	Unknown	O	Has an important function as a repair enzyme for proteins that have been inactivated by oxidation. Catalyzes the reversible oxidation-reduction of methionine sulfoxide in proteins to methionine	26.1668	25.948	26.1777	26.4149	27.3491	27.5717	28.1132	28.2038	26.1668	25.948	26.1777	26.4149	27.3491	27.5717	28.1132	28.2038				+	Ctrl_Cyt_Fe_Cyt	3.4236	0.0109752	-1.63259	-7.15116	9	9	9	69	69	69	23.133	0	292.28	2687900000	563	A0A6N4D070	A0A6N4D070	2465
A0A6N4CX02	Probable D-serine dehydratase (EC 4.3.1.18) (D-serine deaminase) (DSD)	dsdA ASJ32_13640 GO994_15125	OTHER	Cytoplasmic	E	Belongs to the serine threonine dehydratase family. DsdA subfamily	22.6066	22.3353	22.1887	22.4738	23.8777	23.9969	23.3189	23.5365	22.6066	22.3353	22.1887	22.4738	23.8777	23.9969	23.3189	23.5365				+	Ctrl_Cyt_Fe_Cyt	3.41717	0.0109752	-1.28142	-7.13172	17	17	17	52.4	52.4	52.4	48.247	0	235.12	164770000	172	A0A6N4CX02	A0A6N4CX02	1854
A0A6N4CQ48	2-keto-4-pentenoate hydratase	ASJ32_19360	OTHER	Unknown	Q	Fumarylacetoacetate (FAA) hydrolase family	21.0784	21.6988	20.888	20.9486	22.6544	23.0653	23.6749	23.0781	21.0784	21.6988	20.888	20.9486	22.6544	23.0653	23.6749	23.0781				+	Ctrl_Cyt_Fe_Cyt	3.37383	0.0118891	-1.96472	-7.00198	12	12	12	51.2	51.2	51.2	35.666	0	162.69	137120000	81	A0A6N4CQ48	A0A6N4CQ48	387
A0A6N4CVE9	CNNM family magnesium/cobalt transport protein CorC (Magnesium/cobalt efflux protein)	corC ASJ32_17050 GO994_05640	OTHER	CytoplasmicMembrane	P	Magnesium and cobalt efflux protein CorC	25.1325	25.3919	25.1956	25.3369	25.7029	25.9688	25.7983	25.8143	25.1325	25.3919	25.1956	25.3369	25.7029	25.9688	25.7983	25.8143				+	Ctrl_Cyt_Fe_Cyt	3.312	0.0129467	-0.556852	-6.82018	23	23	23	58.2	58.2	58.2	33.484	0	323.31	2503500000	962	A0A6N4CVE9	A0A6N4CVE9	1514
A0A6N4D0E4	DUF1566 domain-containing protein	ASJ32_02405 GO994_09745	SP(Sec/SPI)	Unknown	KLT	Protein of unknown function (DUF1566)	NaN	NaN	NaN	NaN	23.9236	23.9616	22.7215	24.1285	20.6282	18.5656	20.4231	19.9158	23.9236	23.9616	22.7215	24.1285				+	Ctrl_Cyt_Fe_Cyt	3.27624	0.0138022	-3.80059	-6.71679	16	16	16	67.6	67.6	67.6	20.462	0	323.31	964630000	416	A0A6N4D0E4	A0A6N4D0E4	2497
A0A6P1H7I7	N-succinylarginine dihydrolase (EC 3.5.3.23)	astB ASJ32_01530 GO994_07060	OTHER	Cytoplasmic	E	Catalyzes the hydrolysis of N(2)-succinylarginine into N(2)-succinylornithine, ammonia and CO(2)	25.0448	25.442	25.2399	25.3877	26.064	26.8625	26.5511	26.5881	25.0448	25.442	25.2399	25.3877	26.064	26.8625	26.5511	26.5881				+	Ctrl_Cyt_Fe_Cyt	3.22581	0.0149576	-1.23785	-6.57311	33	33	33	78.2	78.2	78.2	48.991	0	323.31	4314700000	1776	A0A6P1H7I7	A0A6P1H7I7	2637
A0A6N4CSQ4	O-acetylhomoserine aminocarboxypropyltransferase (EC 2.5.1.49)	ASJ32_05345	OTHER	Cytoplasmic	E	Cys/Met metabolism PLP-dependent enzyme	26.62	26.7117	26.614	27.1987	27.6844	27.963	28.2537	27.9439	26.62	26.7117	26.614	27.1987	27.6844	27.963	28.2537	27.9439				+	Ctrl_Cyt_Fe_Cyt	3.1902	0.0159559	-1.1751	-6.47312	30	30	30	81.3	81.3	81.3	45.018	0	323.31	9407400000	2204	A0A6N4CSQ4	A0A6N4CSQ4	899
A0A6N4CWL0	Quinolinate phosphoribosyltransferase [decarboxylating] (EC 2.4.2.19)	nadC ASJ32_15030 GO994_02455	OTHER	Cytoplasmic	H	Belongs to the NadC ModD family	24.5006	24.8011	25.4164	24.7394	26.0164	26.1788	26.3556	26.1871	24.5006	24.8011	25.4164	24.7394	26.0164	26.1788	26.3556	26.1871				+	Ctrl_Cyt_Fe_Cyt	3.15572	0.016604	-1.32007	-6.37744	24	24	24	72.6	72.6	72.6	30.802	0	165.62	870690000	325	A0A6N4CWL0	A0A6N4CWL0	1764
A0A6N4CWM0	UDP-3-O-acyl-N-acetylglucosamine deacetylase (UDP-3-O-acyl-GlcNAc deacetylase) (EC 3.5.1.108) (UDP-3-O-[R-3-hydroxymyristoyl]-N-acetylglucosamine deacetylase)	lpxC ASJ32_15085	OTHER	Cytoplasmic	M	Catalyzes the hydrolysis of UDP-3-O-myristoyl-N- acetylglucosamine to form UDP-3-O-myristoylglucosamine and acetate, the committed step in lipid A biosynthesis	NaN	NaN	NaN	NaN	23.6858	23.107	23.5023	23.204	21.1745	19.9231	21.6648	20.7248	23.6858	23.107	23.5023	23.204				+	Ctrl_Cyt_Fe_Cyt	3.15101	0.016604	-2.50301	-6.36444	18	18	18	61.2	61.2	61.2	34.326	0	199.25	300880000	142	A0A6N4CWM0	A0A6N4CWM0	1773
A0A6N4CTP1	Succinyl-CoA synthetase subunit alpha	ASJ32_04205	LIPO(Sec/SPII)	Unknown	S	Endonuclease/Exonuclease/phosphatase family	23.277	22.964	23.5439	23.6807	24.3801	24.6247	24.7046	24.3253	23.277	22.964	23.5439	23.6807	24.3801	24.6247	24.7046	24.3253				+	Ctrl_Cyt_Fe_Cyt	3.10529	0.0178272	-1.14226	-6.23947	30	30	30	64.1	64.1	64.1	49.312	0	323.31	1977300000	1158	A0A6N4CTP1	A0A6N4CTP1	1135
A0A6N4CS24	Maleylacetoacetate isomerase	ASJ32_19355	OTHER	Cytoplasmic	G	Glutathione S-transferase, C-terminal domain	25.6156	25.6782	25.548	25.2042	26.723	26.7816	27.3833	26.5041	25.6156	25.6782	25.548	25.2042	26.723	26.7816	27.3833	26.5041				+	Ctrl_Cyt_Fe_Cyt	3.08745	0.0178272	-1.33649	-6.19124	13	13	13	50	50	50	24.706	0	323.31	1259800000	277	A0A6N4CS24	A0A6N4CS24	756
A0A6N4CVF7	Nitroreductase	ASJ32_17100 GO994_05690	OTHER	Unknown	S	Nitroreductase	25.6306	26.2872	24.7454	24.6072	27.6803	28.3054	27.9668	27.6355	25.6306	26.2872	24.7454	24.6072	27.6803	28.3054	27.9668	27.6355				+	Ctrl_Cyt_Fe_Cyt	3.04722	0.0190614	-2.57939	-6.08347	21	21	21	89.5	89.5	89.5	22.584	0	215.97	2365200000	467	A0A6N4CVF7	A0A6N4CVF7	1519
A0A6N4CXX6	Free methionine-(R)-sulfoxide reductase (GAF domain-containing protein)	ASJ32_13015 GO994_10680	OTHER	Cytoplasmic	T	GAF domain	NaN	NaN	NaN	NaN	22.7279	22.7469	23.6086	23.8898	20.9325	20.5201	19.6424	21.1206	22.7279	22.7469	23.6086	23.8898				+	Ctrl_Cyt_Fe_Cyt	3.04004	0.0190614	-2.68939	-6.06441	6	6	6	43.4	43.4	43.4	16.502	0	50.458	984950000	52	A0A6N4CXX6	A0A6N4CXX6	2043
A0A6N4CZ48	Nickel transporter	ASJ32_02290	SP(Sec/SPI)	Periplasmic	ET	Belongs to the bacterial solute-binding protein 3 family	25.877	26.0499	25.2214	25.1767	27.1108	27.103	27.6732	26.9995	25.877	26.0499	25.2214	25.1767	27.1108	27.103	27.6732	26.9995				+	Ctrl_Cyt_Fe_Cyt	3.03755	0.0190614	-1.64038	-6.05778	44	44	44	84.8	84.8	84.8	28.483	0	323.31	5697300000	2356	A0A6N4CZ48	A0A6N4CZ48	2278
A0A6N4CSL9	4-hydroxy-tetrahydrodipicolinate reductase (HTPA reductase) (EC 1.17.1.8)	dapB ASJ32_19545 GO994_08040	OTHER	Cytoplasmic	E	Catalyzes the conversion of 4-hydroxy- tetrahydrodipicolinate (HTPA) to tetrahydrodipicolinate	25.6638	25.1389	25.81	25.4706	26.2887	26.6189	26.6559	26.7173	25.6638	25.1389	25.81	25.4706	26.2887	26.6189	26.6559	26.7173				+	Ctrl_Cyt_Fe_Cyt	3.0282	0.0191979	-1.04936	-6.03302	27	27	27	82.2	82.2	82.2	28.659	0	323.31	3447600000	1158	A0A6N4CSL9	A0A6N4CSL9	876
A0A6N4CUB4	Zinc-type alcohol dehydrogenase-like protein	ASJ32_04525 GO994_05015	OTHER	Cytoplasmic	C	Belongs to the zinc-containing alcohol dehydrogenase family. Quinone oxidoreductase subfamily	NaN	NaN	NaN	NaN	24.512	22.4567	23.8398	22.6088	20.3288	20.0248	20.3314	20.5577	24.512	22.4567	23.8398	22.6088				+	Ctrl_Cyt_Fe_Cyt	3.01828	0.0193648	-3.04363	-6.00684	15	15	15	57.7	57.7	57.7	36.547	0	210.72	313280000	119	A0A6N4CUB4	A0A6N4CUB4	1272
A0A6N4CUC7	Acetate kinase (EC 2.7.2.1) (Acetokinase)	ackA ASJ32_18215 GO994_03515	OTHER	Cytoplasmic	H	Catalyzes the formation of acetyl phosphate from acetate and ATP. Can also catalyze the reverse reaction	24.0223	23.6378	24.0446	24.155	24.912	24.7259	24.7877	24.571	24.0223	23.6378	24.0446	24.155	24.912	24.7259	24.7877	24.571				+	Ctrl_Cyt_Fe_Cyt	2.97169	0.0203618	-0.784206	-5.885	30	29	29	86.5	84.2	84.2	42.553	0	323.31	1366900000	821	A0A6N4CUC7	A0A6N4CUC7	1281
A0A6N4CPI3	Aspartate-semialdehyde dehydrogenase (ASA dehydrogenase) (ASADH) (EC 1.2.1.11) (Aspartate-beta-semialdehyde dehydrogenase)	asd ASJ32_06775 GO994_10890	OTHER	Cytoplasmic	E	Catalyzes the NADPH-dependent formation of L-aspartate- semialdehyde (L-ASA) by the reductive dephosphorylation of L- aspartyl-4-phosphate	27.8455	28.4836	28.4575	28.1269	29.1139	29.1861	29.314	29.575	27.8455	28.4836	28.4575	28.1269	29.1139	29.1861	29.314	29.575				+	Ctrl_Cyt_Fe_Cyt	2.96581	0.0203618	-1.06887	-5.86976	46	46	46	91.4	91.4	91.4	40.121	0	323.31	18229000000	3222	A0A6N4CPI3	A0A6N4CPI3	285
A0A6N4CW39	Anti-sigma factor (Rsd/AlgQ family anti-sigma factor)	ASJ32_15700 GO994_18595	OTHER	Cytoplasmic	K	Belongs to the Rsd AlgQ family	22.3878	21.8911	NaN	19.8238	24.8106	24.6738	25.8692	24.8582	22.3878	21.8911	20.3202	19.8238	24.8106	24.6738	25.8692	24.8582				+	Ctrl_Cyt_Fe_Cyt	2.9656	0.0203618	-3.94723	-5.86923	9	9	9	38.1	38.1	38.1	18.376	0	63.98	397180000	153	A0A6N4CW39	A0A6N4CW39	1664
A0A6N4CZP7	Sulfurtransferase	ASJ32_02015 GO994_10155	OTHER	Cytoplasmic	P	Rhodanese Homology Domain	23.0891	22.6757	23.3506	23.6626	24.414	24.9862	24.9547	24.4659	23.0891	22.6757	23.3506	23.6626	24.414	24.9862	24.9547	24.4659				+	Ctrl_Cyt_Fe_Cyt	2.94863	0.0206929	-1.51069	-5.8254	13	13	13	95.1	95.1	95.1	13.982	0	233.31	720350000	543	A0A6N4CZP7	A0A6N4CZP7	2382
A0A6P1H336	Shikimate dehydrogenase (NADP(+)) (SDH) (EC 1.1.1.25)	aroE ASJ32_10685 GO994_00920	OTHER	Cytoplasmic	E	Involved in the biosynthesis of the chorismate, which leads to the biosynthesis of aromatic amino acids. Catalyzes the reversible NADPH linked reduction of 3-dehydroshikimate (DHSA) to yield shikimate (SA)	22.9099	22.3316	22.5499	23.3296	24.9359	25.0056	24.5547	23.9976	22.9099	22.3316	22.5499	23.3296	24.9359	25.0056	24.5547	23.9976				+	Ctrl_Cyt_Fe_Cyt	2.93762	0.0207642	-1.84319	-5.79707	18	18	18	63.4	63.4	63.4	29.223	0	323.31	689490000	332	A0A6P1H336	A0A6P1H336	2558
A0A6N4CRL1	3-oxoacyl-ACP synthase (EC 2.3.1.41) (Beta-ketoacyl-ACP synthase I)	fabB ASJ32_06695 GO994_10810	OTHER	Cytoplasmic	IQ	Belongs to the beta-ketoacyl-ACP synthases family	28.4255	28.281	28.2583	28.2802	28.695	28.8985	29.059	28.73	28.4255	28.281	28.2583	28.2802	28.695	28.8985	29.059	28.73				+	Ctrl_Cyt_Fe_Cyt	2.93614	0.0207642	-0.534401	-5.79329	40	40	40	81.1	81.1	81.1	42.762	0	323.31	20827000000	5452	A0A6N4CRL1	A0A6N4CRL1	675
A0A6N4CVE6	Chaperone protein HtpG (Heat shock protein HtpG) (High temperature protein G)	htpG ASJ32_11265 GO994_14185	OTHER	Cytoplasmic	O	Molecular chaperone. Has ATPase activity	29.4479	29.4518	29.3251	29.0842	29.9732	29.874	29.7694	29.9201	29.4479	29.4518	29.3251	29.0842	29.9732	29.874	29.7694	29.9201				+	Ctrl_Cyt_Fe_Cyt	2.92846	0.020874	-0.556948	-5.7736	102	102	102	97.5	97.5	97.5	71.728	0	323.31	75269000000	15314	A0A6N4CVE6	A0A6N4CVE6	1512
A0A6N4CXF0	Response regulator (Transcriptional regulator)	ASJ32_12550 GO994_11900	OTHER	Cytoplasmic	T	HD domain	19.5416	NaN	20.0403	20.221	21.3898	21.4821	21.8386	20.8435	19.5416	19.4385	20.0403	20.221	21.3898	21.4821	21.8386	20.8435				+	Ctrl_Cyt_Fe_Cyt	2.87464	0.0225322	-1.57812	-5.63709	16	16	16	40.7	40.7	40.7	40.917	0	323.31	96722000	105	A0A6N4CXF0	A0A6N4CXF0	1937
A0A6N4CNL5	M6 family metalloprotease domain-containing protein (Protease)	ASJ32_05045 GO994_04425	SP(Sec/SPI)	Unknown	O	peptidase M6 immune inhibitor A	22.263	20.4095	NaN	20.6492	24.8826	23.87	24.3085	23.7693	22.263	20.4095	19.5638	20.6492	24.8826	23.87	24.3085	23.7693				+	Ctrl_Cyt_Fe_Cyt	2.87433	0.0225322	-3.48624	-5.63632	38	38	38	51.5	51.5	51.5	83.069	0	289.37	917580000	448	A0A6N4CNL5	A0A6N4CNL5	182
A0A6N4CXT2	Phosphoserine aminotransferase (EC 2.6.1.52) (Phosphohydroxythreonine aminotransferase) (PSAT)	serC ASJ32_11100 GO994_14015	OTHER	Cytoplasmic	E	Catalyzes the reversible conversion of 3- phosphohydroxypyruvate to phosphoserine and of 3-hydroxy-2-oxo-4- phosphonooxybutanoate to phosphohydroxythreonine	26.7802	27.4028	26.7961	26.2297	28.2051	28.4305	28.2979	27.9475	26.7802	27.4028	26.7961	26.2297	28.2051	28.4305	28.2979	27.9475				+	Ctrl_Cyt_Fe_Cyt	2.79733	0.0257003	-1.41806	-5.44513	48	48	48	85.6	85.6	85.6	39.535	0	323.31	11859000000	4063	A0A6N4CXT2	A0A6N4CXT2	2016
A0A6N4CSB8	UPF0178 protein ASJ32_05530	ASJ32_05530 GO994_20285	OTHER	Cytoplasmic	S	Belongs to the UPF0178 family	22.605	22.3167	22.5123	22.5202	23.3159	22.9104	23.3135	23.0052	22.605	22.3167	22.5123	22.5202	23.3159	22.9104	23.3135	23.0052				+	Ctrl_Cyt_Fe_Cyt	2.7542	0.0277526	-0.647723	-5.34008	7	7	7	46.7	46.7	46.7	16.372	0	53.921	68673000	48	A0A6N4CSB8	A0A6N4CSB8	819
A0A6N4CYY6	Metal-dependent carboxypeptidase (EC 3.4.17.19)	ASJ32_00840	OTHER	Cytoplasmic	E	Broad specificity carboxypetidase that releases amino acids sequentially from the C-terminus, including neutral, aromatic, polar and basic residues	25.3204	25.9597	24.5908	26.0592	26.9967	27.844	28.122	27.9551	25.3204	25.9597	24.5908	26.0592	26.9967	27.844	28.122	27.9551				+	Ctrl_Cyt_Fe_Cyt	2.74784	0.0278562	-2.24695	-5.3247	55	55	55	90.2	90.2	90.2	55.472	0	323.31	21337000000	3525	A0A6N4CYY6	A0A6N4CYY6	2247
A0A6N4CW81	Nicotinate phosphoribosyltransferase (NAPRTase) (EC 6.3.4.21)	pncB ASJ32_13820	OTHER	Cytoplasmic	H	Catalyzes the synthesis of beta-nicotinate D- ribonucleotide from nicotinate and 5-phospho-D-ribose 1-phosphate at the expense of ATP	20.0996	21.1895	NaN	20.9383	22.7255	22.3698	22.8997	21.8674	20.0996	21.1895	20.2396	20.9383	22.7255	22.3698	22.8997	21.8674				+	Ctrl_Cyt_Fe_Cyt	2.73463	0.0284074	-1.84887	-5.29289	24	24	24	60.2	60.2	60.2	44.927	0	161.79	138180000	118	A0A6N4CW81	A0A6N4CW81	1692
A0A6N4CX28	Amino acid ABC transporter substrate-binding protein	ASJ32_12205	SP(Sec/SPI)	Periplasmic	ET	Ligated ion channel L-glutamate- and glycine-binding site	26.6192	26.5946	27.1765	26.5008	27.5574	27.7463	27.4992	27.5302	26.6192	26.5946	27.1765	26.5008	27.5574	27.7463	27.4992	27.5302				+	Ctrl_Cyt_Fe_Cyt	2.72703	0.0286018	-0.860535	-5.27462	32	32	32	73.5	73.5	73.5	29.038	0	323.31	5672300000	1456	A0A6N4CX28	A0A6N4CX28	1873
A0A6N4CZU3	Uncharacterized protein	ASJ32_02400	LIPO(Sec/SPII)	Unknown	N	Protein of unknown function (DUF1566)	NaN	NaN	NaN	NaN	23.8057	24.192	21.3394	23.76	19.3191	20.316	19.6315	19.2117	23.8057	24.192	21.3394	23.76				+	Ctrl_Cyt_Fe_Cyt	2.71087	0.0290674	-3.65468	-5.23597	19	19	19	54.8	54.8	54.8	49.417	0	323.31	1906500000	458	A0A6N4CZU3	A0A6N4CZU3	2403
A0A6N4CP86	4-hydroxy-tetrahydrodipicolinate synthase (HTPA synthase) (EC 4.3.3.7)	dapA ASJ32_16050	OTHER	Cytoplasmic	E	Catalyzes the condensation of (S)-aspartate-beta- semialdehyde (S)-ASA and pyruvate to 4-hydroxy- tetrahydrodipicolinate (HTPA)	28.5165	28.6498	28.5842	28.2423	29.1526	28.867	29.0857	29.0707	28.5165	28.6498	28.5842	28.2423	29.1526	28.867	29.0857	29.0707				+	Ctrl_Cyt_Fe_Cyt	2.61984	0.0340715	-0.545803	-5.02181	29	29	29	97.9	97.9	97.9	31.394	0	323.31	12783000000	3021	A0A6N4CP86	A0A6N4CP86	243
A0A6P1HDX3	ATP-dependent RNA helicase SrmB (EC 3.6.4.13)	srmB ASJ32_15745 GO994_18650	OTHER	Cytoplasmic	L	DEAD-box RNA helicase involved in the assembly of the 50S ribosomal subunit at low temperature. Exhibits RNA-stimulated ATP hydrolysis and RNA unwinding activity	21.888	NaN	20.9904	23.4196	25.7818	26.0471	25.9529	25.7366	21.888	19.0709	20.9904	23.4196	25.7818	26.0471	25.9529	25.7366				+	Ctrl_Cyt_Fe_Cyt	2.60202	0.034755	-4.53741	-4.98061	28	28	28	65.1	65.1	65.1	45.562	0	323.31	3518600000	939	A0A6P1HDX3	A0A6P1HDX3	2729
A0A6N4CNV5	Aerolysin	ASJ32_06145	SP(Sec/SPI)	Extracellular	S	Aerolysin toxin	21.6132	23.2277	20.8218	NaN	24.7271	25.4025	25.1932	25.5904	21.6132	23.2277	20.8218	19.5732	24.7271	25.4025	25.1932	25.5904				+	Ctrl_Cyt_Fe_Cyt	2.60097	0.034755	-3.9193	-4.97817	30	30	30	43.3	43.3	43.3	54.073	0	323.31	1915900000	1091	A0A6N4CNV5	A0A6N4CNV5	204
A0A6N4CQ69	Uncharacterized protein	ASJ32_19480 GO994_13555	SP(Sec/SPI)	Unknown	-	-	21.9878	NaN	21.9461	22.4651	23.7619	25.5236	25.8605	25.2528	21.9878	20.0802	21.9461	22.4651	23.7619	25.5236	25.8605	25.2528				+	Ctrl_Cyt_Fe_Cyt	2.5946	0.034755	-3.4799	-4.96351	8	8	8	42.5	42.5	42.5	16.037	0	69.773	143590000	89	A0A6N4CQ69	A0A6N4CQ69	400
A0A6N4CZ96	Molybdopterin molybdenumtransferase (EC 2.10.1.1)	ASJ32_02670	OTHER	Cytoplasmic	H	MoeA N-terminal region (domain I and II)	25.7034	25.2145	25.3041	25.5998	26.1143	25.9624	26.2925	26.1278	25.7034	25.2145	25.3041	25.5998	26.1143	25.9624	26.2925	26.1278				+	Ctrl_Cyt_Fe_Cyt	2.59434	0.034755	-0.668788	-4.96291	25	25	25	86.3	86.3	86.3	43.238	0	323.31	1835400000	786	A0A6N4CZ96	A0A6N4CZ96	2305
A0A6N4CRJ3	DnaT domain-containing protein	ASJ32_20765 GO994_04260	OTHER	Cytoplasmic	-	-	22.8828	21.9119	22.5888	22.5887	23.7537	23.8868	23.3502	23.6308	22.8828	21.9119	22.5888	22.5887	23.7537	23.8868	23.3502	23.6308				+	Ctrl_Cyt_Fe_Cyt	2.58337	0.0350401	-1.16229	-4.93769	13	13	13	44.8	44.8	44.8	26.716	0	304.82	275730000	257	A0A6N4CRJ3	A0A6N4CRJ3	663
A5I8G3	Hemin import ATP-binding protein HmuV (EC 7.6.2.-)	hutD hmuV ASJ32_00425 GO994_17255	OTHER	CytoplasmicMembrane	P	Part of the ABC transporter complex HmuTUV involved in hemin import. Responsible for energy coupling to the transport system	NaN	NaN	NaN	NaN	22.7484	23.8594	22.6735	23.1562	20.2225	18.8841	20.026	21.5088	22.7484	23.8594	22.6735	23.1562				+	Ctrl_Cyt_Fe_Cyt	2.56502	0.0358177	-2.94903	-4.89575	16	16	16	70.6	70.6	70.6	28.709	0	215.01	338870000	112	A5I8G3	A5I8G3	2745
A0A6N4CSV3	4-hydroxy-4-methyl-2-oxoglutarate aldolase (HMG aldolase) (EC 4.1.1.112) (EC 4.1.3.17) (Oxaloacetate decarboxylase)	ASJ32_19295 GO994_16470	OTHER	Cytoplasmic	H	Catalyzes the aldol cleavage of 4-hydroxy-4-methyl-2- oxoglutarate (HMG) into 2 molecules of pyruvate. Also contains a secondary oxaloacetate (OAA) decarboxylase activity due to the common pyruvate enolate transition state formed following C-C bond cleavage in the retro-aldol and decarboxylation reactions	NaN	NaN	NaN	NaN	21.9889	22.6963	22.4011	22.6543	19.3163	19.3874	21.1766	20.513	21.9889	22.6963	22.4011	22.6543				+	Ctrl_Cyt_Fe_Cyt	2.5517	0.0365294	-2.33681	-4.86543	6	6	6	35.2	35.2	35.2	16.761	0	63.605	65156000	64	A0A6N4CSV3	A0A6N4CSV3	930
A0A6N4CQZ5	Transcriptional regulator	ASJ32_22530	OTHER	Cytoplasmic	K	Repressor	23.8563	23.4275	22.9474	24.168	25.1762	24.741	25.577	25.833	23.8563	23.4275	22.9474	24.168	25.1762	24.741	25.577	25.833				+	Ctrl_Cyt_Fe_Cyt	2.54619	0.0365294	-1.732	-4.85292	28	28	27	81.9	81.9	79	26.16	0	323.31	743970000	525	A0A6N4CQZ5	A0A6N4CQZ5	549
A0A6N4CXW1	Adenylate kinase (AK) (EC 2.7.4.3) (ATP-AMP transphosphorylase) (ATP:AMP phosphotransferase) (Adenylate monophosphate kinase)	adk ASJ32_11255	OTHER	Cytoplasmic	F	Catalyzes the reversible transfer of the terminal phosphate group between ATP and AMP. Plays an important role in cellular energy homeostasis and in adenine nucleotide metabolism	28.108	28.0965	27.8698	27.961	28.4125	28.5447	28.6445	28.2912	28.108	28.0965	27.8698	27.961	28.4125	28.5447	28.6445	28.2912				+	Ctrl_Cyt_Fe_Cyt	2.54142	0.0365294	-0.464417	-4.8421	37	37	37	93	93	93	23.196	0	323.31	14361000000	3199	A0A6N4CXW1	A0A6N4CXW1	2033
A0A6N4CZ97	YceI domain-containing protein	ASJ32_02640 GO994_09495	SP(Sec/SPI)	Unknown	S	Belongs to the UPF0312 family	21.828	21.0665	20.5352	20.1459	22.6843	22.4734	22.8575	23.2105	21.828	21.0665	20.5352	20.1459	22.6843	22.4734	22.8575	23.2105				+	Ctrl_Cyt_Fe_Cyt	2.5356	0.0366473	-1.9125	-4.82895	14	14	14	76.3	76.3	76.3	20.271	0	323.31	166810000	241	A0A6N4CZ97	A0A6N4CZ97	2306
A0A6N4CX49	Uncharacterized protein	ASJ32_10495	OTHER	Cytoplasmic	S	protein conserved in bacteria	26.2478	26.6214	26.51	25.5477	27.6816	27.8225	27.6273	27.1635	26.2478	26.6214	26.51	25.5477	27.6816	27.8225	27.6273	27.1635				+	Ctrl_Cyt_Fe_Cyt	2.51807	0.0372816	-1.34198	-4.78943	26	26	26	83.1	83.1	83.1	18.424	0	323.31	3829400000	1293	A0A6N4CX49	A0A6N4CX49	1881
A0A6N4CWH6	Ferredoxin--NADP(+) reductase (Ferredoxin-NADP reductase)	ASJ32_03965 GO994_18175	OTHER	Cytoplasmic	C	Oxidoreductase NAD-binding domain	22.6481	23.5422	22.2022	NaN	25.3031	25.2873	26.3771	25.3961	22.6481	23.5422	22.2022	20.419	25.3031	25.2873	26.3771	25.3961				+	Ctrl_Cyt_Fe_Cyt	2.518	0.0372816	-3.38804	-4.78927	20	20	20	60.7	60.7	60.7	27.147	0	176.93	371140000	153	A0A6N4CWH6	A0A6N4CWH6	1743
A0A6N4D114	Uncharacterized protein	ASJ32_01425 GO994_06935	SP(Sec/SPI)	Unknown	S	Periplasmic lysozyme inhibitor of I-type lysozyme	24.9198	24.8105	24.6444	24.9925	26.661	26.6382	27.3638	25.6331	24.9198	24.8105	24.6444	24.9925	26.661	26.6382	27.3638	25.6331				+	Ctrl_Cyt_Fe_Cyt	2.50481	0.0372816	-1.73223	-4.75966	11	11	11	82.8	82.8	82.8	15.557	0	323.31	826030000	256	A0A6N4D114	A0A6N4D114	2537
A0A6N4CQ53	D-galactose-binding periplasmic protein (D-galactose/ D-glucose-binding protein)	mglB ASJ32_07645 GO994_20990	SP(Sec/SPI)	Periplasmic	G	Periplasmic binding protein domain	24.6242	24.4243	25.2095	24.4093	25.8223	25.4223	25.6777	25.641	24.6242	24.4243	25.2095	24.4093	25.8223	25.4223	25.6777	25.641				+	Ctrl_Cyt_Fe_Cyt	2.50265	0.0372816	-0.973963	-4.75484	24	24	24	75.9	75.9	75.9	35.16	0	323.31	615990000	384	A0A6N4CQ53	A0A6N4CQ53	389
Q6SLH5	Ferric siderophore receptor (Ferric siderophore receptor B) (Ligand-gated channel protein)	fstB fstA ASJ32_09705	SP(Sec/SPI)	OuterMembrane	P	TonB dependent receptor	NaN	NaN	NaN	24.0212	26.3885	26.1083	25.3158	26.6255	20.2469	19.2789	20.1944	24.0212	26.3885	26.1083	25.3158	26.6255				+	Ctrl_Cyt_Fe_Cyt	2.4987	0.0372816	-5.17413	-4.74599	106	106	106	92	92	92	88.281	0	323.31	174680000000	24060	Q6SLH5	Q6SLH5	2839
A0A6N4CMM1	Cys-tRNA(Pro)/Cys-tRNA(Cys) deacylase (EC 4.2.-.-)	ybaK ASJ32_05820 GO994_19995	OTHER	Cytoplasmic	S	Belongs to the prolyl-tRNA editing family. YbaK EbsC subfamily	22.5331	NaN	NaN	NaN	24.794	24.6469	23.5683	23.3456	22.5331	20.1487	20.4794	19.9402	24.794	24.6469	23.5683	23.3456				+	Ctrl_Cyt_Fe_Cyt	2.48946	0.0377734	-3.31332	-4.72537	8	8	8	59.2	59.2	59.2	16.882	0.00043085	24.447	83406000	46	A0A6N4CMM1	A0A6N4CMM1	113
A0A6N4CR91	Probable transcriptional regulatory protein ASJ32_21040	ASJ32_21040 GO994_14275	OTHER	Unknown	K	Transcriptional regulatory protein	27.2598	27.5227	27.4207	27.3596	27.7363	28.4205	28.5254	28.2904	27.2598	27.5227	27.4207	27.3596	27.7363	28.4205	28.5254	28.2904				+	Ctrl_Cyt_Fe_Cyt	2.44684	0.0408955	-0.852459	-4.63098	16	16	16	69.5	69.5	69.5	26.177	0	323.31	3255900000	1035	A0A6N4CR91	A0A6N4CR91	600
A0A6N4CY81	7-methyl-GTP pyrophosphatase (m(7)GTP pyrophosphatase) (EC 3.6.1.-)	ASJ32_12775 GO994_11670	OTHER	Cytoplasmic	D	Maf-like protein	NaN	21.9847	NaN	NaN	22.8756	23.2504	22.9886	22.8316	20.1351	21.9847	19.4345	20.1773	22.8756	23.2504	22.9886	22.8316				+	Ctrl_Cyt_Fe_Cyt	2.44223	0.0408955	-2.55365	-4.62084	15	15	15	78.2	78.2	78.2	20.73	0	98.726	202440000	119	A0A6N4CY81	A0A6N4CY81	2100
A0A6N4CWY1	Uncharacterized protein	ASJ32_13525	OTHER	Unknown	S	HutD	23.5665	24.1286	23.8478	23.6155	25.0016	24.5028	25.7369	25.1924	23.5665	24.1286	23.8478	23.6155	25.0016	24.5028	25.7369	25.1924				+	Ctrl_Cyt_Fe_Cyt	2.44107	0.0408955	-1.31882	-4.61829	11	11	11	63.8	63.8	63.8	20.42	0	216.7	265060000	163	A0A6N4CWY1	A0A6N4CWY1	1844
A0A6N4CW95	ATP phosphoribosyltransferase (ATP-PRT) (ATP-PRTase) (EC 2.4.2.17)	hisG ASJ32_12580 GO994_11870	OTHER	Cytoplasmic	F	Catalyzes the condensation of ATP and 5-phosphoribose 1- diphosphate to form N'-(5'-phosphoribosyl)-ATP (PR-ATP). Has a crucial role in the pathway because the rate of histidine biosynthesis seems to be controlled primarily by regulation of HisG enzymatic activity	27.6382	27.6682	27.06	27.8269	28.1466	28.5567	28.5169	28.6252	27.6382	27.6682	27.06	27.8269	28.1466	28.5567	28.5169	28.6252				+	Ctrl_Cyt_Fe_Cyt	2.4244	0.042164	-0.913043	-4.58175	42	42	42	84.2	84.2	84.2	32.595	0	323.31	15523000000	3596	A0A6N4CW95	A0A6N4CW95	1703
A0A6N4CY51	SAM-dependent methyltransferase	ASJ32_10430	OTHER	Cytoplasmic	H	DinB superfamily	23.4937	23.1909	22.0443	22.8146	24.1195	24.6545	25.1874	24.5286	23.4937	23.1909	22.0443	22.8146	24.1195	24.6545	25.1874	24.5286				+	Ctrl_Cyt_Fe_Cyt	2.40399	0.0428532	-1.73661	-4.53727	29	29	29	53.6	53.6	53.6	78.699	0	323.31	768640000	397	A0A6N4CY51	A0A6N4CY51	2082
A0A6N4CQL6	Chaperone protein ClpB	clpB ASJ32_07495	OTHER	Cytoplasmic	O	Part of a stress-induced multi-chaperone system, it is involved in the recovery of the cell from heat-induced damage, in cooperation with DnaK, DnaJ and GrpE	25.2415	24.688	24.8325	25.6256	26.5602	26.5552	25.997	26.0326	25.2415	24.688	24.8325	25.6256	26.5602	26.5552	25.997	26.0326				+	Ctrl_Cyt_Fe_Cyt	2.39341	0.0435805	-1.18934	-4.5143	105	105	105	85.8	85.8	85.8	95.617	0	323.31	7041400000	2854	A0A6N4CQL6	A0A6N4CQL6	471
A0A6N4CU59	Peptide ABC transporter substrate-binding protein	ASJ32_04880	SP(Sec/SPI)	Periplasmic	E	Bacterial extracellular solute-binding proteins, family 5 Middle	24.8779	24.6568	24.6872	23.8428	25.6638	25.6277	25.7311	25.3891	24.8779	24.6568	24.6872	23.8428	25.6638	25.6277	25.7311	25.3891				+	Ctrl_Cyt_Fe_Cyt	2.38685	0.0439132	-1.08675	-4.50011	34	34	34	59.3	59.3	59.3	68.819	0	241.88	622420000	435	A0A6N4CU59	A0A6N4CU59	1235
A0A6N4CWB0	Pseudaminic acid synthase	ASJ32_13985	OTHER	Unknown	M	NeuB family	21.9189	22.5502	22.0179	21.8798	22.8344	22.8633	22.9704	22.6793	21.9189	22.5502	22.0179	21.8798	22.8344	22.8633	22.9704	22.6793				+	Ctrl_Cyt_Fe_Cyt	2.37179	0.0447937	-0.745158	-4.46762	8	8	8	31	31	31	37.635	0	163.65	60017000	57	A0A6N4CWB0	A0A6N4CWB0	1711
A0A6N4CWJ9	Glutathione S-transferase	ASJ32_13090 GO994_10605	OTHER	Cytoplasmic	H	Glutathione S-transferase, C-terminal domain	23.7385	23.2418	23.1921	22.9933	25.5323	24.4092	25.5425	24.3296	23.7385	23.2418	23.1921	22.9933	25.5323	24.4092	25.5425	24.3296				+	Ctrl_Cyt_Fe_Cyt	2.36694	0.0449662	-1.66198	-4.45719	18	18	18	86.3	86.3	86.3	22.494	0	323.31	816860000	419	A0A6N4CWJ9	A0A6N4CWJ9	1757
A0A6N4CYM2	Isochorismatase	ASJ32_09650 GO994_22195	OTHER	Unknown	Q	Phosphopantetheine attachment site	NaN	NaN	NaN	NaN	24.0014	22.2847	22.7671	20.9695	19.5926	20.2168	19.1295	19.2028	24.0014	22.2847	22.7671	20.9695				+	Ctrl_Cyt_Fe_Cyt	2.34237	0.0466935	-2.97029	-4.40454	7	7	7	57.8	57.8	57.8	9.78	0	48.337	176350000	56	A0A6N4CYM2	A0A6N4CYM2	2184
A0A6N4CTT3	YhcH/YjgK/YiaL family protein	ASJ32_18220 GO994_03510	OTHER	Unknown	G	Domain of unknown function (DUF386)	NaN	NaN	NaN	NaN	21.6344	21.5762	22.3847	21.4465	21.0096	19.8077	19.5629	19.6824	21.6344	21.5762	22.3847	21.4465				+	Ctrl_Cyt_Fe_Cyt	2.34116	0.0466935	-1.74482	-4.40198	3	3	3	27.6	27.6	27.6	17.402	0	87.752	47385000	28	A0A6N4CTT3	A0A6N4CTT3	1161
A0A6N4CV34	Uncharacterized protein	ASJ32_14185	SP(Sec/SPI)	CytoplasmicMembrane	S	(twin-arginine translocation) pathway signal	23.4003	23.477	21.9232	21.697	25.3947	25.5175	25.5646	24.1613	23.4003	23.477	21.9232	21.697	25.3947	25.5175	25.5646	24.1613				+	Ctrl_Cyt_Fe_Cyt	2.32967	0.047187	-2.53514	-4.37748	19	19	19	56.7	56.7	56.7	28.208	0	323.31	414620000	234	A0A6N4CV34	A0A6N4CV34	1440
A0A6N4CSR2	Leucine ABC transporter substrate-binding protein	ASJ32_15390	SP(Sec/SPI)	Periplasmic	E	Leucine ABC transporter subunit substrate-binding protein LivK	25.4522	25.52	26.1648	25.4188	26.6369	26.4954	27.1053	26.4169	25.4522	25.52	26.1648	25.4188	26.6369	26.4954	27.1053	26.4169				+	Ctrl_Cyt_Fe_Cyt	2.32739	0.047187	-1.02467	-4.37264	40	40	40	86.6	86.6	86.6	38.954	0	323.31	2767200000	1136	A0A6N4CSR2	A0A6N4CSR2	902
A0A6N4CTP3	Octanoyltransferase (EC 2.3.1.181) (Lipoate-protein ligase B) (Lipoyl/octanoyl transferase) (Octanoyl-[acyl-carrier-protein]-protein N-octanoyltransferase)	lipB ASJ32_16970	OTHER	Cytoplasmic	H	Catalyzes the transfer of endogenously produced octanoic acid from octanoyl-acyl-carrier-protein onto the lipoyl domains of lipoate-dependent enzymes. Lipoyl-ACP can also act as a substrate although octanoyl-ACP is likely to be the physiological substrate	24.0287	23.9781	24.1703	24.205	25.3905	24.8398	25.022	24.4953	24.0287	23.9781	24.1703	24.205	25.3905	24.8398	25.022	24.4953				+	Ctrl_Cyt_Fe_Cyt	2.30682	0.048866	-0.84135	-4.32904	10	10	10	45.8	45.8	45.8	24.367	0	134.03	942720000	448	A0A6N4CTP3	A0A6N4CTP3	1136
A0A6N4CZX6	Oligopeptide ABC transporter substrate-binding protein OppA (Peptide ABC transporter substrate-binding protein)	ASJ32_10165 GO994_08325	SP(Sec/SPI)	Periplasmic	E	Bacterial extracellular solute-binding proteins, family 5 Middle	27.4478	27.851	27.4025	26.6608	29.0555	28.574	28.669	28.2422	27.4478	27.851	27.4025	26.6608	29.0555	28.574	28.669	28.2422				+	Ctrl_Cyt_Fe_Cyt	2.30617	0.048866	-1.29463	-4.32769	90	90	90	91.1	91.1	91.1	60.697	0	323.31	16645000000	5347	A0A6N4CZX6	A0A6N4CZX6	2421
A0A6N4CZE6	Glutathione reductase (Glutathione-disulfide reductase) (EC 1.8.1.7)	gorA ASJ32_09500 GO994_00115	OTHER	Cytoplasmic	C	Belongs to the class-I pyridine nucleotide-disulfide oxidoreductase family	25.7114	26.0319	25.5219	24.7918	26.7061	26.7594	26.5573	26.6213	25.7114	26.0319	25.5219	24.7918	26.7061	26.7594	26.5573	26.6213				+	Ctrl_Cyt_Fe_Cyt	2.29387	0.0489207	-1.14679	-4.30174	34	34	34	66.8	66.8	66.8	48.568	0	323.31	2518200000	1172	A0A6N4CZE6	A0A6N4CZE6	2330
A0A6N4CYV3	Peptidase S66	ASJ32_01835	OTHER	Cytoplasmic	V	LD-carboxypeptidase	20.8541	21.4367	21.2246	20.0558	22.5882	23.0143	24.383	22.5788	20.8541	21.4367	21.2246	20.0558	22.5882	23.0143	24.383	22.5788				+	Ctrl_Cyt_Fe_Cyt	2.29061	0.0489605	-2.24825	-4.29488	12	12	12	37.4	37.4	37.4	36.623	0	71.751	161190000	195	A0A6N4CYV3	A0A6N4CYV3	2229
A0A6N4CQM6	Sugar fermentation stimulation protein homolog	sfsA ASJ32_18620 GO994_17780	OTHER	Cytoplasmic	S	Belongs to the SfsA family	NaN	NaN	NaN	22.0943	23.3192	23.3934	23.0679	22.886	19.5603	19.8999	18.781	22.0943	23.3192	23.3934	23.0679	22.886				+	Ctrl_Cyt_Fe_Cyt	2.28596	0.0491598	-3.08272	-4.28511	10	10	10	62.3	62.3	62.3	27.481	0	101.43	326870000	176	A0A6N4CQM6	A0A6N4CQM6	477
A0A6N4CRB6	Anthranilate synthase component 1 (EC 4.1.3.27)	ASJ32_20990 GO994_15855	OTHER	Cytoplasmic	E	Anthranilate synthase component I, N terminal region	24.2087	24.5676	24.1401	24.0523	24.6095	24.8599	24.8721	24.8234	24.2087	24.5676	24.1401	24.0523	24.6095	24.8599	24.8721	24.8234				+	Ctrl_Cyt_Fe_Cyt	2.27662	0.0493035	-0.549063	-4.26552	43	43	43	70.8	70.8	70.8	59.814	0	323.31	2033300000	1112	A0A6N4CRB6	A0A6N4CRB6	615
A0A6N4CYF4	Outer-membrane lipoprotein carrier protein	lolA ASJ32_11810	SP(Sec/SPI)	Periplasmic	M	Participates in the translocation of lipoproteins from the inner membrane to the outer membrane. Only forms a complex with a lipoprotein if the residue after the N-terminal Cys is not an aspartate (The Asp acts as a targeting signal to indicate that the lipoprotein should stay in the inner membrane)	25.3206	25.7185	25.3138	25.3734	26.085	25.8909	26.5477	26.0933	25.3206	25.7185	25.3138	25.3734	26.085	25.8909	26.5477	26.0933				+	Ctrl_Cyt_Fe_Cyt	2.27615	0.0493035	-0.722651	-4.26453	21	21	21	84.2	84.2	84.2	22.88	0	323.31	1357200000	672	A0A6N4CYF4	A0A6N4CYF4	2146
A0A6P1HBC7	Ribosomal protein S12 methylthiotransferase RimO (S12 MTTase) (S12 methylthiotransferase) (EC 2.8.4.4) (Ribosomal protein S12 (aspartate-C(3))-methylthiotransferase) (Ribosome maturation factor RimO)	rimO ASJ32_14155 GO994_14485	OTHER	Cytoplasmic	J	Catalyzes the methylthiolation of an aspartic acid residue of ribosomal protein S12	30.2633	29.8741	30.9449	29.9647	28.9658	28.751	29.4571	28.5139	30.2633	29.8741	30.9449	29.9647	28.9658	28.751	29.4571	28.5139				+	Ctrl_Cyt_Fe_Cyt	2.27204	0.0494516	1.33979	4.25592	42	42	42	75.3	75.3	75.3	49.525	0	323.31	14562000000	1596	A0A6P1HBC7	A0A6P1HBC7	2702
A0A6N4CZD9	Periplasmic nitrate reductase (EC 1.9.6.1)	napA ASJ32_02760 GO994_09375	TAT(Tat/SPI)	Periplasmic	C	nitrate reductase (NAP). Only expressed at high levels during aerobic growth. NapAB complex receives electrons from the membrane-anchored tetraheme protein NapC	22.6767	22.4509	22.0814	21.4799	20.5021	18.4036	20.364	20.0152	22.6767	22.4509	22.0814	21.4799	20.5021	18.4036	20.364	20.0152				+	Ctrl_Cyt_Fe_Cyt	2.28223	0.049258	2.35099	4.27727	42	42	42	50.7	50.7	50.7	92.834	0	313.38	322530000	471	A0A6N4CZD9	A0A6N4CZD9	2326
A0A6N4CUK5	Glutaminase (EC 3.5.1.2)	glsA ASJ32_05105	OTHER	Cytoplasmic	E	Belongs to the glutaminase family	22.3501	21.981	22.9444	22.4901	21.6399	21.624	21.1978	21.0988	22.3501	21.981	22.9444	22.4901	21.6399	21.624	21.1978	21.0988				+	Ctrl_Cyt_Fe_Cyt	2.29678	0.0489207	1.05126	4.30787	21	21	21	70.3	70.3	70.3	32.824	0	323.31	542540000	416	A0A6N4CUK5	A0A6N4CUK5	1332
A0A6N4CVA2	MarR family transcriptional regulator	ASJ32_03245	OTHER	Unknown	K	helix_turn_helix multiple antibiotic resistance protein	24.1545	23.8847	24.6893	24.779	23.0227	23.4589	23.531	23.3202	24.1545	23.8847	24.6893	24.779	23.0227	23.4589	23.531	23.3202				+	Ctrl_Cyt_Fe_Cyt	2.29962	0.0489207	1.04369	4.31385	12	12	12	75.5	75.5	75.5	17.932	0	93.282	527220000	333	A0A6N4CVA2	A0A6N4CVA2	1484
A0A6N4CZW1	Channel protein TolC (TolC family outer membrane protein)	ASJ32_10305 GO994_08170	SP(Sec/SPI)	OuterMembrane	MU	type I secretion outer membrane protein, TolC	27.1276	27.4201	27.9509	27.7253	26.6181	26.6958	26.5551	26.9354	27.1276	27.4201	27.9509	27.7253	26.6181	26.6958	26.5551	26.9354				+	Ctrl_Cyt_Fe_Cyt	2.30296	0.048892	0.854928	4.3209	96	96	96	91.4	91.4	91.4	49.03	0	323.31	206730000000	30657	A0A6N4CZW1	A0A6N4CZW1	2415
A0A6N4CSP4	NADH-quinone oxidoreductase subunit F (EC 7.1.1.-)	ASJ32_09995	OTHER	Cytoplasmic	C	NDH-1 shuttles electrons from NADH, via FMN and iron- sulfur (Fe-S) centers, to quinones in the respiratory chain	21.8462	21.3336	22.4284	22.0016	NaN	NaN	NaN	NaN	21.8462	21.3336	22.4284	22.0016	20.3594	20.8458	20.9858	20.7991				+	Ctrl_Cyt_Fe_Cyt	2.33259	0.047187	1.15491	4.3837	24	24	24	70.3	70.3	70.3	50.164	0	91.278	89656000	116	A0A6N4CSP4	A0A6N4CSP4	891
A0A6N4CQ26	Carbamoyl-phosphate synthase large chain (EC 6.3.5.5) (Carbamoyl-phosphate synthetase ammonia chain)	carB ASJ32_19535	LIPO(Sec/SPII)	Unknown	F	Carbamoyl-phosphate synthetase ammonia chain	28.2838	28.0686	28.8319	28.7315	27.4865	27.3911	27.8622	27.4784	28.2838	28.0686	28.8319	28.7315	27.4865	27.3911	27.8622	27.4784				+	Ctrl_Cyt_Fe_Cyt	2.34606	0.0466935	0.924381	4.41242	131	131	131	79.7	79.7	79.7	117.76	0	323.31	69500000000	13559	A0A6N4CQ26	A0A6N4CQ26	376
A0A6N4CT47	ABC transporter (ATP-binding cassette domain-containing protein)	ASJ32_18575 GO994_17825	OTHER	CytoplasmicMembrane	V	AAA domain, putative AbiEii toxin, Type IV TA system	21.7018	22.4165	22.1715	22.2689	21.0224	NaN	NaN	21.2185	21.7018	22.4165	22.1715	22.2689	21.0224	20.4169	19.9151	21.2185				+	Ctrl_Cyt_Fe_Cyt	2.37507	0.0447859	1.49648	4.47469	34	34	34	82	82	82	34.13	0	323.31	1534600000	790	A0A6N4CT47	A0A6N4CT47	995
A0A6N4CYG3	Glutamate synthase (Glutamate synthase large subunit) (EC 1.4.1.13)	gltB ASJ32_10325 GO994_08150	OTHER	Cytoplasmic	E	glutamate synthase	27.9828	28.3905	28.2699	27.8953	27.3224	27.6927	27.122	27.3829	27.9828	28.3905	28.2699	27.8953	27.3224	27.6927	27.122	27.3829				+	Ctrl_Cyt_Fe_Cyt	2.40466	0.0428532	0.75466	4.53872	154	154	153	82.4	82.4	82.4	162.62	0	323.31	35170000000	10603	A0A6N4CYG3	A0A6N4CYG3	2152
A0A6N4D0D5	30S ribosomal protein S2	rpsB ASJ32_01290 GO994_06800	OTHER	Cytoplasmic	J	Belongs to the universal ribosomal protein uS2 family	28.7017	28.7465	28.4294	29.3317	27.6034	26.7519	27.0908	27.9116	28.7017	28.7465	28.4294	29.3317	27.6034	26.7519	27.0908	27.9116				+	Ctrl_Cyt_Fe_Cyt	2.41306	0.0426131	1.46287	4.55701	44	44	44	98.8	98.8	98.8	26.912	0	323.31	111720000000	18777	A0A6N4D0D5	A0A6N4D0D5	2494
A0A6N4CVR1	Cytochrome C	ASJ32_13700	SP(Sec/SPI)	Periplasmic	C	Cytochrome C oxidase, cbb3-type, subunit III	21.4755	21.4498	21.3564	21.9253	21.0817	NaN	NaN	NaN	21.4755	21.4498	21.3564	21.9253	21.0817	20.7275	20.5597	20.4836				+	Ctrl_Cyt_Fe_Cyt	2.41369	0.0426131	0.838607	4.55836	9	9	9	68.2	68.2	68.2	15.633	0	137.85	95552000	133	A0A6N4CVR1	A0A6N4CVR1	1586
A0A6N4D0X2	Na(+)-translocating NADH-quinone reductase subunit A (Na(+)-NQR subunit A) (Na(+)-translocating NQR subunit A) (EC 7.2.1.1) (NQR complex subunit A) (NQR-1 subunit A)	nqrA ASJ32_01100	OTHER	Cytoplasmic	C	NQR complex catalyzes the reduction of ubiquinone-1 to ubiquinol by two successive reactions, coupled with the transport of Na( ) ions from the cytoplasm to the periplasm. NqrA to NqrE are probably involved in the second step, the conversion of ubisemiquinone to ubiquinol	25.9328	26.072	26.2983	25.9056	25.396	24.2638	23.8996	24.4343	25.9328	26.072	26.2983	25.9056	25.396	24.2638	23.8996	24.4343				+	Ctrl_Cyt_Fe_Cyt	2.47103	0.0390925	1.55377	4.68442	58	58	58	94.6	94.6	94.6	48.791	0	323.31	24478000000	4490	A0A6N4D0X2	A0A6N4D0X2	2533
A0A6N4CPR7	Aspartate carbamoyltransferase regulatory chain	pyrI ASJ32_07590	OTHER	Cytoplasmic	F	Involved in allosteric regulation of aspartate carbamoyltransferase	26.1169	26.4187	26.1146	25.7635	25.2384	25.1017	25.4998	25.462	26.1169	26.4187	26.1146	25.7635	25.2384	25.1017	25.4998	25.462				+	Ctrl_Cyt_Fe_Cyt	2.50044	0.0372816	0.777951	4.74988	22	22	22	97.4	97.4	97.4	17.456	0	323.31	4487100000	1421	A0A6N4CPR7	A0A6N4CPR7	328
A0A6N4CTE6	SAM-dependent methyltransferase	ASJ32_14405	OTHER	Cytoplasmic	J	Belongs to the class I-like SAM-binding methyltransferase superfamily. RsmB NOP family	26.2037	25.939	26.5112	26.5922	25.5724	24.5124	25.1062	24.6407	26.2037	25.939	26.5112	26.5922	25.5724	24.5124	25.1062	24.6407				+	Ctrl_Cyt_Fe_Cyt	2.50785	0.0372816	1.35358	4.76648	56	56	56	92.1	92.1	92.1	44.907	0	323.31	7051400000	2653	A0A6N4CTE6	A0A6N4CTE6	1065
A0A6N4CVE4	Dihydrolipoyl dehydrogenase (EC 1.8.1.4)	lpdA ASJ32_15000 GO994_02485	OTHER	Cytoplasmic	C	COG1249 Pyruvate 2-oxoglutarate dehydrogenase complex, dihydrolipoamide dehydrogenase (E3) component, and related enzymes	29.191	29.5921	29.6692	29.2032	28.788	28.3688	28.0704	28.6035	29.191	29.5921	29.6692	29.2032	28.788	28.3688	28.0704	28.6035				+	Ctrl_Cyt_Fe_Cyt	2.51592	0.0372816	0.956212	4.7846	68	68	68	74.3	74.3	74.3	50.368	0	323.31	52860000000	10099	A0A6N4CVE4	A0A6N4CVE4	1510
A0A6N4CQ64	Oxoglutarate dehydrogenase (succinyl-transferring) (EC 1.2.4.2)	ASJ32_06735	OTHER	Cytoplasmic	C	dehydrogenase, E1 component	26.5402	26.7274	27.2739	26.8387	25.6555	25.923	25.9324	26.1896	26.5402	26.7274	27.2739	26.8387	25.6555	25.923	25.9324	26.1896				+	Ctrl_Cyt_Fe_Cyt	2.54083	0.0365294	0.919958	4.84077	107	107	107	81.8	81.8	81.8	104.72	0	323.31	19785000000	5383	A0A6N4CQ64	A0A6N4CQ64	397
A0A6N4CXN4	50S ribosomal protein L31	rpmE ASJ32_13900 GO994_21265	OTHER	Cytoplasmic	J	Binds the 23S rRNA	24.7379	24.5491	24.1911	25.7851	22.8376	22.5991	22.3478	23.4107	24.7379	24.5491	24.1911	25.7851	22.8376	22.5991	22.3478	23.4107				+	Ctrl_Cyt_Fe_Cyt	2.57073	0.0356776	2.01699	4.90877	15	15	15	100	100	100	7.6578	0	323.31	2596500000	954	A0A6N4CXN4	A0A6N4CXN4	1986
A0A6N4CSQ0	Carbamoyl-phosphate synthase small chain (EC 6.3.5.5) (Carbamoyl-phosphate synthetase glutamine chain)	carA ASJ32_19540 GO994_08045	OTHER	Cytoplasmic	F	Carbamoyl-phosphate synthetase glutamine chain	26.9254	26.8839	27.5473	27.3315	26.2154	26.0583	26.4358	26.3826	26.9254	26.8839	27.5473	27.3315	26.2154	26.0583	26.4358	26.3826				+	Ctrl_Cyt_Fe_Cyt	2.5826	0.0350401	0.899004	4.93594	34	34	34	75.5	75.5	75.5	41.484	0	323.31	9545200000	2608	A0A6N4CSQ0	A0A6N4CSQ0	895
A0A6P1H7A5	Biotin synthase (EC 2.8.1.6)	bioB ASJ32_18050 GO994_07515	OTHER	Cytoplasmic	H	Catalyzes the conversion of dethiobiotin (DTB) to biotin by the insertion of a sulfur atom into dethiobiotin via a radical- based mechanism	24.9517	24.3187	23.8576	24.5153	22.9276	20.8274	22.0795	21.1689	24.9517	24.3187	23.8576	24.5153	22.9276	20.8274	22.0795	21.1689				+	Ctrl_Cyt_Fe_Cyt	2.64087	0.0327856	2.65994	5.07075	29	29	29	81.2	81.2	81.2	40.455	0	323.31	997000000	686	A0A6P1H7A5	A0A6P1H7A5	2632
A0A6P1H644	Succinate dehydrogenase iron-sulfur subunit (EC 1.3.5.1)	sdhB ASJ32_06730 GO994_10845	OTHER	CytoplasmicMembrane	C	Belongs to the succinate dehydrogenase fumarate reductase iron-sulfur protein family	23.6317	22.7724	23.622	23.3348	22.2457	20.8189	21.5676	21.0531	23.6317	22.7724	23.622	23.3348	22.2457	20.8189	21.5676	21.0531				+	Ctrl_Cyt_Fe_Cyt	2.66149	0.0315811	1.91889	5.11904	27	27	27	88.2	88.2	88.2	26.692	0	323.31	1563400000	821	A0A6P1H644	A0A6P1H644	2607
A0A6N4CYB5	30S ribosomal protein S3	rpsC ASJ32_10935 GO994_01175	OTHER	Cytoplasmic	J	Binds the lower part of the 30S subunit head. Binds mRNA in the 70S ribosome, positioning it for translation	27.5269	27.2827	27.4455	28.0789	26.7117	26.3008	25.8654	26.394	27.5269	27.2827	27.4455	28.0789	26.7117	26.3008	25.8654	26.394				+	Ctrl_Cyt_Fe_Cyt	2.67538	0.030899	1.2655	5.15175	50	50	50	93.2	93.2	93.2	26.106	0	323.31	72264000000	7968	A0A6N4CYB5	A0A6N4CYB5	2121
A0A6N4CSK5	50S ribosomal protein L14	rplN ASJ32_10955 GO994_01195	OTHER	Cytoplasmic	J	Binds to 23S rRNA. Forms part of two intersubunit bridges in the 70S ribosome	26.2594	26.1728	26.421	26.9076	25.681	25.4114	25.5427	25.5212	26.2594	26.1728	26.421	26.9076	25.681	25.4114	25.5427	25.5212				+	Ctrl_Cyt_Fe_Cyt	2.69768	0.0296548	0.901149	5.20456	28	28	28	99.2	99.2	99.2	13.403	0	323.31	49626000000	9154	A0A6N4CSK5	A0A6N4CSK5	867
A0A6N4CXC7	50S ribosomal protein L4	rplD ASJ32_10910 GO994_01150	OTHER	Cytoplasmic	J	One of the primary rRNA binding proteins, this protein initially binds near the 5'-end of the 23S rRNA. It is important during the early stages of 50S assembly. It makes multiple contacts with different domains of the 23S rRNA in the assembled 50S subunit and ribosome	29.7607	29.2767	28.9853	29.9525	27.8921	27.1342	28.2613	27.8789	29.7607	29.2767	28.9853	29.9525	27.8921	27.1342	28.2613	27.8789				+	Ctrl_Cyt_Fe_Cyt	2.71986	0.0287717	1.70219	5.25745	47	47	47	97	97	97	22.211	0	323.31	93063000000	8878	A0A6N4CXC7	A0A6N4CXC7	1923
A0A6N4CTX0	6,7-dimethyl-8-ribityllumazine synthase (DMRL synthase) (LS) (Lumazine synthase) (EC 2.5.1.78)	ribH ASJ32_04400	OTHER	Cytoplasmic	H	Catalyzes the formation of 6,7-dimethyl-8- ribityllumazine by condensation of 5-amino-6-(D- ribitylamino)uracil with 3,4-dihydroxy-2-butanone 4-phosphate. This is the penultimate step in the biosynthesis of riboflavin	28.3106	28.4276	28.4924	28.209	27.6151	27.7283	27.4442	27.961	28.3106	28.4276	28.4924	28.209	27.6151	27.7283	27.4442	27.961				+	Ctrl_Cyt_Fe_Cyt	2.76721	0.027233	0.672749	5.37161	24	24	24	100	100	100	16.568	0	323.31	53710000000	6839	A0A6N4CTX0	A0A6N4CTX0	1185
A0A6N4CQ00	DNA-directed RNA polymerase subunit beta' (RNAP subunit beta') (EC 2.7.7.6) (RNA polymerase subunit beta') (Transcriptase subunit beta')	rpoC ASJ32_07310 GO994_01685	OTHER	Cytoplasmic	K	DNA-dependent RNA polymerase catalyzes the transcription of DNA into RNA using the four ribonucleoside triphosphates as substrates	29.8273	30.1228	29.9051	30.1822	29.245	29.5352	29.516	29.3682	29.8273	30.1228	29.9051	30.1822	29.245	29.5352	29.516	29.3682				+	Ctrl_Cyt_Fe_Cyt	2.79722	0.0257003	0.593262	5.44486	251	251	251	96.1	96.1	96.1	158.2	0	323.31	382240000000	59078	A0A6N4CQ00	A0A6N4CQ00	363
A0A6N4CY88	50S ribosomal protein L5	rplE ASJ32_10965 GO994_01205	OTHER	Cytoplasmic	J	This is 1 of the proteins that binds and probably mediates the attachment of the 5S RNA into the large ribosomal subunit, where it forms part of the central protuberance. In the 70S ribosome it contacts protein S13 of the 30S subunit (bridge B1b), connecting the 2 subunits	29.5402	29.1707	29.1498	29.7991	28.1616	27.3891	28.3383	27.9865	29.5402	29.1707	29.1498	29.7991	28.1616	27.3891	28.3383	27.9865				+	Ctrl_Cyt_Fe_Cyt	2.85552	0.0229885	1.44607	5.58918	46	46	46	99.4	99.4	99.4	20.24	0	323.31	119590000000	21394	A0A6N4CY88	A0A6N4CY88	2106
A0A6N4CXI5	Proline--tRNA ligase (EC 6.1.1.15) (Prolyl-tRNA synthetase) (ProRS)	proS ASJ32_04085 GO994_18055	OTHER	Cytoplasmic	J	Catalyzes the attachment of proline to tRNA(Pro) in a two-step reaction proline is first activated by ATP to form Pro- AMP and then transferred to the acceptor end of tRNA(Pro). As ProRS can inadvertently accommodate and process non-cognate amino acids such as alanine and cysteine, to avoid such errors it has two additional distinct editing activities against alanine. One activity is designated a…	28.2575	27.8843	28.4936	28.2792	27.1256	27.0146	26.7196	27.4937	28.2575	27.8843	28.4936	28.2792	27.1256	27.0146	26.7196	27.4937				+	Ctrl_Cyt_Fe_Cyt	2.85593	0.0229885	1.14026	5.59021	63	63	63	86.2	86.2	86.2	62.722	0	323.31	15117000000	3083	A0A6N4CXI5	A0A6N4CXI5	1955
A0A6N4CYI7	Glutamate synthase	ASJ32_10330	OTHER	Cytoplasmic	C	glutamate synthase	26.6747	26.9298	27.243	26.8576	26.2574	26.133	26.0374	26.2899	26.6747	26.9298	27.243	26.8576	26.2574	26.133	26.0374	26.2899				+	Ctrl_Cyt_Fe_Cyt	2.88339	0.0225322	0.746797	5.65914	51	51	51	82.2	82.2	82.2	51.753	0	323.31	9643200000	3378	A0A6N4CYI7	A0A6N4CYI7	2164
A0A6N4CPN0	DNA-directed RNA polymerase subunit beta (RNAP subunit beta) (EC 2.7.7.6) (RNA polymerase subunit beta) (Transcriptase subunit beta)	rpoB ASJ32_07315	OTHER	Cytoplasmic	K	DNA-dependent RNA polymerase catalyzes the transcription of DNA into RNA using the four ribonucleoside triphosphates as substrates	30.0566	30.3169	30.0705	30.0388	29.6014	29.7085	29.4896	29.7244	30.0566	30.3169	30.0705	30.0388	29.6014	29.7085	29.4896	29.7244				+	Ctrl_Cyt_Fe_Cyt	2.91397	0.021319	0.489705	5.73662	234	234	234	98.6	98.6	98.6	150.25	0	323.31	225870000000	39378	A0A6N4CPN0	A0A6N4CPN0	307
A0A6N4CVH0	Lipase	ASJ32_15345	LIPO(Sec/SPII)	Extracellular	I	Bacterial virulence factor lipase N-terminal	24.1374	23.8375	24.6538	23.8689	23.099	22.4341	22.7656	22.7481	24.1374	23.8375	24.6538	23.8689	23.099	22.4341	22.7656	22.7481				+	Ctrl_Cyt_Fe_Cyt	2.96124	0.0203618	1.36271	5.85794	42	42	42	68.4	68.4	68.4	82.553	0	323.31	9891500000	5056	A0A6N4CVH0	A0A6N4CVH0	1528
A0A6N4CR58	Ribosomal RNA large subunit methyltransferase K/L [Includes: 23S rRNA m2G2445 methyltransferase (EC 2.1.1.173) (rRNA (guanine-N(2)-)-methyltransferase RlmL); 23S rRNA m7G2069 methyltransferase (EC 2.1.1.264) (rRNA (guanine-N(7)-)-methyltransferase RlmK)]	rlmL ASJ32_12975	OTHER	Cytoplasmic	J	Specifically methylates the guanine in position 2445 (m2G2445) and the guanine in position 2069 (m7G2069) of 23S rRNA	26.5206	26.3246	26.8788	26.373	25.6077	25.8701	25.7287	25.6166	26.5206	26.3246	26.8788	26.373	25.6077	25.8701	25.7287	25.6166				+	Ctrl_Cyt_Fe_Cyt	2.96461	0.0203618	0.818448	5.86664	88	88	88	79.5	79.5	79.5	82.677	0	323.31	12799000000	4439	A0A6N4CR58	A0A6N4CR58	581
A0A6N4CR71	Peptidoglycan-binding protein	ASJ32_17780	LIPO(Sec/SPII)	OuterMembrane	M	Lysin motif	23.8461	25.3477	27.2128	25.5159	NaN	NaN	NaN	NaN	23.8461	25.3477	27.2128	25.5159	21.1669	19.9247	21.3818	21.303				+	Ctrl_Cyt_Fe_Cyt	2.97658	0.0203618	4.53653	5.89769	41	41	41	87.4	87.4	87.4	37.285	0	323.31	4314300000	1611	A0A6N4CR71	A0A6N4CR71	587
A0A6N4CV55	TIGR04219 family outer membrane beta-barrel protein	ASJ32_15825 GO994_18730	SP(Sec/SPI)	Unknown	M	Has lipid A 3-O-deacylase activity. Hydrolyzes the ester bond at the 3 position of lipid A, a bioactive component of lipopolysaccharide (LPS), thereby releasing the primary fatty acyl moiety	23.8197	23.992	24.5765	24.1479	22.8539	22.2202	NaN	22.6064	23.8197	23.992	24.5765	24.1479	22.8539	22.2202	21.774	22.6064				+	Ctrl_Cyt_Fe_Cyt	3.08592	0.0178272	1.77037	6.18711	26	26	26	65.1	65.1	65.1	23.121	0	323.31	39528000000	5366	A0A6N4CV55	A0A6N4CV55	1454
A0A6N4CSZ4	23S rRNA (uracil(1939)-C(5))-methyltransferase RlmD (EC 2.1.1.190) (23S rRNA(m5U1939)-methyltransferase)	rumA rlmD ASJ32_17720	OTHER	Cytoplasmic	J	Catalyzes the formation of 5-methyl-uridine at position 1939 (m5U1939) in 23S rRNA	23.1294	23.9449	23.3203	23.2847	22.4158	21.9949	21.9672	21.807	23.1294	23.9449	23.3203	23.2847	22.4158	21.9949	21.9672	21.807				+	Ctrl_Cyt_Fe_Cyt	3.08713	0.0178272	1.37363	6.19036	33	33	33	77.7	77.7	77.7	48.418	0	323.31	1606400000	819	A0A6N4CSZ4	A0A6N4CSZ4	963
A0A6N4CS30	Formimidoylglutamase (EC 3.5.3.8) (Formiminoglutamase) (Formiminoglutamate hydrolase)	hutG ASJ32_06375	OTHER	Cytoplasmic	E	Catalyzes the conversion of N-formimidoyl-L-glutamate to L-glutamate and formamide	23.0287	22.4444	22.9588	23.3202	20.5617	NaN	21.6083	20.4804	23.0287	22.4444	22.9588	23.3202	20.5617	21.09	21.6083	20.4804				+	Ctrl_Cyt_Fe_Cyt	3.11914	0.0175801	2.0029	6.27713	15	15	15	59.9	59.9	59.9	33.866	0	168	326170000	267	A0A6N4CS30	A0A6N4CS30	761
A0A6P1H5X9	tRNA N6-adenosine threonylcarbamoyltransferase (EC 2.3.1.234) (N6-L-threonylcarbamoyladenine synthase) (t(6)A synthase) (t(6)A37 threonylcarbamoyladenosine biosynthesis protein TsaD) (tRNA threonylcarbamoyladenosine biosynthesis protein TsaD)	tsaD ASJ32_17790 GO994_03995	OTHER	Extracellular	J	Required for the formation of a threonylcarbamoyl group on adenosine at position 37 (t(6)A37) in tRNAs that read codons beginning with adenine. Is involved in the transfer of the threonylcarbamoyl moiety of threonylcarbamoyl-AMP (TC-AMP) to the N6 group of A37, together with TsaE and TsaB. TsaD likely plays a direct catalytic role in this reaction	22.4928	22.2855	22.8044	22.7776	21.4721	21.3919	21.6699	21.8172	22.4928	22.2855	22.8044	22.7776	21.4721	21.3919	21.6699	21.8172				+	Ctrl_Cyt_Fe_Cyt	3.16314	0.016604	1.00229	6.39794	21	21	21	64.7	64.7	64.7	36.146	0	323.31	843630000	553	A0A6P1H5X9	A0A6P1H5X9	2604
A0A6N4CSJ5	Poly(A) polymerase I (PAP I) (EC 2.7.7.19)	pcnB ASJ32_18605	OTHER	Cytoplasmic	J	Adds poly(A) tail to the 3' end of many RNAs, which usually targets these RNAs for decay. Plays a significant role in the global control of gene expression, through influencing the rate of transcript degradation, and in the general RNA quality control	25.9675	25.4882	25.7126	25.5483	24.8717	24.174	24.2534	24.2308	25.9675	25.4882	25.7126	25.5483	24.8717	24.174	24.2534	24.2308				+	Ctrl_Cyt_Fe_Cyt	3.24253	0.0146497	1.29666	6.62048	63	63	63	76.7	76.7	76.7	56.677	0	323.31	9169900000	2530	A0A6N4CSJ5	A0A6N4CSJ5	861
A0A6N4CXG9	NADH-quinone oxidoreductase (EC 7.1.1.-)	ASJ32_10000	OTHER	Cytoplasmic	C	NADH-quinone oxidoreductase	22.3105	22.5487	23.1979	22.726	20.407	20.9673	20.6709	21.3117	22.3105	22.5487	23.1979	22.726	20.407	20.9673	20.6709	21.3117				+	Ctrl_Cyt_Fe_Cyt	3.32692	0.0127455	1.85654	6.86369	35	35	35	59.7	59.7	59.7	100.98	0	323.31	428320000	448	A0A6N4CXG9	A0A6N4CXG9	1950
A0A6N4CW55	Aconitate hydratase B (EC 4.2.1.3) (EC 4.2.1.99) (2-methylisocitrate dehydratase)	ASJ32_14970	OTHER	Cytoplasmic	C	Belongs to the aconitase IPM isomerase family	28.6986	28.782	28.836	28.3434	27.7899	27.204	27.4352	27.1284	28.6986	28.782	28.836	28.3434	27.7899	27.204	27.4352	27.1284				+	Ctrl_Cyt_Fe_Cyt	3.33254	0.0127455	1.27564	6.88015	102	102	102	86.5	86.5	86.5	93.098	0	323.31	24099000000	6120	A0A6N4CW55	A0A6N4CW55	1677
A0A6N4CUM0	RNA methyltransferase	ASJ32_15620	OTHER	Cytoplasmic	J	Belongs to the class I-like SAM-binding methyltransferase superfamily. RNA M5U methyltransferase family	26.9301	26.772	26.8229	26.8788	23.9592	22.7557	23.9167	21.79	26.9301	26.772	26.8229	26.8788	23.9592	22.7557	23.9167	21.79				+	Ctrl_Cyt_Fe_Cyt	3.43743	0.0109114	3.74555	7.19304	34	34	34	76	76	76	49.467	0	323.31	5453400000	1649	A0A6N4CUM0	A0A6N4CUM0	1343
A0A6N4CSE6	Imidazolonepropionase (EC 3.5.2.7) (Imidazolone-5-propionate hydrolase)	hutI ASJ32_06380	OTHER	Cytoplasmic	F	imidazolonepropionase activity	23.0198	23.6061	23.5486	23.2166	21.9012	21.3432	21.9855	21.2421	23.0198	23.6061	23.5486	23.2166	21.9012	21.3432	21.9855	21.2421				+	Ctrl_Cyt_Fe_Cyt	3.48983	0.0105408	1.7298	7.35365	22	22	22	50.4	50.4	50.4	44.527	0	266.15	284860000	308	A0A6N4CSE6	A0A6N4CSE6	832
A0A6P1H621	Succinate dehydrogenase flavoprotein subunit (EC 1.3.5.1)	sdhA ASJ32_06725 GO994_10840	TAT(Tat/SPI)	CytoplasmicMembrane	C	Belongs to the FAD-dependent oxidoreductase 2 family. FRD SDH subfamily	26.793	26.9032	27.2039	26.482	25.5198	24.9813	25.5697	25.219	26.793	26.9032	27.2039	26.482	25.5198	24.9813	25.5697	25.219				+	Ctrl_Cyt_Fe_Cyt	3.5395	0.00962889	1.52309	7.50865	56	56	56	67	67	67	64.29	0	323.31	5688700000	2292	A0A6P1H621	A0A6P1H621	2605
A0A6N4CUX1	Nucleotide-binding protein	ASJ32_14610	OTHER	Cytoplasmic	J	S1 domain	25.6908	26.0704	26.1847	25.8199	24.8623	25.0651	24.8435	25.054	25.6908	26.0704	26.1847	25.8199	24.8623	25.0651	24.8435	25.054				+	Ctrl_Cyt_Fe_Cyt	3.60058	0.00922364	0.985297	7.70293	30	30	30	74.3	74.3	74.3	32.224	0	323.31	1140200000	496	A0A6N4CUX1	A0A6N4CUX1	1409
A0A6N4CU55	Adenine DNA glycosylase (EC 3.2.2.31)	mutY ASJ32_15980 GO994_19595	OTHER	Cytoplasmic	L	FES	23.7368	23.9849	24.2636	24.219	19.9996	21.5447	21.2695	21.3612	23.7368	23.9849	24.2636	24.219	19.9996	21.5447	21.2695	21.3612				+	Ctrl_Cyt_Fe_Cyt	3.71031	0.00776129	3.00727	8.06262	21	21	21	75.6	75.6	75.6	39.79	0	323.31	527250000	370	A0A6N4CU55	A0A6N4CU55	1231
A0A6N4CR79	Urocanate hydratase (Urocanase) (EC 4.2.1.49) (Imidazolonepropionate hydrolase)	hutU ASJ32_06370	OTHER	Cytoplasmic	H	Catalyzes the conversion of urocanate to 4-imidazolone- 5-propionate	28.096	28.1787	28.2726	28.2688	26.4967	26.9148	27.2248	27.0307	28.096	28.1787	28.2726	28.2688	26.4967	26.9148	27.2248	27.0307				+	Ctrl_Cyt_Fe_Cyt	3.71165	0.00776129	1.2873	8.0671	50	50	50	73.4	73.4	73.4	61.954	0	323.31	6602500000	2633	A0A6N4CR79	A0A6N4CR79	592
A0A6N4CSM1	Uncharacterized protein	ASJ32_19710 GO994_04050	SP(Sec/SPI)	Unknown	C	electron transfer activity	25.5308	25.6229	25.5879	25.7979	23.3217	22.9778	23.9213	22.9096	25.5308	25.6229	25.5879	25.7979	23.3217	22.9778	23.9213	22.9096				+	Ctrl_Cyt_Fe_Cyt	4.2053	0.00372427	2.35225	9.87203	23	23	23	70.2	70.2	70.2	13.887	0	323.31	3688300000	965	A0A6N4CSM1	A0A6N4CSM1	878
A0A6N4CRD4	Histidine ammonia-lyase (Histidase) (EC 4.3.1.3)	hutH ASJ32_06365	OTHER	Cytoplasmic	E	Aromatic amino acid lyase	26.225	26.0936	26.5983	25.8243	24.4046	24.3423	24.5674	24.1985	26.225	26.0936	26.5983	25.8243	24.4046	24.3423	24.5674	24.1985				+	Ctrl_Cyt_Fe_Cyt	4.27191	0.00348511	1.80706	10.1412	44	44	44	75.3	75.3	75.3	54.033	0	323.31	5628600000	2678	A0A6N4CRD4	A0A6N4CRD4	626
A0A6N4CX89	Cytochrome C	ASJ32_10700	SP(Sec/SPI)	Periplasmic	C	Cytochrome C oxidase, cbb3-type, subunit III	23.2221	23.4396	24.0247	23.5231	NaN	NaN	NaN	NaN	23.2221	23.4396	24.0247	23.5231	20.0995	19.9044	19.6018	20.3017				+	Ctrl_Cyt_Fe_Cyt	5.39445	0.000598827	3.57554	15.8293	25	25	25	94.6	94.6	94.6	21.23	0	323.31	938150000	734	A0A6N4CX89	A0A6N4CX89	1901
Inner membrane
Majority protein IDs	Protein names	Gene names	SignalP	PSORTb	COG Category	eggNOG description	LFQ intensity Ctrl1_IM	LFQ intensity Ctrl2_IM	LFQ intensity Ctrl3_IM	LFQ intensity Ctrl4_IM	LFQ intensity Fe1_IM	LFQ intensity Fe2_IM	LFQ intensity Fe3_IM	LFQ intensity Fe4_IM	LFQ intensity Ctrl1_IM Imputed	LFQ intensity Ctrl2_IM Imputed	LFQ intensity Ctrl3_IM Imputed	LFQ intensity Ctrl4_IM Imputed	LFQ intensity Fe1_IM Imputed	LFQ intensity Fe2_IM Imputed	LFQ intensity Fe3_IM Imputed	LFQ intensity Fe4_IM Imputed	Only identified by site	Reverse	Potential contaminant	Student's T-test Significant Ctrl_IM_Fe_IM	Student's T-test significant	-Log Student's T-test p-value Ctrl_IM_Fe_IM	Student's T-test q-value Ctrl_IM_Fe_IM	Student's T-test Difference Ctrl_IM_Fe_IM	Student's T-test Test statistic Ctrl_IM_Fe_IM	Peptides	Razor + unique peptides	Unique peptides	Sequence coverage [%]	Unique + razor sequence coverage [%]	Unique sequence coverage [%]	Mol. weight [kDa]	Q-value	Score	Intensity	MS/MS count	Protein IDs	Majority protein IDs	id
A0A6N4CYM8	ABC transporter substrate-binding protein (Ferric anguibactin-binding protein)	ASJ32_09700 GO994_22145	LIPO(Sec/SPII)	Unknown	P	Periplasmic binding protein	24.2646	24.2238	24.1497	24.5781	30.6104	30.6343	30.8708	31.0168	24.2646	24.2238	24.1497	24.5781	30.6104	30.6343	30.8708	31.0168				+	Ctrl_IM_Fe_IM	8.24581	1.07995e-05	-6.47906	-47.7183	32	32	32	82.4	82.4	82.4	35.811	0	323.31	20715000000	1726	A0A6N4CYM8	A0A6N4CYM8	2187
A0A6N4D025	ABC transporter ATP-binding protein (ATP-binding cassette domain-containing protein)	ASJ32_09680 GO994_22165	OTHER	CytoplasmicMembrane	V	(ABC) transporter	21.6865	NaN	21.8161	22.2052	29.2286	29.489	29.5737	29.3419	21.6865	21.2739	21.8161	22.2052	29.2286	29.489	29.5737	29.3419				+	Ctrl_IM_Fe_IM	7.58985	2.44532e-05	-7.66286	-37.0707	45	44	44	67.6	66.7	66.7	63.274	0	323.31	7171300000	770	A0A6N4D025	A0A6N4D025	2446
A0A6N4CWZ7	Phospho-2-dehydro-3-deoxyheptonate aldolase (EC 2.5.1.54)	ASJ32_13325	OTHER	Cytoplasmic	E	Stereospecific condensation of phosphoenolpyruvate (PEP) and D-erythrose-4-phosphate (E4P) giving rise to 3-deoxy-D- arabino-heptulosonate-7-phosphate (DAHP)	19.8154	NaN	20.4082	20.0288	28.2896	28.1288	28.6447	28.1859	19.8154	21.311	20.4082	20.0288	28.2896	28.1288	28.6447	28.1859				+	Ctrl_IM_Fe_IM	6.31253	0.000308717	-7.92142	-22.6339	28	27	26	70.4	70.4	68.5	40.105	0	323.31	4312100000	660	A0A6N4CWZ7	A0A6N4CWZ7	1853
A0A6N4CZ10	Non ribosomal peptide synthetase BasB	ASJ32_09665 GO994_22180	OTHER	CytoplasmicMembrane	Q	Evidence 3 Function proposed based on presence of conserved amino acid motif, structural feature or limited homology	22.593	23.9968	22.2473	23.5384	31.0501	30.941	31.6591	31.5349	22.593	23.9968	22.2473	23.5384	31.0501	30.941	31.6591	31.5349				+	Ctrl_IM_Fe_IM	5.79524	0.00076192	-8.20241	-18.5122	51	51	51	72.6	72.6	72.6	81.319	0	323.31	32415000000	1833	A0A6N4CZ10	A0A6N4CZ10	2257
A5I8G3	Hemin import ATP-binding protein HmuV (EC 7.6.2.-)	hutD hmuV ASJ32_00425 GO994_17255	OTHER	CytoplasmicMembrane	P	Part of the ABC transporter complex HmuTUV involved in hemin import. Responsible for energy coupling to the transport system	NaN	NaN	NaN	NaN	24.873	24.9943	25.0118	25.1888	20.8976	21.7379	21.0136	21.7416	24.873	24.9943	25.0118	25.1888				+	Ctrl_IM_Fe_IM	5.34087	0.00145316	-3.66929	-15.5003	16	16	16	70.6	70.6	70.6	28.709	0	215.01	338870000	112	A5I8G3	A5I8G3	2745
A0A0K0MDT1	Non-ribosomal peptide synthetase (Peptide synthetase)	amoF ASJ32_11185	OTHER	CytoplasmicMembrane	Q	COG1020 Non-ribosomal peptide synthetase modules and related proteins	24.8248	23.472	24.8759	23.9654	29.5312	29.8256	29.9251	29.4868	24.8248	23.472	24.8759	23.9654	29.5312	29.8256	29.9251	29.4868				+	Ctrl_IM_Fe_IM	5.27016	0.00145316	-5.40764	-15.0762	88	88	88	66	66	66	111.43	0	323.31	28878000000	3277	A0A0K0MDT1	A0A0K0MDT1	2
A0A6N4CW88	Putative histamine N-monooxygenase (Rhizobactin siderophore biosynthesis protein RhbE)	basC ASJ32_09660 GO994_22185	OTHER	Cytoplasmic	Q	l-lysine 6-monooxygenase	22.8589	24.0935	23.0334	23.3819	27.8695	28.1825	27.8436	28.6083	22.8589	24.0935	23.0334	23.3819	27.8695	28.1825	27.8436	28.6083				+	Ctrl_IM_Fe_IM	5.20048	0.00145316	-4.78403	-14.6691	40	40	40	62.7	62.7	62.7	49.683	0	323.31	10586000000	1935	A0A6N4CW88	A0A6N4CW88	1698
A0A6N4CRE6	Ligand-gated channel protein (TonB-dependent siderophore receptor)	ASJ32_06815 GO994_12210	SP(Sec/SPI)	OuterMembrane	P	Receptor	NaN	NaN	NaN	NaN	26.0985	26.2592	26.0394	26.0526	22.1186	20.5889	20.8343	21.0569	26.0985	26.2592	26.0394	26.0526				+	Ctrl_IM_Fe_IM	5.1834	0.00145316	-4.96272	-14.5709	61	61	61	78.1	78.1	78.1	78.762	0	323.31	2558000000	1277	A0A6N4CRE6	A0A6N4CRE6	634
A0A6N4CYL8	Non-ribosomal peptide synthetase	ASJ32_11175	OTHER	CytoplasmicMembrane	Q	COG1020 Non-ribosomal peptide synthetase modules and related proteins	22.2351	NaN	22.2104	22.4738	27.8858	27.5563	27.8013	26.9516	22.2351	21.0423	22.2104	22.4738	27.8858	27.5563	27.8013	26.9516				+	Ctrl_IM_Fe_IM	5.16265	0.00145316	-5.55833	-14.4525	103	103	103	55.7	55.7	55.7	228.57	0	323.31	4605100000	1086	A0A6N4CYL8	A0A6N4CYL8	2182
A0A6N4CZY7	Peptidase M13	ASJ32_01430	LIPO(Sec/SPII)	Unknown	O	peptidase, M13	27.0081	26.7646	26.7106	27.0978	28.075	28.1883	28.2076	28.1132	27.0081	26.7646	26.7106	27.0978	28.075	28.1883	28.2076	28.1132				+	Ctrl_IM_Fe_IM	4.83271	0.00279576	-1.25077	-12.6876	75	75	75	73.8	73.8	73.8	75.317	0	323.31	11470000000	3781	A0A6N4CZY7	A0A6N4CZY7	2430
Q6RBX6	Ligand-gated channel protein (Putative heme receptor) (Putative outer-membrane heme receptor)	hupA hutA ASJ32_00465	SP(Sec/SPI)	OuterMembrane	P	TonB dependent receptor	23.5465	23.652	25.5086	23.6189	30.2019	30.3293	30.0274	29.9097	23.5465	23.652	25.5086	23.6189	30.2019	30.3293	30.0274	29.9097				+	Ctrl_IM_Fe_IM	4.78303	0.00282003	-6.03559	-12.4401	108	108	108	93.3	93.3	93.3	76.971	0	323.31	72402000000	12985	Q6RBX6	Q6RBX6	2837
A0A6N4CXV2	Isochorismate synthase (EC 5.4.4.2)	ASJ32_11200	OTHER	Cytoplasmic	HQ	chorismate binding enzyme	23.1788	24.2756	23.1331	23.5157	28.1155	29.1757	29.7608	29.7194	23.1788	24.2756	23.1331	23.5157	28.1155	29.1757	29.7608	29.7194				+	Ctrl_IM_Fe_IM	4.72982	0.00282003	-5.66703	-12.1801	35	35	35	66.6	66.6	66.6	41.813	0	323.31	13174000000	1460	A0A6N4CXV2	A0A6N4CXV2	2028
A0A0K0MDT9	Peptide synthetase	amoH ASJ32_11170	OTHER	Cytoplasmic	Q	COG1020 Non-ribosomal peptide synthetase modules and related proteins	20.0422	21.9551	NaN	22.1405	26.9495	27.2465	27.4141	27.3267	20.0422	21.9551	21.1462	22.1405	26.9495	27.2465	27.4141	27.3267				+	Ctrl_IM_Fe_IM	4.71501	0.00282003	-5.91318	-12.1086	37	37	37	55.4	55.4	55.4	58.065	0	323.31	1989700000	473	A0A0K0MDT9	A0A0K0MDT9	3
A0A6N4CTR0	Uncharacterized protein	ASJ32_05380 GO994_19470	OTHER	Unknown	-	-	NaN	NaN	NaN	NaN	25.5752	25.4185	25.8123	25.6192	21.0215	21.1891	22.2022	20.4445	25.5752	25.4185	25.8123	25.6192				+	Ctrl_IM_Fe_IM	4.63299	0.00316294	-4.39194	-11.7198	10	10	10	47.5	47.5	47.5	15.864	0	133.12	267360000	59	A0A6N4CTR0	A0A6N4CTR0	1147
Q6SLH5	Ferric siderophore receptor (Ferric siderophore receptor B) (Ligand-gated channel protein)	fstB fstA ASJ32_09705	SP(Sec/SPI)	OuterMembrane	P	TonB dependent receptor	17.6534	18.9229	NaN	22.2882	30.8144	30.849	31.0876	31.333	17.6534	18.9229	20.1126	22.2882	30.8144	30.849	31.0876	31.333				+	Ctrl_IM_Fe_IM	4.5545	0.00348212	-11.2767	-11.3586	106	106	106	92	92	92	88.281	0	323.31	174680000000	24060	Q6SLH5	Q6SLH5	2839
A0A6N4CWY0	2,3-dihydroxybenzoate-AMP ligase (EC 2.7.7.58)	entE ASJ32_11195	OTHER	Cytoplasmic	Q	AMP-binding enzyme C-terminal domain	22.2069	22.652	20.524	20.5045	27.8636	28.2732	27.7052	27.8709	22.2069	22.652	20.524	20.5045	27.8636	28.2732	27.7052	27.8709				+	Ctrl_IM_Fe_IM	4.53325	0.00348212	-6.45638	-11.2626	49	49	49	73.7	73.7	73.7	59.936	0	323.31	12261000000	1636	A0A6N4CWY0	A0A6N4CWY0	1843
A0A6N4CYP8	Peptide synthetase	ASJ32_09655	OTHER	Cytoplasmic	Q	Condensation domain	21.3171	17.8519	20.9462	20.701	28.8127	28.8796	29.2815	28.6628	21.3171	17.8519	20.9462	20.701	28.8127	28.8796	29.2815	28.6628				+	Ctrl_IM_Fe_IM	4.43124	0.00414499	-8.70508	-10.812	122	122	122	73.7	73.7	73.7	160.57	0	323.31	26196000000	3390	A0A6N4CYP8	A0A6N4CYP8	2201
A5I8G0	RNA polymerase sigma-70 factor (RNA polymerase subunit sigma) (Sigma-70 family RNA polymerase sigma factor)	rpoE ASJ32_09670 GO994_22175	OTHER	Cytoplasmic	K	Belongs to the sigma-70 factor family. ECF subfamily	NaN	NaN	NaN	NaN	25.9577	24.4666	25.3243	25.5191	20.4468	19.8387	21.4597	20.4095	25.9577	24.4666	25.3243	25.5191				+	Ctrl_IM_Fe_IM	4.33212	0.00491828	-4.77827	-10.3901	11	11	11	51.7	51.7	51.7	19.838	0	158.72	290440000	60	A5I8G0	A5I8G0	2743
A0A6N4CXW4	Iron ABC transporter ATP-binding protein	ASJ32_09695	OTHER	CytoplasmicMembrane	P	ATPases associated with a variety of cellular activities	NaN	NaN	NaN	NaN	26.5287	26.9303	26.3656	25.9816	19.8964	22.333	20.9023	20.7562	26.5287	26.9303	26.3656	25.9816				+	Ctrl_IM_Fe_IM	4.26465	0.00544264	-5.47958	-10.1115	22	22	22	64.2	64.2	64.2	28.685	0	242.79	449640000	133	A0A6N4CXW4	A0A6N4CXW4	2035
A0A6N4CZU3	Uncharacterized protein	ASJ32_02400	LIPO(Sec/SPII)	Unknown	N	Protein of unknown function (DUF1566)	NaN	NaN	18.0492	NaN	27.6457	28.1031	28.0466	28.3181	20.9727	21.6117	18.0492	20.7567	27.6457	28.1031	28.0466	28.3181				+	Ctrl_IM_Fe_IM	4.13734	0.00630162	-7.68079	-9.60409	19	19	19	54.8	54.8	54.8	49.417	0	323.31	1906500000	458	A0A6N4CZU3	A0A6N4CZU3	2403
A5I8G9	ABC transporter substrate-binding protein (Hemin ABC transporter periplasmic HutB) (Hemin receptor)	hutB ASJ32_00435 GO994_17245	SP(Sec/SPI)	Periplasmic	P	ABC-type hemin transport system, periplasmic component	NaN	NaN	NaN	NaN	23.9516	24.6354	25.0234	24.7928	21.1095	21.521	22.0555	20.9133	23.9516	24.6354	25.0234	24.7928				+	Ctrl_IM_Fe_IM	4.07372	0.00697853	-3.20095	-9.35919	17	17	17	62	62	62	29.043	0	323.31	1623000000	406	A5I8G9	A5I8G9	2750
A0A6N4CPH4	DUF2753 family protein	ASJ32_15810 GO994_18715	OTHER	Unknown	S	Protein of unknown function (DUF2753)	NaN	NaN	NaN	NaN	24.2004	23.9965	25.003	23.4901	20.8981	20.5879	21.3528	20.8765	24.2004	23.9965	25.003	23.4901				+	Ctrl_IM_Fe_IM	4.03549	0.00730306	-3.24363	-9.21472	7	7	7	45.1	45.1	45.1	16.021	0	90.219	117140000	53	A0A6N4CPH4	A0A6N4CPH4	280
A0A6N4CWX9	Malate dehydrogenase	ASJ32_13910	OTHER	Cytoplasmic	C	Malic enzyme, NAD binding domain	NaN	NaN	NaN	NaN	22.5202	23.427	23.2323	23.1876	20.2729	21.1423	20.8069	20.5535	22.5202	23.427	23.2323	23.1876				+	Ctrl_IM_Fe_IM	3.93961	0.00857665	-2.39789	-8.86099	20	20	20	54.8	54.8	54.8	44.602	0	296.1	2090200000	242	A0A6N4CWX9	A0A6N4CWX9	1842
A0A6N4CQY9	Vibriobactin utilization protein ViuB	ASJ32_13330	OTHER	Cytoplasmic	P	Siderophore-interacting protein	21.2842	NaN	22.5773	20.9695	26.7425	26.7163	25.9982	25.5167	21.2842	20.3082	22.5773	20.9695	26.7425	26.7163	25.9982	25.5167				+	Ctrl_IM_Fe_IM	3.93092	0.00857665	-4.95863	-8.8295	14	14	14	52.2	52.2	52.2	30.135	0	166.94	1806700000	342	A0A6N4CQY9	A0A6N4CQY9	546
A5I8G4	Hypothetical iron regulator protein (Iron-regulated protein)	phuW ASJ32_00460 GO994_17220	LIPO(Sec/SPII)	Unknown	S	Haem-binding uptake, Tiki superfamily, ChaN	24.6484	24.7652	25.0879	25.7584	27.5743	27.6175	27.7558	28.5376	24.6484	24.7652	25.0879	25.7584	27.5743	27.6175	27.7558	28.5376				+	Ctrl_IM_Fe_IM	3.79578	0.0109856	-2.80632	-8.35259	30	30	30	66.1	66.1	66.1	35.766	0	323.31	3494700000	1073	A5I8G4	A5I8G4	2746
A5I8G8	Heme utilization protein HutX (HuvX protein)	hutX ASJ32_00440	OTHER	Cytoplasmic	P	Haem utilisation ChuX/HutX	NaN	NaN	NaN	NaN	24.8147	27.4879	27.9584	27.1957	20.7814	21.2929	20.907	20.9087	24.8147	27.4879	27.9584	27.1957				+	Ctrl_IM_Fe_IM	3.78099	0.0109856	-5.89169	-8.30179	18	18	18	93.5	93.5	93.5	19.096	0	175.61	3930800000	415	A5I8G8	A5I8G8	2749
A0A6P1HDL3	2,3-dihydro-2,3-dihydroxybenzoate dehydrogenase (EC 1.3.1.28)	dhbA ASJ32_11180 GO994_14100	OTHER	Cytoplasmic	IQ	involved in the biosynthesis of siderophores, enterobactin, bacillibactin or vibriobactin	21.7389	22.7672	21.9065	21.2134	25.0894	26.4128	26.7381	26.9808	21.7389	22.7672	21.9065	21.2134	25.0894	26.4128	26.7381	26.9808				+	Ctrl_IM_Fe_IM	3.77599	0.0109856	-4.39878	-8.28467	24	24	24	100	100	100	25.893	0	323.31	6095700000	888	A0A6P1HDL3	A0A6P1HDL3	2726
A0A6N4CN90	Energy transducer TonB	ASJ32_22005	SP(Sec/SPI)	CytoplasmicMembrane	U	MotA TolQ ExbB proton channel	27.0359	27.1071	27.2365	27.7115	29.0443	28.8348	28.5297	29.01	27.0359	27.1071	27.2365	27.7115	29.0443	28.8348	28.5297	29.01				+	Ctrl_IM_Fe_IM	3.75963	0.0110271	-1.58193	-8.22887	43	43	43	54.8	54.8	54.8	45.975	0	323.31	7801400000	1433	A0A6N4CN90	A0A6N4CN90	157
A5I8G7	Heme utilization protein HutZ	hutZ ASJ32_00445	OTHER	Cytoplasmic	P	Pfam:Pyridox_oxidase	19.6521	21.4262	18.7971	18.4139	25.4035	27.8725	28.5887	27.9803	19.6521	21.4262	18.7971	18.4139	25.4035	27.8725	28.5887	27.9803				+	Ctrl_IM_Fe_IM	3.72705	0.0113553	-7.88894	-8.11871	32	32	32	96.2	96.2	96.2	20.843	0	323.31	9174300000	1036	A5I8G7	A5I8G7	2748
A0A6N4CPZ7	Biopolymer transporter ExbD	ASJ32_21995 GO994_21985	OTHER	CytoplasmicMembrane	U	biopolymer transport protein	23.6548	24.3277	23.6093	24.7813	26.7871	27.3112	26.8526	26.393	23.6548	24.3277	23.6093	24.7813	26.7871	27.3112	26.8526	26.393				+	Ctrl_IM_Fe_IM	3.71819	0.0113553	-2.74268	-8.08898	11	11	11	55.6	55.6	55.6	14.721	0	296.4	936210000	274	A0A6N4CPZ7	A0A6N4CPZ7	362
A0A6N4CSS3	Gamma-glutamyltransferase	ASJ32_19165	LIPO(Sec/SPII)	Periplasmic	M	Gamma-glutamyltranspeptidase	25.3039	25.1143	24.7905	25.5969	26.502	26.6206	26.8701	26.7231	25.3039	25.1143	24.7905	25.5969	26.502	26.6206	26.8701	26.7231				+	Ctrl_IM_Fe_IM	3.6706	0.0113553	-1.47755	-7.93084	36	36	36	61.6	61.6	61.6	61.964	0	323.31	3020000000	1664	A0A6N4CSS3	A0A6N4CSS3	909
A0A6N4CWC2	Histidine decarboxylase (HDC) (EC 4.1.1.22)	hdc ASJ32_09645	OTHER	Cytoplasmic	E	decarboxylase	22.0948	NaN	22.7368	NaN	28.0355	27.6279	27.4579	26.288	22.0948	20.3695	22.7368	19.9756	28.0355	27.6279	27.4579	26.288				+	Ctrl_IM_Fe_IM	3.67051	0.0113553	-6.05815	-7.93054	25	25	25	54.5	54.5	54.5	43.652	0	323.31	1831700000	458	A0A6N4CWC2	A0A6N4CWC2	1718
A0A6P1HDX3	ATP-dependent RNA helicase SrmB (EC 3.6.4.13)	srmB ASJ32_15745 GO994_18650	OTHER	Cytoplasmic	L	DEAD-box RNA helicase involved in the assembly of the 50S ribosomal subunit at low temperature. Exhibits RNA-stimulated ATP hydrolysis and RNA unwinding activity	25.5277	24.6983	24.9919	25.7377	27.4819	26.9917	27.4002	27.3623	25.5277	24.6983	24.9919	25.7377	27.4819	26.9917	27.4002	27.3623				+	Ctrl_IM_Fe_IM	3.6566	0.0113553	-2.07013	-7.8848	28	28	28	65.1	65.1	65.1	45.562	0	323.31	3518600000	939	A0A6P1HDX3	A0A6P1HDX3	2729
Q7WYM8	Superoxide dismutase (EC 1.15.1.1)	sodA ASJ32_05385 GO994_19475	OTHER	Unknown	C	Destroys radicals which are normally produced within the cells and which are toxic to biological systems	NaN	NaN	NaN	NaN	27.8812	26.6132	27.045	25.2391	20.2142	20.3605	20.5577	22.3404	27.8812	26.6132	27.045	25.2391				+	Ctrl_IM_Fe_IM	3.64697	0.0113553	-5.82643	-7.85329	17	17	17	96.1	96.1	96.1	22.906	0	323.31	3001300000	224	Q7WYM8	Q7WYM8	2840
A0A6N4CUB4	Zinc-type alcohol dehydrogenase-like protein	ASJ32_04525 GO994_05015	OTHER	Cytoplasmic	C	Belongs to the zinc-containing alcohol dehydrogenase family. Quinone oxidoreductase subfamily	NaN	NaN	21.3564	NaN	24.2013	25.0211	25.9143	23.9704	21.2739	21.0256	21.3564	21.3752	24.2013	25.0211	25.9143	23.9704				+	Ctrl_IM_Fe_IM	3.64534	0.0113553	-3.51899	-7.84797	15	15	15	57.7	57.7	57.7	36.547	0	210.72	313280000	119	A0A6N4CUB4	A0A6N4CUB4	1272
A0A6N4CZH3	ABC transporter ATP-binding protein (ATP-binding cassette domain-containing protein)	ASJ32_09675 GO994_22170	OTHER	CytoplasmicMembrane	V	ABC transporter transmembrane region	19.5789	21.2318	16.9401	22.4625	29.3623	29.1283	29.4877	29.7443	19.5789	21.2318	16.9401	22.4625	29.3623	29.1283	29.4877	29.7443				+	Ctrl_IM_Fe_IM	3.63313	0.0113553	-9.37734	-7.80817	39	39	39	54.5	54.5	54.5	64.887	0	323.31	7300800000	1053	A0A6N4CZH3	A0A6N4CZH3	2344
A0A6N4CS41	Isochorismatase (EC 3.3.2.1)	ASJ32_11190 GO994_14110	OTHER	Cytoplasmic	Q	Isochorismatase	22.0921	22.5514	24.4916	22.3992	27.4204	29.9094	29.4391	28.7089	22.0921	22.5514	24.4916	22.3992	27.4204	29.9094	29.4391	28.7089				+	Ctrl_IM_Fe_IM	3.62694	0.0113553	-5.98587	-7.78808	33	33	33	79.8	79.8	79.8	33.93	0	323.31	14001000000	1024	A0A6N4CS41	A0A6N4CS41	768
A0A6N4CP55	NAD(P)-bd_dom domain-containing protein	ASJ32_20755	OTHER	Unknown	GM	NAD(P)H-binding	24.07	24.547	23.5207	24.2211	26.7085	26.4676	27.2971	26.1096	24.07	24.547	23.5207	24.2211	26.7085	26.4676	27.2971	26.1096				+	Ctrl_IM_Fe_IM	3.62195	0.0113553	-2.55599	-7.77189	18	18	18	76.3	76.3	76.3	22.632	0	323.31	2034200000	784	A0A6N4CP55	A0A6N4CP55	232
A0A6N4CUS7	Phosphohistidine phosphatase	ASJ32_12915	OTHER	Cytoplasmic	S	granule-associated protein	22.7375	22.4448	20.8921	20.6824	25.5348	25.9057	26.2517	25.7857	22.7375	22.4448	20.8921	20.6824	25.5348	25.9057	26.2517	25.7857				+	Ctrl_IM_Fe_IM	3.58334	0.01182	-4.18027	-7.64768	29	29	29	91.1	91.1	91.1	20.503	0	323.31	3733900000	817	A0A6N4CUS7	A0A6N4CUS7	1383
A0A6N4CVT7	Dihydroxy-acid dehydratase (DAD) (EC 4.2.1.9)	ilvD ASJ32_13865 GO994_21300	OTHER	Cytoplasmic	E	Belongs to the IlvD Edd family	27.8842	27.6577	27.8325	27.7337	28.2712	28.3636	28.285	28.53	27.8842	27.6577	27.8325	27.7337	28.2712	28.3636	28.285	28.53				+	Ctrl_IM_Fe_IM	3.53714	0.0125492	-0.585417	-7.50121	65	65	65	77	77	77	65.115	0	323.31	23812000000	4691	A0A6N4CVT7	A0A6N4CVT7	1606
A0A6P1H5P8	Polyphosphate kinase (EC 2.7.4.1)	ppk2 ASJ32_02345 GO994_09810	OTHER	Cytoplasmic	S	Polyphosphate kinase 2 (PPK2)	21.4658	NaN	21.7367	22.0048	23.6957	25.566	24.8386	25.2198	21.4658	21.4204	21.7367	22.0048	23.6957	25.566	24.8386	25.2198				+	Ctrl_IM_Fe_IM	3.50815	0.0131175	-3.1731	-7.4105	18	18	18	70.5	70.5	70.5	31.784	0	30.264	313750000	146	A0A6P1H5P8	A0A6P1H5P8	2601
A0A6N4CSL9	4-hydroxy-tetrahydrodipicolinate reductase (HTPA reductase) (EC 1.17.1.8)	dapB ASJ32_19545 GO994_08040	OTHER	Cytoplasmic	E	Catalyzes the conversion of 4-hydroxy- tetrahydrodipicolinate (HTPA) to tetrahydrodipicolinate	25.3701	25.4129	25.4851	25.0232	26.3321	26.2814	26.7321	26.7966	25.3701	25.4129	25.4851	25.0232	26.3321	26.2814	26.7321	26.7966				+	Ctrl_IM_Fe_IM	3.44405	0.0147629	-1.21273	-7.21317	27	27	27	82.2	82.2	82.2	28.659	0	323.31	3447600000	1158	A0A6N4CSL9	A0A6N4CSL9	876
A0A6N4D0E4	DUF1566 domain-containing protein	ASJ32_02405 GO994_09745	SP(Sec/SPI)	Unknown	KLT	Protein of unknown function (DUF1566)	NaN	NaN	NaN	NaN	25.9018	25.7049	26.4432	26.6794	21.9704	22.6153	19.6831	21.1347	25.9018	25.7049	26.4432	26.6794				+	Ctrl_IM_Fe_IM	3.43335	0.0147629	-4.83144	-7.18065	16	16	16	67.6	67.6	67.6	20.462	0	323.31	964630000	416	A0A6N4D0E4	A0A6N4D0E4	2497
A0A6N4CYR0	50S ribosomal protein L27	rpmA ASJ32_00300 GO994_17380	OTHER	Cytoplasmic	J	Belongs to the bacterial ribosomal protein bL27 family	27.0198	25.3869	25.7904	26.3622	28.8455	28.4873	29.0364	28.9181	27.0198	25.3869	25.7904	26.3622	28.8455	28.4873	29.0364	28.9181				+	Ctrl_IM_Fe_IM	3.4288	0.0147629	-2.68198	-7.16687	12	12	12	81.2	81.2	81.2	9.0673	0	323.31	5783800000	1758	A0A6N4CYR0	A0A6N4CYR0	2206
A0A6N4CU14	Biopolymer transporter ExbB (MotA/TolQ/ExbB proton channel family protein)	ASJ32_04915 GO994_04575	OTHER	CytoplasmicMembrane	U	COG0811 Biopolymer transport proteins	22.2067	NaN	NaN	NaN	24.4448	23.7384	24.2452	24.8621	22.2067	22.2012	21.0411	21.5681	24.4448	23.7384	24.2452	24.8621				+	Ctrl_IM_Fe_IM	3.38381	0.0154108	-2.56837	-7.0317	5	5	5	22.9	22.9	22.9	19.487	0.00041929	18.872	89761000	31	A0A6N4CU14	A0A6N4CU14	1207
A0A6N4CXM1	Iron-siderophore ABC transporter ATP-binding protein	ASJ32_11155	OTHER	CytoplasmicMembrane	P	ATPases associated with a variety of cellular activities	24.6382	24.4102	25.1071	24.929	26.4669	26.4236	25.8668	26.1038	24.6382	24.4102	25.1071	24.929	26.4669	26.4236	25.8668	26.1038				+	Ctrl_IM_Fe_IM	3.33774	0.016806	-1.44417	-6.89541	19	19	19	64.6	64.6	64.6	29.762	0	323.31	1118200000	392	A0A6N4CXM1	A0A6N4CXM1	1978
A0A6N4CZH0	N-acetylmuramoyl-L-alanine amidase (EC 3.5.1.28)	ASJ32_00250	SP(Sec/SPI)	Unknown	M	Ami_3	24.3612	23.6805	24.2561	24.0923	25.1737	25.1946	25.0579	25.3704	24.3612	23.6805	24.2561	24.0923	25.1737	25.1946	25.0579	25.3704				+	Ctrl_IM_Fe_IM	3.29159	0.0179939	-1.1016	-6.76104	53	53	53	79.5	79.5	79.5	55.956	0	323.31	1647300000	1051	A0A6N4CZH0	A0A6N4CZH0	2342
A0A6N4CQD1	Uncharacterized protein	ASJ32_22010	SP(Sec/SPI)	Unknown	D	Protein of unknown function (DUF3450)	23.1397	NaN	23.0797	22.3432	25.4036	24.8731	24.4712	24.7819	23.1397	22.0679	23.0797	22.3432	25.4036	24.8731	24.4712	24.7819				+	Ctrl_IM_Fe_IM	3.28372	0.0179939	-2.22481	-6.73833	31	31	31	72.3	72.3	72.3	28.235	0	323.31	885560000	581	A0A6N4CQD1	A0A6N4CQD1	433
A0A6N4CVN2	ATP-binding cassette domain-containing protein (Iron ABC transporter ATP-binding protein)	ASJ32_14795 GO994_10965	OTHER	CytoplasmicMembrane	HP	ATPases associated with a variety of cellular activities	23.9262	23.4371	23.6881	23.3586	24.5548	24.6244	24.5907	24.3566	23.9262	23.4371	23.6881	23.3586	24.5548	24.6244	24.5907	24.3566				+	Ctrl_IM_Fe_IM	3.21398	0.0203871	-0.929121	-6.53976	6	6	6	28.2	28.2	28.2	28.338	0	60.821	195180000	102	A0A6N4CVN2	A0A6N4CVN2	1566
A0A6N4CUR3	Short-chain dehydrogenase	ASJ32_15830	OTHER	Unknown	S	short-chain dehydrogenase	20.1547	NaN	21.6296	21.4186	23.2591	23.5329	23.2949	22.9267	20.1547	20.8325	21.6296	21.4186	23.2591	23.5329	23.2949	22.9267				+	Ctrl_IM_Fe_IM	3.14484	0.0232171	-2.24453	-6.34749	16	16	16	68.4	68.4	68.4	24.218	0	225.37	407270000	277	A0A6N4CUR3	A0A6N4CUR3	1374
A0A6N4CS64	Glutathione synthase (RimK family alpha-L-glutamate ligase)	ASJ32_05300 GO994_19385	OTHER	Cytoplasmic	HJ	RimK-like ATPgrasp N-terminal domain	21.9086	21.2865	21.4472	21.2884	23.1111	23.0287	22.8908	22.3987	21.9086	21.2865	21.4472	21.2884	23.1111	23.0287	22.8908	22.3987				+	Ctrl_IM_Fe_IM	3.14202	0.0232171	-1.37464	-6.33972	20	20	20	47.9	47.9	47.9	53.92	0	267.71	131080000	106	A0A6N4CS64	A0A6N4CS64	783
A0A6N4D008	Heat-shock protein IbpA	ASJ32_09565	OTHER	Cytoplasmic	O	Belongs to the small heat shock protein (HSP20) family	21.8939	NaN	NaN	23.104	25.0959	27.3518	27.9718	26.4955	21.8939	22.1515	21.2447	23.104	25.0959	27.3518	27.9718	26.4955				+	Ctrl_IM_Fe_IM	3.13525	0.0232171	-4.63026	-6.32116	18	18	18	80.7	80.7	80.7	16.399	0	235.92	676440000	136	A0A6N4D008	A0A6N4D008	2440
A0A6N4CWZ1	H(+)-transporting two-sector ATPase (EC 7.1.2.2)	fliI ASJ32_14220	OTHER	Cytoplasmic	NU	COG1157 Flagellar biosynthesis type III secretory pathway ATPase	NaN	NaN	NaN	NaN	22.2215	22.162	22.8994	22.1742	20.947	20.9957	21.0135	21.3802	22.2215	22.162	22.8994	22.1742				+	Ctrl_IM_Fe_IM	3.11016	0.0241945	-1.28018	-6.25271	16	16	15	50.1	50.1	49.4	47.7	0	74.708	64507000	44	A0A6N4CWZ1	A0A6N4CWZ1	1849
A5I8G1	Ligand-gated channel protein (Putative hemin receptor) (TonB-dependent hemoglobin/transferrin/lactoferrin family receptor)	hupA ASJ32_02385 GO994_09765	SP(Sec/SPI)	OuterMembrane	P	receptor	NaN	NaN	16.7797	17.6957	27.0511	26.2391	26.689	27.1003	20.9349	21.7027	16.7797	17.6957	27.0511	26.2391	26.689	27.1003				+	Ctrl_IM_Fe_IM	3.06961	0.0261344	-7.49163	-6.14326	66	66	65	77	77	77	80.389	0	323.31	3228500000	1147	A5I8G1	A5I8G1	2744
A0A6N4CP35	Anthranilate phosphoribosyltransferase (EC 2.4.2.18)	trpD ASJ32_21000	OTHER	Cytoplasmic	F		24.4301	24.2487	24.388	24.3268	26.3996	26.1717	26.3863	25.2364	24.4301	24.2487	24.388	24.3268	26.3996	26.1717	26.3863	25.2364				+	Ctrl_IM_Fe_IM	3.05507	0.0265949	-1.70012	-6.10439	22	21	21	72.1	72.1	72.1	35.341	0	323.31	1175800000	365	A0A6N4CP35	A0A6N4CP35	223
A4Q8K7	Uncharacterized protein	ASJ32_22630 GO994_22700	OTHER	Cytoplasmic	/	/	NaN	NaN	NaN	21.4093	22.6638	22.8281	24.1384	23.3444	20.2847	20.3178	20.6914	21.4093	22.6638	22.8281	24.1384	23.3444				+	Ctrl_IM_Fe_IM	3.04659	0.0266954	-2.56786	-6.08181	18	18	18	89.6	89.6	89.6	13.407	0	60.094	281800000	136	A4Q8K7	A4Q8K7	2742
A0A6N4CQL4	GCN5 family acetyltransferase	ASJ32_06185	OTHER	Cytoplasmic	J	COG1670 Acetyltransferases, including N-acetylases of ribosomal proteins	24.6482	24.233	24.068	24.5311	25.4308	25.1789	25.7894	25.6595	24.6482	24.233	24.068	24.5311	25.4308	25.1789	25.7894	25.6595				+	Ctrl_IM_Fe_IM	3.03424	0.0270431	-1.14455	-6.04901	14	14	14	71.1	71.1	71.1	18.868	0	208.43	417000000	220	A0A6N4CQL4	A0A6N4CQL4	470
A0A6N4CR63	UPF0229 protein ASJ32_07020	ASJ32_07020	OTHER	Cytoplasmic	S	Belongs to the UPF0229 family	20.1162	NaN	20.9549	NaN	23.9556	22.8723	23.4721	23.6359	20.1162	21.5742	20.9549	21.5106	23.9556	22.8723	23.4721	23.6359				+	Ctrl_IM_Fe_IM	3.0187	0.0276036	-2.445	-6.00795	16	16	16	46.3	46.3	46.3	48.701	0	138.34	132760000	85	A0A6N4CR63	A0A6N4CR63	585
A0A6N4D037	Beta-N-acetylhexosaminidase (EC 3.2.1.52) (N-acetyl-beta-glucosaminidase)	ASJ32_03035	SP(Sec/SPI)	Unknown	G	COG3525 N-acetyl-beta-hexosaminidase	23.6787	23.7752	24.099	23.6617	24.9304	25.4858	26.1069	25.1982	23.6787	23.7752	24.099	23.6617	24.9304	25.4858	26.1069	25.1982				+	Ctrl_IM_Fe_IM	3.00742	0.0279073	-1.62666	-5.97827	74	74	74	75.9	75.9	75.9	96.941	0	323.31	1605500000	910	A0A6N4D037	A0A6N4D037	2452
A0A6N4CUF7	Enolase (EC 4.2.1.11) (2-phospho-D-glycerate hydro-lyase) (2-phosphoglycerate dehydratase)	eno ASJ32_17740 GO994_03945	OTHER	Cytoplasmic	F	Catalyzes the reversible conversion of 2- phosphoglycerate into phosphoenolpyruvate. It is essential for the degradation of carbohydrates via glycolysis	27.8157	27.4578	27.7589	27.3385	28.7715	29.0559	28.8526	29.7947	27.8157	27.4578	27.7589	27.3385	28.7715	29.0559	28.8526	29.7947				+	Ctrl_IM_Fe_IM	2.96382	0.0304005	-1.52594	-5.86461	74	74	74	88	88	88	45.736	0	323.31	96301000000	18634	A0A6N4CUF7	A0A6N4CUF7	1297
A0A6N4CSV8	Isocitrate dehydrogenase kinase/phosphatase (IDH kinase/phosphatase) (IDHK/P) (EC 2.7.11.5) (EC 3.1.3.-)	aceK ASJ32_19310	OTHER	Cytoplasmic	F	Bifunctional enzyme which can phosphorylate or dephosphorylate isocitrate dehydrogenase (IDH) on a specific serine residue. This is a regulatory mechanism which enables bacteria to bypass the Krebs cycle via the glyoxylate shunt in response to the source of carbon. When bacteria are grown on glucose, IDH is fully active and unphosphorylated, but when grown on acetate or ethanol, the activity of I…	21.0301	NaN	21.5451	NaN	24.2768	24.4959	24.1947	23.2285	21.0301	22.4748	21.5451	21.532	24.2768	24.4959	24.1947	23.2285				+	Ctrl_IM_Fe_IM	2.95265	0.0307408	-2.40347	-5.83574	26	26	26	45	45	45	67.433	0	240.99	185460000	110	A0A6N4CSV8	A0A6N4CSV8	933
A0A6N4CWL8	L-threonine dehydratase (EC 4.3.1.19) (Threonine deaminase)	ilvA ASJ32_13870	OTHER	Cytoplasmic	E	Catalyzes the anaerobic formation of alpha-ketobutyrate and ammonia from threonine in a two-step reaction. The first step involved a dehydration of threonine and a production of enamine intermediates (aminocrotonate), which tautomerizes to its imine form (iminobutyrate). Both intermediates are unstable and short- lived. The second step is the nonenzymatic hydrolysis of the enamine imine intermedi…	24.4917	24.4984	24.937	24.4262	25.2191	25.3674	25.3189	25.5111	24.4917	24.4984	24.937	24.4262	25.2191	25.3674	25.3189	25.5111				+	Ctrl_IM_Fe_IM	2.93691	0.0311288	-0.765822	-5.79526	58	58	58	87.9	87.9	87.9	55.488	0	323.31	3349200000	1664	A0A6N4CWL8	A0A6N4CWL8	1771
A0A6N4CT88	DUF3369 domain-containing protein (Phosphodiesterase)	ASJ32_18660 GO994_17740	OTHER	Cytoplasmic	T	Domain of unknown function (DUF3369)	23.007	23.4209	22.709	22.7182	23.9157	24.883	24.6073	24.7322	23.007	23.4209	22.709	22.7182	23.9157	24.883	24.6073	24.7322				+	Ctrl_IM_Fe_IM	2.9329	0.0311288	-1.57076	-5.78498	24	24	24	60.1	60.1	60.1	58.416	0	323.31	635770000	348	A0A6N4CT88	A0A6N4CT88	1024
A0A6N4D075	Peptidase M3	ASJ32_01860	OTHER	Cytoplasmic	E	COG1164 Oligoendopeptidase F	24.7229	25.2461	24.6914	24.5345	25.7492	25.642	25.6677	25.7321	24.7229	25.2461	24.6914	24.5345	25.7492	25.642	25.6677	25.7321				+	Ctrl_IM_Fe_IM	2.91272	0.0314241	-0.899046	-5.73343	43	43	43	67.3	67.3	67.3	67.208	0	323.31	1917100000	948	A0A6N4D075	A0A6N4D075	2467
A0A6N4CXT2	Phosphoserine aminotransferase (EC 2.6.1.52) (Phosphohydroxythreonine aminotransferase) (PSAT)	serC ASJ32_11100 GO994_14015	OTHER	Cytoplasmic	E	Catalyzes the reversible conversion of 3- phosphohydroxypyruvate to phosphoserine and of 3-hydroxy-2-oxo-4- phosphonooxybutanoate to phosphohydroxythreonine	25.3556	24.8453	25.9204	24.9822	26.6562	26.8552	26.5689	26.6458	25.3556	24.8453	25.9204	24.9822	26.6562	26.8552	26.5689	26.6458				+	Ctrl_IM_Fe_IM	2.88677	0.0321582	-1.40569	-5.66765	48	48	48	85.6	85.6	85.6	39.535	0	323.31	11859000000	4063	A0A6N4CXT2	A0A6N4CXT2	2016
A0A6N4CQV6	Ligand-gated channel protein	ASJ32_06030	SP(Sec/SPI)	OuterMembrane	M	TonB dependent receptor	23.2726	22.1958	22.5009	23.1756	24.7686	24.6139	24.4116	24.0267	23.2726	22.1958	22.5009	23.1756	24.7686	24.6139	24.4116	24.0267				+	Ctrl_IM_Fe_IM	2.79767	0.0378836	-1.66895	-5.44596	76	76	76	82.5	82.5	82.5	75.351	0	323.31	3163400000	1751	A0A6N4CQV6	A0A6N4CQV6	529
A0A6N4CRB6	Anthranilate synthase component 1 (EC 4.1.3.27)	ASJ32_20990 GO994_15855	OTHER	Cytoplasmic	E	Anthranilate synthase component I, N terminal region	24.6864	24.4717	24.3373	24.6605	25.1067	25.7603	25.8953	25.4973	24.6864	24.4717	24.3373	24.6605	25.1067	25.7603	25.8953	25.4973				+	Ctrl_IM_Fe_IM	2.75264	0.0415038	-1.02592	-5.33629	43	43	43	70.8	70.8	70.8	59.814	0	323.31	2033300000	1112	A0A6N4CRB6	A0A6N4CRB6	615
A0A6N4CTU9	Triosephosphate isomerase (TIM) (TPI) (EC 5.3.1.1) (Triose-phosphate isomerase)	tpiA ASJ32_04290	OTHER	Cytoplasmic	G	Involved in the gluconeogenesis. Catalyzes stereospecifically the conversion of dihydroxyacetone phosphate (DHAP) to D-glyceraldehyde-3-phosphate (G3P)	24.2303	24.532	24.3224	24.41	24.7992	24.914	25.0213	25.2616	24.2303	24.532	24.3224	24.41	24.7992	24.914	25.0213	25.2616				+	Ctrl_IM_Fe_IM	2.74369	0.0417828	-0.625334	-5.31468	15	15	15	66.5	66.5	66.5	27.407	0	187.44	850030000	414	A0A6N4CTU9	A0A6N4CTU9	1170
A0A6N4CY70	Glucose-1-phosphate adenylyltransferase (EC 2.7.7.27) (ADP-glucose pyrophosphorylase) (ADPGlc PPase) (ADP-glucose synthase)	glgC ASJ32_11215	OTHER	Cytoplasmic	H	Catalyzes the synthesis of ADP-glucose, a sugar donor used in elongation reactions on alpha-glucans	22.7673	23.2149	23.646	22.913	24.5689	24.4398	24.2835	24.0331	22.7673	23.2149	23.646	22.913	24.5689	24.4398	24.2835	24.0331				+	Ctrl_IM_Fe_IM	2.73683	0.0417828	-1.19598	-5.29816	32	19	19	66.7	44.3	44.3	47.462	0	192.73	445310000	413	A0A6N4CY70	A0A6N4CY70	2093
A0A6N4CY75	Glutamine amidotransferase	ASJ32_10590 GO994_00810	OTHER	Cytoplasmic	F	glutamine amidotransferase	NaN	NaN	NaN	NaN	23.9537	25.6887	26.6239	25.5761	20.1237	22.8366	19.8954	20.7106	23.9537	25.6887	26.6239	25.5761				+	Ctrl_IM_Fe_IM	2.71692	0.0422354	-4.56903	-5.25041	7	7	7	44.6	44.6	44.6	27.729	0	63.909	429480000	94	A0A6N4CY75	A0A6N4CY75	2095
A0A151KEJ1	Uncharacterized protein	ASJ32_22425 UC37_22585	OTHER	Unknown	/	/	21.6982	NaN	NaN	21.6005	23.0001	24.5278	23.0082	24.2777	21.6982	21.5905	21.5016	21.6005	23.0001	24.5278	23.0082	24.2777				+	Ctrl_IM_Fe_IM	2.67433	0.0446386	-2.10577	-5.14927	10	10	10	75.2	75.2	75.2	11.236	0	60.722	561140000	201	A0A151KEJ1	A0A151KEJ1	10
A0A6N4CW86	Histidine biosynthesis bifunctional protein HisIE [Includes: Phosphoribosyl-AMP cyclohydrolase (PRA-CH) (EC 3.5.4.19); Phosphoribosyl-ATP pyrophosphatase (PRA-PH) (EC 3.6.1.31)]	hisI hisIE ASJ32_12530 GO994_11920	OTHER	Cytoplasmic	E	Belongs to the PRA-CH family	24.2155	25.0637	24.4236	24.5158	25.3046	25.7274	25.6601	25.6339	24.2155	25.0637	24.4236	24.5158	25.3046	25.7274	25.6601	25.6339				+	Ctrl_IM_Fe_IM	2.62414	0.0482777	-1.02686	-5.0318	15	15	15	57.8	57.8	57.8	23.046	0	323.31	1925200000	844	A0A6N4CW86	A0A6N4CW86	1697
A0A6N4CYK7	50S ribosomal protein L22	rplV ASJ32_10930 GO994_01170	OTHER	Cytoplasmic	J	The globular domain of the protein is located near the polypeptide exit tunnel on the outside of the subunit, while an extended beta-hairpin is found that lines the wall of the exit tunnel in the center of the 70S ribosome	29.5957	30.1261	29.7729	29.8429	30.5607	30.3757	30.8329	30.5038	29.5957	30.1261	29.7729	29.8429	30.5607	30.3757	30.8329	30.5038				+	Ctrl_IM_Fe_IM	2.6158	0.0482777	-0.733895	-5.01245	27	27	27	90.4	90.4	90.4	12.394	0	323.31	87017000000	9624	A0A6N4CYK7	A0A6N4CYK7	2177
A0A6N4CRK2	Multifunctional fusion protein [Includes: Indole-3-glycerol phosphate synthase (IGPS) (EC 4.1.1.48); N-(5'-phosphoribosyl)anthranilate isomerase (PRAI) (EC 5.3.1.24)]	trpF trpC ASJ32_21005	OTHER	Cytoplasmic	E	Belongs to the TrpC family	24.6856	24.9088	24.2061	24.1796	25.5596	25.7574	25.7787	25.2503	24.6856	24.9088	24.2061	24.1796	25.5596	25.7574	25.7787	25.2503				+	Ctrl_IM_Fe_IM	2.61319	0.0482777	-1.0915	-5.00642	40	40	40	76.7	76.7	76.7	53.416	0	323.31	1476700000	757	A0A6N4CRK2	A0A6N4CRK2	669
A0A6P1HC67	Acetolactate synthase (Acetolactate synthase 2 small subunit) (EC 2.2.1.6)	ilvM ASJ32_13855 GO994_21310	OTHER	Unknown	S	ACT domain	24.2612	23.8511	24.1227	23.8695	24.7317	24.471	24.9389	24.7214	24.2612	23.8511	24.1227	23.8695	24.7317	24.471	24.9389	24.7214				+	Ctrl_IM_Fe_IM	2.6036	0.0488475	-0.68963	-4.98424	3	3	3	17.7	17.7	17.7	11.099	0	30.754	180630000	62	A0A6P1HC67	A0A6P1HC67	2714
A0A6N4CU55	Adenine DNA glycosylase (EC 3.2.2.31)	mutY ASJ32_15980 GO994_19595	OTHER	Cytoplasmic	L	FES	24.3	24.6741	25.1174	24.0503	22.0286	20.4837	22.2597	22.7103	24.3	24.6741	25.1174	24.0503	22.0286	20.4837	22.2597	22.7103				+	Ctrl_IM_Fe_IM	2.59619	0.0491803	2.66487	4.96717	21	21	21	75.6	75.6	75.6	39.79	0	323.31	527250000	370	A0A6N4CU55	A0A6N4CU55	1231
A0A6N4CXL5	Cytochrome c oxidase accessory protein CcoG	ASJ32_13790	OTHER	CytoplasmicMembrane	C	Cytochrome c oxidase accessory protein CcoG	24.567	23.4083	24.3567	24.652	22.3725	NaN	NaN	22.0544	24.567	23.4083	24.3567	24.652	22.3725	21.0304	20.2676	22.0544				+	Ctrl_IM_Fe_IM	2.61956	0.0482777	2.81475	5.02118	23	23	23	40.2	40.2	40.2	54.955	0	282.54	449260000	224	A0A6N4CXL5	A0A6N4CXL5	1973
A0A6N4CQ85	Cytochrome C biogenesis protein CcmH	ASJ32_14385	OTHER	CytoplasmicMembrane	O	Cytochrome c-type biogenesis protein	26.3939	26.0859	26.3297	27.0989	25.4569	25.1463	25.3602	25.3594	26.3939	26.0859	26.3297	27.0989	25.4569	25.1463	25.3602	25.3594				+	Ctrl_IM_Fe_IM	2.62932	0.0482777	1.14639	5.04384	43	43	43	75.6	75.6	75.6	46.635	0	323.31	3345100000	1338	A0A6N4CQ85	A0A6N4CQ85	411
A0A6N4CWM2	Glycosyl transferase	ASJ32_13725	OTHER	Cytoplasmic	M	Glycosyl transferases group 1	25.6674	25.8454	25.1439	25.9447	24.81	24.4882	24.6499	24.7263	25.6674	25.8454	25.1439	25.9447	24.81	24.4882	24.6499	24.7263				+	Ctrl_IM_Fe_IM	2.67046	0.0446386	0.981694	5.14015	24	24	24	55.2	55.2	55.2	41.577	0	309.11	849230000	330	A0A6N4CWM2	A0A6N4CWM2	1774
A0A6N4CR79	Urocanate hydratase (Urocanase) (EC 4.2.1.49) (Imidazolonepropionate hydrolase)	hutU ASJ32_06370	OTHER	Cytoplasmic	H	Catalyzes the conversion of urocanate to 4-imidazolone- 5-propionate	25.6127	26.5682	26.2678	25.8053	24.0621	23.6232	23.6309	24.9645	25.6127	26.5682	26.2678	25.8053	24.0621	23.6232	23.6309	24.9645				+	Ctrl_IM_Fe_IM	2.69842	0.042796	1.99331	5.20631	50	50	50	73.4	73.4	73.4	61.954	0	323.31	6602500000	2633	A0A6N4CR79	A0A6N4CR79	592
A0A6P1H5F1	tRNA-2-methylthio-N(6)-dimethylallyladenosine synthase (EC 2.8.4.3) ((Dimethylallyl)adenosine tRNA methylthiotransferase MiaB) (tRNA-i(6)A37 methylthiotransferase)	miaB ASJ32_17065 GO994_05655	OTHER	Cytoplasmic	J	Catalyzes the methylthiolation of N6- (dimethylallyl)adenosine (i(6)A), leading to the formation of 2- methylthio-N6-(dimethylallyl)adenosine (ms(2)i(6)A) at position 37 in tRNAs that read codons beginning with uridine	27.3298	27.5518	27.3116	27.898	26.2426	26.114	26.7818	26.6186	27.3298	27.5518	27.3116	27.898	26.2426	26.114	26.7818	26.6186				+	Ctrl_IM_Fe_IM	2.70327	0.042796	1.08356	5.21785	40	40	40	90.1	90.1	90.1	53.41	0	323.31	2457300000	1076	A0A6P1H5F1	A0A6P1H5F1	2595
A0A6N4CRZ5	Uncharacterized protein	ASJ32_20015	OTHER	Cytoplasmic	C	FAD linked oxidases, C-terminal domain	26.0718	24.8204	25.2632	26.1351	24.1352	23.5377	23.396	23.0921	26.0718	24.8204	25.2632	26.1351	24.1352	23.5377	23.396	23.0921				+	Ctrl_IM_Fe_IM	2.71401	0.0422354	2.0324	5.24347	88	88	88	78.6	78.6	78.6	113.23	0	323.31	4292200000	2254	A0A6N4CRZ5	A0A6N4CRZ5	738
A0A6N4CQ26	Carbamoyl-phosphate synthase large chain (EC 6.3.5.5) (Carbamoyl-phosphate synthetase ammonia chain)	carB ASJ32_19535	LIPO(Sec/SPII)	Unknown	F	Carbamoyl-phosphate synthetase ammonia chain	29.7065	29.4261	29.7235	29.8723	29.2427	28.855	28.9976	29.0452	29.7065	29.4261	29.7235	29.8723	29.2427	28.855	28.9976	29.0452				+	Ctrl_IM_Fe_IM	2.72368	0.0422354	0.646983	5.2666	131	131	131	79.7	79.7	79.7	117.76	0	323.31	69500000000	13559	A0A6N4CQ26	A0A6N4CQ26	376
A0A6N4CNQ5	DUF1338 family protein (Succinyldiaminopimelate aminotransferase)	ASJ32_17380 GO994_05970	OTHER	Unknown	S	DUF1338	23.0851	NaN	23.6639	23.2626	NaN	NaN	NaN	NaN	23.0851	22.5186	23.6639	23.2626	21.9239	20.5641	20.7872	21.178				+	Ctrl_IM_Fe_IM	2.73393	0.0417828	2.01924	5.2912	18	18	18	71.7	71.7	71.7	29.579	0	319.77	387690000	302	A0A6N4CNQ5	A0A6N4CNQ5	192
A0A6N4CNP1	Oxidoreductase	ASJ32_08575	OTHER	Unknown	S	Phage major capsid protein, P2 family	26.3468	25.6348	26.3251	26.8541	24.8348	23.9927	24.4945	24.8454	26.3468	25.6348	26.3251	26.8541	24.8348	23.9927	24.4945	24.8454				+	Ctrl_IM_Fe_IM	2.80039	0.0378836	1.74836	5.45264	55	55	55	96.6	96.6	96.6	38.459	0	323.31	402090000000	24312	A0A6N4CNP1	A0A6N4CNP1	188
A0A6N4CP15	Methionine synthase (EC 2.1.1.13) (5-methyltetrahydrofolate--homocysteine methyltransferase)	ASJ32_06175	OTHER	Cytoplasmic	E	Methionine synthase	27.5609	26.5034	26.7073	27.6756	25.4678	23.9951	24.8915	24.6838	27.5609	26.5034	26.7073	27.6756	25.4678	23.9951	24.8915	24.6838				+	Ctrl_IM_Fe_IM	2.83618	0.0355582	2.35225	5.54099	97	97	97	75.6	75.6	75.6	134.88	0	323.31	4134400000	1643	A0A6N4CP15	A0A6N4CP15	217
A0A6N4CZD9	Periplasmic nitrate reductase (EC 1.9.6.1)	napA ASJ32_02760 GO994_09375	TAT(Tat/SPI)	Periplasmic	C	nitrate reductase (NAP). Only expressed at high levels during aerobic growth. NapAB complex receives electrons from the membrane-anchored tetraheme protein NapC	23.7729	21.8104	23.1737	23.0163	20.8906	20.3956	20.3413	20.106	23.7729	21.8104	23.1737	23.0163	20.8906	20.3956	20.3413	20.106				+	Ctrl_IM_Fe_IM	2.88543	0.0321582	2.50998	5.66428	42	42	42	50.7	50.7	50.7	92.834	0	313.38	322530000	471	A0A6N4CZD9	A0A6N4CZD9	2326
A0A6N4CSC5	Magnesium-transporting ATPase, P-type 1 (EC 7.2.2.14) (Mg(2+) transport ATPase, P-type 1)	ASJ32_10545	OTHER	CytoplasmicMembrane	P	Cation transporter/ATPase, N-terminus	23.7641	22.491	23.1634	23.7589	21.7366	21.2273	21.4912	21.0751	23.7641	22.491	23.1634	23.7589	21.7366	21.2273	21.4912	21.0751				+	Ctrl_IM_Fe_IM	2.89555	0.0321582	1.91178	5.68984	50	50	50	51.4	51.4	51.4	101.09	0	323.31	949520000	503	A0A6N4CSC5	A0A6N4CSC5	822
A0A6N4CUM0	RNA methyltransferase	ASJ32_15620	OTHER	Cytoplasmic	J	Belongs to the class I-like SAM-binding methyltransferase superfamily. RNA M5U methyltransferase family	27.7803	26.7577	27.2714	27.7817	25.8721	25.2036	25.9933	25.3237	27.7803	26.7577	27.2714	27.7817	25.8721	25.2036	25.9933	25.3237				+	Ctrl_IM_Fe_IM	2.91353	0.0314241	1.7996	5.73551	34	34	34	76	76	76	49.467	0	323.31	5453400000	1649	A0A6N4CUM0	A0A6N4CUM0	1343
A0A6N4CTD2	Collagenase	ASJ32_05395 GO994_19485	SP(Sec/SPI)	Extracellular	E	COG3291 FOG PKD repeat	25.4427	24.9085	24.8029	25.559	23.7688	23.6395	23.8667	22.9474	25.4427	24.9085	24.8029	25.559	23.7688	23.6395	23.8667	22.9474				+	Ctrl_IM_Fe_IM	2.92872	0.0311288	1.62266	5.77426	79	79	79	68.2	68.2	68.2	103.48	0	323.31	6478200000	5601	A0A6N4CTD2	A0A6N4CTD2	1054
A0A6P1H7A5	Biotin synthase (EC 2.8.1.6)	bioB ASJ32_18050 GO994_07515	OTHER	Cytoplasmic	H	Catalyzes the conversion of dethiobiotin (DTB) to biotin by the insertion of a sulfur atom into dethiobiotin via a radical- based mechanism	24.631	24.6016	23.7136	24.4553	22.6338	22.415	22.9657	22.8332	24.631	24.6016	23.7136	24.4553	22.6338	22.415	22.9657	22.8332				+	Ctrl_IM_Fe_IM	3.24762	0.0192045	1.63847	6.63495	29	29	29	81.2	81.2	81.2	40.455	0	323.31	997000000	686	A0A6P1H7A5	A0A6P1H7A5	2632
A0A6N4CW32	Heme exporter protein D	ccmD ASJ32_14360 GO994_07725	OTHER	CytoplasmicMembrane	U	Required for the export of heme to the periplasm for the biogenesis of c-type cytochromes	27.3133	26.2368	24.4682	25.9054	NaN	21.6011	NaN	NaN	27.3133	26.2368	24.4682	25.9054	20.427	21.6011	21.0339	22.1042				+	Ctrl_IM_Fe_IM	3.30544	0.017762	4.68936	6.80114	4	4	4	26.5	26.5	26.5	7.719	0.00039936	11.184	357180000	33	A0A6N4CW32	A0A6N4CW32	1659
A0A6N4CRP7	2',3'-cyclic-nucleotide 2'-phosphodiesterase/3'-nucleotidase (EC 3.1.3.6) (EC 3.1.4.16)	cpdB ASJ32_05610	LIPO(Sec/SPII)	Periplasmic	F	Belongs to the 5'-nucleotidase family	26.6775	26.5386	26.5134	27.1637	25.3078	25.3611	25.44	25.7373	26.6775	26.5386	26.5134	27.1637	25.3078	25.3611	25.44	25.7373				+	Ctrl_IM_Fe_IM	3.38942	0.0154108	1.26175	7.04842	50	50	50	75.7	75.7	75.7	72.717	0	323.31	3284800000	1651	A0A6N4CRP7	A0A6N4CRP7	692
A0A6N4CRJ5	Ribose-phosphate pyrophosphokinase (RPPK) (EC 2.7.6.1) (5-phospho-D-ribosyl alpha-1-diphosphate) (Phosphoribosyl diphosphate synthase) (Phosphoribosyl pyrophosphate synthase) (P-Rib-PP synthase) (PRPP synthase) (PRPPase)	prs ASJ32_21395	OTHER	Cytoplasmic	F	Involved in the biosynthesis of the central metabolite phospho-alpha-D-ribosyl-1-pyrophosphate (PRPP) via the transfer of pyrophosphoryl group from ATP to 1-hydroxyl of ribose-5-phosphate (Rib-5-P)	28.1178	28.863	28.4052	27.8858	26.6959	26.9478	26.707	26.6695	28.1178	28.863	28.4052	27.8858	26.6959	26.9478	26.707	26.6695				+	Ctrl_IM_Fe_IM	3.4059	0.0152447	1.56287	7.09779	44	44	44	87.9	87.9	87.9	34.227	0	323.31	34841000000	8659	A0A6N4CRJ5	A0A6N4CRJ5	665
A0A6N4CMT4	UPF0313 protein ASJ32_08035	ASJ32_08035	OTHER	Cytoplasmic	C	Domain of unknown function (DUF3362)	25.8021	24.9696	25.1976	25.4546	22.8215	21.0501	22.5504	21.9485	25.8021	24.9696	25.1976	25.4546	22.8215	21.0501	22.5504	21.9485				+	Ctrl_IM_Fe_IM	3.5581	0.0122361	3.26336	7.56735	75	75	75	89.9	89.9	89.9	88.47	0	323.31	2099800000	1464	A0A6N4CMT4	A0A6N4CMT4	125
A0A6N4CUT1	Adenylosuccinate synthetase (AMPSase) (AdSS) (EC 6.3.4.4) (IMP--aspartate ligase)	purA ASJ32_01490 GO994_07020	OTHER	Cytoplasmic	F	Plays an important role in the de novo pathway of purine nucleotide biosynthesis. Catalyzes the first committed step in the biosynthesis of AMP from IMP	25.9413	26.0346	25.7468	25.7012	24.0304	24.7803	24.2232	24.5872	25.9413	26.0346	25.7468	25.7012	24.0304	24.7803	24.2232	24.5872				+	Ctrl_IM_Fe_IM	3.60931	0.0114056	1.45072	7.73103	46	46	46	86.8	86.8	86.8	45.255	0	323.31	20597000000	3012	A0A6N4CUT1	A0A6N4CUT1	1387
A0A6N4CZ47	Ecotin (Serine protease inhibitor ecotin)	eco ASJ32_02410 GO994_09740	SP(Sec/SPI)	Periplasmic	M	General inhibitor of pancreatic serine proteases inhibits chymotrypsin, trypsin, elastases, factor X, kallikrein as well as a variety of other proteases	24.6332	24.6097	24.7568	25.103	23.5586	23.6712	23.6888	23.5539	24.6332	24.6097	24.7568	25.103	23.5586	23.6712	23.6888	23.5539				+	Ctrl_IM_Fe_IM	4.16253	0.00622965	1.15756	9.70264	15	15	15	84.4	84.4	84.4	18.256	0	323.31	1959200000	969	A0A6N4CZ47	A0A6N4CZ47	2277
A0A6P1H7Q1	GTP cyclohydrolase-2 (EC 3.5.4.25) (GTP cyclohydrolase II)	ribA ASJ32_21150 GO994_13880	OTHER	Cytoplasmic	H	Catalyzes the conversion of GTP to 2,5-diamino-6- ribosylamino-4(3H)-pyrimidinone 5'-phosphate (DARP), formate and pyrophosphate	24.9255	24.9869	25.2623	25.452	23.5543	22.7607	22.9701	23.1005	24.9255	24.9869	25.2623	25.452	23.5543	22.7607	22.9701	23.1005				+	Ctrl_IM_Fe_IM	4.2142	0.00580734	2.06028	9.90764	21	21	21	73.6	73.6	73.6	21.633	0	174.89	708800000	263	A0A6P1H7Q1	A0A6P1H7Q1	2642
Outer membrane
Majority protein IDs	Protein names	Gene names	SignalP	PSORTb	COG Category	eggNOG description	LFQ intensity Ctrl1_OM	LFQ intensity Ctrl2_OM	LFQ intensity Ctrl3_OM	LFQ intensity Ctrl4_OM	LFQ intensity Fe1_OM	LFQ intensity Fe2_OM	LFQ intensity Fe3_OM	LFQ intensity Fe4_OM	LFQ intensity Ctrl1_OM Imputed	LFQ intensity Ctrl2_OM Imputed	LFQ intensity Ctrl3_OM Imputed	LFQ intensity Ctrl4_OM Imputed	LFQ intensity Fe1_OM Imputed	LFQ intensity Fe2_OM Imputed	LFQ intensity Fe3_OM Imputed	LFQ intensity Fe4_OM Imputed	Only identified by site	Reverse	Potential contaminant	Student's T-test Significant Ctrl_OM_Fe_OM	Student's T-test significant	-Log Student's T-test p-value Ctrl_OM_Fe_OM	Student's T-test q-value Ctrl_OM_Fe_OM	Student's T-test Difference Ctrl_OM_Fe_OM	Student's T-test Test statistic Ctrl_OM_Fe_OM	Peptides	Razor + unique peptides	Unique peptides	Sequence coverage [%]	Unique + razor sequence coverage [%]	Unique sequence coverage [%]	Mol. weight [kDa]	Q-value	Score	Intensity	MS/MS count	Protein IDs	Majority protein IDs	id
Q6RBX6	Ligand-gated channel protein (Putative heme receptor) (Putative outer-membrane heme receptor)	hupA hutA ASJ32_00465	SP(Sec/SPI)	OuterMembrane	P	TonB dependent receptor	21.4774	21.7118	22.0872	21.9071	27.5086	27.9481	27.733	27.7972	21.4774	21.7118	22.0872	21.9071	27.5086	27.9481	27.733	27.7972				+	Ctrl_OM_Fe_OM	7.60486	1.02338e-05	-5.95086	-37.2857	108	108	108	93.3	93.3	93.3	76.971	0	323.31	72402000000	12985	Q6RBX6	Q6RBX6	2837
A0A6N4CZ10	Non ribosomal peptide synthetase BasB	ASJ32_09665 GO994_22180	OTHER	CytoplasmicMembrane	Q	Evidence 3 Function proposed based on presence of conserved amino acid motif, structural feature or limited homology	NaN	NaN	NaN	NaN	24.5681	25.0376	24.1748	25.3462	16.0808	16.278	15.346	15.7979	24.5681	25.0376	24.1748	25.3462				+	Ctrl_OM_Fe_OM	6.78517	3.37827e-05	-8.90599	-27.1775	51	51	51	72.6	72.6	72.6	81.319	0	323.31	32415000000	1833	A0A6N4CZ10	A0A6N4CZ10	2257
Q6SLH5	Ferric siderophore receptor (Ferric siderophore receptor B) (Ligand-gated channel protein)	fstB fstA ASJ32_09705	SP(Sec/SPI)	OuterMembrane	P	TonB dependent receptor	NaN	18.3001	17.5119	16.165	28.657	29.008	28.8184	28.7266	16.9489	18.3001	17.5119	16.165	28.657	29.008	28.8184	28.7266				+	Ctrl_OM_Fe_OM	6.60162	3.4368e-05	-11.571	-25.3153	106	106	106	92	92	92	88.281	0	323.31	174680000000	24060	Q6SLH5	Q6SLH5	2839
A0A6N4CRE6	Ligand-gated channel protein (TonB-dependent siderophore receptor)	ASJ32_06815 GO994_12210	SP(Sec/SPI)	OuterMembrane	P	Receptor	19.2692	18.4042	18.8274	18.6797	23.5713	23.7807	23.9677	23.3867	19.2692	18.4042	18.8274	18.6797	23.5713	23.7807	23.9677	23.3867				+	Ctrl_OM_Fe_OM	6.25703	5.69914e-05	-4.88147	-22.152	61	61	61	78.1	78.1	78.1	78.762	0	323.31	2558000000	1277	A0A6N4CRE6	A0A6N4CRE6	634
A0A6N4CXW3	Chitobiase	ASJ32_01560	OTHER	Unknown	S	Glycosyl hydrolase family 9	NaN	NaN	NaN	NaN	22.962	21.7124	21.8013	21.574	15.443	16.1642	15.3254	15.426	22.962	21.7124	21.8013	21.574				+	Ctrl_OM_Fe_OM	5.6041	0.000205036	-6.42274	-17.1821	16	16	16	28.7	28.7	28.7	64.335	0	95.969	245250000	48	A0A6N4CXW3	A0A6N4CXW3	2034
A0A6N4CQV6	Ligand-gated channel protein	ASJ32_06030	SP(Sec/SPI)	OuterMembrane	M	TonB dependent receptor	23.285	23.4681	23.3324	23.4769	24.6324	24.568	24.3483	24.5519	23.285	23.4681	23.3324	23.4769	24.6324	24.568	24.3483	24.5519				+	Ctrl_OM_Fe_OM	5.17329	0.00046074	-1.13452	-14.5131	76	76	76	82.5	82.5	82.5	75.351	0	323.31	3163400000	1751	A0A6N4CQV6	A0A6N4CQV6	529
A0A6N4CYP8	Peptide synthetase	ASJ32_09655	OTHER	Cytoplasmic	Q	Condensation domain	NaN	NaN	NaN	NaN	21.1584	19.9845	21.4415	21.0336	16.1666	16.2457	15.8333	15.4975	21.1584	19.9845	21.4415	21.0336				+	Ctrl_OM_Fe_OM	5.03548	0.000542397	-4.96874	-13.7464	122	122	122	73.7	73.7	73.7	160.57	0	323.31	26196000000	3390	A0A6N4CYP8	A0A6N4CYP8	2201
A5I8G1	Ligand-gated channel protein (Putative hemin receptor) (TonB-dependent hemoglobin/transferrin/lactoferrin family receptor)	hupA ASJ32_02385 GO994_09765	SP(Sec/SPI)	OuterMembrane	P	receptor	NaN	NaN	NaN	NaN	21.0276	22.3244	21.6292	22.9032	16.7824	16.4314	16.1877	16.3741	21.0276	22.3244	21.6292	22.9032				+	Ctrl_OM_Fe_OM	4.88444	0.000672003	-5.52721	-12.9501	66	66	65	77	77	77	80.389	0	323.31	3228500000	1147	A5I8G1	A5I8G1	2744
A0A6N4CXV2	Isochorismate synthase (EC 5.4.4.2)	ASJ32_11200	OTHER	Cytoplasmic	HQ	chorismate binding enzyme	NaN	NaN	NaN	NaN	21.2299	22.0837	22.5465	22.7502	15.0859	16.9555	16.4603	15.5273	21.2299	22.0837	22.5465	22.7502				+	Ctrl_OM_Fe_OM	4.54046	0.00122547	-6.1453	-11.2951	35	35	35	66.6	66.6	66.6	41.813	0	323.31	13174000000	1460	A0A6N4CXV2	A0A6N4CXV2	2028
A0A0K0MDT1	Non-ribosomal peptide synthetase (Peptide synthetase)	amoF ASJ32_11185	OTHER	CytoplasmicMembrane	Q	COG1020 Non-ribosomal peptide synthetase modules and related proteins	NaN	NaN	NaN	NaN	22.3385	22.037	21.394	22.2556	16.9207	16.2367	16.3428	14.6493	22.3385	22.037	21.394	22.2556				+	Ctrl_OM_Fe_OM	4.5266	0.00122547	-5.96885	-11.2327	88	88	88	66	66	66	111.43	0	323.31	28878000000	3277	A0A0K0MDT1	A0A0K0MDT1	2
A0A6N4CW88	Putative histamine N-monooxygenase (Rhizobactin siderophore biosynthesis protein RhbE)	basC ASJ32_09660 GO994_22185	OTHER	Cytoplasmic	Q	l-lysine 6-monooxygenase	NaN	NaN	NaN	NaN	20.9574	21.1041	20.0044	22.2088	16.1647	15.9616	15.1037	15.9701	20.9574	21.1041	20.0044	22.2088				+	Ctrl_OM_Fe_OM	4.31874	0.0017979	-5.26864	-10.3343	40	40	40	62.7	62.7	62.7	49.683	0	323.31	10586000000	1935	A0A6N4CW88	A0A6N4CW88	1698
Q6RBX7	Colicin receptor (TonB-dependent receptor)	fstC ASJ32_11140	SP(Sec/SPI)	OuterMembrane	P	Receptor	25.6146	26.0597	25.9466	26.2896	28.2594	28.1254	27.9017	27.6169	25.6146	26.0597	25.9466	26.2896	28.2594	28.1254	27.9017	27.6169				+	Ctrl_OM_Fe_OM	4.25077	0.00192728	-1.99823	-10.0551	87	87	87	83.6	83.6	83.6	71.655	0	323.31	65832000000	13376	Q6RBX7	Q6RBX7	2838
A0A0K0MDT9	Peptide synthetase	amoH ASJ32_11170	OTHER	Cytoplasmic	Q	COG1020 Non-ribosomal peptide synthetase modules and related proteins	NaN	NaN	NaN	NaN	19.406	19.6604	19.6364	20.5575	15.9991	16.9593	15.576	16.5343	19.406	19.6604	19.6364	20.5575				+	Ctrl_OM_Fe_OM	3.97142	0.00293352	-3.54788	-8.97697	37	37	37	55.4	55.4	55.4	58.065	0	323.31	1989700000	473	A0A0K0MDT9	A0A0K0MDT9	3
A0A6N4CWZ7	Phospho-2-dehydro-3-deoxyheptonate aldolase (EC 2.5.1.54)	ASJ32_13325	OTHER	Cytoplasmic	E	Stereospecific condensation of phosphoenolpyruvate (PEP) and D-erythrose-4-phosphate (E4P) giving rise to 3-deoxy-D- arabino-heptulosonate-7-phosphate (DAHP)	NaN	NaN	NaN	NaN	21.5268	19.2799	20.892	20.6212	15.5147	16.8041	15.7506	14.8646	21.5268	19.2799	20.892	20.6212				+	Ctrl_OM_Fe_OM	3.63003	0.00603593	-4.84648	-7.79811	28	27	26	70.4	70.4	68.5	40.105	0	323.31	4312100000	660	A0A6N4CWZ7	A0A6N4CWZ7	1853
A5I8G4	Hypothetical iron regulator protein (Iron-regulated protein)	phuW ASJ32_00460 GO994_17220	LIPO(Sec/SPII)	Unknown	S	Haem-binding uptake, Tiki superfamily, ChaN	NaN	NaN	NaN	NaN	19.5737	19.7897	18.5779	19.4533	16.148	17.0726	15.3682	16.0075	19.5737	19.7897	18.5779	19.4533				+	Ctrl_OM_Fe_OM	3.45834	0.00843536	-3.19957	-7.25681	30	30	30	66.1	66.1	66.1	35.766	0	323.31	3494700000	1073	A5I8G4	A5I8G4	2746
A5I8G7	Heme utilization protein HutZ	hutZ ASJ32_00445	OTHER	Cytoplasmic	P	Pfam:Pyridox_oxidase	NaN	NaN	NaN	NaN	18.1295	19.5336	20.1033	18.7427	15.3514	16.1468	16.2573	15.1759	18.1295	19.5336	20.1033	18.7427				+	Ctrl_OM_Fe_OM	3.23932	0.0110116	-3.39442	-6.61137	32	32	32	96.2	96.2	96.2	20.843	0	323.31	9174300000	1036	A5I8G7	A5I8G7	2748
A0A6N4CZH3	ABC transporter ATP-binding protein (ATP-binding cassette domain-containing protein)	ASJ32_09675 GO994_22170	OTHER	CytoplasmicMembrane	V	ABC transporter transmembrane region	NaN	NaN	NaN	NaN	21.9259	21.0635	20.8044	22.0313	17.3776	17.2574	15.6706	14.1603	21.9259	21.0635	20.8044	22.0313				+	Ctrl_OM_Fe_OM	3.20706	0.0110116	-5.33979	-6.52031	39	39	39	54.5	54.5	54.5	64.887	0	323.31	7300800000	1053	A0A6N4CZH3	A0A6N4CZH3	2344
A0A6N4CYM8	ABC transporter substrate-binding protein (Ferric anguibactin-binding protein)	ASJ32_09700 GO994_22145	LIPO(Sec/SPII)	Unknown	P	Periplasmic binding protein	NaN	NaN	NaN	NaN	22.5125	20.0491	22.8923	20.3592	15.1588	16.441	15.9859	17.7585	22.5125	20.0491	22.8923	20.3592				+	Ctrl_OM_Fe_OM	2.87287	0.0197182	-5.11723	-5.63266	32	32	32	82.4	82.4	82.4	35.811	0	323.31	20715000000	1726	A0A6N4CYM8	A0A6N4CYM8	2187
A0A6N4D0H8	Autotransporter	ASJ32_00930 GO994_06435	SP(Sec/SPI)	OuterMembrane	-	-	23.1815	22.9456	23.5785	23.5788	24.1706	24.2681	24.0566	24.2671	23.1815	22.9456	23.5785	23.5788	24.1706	24.2681	24.0566	24.2671				+	Ctrl_OM_Fe_OM	2.73624	0.0240825	-0.869505	-5.29674	21	21	21	67.5	67.5	67.5	22.62	0	323.31	2205000000	1248	A0A6N4D0H8	A0A6N4D0H8	2507
A0A6N4CUH4	TonB-dependent receptor	ASJ32_04900	SP(Sec/SPI)	OuterMembrane	P	Receptor	23.1543	23.3713	23.0521	23.7002	24.2497	24.8015	24.7629	24.15	23.1543	23.3713	23.0521	23.7002	24.2497	24.8015	24.7629	24.15				+	Ctrl_OM_Fe_OM	2.72843	0.0240825	-1.17155	-5.27799	68	68	68	72.4	72.4	72.4	93.572	0	323.31	4402300000	2361	A0A6N4CUH4	A0A6N4CUH4	1308
A0A6P1H4K8	Glutamate 5-kinase (EC 2.7.2.11) (Gamma-glutamyl kinase) (GK)	proB ASJ32_04845 GO994_04665	OTHER	Cytoplasmic	E	Catalyzes the transfer of a phosphate group to glutamate to form L-glutamate 5-phosphate	NaN	NaN	NaN	NaN	19.1429	18.0514	19.4592	19.8125	16.5677	16.9302	15.7592	14.7995	19.1429	18.0514	19.4592	19.8125				+	Ctrl_OM_Fe_OM	2.65772	0.0274577	-3.10238	-5.11019	39	39	39	87.2	87.2	87.2	39.373	0	323.31	3743200000	1195	A0A6P1H4K8	A0A6P1H4K8	2584
A0A6N4D032	Ligand-gated channel	ASJ32_09730	SP(Sec/SPI)	OuterMembrane	P	TonB dependent receptor	23.6768	23.3965	24.1068	23.9383	24.6243	24.727	24.4422	24.8265	23.6768	23.3965	24.1068	23.9383	24.6243	24.727	24.4422	24.8265				+	Ctrl_OM_Fe_OM	2.60298	0.0302298	-0.875414	-4.98282	50	50	50	74.2	74.2	74.2	77.45	0	323.31	6526100000	3221	A0A6N4D032	A0A6N4D032	2450
A0A6N4CYL8	Non-ribosomal peptide synthetase	ASJ32_11175	OTHER	CytoplasmicMembrane	Q	COG1020 Non-ribosomal peptide synthetase modules and related proteins	NaN	NaN	NaN	NaN	20.2739	19.1937	18.0361	19.284	15.273	16.7697	15.7501	17.0188	20.2739	19.1937	18.0361	19.284				+	Ctrl_OM_Fe_OM	2.54523	0.0332223	-2.994	-4.85073	103	103	103	55.7	55.7	55.7	228.57	0	323.31	4605100000	1086	A0A6N4CYL8	A0A6N4CYL8	2182
A0A6N4CWY0	2,3-dihydroxybenzoate-AMP ligase (EC 2.7.7.58)	entE ASJ32_11195	OTHER	Cytoplasmic	Q	AMP-binding enzyme C-terminal domain	NaN	NaN	NaN	NaN	21.4385	21.311	20.5379	18.54	17.5964	16.9368	15.5375	14.9745	21.4385	21.311	20.5379	18.54				+	Ctrl_OM_Fe_OM	2.45293	0.0365604	-4.19556	-4.64438	49	49	49	73.7	73.7	73.7	59.936	0	323.31	12261000000	1636	A0A6N4CWY0	A0A6N4CWY0	1843
A0A6N4CSP5	Ligand-gated channel protein	ASJ32_05285	LIPO(Sec/SPII)	OuterMembrane	H	TonB-dependent copper receptor	20.424	20.8474	21.154	21.2678	20.1118	20.2548	19.9834	19.9562	20.424	20.8474	21.154	21.2678	20.1118	20.2548	19.9834	19.9562				+	Ctrl_OM_Fe_OM	2.25475	0.0498187	0.846734	4.21983	43	43	43	62.9	62.9	62.9	72.697	0	259.34	407180000	571	A0A6N4CSP5	A0A6N4CSP5	892
A0A6N4CRJ5	Ribose-phosphate pyrophosphokinase (RPPK) (EC 2.7.6.1) (5-phospho-D-ribosyl alpha-1-diphosphate) (Phosphoribosyl diphosphate synthase) (Phosphoribosyl pyrophosphate synthase) (P-Rib-PP synthase) (PRPP synthase) (PRPPase)	prs ASJ32_21395	OTHER	Cytoplasmic	F	Involved in the biosynthesis of the central metabolite phospho-alpha-D-ribosyl-1-pyrophosphate (PRPP) via the transfer of pyrophosphoryl group from ATP to 1-hydroxyl of ribose-5-phosphate (Rib-5-P)	18.6518	21.2459	19.7732	20.6531	NaN	18.1561	NaN	NaN	18.6518	21.2459	19.7732	20.6531	15.693	18.1561	15.4188	16.3632				+	Ctrl_OM_Fe_OM	2.33951	0.0418963	3.67321	4.39845	44	44	44	87.9	87.9	87.9	34.227	0	323.31	34841000000	8659	A0A6N4CRJ5	A0A6N4CRJ5	665
A0A6N4CR49	Elongation factor 4 (EF-4) (EC 3.6.5.n1) (Ribosomal back-translocase LepA)	lepA ASJ32_17675	OTHER	CytoplasmicMembrane	M	Required for accurate and efficient protein synthesis under certain stress conditions. May act as a fidelity factor of the translation reaction, by catalyzing a one-codon backward translocation of tRNAs on improperly translocated ribosomes. Back- translocation proceeds from a post-translocation (POST) complex to a pre-translocation (PRE) complex, thus giving elongation factor G a second chance to…	21.2958	20.8	20.5981	20.9753	20.07	19.6054	20.2951	20.0083	21.2958	20.8	20.5981	20.9753	20.07	19.6054	20.2951	20.0083				+	Ctrl_OM_Fe_OM	2.37553	0.0394376	0.922638	4.47568	43	43	43	57	57	57	65.967	0	323.31	6788200000	2058	A0A6N4CR49	A0A6N4CR49	576
A0A6N4CWA6	Poly-beta-1,6 N-acetyl-D-glucosamine export porin PgaA	ASJ32_03475	SP(Sec/SPI)	CytoplasmicMembrane	H	Exports the biofilm adhesin polysaccharide poly-beta- 1,6-N-acetyl-D-glucosamine (PGA) across the outer membrane. The PGA transported seems to be partially N-deacetylated since N- deacetylation of PGA by PgaB is needed for PGA export through the PgaA porin	21.2291	20.6302	20.7178	20.8896	20.3111	19.674	19.3454	19.8266	21.2291	20.6302	20.7178	20.8896	20.3111	19.674	19.3454	19.8266				+	Ctrl_OM_Fe_OM	2.37768	0.0394376	1.07742	4.48031	38	38	38	47.6	47.6	47.6	89.887	0	323.31	3227300000	457	A0A6N4CWA6	A0A6N4CWA6	1708
A0A6N4CTJ1	33 kDa chaperonin (Heat shock protein 33 homolog) (HSP33)	hslO ASJ32_05645	OTHER	Cytoplasmic	O	Redox regulated molecular chaperone. Protects both thermally unfolding and oxidatively damaged proteins from irreversible aggregation. Plays an important role in the bacterial defense system toward oxidative stress	17.8622	19.0988	17.6479	17.2111	NaN	NaN	NaN	NaN	17.8622	19.0988	17.6479	17.2111	16.1731	15.3867	16.0063	16.1559				+	Ctrl_OM_Fe_OM	2.40982	0.0381792	2.02452	4.54995	17	17	17	68	68	68	33.12	0	323.31	835010000	372	A0A6N4CTJ1	A0A6N4CTJ1	1097
A0A6P1H5F1	tRNA-2-methylthio-N(6)-dimethylallyladenosine synthase (EC 2.8.4.3) ((Dimethylallyl)adenosine tRNA methylthiotransferase MiaB) (tRNA-i(6)A37 methylthiotransferase)	miaB ASJ32_17065 GO994_05655	OTHER	Cytoplasmic	J	Catalyzes the methylthiolation of N6- (dimethylallyl)adenosine (i(6)A), leading to the formation of 2- methylthio-N6-(dimethylallyl)adenosine (ms(2)i(6)A) at position 37 in tRNAs that read codons beginning with uridine	19.0102	18.4505	19.0287	18.7889	NaN	NaN	NaN	NaN	19.0102	18.4505	19.0287	18.7889	15.4062	15.12	17.7386	16.0399				+	Ctrl_OM_Fe_OM	2.41403	0.0381792	2.74341	4.55911	40	40	40	90.1	90.1	90.1	53.41	0	323.31	2457300000	1076	A0A6P1H5F1	A0A6P1H5F1	2595
A0A6N4CTC0	Histidine kinase (EC 2.7.13.3)	ASJ32_14305	OTHER	Cytoplasmic	NT	Signal transducing histidine kinase, homodimeric domain	19.8359	19.9173	19.589	18.9004	17.9855	NaN	NaN	NaN	19.8359	19.9173	19.589	18.9004	17.9855	15.6155	16.2396	14.6274				+	Ctrl_OM_Fe_OM	2.44983	0.0365604	3.4436	4.63755	33	33	32	43.9	43.9	43.9	76.984	0	323.31	1894700000	727	A0A6N4CTC0	A0A6N4CTC0	1047
A0A6N4CXF1	Amidophosphoribosyltransferase (ATase) (EC 2.4.2.14) (Glutamine phosphoribosylpyrophosphate amidotransferase) (GPATase)	purF ASJ32_11790 GO994_12990	OTHER	Cytoplasmic	F	Catalyzes the formation of phosphoribosylamine from phosphoribosylpyrophosphate (PRPP) and glutamine	20.9562	21.0246	20.9644	20.9943	19.8697	18.715	NaN	19.1253	20.9562	21.0246	20.9644	20.9943	19.8697	18.715	17.6882	19.1253				+	Ctrl_OM_Fe_OM	2.474	0.0364014	2.13535	4.69098	54	54	54	75.9	75.9	75.9	56.213	0	323.31	21999000000	5110	A0A6N4CXF1	A0A6N4CXF1	1938
A0A6N4CTD2	Collagenase	ASJ32_05395 GO994_19485	SP(Sec/SPI)	Extracellular	E	COG3291 FOG PKD repeat	18.865	18.4478	18.5166	18.4543	NaN	NaN	NaN	NaN	18.865	18.4478	18.5166	18.4543	16.153	17.2259	15.3061	14.5623				+	Ctrl_OM_Fe_OM	2.49986	0.035224	2.75914	4.74859	79	79	79	68.2	68.2	68.2	103.48	0	323.31	6478200000	5601	A0A6N4CTD2	A0A6N4CTD2	1054
A0A6N4CPI2	DEAD/DEAH box helicase	ASJ32_15865 GO994_03170	OTHER	Cytoplasmic	L	DEAD-box RNA helicase involved in ribosome assembly. Has RNA-dependent ATPase activity and unwinds double-stranded RNA	19.9406	19.6406	19.5869	18.9194	NaN	NaN	18.0889	NaN	19.9406	19.6406	19.5869	18.9194	16.0337	15.232	18.0889	15.4282				+	Ctrl_OM_Fe_OM	2.53716	0.0332223	3.32617	4.83248	24	24	24	54.7	54.7	54.7	45.152	0	323.31	473690000	371	A0A6N4CPI2	A0A6N4CPI2	284
A0A6N4CMQ0	Uncharacterized protein	ASJ32_19760	LIPO(Sec/SPII)	Unknown	/	/	22.8555	22.2107	22.1447	21.8218	21.0348	20.3532	20.9915	20.9571	22.8555	22.2107	22.1447	21.8218	21.0348	20.3532	20.9915	20.9571				+	Ctrl_OM_Fe_OM	2.72805	0.0240825	1.42403	5.27706	11	11	11	75.3	75.3	75.3	7.7997	0	323.31	7637100000	888	A0A6N4CMQ0	A0A6N4CMQ0	116
A0A6N4CT33	Translation initiation factor IF-2	infB ASJ32_04260	OTHER	Cytoplasmic	J	One of the essential components for the initiation of protein synthesis. Protects formylmethionyl-tRNA from spontaneous hydrolysis and promotes its binding to the 30S ribosomal subunits. Also involved in the hydrolysis of GTP during the formation of the 70S ribosomal complex	23.34	22.4962	22.949	22.4678	20.0714	21.2496	21.0084	21.3349	23.34	22.4962	22.949	22.4678	20.0714	21.2496	21.0084	21.3349				+	Ctrl_OM_Fe_OM	2.74711	0.0240825	1.89717	5.32294	171	171	171	97.2	97.2	97.2	98.375	0	323.31	98386000000	18908	A0A6N4CT33	A0A6N4CT33	986
A0A6N4CVE4	Dihydrolipoyl dehydrogenase (EC 1.8.1.4)	lpdA ASJ32_15000 GO994_02485	OTHER	Cytoplasmic	C	COG1249 Pyruvate 2-oxoglutarate dehydrogenase complex, dihydrolipoamide dehydrogenase (E3) component, and related enzymes	20.8692	21.3691	20.807	20.2924	19.1498	18.9887	19.5631	18.6091	20.8692	21.3691	20.807	20.2924	19.1498	18.9887	19.5631	18.6091				+	Ctrl_OM_Fe_OM	2.99251	0.0155247	1.75678	5.93922	68	68	68	74.3	74.3	74.3	50.368	0	323.31	52860000000	10099	A0A6N4CVE4	A0A6N4CVE4	1510
A0A6N4CUH7	ABC transporter ATP-binding protein (ABC-F family ATPase)	ASJ32_16830 GO994_08700	OTHER	Cytoplasmic	S	ABC transporter	20.3835	20.2262	20.2692	20.3286	19.3425	19.0116	18.4504	19.3312	20.3835	20.2262	20.2692	20.3286	19.3425	19.0116	18.4504	19.3312				+	Ctrl_OM_Fe_OM	3.00984	0.0154911	1.26797	5.98464	61	61	61	80	80	80	59.184	0	323.31	15591000000	3449	A0A6N4CUH7	A0A6N4CUH7	1311
A0A6N4CZG0	Vitamin B12-dependent ribonucleotide reductase (EC 1.17.4.1)	ASJ32_00015	OTHER	Cytoplasmic	F	Catalyzes the reduction of ribonucleotides to deoxyribonucleotides. May function to provide a pool of deoxyribonucleotide precursors for DNA repair during oxygen limitation and or for immediate growth after restoration of oxygen	18.9009	18.9129	19.8902	19.2865	NaN	NaN	NaN	17.3241	18.9009	18.9129	19.8902	19.2865	15.7474	16.6759	15.7409	17.3241				+	Ctrl_OM_Fe_OM	3.15838	0.0114441	2.87552	6.38477	47	47	47	67.4	67.4	67.4	79.346	0	323.31	2328900000	1337	A0A6N4CZG0	A0A6N4CZG0	2337
A0A6N4CPW5	Alanine--tRNA ligase (EC 6.1.1.7) (Alanyl-tRNA synthetase) (AlaRS)	alaS ASJ32_05840	OTHER	Cytoplasmic	J	Catalyzes the attachment of alanine to tRNA(Ala) in a two-step reaction alanine is first activated by ATP to form Ala- AMP and then transferred to the acceptor end of tRNA(Ala). Also edits incorrectly charged Ser-tRNA(Ala) and Gly-tRNA(Ala) via its editing domain	20.0632	20.4283	20.0863	20.3779	19.2045	18.4044	19.128	18.6356	20.0632	20.4283	20.0863	20.3779	19.2045	18.4044	19.128	18.6356				+	Ctrl_OM_Fe_OM	3.19284	0.0110116	1.39578	6.48048	112	112	112	84.2	84.2	84.2	95.778	0	323.31	36826000000	8383	A0A6N4CPW5	A0A6N4CPW5	351
A0A6N4CVH0	Lipase	ASJ32_15345	LIPO(Sec/SPII)	Extracellular	I	Bacterial virulence factor lipase N-terminal	21.8922	21.6126	21.7088	21.355	20.2967	20.7785	19.9627	20.2536	21.8922	21.6126	21.7088	21.355	20.2967	20.7785	19.9627	20.2536				+	Ctrl_OM_Fe_OM	3.20273	0.0110116	1.31927	6.50816	42	42	42	68.4	68.4	68.4	82.553	0	323.31	9891500000	5056	A0A6N4CVH0	A0A6N4CVH0	1528
A0A6N4CRQ5	Thiazole synthase (EC 2.8.1.10)	thiG ASJ32_06120	OTHER	Cytoplasmic	H	Catalyzes the rearrangement of 1-deoxy-D-xylulose 5- phosphate (DXP) to produce the thiazole phosphate moiety of thiamine. Sulfur is provided by the thiocarboxylate moiety of the carrier protein ThiS. In vitro, sulfur can be provided by H(2)S	18.3161	17.9895	17.8735	17.7874	NaN	NaN	NaN	NaN	18.3161	17.9895	17.8735	17.7874	14.9248	15.5307	16.2834	14.5721				+	Ctrl_OM_Fe_OM	3.30041	0.0103147	2.66388	6.78654	27	27	27	85.9	85.9	85.9	26.556	0	261.45	1036800000	481	A0A6N4CRQ5	A0A6N4CRQ5	696
A0A6N4CNI2	ATP-dependent RNA helicase RhlE	ASJ32_07200	OTHER	Cytoplasmic	L	DEAD-box RNA helicase involved in ribosome assembly. Has RNA-dependent ATPase activity and unwinds double-stranded RNA	23.6939	23.5854	22.6242	23.3772	21.8258	21.4841	21.49	21.375	23.6939	23.5854	22.6242	23.3772	21.8258	21.4841	21.49	21.375				+	Ctrl_OM_Fe_OM	3.31488	0.0103147	1.77645	6.82858	49	47	47	83.2	81	81	50.826	0	323.31	9099600000	2336	A0A6N4CNI2	A0A6N4CNI2	175
A0A6N4CT59	ATP-dependent RNA helicase DeaD (EC 3.6.4.13) (Cold-shock DEAD box protein A)	deaD csdA ASJ32_20030	OTHER	Cytoplasmic	JKL	DEAD-box RNA helicase involved in various cellular processes at low temperature, including ribosome biogenesis, mRNA degradation and translation initiation	25.6806	25.5879	25.7091	25.8403	25.0356	24.5088	24.941	24.6696	25.6806	25.5879	25.7091	25.8403	25.0356	24.5088	24.941	24.6696				+	Ctrl_OM_Fe_OM	3.35034	0.0102161	0.915729	6.93246	107	107	107	98.4	98.4	98.4	68.518	0	323.31	165100000000	22543	A0A6N4CT59	A0A6N4CT59	1004
A0A6N4CMT4	UPF0313 protein ASJ32_08035	ASJ32_08035	OTHER	Cytoplasmic	C	Domain of unknown function (DUF3362)	19.4168	20.992	20.3906	21.1167	15.2681	NaN	NaN	NaN	19.4168	20.992	20.3906	21.1167	15.2681	15.8746	16.6539	15.7675				+	Ctrl_OM_Fe_OM	4.11363	0.00226538	4.58801	9.51217	75	75	75	89.9	89.9	89.9	88.47	0	323.31	2099800000	1464	A0A6N4CMT4	A0A6N4CMT4	125
A0A6N4CYG3	Glutamate synthase (Glutamate synthase large subunit) (EC 1.4.1.13)	gltB ASJ32_10325 GO994_08150	OTHER	Cytoplasmic	E	glutamate synthase	20.7561	20.7067	20.3256	20.8522	19.0764	18.7117	19.2851	18.8237	20.7561	20.7067	20.3256	20.8522	19.0764	18.7117	19.2851	18.8237				+	Ctrl_OM_Fe_OM	4.17449	0.00212063	1.68594	9.74975	154	154	153	82.4	82.4	82.4	162.62	0	323.31	35170000000	10603	A0A6N4CYG3	A0A6N4CYG3	2152
Extracellular
Majority protein IDs	Protein names	Gene names	SignalP	PSORTb	COG Category	eggNOG description	LFQ intensity Ctrl1_Extra	LFQ intensity Ctrl2_Extra	LFQ intensity Ctrl3_Extra	LFQ intensity Ctrl4_Extra	LFQ intensity Fe1_Extra	LFQ intensity Fe2_Extra	LFQ intensity Fe3_Extra	LFQ intensity Fe4_Extra	LFQ intensity Ctrl1_Extra Imputed	LFQ intensity Ctrl2_Extra Imputed	LFQ intensity Ctrl3_Extra Imputed	LFQ intensity Ctrl4_Extra Imputed	LFQ intensity Fe1_Extra Imputed	LFQ intensity Fe2_Extra Imputed	LFQ intensity Fe3_Extra Imputed	LFQ intensity Fe4_Extra Imputed	Only identified by site	Reverse	Potential contaminant	Student's T-test Significant Ctrl_Extra_Fe_Extra	Student's T-test significant	-Log Student's T-test p-value Ctrl_Extra_Fe_Extra	Student's T-test q-value Ctrl_Extra_Fe_Extra	Student's T-test Difference Ctrl_Extra_Fe_Extra	Student's T-test Test statistic Ctrl_Extra_Fe_Extra	Peptides	Razor + unique peptides	Unique peptides	Sequence coverage [%]	Unique + razor sequence coverage [%]	Unique sequence coverage [%]	Mol. weight [kDa]	Q-value	Score	Intensity	MS/MS count	Protein IDs	Majority protein IDs	id
A0A6N4CW59	Chromosome partitioning protein ParB	ASJ32_15800 GO994_18705	SP(Sec/SPI)	Unknown	S	Putative ParB-like nuclease	NaN	NaN	NaN	NaN	18.5765	18.775	18.316	18.2973	13.1354	12.8879	12.4277	13.0153	18.5765	18.775	18.316	18.2973				+	Ctrl_Extra_Fe_Extra	6.9757	3.44337e-05	-5.62463	-29.2531	9	9	9	46.4	46.4	46.4	26.408	0.00042088	20.016	133890000	107	A0A6N4CW59	A0A6N4CW59	1680
A0A6N4CZU3	Uncharacterized protein	ASJ32_02400	LIPO(Sec/SPII)	Unknown	N	Protein of unknown function (DUF1566)	NaN	NaN	NaN	NaN	18.8859	19.8825	18.7082	19.0235	12.5983	13.0356	12.2702	13.302	18.8859	19.8825	18.7082	19.0235				+	Ctrl_Extra_Fe_Extra	5.75573	0.000107584	-6.32353	-18.2294	19	19	19	54.8	54.8	54.8	49.417	0	323.31	1906500000	458	A0A6N4CZU3	A0A6N4CZU3	2403
Q6RBX6	Ligand-gated channel protein (Putative heme receptor) (Putative outer-membrane heme receptor)	hupA hutA ASJ32_00465	SP(Sec/SPI)	OuterMembrane	P	TonB dependent receptor	NaN	11.0779	12.3096	12.4817	19.7468	20.779	20.3936	20.4381	13.0128	11.0779	12.3096	12.4817	19.7468	20.779	20.3936	20.4381				+	Ctrl_Extra_Fe_Extra	5.65909	0.000107584	-8.11886	-17.555	108	108	108	93.3	93.3	93.3	76.971	0	323.31	72402000000	12985	Q6RBX6	Q6RBX6	2837
Q6SLH5	Ferric siderophore receptor (Ferric siderophore receptor B) (Ligand-gated channel protein)	fstB fstA ASJ32_09705	SP(Sec/SPI)	OuterMembrane	P	TonB dependent receptor	NaN	NaN	NaN	NaN	20.6208	22.4437	21.7577	21.9801	14.0027	12.4366	13.7646	13.156	20.6208	22.4437	21.7577	21.9801				+	Ctrl_Extra_Fe_Extra	5.4248	0.000142353	-8.36058	-16.0186	106	106	106	92	92	92	88.281	0	323.31	174680000000	24060	Q6SLH5	Q6SLH5	2839
A0A6N4CZ10	Non ribosomal peptide synthetase BasB	ASJ32_09665 GO994_22180	OTHER	CytoplasmicMembrane	Q	Evidence 3 Function proposed based on presence of conserved amino acid motif, structural feature or limited homology	NaN	NaN	NaN	NaN	18.7126	18.413	18.611	18.2813	13.5572	12.2131	13.1049	13.6737	18.7126	18.413	18.611	18.2813				+	Ctrl_Extra_Fe_Extra	5.34691	0.000145867	-5.36725	-15.5371	51	51	51	72.6	72.6	72.6	81.319	0	323.31	32415000000	1833	A0A6N4CZ10	A0A6N4CZ10	2257
A0A6N4CW58	HlyD_D23 domain-containing protein	ASJ32_09485	OTHER	CytoplasmicMembrane	M	Belongs to the membrane fusion protein (MFP) (TC 8.A.1) family	NaN	NaN	NaN	NaN	18.257	17.6878	17.7219	18.2379	13.2972	13.6025	13.9082	12.5233	18.257	17.6878	17.7219	18.2379				+	Ctrl_Extra_Fe_Extra	5.04802	0.000246379	-4.64335	-13.8146	43	43	43	67.1	67.1	67.1	40.225	0	323.31	33885000000	6441	A0A6N4CW58	A0A6N4CW58	1679
A0A6N4CS41	Isochorismatase (EC 3.3.2.1)	ASJ32_11190 GO994_14110	OTHER	Cytoplasmic	Q	Isochorismatase	NaN	NaN	NaN	NaN	19.4391	18.2518	18.4991	17.9527	12.9159	13.6732	13.5101	13.8081	19.4391	18.2518	18.4991	17.9527				+	Ctrl_Extra_Fe_Extra	4.97691	0.000270195	-5.05889	-13.4323	33	33	33	79.8	79.8	79.8	33.93	0	323.31	14001000000	1024	A0A6N4CS41	A0A6N4CS41	768
A0A0K0MDT1	Non-ribosomal peptide synthetase (Peptide synthetase)	amoF ASJ32_11185	OTHER	CytoplasmicMembrane	Q	COG1020 Non-ribosomal peptide synthetase modules and related proteins	NaN	NaN	NaN	NaN	17.8135	16.6144	17.2737	17.3332	13.5967	13.8241	13.9804	13.979	17.8135	16.6144	17.2737	17.3332				+	Ctrl_Extra_Fe_Extra	4.89458	0.000315713	-3.41365	-13.0022	88	88	88	66	66	66	111.43	0	323.31	28878000000	3277	A0A0K0MDT1	A0A0K0MDT1	2
A0A6N4CZ48	Nickel transporter	ASJ32_02290	SP(Sec/SPI)	Periplasmic	ET	Belongs to the bacterial solute-binding protein 3 family	20.9767	20.8307	21.067	21.0944	22.5666	23.2825	22.8851	22.9884	20.9767	20.8307	21.067	21.0944	22.5666	23.2825	22.8851	22.9884				+	Ctrl_Extra_Fe_Extra	4.72922	0.000420007	-1.93843	-12.1772	44	44	44	84.8	84.8	84.8	28.483	0	323.31	5697300000	2356	A0A6N4CZ48	A0A6N4CZ48	2278
A0A6N4CUJ9	Endolytic peptidoglycan transglycosylase RlpA (EC 4.2.2.-)	rlpA ASJ32_16985	LIPO(Sec/SPII)	Unknown	M	Lytic transglycosylase with a strong preference for naked glycan strands that lack stem peptides	NaN	NaN	NaN	NaN	17.1759	18.46	17.0128	18.4219	13.0416	13.2136	12.9406	13.3666	17.1759	18.46	17.0128	18.4219				+	Ctrl_Extra_Fe_Extra	4.59135	0.000501025	-4.62709	-11.5269	30	30	30	74.4	74.4	74.4	33.815	0	323.31	2680500000	1401	A0A6N4CUJ9	A0A6N4CUJ9	1327
A0A6N4CZ49	ATP synthase subunit b (ATP synthase F(0) sector subunit b) (ATPase subunit I) (F-type ATPase subunit b) (F-ATPase subunit b)	atpF ASJ32_09775 GO994_22070	OTHER	CytoplasmicMembrane	C	Component of the F(0) channel, it forms part of the peripheral stalk, linking F(1) to F(0)	NaN	NaN	NaN	NaN	19.0918	17.3464	18.6555	18.6409	12.3468	13.1325	12.9923	13.813	19.0918	17.3464	18.6555	18.6409				+	Ctrl_Extra_Fe_Extra	4.50051	0.000566135	-5.36248	-11.1162	37	37	37	85.3	85.3	85.3	17.063	0	323.31	46054000000	3986	A0A6N4CZ49	A0A6N4CZ49	2279
A0A6N4CZ72	Peptidase M36	ASJ32_02395	SP(Sec/SPI)	Unknown	O	Proprotein convertase P-domain	NaN	NaN	NaN	NaN	17.7295	16.3161	17.6031	17.4111	12.8486	12.8966	13.1982	11.9406	17.7295	16.3161	17.6031	17.4111				+	Ctrl_Extra_Fe_Extra	4.42174	0.000574488	-4.54392	-10.7709	49	49	49	64.9	64.9	64.9	88.374	0	323.31	2582800000	901	A0A6N4CZ72	A0A6N4CZ72	2291
A0A6N4CN63	Uncharacterized protein	ASJ32_18100 GO994_07580	SP(Sec/SPI)	Unknown	/	/	17.0317	16.4982	17.1819	17.4543	20.041	20.3778	21.2796	20.6888	17.0317	16.4982	17.1819	17.4543	20.041	20.3778	21.2796	20.6888				+	Ctrl_Extra_Fe_Extra	4.41274	0.000574488	-3.55527	-10.7321	26	26	26	68.9	68.9	68.9	21.204	0	323.31	1468300000	1129	A0A6N4CN63	A0A6N4CN63	149
A0A6N4CSV6	Hemolysin	ASJ32_18165	SP(Sec/SPI)	Extracellular	S	hemolysis in other organism	16.4235	16.2968	15.5996	16.3044	19.1133	18.3731	18.6586	18.8123	16.4235	16.2968	15.5996	16.3044	19.1133	18.3731	18.6586	18.8123				+	Ctrl_Extra_Fe_Extra	4.38864	0.000595355	-2.58328	-10.6288	45	45	45	69.7	69.7	69.7	68.528	0	323.31	877010000	678	A0A6N4CSV6	A0A6N4CSV6	932
A0A6N4CZ88	Outer membrane protein assembly factor BamB	bamB ASJ32_01900	LIPO(Sec/SPII)	Unknown	M	Part of the outer membrane protein assembly complex, which is involved in assembly and insertion of beta-barrel proteins into the outer membrane	NaN	NaN	NaN	NaN	15.2783	15.5792	15.7551	16.3157	12.3666	12.6612	12.6393	13.2594	15.2783	15.5792	15.7551	16.3157				+	Ctrl_Extra_Fe_Extra	4.33846	0.000650526	-3.00044	-10.4166	45	45	45	72.6	72.6	72.6	42.446	0	323.31	10756000000	3843	A0A6N4CZ88	A0A6N4CZ88	2301
A0A6N4CNN8	OmpA-like domain-containing protein	ASJ32_08085	SP(Sec/SPI)	OuterMembrane	M	Belongs to the ompA family	16.7998	16.9572	17.1878	17.018	18.9652	19.6333	19.7536	20.1756	16.7998	16.9572	17.1878	17.018	18.9652	19.6333	19.7536	20.1756				+	Ctrl_Extra_Fe_Extra	4.24474	0.000741223	-2.64124	-10.0306	38	36	36	70.6	70.6	70.6	35.157	0	323.31	51250000000	7932	A0A6N4CNN8	A0A6N4CNN8	187
A0A6N4D0E4	DUF1566 domain-containing protein	ASJ32_02405 GO994_09745	SP(Sec/SPI)	Unknown	KLT	Protein of unknown function (DUF1566)	NaN	NaN	NaN	NaN	17.7024	17.8728	16.9828	17.5496	13.2868	14.2527	12.3302	13.0824	17.7024	17.8728	16.9828	17.5496				+	Ctrl_Extra_Fe_Extra	4.17178	0.000808389	-4.28889	-9.73907	16	16	16	67.6	67.6	67.6	20.462	0	323.31	964630000	416	A0A6N4D0E4	A0A6N4D0E4	2497
A0A6N4CW88	Putative histamine N-monooxygenase (Rhizobactin siderophore biosynthesis protein RhbE)	basC ASJ32_09660 GO994_22185	OTHER	Cytoplasmic	Q	l-lysine 6-monooxygenase	16.0297	15.8158	16.909	16.4369	20.3024	19.8346	19.0949	19.5501	16.0297	15.8158	16.909	16.4369	20.3024	19.8346	19.0949	19.5501				+	Ctrl_Extra_Fe_Extra	4.16664	0.000808389	-3.39763	-9.7188	40	40	40	62.7	62.7	62.7	49.683	0	323.31	10586000000	1935	A0A6N4CW88	A0A6N4CW88	1698
A0A6N4CZY7	Peptidase M13	ASJ32_01430	LIPO(Sec/SPII)	Unknown	O	peptidase, M13	15.508	15.0943	15.8332	15.1722	17.0139	17.414	17.6044	17.4634	15.508	15.0943	15.8332	15.1722	17.0139	17.414	17.6044	17.4634				+	Ctrl_Extra_Fe_Extra	4.06392	0.000916163	-1.972	-9.32196	75	75	75	73.8	73.8	73.8	75.317	0	323.31	11470000000	3781	A0A6N4CZY7	A0A6N4CZY7	2430
A0A6N4CP75	Porin OmpAI	ompAI ASJ32_08080 GO994_15245	SP(Sec/SPI)	OuterMembrane	M	Belongs to the ompA family	19.2267	19.5758	19.5737	19.4013	21.1996	21.8986	21.8043	22.3918	19.2267	19.5758	19.5737	19.4013	21.1996	21.8986	21.8043	22.3918				+	Ctrl_Extra_Fe_Extra	4.03311	0.000943104	-2.3792	-9.20576	45	45	43	85.8	85.8	85.8	35.807	0	323.31	141350000000	14460	A0A6N4CP75	A0A6N4CP75	240
A0A6N4D0J0	DJ-1 family protein (Oxidative-stress-resistance chaperone)	ASJ32_01045 GO994_06555	OTHER	Cytoplasmic	S	DJ-1/PfpI family	NaN	NaN	NaN	NaN	18.8113	21.875	20.393	18.9411	12.132	12.8524	13.6635	13.4575	18.8113	21.875	20.393	18.9411				+	Ctrl_Extra_Fe_Extra	3.90996	0.00115632	-6.97876	-8.75404	8	8	8	82.2	82.2	82.2	20.175	0	78.041	145710000	84	A0A6N4D0J0	A0A6N4D0J0	2508
A0A6N4CRB5	Chorismate synthase (CS) (EC 4.2.3.5) (5-enolpyruvylshikimate-3-phosphate phospholyase)	aroC ASJ32_13285 GO994_11400	OTHER	Cytoplasmic	E	Catalyzes the anti-1,4-elimination of the C-3 phosphate and the C-6 proR hydrogen from 5-enolpyruvylshikimate-3-phosphate (EPSP) to yield chorismate, which is the branch point compound that serves as the starting substrate for the three terminal pathways of aromatic amino acid biosynthesis. This reaction introduces a second double bond into the aromatic ring system	15.26	15.4718	15.8429	15.103	17.6361	18.4218	18.5923	17.5936	15.26	15.4718	15.8429	15.103	17.6361	18.4218	18.5923	17.5936				+	Ctrl_Extra_Fe_Extra	3.8808	0.00118707	-2.64151	-8.64993	36	36	36	80.9	80.9	80.9	39.048	0	323.31	8595800000	2428	A0A6N4CRB5	A0A6N4CRB5	614
A0A6N4CQ58	Major outer membrane lipoprotein Lpp	lpp ASJ32_07950 GO994_15940	LIPO(Sec/SPII)	OuterMembrane	M	Lipoprotein leucine-zipper	20.8715	20.5785	20.7411	20.5697	23.0757	24.9064	24.4144	24.7022	20.8715	20.5785	20.7411	20.5697	23.0757	24.9064	24.4144	24.7022				+	Ctrl_Extra_Fe_Extra	3.85696	0.00120841	-3.58446	-8.56565	12	12	12	56.2	56.2	56.2	8.5066	0	323.31	82472000000	9094	A0A6N4CQ58	A0A6N4CQ58	393
A0A6N4CZY8	Lipoprotein	metQ ASJ32_00210 GO994_17470	LIPO(Sec/SPII)	CytoplasmicMembrane	P	Belongs to the nlpA lipoprotein family	15.9727	15.8634	15.647	16.0262	18.9823	17.7927	18.5679	19.3176	15.9727	15.8634	15.647	16.0262	18.9823	17.7927	18.5679	19.3176				+	Ctrl_Extra_Fe_Extra	3.75593	0.00143252	-2.78776	-8.21629	38	38	38	74.1	74.1	74.1	28.506	0	323.31	58728000000	10902	A0A6N4CZY8	A0A6N4CZY8	2431
A0A6N4CST2	OmpA-like domain-containing protein	ASJ32_15490	LIPO(Sec/SPII)	CytoplasmicMembrane	M	Belongs to the ompA family	15.7058	15.6566	15.9082	15.4241	17.2622	18.0922	18.6008	18.3015	15.7058	15.6566	15.9082	15.4241	17.2622	18.0922	18.6008	18.3015				+	Ctrl_Extra_Fe_Extra	3.65253	0.00170484	-2.3905	-7.87149	22	22	22	71.6	71.6	71.6	21.991	0	323.31	17100000000	3955	A0A6N4CST2	A0A6N4CST2	915
A5I8G7	Heme utilization protein HutZ	hutZ ASJ32_00445	OTHER	Cytoplasmic	P	Pfam:Pyridox_oxidase	NaN	NaN	NaN	NaN	18.6384	16.8381	16.7547	17.7567	14.1116	12.9597	13.4353	12.7807	18.6384	16.8381	16.7547	17.7567				+	Ctrl_Extra_Fe_Extra	3.63846	0.00172731	-4.17514	-7.82552	32	32	32	96.2	96.2	96.2	20.843	0	323.31	9174300000	1036	A5I8G7	A5I8G7	2748
A5I8G1	Ligand-gated channel protein (Putative hemin receptor) (TonB-dependent hemoglobin/transferrin/lactoferrin family receptor)	hupA ASJ32_02385 GO994_09765	SP(Sec/SPI)	OuterMembrane	P	receptor	NaN	NaN	NaN	NaN	16.3146	17.4229	17.4902	17.3641	12.9921	14.4537	12.6587	13.4686	16.3146	17.4229	17.4902	17.3641				+	Ctrl_Extra_Fe_Extra	3.63755	0.00172731	-3.7547	-7.82255	66	66	65	77	77	77	80.389	0	323.31	3228500000	1147	A5I8G1	A5I8G1	2744
A0A6N4CZW9	Acetolactate synthase (EC 2.2.1.6)	ilvH ilvN ASJ32_00095 GO994_17585	OTHER	Cytoplasmic	E	Acetolactate synthase small	15.8524	16.6929	16.7164	17.0648	18.4573	19.0565	18.9291	19.145	15.8524	16.6929	16.7164	17.0648	18.4573	19.0565	18.9291	19.145				+	Ctrl_Extra_Fe_Extra	3.60855	0.00176542	-2.31538	-7.72859	29	29	29	97.6	97.6	97.6	18.109	0	323.31	6244200000	1396	A0A6N4CZW9	A0A6N4CZW9	2418
A0A6N4D0Q9	Protein HflC	hflC ASJ32_00280 GO994_17400	LIPO(Sec/SPII)	Cytoplasmic	O	HflC and HflK could regulate a protease	NaN	NaN	NaN	NaN	19.8241	16.2253	18.3427	18.7843	12.0305	11.3596	12.6107	12.4588	19.8241	16.2253	18.3427	18.7843				+	Ctrl_Extra_Fe_Extra	3.58779	0.00176542	-6.17919	-7.66189	72	72	72	88.1	88.1	88.1	33.251	0	323.31	46316000000	8489	A0A6N4D0Q9	A0A6N4D0Q9	2521
A0A6N4CUN8	Transcriptional regulator	ASJ32_01260	LIPO(Sec/SPII)	Periplasmic	S	Maltose operon periplasmic protein precursor (MalM)	15.312	15.6549	16.1433	16.4244	18.5328	20.3449	19.3849	19.1205	15.312	15.6549	16.1433	16.4244	18.5328	20.3449	19.3849	19.1205				+	Ctrl_Extra_Fe_Extra	3.5876	0.00176542	-3.46214	-7.66127	25	25	25	80.7	80.7	80.7	33.984	0	323.31	12276000000	2477	A0A6N4CUN8	A0A6N4CUN8	1356
A0A6N4CPP1	Outer membrane protein assembly factor BamD	bamD ASJ32_07510	LIPO(Sec/SPII)	Unknown	M	Part of the outer membrane protein assembly complex, which is involved in assembly and insertion of beta-barrel proteins into the outer membrane	15.3898	15.8442	15.9005	15.3294	17.5894	19.1134	18.8266	18.1842	15.3898	15.8442	15.9005	15.3294	17.5894	19.1134	18.8266	18.1842				+	Ctrl_Extra_Fe_Extra	3.55805	0.00185188	-2.81244	-7.56721	35	35	35	81.3	81.3	81.3	28.536	0	323.31	5634300000	1586	A0A6N4CPP1	A0A6N4CPP1	315
A0A6N4CXM0	DUF3466 family protein	ASJ32_12960 GO994_11460	SP(Sec/SPI)	Extracellular	S	Protein of unknown function (DUF3466)	18.0597	19.1294	18.3444	18.0194	20.6505	20.2416	20.6015	20.2258	18.0597	19.1294	18.3444	18.0194	20.6505	20.2416	20.6015	20.2258				+	Ctrl_Extra_Fe_Extra	3.45747	0.00221481	-2.04161	-7.25412	51	51	51	85.1	85.1	85.1	58.666	0	323.31	41334000000	9186	A0A6N4CXM0	A0A6N4CXM0	1977
A0A6N4CSA9	Phosphatidylcholine-sterol acyltransferase	ASJ32_16000	SP(Sec/SPI)	Extracellular	I	GDSL-like Lipase/Acylhydrolase	17.4112	16.7968	16.0229	15.9433	19.366	20.1694	19.6901	18.9932	17.4112	16.7968	16.0229	15.9433	19.366	20.1694	19.6901	18.9932				+	Ctrl_Extra_Fe_Extra	3.38655	0.00248045	-3.01111	-7.03987	21	21	21	64.2	64.2	64.2	37.399	0	277.71	310770000	381	A0A6N4CSA9	A0A6N4CSA9	813
A0A6N4CV55	TIGR04219 family outer membrane beta-barrel protein	ASJ32_15825 GO994_18730	SP(Sec/SPI)	Unknown	M	Has lipid A 3-O-deacylase activity. Hydrolyzes the ester bond at the 3 position of lipid A, a bioactive component of lipopolysaccharide (LPS), thereby releasing the primary fatty acyl moiety	17.677	17.9286	17.9968	17.9833	19.6617	21.4625	20.438	20.9001	17.677	17.9286	17.9968	17.9833	19.6617	21.4625	20.438	20.9001				+	Ctrl_Extra_Fe_Extra	3.37602	0.00252084	-2.71915	-7.0085	26	26	26	65.1	65.1	65.1	23.121	0	323.31	39528000000	5366	A0A6N4CV55	A0A6N4CV55	1454
A0A6N4CYU6	Uncharacterized protein	ASJ32_01775 GO994_13675	LIPO(Sec/SPII)	Unknown	/	/	21.8962	21.4124	21.6141	21.5214	22.7271	23.7272	23.0194	23.4768	21.8962	21.4124	21.6141	21.5214	22.7271	23.7272	23.0194	23.4768				+	Ctrl_Extra_Fe_Extra	3.22722	0.00321452	-1.62662	-6.57709	40	40	40	88.3	88.3	88.3	34.438	0	323.31	5155200000	3096	A0A6N4CYU6	A0A6N4CYU6	2223
A0A6N4CND1	Cytochrome C	ASJ32_04375	SP(Sec/SPI)	Periplasmic	E	Bacterial extracellular solute-binding proteins, family 5 Middle	22.9155	23.6134	23.4311	23.1748	24.4715	24.7079	24.9435	24.3378	22.9155	23.6134	23.4311	23.1748	24.4715	24.7079	24.9435	24.3378				+	Ctrl_Extra_Fe_Extra	3.22715	0.00321452	-1.3315	-6.5769	72	72	72	89.2	89.2	89.2	57.296	0	323.31	30549000000	8626	A0A6N4CND1	A0A6N4CND1	165
Q6RBX7	Colicin receptor (TonB-dependent receptor)	fstC ASJ32_11140	SP(Sec/SPI)	OuterMembrane	P	Receptor	16.8772	16.9194	18.2368	17.7231	19.3683	19.7035	19.4874	19.7345	16.8772	16.9194	18.2368	17.7231	19.3683	19.7035	19.4874	19.7345				+	Ctrl_Extra_Fe_Extra	3.11263	0.00379645	-2.13429	-6.25943	87	87	87	83.6	83.6	83.6	71.655	0	323.31	65832000000	13376	Q6RBX7	Q6RBX7	2838
A0A1Q4MD13	Hydrolase	ASJ32_21770	OTHER	CytoplasmicMembrane	S	Domain of unknown function (DUF1705)	NaN	NaN	NaN	NaN	14.2378	NaN	14.8831	15.1085	12.7774	11.8451	12.6572	12.5571	14.2378	13.9927	14.8831	15.1085				+	Ctrl_Extra_Fe_Extra	3.10238	0.0038114	-2.0963	-6.2316	58	58	44	56.6	56.6	54.3	61.646	0	323.31	26940000000	6573	A0A1Q4MD13	A0A1Q4MD13	25
A0A6N4CVC9	Peptide ABC transporter substrate-binding protein	ASJ32_16905	SP(Sec/SPI)	Periplasmic	E	Bacterial extracellular solute-binding proteins, family 5 Middle	17.4197	18.0479	18.5296	18.5	20.0335	19.9316	21.0862	20.219	17.4197	18.0479	18.5296	18.5	20.0335	19.9316	21.0862	20.219				+	Ctrl_Extra_Fe_Extra	2.99152	0.00453626	-2.19324	-5.93663	42	42	42	77.3	77.3	77.3	59.995	0	323.31	1357200000	938	A0A6N4CVC9	A0A6N4CVC9	1503
A0A6N4CXR7	Methionine aminopeptidase (MAP) (MetAP) (EC 3.4.11.18) (Peptidase M)	map ASJ32_01285 GO994_06795	OTHER	Cytoplasmic	E	Methionine aminopeptidase	16.7414	16.1405	17.1052	17.3795	18.4955	18.3597	18.638	18.2966	16.7414	16.1405	17.1052	17.3795	18.4955	18.3597	18.638	18.2966				+	Ctrl_Extra_Fe_Extra	2.92691	0.00484723	-1.60579	-5.76964	22	22	22	96.2	96.2	96.2	29.087	0	323.31	3828600000	925	A0A6N4CXR7	A0A6N4CXR7	2006
A0A6N4CS28	Secretin	ASJ32_19905	LIPO(Sec/SPII)	OuterMembrane	NU	Bacterial type II and III secretion system protein	14.7856	13.6007	14.8779	14.9351	16.5212	16.2281	16.6216	16.3751	14.7856	13.6007	14.8779	14.9351	16.5212	16.2281	16.6216	16.3751				+	Ctrl_Extra_Fe_Extra	2.91129	0.0049531	-1.88666	-5.72981	65	65	65	70.7	70.7	70.7	77.742	0	323.31	18899000000	5226	A0A6N4CS28	A0A6N4CS28	759
A0A6N4CVH6	Divisome-associated lipoprotein YraP	yraP ASJ32_16495 GO994_02075	LIPO(Sec/SPII)	Periplasmic	S	BON domain	15.4272	15.1031	15.2425	14.9334	16.0854	17.3872	17.0908	17.2516	15.4272	15.1031	15.2425	14.9334	16.0854	17.3872	17.0908	17.2516				+	Ctrl_Extra_Fe_Extra	2.88566	0.00509644	-1.77719	-5.66487	28	28	28	80.2	80.2	80.2	20.439	0	323.31	6300100000	1602	A0A6N4CVH6	A0A6N4CVH6	1533
A0A6N4CZW4	Maltoporin (Maltose-inducible porin)	lamB ASJ32_01255	SP(Sec/SPI)	OuterMembrane	M	involved in the transport of maltose and maltodextrins	16.0903	16.2571	15.8763	15.7799	17.6262	18.5854	17.7961	19.3642	16.0903	16.2571	15.8763	15.7799	17.6262	18.5854	17.7961	19.3642				+	Ctrl_Extra_Fe_Extra	2.88497	0.00509644	-2.34208	-5.66311	47	47	47	78	78	78	48.899	0	323.31	16444000000	11466	A0A6N4CZW4	A0A6N4CZW4	2416
A0A6N4CTE3	Sec translocon accessory complex subunit YajC	yajC ASJ32_02030 GO994_10140	OTHER	CytoplasmicMembrane	U	Preprotein translocase	NaN	NaN	NaN	NaN	18.0283	15.9423	18.5916	18.5848	12.7775	13.5044	12.5453	14.656	18.0283	15.9423	18.5916	18.5848				+	Ctrl_Extra_Fe_Extra	2.86195	0.00531792	-4.41594	-5.60525	17	17	17	92.8	92.8	92.8	11.911	0	285.76	5837900000	1956	A0A6N4CTE3	A0A6N4CTE3	1064
A0A6N4CU44	Uncharacterized protein	ASJ32_00170	SP(Sec/SPI)	OuterMembrane	S	Protein of unknown function (DUF2860)	15.5203	16.1757	16.2339	15.8877	17.2467	19.166	18.852	18.6581	15.5203	16.1757	16.2339	15.8877	17.2467	19.166	18.852	18.6581				+	Ctrl_Extra_Fe_Extra	2.84192	0.00552779	-2.52629	-5.55528	30	30	30	79.5	79.5	79.5	36.739	0	323.31	10268000000	2618	A0A6N4CU44	A0A6N4CU44	1226
A0A6P1H8D1	3-hydroxyacyl-[acyl-carrier-protein] dehydratase FabZ (EC 4.2.1.59) ((3R)-hydroxymyristoyl-[acyl-carrier-protein] dehydratase) ((3R)-hydroxymyristoyl-ACP dehydrase) (Beta-hydroxyacyl-ACP dehydratase)	fabZ ASJ32_01345 GO994_06855	OTHER	Cytoplasmic	I	Involved in unsaturated fatty acids biosynthesis. Catalyzes the dehydration of short chain beta-hydroxyacyl-ACPs and long chain saturated and unsaturated beta-hydroxyacyl-ACPs	16.2402	16.665	14.7774	16.9918	19.204	19.0794	20.2523	18.8999	16.2402	16.665	14.7774	16.9918	19.204	19.0794	20.2523	18.8999				+	Ctrl_Extra_Fe_Extra	2.83687	0.00552779	-3.19032	-5.54271	17	17	17	74.5	74.5	74.5	17.167	0	323.31	615170000	543	A0A6P1H8D1	A0A6P1H8D1	2653
A0A6N4CZW1	Channel protein TolC (TolC family outer membrane protein)	ASJ32_10305 GO994_08170	SP(Sec/SPI)	OuterMembrane	MU	type I secretion outer membrane protein, TolC	18.3051	18.3567	18.6867	18.1804	19.8045	21.66	20.384	21.3223	18.3051	18.3567	18.6867	18.1804	19.8045	21.66	20.384	21.3223				+	Ctrl_Extra_Fe_Extra	2.81417	0.00558707	-2.41044	-5.48655	96	96	96	91.4	91.4	91.4	49.03	0	323.31	206730000000	30657	A0A6N4CZW1	A0A6N4CZW1	2415
A0A6P1HB85	tRNA U34 carboxymethyltransferase (EC 2.5.1.-)	cmoB ASJ32_21060 GO994_14305	OTHER	Cytoplasmic	J	Catalyzes carboxymethyl transfer from carboxy-S- adenosyl-L-methionine (Cx-SAM) to 5-hydroxyuridine (ho5U) to form 5-carboxymethoxyuridine (cmo5U) at position 34 in tRNAs	14.5383	15.0114	15.5902	14.3524	17.1027	17.9037	19.8153	18.5087	14.5383	15.0114	15.5902	14.3524	17.1027	17.9037	19.8153	18.5087				+	Ctrl_Extra_Fe_Extra	2.79761	0.00577598	-3.45953	-5.44581	27	27	27	74.5	74.5	74.5	37.121	0	323.31	729670000	503	A0A6P1HB85	A0A6P1HB85	2697
A0A6N4CRE6	Ligand-gated channel protein (TonB-dependent siderophore receptor)	ASJ32_06815 GO994_12210	SP(Sec/SPI)	OuterMembrane	P	Receptor	NaN	NaN	NaN	NaN	14.4462	15.8076	15.174	15.2857	12.8154	13.3146	13.8094	13.3353	14.4462	15.8076	15.174	15.2857				+	Ctrl_Extra_Fe_Extra	2.76741	0.00604449	-1.85971	-5.37209	61	61	61	78.1	78.1	78.1	78.762	0	323.31	2558000000	1277	A0A6N4CRE6	A0A6N4CRE6	634
A0A6N4CYE9	Uncharacterized protein	ASJ32_10065 GO994_08440	LIPO(Sec/SPII)	CytoplasmicMembrane	-	-	15.8182	16.0344	16.7025	16.3075	18.3992	18.3285	20.2737	18.5532	15.8182	16.0344	16.7025	16.3075	18.3992	18.3285	20.2737	18.5532				+	Ctrl_Extra_Fe_Extra	2.74914	0.00624479	-2.67298	-5.32783	15	15	15	51.2	51.2	51.2	33.28	0	101.01	321140000	339	A0A6N4CYE9	A0A6N4CYE9	2142
A0A6N4CXS4	Inosine-5'-monophosphate dehydrogenase (IMP dehydrogenase) (IMPD) (IMPDH) (EC 1.1.1.205)	guaB ASJ32_11050	OTHER	Cytoplasmic	F	Catalyzes the conversion of inosine 5'-phosphate (IMP) to xanthosine 5'-phosphate (XMP), the first committed and rate- limiting step in the de novo synthesis of guanine nucleotides, and therefore plays an important role in the regulation of cell growth	17.3487	16.9824	17.5348	17.0426	18.1806	18.513	19.233	18.4411	17.3487	16.9824	17.5348	17.0426	18.1806	18.513	19.233	18.4411				+	Ctrl_Extra_Fe_Extra	2.71467	0.00660481	-1.36483	-5.24504	69	69	69	97.5	97.5	97.5	51.631	0	323.31	53080000000	11388	A0A6N4CXS4	A0A6N4CXS4	2011
A0A6N4CUB6	Uncharacterized protein	ASJ32_05025 GO994_04445	LIPO(Sec/SPII)	Unknown	O	Heat shock protein	NaN	15.0272	NaN	NaN	16.0692	19.2098	17.9365	18.3755	13.5032	15.0272	13.4767	13.1916	16.0692	19.2098	17.9365	18.3755				+	Ctrl_Extra_Fe_Extra	2.70902	0.00660853	-4.09805	-5.23155	11	11	11	99.2	99.2	99.2	14.454	0	323.31	2624800000	713	A0A6N4CUB6	A0A6N4CUB6	1274
A0A6N4D018	Porin	ASJ32_00865	SP(Sec/SPI)	Unknown	S	Outer membrane porin	NaN	NaN	NaN	NaN	14.1139	14.7043	15.0292	15.3926	13.2268	13.5813	13.0817	12.8643	14.1139	14.7043	15.0292	15.3926				+	Ctrl_Extra_Fe_Extra	2.70649	0.00660853	-1.6215	-5.22553	28	28	28	56.1	56.1	56.1	52.427	0	323.31	1530600000	1219	A0A6N4D018	A0A6N4D018	2445
A0A6N4CUS4	Outer membrane channel protein (Outer membrane channel protein TolC)	tolC ASJ32_15930 GO994_19545	SP(Sec/SPI)	OuterMembrane	MU	Outer membrane efflux protein	15.8285	15.3639	15.7529	15.1488	17.2013	16.7872	17.966	18.4338	15.8285	15.3639	15.7529	15.1488	17.2013	16.7872	17.966	18.4338				+	Ctrl_Extra_Fe_Extra	2.66639	0.0070874	-2.07355	-5.13058	69	69	69	92.5	92.5	92.5	48.895	0	323.31	29151000000	8006	A0A6N4CUS4	A0A6N4CUS4	1381
A0A6N4CSF1	OMP_b-brl domain-containing protein	ASJ32_18885	LIPO(Sec/SPII)	Unknown	M	OmpA-like transmembrane domain	15.8502	16.1929	16.5982	16.5285	17.5121	19.4627	19.4238	18.6969	15.8502	16.1929	16.5982	16.5285	17.5121	19.4627	19.4238	18.6969				+	Ctrl_Extra_Fe_Extra	2.65	0.00726365	-2.48141	-5.0921	11	11	11	43.8	43.8	43.8	22.665	0	323.31	3655200000	1683	A0A6N4CSF1	A0A6N4CSF1	836
A0A6N4CVX1	Type IV-A pilus assembly ATPase PilB	ASJ32_15035	OTHER	Cytoplasmic	NU	pilus assembly	NaN	NaN	NaN	NaN	16.7693	16.4618	NaN	16.6665	12.7639	12.9208	12.0956	12.6141	16.7693	16.4618	14.043	16.6665				+	Ctrl_Extra_Fe_Extra	2.61876	0.00753946	-3.38655	-5.01932	13	11	11	26.1	22.7	22.7	62.576	0.00043215	24.736	91848000	44	A0A6N4CVX1	A0A6N4CVX1	1624
A0A6N4CTB7	Uncharacterized protein	ASJ32_05940 ASJ32_12025	OTHER	Unknown	-	-	17.2438	16.6911	18.102	17.2219	19.2954	19.4402	21.3797	19.9293	17.2438	16.6911	18.102	17.2219	19.2954	19.4402	21.3797	19.9293				+	Ctrl_Extra_Fe_Extra	2.536	0.00882686	-2.69643	-4.82984	18	18	18	68.3	68.3	68.3	19.543	0	323.31	492430000	841	A0A6N4CTB7	A0A6N4CTB7	1044
A0A6N4CLF6	Putrescine-binding periplasmic protein	ASJ32_07840 GO994_20800	SP(Sec/SPI)	Periplasmic	P	Required for the activity of the bacterial periplasmic transport system of putrescine	22.8904	22.3647	22.8459	22.3224	23.6419	24.4488	23.5845	24.5838	22.8904	22.3647	22.8459	22.3224	23.6419	24.4488	23.5845	24.5838				+	Ctrl_Extra_Fe_Extra	2.52759	0.00889094	-1.45892	-4.81086	32	32	32	72.9	72.9	72.9	40.033	0	323.31	10283000000	2680	A0A6N4CLF6	A0A6N4CLF6	62
A0A6N4CVD7	Uncharacterized protein	ASJ32_11210	SP(Sec/SPI)	Unknown	O	Highly conserved protein containing a thioredoxin domain	18.9988	19.7985	19.8967	19.8016	20.3809	20.8826	21.0007	20.7902	18.9988	19.7985	19.8967	19.8016	20.3809	20.8826	21.0007	20.7902				+	Ctrl_Extra_Fe_Extra	2.42123	0.0106296	-1.1397	-4.57482	44	44	44	55.6	55.6	55.6	70.602	0	323.31	3930600000	1957	A0A6N4CVD7	A0A6N4CVD7	1505
A0A6N4CNU1	Phage tail protein	ASJ32_08545	OTHER	Unknown	S	Protein of unknown function (DUF2597)	21.274	20.3556	21.5739	21.1968	22.4943	22.0433	22.8625	22.9725	21.274	20.3556	21.5739	21.1968	22.4943	22.0433	22.8625	22.9725				+	Ctrl_Extra_Fe_Extra	2.36664	0.0117863	-1.49306	-4.45654	24	24	24	98	98	98	16.318	0	323.31	18811000000	6753	A0A6N4CNU1	A0A6N4CNU1	202
A0A6N4CTS9	Porin	ASJ32_19790 GO994_04135	SP(Sec/SPI)	OuterMembrane	M	Belongs to the Gram-negative porin family	20.3766	20.5928	20.6049	19.7804	21.352	21.5777	21.1321	21.1615	20.3766	20.5928	20.6049	19.7804	21.352	21.5777	21.1321	21.1615				+	Ctrl_Extra_Fe_Extra	2.34755	0.0121369	-0.967156	-4.41561	41	41	41	71.7	71.7	71.7	39.186	0	323.31	459530000000	38783	A0A6N4CTS9	A0A6N4CTS9	1159
Q7WYM8	Superoxide dismutase (EC 1.15.1.1)	sodA ASJ32_05385 GO994_19475	OTHER	Unknown	C	Destroys radicals which are normally produced within the cells and which are toxic to biological systems	15.1264	17.2567	16.6851	17.338	20.8674	19.3015	18.9671	19.1483	15.1264	17.2567	16.6851	17.338	20.8674	19.3015	18.9671	19.1483				+	Ctrl_Extra_Fe_Extra	2.34294	0.0121557	-2.96949	-4.40576	17	17	17	96.1	96.1	96.1	22.906	0	323.31	3001300000	224	Q7WYM8	Q7WYM8	2840
A0A6N4CUW7	Uncharacterized protein	ASJ32_05030 GO994_04440	LIPO(Sec/SPII)	Unknown	-	-	17.2364	17.8343	18.3365	17.3318	19.4201	20.7357	18.8819	20.326	17.2364	17.8343	18.3365	17.3318	19.4201	20.7357	18.8819	20.326				+	Ctrl_Extra_Fe_Extra	2.33179	0.0123675	-2.15616	-4.382	11	11	11	66.5	66.5	66.5	17.484	0	323.31	7578600000	3130	A0A6N4CUW7	A0A6N4CUW7	1408
A0A6N4CSM1	Uncharacterized protein	ASJ32_19710 GO994_04050	SP(Sec/SPI)	Unknown	C	electron transfer activity	16.1335	16.3457	17.2414	16.5402	18.3422	19.715	17.7636	19.3143	16.1335	16.3457	17.2414	16.5402	18.3422	19.715	17.7636	19.3143				+	Ctrl_Extra_Fe_Extra	2.33155	0.0123675	-2.21861	-4.38149	23	23	23	70.2	70.2	70.2	13.887	0	323.31	3688300000	965	A0A6N4CSM1	A0A6N4CSM1	878
A0A6N4D005	DNA topoisomerase 1 (EC 5.6.2.1) (DNA topoisomerase I)	topA ASJ32_01535	OTHER	Cytoplasmic	L	Releases the supercoiling and torsional tension of DNA, which is introduced during the DNA replication and transcription, by transiently cleaving and rejoining one strand of the DNA duplex. Introduces a single-strand break via transesterification at a target site in duplex DNA. The scissile phosphodiester is attacked by the catalytic tyrosine of the enzyme, resulting in the formation of a DNA-(5'…	14.7806	14.6555	15.6246	14.7446	16.3851	15.6643	16.2429	16.2657	14.7806	14.6555	15.6246	14.7446	16.3851	15.6643	16.2429	16.2657				+	Ctrl_Extra_Fe_Extra	2.28295	0.0135893	-1.18823	-4.27878	128	128	128	93.7	93.7	93.7	96.99	0	323.31	22172000000	7436	A0A6N4D005	A0A6N4D005	2438
A0A6N4CSH0	Flavin prenyltransferase UbiX (EC 2.5.1.129)	ubiX ASJ32_18560 GO994_17840	OTHER	Cytoplasmic	H	Flavin prenyltransferase that catalyzes the synthesis of the prenylated FMN cofactor (prenyl-FMN) for 4-hydroxy-3- polyprenylbenzoic acid decarboxylase UbiD. The prenyltransferase is metal-independent and links a dimethylallyl moiety from dimethylallyl monophosphate (DMAP) to the flavin N5 and C6 atoms of FMN	14.9522	15.758	15.7032	15.2125	16.1095	16.4671	16.6895	16.2958	14.9522	15.758	15.7032	15.2125	16.1095	16.4671	16.6895	16.2958				+	Ctrl_Extra_Fe_Extra	2.27632	0.0137012	-0.984021	-4.26488	21	21	21	94.1	94.1	94.1	22.058	0	323.31	875160000	829	A0A6N4CSH0	A0A6N4CSH0	846
A5I8G8	Heme utilization protein HutX (HuvX protein)	hutX ASJ32_00440	OTHER	Cytoplasmic	P	Haem utilisation ChuX/HutX	NaN	NaN	NaN	NaN	17.7099	15.4707	NaN	17.392	14.1667	13.9723	12.1518	12.8448	17.7099	15.4707	15.4019	17.392				+	Ctrl_Extra_Fe_Extra	2.21072	0.0157715	-3.20973	-4.12873	18	18	18	93.5	93.5	93.5	19.096	0	175.61	3930800000	415	A5I8G8	A5I8G8	2749
A0A6N4CU59	Peptide ABC transporter substrate-binding protein	ASJ32_04880	SP(Sec/SPI)	Periplasmic	E	Bacterial extracellular solute-binding proteins, family 5 Middle	16.4289	15.5858	17.1188	15.744	17.8023	17.5315	18.6167	17.7718	16.4289	15.5858	17.1188	15.744	17.8023	17.5315	18.6167	17.7718				+	Ctrl_Extra_Fe_Extra	2.16782	0.017056	-1.7112	-4.04102	34	34	34	59.3	59.3	59.3	68.819	0	241.88	622420000	435	A0A6N4CU59	A0A6N4CU59	1235
A0A6N4CQR8	Tol-Pal system protein TolB	tolB ASJ32_04145	SP(Sec/SPI)	Periplasmic	U	Involved in the TonB-independent uptake of proteins	17.1206	17.2244	17.6681	17.465	17.9869	19.0601	18.4083	19.336	17.1206	17.2244	17.6681	17.465	17.9869	19.0601	18.4083	19.336				+	Ctrl_Extra_Fe_Extra	2.15832	0.0173162	-1.32831	-4.02174	51	51	51	70.5	70.5	70.5	48.181	0	323.31	15002000000	6225	A0A6N4CQR8	A0A6N4CQR8	503
A0A6N4CXG0	Slp/YeaY family lipoprotein	ASJ32_12600 GO994_11850	LIPO(Sec/SPII)	Unknown	M	outer membrane lipoprotein Slp	NaN	NaN	NaN	NaN	14.1673	16.4777	16.3824	16.2923	12.9246	13.244	12.6591	14.3051	14.1673	16.4777	16.3824	16.2923				+	Ctrl_Extra_Fe_Extra	2.06963	0.0200934	-2.54674	-3.84405	11	11	11	64.6	64.6	64.6	19.626	0	309.7	477110000	324	A0A6N4CXG0	A0A6N4CXG0	1946
A0A6N4D067	Aspartate aminotransferase	ASJ32_01505	OTHER	Cytoplasmic	E	Aminotransferase class I and II	16.7149	17.1361	17.3071	17.6906	18.76	18.5671	18.5858	17.6845	16.7149	17.1361	17.3071	17.6906	18.76	18.5671	18.5858	17.6845				+	Ctrl_Extra_Fe_Extra	2.02792	0.021638	-1.18715	-3.76191	31	31	31	67.5	67.5	67.5	41.964	0	323.31	3294500000	1006	A0A6N4D067	A0A6N4D067	2464
A0A6N4D092	Protein HflK	hflK ASJ32_00275 GO994_17405	OTHER	Unknown	O	HflC and HflK could encode or regulate a protease	14.9753	NaN	13.6721	NaN	19.6238	15.2283	17.276	18.8138	14.9753	13.4561	13.6721	12.4693	19.6238	15.2283	17.276	18.8138				+	Ctrl_Extra_Fe_Extra	2.01359	0.0222024	-4.09229	-3.7339	62	62	62	91.4	91.4	91.4	42.48	0	323.31	70329000000	8451	A0A6N4D092	A0A6N4D092	2476
A0A6N4CUJ3	Uncharacterized protein	ASJ32_01060 GO994_06570	SP(Sec/SPI)	OuterMembrane	M	Nucleoside-specific channel-forming protein, Tsx	18.2295	18.3424	18.1808	18.2747	18.948	20.5218	19.2834	20.591	18.2295	18.3424	18.1808	18.2747	18.948	20.5218	19.2834	20.591				+	Ctrl_Extra_Fe_Extra	2.01271	0.0222024	-1.5792	-3.73218	11	11	11	44	44	44	31.115	0	323.31	14926000000	2114	A0A6N4CUJ3	A0A6N4CUJ3	1322
A0A6N4D0H8	Autotransporter	ASJ32_00930 GO994_06435	SP(Sec/SPI)	OuterMembrane	-	-	NaN	NaN	NaN	NaN	14.374	16.6558	15.1121	15.2402	13.9181	13.5989	13.0002	13.1386	14.374	16.6558	15.1121	15.2402				+	Ctrl_Extra_Fe_Extra	1.99867	0.0226531	-1.93153	-3.70483	21	21	21	67.5	67.5	67.5	22.62	0	323.31	2205000000	1248	A0A6N4D0H8	A0A6N4D0H8	2507
A0A6N4CS83	META domain-containing protein	ASJ32_19305	LIPO(Sec/SPII)	Unknown	O	response to heat	NaN	16.3102	15.9772	NaN	17.8073	20.5233	18.1868	18.7938	12.1211	16.3102	15.9772	12.7675	17.8073	20.5233	18.1868	18.7938				+	Ctrl_Extra_Fe_Extra	1.98253	0.0232071	-4.53381	-3.67352	13	13	13	59.1	59.1	59.1	13.65	0	323.31	5657800000	3726	A0A6N4CS83	A0A6N4CS83	793
A0A6N4CWG7	Porin	ASJ32_12135 GO994_14700	SP(Sec/SPI)	OuterMembrane	M	Belongs to the Gram-negative porin family	21.5267	21.9585	21.9317	21.57	22.2424	23.6413	22.8635	23.7954	21.5267	21.9585	21.9317	21.57	22.2424	23.6413	22.8635	23.7954				+	Ctrl_Extra_Fe_Extra	1.97911	0.0232071	-1.38891	-3.6669	43	43	43	85.8	85.8	85.8	38.455	0	323.31	228990000000	42250	A0A6N4CWG7	A0A6N4CWG7	1740
A0A6N4D0X2	Na(+)-translocating NADH-quinone reductase subunit A (Na(+)-NQR subunit A) (Na(+)-translocating NQR subunit A) (EC 7.2.1.1) (NQR complex subunit A) (NQR-1 subunit A)	nqrA ASJ32_01100	OTHER	Cytoplasmic	C	NQR complex catalyzes the reduction of ubiquinone-1 to ubiquinol by two successive reactions, coupled with the transport of Na( ) ions from the cytoplasm to the periplasm. NqrA to NqrE are probably involved in the second step, the conversion of ubisemiquinone to ubiquinol	NaN	NaN	NaN	NaN	16.3339	NaN	16.561	16.5567	12.9263	12.9921	13.0563	13.0522	16.3339	13.5089	16.561	16.5567				+	Ctrl_Extra_Fe_Extra	1.97703	0.0232452	-2.73342	-3.66288	58	58	58	94.6	94.6	94.6	48.791	0	323.31	24478000000	4490	A0A6N4D0X2	A0A6N4D0X2	2533
A0A6N4CZK7	Outer membrane protein assembly factor BamC	bamC ASJ32_00135	LIPO(Sec/SPII)	OuterMembrane	M	Part of the outer membrane protein assembly complex, which is involved in assembly and insertion of beta-barrel proteins into the outer membrane	15.26	15.5643	15.0084	16.1687	16.6213	16.9037	18.3291	16.8387	15.26	15.5643	15.0084	16.1687	16.6213	16.9037	18.3291	16.8387				+	Ctrl_Extra_Fe_Extra	1.94997	0.0239576	-1.67288	-3.61073	32	32	32	79.7	79.7	79.7	40.513	0	323.31	25657000000	4443	A0A6N4CZK7	A0A6N4CZK7	2362
A0A6N4CQS5	ATP-dependent protease subunit HslV (EC 3.4.25.2)	hslV ASJ32_07715 GO994_20920	OTHER	Cytoplasmic	O	Protease subunit of a proteasome-like degradation complex believed to be a general protein degrading machinery	19.2309	19.5281	18.8349	18.9247	20.1802	19.5641	20.2568	19.7458	19.2309	19.5281	18.8349	18.9247	20.1802	19.5641	20.2568	19.7458				+	Ctrl_Extra_Fe_Extra	1.89643	0.0259805	-0.807095	-3.5086	19	19	19	68.9	68.9	68.9	18.9	0	323.31	7315500000	1692	A0A6N4CQS5	A0A6N4CQS5	508
A0A6N4D0S7	Chitinase	ASJ32_00505	SP(Sec/SPI)	Unknown	MU	protein contain chitin-binding domain type 3	17.1188	16.7601	16.1032	15.9332	18.3321	18.0824	17.7227	17.0761	17.1188	16.7601	16.1032	15.9332	18.3321	18.0824	17.7227	17.0761				+	Ctrl_Extra_Fe_Extra	1.83914	0.0288495	-1.32448	-3.40073	17	17	17	28.8	28.8	28.8	67.999	0	94.526	47410000	89	A0A6N4D0S7	A0A6N4D0S7	2529
A0A6N4CVR6	Long-chain fatty acid outer membrane transporter	ASJ32_14520	SP(Sec/SPI)	OuterMembrane	I	Long-chain fatty acid	17.53	17.9796	17.6543	17.6428	18.4085	21.3359	19.2339	20.5068	17.53	17.9796	17.6543	17.6428	18.4085	21.3359	19.2339	20.5068				+	Ctrl_Extra_Fe_Extra	1.78145	0.0317564	-2.16961	-3.29353	31	31	31	68.5	68.5	68.5	46.374	0	323.31	19799000000	6689	A0A6N4CVR6	A0A6N4CVR6	1589
A0A6N4CZ79	DUF533 domain-containing protein	ASJ32_02530 GO994_09605	OTHER	CytoplasmicMembrane	S	Protein of unknown function (DUF533)	NaN	NaN	NaN	NaN	NaN	15.3531	15.7401	16.4195	13.6212	13.7903	13.0649	14.2148	14.1256	15.3531	15.7401	16.4195				+	Ctrl_Extra_Fe_Extra	1.74909	0.0336051	-1.73675	-3.23402	28	28	28	94	94	94	23.168	0	323.31	7457500000	1926	A0A6N4CZ79	A0A6N4CZ79	2296
A0A6N4CLY4	Uncharacterized protein	ASJ32_06075	OTHER	Unknown	-	-	NaN	NaN	NaN	NaN	15.3057	15.1303	NaN	16.4985	13.0718	12.4953	13.4714	12.2328	15.3057	15.1303	13.3747	16.4985				+	Ctrl_Extra_Fe_Extra	1.74095	0.0339816	-2.25948	-3.21913	9	9	9	53.3	53.3	53.3	11.4	0	94.294	386940000	172	A0A6N4CLY4	A0A6N4CLY4	82
A0A6N4CZX6	Oligopeptide ABC transporter substrate-binding protein OppA (Peptide ABC transporter substrate-binding protein)	ASJ32_10165 GO994_08325	SP(Sec/SPI)	Periplasmic	E	Bacterial extracellular solute-binding proteins, family 5 Middle	20.8925	22.1493	21.1467	21.5812	22.2637	23.546	23.2733	22.2152	20.8925	22.1493	21.1467	21.5812	22.2637	23.546	23.2733	22.2152				+	Ctrl_Extra_Fe_Extra	1.70063	0.0367332	-1.3821	-3.14567	90	90	90	91.1	91.1	91.1	60.697	0	323.31	16645000000	5347	A0A6N4CZX6	A0A6N4CZX6	2421
A0A6N4D0H7	GTP cyclohydrolase 1 (EC 3.5.4.16) (GTP cyclohydrolase I) (GTP-CH-I)	folE ASJ32_02665 GO994_09470	OTHER	Cytoplasmic	H	GTP cyclohydrolase	16.1111	16.278	15.8621	16.319	17.1404	17.533	17.403	16.2559	16.1111	16.278	15.8621	16.319	17.1404	17.533	17.403	16.2559				+	Ctrl_Extra_Fe_Extra	1.66247	0.0396151	-0.940546	-3.07674	24	24	24	76.1	76.1	76.1	24.064	0	323.31	2298600000	1170	A0A6N4D0H7	A0A6N4D0H7	2506
A0A6N4CV11	Acetyltransferase component of pyruvate dehydrogenase complex (EC 2.3.1.12)	aceF ASJ32_15005	OTHER	Cytoplasmic	C	The pyruvate dehydrogenase complex catalyzes the overall conversion of pyruvate to acetyl-CoA and CO(2)	15.2388	15.1373	16.7012	14.8915	16.932	16.217	17.6126	17.5985	15.2388	15.1373	16.7012	14.8915	16.932	16.217	17.6126	17.5985				+	Ctrl_Extra_Fe_Extra	1.63787	0.0414159	-1.59785	-3.03259	69	69	69	69.2	69.2	69.2	64.926	0	323.31	51062000000	9748	A0A6N4CV11	A0A6N4CV11	1429
A0A6N4CW79	Ribonuclease	ASJ32_15905	SP(Sec/SPI)	Periplasmic	J	Belongs to the RNase T2 family	NaN	NaN	NaN	NaN	15.3764	14.4192	NaN	14.6949	13.7722	12.3316	12.9819	13.0714	15.3764	14.4192	13.4548	14.6949				+	Ctrl_Extra_Fe_Extra	1.57473	0.0467648	-1.44706	-2.92021	18	18	18	69.4	69.4	69.4	24.46	0	323.31	433440000	382	A0A6N4CW79	A0A6N4CW79	1690
A0A6N4CYF5	Uncharacterized protein	ASJ32_10275	SP(Sec/SPI)	Periplasmic	S	Protein of unknown function (DUF541)	14.9372	14.5916	14.9554	15.6593	16.7492	15.3696	16.8037	15.9276	14.9372	14.5916	14.9554	15.6593	16.7492	15.3696	16.8037	15.9276				+	Ctrl_Extra_Fe_Extra	1.54044	0.0494377	-1.17667	-2.85975	23	23	23	62.8	62.8	62.8	25.706	0	323.31	3163600000	1125	A0A6N4CYF5	A0A6N4CYF5	2147
A0A6N4CWG8	N-acetylglucosamine-binding protein A	ASJ32_03440	SP(Sec/SPI)	Extracellular	E	Probably interacts with GlcNAc residues. May promote attachment to both epithelial cell surfaces and chitin	22.3632	22.4106	22.0228	21.9874	21.4755	18.866	16.7965	20.178	22.3632	22.4106	22.0228	21.9874	21.4755	18.866	16.7965	20.178				+	Ctrl_Extra_Fe_Extra	1.53756	0.0496519	2.86701	2.85469	27	27	27	73.8	73.8	73.8	51.454	0	323.31	2586300000	1239	A0A6N4CWG8	A0A6N4CWG8	1741
A0A6N4CT43	Transcription elongation factor GreA (Transcript cleavage factor GreA)	greA ASJ32_04325 GO994_05205	OTHER	Cytoplasmic	K	Necessary for efficient RNA polymerase transcription elongation past template-encoded arresting sites. The arresting sites in DNA have the property of trapping a certain fraction of elongating RNA polymerases that pass through, resulting in locked ternary complexes. Cleavage of the nascent transcript by cleavage factors such as GreA or GreB allows the resumption of elongation from the new 3'termi…	15.7694	15.8246	16.393	17.0933	15.9011	NaN	NaN	14.5217	15.7694	15.8246	16.393	17.0933	15.9011	13.1038	13.0919	14.5217				+	Ctrl_Extra_Fe_Extra	1.54122	0.0494377	2.11548	2.86112	25	25	25	89.9	89.9	89.9	17.611	0	323.31	2301800000	785	A0A6N4CT43	A0A6N4CT43	992
A0A6P1HBV0	3-isopropylmalate dehydrogenase (EC 1.1.1.85) (3-IPM-DH) (Beta-IPM dehydrogenase) (IMDH)	leuB ASJ32_00065 GO994_17620	OTHER	Cytoplasmic	C	Catalyzes the oxidation of 3-carboxy-2-hydroxy-4- methylpentanoate (3-isopropylmalate) to 3-carboxy-4-methyl-2- oxopentanoate. The product decarboxylates to 4-methyl-2 oxopentanoate	18.4904	18.6681	18.671	18.1032	18.099	17.2668	15.4989	15.638	18.4904	18.6681	18.671	18.1032	18.099	17.2668	15.4989	15.638				+	Ctrl_Extra_Fe_Extra	1.54398	0.0492638	1.85749	2.86598	34	34	34	80.1	80.1	80.1	38.88	0	323.31	2062100000	914	A0A6P1HBV0	A0A6P1HBV0	2711
A0A6P1HB69	Thioredoxin reductase (EC 1.8.1.9)	trxB ASJ32_11825 GO994_13035	OTHER	Unknown	C	Belongs to the class-II pyridine nucleotide-disulfide oxidoreductase family	17.8911	17.5001	17.7622	18.0834	17.5793	NaN	NaN	NaN	17.8911	17.5001	17.7622	18.0834	17.5793	12.4125	14.4941	14.4002				+	Ctrl_Extra_Fe_Extra	1.54957	0.0487476	3.08768	2.87581	21	21	21	84.2	84.2	84.2	34.042	0	323.31	2854000000	1040	A0A6P1HB69	A0A6P1HB69	2696
A0A6N4CP31	50S ribosomal protein L13	rplM ASJ32_16460	OTHER	Cytoplasmic	J	This protein is one of the early assembly proteins of the 50S ribosomal subunit, although it is not seen to bind rRNA by itself. It is important during the early stages of 50S assembly	18.5831	17.879	18.7601	18.7582	18.4761	NaN	NaN	NaN	18.5831	17.879	18.7601	18.7582	18.4761	12.3019	13.8991	13.4518				+	Ctrl_Extra_Fe_Extra	1.55545	0.0482035	3.96292	2.88618	28	28	28	97.2	97.2	97.2	15.808	0	323.31	60543000000	6874	A0A6N4CP31	A0A6N4CP31	222
A0A6N4CSK5	50S ribosomal protein L14	rplN ASJ32_10955 GO994_01195	OTHER	Cytoplasmic	J	Binds to 23S rRNA. Forms part of two intersubunit bridges in the 70S ribosome	16.1026	15.9608	16.245	16.3914	16.0352	NaN	NaN	NaN	16.1026	15.9608	16.245	16.3914	16.0352	13.0519	14.1549	14.2355				+	Ctrl_Extra_Fe_Extra	1.5587	0.0479557	1.80555	2.89191	28	28	28	99.2	99.2	99.2	13.403	0	323.31	49626000000	9154	A0A6N4CSK5	A0A6N4CSK5	867
A0A6N4CUT7	Gamma-glutamyl phosphate reductase (GPR) (EC 1.2.1.41) (Glutamate-5-semialdehyde dehydrogenase) (Glutamyl-gamma-semialdehyde dehydrogenase) (GSA dehydrogenase)	proA ASJ32_04840	OTHER	Cytoplasmic	E	Catalyzes the NADPH-dependent reduction of L-glutamate 5-phosphate into L-glutamate 5-semialdehyde and phosphate. The product spontaneously undergoes cyclization to form 1-pyrroline-5- carboxylate	17.6541	18.2492	18.0882	18.1802	17.0006	12.7324	12.7484	16.3469	17.6541	18.2492	18.0882	18.1802	17.0006	12.7324	12.7484	16.3469				+	Ctrl_Extra_Fe_Extra	1.56214	0.0476889	3.33582	2.89798	43	43	43	71.9	71.9	71.9	44.463	0	323.31	4127800000	2061	A0A6N4CUT7	A0A6N4CUT7	1392
A0A6N4CWI7	Aminopeptidase (EC 3.4.11.23)	ASJ32_01945	OTHER	Cytoplasmic	E	Probably plays an important role in intracellular peptide degradation	16.5399	16.2698	16.2915	15.3146	16.0147	NaN	NaN	NaN	16.5399	16.2698	16.2915	15.3146	16.0147	12.7102	13.2496	12.5882				+	Ctrl_Extra_Fe_Extra	1.56519	0.0474666	2.46328	2.90336	41	41	39	85.6	85.6	82.6	41.87	0	323.31	4872100000	1518	A0A6N4CWI7	A0A6N4CWI7	1751
A0A6N4CPH1	Terminase	ASJ32_22735	OTHER	Unknown	L	Phage small terminase subunit	17.488	16.8031	17.5194	17.3254	17.1048	NaN	NaN	NaN	17.488	16.8031	17.5194	17.3254	17.1048	11.7118	13.2821	13.6762				+	Ctrl_Extra_Fe_Extra	1.56881	0.047183	3.34022	2.90976	10	10	3	61.2	61.2	19	27.371	0	149.01	63865000	66	A0A6N4CPH1	A0A6N4CPH1	278
A0A6N4CT83	Asparaginase (EC 3.5.1.1)	ansA ASJ32_04600	OTHER	Cytoplasmic	EJ	Asparaginase	13.8473	13.9586	14.7339	14.3901	NaN	NaN	NaN	NaN	13.8473	13.9586	14.7339	14.3901	12.91	12.6409	12.8279	14.0759				+	Ctrl_Extra_Fe_Extra	1.56964	0.047183	1.11879	2.91121	8	8	8	34.3	34.3	34.3	37.672	0	323.31	407560000	293	A0A6N4CT83	A0A6N4CT83	1020
A0A6N4CT59	ATP-dependent RNA helicase DeaD (EC 3.6.4.13) (Cold-shock DEAD box protein A)	deaD csdA ASJ32_20030	OTHER	Cytoplasmic	JKL	DEAD-box RNA helicase involved in various cellular processes at low temperature, including ribosome biogenesis, mRNA degradation and translation initiation	15.1494	15.2737	15.7883	14.9596	14.3335	NaN	NaN	NaN	15.1494	15.2737	15.7883	14.9596	14.3335	12.3292	13.8506	14.4951				+	Ctrl_Extra_Fe_Extra	1.58426	0.0458577	1.54064	2.9371	107	107	107	98.4	98.4	98.4	68.518	0	323.31	165100000000	22543	A0A6N4CT59	A0A6N4CT59	1004
A0A6N4CZS8	Preprotein translocase subunit Tim44	ASJ32_00660	SP(Sec/SPI)	CytoplasmicMembrane	S	import inner membrane translocase subunit Tim44	14.7513	15.1043	14.5321	15.5304	14.7728	NaN	NaN	NaN	14.7513	15.1043	14.5321	15.5304	14.7728	12.9852	12.6103	13.4423				+	Ctrl_Extra_Fe_Extra	1.58442	0.0458577	1.52687	2.93737	21	21	21	52.9	52.9	52.9	30.538	0	323.31	3218100000	977	A0A6N4CZS8	A0A6N4CZS8	2393
A0A6N4CWJ2	Metal-binding protein	ASJ32_12310	OTHER	Cytoplasmic	S	NIF3 (NGG1p interacting factor 3)	15.1642	15.6054	15.3319	15.4291	15.3276	NaN	NaN	NaN	15.1642	15.6054	15.3319	15.4291	15.3276	12.9476	13.324	13.6234				+	Ctrl_Extra_Fe_Extra	1.59378	0.0450775	1.57697	2.95398	16	16	16	67.6	67.6	67.6	27.809	0	191.42	2153700000	656	A0A6N4CWJ2	A0A6N4CWJ2	1754
A0A6P1H3J1	Pyruvate dehydrogenase E1 component (EC 1.2.4.1)	aceE ASJ32_15010 GO994_02475	OTHER	Cytoplasmic	C	Component of the pyruvate dehydrogenase (PDH) complex, that catalyzes the overall conversion of pyruvate to acetyl-CoA and CO(2)	17.9293	17.822	17.9692	18.0626	17.8507	14.2699	14.9722	15.484	17.9293	17.822	17.9692	18.0626	17.8507	14.2699	14.9722	15.484				+	Ctrl_Extra_Fe_Extra	1.5961	0.044944	2.30157	2.9581	148	148	148	85.1	85.1	85.1	98.71	0	323.31	110790000000	18353	A0A6P1H3J1	A0A6P1H3J1	2561
A0A6N4CZD9	Periplasmic nitrate reductase (EC 1.9.6.1)	napA ASJ32_02760 GO994_09375	TAT(Tat/SPI)	Periplasmic	C	nitrate reductase (NAP). Only expressed at high levels during aerobic growth. NapAB complex receives electrons from the membrane-anchored tetraheme protein NapC	15.7753	15.6356	15.1936	15.8292	15.0323	NaN	NaN	NaN	15.7753	15.6356	15.1936	15.8292	15.0323	13.6559	14.9284	13.2665				+	Ctrl_Extra_Fe_Extra	1.59683	0.044944	1.38767	2.95939	42	42	42	50.7	50.7	50.7	92.834	0	313.38	322530000	471	A0A6N4CZD9	A0A6N4CZD9	2326
A0A6N4CPN0	DNA-directed RNA polymerase subunit beta (RNAP subunit beta) (EC 2.7.7.6) (RNA polymerase subunit beta) (Transcriptase subunit beta)	rpoB ASJ32_07315	OTHER	Cytoplasmic	K	DNA-dependent RNA polymerase catalyzes the transcription of DNA into RNA using the four ribonucleoside triphosphates as substrates	18.0469	17.7904	18.2848	17.8337	17.6133	15.1271	15.6116	16.7837	18.0469	17.7904	18.2848	17.8337	17.6133	15.1271	15.6116	16.7837				+	Ctrl_Extra_Fe_Extra	1.60137	0.0446156	1.705	2.96745	234	234	234	98.6	98.6	98.6	150.25	0	323.31	225870000000	39378	A0A6N4CPN0	A0A6N4CPN0	307
A0A6N4CTP0	Quinolinate synthase A (EC 2.5.1.72)	nadA ASJ32_18485	OTHER	Cytoplasmic	H	Catalyzes the condensation of iminoaspartate with dihydroxyacetone phosphate to form quinolinate	NaN	17.9882	18.0205	18.0607	NaN	NaN	NaN	NaN	13.4618	17.9882	18.0205	18.0607	13.1808	12.0109	14.0781	13.6125				+	Ctrl_Extra_Fe_Extra	1.61599	0.0432415	3.66224	2.9935	29	29	29	77.3	77.3	77.3	38.913	0	218.28	5917000000	793	A0A6N4CTP0	A0A6N4CTP0	1134
A0A6N4CRJ5	Ribose-phosphate pyrophosphokinase (RPPK) (EC 2.7.6.1) (5-phospho-D-ribosyl alpha-1-diphosphate) (Phosphoribosyl diphosphate synthase) (Phosphoribosyl pyrophosphate synthase) (P-Rib-PP synthase) (PRPP synthase) (PRPPase)	prs ASJ32_21395	OTHER	Cytoplasmic	F	Involved in the biosynthesis of the central metabolite phospho-alpha-D-ribosyl-1-pyrophosphate (PRPP) via the transfer of pyrophosphoryl group from ATP to 1-hydroxyl of ribose-5-phosphate (Rib-5-P)	18.4081	17.9898	18.2476	18.2688	17.7538	15.0909	15.7653	17.0249	18.4081	17.9898	18.2476	18.2688	17.7538	15.0909	15.7653	17.0249				+	Ctrl_Extra_Fe_Extra	1.61683	0.0432415	1.81986	2.99499	44	44	44	87.9	87.9	87.9	34.227	0	323.31	34841000000	8659	A0A6N4CRJ5	A0A6N4CRJ5	665
A0A6N4D0L8	Alpha-D-glucose phosphate-specific phosphoglucomutase (Phosphoglucomutase) (EC 5.4.2.2)	ASJ32_02990 GO994_09125	OTHER	Unknown	G	Phosphoglucomutase	15.2711	15.3809	15.6281	16.3292	15.2109	NaN	NaN	14.2878	15.2711	15.3809	15.6281	16.3292	15.2109	12.8742	13.1313	14.2878				+	Ctrl_Extra_Fe_Extra	1.62352	0.0427038	1.77628	3.00693	58	58	58	92.8	92.8	92.8	59.291	0	323.31	8717600000	2263	A0A6N4D0L8	A0A6N4D0L8	2514
A0A6N4CSZ0	Cell division protein ZapB	zapB ASJ32_19115	OTHER	Unknown	D	Non-essential, abundant cell division factor that is required for proper Z-ring formation. It is recruited early to the divisome by direct interaction with FtsZ, stimulating Z-ring assembly and thereby promoting cell division earlier in the cell cycle. Its recruitment to the Z-ring requires functional FtsA or ZipA	14.2408	13.9526	14.4365	14.7253	NaN	NaN	NaN	NaN	14.2408	13.9526	14.4365	14.7253	13.299	13.8885	13.7355	13.8498				+	Ctrl_Extra_Fe_Extra	1.64773	0.0405842	0.645576	3.05026	8	8	8	100	100	100	8.0471	0	31.585	34817000	48	A0A6N4CSZ0	A0A6N4CSZ0	959
A0A6N4CNL2	N5-carboxyaminoimidazole ribonucleotide synthase (N5-CAIR synthase) (EC 6.3.4.18) (5-(carboxyamino)imidazole ribonucleotide synthetase)	purK ASJ32_21635	OTHER	CytoplasmicMembrane	F	Catalyzes the ATP-dependent conversion of 5- aminoimidazole ribonucleotide (AIR) and HCO(3)(-) to N5- carboxyaminoimidazole ribonucleotide (N5-CAIR)	NaN	15.835	16.3042	16.2703	NaN	NaN	NaN	NaN	13.0765	15.835	16.3042	16.2703	13.0923	12.0208	13.0421	13.2828				+	Ctrl_Extra_Fe_Extra	1.64863	0.0405842	2.51201	3.05186	24	24	24	74.1	74.1	74.1	39.991	0	313.04	2610700000	636	A0A6N4CNL2	A0A6N4CNL2	181
A0A6N4CZ35	Glutamine--fructose-6-phosphate aminotransferase [isomerizing] (EC 2.6.1.16) (D-fructose-6-phosphate amidotransferase) (GFAT) (Glucosamine-6-phosphate synthase) (Hexosephosphate aminotransferase) (L-glutamine--D-fructose-6-phosphate amidotransferase)	glmS ASJ32_09835	OTHER	Cytoplasmic	M	Catalyzes the first step in hexosamine metabolism, converting fructose-6P into glucosamine-6P using glutamine as a nitrogen source	17.1637	16.9702	16.694	17.4278	16.5334	13.6195	15.4788	14.9443	17.1637	16.9702	16.694	17.4278	16.5334	13.6195	15.4788	14.9443				+	Ctrl_Extra_Fe_Extra	1.65848	0.0397854	1.91989	3.06957	60	60	60	80.5	80.5	80.5	66.339	0	323.31	5147900000	2205	A0A6N4CZ35	A0A6N4CZ35	2272
A0A6N4CZT5	Cysteine desulfurase	ASJ32_00735	OTHER	Cytoplasmic	E	Catalyzes the removal of elemental sulfur and selenium atoms from L-cysteine, L-cystine, L-selenocysteine, and L- selenocystine to produce L-alanine	16.7171	15.5529	15.1971	15.4621	NaN	NaN	NaN	NaN	16.7171	15.5529	15.1971	15.4621	14.5096	13.5181	12.5896	14.8266				+	Ctrl_Extra_Fe_Extra	1.66065	0.0396838	1.87131	3.07347	22	22	22	64.4	64.4	64.4	44.528	0	154.11	489500000	237	A0A6N4CZT5	A0A6N4CZT5	2398
A0A6N4CY93	50S ribosomal subunit assembly factor BipA (EC 3.6.5.-) (GTP-binding protein BipA)	typA bipA ASJ32_10745 GO994_00990	OTHER	CytoplasmicMembrane	T	GTP-binding protein TypA	19.5376	19.246	19.5209	19.9014	17.7263	NaN	16.5115	16.787	19.5376	19.246	19.5209	19.9014	17.7263	12.3532	16.5115	16.787				+	Ctrl_Extra_Fe_Extra	1.66935	0.0390881	3.707	3.08913	77	77	77	87.9	87.9	87.9	66.567	0	323.31	73190000000	12058	A0A6N4CY93	A0A6N4CY93	2109
A0A6N4CLK8	Formate C-acetyltransferase (EC 2.3.1.54)	pflB ASJ32_06760 GO994_10875	OTHER	Cytoplasmic	C	Pyruvate formate lyase-like	17.3741	18.2291	18.4984	18.6687	17.7157	16.9475	16.1677	16.3214	17.3741	18.2291	18.4984	18.6687	17.7157	16.9475	16.1677	16.3214				+	Ctrl_Extra_Fe_Extra	1.66948	0.0390881	1.40447	3.08936	100	100	99	93.8	93.8	92.9	85.135	0	323.31	17018000000	5028	A0A6N4CLK8	A0A6N4CLK8	69
A0A6P1HE17	Thiol peroxidase (Tpx) (EC 1.11.1.24) (Peroxiredoxin tpx) (Prx) (Thioredoxin peroxidase) (Thioredoxin-dependent peroxiredoxin)	tpx ASJ32_03565 GO994_18890	OTHER	Periplasmic	O	Thiol-specific peroxidase that catalyzes the reduction of hydrogen peroxide and organic hydroperoxides to water and alcohols, respectively. Plays a role in cell protection against oxidative stress by detoxifying peroxides	18.3899	19.1304	18.4428	19.6518	17.6654	NaN	NaN	16.9541	18.3899	19.1304	18.4428	19.6518	17.6654	13.4747	14.026	16.9541				+	Ctrl_Extra_Fe_Extra	1.67843	0.0384685	3.37365	3.1055	20	20	20	100	100	100	17.304	0	323.31	19494000000	2804	A0A6P1HE17	A0A6P1HE17	2731
A0A6N4CVQ8	Phosphoheptose isomerase	ASJ32_16500	OTHER	Cytoplasmic	G	SIS domain	14.4477	15.4459	15.3426	15.4193	NaN	NaN	NaN	NaN	14.4477	15.4459	15.3426	15.4193	14.8831	13.3046	13.5985	13.283				+	Ctrl_Extra_Fe_Extra	1.68381	0.0380886	1.39658	3.11523	8	8	8	53.6	53.6	53.6	20.869	0	282.29	670140000	275	A0A6N4CVQ8	A0A6N4CVQ8	1584
A0A6N4CTV3	50S ribosomal protein L9	rplI ASJ32_03960 GO994_18180	OTHER	Cytoplasmic	J	binds to the 23S rRNA	19.5023	20.1761	19.9566	20.1912	19.7468	18.3717	17.8959	18.4	19.5023	20.1761	19.9566	20.1912	19.7468	18.3717	17.8959	18.4				+	Ctrl_Extra_Fe_Extra	1.7035	0.0365816	1.35295	3.15089	39	39	39	100	100	100	15.329	0	323.31	115600000000	14403	A0A6N4CTV3	A0A6N4CTV3	1174
A0A6N4CQ09	Iron ABC transporter substrate-binding protein	ASJ32_14785	SP(Sec/SPI)	Unknown	P	Periplasmic binding protein	17.4713	17.1984	17.6962	16.8631	16.9068	16.2361	16.5376	16.6712	17.4713	17.1984	17.6962	16.8631	16.9068	16.2361	16.5376	16.6712				+	Ctrl_Extra_Fe_Extra	1.70808	0.0362884	0.71933	3.1592	25	25	25	57.6	57.6	57.6	40.751	0	302.88	629760000	290	A0A6N4CQ09	A0A6N4CQ09	368
A0A6N4CMZ9	3-methyl-2-oxobutanoate hydroxymethyltransferase (EC 2.1.2.11) (Ketopantoate hydroxymethyltransferase) (KPHMT)	panB ASJ32_18595 GO994_17805	OTHER	Unknown	H	Catalyzes the reversible reaction in which hydroxymethyl group from 5,10-methylenetetrahydrofolate is transferred onto alpha-ketoisovalerate to form ketopantoate	17.5583	17.2081	18.1532	17.7803	17.1672	NaN	NaN	NaN	17.5583	17.2081	18.1532	17.7803	17.1672	12.5808	14.4944	14.1462				+	Ctrl_Extra_Fe_Extra	1.71065	0.036164	3.07782	3.16388	23	23	23	84.8	84.8	84.8	28.551	0	323.31	7364200000	2462	A0A6N4CMZ9	A0A6N4CMZ9	136
A0A6P1H4N7	Molybdopterin adenylyltransferase (EC 2.7.7.75)	ASJ32_04680 GO994_04840	OTHER	Cytoplasmic	H	Probable molybdopterin binding domain	16.4742	16.5392	16.0033	15.9065	15.3971	NaN	NaN	NaN	16.4742	16.5392	16.0033	15.9065	15.3971	12.1525	14.4202	14.0604				+	Ctrl_Extra_Fe_Extra	1.72089	0.0354099	2.22327	3.18251	14	14	14	52.3	52.3	52.3	19.138	0	323.31	896770000	447	A0A6P1H4N7	A0A6P1H4N7	2586
A0A6N4CV77	Sulfurtransferase (Thiosulfate sulfurtransferase)	ASJ32_05100 GO994_04375	SP(Sec/SPI)	Periplasmic	M	Rhodanese Homology Domain	17.7877	17.4839	17.2922	17.3764	16.668	NaN	NaN	13.8776	17.7877	17.4839	17.2922	17.3764	16.668	11.3275	14.0388	13.8776				+	Ctrl_Extra_Fe_Extra	1.73036	0.034733	3.5071	3.19978	43	43	43	83.3	83.3	83.3	48.313	0	323.31	1270800000	830	A0A6N4CV77	A0A6N4CV77	1470
A0A6N4CWL4	DNA gyrase subunit A (EC 5.6.2.2)	gyrA ASJ32_13200 GO994_10495	OTHER	Cytoplasmic	L	A type II topoisomerase that negatively supercoils closed circular double-stranded (ds) DNA in an ATP-dependent manner to modulate DNA topology and maintain chromosomes in an underwound state. Negative supercoiling favors strand separation, and DNA replication, transcription, recombination and repair, all of which involve strand separation. Also able to catalyze the interconversion of other topol…	18.3105	18.3218	18.7944	18.1554	16.8677	14.2043	16.7211	16.9996	18.3105	18.3218	18.7944	18.1554	16.8677	14.2043	16.7211	16.9996				+	Ctrl_Extra_Fe_Extra	1.7444	0.0337979	2.19734	3.22544	121	121	121	78.2	78.2	78.2	102.38	0	323.31	31311000000	6710	A0A6N4CWL4	A0A6N4CWL4	1767
A0A6N4CWV7	Argininosuccinate lyase (ASAL) (EC 4.3.2.1) (Arginosuccinase)	argH ASJ32_03330	OTHER	Cytoplasmic	E	argininosuccinate lyase	16.9287	16.5641	16.8811	16.2173	16.1861	NaN	NaN	13.346	16.9287	16.5641	16.8811	16.2173	16.1861	13.1211	14.6043	13.346				+	Ctrl_Extra_Fe_Extra	1.74522	0.0337979	2.33344	3.22694	37	37	37	78.7	78.7	78.7	50.21	0	323.31	2552600000	1203	A0A6N4CWV7	A0A6N4CWV7	1829
A0A6N4CZ94	Enoyl-[acyl-carrier-protein] reductase [NADH] (ENR) (EC 1.3.1.9)	fabV ASJ32_10245	OTHER	Cytoplasmic	I	Involved in the final reduction of the elongation cycle of fatty acid synthesis (FAS II). Catalyzes the reduction of a carbon-carbon double bond in an enoyl moiety that is covalently linked to an acyl carrier protein (ACP)	17.8677	17.541	17.8949	18.2398	17.2531	14.9509	NaN	16.1901	17.8677	17.541	17.8949	18.2398	17.2531	14.9509	14.1989	16.1901				+	Ctrl_Extra_Fe_Extra	1.75586	0.033169	2.23759	3.24645	51	51	51	88.7	88.7	88.7	43.474	0	323.31	12525000000	3296	A0A6N4CZ94	A0A6N4CZ94	2303
A0A6P1H3R8	Aminoacyl-histidine dipeptidase (Beta-Ala-His dipeptidase) (EC 3.4.13.20)	pepD ASJ32_04865 GO994_04635	OTHER	Cytoplasmic	E	aminoacyl-histidine dipeptidase	16.8173	16.9466	17.3738	17.4984	16.8489	15.2572	15.6485	14.8087	16.8173	16.9466	17.3738	17.4984	16.8489	15.2572	15.6485	14.8087				+	Ctrl_Extra_Fe_Extra	1.75655	0.033169	1.51821	3.2477	37	37	37	88.2	88.2	88.2	52.344	0	323.31	7360400000	2468	A0A6P1H3R8	A0A6P1H3R8	2568
A0A6N4CTQ7	Deoxyuridine 5'-triphosphate nucleotidohydrolase (dUTPase) (EC 3.6.1.23) (dUTP pyrophosphatase)	dut ASJ32_18955 GO994_00445	OTHER	Unknown	F	This enzyme is involved in nucleotide metabolism it produces dUMP, the immediate precursor of thymidine nucleotides and it decreases the intracellular concentration of dUTP so that uracil cannot be incorporated into DNA	17.2963	18.4483	17.8376	18.1518	17.2057	15.8296	NaN	16.1213	17.2963	18.4483	17.8376	18.1518	17.2057	15.8296	14.4075	16.1213				+	Ctrl_Extra_Fe_Extra	1.76261	0.032825	2.04248	3.25883	10	10	10	78.3	78.3	78.3	16.168	0	298.78	1121800000	455	A0A6N4CTQ7	A0A6N4CTQ7	1145
A0A6N4CQU4	7-cyano-7-deazaguanine synthase (EC 6.3.4.20) (7-cyano-7-carbaguanine synthase) (PreQ(0) synthase) (Queuosine biosynthesis protein QueC)	queC ASJ32_21105	OTHER	Cytoplasmic	F	Catalyzes the ATP-dependent conversion of 7-carboxy-7- deazaguanine (CDG) to 7-cyano-7-deazaguanine (preQ(0))	13.8932	13.7924	14.4933	15.3171	NaN	NaN	NaN	NaN	13.8932	13.7924	14.4933	15.3171	12.997	13.1814	13.5135	12.8797				+	Ctrl_Extra_Fe_Extra	1.76784	0.0325147	1.23107	3.26847	10	10	10	46.8	46.8	46.8	25.888	0	88.555	310380000	233	A0A6N4CQU4	A0A6N4CQU4	520
A0A6N4CY55	30S ribosomal protein S14	rpsN ASJ32_10970 GO994_01210	OTHER	Cytoplasmic	J	Binds 16S rRNA, required for the assembly of 30S particles and may also be responsible for determining the conformation of the 16S rRNA at the A site	16.1588	15.58	17.0468	16.5342	15.6085	NaN	NaN	NaN	16.1588	15.58	17.0468	16.5342	15.6085	12.8956	14.4343	13.9577				+	Ctrl_Extra_Fe_Extra	1.77458	0.0320966	2.10591	3.28087	19	19	19	81.2	81.2	81.2	11.529	0	323.31	5396400000	2543	A0A6N4CY55	A0A6N4CY55	2084
A0A6N4CYI7	Glutamate synthase	ASJ32_10330	OTHER	Cytoplasmic	C	glutamate synthase	15.971	15.6306	15.8831	16.202	15.6085	NaN	NaN	NaN	15.971	15.6306	15.8831	16.202	15.6085	13.2784	13.6492	14.2417				+	Ctrl_Extra_Fe_Extra	1.78008	0.0317742	1.72727	3.29102	51	51	51	82.2	82.2	82.2	51.753	0	323.31	9643200000	3378	A0A6N4CYI7	A0A6N4CYI7	2164
A0A6N4CX70	3-oxoacyl-[acyl-carrier-protein] synthase 3 (EC 2.3.1.180) (3-oxoacyl-[acyl-carrier-protein] synthase III) (Beta-ketoacyl-ACP synthase III) (KAS III)	fabH ASJ32_12795 GO994_11650	OTHER	Cytoplasmic	I	Catalyzes the condensation reaction of fatty acid synthesis by the addition to an acyl acceptor of two carbons from malonyl-ACP. Catalyzes the first condensation reaction which initiates fatty acid synthesis and may therefore play a role in governing the total rate of fatty acid production. Possesses both acetoacetyl-ACP synthase and acetyl transacylase activities. Its substrate specificity deter…	14.9961	15.0435	14.428	15.1479	NaN	NaN	NaN	NaN	14.9961	15.0435	14.428	15.1479	13.923	11.9537	13.638	13.724				+	Ctrl_Extra_Fe_Extra	1.78246	0.0317564	1.59421	3.29541	24	24	24	68.7	68.7	68.7	33.572	0	323.31	2634800000	881	A0A6N4CX70	A0A6N4CX70	1891
A0A6P1HBC7	Ribosomal protein S12 methylthiotransferase RimO (S12 MTTase) (S12 methylthiotransferase) (EC 2.8.4.4) (Ribosomal protein S12 (aspartate-C(3))-methylthiotransferase) (Ribosome maturation factor RimO)	rimO ASJ32_14155 GO994_14485	OTHER	Cytoplasmic	J	Catalyzes the methylthiolation of an aspartic acid residue of ribosomal protein S12	14.2837	14.672	14.8289	15.2797	NaN	NaN	NaN	NaN	14.2837	14.672	14.8289	15.2797	13.3811	12.3148	14.0364	13.7063				+	Ctrl_Extra_Fe_Extra	1.78502	0.0316598	1.40647	3.30013	42	42	42	75.3	75.3	75.3	49.525	0	323.31	14562000000	1596	A0A6P1HBC7	A0A6P1HBC7	2702
A0A6N4CZZ9	Phosphoheptose isomerase (EC 5.3.1.28) (Sedoheptulose 7-phosphate isomerase)	gmhA ASJ32_02820	OTHER	Cytoplasmic	G	Catalyzes the isomerization of sedoheptulose 7-phosphate in D-glycero-D-manno-heptose 7-phosphate	19.7646	19.1327	19.8218	19.292	18.8722	16.2999	17.7044	17.7839	19.7646	19.1327	19.8218	19.292	18.8722	16.2999	17.7044	17.7839				+	Ctrl_Extra_Fe_Extra	1.79299	0.0311649	1.83771	3.31487	23	23	23	97.9	97.9	97.9	20.837	0	323.31	3993300000	1069	A0A6N4CZZ9	A0A6N4CZZ9	2436
A0A6N4CQM4	Glutamine-dependent NAD(+) synthetase (EC 6.3.5.1) (NAD(+) synthase [glutamine-hydrolyzing])	nadE ASJ32_03885	SP(Sec/SPI)	Cytoplasmic	H	Catalyzes the ATP-dependent amidation of deamido-NAD to form NAD. Uses L-glutamine as a nitrogen source	15.5945	15.1303	15.2075	15.9472	15.0829	NaN	NaN	NaN	15.5945	15.1303	15.2075	15.9472	15.0829	13.2348	13.2256	12.4044				+	Ctrl_Extra_Fe_Extra	1.79627	0.0310115	1.98296	3.32094	43	43	43	66.7	66.7	66.7	59.524	0	323.31	1989200000	791	A0A6N4CQM4	A0A6N4CQM4	476
A0A6N4CXJ9	Acyl carrier protein (ACP)	acpP ASJ32_12810 GO994_11635	OTHER	Cytoplasmic	IQ	Carrier of the growing fatty acid chain in fatty acid biosynthesis	18.9125	18.3861	18.5548	18.3153	16.4474	17.2874	18.1464	17.3364	18.9125	18.3861	18.5548	18.3153	16.4474	17.2874	18.1464	17.3364				+	Ctrl_Extra_Fe_Extra	1.80118	0.0307427	1.23778	3.33004	8	8	8	51.3	51.3	51.3	8.7015	0	120.98	311210000	151	A0A6N4CXJ9	A0A6N4CXJ9	1965
A0A6N4CSZ5	Cystathionine gamma-synthase (O-succinylhomoserine (Thiol)-lyase) (EC 2.5.1.48)	metB ASJ32_05760 GO994_20055	OTHER	Cytoplasmic	E	Cys/Met metabolism PLP-dependent enzyme	16.7429	17.3612	15.4071	15.3799	NaN	NaN	NaN	NaN	16.7429	17.3612	15.4071	15.3799	15.2092	14.1515	13.3173	13.4829				+	Ctrl_Extra_Fe_Extra	1.80128	0.0307427	2.18256	3.33023	20	20	20	61.3	61.3	61.3	41.471	0	323.31	5067400000	1333	A0A6N4CSZ5	A0A6N4CSZ5	964
Q6EVH0	S-layer protein (Virulence array protein) (Fragment)	vapA ASJ32_19910	SP(Sec/SPI)	Unknown	-	-	28.1021	27.5651	27.4088	28.2139	26.385	27.4006	26.1785	26.8435	28.1021	27.5651	27.4088	28.2139	26.385	27.4006	26.1785	26.8435				+	Ctrl_Extra_Fe_Extra	1.80607	0.0305586	1.1206	3.33911	62	62	62	81.3	81.3	81.3	52.916	0	323.31	206740000000	39634	Q6EVH0	Q6EVH0	2836
A0A6N4CY82	Methionyl-tRNA formyltransferase (EC 2.1.2.9)	fmt ASJ32_10640	OTHER	Cytoplasmic	J	Attaches a formyl group to the free amino group of methionyl-tRNA(fMet). The formyl group appears to play a dual role in the initiator identity of N-formylmethionyl-tRNA by promoting its recognition by IF2 and preventing the misappropriation of this tRNA by the elongation apparatus	15.3578	15.3137	15.2514	15.6547	13.2746	NaN	NaN	NaN	15.3578	15.3137	15.2514	15.6547	13.2746	12.5054	12.9259	15.0957				+	Ctrl_Extra_Fe_Extra	1.82069	0.0296249	1.944	3.3663	31	31	31	87.6	87.6	87.6	33.942	0	323.31	975360000	600	A0A6N4CY82	A0A6N4CY82	2101
A0A6N4CVF7	Nitroreductase	ASJ32_17100 GO994_05690	OTHER	Unknown	S	Nitroreductase	16.3752	16.4485	16.2215	16.7181	15.8945	NaN	NaN	NaN	16.3752	16.4485	16.2215	16.7181	15.8945	12.7557	14.0102	12.4713				+	Ctrl_Extra_Fe_Extra	1.82866	0.0291636	2.65794	3.38114	21	21	21	89.5	89.5	89.5	22.584	0	215.97	2365200000	467	A0A6N4CVF7	A0A6N4CVF7	1519
A0A6N4CY88	50S ribosomal protein L5	rplE ASJ32_10965 GO994_01205	OTHER	Cytoplasmic	J	This is 1 of the proteins that binds and probably mediates the attachment of the 5S RNA into the large ribosomal subunit, where it forms part of the central protuberance. In the 70S ribosome it contacts protein S13 of the 30S subunit (bridge B1b), connecting the 2 subunits	16.1258	16.0553	15.5158	16.1172	15.0023	NaN	NaN	NaN	16.1258	16.0553	15.5158	16.1172	15.0023	11.6085	13.6917	13.782				+	Ctrl_Extra_Fe_Extra	1.82902	0.0291636	2.43236	3.38182	46	46	46	99.4	99.4	99.4	20.24	0	323.31	119590000000	21394	A0A6N4CY88	A0A6N4CY88	2106
A0A6N4CUT1	Adenylosuccinate synthetase (AMPSase) (AdSS) (EC 6.3.4.4) (IMP--aspartate ligase)	purA ASJ32_01490 GO994_07020	OTHER	Cytoplasmic	F	Plays an important role in the de novo pathway of purine nucleotide biosynthesis. Catalyzes the first committed step in the biosynthesis of AMP from IMP	18.4783	18.1221	18.3017	18.647	17.384	NaN	NaN	16.0761	18.4783	18.1221	18.3017	18.647	17.384	13.3995	13.7938	16.0761				+	Ctrl_Extra_Fe_Extra	1.82911	0.0291636	3.22391	3.382	46	46	46	86.8	86.8	86.8	45.255	0	323.31	20597000000	3012	A0A6N4CUT1	A0A6N4CUT1	1387
A0A6N4CP48	L,D-transpeptidase	ASJ32_20905	SP(Sec/SPI)	Unknown	M	L,D-transpeptidase catalytic domain	17.4455	17.4943	16.4357	17.1446	15.6735	NaN	NaN	15.6837	17.4455	17.4943	16.4357	17.1446	15.6735	13.4541	12.6247	15.6837				+	Ctrl_Extra_Fe_Extra	1.83272	0.0291233	2.77101	3.38872	28	28	28	55.3	55.3	55.3	33.32	0	323.31	4192700000	1507	A0A6N4CP48	A0A6N4CP48	227
A0A6N4CX78	Phosphoribosylaminoimidazole-succinocarboxamide synthase (EC 6.3.2.6) (SAICAR synthetase)	purC ASJ32_00140	OTHER	Cytoplasmic	F	Belongs to the SAICAR synthetase family	17.6402	16.9077	17.3582	17.8241	16.5977	NaN	NaN	15.1564	17.6402	16.9077	17.3582	17.8241	16.5977	13.0657	14.6736	15.1564				+	Ctrl_Extra_Fe_Extra	1.83347	0.0291233	2.55918	3.39013	52	52	52	93.2	93.2	93.2	41.034	0	323.31	11332000000	3026	A0A6N4CX78	A0A6N4CX78	1896
A0A6N4CUP8	Lon protease (EC 3.4.21.53) (ATP-dependent protease La)	lon ASJ32_16845	OTHER	Cytoplasmic	O	ATP-dependent serine protease that mediates the selective degradation of mutant and abnormal proteins as well as certain short-lived regulatory proteins. Required for cellular homeostasis and for survival from DNA damage and developmental changes induced by stress. Degrades polypeptides processively to yield small peptide fragments that are 5 to 10 amino acids long. Binds to DNA in a double-stran…	15.6778	16.2498	15.3837	15.4157	14.8506	NaN	NaN	NaN	15.6778	16.2498	15.3837	15.4157	14.8506	11.7867	13.8131	13.0096				+	Ctrl_Extra_Fe_Extra	1.8493	0.0282586	2.31676	3.41974	125	125	125	88.8	88.8	88.8	87.764	0	323.31	42070000000	9916	A0A6N4CUP8	A0A6N4CUP8	1361
A0A6N4CR60	Protease 2 (EC 3.4.21.83)	ASJ32_06515	SP(Sec/SPI)	Periplasmic	E	Protease II	21.4363	20.21	20.4783	20.2371	18.7762	18.9985	20.0274	18.4542	21.4363	20.21	20.4783	20.2371	18.7762	18.9985	20.0274	18.4542				+	Ctrl_Extra_Fe_Extra	1.85153	0.0281894	1.52637	3.42392	74	74	74	88.9	88.9	88.9	81.136	0	323.31	4911800000	2163	A0A6N4CR60	A0A6N4CR60	583
A0A6P1H7I7	N-succinylarginine dihydrolase (EC 3.5.3.23)	astB ASJ32_01530 GO994_07060	OTHER	Cytoplasmic	E	Catalyzes the hydrolysis of N(2)-succinylarginine into N(2)-succinylornithine, ammonia and CO(2)	17.6193	18.6795	16.5552	16.2552	NaN	16.2616	NaN	NaN	17.6193	18.6795	16.5552	16.2552	12.4736	16.2616	13.2994	13.4526				+	Ctrl_Extra_Fe_Extra	1.85559	0.0280023	3.40552	3.43155	33	33	33	78.2	78.2	78.2	48.991	0	323.31	4314700000	1776	A0A6P1H7I7	A0A6P1H7I7	2637
E5F4L5	Malate dehydrogenase (EC 1.1.1.37)	mdh ASJ32_03710	SP(Sec/SPI)	Unknown	C	Catalyzes the reversible oxidation of malate to oxaloacetate	18.8866	18.2089	18.823	19.0766	17.6799	NaN	NaN	15.7984	18.8866	18.2089	18.823	19.0766	17.6799	14.6822	12.9392	15.7984				+	Ctrl_Extra_Fe_Extra	1.85627	0.0280023	3.4738	3.43282	41	41	41	100	100	100	32.139	0	323.31	12926000000	2806	E5F4L5	E5F4L5	2834
A0A6N4CUE2	tRNA-dihydrouridine(20/20a) synthase (EC 1.3.1.91) (U20-specific dihydrouridine synthase) (U20-specific Dus) (tRNA-dihydrouridine synthase A)	dusA ASJ32_15715	OTHER	Cytoplasmic	J	Catalyzes the synthesis of 5,6-dihydrouridine (D), a modified base found in the D-loop of most tRNAs, via the reduction of the C5-C6 double bond in target uridines. Specifically modifies U20 and U20a in tRNAs	15.7466	16.5534	15.3887	NaN	NaN	NaN	NaN	NaN	15.7466	16.5534	15.3887	13.4376	13.3945	12.7411	12.9619	12.6689				+	Ctrl_Extra_Fe_Extra	1.85797	0.0280006	2.34	3.43602	32	32	32	89	89	89	37.026	0	323.31	1114400000	676	A0A6N4CUE2	A0A6N4CUE2	1287
A0A6P1H5Q0	Alkyl hydroperoxide reductase subunit F	ahpF ASJ32_02055 GO994_10115	OTHER	CytoplasmicMembrane	C	Alkyl hydroperoxide reductase	17.3658	17.4215	17.4947	17.9974	17.0393	15.7775	15.1318	16.3761	17.3658	17.4215	17.4947	17.9974	17.0393	15.7775	15.1318	16.3761				+	Ctrl_Extra_Fe_Extra	1.85876	0.0280006	1.48868	3.43751	59	59	59	85.1	85.1	85.1	56.175	0	323.31	25455000000	5384	A0A6P1H5Q0	A0A6P1H5Q0	2602
A0A6N4CSX7	Uncharacterized protein	ASJ32_17560	SP(Sec/SPI)	Unknown	P	Protein of unknown function (DUF2796)	19.0984	19.7524	19.1225	19.5242	17.0863	17.5388	NaN	NaN	19.0984	19.7524	19.1225	19.5242	17.0863	17.5388	13.5075	13.1604				+	Ctrl_Extra_Fe_Extra	1.87935	0.0268016	4.05111	3.47627	11	11	11	42.6	42.6	42.6	20.193	0	323.31	5050100000	1047	A0A6N4CSX7	A0A6N4CSX7	948
A0A6N4CT54	ATP synthase subunit beta (EC 7.1.2.2) (ATP synthase F1 sector subunit beta) (F-ATPase subunit beta)	atpD ASJ32_09795 GO994_22050	OTHER	Cytoplasmic	C	Produces ATP from ADP in the presence of a proton gradient across the membrane. The catalytic sites are hosted primarily by the beta subunits	17.6323	18.0895	17.9602	17.7721	16.7908	12.8727	13.2556	15.4633	17.6323	18.0895	17.9602	17.7721	16.7908	12.8727	13.2556	15.4633				+	Ctrl_Extra_Fe_Extra	1.89217	0.026093	3.26791	3.50052	64	64	64	97	97	97	50.362	0	323.31	94797000000	16794	A0A6N4CT54	A0A6N4CT54	1001
A0A6N4CRG9	Cold-shock protein (RNA chaperone/antiterminator CspA)	cspA ASJ32_06590 GO994_18815	OTHER	Cytoplasmic	K	'Cold-shock' DNA-binding domain	19.6635	20.5693	20.7931	21.0915	18.5252	NaN	NaN	17.0022	19.6635	20.5693	20.7931	21.0915	18.5252	12.3227	14.9457	17.0022				+	Ctrl_Extra_Fe_Extra	1.89463	0.0260167	4.8304	3.50518	11	11	11	91.4	91.4	91.4	7.5024	0	323.31	20724000000	4767	A0A6N4CRG9	A0A6N4CRG9	650
A0A6N4CZE5	Glucosamine-6-phosphate deaminase (EC 3.5.99.6) (GlcN6P deaminase) (GNPDA) (Glucosamine-6-phosphate isomerase)	nagB ASJ32_03045	OTHER	Cytoplasmic	G	Catalyzes the reversible isomerization-deamination of glucosamine 6-phosphate (GlcN6P) to form fructose 6-phosphate (Fru6P) and ammonium ion	15.3955	16.2033	14.8653	14.2693	NaN	NaN	NaN	NaN	15.3955	16.2033	14.8653	14.2693	13.3366	13.7289	12.4768	13.893				+	Ctrl_Extra_Fe_Extra	1.90285	0.0256701	1.82455	3.52077	19	19	19	53.8	53.8	53.8	29.625	0	323.31	4106200000	1531	A0A6N4CZE5	A0A6N4CZE5	2329
A0A6N4CPU2	ADP-ribose diphosphatase	ASJ32_05730	OTHER	Cytoplasmic	L	Hydrolase	13.7633	15.0487	14.6381	14.9629	NaN	NaN	NaN	NaN	13.7633	15.0487	14.6381	14.9629	13.9477	12.5848	12.8129	13.1721				+	Ctrl_Extra_Fe_Extra	1.903	0.0256701	1.47389	3.52105	23	23	23	87.1	87.1	87.1	22.775	0	323.31	777680000	394	A0A6N4CPU2	A0A6N4CPU2	339
A0A6N4CPU8	Regulator of ribonuclease activity A	rraA ASJ32_07765 GO994_20870	OTHER	Cytoplasmic	H	Globally modulates RNA abundance by binding to RNase E (Rne) and regulating its endonucleolytic activity. Can modulate Rne action in a substrate-dependent manner by altering the composition of the degradosome. Modulates RNA-binding and helicase activities of the degradosome	14.7705	15.1148	15.2626	15.1345	14.2989	NaN	NaN	NaN	14.7705	15.1148	15.2626	15.1345	14.2989	12.9476	12.0091	13.7926				+	Ctrl_Extra_Fe_Extra	1.90532	0.0256664	1.80857	3.52546	10	10	10	42.2	42.2	42.2	17.237	0	228.66	1946700000	554	A0A6N4CPU8	A0A6N4CPU8	341
A0A6N4CP16	Lipopolysaccharide export system protein LptA	lptA ASJ32_16355	SP(Sec/SPI)	Unknown	S	Involved in the assembly of lipopolysaccharide (LPS). Required for the translocation of LPS from the inner membrane to the outer membrane. May form a bridge between the inner membrane and the outer membrane, via interactions with LptC and LptD, thereby facilitating LPS transfer across the periplasm	14.4083	14.9229	14.5182	NaN	NaN	NaN	NaN	NaN	14.4083	14.9229	14.5182	13.0792	13.0554	12.8463	11.983	12.4996				+	Ctrl_Extra_Fe_Extra	1.90758	0.0256042	1.63602	3.52976	20	20	20	66.9	66.9	66.9	19.315	0	177.22	853310000	472	A0A6N4CP16	A0A6N4CP16	218
A0A6N4CXQ0	Isocitrate dehydrogenase (EC 1.1.1.41)	ASJ32_01180	OTHER	Cytoplasmic	C	Isocitrate/isopropylmalate dehydrogenase	14.8352	15.084	15.256	16.2117	NaN	NaN	NaN	NaN	14.8352	15.084	15.256	16.2117	13.6985	13.1454	14.7064	13.2553				+	Ctrl_Extra_Fe_Extra	1.90837	0.0256042	1.64534	3.53125	27	27	27	53.1	53.1	53.1	36.103	0	323.31	2746400000	973	A0A6N4CXQ0	A0A6N4CXQ0	1996
A0A6N4CWL6	Alkyl hydroperoxide reductase C (EC 1.11.1.26) (Peroxiredoxin) (Thioredoxin peroxidase)	ASJ32_02050	OTHER	Cytoplasmic	O	Alkyl hydroperoxide reductase	20.7313	21.8405	21.5014	22.0872	20.6921	18.4741	19.1659	19.9007	20.7313	21.8405	21.5014	22.0872	20.6921	18.4741	19.1659	19.9007				+	Ctrl_Extra_Fe_Extra	1.90901	0.0256042	1.9819	3.53247	37	37	37	99.5	99.5	99.5	20.788	0	323.31	66096000000	8428	A0A6N4CWL6	A0A6N4CWL6	1769
A0A6N4CVB6	Putative agmatine deiminase (EC 3.5.3.12) (Agmatine iminohydrolase)	aguA ASJ32_15840 GO994_18745	OTHER	Cytoplasmic	E	agmatine deiminase	15.6371	16.9571	15.8238	15.679	NaN	NaN	NaN	NaN	15.6371	16.9571	15.8238	15.679	13.7839	12.2315	15.1492	13.2916				+	Ctrl_Extra_Fe_Extra	1.91002	0.0256042	2.41021	3.5344	28	28	28	64.9	64.9	64.9	40.172	0	323.31	1009300000	740	A0A6N4CVB6	A0A6N4CVB6	1494
A0A6N4CT26	ABC transporter substrate-binding protein	ASJ32_18825	SP(Sec/SPI)	Unknown	P	Bacterial extracellular solute-binding protein	14.3119	15.1806	NaN	14.3558	NaN	NaN	NaN	NaN	14.3119	15.1806	14.0863	14.3558	13.4044	12.5077	13.7028	13.3513				+	Ctrl_Extra_Fe_Extra	1.91175	0.0256042	1.24214	3.53769	9	9	9	33.6	33.6	33.6	37.556	0.00042017	19.616	6340900	20	A0A6N4CT26	A0A6N4CT26	983
A0A6N4CYV9	tRNA (cytidine/uridine-2'-O-)-methyltransferase TrmJ (EC 2.1.1.200) (tRNA (cytidine(32)/uridine(32)-2'-O)-methyltransferase) (tRNA Cm32/Um32 methyltransferase)	trmJ ASJ32_01985	OTHER	Cytoplasmic	J	Catalyzes the formation of 2'O-methylated cytidine (Cm32) or 2'O-methylated uridine (Um32) at position 32 in tRNA	14.6584	14.1139	14.945	15.2078	NaN	NaN	NaN	NaN	14.6584	14.1139	14.945	15.2078	13.4919	12.4775	13.925	13.5254				+	Ctrl_Extra_Fe_Extra	1.9192	0.0252807	1.37634	3.55186	16	16	16	81.2	81.2	81.2	26.351	0	323.31	1049800000	424	A0A6N4CYV9	A0A6N4CYV9	2231
A0A6N4CWL8	L-threonine dehydratase (EC 4.3.1.19) (Threonine deaminase)	ilvA ASJ32_13870	OTHER	Cytoplasmic	E	Catalyzes the anaerobic formation of alpha-ketobutyrate and ammonia from threonine in a two-step reaction. The first step involved a dehydration of threonine and a production of enamine intermediates (aminocrotonate), which tautomerizes to its imine form (iminobutyrate). Both intermediates are unstable and short- lived. The second step is the nonenzymatic hydrolysis of the enamine imine intermedi…	15.3665	16.2011	16.2196	16.6308	15.3229	NaN	NaN	14.3578	15.3665	16.2011	16.2196	16.6308	15.3229	13.0018	13.8494	14.3578				+	Ctrl_Extra_Fe_Extra	1.92595	0.0249612	1.97155	3.56475	58	58	58	87.9	87.9	87.9	55.488	0	323.31	3349200000	1664	A0A6N4CWL8	A0A6N4CWL8	1771
A0A6P1H8A4	1-(5-phosphoribosyl)-5-[(5-phosphoribosylamino)methylideneamino] imidazole-4-carboxamide isomerase (EC 5.3.1.16) (Phosphoribosylformimino-5-aminoimidazole carboxamide ribotide isomerase)	hisA ASJ32_12555 GO994_11895	OTHER	Cytoplasmic	E	1-(5-phosphoribosyl)-5- (5-phosphoribosylamino)methylideneamino imidazole-4-carboxamide isomerase	14.1443	14.9729	NaN	14.592	NaN	NaN	NaN	NaN	14.1443	14.9729	13.3745	14.592	13.2665	11.6489	12.5978	12.6922				+	Ctrl_Extra_Fe_Extra	1.93571	0.0244757	1.71957	3.5834	21	21	21	81	81	81	26.263	0	323.31	1005300000	465	A0A6P1H8A4	A0A6P1H8A4	2651
A0A6N4CVP3	UDP-N-acetylmuramoylalanine--D-glutamate ligase (EC 6.3.2.9) (D-glutamic acid-adding enzyme) (UDP-N-acetylmuramoyl-L-alanyl-D-glutamate synthetase)	murD ASJ32_15120 GO994_02360	OTHER	Cytoplasmic	M	Cell wall formation. Catalyzes the addition of glutamate to the nucleotide precursor UDP-N-acetylmuramoyl-L-alanine (UMA)	14.7403	NaN	14.6151	14.9057	NaN	NaN	NaN	NaN	14.7403	13.6517	14.6151	14.9057	13.6792	12.3856	12.605	13.3098				+	Ctrl_Extra_Fe_Extra	1.94123	0.0242356	1.48328	3.59397	25	25	25	72.4	72.4	72.4	45.657	0	238.05	363300000	264	A0A6N4CVP3	A0A6N4CVP3	1574
A0A6N4CRP7	2',3'-cyclic-nucleotide 2'-phosphodiesterase/3'-nucleotidase (EC 3.1.3.6) (EC 3.1.4.16)	cpdB ASJ32_05610	LIPO(Sec/SPII)	Periplasmic	F	Belongs to the 5'-nucleotidase family	16.1025	17.0972	14.7383	14.4108	NaN	NaN	NaN	NaN	16.1025	17.0972	14.7383	14.4108	13.7091	12.8566	13.2267	13.2456				+	Ctrl_Extra_Fe_Extra	1.94451	0.0241221	2.32769	3.60025	50	50	50	75.7	75.7	75.7	72.717	0	323.31	3284800000	1651	A0A6N4CRP7	A0A6N4CRP7	692
A0A6N4CUH2	Leucine--tRNA ligase (EC 6.1.1.4) (Leucyl-tRNA synthetase) (LeuRS)	leuS ASJ32_17035 GO994_05625	OTHER	Cytoplasmic	J	Belongs to the class-I aminoacyl-tRNA synthetase family	18.2016	17.5548	18.7105	18.6698	17.4717	14.5758	NaN	14.8227	18.2016	17.5548	18.7105	18.6698	17.4717	14.5758	13.4971	14.8227				+	Ctrl_Extra_Fe_Extra	1.94649	0.0240811	3.19232	3.60406	92	92	92	71.8	71.8	71.8	96.438	0	323.31	12338000000	4324	A0A6N4CUH2	A0A6N4CUH2	1306
A0A6N4CUZ8	Glycine/betaine ABC transporter substrate-binding protein	proX ASJ32_04645	SP(Sec/SPI)	Periplasmic	E	glycine, betaine	18.093	18.7024	18.124	16.7932	16.2981	14.6816	15.8851	16.5271	18.093	18.7024	18.124	16.7932	16.2981	14.6816	15.8851	16.5271				+	Ctrl_Extra_Fe_Extra	1.95096	0.0239576	2.08019	3.61264	19	19	19	55.4	55.4	55.4	36.272	0	323.31	546830000	337	A0A6N4CUZ8	A0A6N4CUZ8	1420
A0A6N4CVN5	3-deoxy-D-manno-octulosonate 8-phosphate phosphatase KdsC (EC 3.1.3.45) (KDO 8-P phosphatase)	ASJ32_16345	OTHER	Cytoplasmic	S	Involved in the biosynthesis of lipopolysaccharides (LPSs). Catalyzes the hydrolysis of 3-deoxy-D-manno-octulosonate 8-phosphate (KDO 8-P) to 3-deoxy-D-manno-octulosonate (KDO) and inorganic phosphate	15.749	17.2031	15.045	14.5103	NaN	NaN	NaN	NaN	15.749	17.2031	15.045	14.5103	13.828	12.6482	13.6456	13.0993				+	Ctrl_Extra_Fe_Extra	1.95237	0.0239576	2.32157	3.61536	12	12	12	83.7	83.7	83.7	19.575	0	182.57	393050000	239	A0A6N4CVN5	A0A6N4CVN5	1567
A0A6N4CUH9	Polyribonucleotide nucleotidyltransferase (EC 2.7.7.8) (Polynucleotide phosphorylase) (PNPase)	pnp ASJ32_04240	OTHER	Cytoplasmic	J	Involved in mRNA degradation. Catalyzes the phosphorolysis of single-stranded polyribonucleotides processively in the 3'- to 5'-direction	19.5131	19.2455	19.9124	20.0109	17.3518	10.807	14.0201	15.8992	19.5131	19.2455	19.9124	20.0109	17.3518	10.807	14.0201	15.8992				+	Ctrl_Extra_Fe_Extra	1.95319	0.0239576	5.15092	3.61694	100	100	100	75.5	75.5	75.5	76.442	0	323.31	123450000000	22289	A0A6N4CUH9	A0A6N4CUH9	1313
A0A6N4CP06	Regulator	ASJ32_07300	OTHER	Cytoplasmic	J	Endoribonuclease L-PSP	17.4452	19.0315	17.6815	18.43	17.1955	NaN	NaN	NaN	17.4452	19.0315	17.6815	18.43	17.1955	12.6538	13.8789	13.1722				+	Ctrl_Extra_Fe_Extra	1.95434	0.0239576	3.92195	3.61913	18	18	18	99.2	99.2	99.2	13.339	0	323.31	1495000000	415	A0A6N4CP06	A0A6N4CP06	213
A0A6N4CRN3	Phosphoribosylglycinamide formyltransferase (EC 2.1.2.2) (5'-phosphoribosylglycinamide transformylase) (GAR transformylase) (GART)	purN ASJ32_12305	LIPO(Sec/SPII)	Cytoplasmic	F	Catalyzes the transfer of a formyl group from 10- formyltetrahydrofolate to 5-phospho-ribosyl-glycinamide (GAR), producing 5-phospho-ribosyl-N-formylglycinamide (FGAR) and tetrahydrofolate	14.8856	15.0585	15.4346	15.8714	NaN	NaN	NaN	NaN	14.8856	15.0585	15.4346	15.8714	14.4011	12.7973	13.8366	12.114				+	Ctrl_Extra_Fe_Extra	1.96056	0.0237213	2.02526	3.6311	14	14	14	84	84	84	22.698	0	323.31	1894400000	952	A0A6N4CRN3	A0A6N4CRN3	687
A0A6N4CSQ0	Carbamoyl-phosphate synthase small chain (EC 6.3.5.5) (Carbamoyl-phosphate synthetase glutamine chain)	carA ASJ32_19540 GO994_08045	OTHER	Cytoplasmic	F	Carbamoyl-phosphate synthetase glutamine chain	16.9796	16.6507	16.9094	17.2896	15.4249	NaN	NaN	NaN	16.9796	16.6507	16.9094	17.2896	15.4249	11.8759	15.0771	13.0715				+	Ctrl_Extra_Fe_Extra	1.96299	0.0236578	3.09498	3.63578	34	34	34	75.5	75.5	75.5	41.484	0	323.31	9545200000	2608	A0A6N4CSQ0	A0A6N4CSQ0	895
A0A6N4CSJ6	Baseplate_J domain-containing protein	ASJ32_05965	OTHER	Unknown	S	Baseplate J-like protein	16.8687	16.1589	16.8566	15.8701	14.1298	NaN	NaN	14.5532	16.8687	16.1589	16.8566	15.8701	14.1298	11.903	14.8202	14.5532				+	Ctrl_Extra_Fe_Extra	1.96451	0.023644	2.58703	3.63872	22	22	12	58.7	58.7	39.2	42.93	0	212.23	149600000	353	A0A6N4CSJ6	A0A6N4CSJ6	862
A0A6N4CUT4	Probable Fe(2+)-trafficking protein	ASJ32_15985 GO994_19600	OTHER	Unknown	CO	Could be a mediator in iron transactions between iron acquisition and iron-requiring processes, such as synthesis and or repair of Fe-S clusters in biosynthetic enzymes	NaN	15.0895	15.4825	16.3235	NaN	NaN	NaN	NaN	14.0774	15.0895	15.4825	16.3235	13.416	13.6788	13.6765	13.2203				+	Ctrl_Extra_Fe_Extra	1.96633	0.0236147	1.74533	3.64222	16	16	15	74.4	74.4	74.4	10.581	0	101.1	325170000	196	A0A6N4CUT4	A0A6N4CUT4	1389
A0A6N4D0P2	3-isopropylmalate dehydratase large subunit (EC 4.2.1.33) (Alpha-IPM isomerase) (IPMI) (Isopropylmalate isomerase)	leuC ASJ32_00060 GO994_17625	OTHER	Cytoplasmic	E	Catalyzes the isomerization between 2-isopropylmalate and 3-isopropylmalate, via the formation of 2-isopropylmaleate	14.9098	14.407	14.5126	15.2289	NaN	NaN	NaN	NaN	14.9098	14.407	14.5126	15.2289	13.9533	14.1478	13.2468	13.1683				+	Ctrl_Extra_Fe_Extra	1.97086	0.0234386	1.13552	3.65096	33	33	33	59.1	59.1	59.1	49.804	0	323.31	2153900000	1225	A0A6N4D0P2	A0A6N4D0P2	2518
A0A6P1H3W8	Arginine N-succinyltransferase (EC 2.3.1.109)	astA ASJ32_17370 GO994_05960	OTHER	Cytoplasmic	E	Arginine N-succinyltransferase beta subunit	18.1043	18.1116	17.8627	16.9392	17.0806	16.1079	15.7398	15.3911	18.1043	18.1116	17.8627	16.9392	17.0806	16.1079	15.7398	15.3911				+	Ctrl_Extra_Fe_Extra	1.9731	0.023387	1.67461	3.65529	37	37	37	74.9	74.9	74.9	38.108	0	323.31	3752100000	1880	A0A6P1H3W8	A0A6P1H3W8	2572
A0A6N4CWJ9	Glutathione S-transferase	ASJ32_13090 GO994_10605	OTHER	Cytoplasmic	H	Glutathione S-transferase, C-terminal domain	14.7149	14.5682	15.6071	15.234	NaN	NaN	NaN	NaN	14.7149	14.5682	15.6071	15.234	13.6422	13.0671	14.4157	13.6307				+	Ctrl_Extra_Fe_Extra	1.97903	0.0232071	1.34214	3.66675	18	18	18	86.3	86.3	86.3	22.494	0	323.31	816860000	419	A0A6N4CWJ9	A0A6N4CWJ9	1757
A0A6N4CP86	4-hydroxy-tetrahydrodipicolinate synthase (HTPA synthase) (EC 4.3.3.7)	dapA ASJ32_16050	OTHER	Cytoplasmic	E	Catalyzes the condensation of (S)-aspartate-beta- semialdehyde (S)-ASA and pyruvate to 4-hydroxy- tetrahydrodipicolinate (HTPA)	17.665	19.3943	15.6067	15.9159	NaN	NaN	NaN	NaN	17.665	19.3943	15.6067	15.9159	14.0045	14.1848	13.4949	11.8304				+	Ctrl_Extra_Fe_Extra	1.97944	0.0232071	3.76687	3.66754	29	29	29	97.9	97.9	97.9	31.394	0	323.31	12783000000	3021	A0A6N4CP86	A0A6N4CP86	243
A0A6N4CWR9	Formate-dependent phosphoribosylglycinamide formyltransferase (5'-phosphoribosylglycinamide transformylase 2) (Formate-dependent GAR transformylase) (EC 2.1.2.-) (GAR transformylase 2) (GART 2) (Non-folate glycinamide ribonucleotide transformylase) (Phosphoribosylglycinamide formyltransferase 2)	purT ASJ32_14645	OTHER	CytoplasmicMembrane	F	Involved in the de novo purine biosynthesis. Catalyzes the transfer of formate to 5-phospho-ribosyl-glycinamide (GAR), producing 5-phospho-ribosyl-N-formylglycinamide (FGAR). Formate is provided by PurU via hydrolysis of 10-formyl-tetrahydrofolate	16.9547	16.4574	16.6369	17.4067	16.2342	NaN	NaN	NaN	16.9547	16.4574	16.6369	17.4067	16.2342	13.6256	13.5343	14.3572				+	Ctrl_Extra_Fe_Extra	1.98342	0.0232071	2.4261	3.67525	38	38	38	82.9	82.9	82.9	42.171	0	323.31	5649700000	1582	A0A6N4CWR9	A0A6N4CWR9	1802
A0A6N4D070	Peptide methionine sulfoxide reductase MsrA (Protein-methionine-S-oxide reductase) (EC 1.8.4.11) (Peptide-methionine (S)-S-oxide reductase) (Peptide Met(O) reductase)	msrA ASJ32_01810	OTHER	Unknown	O	Has an important function as a repair enzyme for proteins that have been inactivated by oxidation. Catalyzes the reversible oxidation-reduction of methionine sulfoxide in proteins to methionine	14.3773	15.3115	15.0628	16.1941	NaN	NaN	NaN	NaN	14.3773	15.3115	15.0628	16.1941	12.7757	12.6677	13.3123	14.3297				+	Ctrl_Extra_Fe_Extra	1.98561	0.0232032	1.96508	3.6795	9	9	9	69	69	69	23.133	0	292.28	2687900000	563	A0A6N4D070	A0A6N4D070	2465
A0A6N4CYB5	30S ribosomal protein S3	rpsC ASJ32_10935 GO994_01175	OTHER	Cytoplasmic	J	Binds the lower part of the 30S subunit head. Binds mRNA in the 70S ribosome, positioning it for translation	21.1884	20.6381	21.4082	21.1705	20.1894	18.2322	18.9916	19.9314	21.1884	20.6381	21.4082	21.1705	20.1894	18.2322	18.9916	19.9314				+	Ctrl_Extra_Fe_Extra	1.99278	0.0228926	1.76514	3.6934	50	50	50	93.2	93.2	93.2	26.106	0	323.31	72264000000	7968	A0A6N4CYB5	A0A6N4CYB5	2121
A0A6N4CV57	Glutamate--tRNA ligase (EC 6.1.1.17) (Glutamyl-tRNA synthetase) (GluRS)	gltX ASJ32_04965	OTHER	Cytoplasmic	J	Catalyzes the attachment of glutamate to tRNA(Glu) in a two-step reaction glutamate is first activated by ATP to form Glu-AMP and then transferred to the acceptor end of tRNA(Glu)	18.2387	17.6768	18.5147	18.5726	17.7116	16.7843	16.7211	17.2255	18.2387	17.6768	18.5147	18.5726	17.7116	16.7843	16.7211	17.2255				+	Ctrl_Extra_Fe_Extra	1.99939	0.0226531	1.14006	3.70624	59	59	59	94.7	94.7	94.7	52.818	0	323.31	9640500000	3197	A0A6N4CV57	A0A6N4CV57	1456
A0A6N4CW71	Orotate phosphoribosyltransferase (OPRT) (OPRTase) (EC 2.4.2.10)	pyrE ASJ32_13765 GO994_21405	OTHER	Cytoplasmic	F	Catalyzes the transfer of a ribosyl phosphate group from 5-phosphoribose 1-diphosphate to orotate, leading to the formation of orotidine monophosphate (OMP)	14.9287	14.3378	14.6271	15.2492	NaN	NaN	NaN	NaN	14.9287	14.3378	14.6271	15.2492	13.863	13.0114	13.9999	13.8385				+	Ctrl_Extra_Fe_Extra	2.00164	0.0226363	1.10749	3.71061	19	19	19	70	70	70	23.803	0	323.31	517150000	357	A0A6N4CW71	A0A6N4CW71	1687
A0A6N4CQU9	2-dehydro-3-deoxyphosphooctonate aldolase (EC 2.5.1.55) (3-deoxy-D-manno-octulosonic acid 8-phosphate synthase) (KDO-8-phosphate synthase) (KDO 8-P synthase) (KDOPS) (Phospho-2-dehydro-3-deoxyoctonate aldolase)	kdsA ASJ32_21440	OTHER	Cytoplasmic	M	Belongs to the KdsA family	17.5716	17.7346	17.2488	17.5549	13.5261	NaN	16.0964	14.1328	17.5716	17.7346	17.2488	17.5549	13.5261	11.1767	16.0964	14.1328				+	Ctrl_Extra_Fe_Extra	2.00945	0.022301	3.79446	3.72582	41	41	41	98.6	98.6	98.6	31.089	0	323.31	10642000000	3016	A0A6N4CQU9	A0A6N4CQU9	523
A0A6N4CPI3	Aspartate-semialdehyde dehydrogenase (ASA dehydrogenase) (ASADH) (EC 1.2.1.11) (Aspartate-beta-semialdehyde dehydrogenase)	asd ASJ32_06775 GO994_10890	OTHER	Cytoplasmic	E	Catalyzes the NADPH-dependent formation of L-aspartate- semialdehyde (L-ASA) by the reductive dephosphorylation of L- aspartyl-4-phosphate	21.254	21.1744	20.7146	20.0904	19.2084	17.2809	14.5655	17.331	21.254	21.1744	20.7146	20.0904	19.2084	17.2809	14.5655	17.331				+	Ctrl_Extra_Fe_Extra	2.01739	0.0221001	3.71192	3.74133	46	46	46	91.4	91.4	91.4	40.121	0	323.31	18229000000	3222	A0A6N4CPI3	A0A6N4CPI3	285
A0A6N4CZM1	Bifunctional NAD pyrophosphatase/5'-nucleotidase (Bifunctional metallophosphatase/5'-nucleotidase)	ASJ32_00650 GO994_06095	LIPO(Sec/SPII)	Periplasmic	F	Belongs to the 5'-nucleotidase family	18.507	17.6148	16.0623	15.0701	14.0266	12.7034	14.0248	13.932	18.507	17.6148	16.0623	15.0701	14.0266	12.7034	14.0248	13.932				+	Ctrl_Extra_Fe_Extra	2.02794	0.021638	3.14182	3.76196	39	39	39	53.3	53.3	53.3	66.504	0	323.31	1605800000	1132	A0A6N4CZM1	A0A6N4CZM1	2370
A0A6N4CU58	Universal stress protein	ASJ32_13350 GO994_16260	OTHER	Cytoplasmic	/	/	15.2998	15.7916	15.2333	16.7946	NaN	NaN	NaN	NaN	15.2998	15.7916	15.2333	16.7946	14.7314	12.3307	13.5259	13.1961				+	Ctrl_Extra_Fe_Extra	2.0478	0.0207989	2.3338	3.80096	13	13	13	67.1	67.1	67.1	16.405	0	272.49	536900000	326	A0A6N4CU58	A0A6N4CU58	1234
A0A6N4CST3	Phosphoenolpyruvate-protein phosphotransferase (EC 2.7.3.9) (Phosphotransferase system, enzyme I)	ASJ32_19215	OTHER	Cytoplasmic	G	General (non sugar-specific) component of the phosphoenolpyruvate-dependent sugar phosphotransferase system (sugar PTS). This major carbohydrate active-transport system catalyzes the phosphorylation of incoming sugar substrates concomitantly with their translocation across the cell membrane. Enzyme I transfers the phosphoryl group from phosphoenolpyruvate (PEP) to the phosphoryl carrier protein (…	18.8837	19.2449	18.7506	19.274	17.8952	16.2652	15.0043	17.2174	18.8837	19.2449	18.7506	19.274	17.8952	16.2652	15.0043	17.2174				+	Ctrl_Extra_Fe_Extra	2.0545	0.0205444	2.44278	3.81417	73	73	73	88.5	88.5	88.5	63.707	0	323.31	25767000000	5797	A0A6N4CST3	A0A6N4CST3	916
A0A6N4CQV2	Branched-chain-amino-acid aminotransferase (BCAT) (EC 2.6.1.42)	ilvE ASJ32_13860	OTHER	Cytoplasmic	E	Belongs to the class-IV pyridoxal-phosphate-dependent aminotransferase family	16.0212	17.3623	16.1286	15.5773	NaN	NaN	NaN	NaN	16.0212	17.3623	16.1286	15.5773	12.4898	11.985	14.9546	13.8512				+	Ctrl_Extra_Fe_Extra	2.05564	0.0205444	2.95219	3.81641	31	31	31	84	84	84	34.384	0	323.31	3646300000	1302	A0A6N4CQV2	A0A6N4CQV2	526
A0A6N4CTR4	Phosphoglucosamine mutase (EC 5.4.2.10)	glmM ASJ32_04295	OTHER	Cytoplasmic	G	Catalyzes the conversion of glucosamine-6-phosphate to glucosamine-1-phosphate	16.2509	16.8947	16.5038	16.4691	15.8403	NaN	NaN	13.4003	16.2509	16.8947	16.5038	16.4691	15.8403	13.0906	12.6773	13.4003				+	Ctrl_Extra_Fe_Extra	2.06536	0.0201636	2.77749	3.83561	55	55	55	85.1	85.1	85.1	47.496	0	323.31	13536000000	3379	A0A6N4CTR4	A0A6N4CTR4	1149
A0A6N4CU00	30S ribosomal protein S9	rpsI ASJ32_16465 GO994_02045	OTHER	Cytoplasmic	J	Belongs to the universal ribosomal protein uS9 family	17.6292	17.7043	18.0409	18.0035	16.0027	NaN	15.6925	16.2423	17.6292	17.7043	18.0409	18.0035	16.0027	13.4478	15.6925	16.2423				+	Ctrl_Extra_Fe_Extra	2.06587	0.0201636	2.49819	3.83662	25	25	25	93.1	93.1	93.1	14.769	0	323.31	97798000000	8999	A0A6N4CU00	A0A6N4CU00	1201
A0A6N4CZQ6	UDP-glucose 4-epimerase (EC 5.1.3.2)	ASJ32_01010	OTHER	Cytoplasmic	M	UDP-glucose 4-epimerase	15.0008	15.2478	14.9067	15.8538	NaN	NaN	NaN	NaN	15.0008	15.2478	14.9067	15.8538	12.679	12.8207	14.6303	13.2913				+	Ctrl_Extra_Fe_Extra	2.07124	0.0200826	1.89695	3.84724	24	24	24	82.7	82.7	82.7	37.099	0	323.31	1059700000	518	A0A6N4CZQ6	A0A6N4CZQ6	2385
A0A6P1HAM9	Alpha-glycosidase (Maltodextrin glucosidase) (EC 3.2.1.20)	malZ ASJ32_07890 GO994_20750	OTHER	Cytoplasmic	G	Belongs to the glycosyl hydrolase 13 family	15.4527	14.1446	15.7388	14.0942	NaN	NaN	NaN	NaN	15.4527	14.1446	15.7388	14.0942	12.7025	13.5522	13.0423	12.9527				+	Ctrl_Extra_Fe_Extra	2.07451	0.0199955	1.79512	3.85373	41	41	41	65.4	65.4	65.4	69.844	0	323.31	734430000	489	A0A6P1HAM9	A0A6P1HAM9	2693
A0A6N4CY46	Histidine biosynthesis bifunctional protein HisB [Includes: Histidinol-phosphatase (EC 3.1.3.15); Imidazoleglycerol-phosphate dehydratase (IGPD) (EC 4.2.1.19)]	hisB ASJ32_12565	OTHER	Cytoplasmic	E	belongs to the histidinol- phosphatase family	15.2296	15.6122	15.3559	15.4235	NaN	NaN	NaN	NaN	15.2296	15.6122	15.3559	15.4235	13.6726	11.6302	14.335	12.8873				+	Ctrl_Extra_Fe_Extra	2.08561	0.0195535	2.27403	3.87576	31	31	31	77.5	77.5	77.5	40.854	0	323.31	1589300000	801	A0A6N4CY46	A0A6N4CY46	2078
A0A6N4CWX8	YkuD domain-containing protein	ASJ32_03500	SP(Sec/SPI)	Unknown	S	L,D-transpeptidase catalytic domain	15.6632	15.7051	14.7741	15.5402	NaN	NaN	NaN	NaN	15.6632	15.7051	14.7741	15.5402	13.0367	14.2995	14.1053	12.3527				+	Ctrl_Extra_Fe_Extra	2.08836	0.0194924	1.97209	3.88124	8	8	8	47.5	47.5	47.5	17.739	0	52.64	62489000	123	A0A6N4CWX8	A0A6N4CWX8	1841
A0A6N4CZX2	Immunogenic protein	ASJ32_01500	SP(Sec/SPI)	Extracellular	S	NMT1-like family	14.5225	14.909	15.0287	14.9586	NaN	NaN	NaN	NaN	14.5225	14.909	15.0287	14.9586	14.0836	12.7911	13.602	14.0052				+	Ctrl_Extra_Fe_Extra	2.09521	0.0192496	1.23424	3.89486	16	16	16	37.4	37.4	37.4	45.482	0	40.942	224250000	178	A0A6N4CZX2	A0A6N4CZX2	2419
A0A6N4CRQ7	Ribosome-binding ATPase YchF	ychF ASJ32_21380	OTHER	Cytoplasmic	J	ATPase that binds to both the 70S ribosome and the 50S ribosomal subunit in a nucleotide-independent manner	14.9001	15.1863	15.4855	15.4054	NaN	NaN	NaN	NaN	14.9001	15.1863	15.4855	15.4054	13.5213	11.9536	13.8605	14.0082				+	Ctrl_Extra_Fe_Extra	2.0961	0.0192496	1.90843	3.89664	42	42	42	89	89	89	39.519	0	323.31	9412600000	2157	A0A6N4CRQ7	A0A6N4CRQ7	698
A0A6N4CXD6	50S ribosomal protein L24	rplX ASJ32_10960 GO994_01200	OTHER	Cytoplasmic	J	One of the proteins that surrounds the polypeptide exit tunnel on the outside of the subunit	17.9826	17.0789	18.2648	17.6917	16.6402	NaN	NaN	NaN	17.9826	17.0789	18.2648	17.6917	16.6402	12.8391	14.5115	13.5682				+	Ctrl_Extra_Fe_Extra	2.09785	0.0192496	3.36473	3.90014	29	29	29	96.2	96.2	96.2	11.299	0	323.31	65630000000	6971	A0A6N4CXD6	A0A6N4CXD6	1928
A0A6N4CUC7	Acetate kinase (EC 2.7.2.1) (Acetokinase)	ackA ASJ32_18215 GO994_03515	OTHER	Cytoplasmic	H	Catalyzes the formation of acetyl phosphate from acetate and ATP. Can also catalyze the reverse reaction	16.2116	16.9742	16.3261	16.0836	15.5089	NaN	NaN	NaN	16.2116	16.9742	16.3261	16.0836	15.5089	13.9944	12.5962	13.2705				+	Ctrl_Extra_Fe_Extra	2.09864	0.0192496	2.55636	3.90172	30	29	29	86.5	84.2	84.2	42.553	0	323.31	1366900000	821	A0A6N4CUC7	A0A6N4CUC7	1281
A0A6N4CQI9	50S ribosomal protein L1	rplA ASJ32_07330 GO994_01665	OTHER	Cytoplasmic	J	Binds directly to 23S rRNA. The L1 stalk is quite mobile in the ribosome, and is involved in E site tRNA release	20.3975	19.5779	19.891	19.7676	17.7732	13.4058	15.2467	17.2892	20.3975	19.5779	19.891	19.7676	17.7732	13.4058	15.2467	17.2892				+	Ctrl_Extra_Fe_Extra	2.10122	0.0192331	3.97976	3.90686	45	45	45	96.1	96.1	96.1	24.603	0	323.31	159040000000	29591	A0A6N4CQI9	A0A6N4CQI9	454
A0A6N4CP51	Head protein	ASJ32_22740	OTHER	Unknown	S	Phage head completion protein (GPL)	15.8556	15.4739	15.9874	15.9644	15.164	NaN	NaN	NaN	15.8556	15.4739	15.9874	15.9644	15.164	13.4617	13.3076	12.5691				+	Ctrl_Extra_Fe_Extra	2.10281	0.0192256	2.19474	3.91003	19	19	19	92.8	92.8	92.8	16.292	0	323.31	3310700000	681	A0A6N4CP51;A0A6N4CKV9	A0A6N4CP51;A0A6N4CKV9	230
A0A6N4CYZ6	Chaperone protein HscA homolog	hscA ASJ32_01955 GO994_10215	OTHER	Cytoplasmic	O	Chaperone involved in the maturation of iron-sulfur cluster-containing proteins. Has a low intrinsic ATPase activity which is markedly stimulated by HscB	NaN	14.7563	14.5951	15.4646	NaN	NaN	NaN	NaN	14.1972	14.7563	14.5951	15.4646	13.8027	13.3741	12.4973	13.3579				+	Ctrl_Extra_Fe_Extra	2.11184	0.0188917	1.49533	3.9281	57	57	57	80.3	80.3	80.3	65.215	0	323.31	12421000000	3541	A0A6N4CYZ6	A0A6N4CYZ6	2251
A0A6N4CR36	30S ribosomal protein S7	rpsG ASJ32_07275 GO994_01720	OTHER	Cytoplasmic	J	One of the primary rRNA binding proteins, it binds directly to 16S rRNA where it nucleates assembly of the head domain of the 30S subunit. Is located at the subunit interface close to the decoding center, probably blocks exit of the E-site tRNA	19.2863	18.772	18.6275	18.9109	17.8705	16.3831	15.3563	17.1877	19.2863	18.772	18.6275	18.9109	17.8705	16.3831	15.3563	17.1877				+	Ctrl_Extra_Fe_Extra	2.11434	0.0188454	2.19978	3.9331	32	32	32	91.7	91.7	91.7	17.419	0	323.31	118970000000	13148	A0A6N4CR36	A0A6N4CR36	569
A0A6N4CRX4	10 kDa chaperonin (GroES protein) (Protein Cpn10)	groES groS ASJ32_19815	OTHER	Cytoplasmic	O	Binds to Cpn60 in the presence of Mg-ATP and suppresses the ATPase activity of the latter	14.3383	14.6313	14.9681	15.1627	NaN	NaN	NaN	NaN	14.3383	14.6313	14.9681	15.1627	13.6953	13.673	12.4617	13.6732				+	Ctrl_Extra_Fe_Extra	2.11792	0.0187528	1.39935	3.94027	24	24	24	100	100	100	10.269	0	323.31	23689000000	2894	A0A6N4CRX4	A0A6N4CRX4	732
A0A6N4CYW9	Aminopeptidase (EC 3.4.11.23)	ASJ32_01940	OTHER	Cytoplasmic	E	Probably plays an important role in intracellular peptide degradation	17.086	17.0894	16.8858	15.1938	15.1466	NaN	NaN	14.1109	17.086	17.0894	16.8858	15.1938	15.1466	12.8949	13.7631	14.1109				+	Ctrl_Extra_Fe_Extra	2.12404	0.0185514	2.58489	3.95257	32	30	30	85.9	84.1	84.1	45.767	0	323.31	8547100000	2658	A0A6N4CYW9	A0A6N4CYW9	2237
A0A6N4CRD4	Histidine ammonia-lyase (Histidase) (EC 4.3.1.3)	hutH ASJ32_06365	OTHER	Cytoplasmic	E	Aromatic amino acid lyase	18.923	19.4154	19.2987	18.2974	16.9342	NaN	NaN	15.7004	18.923	19.4154	19.2987	18.2974	16.9342	14.2538	12.1575	15.7004				+	Ctrl_Extra_Fe_Extra	2.14527	0.0177253	4.22213	3.99533	44	44	44	75.3	75.3	75.3	54.033	0	323.31	5628600000	2678	A0A6N4CRD4	A0A6N4CRD4	626
A0A6N4CPB7	Phosphate-binding protein	ASJ32_08205	SP(Sec/SPI)	CytoplasmicMembrane	P	PBP superfamily domain	15.4769	15.9193	15.1623	15.8736	NaN	NaN	NaN	NaN	15.4769	15.9193	15.1623	15.8736	13.483	14.0282	14.234	11.9473				+	Ctrl_Extra_Fe_Extra	2.14536	0.0177253	2.18489	3.9955	33	33	33	67.3	67.3	67.3	34.421	0	323.31	813420000	534	A0A6N4CPB7	A0A6N4CPB7	254
A0A6N4D066	Acetate kinase (EC 2.7.2.1) (Acetokinase)	ackA ASJ32_00105 GO994_17575	OTHER	Cytoplasmic	H	Catalyzes the formation of acetyl phosphate from acetate and ATP. Can also catalyze the reverse reaction	18.2	18.8234	18.7658	18.6849	17.8726	15.6402	16.7414	16.1067	18.2	18.8234	18.7658	18.6849	17.8726	15.6402	16.7414	16.1067				+	Ctrl_Extra_Fe_Extra	2.16011	0.0173029	2.02833	4.02537	45	45	44	99	99	96.8	43.023	0	323.31	13583000000	3333	A0A6N4D066	A0A6N4D066	2463
A0A6N4CZE0	Glutamine synthetase (EC 6.3.1.2)	glnA ASJ32_10740	OTHER	Cytoplasmic	E	glutamine synthetase	20.0958	21.1092	20.235	19.886	19.247	18.9601	19.3293	19.243	20.0958	21.1092	20.235	19.886	19.247	18.9601	19.3293	19.243				+	Ctrl_Extra_Fe_Extra	2.17099	0.0169894	1.13668	4.04746	53	53	53	99.8	99.8	99.8	51.809	0	323.31	40880000000	7627	A0A6N4CZE0	A0A6N4CZE0	2327
A0A6N4CZT6	UPF0234 protein ASJ32_01055	ASJ32_01055 GO994_06565	OTHER	Cytoplasmic	S	Belongs to the UPF0234 family	17.5025	17.4245	16.8667	16.9379	15.5787	15.864	16.3383	16.533	17.5025	17.4245	16.8667	16.9379	15.5787	15.864	16.3383	16.533				+	Ctrl_Extra_Fe_Extra	2.17425	0.0169197	1.10439	4.0541	23	23	23	85	85	85	18.192	0	323.31	1937100000	862	A0A6N4CZT6	A0A6N4CZT6	2399
A0A6N4CTK7	Aminomethyltransferase	ASJ32_17635	OTHER	Unknown	S	Chain A, Ygfz protein	14.7632	14.772	14.9852	15.2244	NaN	NaN	NaN	NaN	14.7632	14.772	14.9852	15.2244	14.051	12.997	14.2269	13.2077				+	Ctrl_Extra_Fe_Extra	2.18143	0.0166991	1.31556	4.06873	17	17	17	78.9	78.9	78.9	33.16	0	323.31	1376300000	591	A0A6N4CTK7	A0A6N4CTK7	1110
A0A6N4CR17	Succinate--CoA ligase [ADP-forming] subunit alpha (EC 6.2.1.5) (Succinyl-CoA synthetase subunit alpha) (SCS-alpha)	sucD ASJ32_06750 GO994_10865	OTHER	Cytoplasmic	C	Succinyl-CoA synthetase functions in the citric acid cycle (TCA), coupling the hydrolysis of succinyl-CoA to the synthesis of either ATP or GTP and thus represents the only step of substrate-level phosphorylation in the TCA. The alpha subunit of the enzyme binds the substrates coenzyme A and phosphate, while succinate binding and nucleotide specificity is provided by the beta subunit	18.6106	18.4652	17.9809	18.3073	17.2012	NaN	NaN	NaN	18.6106	18.4652	17.9809	18.3073	17.2012	14.5368	13.4893	13.2868				+	Ctrl_Extra_Fe_Extra	2.18607	0.0165781	3.71249	4.07821	31	31	31	97.6	97.6	97.6	29.861	0	323.31	12026000000	2982	A0A6N4CR17	A0A6N4CR17	559
A0A6N4CTK6	Phosphoenolpyruvate synthase (PEP synthase) (EC 2.7.9.2) (Pyruvate, water dikinase)	ASJ32_19495	OTHER	Cytoplasmic	H	Catalyzes the phosphorylation of pyruvate to phosphoenolpyruvate	18.9772	19.0271	19.2961	18.6987	17.4765	13.2381	13.078	15.2474	18.9772	19.0271	19.2961	18.6987	17.4765	13.2381	13.078	15.2474				+	Ctrl_Extra_Fe_Extra	2.1882	0.0165538	4.23978	4.08255	68	68	68	63	63	63	86.173	0	323.31	11452000000	4176	A0A6N4CTK6	A0A6N4CTK6	1109
A0A6N4CQS4	Glycerol dehydrogenase (Iron-containing alcohol dehydrogenase)	ASJ32_07155 GO994_11110	OTHER	Cytoplasmic	C	glycerol dehydrogenase	15.0209	15.671	15.6702	15.4381	NaN	NaN	NaN	NaN	15.0209	15.671	15.6702	15.4381	14.166	14.501	12.8901	13.1403				+	Ctrl_Extra_Fe_Extra	2.2633	0.0140214	1.77568	4.23766	23	23	23	63.7	63.7	63.7	40.535	0	323.31	1166300000	364	A0A6N4CQS4	A0A6N4CQS4	507
A0A6N4CYK7	50S ribosomal protein L22	rplV ASJ32_10930 GO994_01170	OTHER	Cytoplasmic	J	The globular domain of the protein is located near the polypeptide exit tunnel on the outside of the subunit, while an extended beta-hairpin is found that lines the wall of the exit tunnel in the center of the 70S ribosome	16.1018	15.8203	16.7419	16.1653	NaN	NaN	NaN	NaN	16.1018	15.8203	16.7419	16.1653	14.8395	12.3154	12.491	14.1285				+	Ctrl_Extra_Fe_Extra	2.27484	0.0137012	2.7637	4.26178	27	27	27	90.4	90.4	90.4	12.394	0	323.31	87017000000	9624	A0A6N4CYK7	A0A6N4CYK7	2177
A0A6N4CUI6	Delta-aminolevulinic acid dehydratase (EC 4.2.1.24)	hemB ASJ32_15275 GO994_21895	OTHER	Cytoplasmic	H	Belongs to the ALAD family	17.0718	17.4888	16.2112	14.8088	NaN	NaN	NaN	NaN	17.0718	17.4888	16.2112	14.8088	14.3292	12.0761	13.4228	12.4696				+	Ctrl_Extra_Fe_Extra	2.27809	0.0136941	3.32072	4.26859	23	23	23	66.7	66.7	66.7	37.054	0	323.31	1481200000	810	A0A6N4CUI6	A0A6N4CUI6	1318
A0A6P1H2B4	Guanylate kinase (EC 2.7.4.8) (GMP kinase)	gmk ASJ32_09425 GO994_00190	OTHER	Cytoplasmic	F	Essential for recycling GMP and indirectly, cGMP	15.2173	14.9529	15.7847	16.4387	NaN	NaN	NaN	NaN	15.2173	14.9529	15.7847	16.4387	12.466	12.8736	12.5317	14.4772				+	Ctrl_Extra_Fe_Extra	2.323	0.0124357	2.51128	4.36332	13	13	13	62	62	62	23.542	0	323.31	625580000	417	A0A6P1H2B4	A0A6P1H2B4	2543
A0A6P1H5N2	Adenosine deaminase (EC 3.5.4.4) (Adenosine aminohydrolase)	add ASJ32_10720 GO994_00965	OTHER	Cytoplasmic	F	Adenosine/AMP deaminase	14.5024	14.9321	15.1565	15.7117	NaN	NaN	NaN	NaN	14.5024	14.9321	15.1565	15.7117	12.8643	10.965	13.1597	13.1311				+	Ctrl_Extra_Fe_Extra	2.32434	0.0124357	2.54563	4.36616	27	27	27	65.2	65.2	65.2	36.455	0	168.99	1207600000	568	A0A6P1H5N2	A0A6P1H5N2	2600
A0A6N4CXI4	Dihydroorotase (EC 3.5.2.3)	ASJ32_10105 GO994_08400	OTHER	Cytoplasmic	F	Amidohydrolase family	17.6645	18.1509	17.6795	18.0102	17.0143	14.7989	15.112	14.548	17.6645	18.1509	17.6795	18.0102	17.0143	14.7989	15.112	14.548				+	Ctrl_Extra_Fe_Extra	2.32701	0.0124088	2.50797	4.37184	40	40	40	65.1	65.1	65.1	49.469	0	323.31	5531000000	1674	A0A6N4CXI4	A0A6N4CXI4	1954
A0A6N4CQK0	Methionine gamma-lyase (EC 4.4.1.11)	ASJ32_06785	OTHER	Cytoplasmic	E	Catalyzes the formation of L-homocysteine from O- succinyl-L-homoserine (OSHS) and hydrogen sulfide	18.1253	18.4932	17.9284	16.3773	15.647	15.4952	NaN	15.5717	18.1253	18.4932	17.9284	16.3773	15.647	15.4952	14.2865	15.5717				+	Ctrl_Extra_Fe_Extra	2.32887	0.0123997	2.48095	4.37579	22	22	22	58.4	58.4	58.4	40.854	0	323.31	2968000000	1073	A0A6N4CQK0	A0A6N4CQK0	462
A0A6N4CT46	4-alpha-glucanotransferase (EC 2.4.1.25) (Amylomaltase) (Disproportionating enzyme)	ASJ32_18500	OTHER	Cytoplasmic	G	4-alpha-glucanotransferase	18.3295	19.3514	18.842	18.9591	16.9389	15.2043	NaN	15.8259	18.3295	19.3514	18.842	18.9591	16.9389	15.2043	13.1977	15.8259				+	Ctrl_Extra_Fe_Extra	2.34216	0.0121557	3.57881	4.40411	51	51	51	77.5	77.5	77.5	81.038	0	323.31	3124300000	1244	A0A6N4CT46	A0A6N4CT46	994
A0A6N4CQX4	Peptidase M17	ASJ32_22145	OTHER	Cytoplasmic	E	Belongs to the peptidase M17 family	15.1419	14.5649	14.8645	15.1427	NaN	NaN	NaN	NaN	15.1419	14.5649	14.8645	15.1427	13.2859	13.7769	12.0186	11.7905				+	Ctrl_Extra_Fe_Extra	2.34296	0.0121557	2.21054	4.40581	20	20	20	48.2	48.2	48.2	54.556	0	323.31	430710000	404	A0A6N4CQX4	A0A6N4CQX4	538
A0A6N4CRM1	Succinate--CoA ligase [ADP-forming] subunit beta (EC 6.2.1.5) (Succinyl-CoA synthetase subunit beta) (SCS-beta)	sucC ASJ32_06745 GO994_10860	OTHER	Cytoplasmic	C	Succinyl-CoA synthetase functions in the citric acid cycle (TCA), coupling the hydrolysis of succinyl-CoA to the synthesis of either ATP or GTP and thus represents the only step of substrate-level phosphorylation in the TCA. The beta subunit provides nucleotide specificity of the enzyme and binds the substrate succinate, while the binding sites for coenzyme A and phosphate are found in the alpha …	19.3172	19.528	19.0812	19.4677	18.6848	17.2178	16.9202	17.4976	19.3172	19.528	19.0812	19.4677	18.6848	17.2178	16.9202	17.4976				+	Ctrl_Extra_Fe_Extra	2.35399	0.0120017	1.76844	4.4294	51	51	51	76.8	76.8	76.8	41.406	0	323.31	21429000000	3830	A0A6N4CRM1	A0A6N4CRM1	681
A0A6N4CRD9	D-alanine--D-alanine ligase (EC 6.3.2.4) (D-Ala-D-Ala ligase) (D-alanylalanine synthetase)	ddl ASJ32_07215	OTHER	Cytoplasmic	F	Cell wall formation	15.6123	15.9272	15.9728	16.2488	NaN	NaN	NaN	NaN	15.6123	15.9272	15.9728	16.2488	13.1073	12.3502	14.7155	14.059				+	Ctrl_Extra_Fe_Extra	2.35832	0.0119264	2.38228	4.43867	18	18	18	51.4	51.4	51.4	36.361	0	323.31	703270000	261	A0A6N4CRD9	A0A6N4CRD9	630
A0A6N4CZP5	Phosphate acetyltransferase (EC 2.3.1.8) (Phosphotransacetylase)	ASJ32_00100	SP(Sec/SPI)	Cytoplasmic	C	belongs to the CobB CobQ family	15.3866	16.2517	16.3887	16.5545	NaN	NaN	NaN	NaN	15.3866	16.2517	16.3887	16.5545	14.8811	12.7414	14.1084	13.6639				+	Ctrl_Extra_Fe_Extra	2.36009	0.0119215	2.29668	4.44246	81	81	81	80.8	80.8	80.8	77.621	0	323.31	33836000000	7097	A0A6N4CZP5	A0A6N4CZP5	2381
A0A6N4CRB1	Transcription antitermination protein NusB (Antitermination factor NusB)	nusB ASJ32_04395 GO994_05140	OTHER	Cytoplasmic	K	Involved in transcription antitermination. Required for transcription of ribosomal RNA (rRNA) genes. Binds specifically to the boxA antiterminator sequence of the ribosomal RNA (rrn) operons	17.1948	17.2409	17.1586	17.5429	16.3886	15.0111	15.2787	16.1718	17.1948	17.2409	17.1586	17.5429	16.3886	15.0111	15.2787	16.1718				+	Ctrl_Extra_Fe_Extra	2.40339	0.0108702	1.57174	4.53596	18	18	18	75.2	75.2	75.2	15.805	0	323.31	2494900000	897	A0A6N4CRB1	A0A6N4CRB1	611
A0A6P1H471	Ribosomal RNA large subunit methyltransferase M (EC 2.1.1.186) (23S rRNA (cytidine2498-2'-O)-methyltransferase) (23S rRNA 2'-O-ribose methyltransferase RlmM)	rlmM ASJ32_01170 GO994_06680	OTHER	Cytoplasmic	J	Belongs to the class I-like SAM-binding methyltransferase superfamily. RNA methyltransferase RlmE family. RlmM subfamily	14.8085	14.8097	14.476	15.2602	NaN	NaN	NaN	NaN	14.8085	14.8097	14.476	15.2602	13.8244	12.5708	13.42	12.241				+	Ctrl_Extra_Fe_Extra	2.4115	0.0107087	1.82455	4.5536	32	32	32	65.7	65.7	65.7	42.229	0	323.31	3730400000	1260	A0A6P1H471	A0A6P1H471	2578
A0A6P1H3C1	CoA-disulfide reductase (EC 1.8.1.14)	ASJ32_07515 GO994_01465	OTHER	Cytoplasmic	P	Pyridine nucleotide-disulphide oxidoreductase, dimerisation domain	14.7804	15.0669	15.4141	14.0324	NaN	NaN	NaN	NaN	14.7804	15.0669	15.4141	14.0324	13.3607	13.2148	13.7196	13.0534				+	Ctrl_Extra_Fe_Extra	2.41192	0.0107087	1.48634	4.55452	26	26	26	59	59	59	47.372	0	323.31	681680000	448	A0A6P1H3C1	A0A6P1H3C1	2560
A0A6P1H7A3	Oligoribonuclease (EC 3.1.-.-)	orn ASJ32_05000 GO994_04470	OTHER	Cytoplasmic	L	3'-to-5' exoribonuclease specific for small oligoribonucleotides	16.8248	17.1551	17.1311	17.7551	NaN	NaN	NaN	NaN	16.8248	17.1551	17.1311	17.7551	15.5256	11.5908	12.8565	13.5011				+	Ctrl_Extra_Fe_Extra	2.41413	0.0107087	3.84802	4.55934	22	22	22	70.2	70.2	70.2	20.95	0	260.22	602420000	298	A0A6P1H7A3	A0A6P1H7A3	2631
A0A6N4CQ10	Triosephosphate isomerase (TIM) (TPI) (EC 5.3.1.1) (Triose-phosphate isomerase)	tpiA ASJ32_21315 GO994_12310	OTHER	Cytoplasmic	G	Involved in the gluconeogenesis. Catalyzes stereospecifically the conversion of dihydroxyacetone phosphate (DHAP) to D-glyceraldehyde-3-phosphate (G3P)	21.7153	21.9448	21.8502	21.5668	20.5703	18.624	17.6949	19.1111	21.7153	21.9448	21.8502	21.5668	20.5703	18.624	17.6949	19.1111				+	Ctrl_Extra_Fe_Extra	2.41947	0.0106327	2.76917	4.57097	30	30	30	100	100	100	25.972	0	323.31	20487000000	4439	A0A6N4CQ10	A0A6N4CQ10	369
A0A6N4D0S1	UDP-glucose 6-dehydrogenase (EC 1.1.1.22)	ASJ32_00575 GO994_06005	SP(Sec/SPI)	Cytoplasmic	M	Belongs to the UDP-glucose GDP-mannose dehydrogenase family	14.4565	14.6677	14.7273	15.3009	NaN	NaN	NaN	NaN	14.4565	14.6677	14.7273	15.3009	13.2644	13.7688	13.7597	14.0005				+	Ctrl_Extra_Fe_Extra	2.42345	0.0106154	1.08971	4.57967	55	55	55	92.2	92.2	92.2	49.388	0	323.31	12101000000	2961	A0A6N4D0S1	A0A6N4D0S1	2528
A0A6P1H7M8	dCTP deaminase (EC 3.5.4.13) (Deoxycytidine triphosphate deaminase)	dcd ASJ32_12745 GO994_11695	OTHER	Cytoplasmic	F	Belongs to the dCTP deaminase family	15.4143	15.7995	15.1668	16.1	NaN	NaN	NaN	NaN	15.4143	15.7995	15.1668	16.1	13.9779	14.6229	13.4702	13.0097				+	Ctrl_Extra_Fe_Extra	2.42845	0.0105337	1.85002	4.59062	20	20	20	69.4	69.4	69.4	21.362	0	323.31	662910000	410	A0A6P1H7M8	A0A6P1H7M8	2638
A0A6N4CQ89	Lactate dehydrogenase (EC 1.1.1.28)	ASJ32_07870	OTHER	Cytoplasmic	C	Belongs to the D-isomer specific 2-hydroxyacid dehydrogenase family	14.7992	14.964	15.0996	15.1441	NaN	NaN	NaN	NaN	14.7992	14.964	15.0996	15.1441	14.1184	13.6989	12.7391	13.7768				+	Ctrl_Extra_Fe_Extra	2.45045	0.0100517	1.41845	4.63892	36	36	36	86.9	86.9	86.9	36.26	0	323.31	2781200000	893	A0A6N4CQ89	A0A6N4CQ89	413
A0A6N4CUA6	Uncharacterized protein	ASJ32_04935	SP(Sec/SPI)	Periplasmic	G	protein contain chitin-binding domain type 3	19.4516	18.7217	18.5973	18.9692	17.9098	15.9023	16.5013	15.8702	19.4516	18.7217	18.5973	18.9692	17.9098	15.9023	16.5013	15.8702				+	Ctrl_Extra_Fe_Extra	2.45778	0.00992121	2.38905	4.6551	44	44	44	53.3	53.3	53.3	106.75	0	323.31	334170000	734	A0A6N4CUA6	A0A6N4CUA6	1265
A0A6N4CUM6	MBL fold metallo-hydrolase	ASJ32_17270 GO994_05860	SP(Sec/SPI)	Unknown	S	COG0491 Zn-dependent hydrolases, including glyoxylases	15.7529	15.4805	15.2963	15.0274	NaN	NaN	NaN	NaN	15.7529	15.4805	15.2963	15.0274	13.3173	12.4056	14.3156	12.3086				+	Ctrl_Extra_Fe_Extra	2.46614	0.00976959	2.3025	4.67357	15	15	15	56.6	56.6	56.6	31.129	0	87.235	47545000	81	A0A6N4CUM6	A0A6N4CUM6	1346
A0A6N4CVT7	Dihydroxy-acid dehydratase (DAD) (EC 4.2.1.9)	ilvD ASJ32_13865 GO994_21300	OTHER	Cytoplasmic	E	Belongs to the IlvD Edd family	23.9208	23.6686	23.5634	24.2904	20.8229	NaN	NaN	NaN	23.9208	23.6686	23.5634	24.2904	20.8229	13.7789	13.4564	13.8541				+	Ctrl_Extra_Fe_Extra	2.46924	0.00973748	8.38271	4.68045	65	65	65	77	77	77	65.115	0	323.31	23812000000	4691	A0A6N4CVT7	A0A6N4CVT7	1606
A0A6N4CYU8	Nucleoside diphosphate kinase (NDK) (NDP kinase) (EC 2.7.4.6) (Nucleoside-2-P kinase)	ndk ASJ32_01935 GO994_10235	OTHER	Cytoplasmic	F	Major role in the synthesis of nucleoside triphosphates other than ATP. The ATP gamma phosphate is transferred to the NDP beta phosphate via a ping-pong mechanism, using a phosphorylated active-site intermediate	18.0137	18.9003	18.2446	18.9761	15.9948	15.8828	NaN	14.2098	18.0137	18.9003	18.2446	18.9761	15.9948	15.8828	12.6848	14.2098				+	Ctrl_Extra_Fe_Extra	2.47173	0.00971945	3.8406	4.68595	17	17	17	62.7	62.7	62.7	15.429	0	323.31	9389700000	1836	A0A6N4CYU8	A0A6N4CYU8	2225
A0A6N4CQ01	Peptide chain release factor 1 (RF-1)	prfA ASJ32_21420 GO994_16985	OTHER	Cytoplasmic	J	Peptide chain release factor 1 directs the termination of translation in response to the peptide chain termination codons UAG and UAA	13.8674	14.5688	13.4809	14.1811	NaN	NaN	NaN	NaN	13.8674	14.5688	13.4809	14.1811	13.0752	12.7322	12.9144	12.8367				+	Ctrl_Extra_Fe_Extra	2.47224	0.00971945	1.13492	4.68708	38	38	38	88.4	88.4	88.4	40.801	0	323.31	2095900000	943	A0A6N4CQ01	A0A6N4CQ01	364
A0A6P1H7Y4	Ribulose-phosphate 3-epimerase (EC 5.1.3.1)	rpe ASJ32_17340 GO994_05930	OTHER	Cytoplasmic	G	Belongs to the ribulose-phosphate 3-epimerase family	15.2186	16.3006	15.2635	15.3738	NaN	NaN	NaN	NaN	15.2186	16.3006	15.2635	15.3738	14.4186	13.2478	12.7974	12.5603				+	Ctrl_Extra_Fe_Extra	2.47803	0.00965422	2.28314	4.69994	19	19	19	65.2	65.2	65.2	24.398	0	262.14	3204300000	448	A0A6P1H7Y4	A0A6P1H7Y4	2643
A0A6N4CWE1	DNAse	ASJ32_12840	OTHER	Cytoplasmic	L	TatD related DNase	14.295	15.1136	14.609	15.0081	NaN	NaN	NaN	NaN	14.295	15.1136	14.609	15.0081	13.8774	13.2262	13.6106	12.876				+	Ctrl_Extra_Fe_Extra	2.47857	0.00965422	1.35888	4.70115	16	16	16	54.8	54.8	54.8	28.712	0	281.34	316620000	272	A0A6N4CWE1	A0A6N4CWE1	1724
A0A6N4CT82	Ribose-5-phosphate isomerase A (EC 5.3.1.6) (Phosphoriboisomerase A) (PRI)	rpiA ASJ32_19565 GO994_08020	OTHER	Cytoplasmic	G	Catalyzes the reversible conversion of ribose-5- phosphate to ribulose 5-phosphate	16.7994	16.9256	16.9435	17.4833	NaN	NaN	NaN	NaN	16.7994	16.9256	16.9435	17.4833	13.3652	12.5477	15.6877	12.8599				+	Ctrl_Extra_Fe_Extra	2.48138	0.00965422	3.42285	4.70739	28	28	28	76	76	76	23.01	0	323.31	3178100000	662	A0A6N4CT82	A0A6N4CT82	1019
A0A6N4D011	Chaperone SurA (Peptidyl-prolyl cis-trans isomerase SurA) (PPIase SurA) (EC 5.2.1.8) (Rotamase SurA)	surA ASJ32_00370 GO994_17310	SP(Sec/SPI)	Periplasmic	M	Chaperone involved in the correct folding and assembly of outer membrane proteins. Recognizes specific patterns of aromatic residues and the orientation of their side chains, which are found more frequently in integral outer membrane proteins. May act in both early periplasmic and late outer membrane-associated steps of protein maturation	18.957	19.1014	18.6044	18.4345	16.4571	NaN	NaN	NaN	18.957	19.1014	18.6044	18.4345	16.4571	10.9521	13.1138	12.7962				+	Ctrl_Extra_Fe_Extra	2.48158	0.00965422	5.44452	4.70784	76	76	76	91.4	91.4	91.4	47.903	0	323.31	14299000000	4066	A0A6N4D011	A0A6N4D011	2442
A0A6N4CQM8	MSHA biogenesis protein MshQ	ASJ32_06295	SP(Sec/SPI)	Unknown	U	calcium- and calmodulin-responsive adenylate cyclase activity	15.6392	16.6602	15.4514	16.2428	14.5781	14.3845	NaN	13.3292	15.6392	16.6602	15.4514	16.2428	14.5781	14.3845	13.2159	13.3292				+	Ctrl_Extra_Fe_Extra	2.4923	0.00949057	2.12147	4.7317	28	28	28	31.6	31.6	31.6	129.99	0	323.31	190780000	383	A0A6N4CQM8	A0A6N4CQM8	479
A0A6P1H7C9	Bifunctional protein FolD [Includes: Methylenetetrahydrofolate dehydrogenase (EC 1.5.1.5); Methenyltetrahydrofolate cyclohydrolase (EC 3.5.4.9)]	folD ASJ32_11870 GO994_13080	OTHER	Cytoplasmic	F	Catalyzes the oxidation of 5,10- methylenetetrahydrofolate to 5,10-methenyltetrahydrofolate and then the hydrolysis of 5,10-methenyltetrahydrofolate to 10- formyltetrahydrofolate	15.916	16.8202	17.1526	17.485	14.9987	NaN	NaN	14.495	15.916	16.8202	17.1526	17.485	14.9987	13.3341	12.7088	14.495				+	Ctrl_Extra_Fe_Extra	2.4983	0.00939766	2.95931	4.7451	21	21	21	77.4	77.4	77.4	30.811	0	323.31	4896900000	1153	A0A6P1H7C9	A0A6P1H7C9	2634
A0A6N4CW83	UDP-N-acetylmuramoyl-tripeptide--D-alanyl-D-alanine ligase (EC 6.3.2.10) (D-alanyl-D-alanine-adding enzyme)	murF ASJ32_15130 GO994_02350	OTHER	Cytoplasmic	M	Involved in cell wall formation. Catalyzes the final step in the synthesis of UDP-N-acetylmuramoyl-pentapeptide, the precursor of murein	14.9616	15.0358	15.2916	15.2529	NaN	NaN	NaN	NaN	14.9616	15.0358	15.2916	15.2529	13.5712	12.4434	13.9418	13.85				+	Ctrl_Extra_Fe_Extra	2.50048	0.00938788	1.68389	4.74998	26	26	26	59.4	59.4	59.4	47.759	0	323.31	1585200000	706	A0A6N4CW83	A0A6N4CW83	1694
A0A6N4CXF1	Amidophosphoribosyltransferase (ATase) (EC 2.4.2.14) (Glutamine phosphoribosylpyrophosphate amidotransferase) (GPATase)	purF ASJ32_11790 GO994_12990	OTHER	Cytoplasmic	F	Catalyzes the formation of phosphoribosylamine from phosphoribosylpyrophosphate (PRPP) and glutamine	16.4142	16.8331	16.9101	17.3213	15.667	NaN	NaN	NaN	16.4142	16.8331	16.9101	17.3213	15.667	13.331	13.1507	13.2204				+	Ctrl_Extra_Fe_Extra	2.50137	0.00938788	3.02737	4.75198	54	54	54	75.9	75.9	75.9	56.213	0	323.31	21999000000	5110	A0A6N4CXF1	A0A6N4CXF1	1938
A0A6N4CQ26	Carbamoyl-phosphate synthase large chain (EC 6.3.5.5) (Carbamoyl-phosphate synthetase ammonia chain)	carB ASJ32_19535	LIPO(Sec/SPII)	Unknown	F	Carbamoyl-phosphate synthetase ammonia chain	19.0082	18.6363	19.1109	19.1777	18.035	16.0754	16.1086	16.5116	19.0082	18.6363	19.1109	19.1777	18.035	16.0754	16.1086	16.5116				+	Ctrl_Extra_Fe_Extra	2.53249	0.00882686	2.30059	4.82191	131	131	131	79.7	79.7	79.7	117.76	0	323.31	69500000000	13559	A0A6N4CQ26	A0A6N4CQ26	376
A0A6N4CTR1	Arginine ABC transporter substrate-binding protein	ASJ32_03695	SP(Sec/SPI)	Periplasmic	ET	belongs to the bacterial solute-binding protein 3 family	17.1595	17.7934	17.316	17.8979	15.6855	NaN	NaN	NaN	17.1595	17.7934	17.316	17.8979	15.6855	14.4654	12.6155	12.7089				+	Ctrl_Extra_Fe_Extra	2.53289	0.00882686	3.67287	4.82283	20	20	20	80.8	80.8	80.8	27.03	0	323.31	563070000	362	A0A6N4CTR1	A0A6N4CTR1	1148
A0A6N4CPD7	Transketolase (EC 2.2.1.1)	tkt ASJ32_08400 GO994_16825	OTHER	Cytoplasmic	G	Catalyzes the transfer of a two-carbon ketol group from a ketose donor to an aldose acceptor, via a covalent intermediate with the cofactor thiamine pyrophosphate	20.1609	20.1634	19.9855	20.2252	17.4999	12.3819	12.1997	14.4317	20.1609	20.1634	19.9855	20.2252	17.4999	12.3819	12.1997	14.4317				+	Ctrl_Extra_Fe_Extra	2.55295	0.00852407	6.00543	4.86827	76	76	76	87.2	87.2	87.2	71.623	0	323.31	82146000000	10998	A0A6N4CPD7	A0A6N4CPD7	263
A0A6N4CUU3	Fructose-1,6-bisphosphatase class 1 (FBPase class 1) (EC 3.1.3.11) (D-fructose-1,6-bisphosphate 1-phosphohydrolase class 1)	fbp ASJ32_16900 GO994_08630	OTHER	Unknown	G	D-fructose-1,6-bisphosphate 1-phosphohydrolase class 1	16.0905	15.4986	16.1588	16.0495	NaN	NaN	NaN	NaN	16.0905	15.4986	16.1588	16.0495	13.5567	13.1888	14.8349	12.6447				+	Ctrl_Extra_Fe_Extra	2.56098	0.00840231	2.39307	4.88654	44	44	44	77.6	77.6	77.6	37.997	0	323.31	4804200000	1570	A0A6N4CUU3	A0A6N4CUU3	1396
A0A6N4CZE6	Glutathione reductase (Glutathione-disulfide reductase) (EC 1.8.1.7)	gorA ASJ32_09500 GO994_00115	OTHER	Cytoplasmic	C	Belongs to the class-I pyridine nucleotide-disulfide oxidoreductase family	16.7542	17.2267	16.2116	15.2975	NaN	NaN	NaN	NaN	16.7542	17.2267	16.2116	15.2975	13.6377	12.2795	13.8318	14.2076				+	Ctrl_Extra_Fe_Extra	2.56156	0.00840231	2.88333	4.88785	34	34	34	66.8	66.8	66.8	48.568	0	323.31	2518200000	1172	A0A6N4CZE6	A0A6N4CZE6	2330
A0A6N4CW86	Histidine biosynthesis bifunctional protein HisIE [Includes: Phosphoribosyl-AMP cyclohydrolase (PRA-CH) (EC 3.5.4.19); Phosphoribosyl-ATP pyrophosphatase (PRA-PH) (EC 3.6.1.31)]	hisI hisIE ASJ32_12530 GO994_11920	OTHER	Cytoplasmic	E	Belongs to the PRA-CH family	15.4058	15.7032	15.7396	15.8865	NaN	NaN	NaN	NaN	15.4058	15.7032	15.7396	15.8865	13.9809	12.4734	14.4139	13.457				+	Ctrl_Extra_Fe_Extra	2.56281	0.00840231	2.10246	4.89071	15	15	15	57.8	57.8	57.8	23.046	0	323.31	1925200000	844	A0A6N4CW86	A0A6N4CW86	1697
A0A6N4CTL4	Uncharacterized protein	ASJ32_02415	OTHER	Unknown	S	Protein of unknown function, DUF	15.2926	15.9205	15.9786	14.907	NaN	NaN	NaN	NaN	15.2926	15.9205	15.9786	14.907	14.2823	12.5718	13.4129	13.0735				+	Ctrl_Extra_Fe_Extra	2.5867	0.00801816	2.18958	4.94535	15	15	15	93.3	93.3	93.3	12.887	0	323.31	210900000	152	A0A6N4CTL4	A0A6N4CTL4	1116
A0A6N4CT91	Diaminopimelate decarboxylase (DAP decarboxylase) (DAPDC) (EC 4.1.1.20)	lysA ASJ32_05180	OTHER	Cytoplasmic	E	Specifically catalyzes the decarboxylation of meso- diaminopimelate (meso-DAP) to L-lysine	15.3801	15.2425	16.2616	16.5177	NaN	NaN	NaN	NaN	15.3801	15.2425	16.2616	16.5177	14.3734	12.9183	13.8402	13.5151				+	Ctrl_Extra_Fe_Extra	2.60186	0.00777562	2.1887	4.98022	44	44	44	92.8	92.8	92.8	45.298	0	323.31	4840100000	1672	A0A6N4CT91	A0A6N4CT91	1027
A0A6N4CTD3	Uncharacterized protein	ASJ32_19455	SP(Sec/SPI)	CytoplasmicMembrane	P	NLPA lipoprotein	17.9948	17.9232	17.7692	17.7638	15.3822	NaN	NaN	14.9919	17.9948	17.9232	17.7692	17.7638	15.3822	12.024	13.9344	14.9919				+	Ctrl_Extra_Fe_Extra	2.61707	0.00753946	3.77962	5.0154	24	24	24	76.1	76.1	76.1	30.038	0	323.31	2143900000	1099	A0A6N4CTD3	A0A6N4CTD3	1055
A0A6N4CTM4	Glycerol kinase (EC 2.7.1.30) (ATP:glycerol 3-phosphotransferase) (Glycerokinase) (GK)	glpK ASJ32_02465 GO994_09685	OTHER	Cytoplasmic	F	Key enzyme in the regulation of glycerol uptake and metabolism. Catalyzes the phosphorylation of glycerol to yield sn- glycerol 3-phosphate	15.8188	16.2838	15.8783	15.4191	NaN	NaN	NaN	NaN	15.8188	16.2838	15.8783	15.4191	14.3276	13.0394	13.5946	14.5682				+	Ctrl_Extra_Fe_Extra	2.62243	0.00751006	1.96757	5.02784	35	35	35	70.8	70.8	70.8	55.492	0	323.31	424960000	460	A0A6N4CTM4	A0A6N4CTM4	1123
A0A6N4CVS0	30S ribosomal protein S8	rpsH ASJ32_10975 GO994_01215	OTHER	Cytoplasmic	J	One of the primary rRNA binding proteins, it binds directly to 16S rRNA central domain where it helps coordinate assembly of the platform of the 30S subunit	16.6436	16.5052	17.0888	16.6804	15.0175	NaN	NaN	NaN	16.6436	16.5052	17.0888	16.6804	15.0175	11.7352	13.1522	13.2542				+	Ctrl_Extra_Fe_Extra	2.6235	0.00751006	3.43973	5.03032	29	29	29	100	100	100	14.001	0	323.31	84827000000	11698	A0A6N4CVS0	A0A6N4CVS0	1593
A0A6P1H2K4	S-formylglutathione hydrolase (EC 3.1.2.12)	fghA ASJ32_10440 GO994_00705	OTHER	Unknown	S	Serine hydrolase involved in the detoxification of formaldehyde	16.8069	17.4114	17.6389	16.69	15.6195	NaN	NaN	NaN	16.8069	17.4114	17.6389	16.69	15.6195	13.3281	13.7664	12.8848				+	Ctrl_Extra_Fe_Extra	2.62378	0.00751006	3.23712	5.03097	17	17	17	63.7	63.7	63.7	31.001	0	323.31	650210000	393	A0A6P1H2K4	A0A6P1H2K4	2550
A0A6N4CR11	DUF1311 domain-containing protein	ASJ32_20630 GO994_03590	LIPO(Sec/SPII)	Unknown	S	protein conserved in bacteria	14.7871	15.3723	15.9526	16.4853	NaN	NaN	NaN	NaN	14.7871	15.3723	15.9526	16.4853	13.4803	11.9926	13.1802	13.5584				+	Ctrl_Extra_Fe_Extra	2.62604	0.00751006	2.59648	5.03622	22	22	22	80.8	80.8	80.8	21.481	0	323.31	1126800000	506	A0A6N4CR11	A0A6N4CR11	557
A0A6N4CXC2	3-oxoacyl-[acyl-carrier-protein] synthase 2 (EC 2.3.1.179)	fabF ASJ32_12815 GO994_11630	SP(Sec/SPI)	CytoplasmicMembrane	I	Catalyzes the condensation reaction of fatty acid synthesis by the addition to an acyl acceptor of two carbons from malonyl-ACP	17.6832	16.6071	16.3545	16.1814	NaN	NaN	NaN	NaN	17.6832	16.6071	16.3545	16.1814	13.6088	11.2133	13.7447	13.8271				+	Ctrl_Extra_Fe_Extra	2.63184	0.0074759	3.60808	5.0497	24	24	24	76.5	76.5	76.5	43.161	0	323.31	5053200000	2331	A0A6N4CXC2	A0A6N4CXC2	1921
A0A6N4CV13	Acetylornithine aminotransferase (ACOAT) (EC 2.6.1.11)	astC argD ASJ32_17365 GO994_05955	OTHER	Cytoplasmic	E	acetylornithine aminotransferase	19.6002	20.0863	19.7444	19.1842	18.513	17.1329	16.52	17.0207	19.6002	20.0863	19.7444	19.1842	18.513	17.1329	16.52	17.0207				+	Ctrl_Extra_Fe_Extra	2.63611	0.00743475	2.3571	5.05965	52	52	51	84.2	84.2	83.5	43.398	0	323.31	10792000000	2464	A0A6N4CV13	A0A6N4CV13	1430
A0A6N4CVG9	Deoxyribose-phosphate aldolase (DERA) (EC 4.1.2.4) (2-deoxy-D-ribose 5-phosphate aldolase) (Phosphodeoxyriboaldolase) (Deoxyriboaldolase)	deoC ASJ32_15650 GO994_18545	OTHER	Cytoplasmic	F	Catalyzes a reversible aldol reaction between acetaldehyde and D-glyceraldehyde 3-phosphate to generate 2-deoxy- D-ribose 5-phosphate	15.3553	14.6956	15.1825	14.8	NaN	NaN	NaN	NaN	15.3553	14.6956	15.1825	14.8	14.1157	12.9953	12.963	12.6015				+	Ctrl_Extra_Fe_Extra	2.63839	0.0074279	1.83949	5.06498	19	19	19	76.7	76.7	76.7	27.403	0	238.3	357840000	314	A0A6N4CVG9	A0A6N4CVG9	1527
A0A6N4CVB2	Phosphoenolpyruvate carboxylase (PEPC) (PEPCase) (EC 4.1.1.31)	ppc ASJ32_03300 GO994_20700	OTHER	Cytoplasmic	H	Forms oxaloacetate, a four-carbon dicarboxylic acid source for the tricarboxylic acid cycle	18.8176	18.3626	19.4561	19.2399	17.8588	16.4478	16.8366	16.844	18.8176	18.3626	19.4561	19.2399	17.8588	16.4478	16.8366	16.844				+	Ctrl_Extra_Fe_Extra	2.65327	0.00724073	1.97226	5.09976	110	110	110	86.2	86.2	86.2	99.047	0	323.31	25478000000	6112	A0A6N4CVB2	A0A6N4CVB2	1491
A0A6N4CZA8	Biosynthetic arginine decarboxylase (ADC) (EC 4.1.1.19)	speA ASJ32_02605	OTHER	Unknown	H	Catalyzes the biosynthesis of agmatine from arginine	19.4915	19.7011	19.9192	19.3502	18.3797	16.0457	16.2414	16.5932	19.4915	19.7011	19.9192	19.3502	18.3797	16.0457	16.2414	16.5932				+	Ctrl_Extra_Fe_Extra	2.65788	0.00719587	2.8005	5.11057	48	48	48	74.1	74.1	74.1	70.262	0	323.31	15883000000	4836	A0A6N4CZA8	A0A6N4CZA8	2312
A0A6P1HB89	tRNA (guanine-N(1)-)-methyltransferase (EC 2.1.1.228) (M1G-methyltransferase) (tRNA [GM37] methyltransferase)	trmD ASJ32_03755 GO994_18395	OTHER	Cytoplasmic	J	Belongs to the RNA methyltransferase TrmD family	17.028	16.6841	16.6211	16.0784	15.1466	NaN	NaN	NaN	17.028	16.6841	16.6211	16.0784	15.1466	14.0217	13.935	12.8605				+	Ctrl_Extra_Fe_Extra	2.67693	0.00694828	2.61198	5.15541	22	22	22	65.1	65.1	65.1	27.703	0	323.31	1664800000	590	A0A6P1HB89	A0A6P1HB89	2698
A0A6N4CUM3	DUF3299 domain-containing protein	ASJ32_17545 GO994_03740	SP(Sec/SPI)	Unknown	S	Protein of unknown function (DUF3299)	14.7347	15.1154	15.2412	15.3466	NaN	NaN	NaN	NaN	14.7347	15.1154	15.2412	15.3466	14.1842	12.8577	12.6946	12.6562				+	Ctrl_Extra_Fe_Extra	2.687	0.00681927	2.01131	5.17923	11	11	11	47.8	47.8	47.8	17.342	0	175.38	328950000	305	A0A6N4CUM3	A0A6N4CUM3	1344
A0A6P1H6Z1	Phosphoglycolate phosphatase (PGP) (PGPase) (EC 3.1.3.18)	ASJ32_17345 GO994_05935	OTHER	Cytoplasmic	G	haloacid dehalogenase-like hydrolase	16.821	16.5883	16.5236	16.077	NaN	NaN	NaN	NaN	16.821	16.5883	16.5236	16.077	15.0947	13.2361	13.1784	14.3463				+	Ctrl_Extra_Fe_Extra	2.69505	0.00672411	2.53866	5.19831	12	12	12	52.3	52.3	52.3	24.451	0	323.31	426060000	339	A0A6P1H6Z1	A0A6P1H6Z1	2623
A0A6N4CTD2	Collagenase	ASJ32_05395 GO994_19485	SP(Sec/SPI)	Extracellular	E	COG3291 FOG PKD repeat	23.3129	23.5002	23.1883	23.1155	21.3054	21.0989	19.0572	19.3162	23.3129	23.5002	23.1883	23.1155	21.3054	21.0989	19.0572	19.3162				+	Ctrl_Extra_Fe_Extra	2.70126	0.00665856	3.08481	5.21306	79	79	79	68.2	68.2	68.2	103.48	0	323.31	6478200000	5601	A0A6N4CTD2	A0A6N4CTD2	1054
A0A6N4CTQ1	Transcription termination/antitermination protein NusA	nusA ASJ32_04265 GO994_05265	OTHER	Cytoplasmic	K	Participates in both transcription termination and antitermination	15.396	15.9867	16.0343	16.53	NaN	NaN	NaN	NaN	15.396	15.9867	16.0343	16.53	14.6433	13.4408	12.6793	13.3736				+	Ctrl_Extra_Fe_Extra	2.70699	0.00660853	2.45249	5.22671	64	64	64	66.8	66.8	66.8	55.369	0	323.31	34848000000	5537	A0A6N4CTQ1	A0A6N4CTQ1	1142
A0A6N4CZJ4	50S ribosomal protein L15	rplO ASJ32_10995 GO994_01240	OTHER	Cytoplasmic	J	Binds to the 23S rRNA	16.247	16.1566	16.5368	16.2265	NaN	NaN	NaN	NaN	16.247	16.1566	16.5368	16.2265	13.9152	11.7665	12.8882	14.3651				+	Ctrl_Extra_Fe_Extra	2.70871	0.00660853	3.058	5.23081	32	32	32	95.2	95.2	95.2	15.048	0	323.31	77863000000	8104	A0A6N4CZJ4	A0A6N4CZJ4	2356
A0A6N4CS90	ATP-dependent Zn protease	ASJ32_21065	LIPO(Sec/SPII)	Unknown	O	Putative ATP-dependant zinc protease	16.4801	15.1437	16.3376	15.0006	NaN	NaN	NaN	NaN	16.4801	15.1437	16.3376	15.0006	13.7435	12.8542	13.2075	13.7717				+	Ctrl_Extra_Fe_Extra	2.71613	0.00660481	2.34628	5.24854	33	33	33	88.2	88.2	88.2	29.499	0	323.31	5165300000	2094	A0A6N4CS90	A0A6N4CS90	798
A0A6N4CVM3	Peptidase M16	ASJ32_03995	SP(Sec/SPI)	Unknown	S	Insulinase (Peptidase family M16)	21.3244	20.9297	21.1318	20.3044	19.2991	17.9782	18.6825	19.3952	21.3244	20.9297	21.1318	20.3044	19.2991	17.9782	18.6825	19.3952				+	Ctrl_Extra_Fe_Extra	2.7264	0.00648856	2.08381	5.27312	123	123	123	88.3	88.3	88.3	102.85	0	323.31	19183000000	7063	A0A6N4CVM3	A0A6N4CVM3	1560
A0A6N4CP08	UDP-N-acetylglucosamine 1-carboxyvinyltransferase (EC 2.5.1.7) (Enoylpyruvate transferase) (UDP-N-acetylglucosamine enolpyruvyl transferase) (EPT)	murA ASJ32_16305	OTHER	Cytoplasmic	M	Cell wall formation. Adds enolpyruvyl to UDP-N- acetylglucosamine	15.2792	15.5904	15.2225	16.0921	NaN	NaN	NaN	NaN	15.2792	15.5904	15.2225	16.0921	14.493	13.403	13.0648	13.2358				+	Ctrl_Extra_Fe_Extra	2.72643	0.00648856	1.99691	5.2732	40	40	40	85.4	85.4	85.4	44.31	0	323.31	3656400000	1566	A0A6N4CP08	A0A6N4CP08	214
A0A6N4CUD1	Phosphopentomutase (EC 5.4.2.7) (Phosphodeoxyribomutase)	deoB ASJ32_15660	SP(Sec/SPI)	Cytoplasmic	G	Phosphotransfer between the C1 and C5 carbon atoms of pentose	14.8101	14.845	15.528	15.4065	NaN	NaN	NaN	NaN	14.8101	14.845	15.528	15.4065	13.088	12.7183	14.1278	13.1577				+	Ctrl_Extra_Fe_Extra	2.73599	0.00640648	1.87443	5.29615	25	25	25	64.2	64.2	64.2	43.61	0	217.31	2001800000	617	A0A6N4CUD1	A0A6N4CUD1	1283
A0A6P1HBQ0	Cysteine synthase (EC 2.5.1.47)	cysK ASJ32_19225 GO994_16540	OTHER	Cytoplasmic	E	Belongs to the cysteine synthase cystathionine beta- synthase family	21.1825	20.8337	20.4659	20.061	18.0163	16.1184	15.5606	13.896	21.1825	20.8337	20.4659	20.061	18.0163	16.1184	15.5606	13.896				+	Ctrl_Extra_Fe_Extra	2.76499	0.00604944	4.73796	5.36622	45	45	45	96.3	96.3	96.3	34.305	0	323.31	16404000000	5021	A0A6P1HBQ0	A0A6P1HBQ0	2708
A0A6N4CU34	L-aspartate oxidase (EC 1.4.3.16)	nadB ASJ32_17650 GO994_03855	OTHER	Unknown	H	Catalyzes the oxidation of L-aspartate to iminoaspartate	15.6477	15.5894	16.0357	16.6659	NaN	NaN	NaN	NaN	15.6477	15.5894	16.0357	16.6659	13.2505	13.5526	13.3202	14.7171				+	Ctrl_Extra_Fe_Extra	2.77392	0.00598305	2.27458	5.38793	40	40	40	69.3	69.3	69.3	59.572	0	323.31	6546900000	2331	A0A6N4CU34	A0A6N4CU34	1219
A0A6P1H784	Aspartate-semialdehyde dehydrogenase (ASA dehydrogenase) (ASADH) (EC 1.2.1.11) (Aspartate-beta-semialdehyde dehydrogenase)	asd ASJ32_19440 GO994_13485	OTHER	Cytoplasmic	E	Catalyzes the NADPH-dependent formation of L-aspartate- semialdehyde (L-ASA) by the reductive dephosphorylation of L- aspartyl-4-phosphate	16.5146	18.4365	16.8815	16.3375	NaN	NaN	NaN	NaN	16.5146	18.4365	16.8815	16.3375	14.691	13.0876	13.858	12.8712				+	Ctrl_Extra_Fe_Extra	2.78087	0.00591632	3.41561	5.40487	26	26	26	70.7	70.7	70.7	36.868	0	323.31	5136300000	1203	A0A6P1H784	A0A6P1H784	2629
A0A6N4CQC9	Fumarate hydratase class I (EC 4.2.1.2)	ASJ32_07055	OTHER	Cytoplasmic	C	Catalyzes the reversible hydration of fumarate to (S)- malate	17.0977	16.5783	16.9356	16.8395	NaN	NaN	NaN	NaN	17.0977	16.5783	16.9356	16.8395	13.5769	11.9459	14.7512	14.0551				+	Ctrl_Extra_Fe_Extra	2.78361	0.00590757	3.28048	5.41155	51	51	51	79.1	79.1	79.1	54.444	0	323.31	3362700000	1650	A0A6N4CQC9	A0A6N4CQC9	431
A0A6N4CW80	Pyruvate kinase (EC 2.7.1.40)	ASJ32_14125	OTHER	Cytoplasmic	G	Belongs to the pyruvate kinase family	17.8842	17.8078	17.6632	17.9968	16.024	NaN	NaN	14.9336	17.8842	17.8078	17.6632	17.9968	16.024	13.5333	13.4601	14.9336				+	Ctrl_Extra_Fe_Extra	2.78713	0.00588839	3.35024	5.42014	56	56	56	87.3	87.3	87.3	51.531	0	323.31	12669000000	3517	A0A6N4CW80	A0A6N4CW80	1691
A0A6N4CUN3	Fructose-bisphosphate aldolase (FBP aldolase) (EC 4.1.2.13)	ASJ32_17595	OTHER	Cytoplasmic	G	aldolase	21.4621	20.5022	21.0885	21.3065	19.0862	16.9122	16.7039	18.3097	21.4621	20.5022	21.0885	21.3065	19.0862	16.9122	16.7039	18.3097				+	Ctrl_Extra_Fe_Extra	2.81742	0.00557276	3.33686	5.49456	36	36	36	76.9	76.9	76.9	38.933	0	323.31	61958000000	7171	A0A6N4CUN3	A0A6N4CUN3	1352
A0A6N4CT76	Hypoxanthine phosphoribosyltransferase (EC 2.4.2.8)	hpt ASJ32_18570 GO994_17830	OTHER	Cytoplasmic	F	Belongs to the purine pyrimidine phosphoribosyltransferase family	17.3395	17.3844	17.9394	17.4122	15.7533	NaN	NaN	NaN	17.3395	17.3844	17.9394	17.4122	15.7533	13.1911	12.8529	13.2984				+	Ctrl_Extra_Fe_Extra	2.81823	0.00557276	3.74497	5.49654	23	23	23	96.6	96.6	96.6	19.623	0	323.31	2933800000	1052	A0A6N4CT76	A0A6N4CT76	1015
A0A6N4CUV0	NAD(P)H-flavin reductase (EC 1.16.1.3) (EC 1.5.1.41)	fre fadI ASJ32_15335 GO994_21835	OTHER	Cytoplasmic	C	Oxidoreductase NAD-binding domain	15.2805	15.9913	15.6694	16.6872	NaN	NaN	NaN	NaN	15.2805	15.9913	15.6694	16.6872	14.1845	13.9303	14.4549	13.9173				+	Ctrl_Extra_Fe_Extra	2.82524	0.00552779	1.78535	5.51389	13	13	13	56	56	56	26.367	0	155.11	405090000	148	A0A6N4CUV0	A0A6N4CUV0	1399
A0A6N4CT87	Probable phosphatase ASJ32_14100 (EC 3.1.3.-)	ASJ32_14100	OTHER	Cytoplasmic	E	zinc ion binding	15.2334	16.1662	15.5177	15.0107	NaN	NaN	NaN	NaN	15.2334	16.1662	15.5177	15.0107	12.2695	13.8794	13.1021	13.3962				+	Ctrl_Extra_Fe_Extra	2.82616	0.00552779	2.32021	5.51615	16	16	16	72.4	72.4	72.4	27.254	0	83.523	763240000	530	A0A6N4CT87	A0A6N4CT87	1023
A0A6N4CMZ7	Uroporphyrinogen decarboxylase (UPD) (URO-D) (EC 4.1.1.37)	hemE ASJ32_18545	OTHER	Cytoplasmic	H	Catalyzes the decarboxylation of four acetate groups of uroporphyrinogen-III to yield coproporphyrinogen-III	15.9209	15.1053	15.7904	15.8361	NaN	NaN	NaN	NaN	15.9209	15.1053	15.7904	15.8361	12.7533	10.0898	12.4688	12.6636				+	Ctrl_Extra_Fe_Extra	2.82823	0.00552779	3.6693	5.52129	21	21	21	67.6	67.6	67.6	39.49	0	323.31	1159300000	554	A0A6N4CMZ7	A0A6N4CMZ7	135
A0A6N4CXT2	Phosphoserine aminotransferase (EC 2.6.1.52) (Phosphohydroxythreonine aminotransferase) (PSAT)	serC ASJ32_11100 GO994_14015	OTHER	Cytoplasmic	E	Catalyzes the reversible conversion of 3- phosphohydroxypyruvate to phosphoserine and of 3-hydroxy-2-oxo-4- phosphonooxybutanoate to phosphohydroxythreonine	18.7906	19.2695	19.0476	18.7432	18.0061	17.034	16.6183	16.7393	18.7906	19.2695	19.0476	18.7432	18.0061	17.034	16.6183	16.7393				+	Ctrl_Extra_Fe_Extra	2.82823	0.00552779	1.8633	5.52129	48	48	48	85.6	85.6	85.6	39.535	0	323.31	11859000000	4063	A0A6N4CXT2	A0A6N4CXT2	2016
A0A6N4CUH6	Uncharacterized protein	ASJ32_17415	SP(Sec/SPI)	Unknown	-	-	15.9921	16.7046	14.8546	15.2104	NaN	NaN	NaN	NaN	15.9921	16.7046	14.8546	15.2104	13.2047	13.6314	13.2459	12.7844				+	Ctrl_Extra_Fe_Extra	2.82846	0.00552779	2.47378	5.52184	15	15	15	32.9	32.9	32.9	66.137	0	206.7	40698000	120	A0A6N4CUH6	A0A6N4CUH6	1310
A0A6N4CSR2	Leucine ABC transporter substrate-binding protein	ASJ32_15390	SP(Sec/SPI)	Periplasmic	E	Leucine ABC transporter subunit substrate-binding protein LivK	20.9089	20.4445	19.6601	19.3455	16.5239	15.5043	14.9179	17.7157	20.9089	20.4445	19.6601	19.3455	16.5239	15.5043	14.9179	17.7157				+	Ctrl_Extra_Fe_Extra	2.82851	0.00552779	3.92431	5.52197	40	40	40	86.6	86.6	86.6	38.954	0	323.31	2767200000	1136	A0A6N4CSR2	A0A6N4CSR2	902
A0A6N4CQP3	ATP-dependent 6-phosphofructokinase (ATP-PFK) (Phosphofructokinase) (EC 2.7.1.11) (Phosphohexokinase)	pfkA ASJ32_21310 GO994_12315	OTHER	Cytoplasmic	F	Catalyzes the phosphorylation of D-fructose 6-phosphate to fructose 1,6-bisphosphate by ATP, the first committing step of glycolysis	18.7123	18.7795	18.9187	18.6119	18.1143	17.2237	17.366	17.706	18.7123	18.7795	18.9187	18.6119	18.1143	17.2237	17.366	17.706				+	Ctrl_Extra_Fe_Extra	2.83174	0.00552779	1.1531	5.52999	35	35	35	83	83	83	34.753	0	323.31	19015000000	3975	A0A6N4CQP3	A0A6N4CQP3	487
A0A6N4CP13	Elongation factor Tu (EF-Tu)	tuf ASJ32_07355 GO994_01640 GO994_01730	OTHER	Cytoplasmic	J	This protein promotes the GTP-dependent binding of aminoacyl-tRNA to the A-site of ribosomes during protein biosynthesis	20.9371	20.2391	20.4783	21.2125	18.3717	15.9152	15.716	17.5629	20.9371	20.2391	20.4783	21.2125	18.3717	15.9152	15.716	17.5629				+	Ctrl_Extra_Fe_Extra	2.86851	0.00526551	3.82529	5.62172	72	72	72	99.7	99.7	99.7	43.299	0	323.31	321450000000	37690	A0A6N4CP13	A0A6N4CP13	216
A0A6N4CRK3	Catalase-peroxidase (CP) (EC 1.11.1.21) (Peroxidase/catalase)	katG ASJ32_05355	OTHER	Cytoplasmic	P	Bifunctional enzyme with both catalase and broad- spectrum peroxidase activity	15.0597	15.2144	14.912	15.3796	NaN	NaN	NaN	NaN	15.0597	15.2144	14.912	15.3796	12.6859	13.5083	14.015	13.6254				+	Ctrl_Extra_Fe_Extra	2.88631	0.00509644	1.68277	5.66649	63	63	63	83.3	83.3	83.3	77.262	0	323.31	8505700000	2481	A0A6N4CRK3	A0A6N4CRK3	670
A0A6P1HE59	ADP-L-glycero-D-manno-heptose-6-epimerase (EC 5.1.3.20) (ADP-L-glycero-beta-D-manno-heptose-6-epimerase) (ADP-glyceromanno-heptose 6-epimerase) (ADP-hep 6-epimerase) (AGME)	rfaD hldD ASJ32_13720 GO994_21475	OTHER	Cytoplasmic	GM	Catalyzes the interconversion between ADP-D-glycero- beta-D-manno-heptose and ADP-L-glycero-beta-D-manno-heptose via an epimerization at carbon 6 of the heptose	18.3194	17.9157	18.3159	18.0049	16.1063	NaN	NaN	13.7218	18.3194	17.9157	18.3159	18.0049	16.1063	14.8434	13.2482	13.7218				+	Ctrl_Extra_Fe_Extra	2.88694	0.00509644	3.65902	5.66809	40	40	40	100	100	100	36.32	0	323.31	9850200000	2835	A0A6P1HE59	A0A6P1HE59	2733
A0A6N4CU63	Octaprenyl diphosphate synthase	ASJ32_00290	OTHER	Cytoplasmic	H	Belongs to the FPP GGPP synthase family	15.1825	15.6289	15.398	16.1131	NaN	NaN	NaN	NaN	15.1825	15.6289	15.398	16.1131	13.9961	12.6142	13.7628	12.7093				+	Ctrl_Extra_Fe_Extra	2.8875	0.00509644	2.31003	5.66951	20	20	20	67.8	67.8	67.8	35.722	0	323.31	1037400000	501	A0A6N4CU63	A0A6N4CU63	1237
A0A6N4CWK7	Phosphonate ABC transporter substrate-binding protein	ASJ32_13815	SP(Sec/SPI)	Periplasmic	P	ABC transporter, phosphonate, periplasmic substrate-binding protein	18.1551	18.2934	18.0501	17.573	14.573	NaN	NaN	15.0497	18.1551	18.2934	18.0501	17.573	14.573	11.6901	12.9922	15.0497				+	Ctrl_Extra_Fe_Extra	2.88876	0.00509644	4.44164	5.67268	28	28	28	76.9	76.9	76.9	30.515	0	323.31	1149800000	604	A0A6N4CWK7	A0A6N4CWK7	1763
A0A6N4CTT9	Two-component system response regulator	ASJ32_02785	OTHER	Cytoplasmic	K	response regulator	14.8424	15.6167	14.6872	15.6402	NaN	NaN	NaN	NaN	14.8424	15.6167	14.6872	15.6402	12.7389	13.1522	13.8479	12.7598				+	Ctrl_Extra_Fe_Extra	2.91485	0.00493955	2.07193	5.73886	18	18	18	81.6	81.6	81.6	23.533	0	323.31	277550000	173	A0A6N4CTT9	A0A6N4CTT9	1163
A0A6N4CZG6	Flavodoxin	ASJ32_03015	OTHER	Cytoplasmic	C	Low-potential electron donor to a number of redox enzymes	16.68	15.9887	15.9712	16.1735	NaN	NaN	NaN	NaN	16.68	15.9887	15.9712	16.1735	13.0263	13.1983	12.0938	14.4917				+	Ctrl_Extra_Fe_Extra	2.92542	0.00484723	3.00081	5.76585	10	10	10	53.4	53.4	53.4	19.494	0	323.31	977410000	657	A0A6N4CZG6	A0A6N4CZG6	2340
A0A6N4CL49	Helix-turn-helix domain-containing protein (XRE family transcriptional regulator)	ASJ32_08070 GO994_15235	OTHER	Unknown	K	Helix-turn-helix	14.5716	14.8463	14.9364	14.7913	NaN	NaN	NaN	NaN	14.5716	14.8463	14.9364	14.7913	13.2852	13.5098	12.1353	13.029				+	Ctrl_Extra_Fe_Extra	2.92869	0.00484723	1.79659	5.77419	14	14	13	69.3	69.3	69.3	9.6472	0	310.59	2806200000	1048	A0A6N4CL49	A0A6N4CL49	50
A0A6N4CT53	UDP-N-acetylmuramate--L-alanyl-gamma-D-glutamyl-meso-2,6-diaminoheptandioate ligase (EC 6.3.2.45) (Murein peptide ligase) (UDP-N-acetylmuramate:L-alanyl-gamma-D-glutamyl-meso-diaminopimelate ligase)	mpl ASJ32_18555 GO994_17845	SP(Sec/SPI)	Cytoplasmic	M	Reutilizes the intact tripeptide L-alanyl-gamma-D- glutamyl-meso-diaminopimelate by linking it to UDP-N- acetylmuramate	15.3896	15.7175	16.4357	16.3799	NaN	NaN	NaN	NaN	15.3896	15.7175	16.4357	16.3799	13.0991	14.1656	14.076	12.8569				+	Ctrl_Extra_Fe_Extra	2.93036	0.00484723	2.43127	5.77848	27	27	27	68.9	68.9	68.9	50.314	0	323.31	3210200000	1014	A0A6N4CT53	A0A6N4CT53	1000
A0A6N4CTD8	Xanthine-guanine phosphoribosyltransferase (XGPRT) (EC 2.4.2.22) (Xanthine phosphoribosyltransferase)	gpt ASJ32_04860 GO994_04650	OTHER	Cytoplasmic	F	Acts on guanine, xanthine and to a lesser extent hypoxanthine	17.8349	17.3945	17.3834	17.448	15.7214	NaN	NaN	NaN	17.8349	17.3945	17.3834	17.448	15.7214	12.9749	13.6783	13.7647				+	Ctrl_Extra_Fe_Extra	2.94252	0.00476482	3.48037	5.80967	19	19	19	71	71	71	17.396	0	323.31	4812700000	1320	A0A6N4CTD8	A0A6N4CTD8	1059
A0A6N4CTR9	Ribosome maturation factor RimM	rimM ASJ32_03750 GO994_18400	OTHER	Cytoplasmic	J	An accessory protein needed during the final step in the assembly of 30S ribosomal subunit, possibly for assembly of the head region. Probably interacts with S19. Essential for efficient processing of 16S rRNA. May be needed both before and after RbfA during the maturation of 16S rRNA. It has affinity for free ribosomal 30S subunits but not for 70S ribosomes	14.5017	14.4176	14.6157	14.5579	NaN	NaN	NaN	NaN	14.5017	14.4176	14.6157	14.5579	12.8775	11.8475	13.1231	13.1182				+	Ctrl_Extra_Fe_Extra	2.9444	0.00476482	1.78164	5.8145	16	16	16	60.7	60.7	60.7	19.337	0	250.88	1516700000	388	A0A6N4CTR9	A0A6N4CTR9	1153
A0A6N4CX28	Amino acid ABC transporter substrate-binding protein	ASJ32_12205	SP(Sec/SPI)	Periplasmic	ET	Ligated ion channel L-glutamate- and glycine-binding site	19.6255	20.1169	19.3863	19.3543	18.6005	18.3246	18.1674	18.5977	19.6255	20.1169	19.3863	19.3543	18.6005	18.3246	18.1674	18.5977				+	Ctrl_Extra_Fe_Extra	2.9452	0.00476482	1.1982	5.81655	32	32	32	73.5	73.5	73.5	29.038	0	323.31	5672300000	1456	A0A6N4CX28	A0A6N4CX28	1873
A0A6N4CZP7	Sulfurtransferase	ASJ32_02015 GO994_10155	OTHER	Cytoplasmic	P	Rhodanese Homology Domain	15.3677	14.8084	15.2931	15.7555	NaN	NaN	NaN	NaN	15.3677	14.8084	15.2931	15.7555	12.3165	13.3981	13.7868	12.6373				+	Ctrl_Extra_Fe_Extra	2.94831	0.00476482	2.27148	5.82457	13	13	13	95.1	95.1	95.1	13.982	0	233.31	720350000	543	A0A6N4CZP7	A0A6N4CZP7	2382
A0A6N4CT52	Phosphoenolpyruvate carboxykinase (ATP) (PCK) (PEP carboxykinase) (PEPCK) (EC 4.1.1.49)	pckA ASJ32_05640	OTHER	Cytoplasmic	H	Involved in the gluconeogenesis. Catalyzes the conversion of oxaloacetate (OAA) to phosphoenolpyruvate (PEP) through direct phosphoryl transfer between the nucleoside triphosphate and OAA	19.3757	19.2414	18.3344	17.5037	15.536	13.2045	NaN	13.2283	19.3757	19.2414	18.3344	17.5037	15.536	13.2045	11.8126	13.2283				+	Ctrl_Extra_Fe_Extra	2.95094	0.00476482	5.16845	5.83133	73	73	73	91.1	91.1	91.1	59.795	0	323.31	6524600000	2492	A0A6N4CT52	A0A6N4CT52	999
A0A6N4CTM0	Recombination-associated protein RdgC	rdgC ASJ32_19170 GO994_16595	OTHER	Cytoplasmic	L	May be involved in recombination	15.7904	15.8804	16.1946	15.9763	NaN	NaN	NaN	NaN	15.7904	15.8804	16.1946	15.9763	14.6749	14.227	13.1106	13.7948				+	Ctrl_Extra_Fe_Extra	2.95291	0.00476482	2.00861	5.83642	34	34	27	84.2	84.2	75.9	33.775	0	323.31	7963800000	2043	A0A6N4CTM0	A0A6N4CTM0	1120
A0A6P1H2J3	DNA polymerase I (EC 2.7.7.7)	polA ASJ32_19130 GO994_00630	OTHER	Unknown	L	In addition to polymerase activity, this DNA polymerase exhibits 5'-3' exonuclease activity	25.9092	25.4417	26.2772	25.3424	23.1242	19.726	21.1528	21.7485	25.9092	25.4417	26.2772	25.3424	23.1242	19.726	21.1528	21.7485				+	Ctrl_Extra_Fe_Extra	2.95498	0.00476482	4.30472	5.84175	112	112	112	95.2	95.2	95.2	101.62	0	323.31	28278000000	8179	A0A6P1H2J3	A0A6P1H2J3	2548
A0A6N4CRH9	tRNA-specific 2-thiouridylase MnmA (EC 2.8.1.13)	mnmA ASJ32_21500 GO994_07840	OTHER	Cytoplasmic	J	Catalyzes the 2-thiolation of uridine at the wobble position (U34) of tRNA, leading to the formation of s(2)U34	16.2564	15.8687	16.5413	16.3975	NaN	NaN	NaN	NaN	16.2564	15.8687	16.5413	16.3975	12.9742	11.9041	14.4653	12.8876				+	Ctrl_Extra_Fe_Extra	2.96129	0.00475007	3.20816	5.85807	39	39	39	78.8	78.8	78.8	41.421	0	323.31	1833800000	919	A0A6N4CRH9	A0A6N4CRH9	655
A0A6N4CY33	Phosphoribosylformylglycinamidine synthase (FGAM synthase) (FGAMS) (EC 6.3.5.3) (Formylglycinamide ribonucleotide amidotransferase) (FGAR amidotransferase) (FGAR-AT)	purL ASJ32_01880	OTHER	Cytoplasmic	F	Phosphoribosylformylglycinamidine synthase involved in the purines biosynthetic pathway. Catalyzes the ATP-dependent conversion of formylglycinamide ribonucleotide (FGAR) and glutamine to yield formylglycinamidine ribonucleotide (FGAM) and glutamate	19.6127	19.8484	19.7572	19.7297	17.8903	15.801	15.1918	16.4219	19.6127	19.8484	19.7572	19.7297	17.8903	15.801	15.1918	16.4219				+	Ctrl_Extra_Fe_Extra	2.96723	0.00471313	3.41077	5.87344	151	151	151	93	93	93	141.81	0	323.31	68552000000	16610	A0A6N4CY33	A0A6N4CY33	2071
A0A6N4CSL4	30S ribosomal protein S13	rpsM ASJ32_11005 GO994_01255	OTHER	Cytoplasmic	J	Located at the top of the head of the 30S subunit, it contacts several helices of the 16S rRNA. In the 70S ribosome it contacts the 23S rRNA (bridge B1a) and protein L5 of the 50S subunit (bridge B1b), connecting the 2 subunits	18.7583	18.7516	19.3358	18.8898	17.831	16.7608	17.3138	16.6664	18.7583	18.7516	19.3358	18.8898	17.831	16.7608	17.3138	16.6664				+	Ctrl_Extra_Fe_Extra	2.97988	0.0046049	1.79086	5.90629	27	27	27	84.7	84.7	84.7	13.2	0	323.31	64539000000	7987	A0A6N4CSL4	A0A6N4CSL4	873
A0A6N4CV35	Copper chaperone PCu(A)C (Transporter)	ASJ32_15820 GO994_18725	SP(Sec/SPI)	Periplasmic	S	Copper chaperone PCu(A)C	15.5558	16.6378	16.4292	17.1127	NaN	NaN	NaN	NaN	15.5558	16.6378	16.4292	17.1127	12.158	14.047	13.3209	13.7312				+	Ctrl_Extra_Fe_Extra	2.98898	0.00453626	3.11962	5.93001	4	4	4	45.9	45.9	45.9	15.735	0.00039494	9.3975	44153000	30	A0A6N4CV35	A0A6N4CV35	1441
A0A6N4D104	Ribosome-recycling factor (RRF) (Ribosome-releasing factor)	frr ASJ32_01305 GO994_06815	OTHER	Cytoplasmic	J	Responsible for the release of ribosomes from messenger RNA at the termination of protein biosynthesis. May increase the efficiency of translation by recycling ribosomes from one round of translation to another	19.794	20.1131	19.5906	19.5914	16.3545	NaN	NaN	15.916	19.794	20.1131	19.5906	19.5914	16.3545	12.7393	14.5701	15.916				+	Ctrl_Extra_Fe_Extra	2.99037	0.00453626	4.8773	5.93363	46	46	46	100	100	100	20.667	0	323.31	10683000000	1981	A0A6N4D104	A0A6N4D104	2536
A0A6N4CUG9	Glutamyl-tRNA amidotransferase	ASJ32_17795	OTHER	Cytoplasmic	S	Yqey-like protein	16.9538	16.614	17.1676	17.2592	NaN	NaN	NaN	NaN	16.9538	16.614	17.1676	17.2592	12.7785	14.563	14.2028	12.0759				+	Ctrl_Extra_Fe_Extra	2.99521	0.00453626	3.59361	5.94627	13	13	13	59.2	59.2	59.2	16.186	0	296.92	2346500000	358	A0A6N4CUG9	A0A6N4CUG9	1304
A0A6N4CWP3	Quinone oxidoreductase (Zinc-binding dehydrogenase)	ASJ32_03985 GO994_18150	OTHER	Cytoplasmic	C	Zinc-binding dehydrogenase	16.1932	16.9031	16.5063	16.2191	14.6307	NaN	NaN	NaN	16.1932	16.9031	16.5063	16.2191	14.6307	12.7567	14.1431	13.1577				+	Ctrl_Extra_Fe_Extra	3.02077	0.00431888	2.78339	6.01342	14	14	14	34.3	34.3	34.3	34.198	0	98.195	520300000	300	A0A6N4CWP3	A0A6N4CWP3	1788
A0A6N4CQR9	Putrescine-binding periplasmic protein	ASJ32_07835 GO994_20805	SP(Sec/SPI)	Periplasmic	P	Required for the activity of the bacterial periplasmic transport system of putrescine	15.1693	15.8263	15.441	15.2516	14.4275	NaN	NaN	NaN	15.1693	15.8263	15.441	15.2516	14.4275	13.9301	13.6893	13.4285				+	Ctrl_Extra_Fe_Extra	3.02337	0.00431888	1.55321	6.02028	18	18	18	62	62	62	39.698	0	323.31	507320000	392	A0A6N4CQR9	A0A6N4CQR9	504
A0A6P1HBF2	Valine--tRNA ligase (EC 6.1.1.9) (Valyl-tRNA synthetase) (ValRS)	valS ASJ32_05890 GO994_19925	OTHER	Cytoplasmic	J	amino acids such as threonine, to avoid such errors, it has a posttransfer editing activity that hydrolyzes mischarged Thr-tRNA(Val) in a tRNA-dependent manner	17.7985	17.6176	18.2037	18.5545	16.7931	15.8244	16.2631	15.8852	17.7985	17.6176	18.2037	18.5545	16.7931	15.8244	16.2631	15.8852				+	Ctrl_Extra_Fe_Extra	3.03531	0.00422826	1.85211	6.05186	121	121	121	76.8	76.8	76.8	107.89	0	323.31	17453000000	5150	A0A6P1HBF2	A0A6P1HBF2	2704
A0A6N4CS66	UTP--glucose-1-phosphate uridylyltransferase (EC 2.7.7.9) (UDP-glucose pyrophosphorylase)	ASJ32_20780	OTHER	Cytoplasmic	M	UTP-glucose-1-phosphate uridylyltransferase	16.1599	15.6696	15.4793	15.9044	NaN	NaN	NaN	NaN	16.1599	15.6696	15.4793	15.9044	13.7741	14.4003	12.8124	13.4686				+	Ctrl_Extra_Fe_Extra	3.03731	0.00422826	2.18942	6.05714	32	32	32	83.2	83.2	83.2	33.651	0	323.31	1797000000	638	A0A6N4CS66	A0A6N4CS66	785
A0A6N4CZ26	DUF2750 domain-containing protein	ASJ32_11230 GO994_14150	OTHER	Cytoplasmic	S	Protein of unknown function (DUF2750)	14.9732	14.8611	14.8864	15.702	NaN	NaN	NaN	NaN	14.9732	14.8611	14.8864	15.702	13.8366	13.0655	12.749	13.3298				+	Ctrl_Extra_Fe_Extra	3.05311	0.00410922	1.86047	6.09916	9	9	9	54.2	54.2	54.2	13.872	0	278.71	458090000	258	A0A6N4CZ26	A0A6N4CZ26	2267
A0A6N4CQ63	Arginine--tRNA ligase (EC 6.1.1.19) (Arginyl-tRNA synthetase) (ArgRS)	argS ASJ32_07705	OTHER	Cytoplasmic	J	Arginyl-tRNA synthetase	18.9634	18.8215	19.9075	19.1749	17.649	16.347	17.0384	16.4793	18.9634	18.8215	19.9075	19.1749	17.649	16.347	17.0384	16.4793				+	Ctrl_Extra_Fe_Extra	3.05541	0.00410922	2.3384	6.10528	76	76	76	88.1	88.1	88.1	64.754	0	323.31	14983000000	4284	A0A6N4CQ63	A0A6N4CQ63	396
A0A6N4CQR5	Single-stranded DNA-binding protein (SSB)	ssb ASJ32_06570 GO994_18835	OTHER	Cytoplasmic	L	Plays an important role in DNA replication, recombination and repair. Binds to ssDNA and to an array of partner proteins to recruit them to their sites of action during DNA metabolism	17.4233	17.5466	17.5635	17.756	15.8602	NaN	NaN	NaN	17.4233	17.5466	17.5635	17.756	15.8602	14.3289	14.4008	13.4832				+	Ctrl_Extra_Fe_Extra	3.06476	0.00405112	3.05405	6.13027	18	18	18	76.5	76.5	76.5	21.486	0	323.31	8379700000	1763	A0A6N4CQR5	A0A6N4CQR5	502
A0A6P1H472	Protein-methionine-sulfoxide reductase catalytic subunit MsrP (EC 1.8.5.-)	msrP ASJ32_07440 GO994_01555	TAT(Tat/SPI)	Unknown	C	Part of the MsrPQ system that repairs oxidized periplasmic proteins containing methionine sulfoxide residues (Met-O), using respiratory chain electrons. Thus protects these proteins from oxidative-stress damage caused by reactive species of oxygen and chlorine generated by the host defense mechanisms. MsrPQ is essential for the maintenance of envelope integrity under bleach stress, rescuing a wid…	15.7384	15.7872	16.1544	16.0039	NaN	NaN	NaN	NaN	15.7384	15.7872	16.1544	16.0039	14.6137	12.9998	13.0075	13.4095				+	Ctrl_Extra_Fe_Extra	3.06848	0.00404213	2.41335	6.14024	10	10	10	30.8	30.8	30.8	37.436	0	203.61	314210000	311	A0A6P1H472	A0A6P1H472	2579
A0A6N4CUT0	ATP-dependent Clp protease ATP-binding subunit ClpX	clpX ASJ32_16850	OTHER	Cytoplasmic	O	ATP-dependent specificity component of the Clp protease. It directs the protease to specific substrates. Can perform chaperone functions in the absence of ClpP	15.4499	15.7002	14.857	16.0409	13.607	NaN	NaN	NaN	15.4499	15.7002	14.857	16.0409	13.607	13.1409	13.6499	12.48				+	Ctrl_Extra_Fe_Extra	3.09368	0.00383866	2.29254	6.20806	60	60	60	93.2	93.2	93.2	46.463	0	323.31	18563000000	4422	A0A6N4CUT0	A0A6N4CUT0	1386
A0A6N4CW95	ATP phosphoribosyltransferase (ATP-PRT) (ATP-PRTase) (EC 2.4.2.17)	hisG ASJ32_12580 GO994_11870	OTHER	Cytoplasmic	F	Catalyzes the condensation of ATP and 5-phosphoribose 1- diphosphate to form N'-(5'-phosphoribosyl)-ATP (PR-ATP). Has a crucial role in the pathway because the rate of histidine biosynthesis seems to be controlled primarily by regulation of HisG enzymatic activity	19.3864	19.6414	19.7543	18.9166	16.8093	14.6266	NaN	15.0804	19.3864	19.6414	19.7543	18.9166	16.8093	14.6266	13.5122	15.0804				+	Ctrl_Extra_Fe_Extra	3.09904	0.00381607	4.41753	6.22255	42	42	42	84.2	84.2	84.2	32.595	0	323.31	15523000000	3596	A0A6N4CW95	A0A6N4CW95	1703
A0A6N4CSX0	Ketol-acid reductoisomerase (NADP(+)) (KARI) (EC 1.1.1.86) (Acetohydroxy-acid isomeroreductase) (AHIR) (Alpha-keto-beta-hydroxylacyl reductoisomerase)	ilvC ASJ32_18930	OTHER	Cytoplasmic	EH	Involved in the biosynthesis of branched-chain amino acids (BCAA). Catalyzes an alkyl-migration followed by a ketol- acid reduction of (S)-2-acetolactate (S2AL) to yield (R)-2,3- dihydroxy-isovalerate. In the isomerase reaction, S2AL is rearranged via a Mg-dependent methyl migration to produce 3- hydroxy-3-methyl-2-ketobutyrate (HMKB). In the reductase reaction, this 2-ketoacid undergoes a metal-…	21.5409	21.4914	21.6207	20.9063	19.8582	18.6207	18.0537	18.3753	21.5409	21.4914	21.6207	20.9063	19.8582	18.6207	18.0537	18.3753				+	Ctrl_Extra_Fe_Extra	3.10401	0.0038114	2.66285	6.23602	82	82	82	98.6	98.6	98.6	53.84	0	323.31	128280000000	21487	A0A6N4CSX0	A0A6N4CSX0	942
A0A6N4CTS6	Serine hydroxymethyltransferase (SHMT) (Serine methylase) (EC 2.1.2.1)	glyA ASJ32_04435 GO994_05100	OTHER	Cytoplasmic	E	Catalyzes the reversible interconversion of serine and glycine with tetrahydrofolate (THF) serving as the one-carbon carrier. This reaction serves as the major source of one-carbon groups required for the biosynthesis of purines, thymidylate, methionine, and other important biomolecules. Also exhibits THF- independent aldolase activity toward beta-hydroxyamino acids, producing glycine and aldehyd…	21.8517	21.408	21.0311	20.9295	20.0048	19.1317	18.9921	18.9268	21.8517	21.408	21.0311	20.9295	20.0048	19.1317	18.9921	18.9268				+	Ctrl_Extra_Fe_Extra	3.10958	0.00379813	2.04122	6.25111	65	65	65	77.2	77.2	77.2	45.635	0	323.31	72483000000	10477	A0A6N4CTS6	A0A6N4CTS6	1157
A0A6N4CYE5	Aldehyde dehydrogenase	ASJ32_10570	OTHER	Cytoplasmic	C	belongs to the aldehyde dehydrogenase family	16.2457	17.7803	16.2955	15.4152	NaN	NaN	NaN	NaN	16.2457	17.7803	16.2955	15.4152	13.5829	12.5545	13.1983	12.5862				+	Ctrl_Extra_Fe_Extra	3.11287	0.00379645	3.45373	6.26006	39	39	39	62.4	62.4	62.4	53.513	0	323.31	2065200000	1142	A0A6N4CYE5	A0A6N4CYE5	2138
A0A6P1HCC9	Glycine--tRNA ligase beta subunit (EC 6.1.1.14) (Glycyl-tRNA synthetase beta subunit) (GlyRS)	glyS ASJ32_15475 GO994_21640	OTHER	Cytoplasmic	J	Glycyl-tRNA synthetase beta subunit	16.1804	16.6266	16.705	17.4926	14.9507	NaN	NaN	NaN	16.1804	16.6266	16.705	17.4926	14.9507	13.7572	14.23	13.4819				+	Ctrl_Extra_Fe_Extra	3.11873	0.00379379	2.64615	6.27602	95	95	95	93.2	93.2	93.2	75.144	0	323.31	21720000000	4822	A0A6P1HCC9	A0A6P1HCC9	2716
A0A6P1H4D1	Oxygen-dependent coproporphyrinogen-III oxidase (CPO) (Coprogen oxidase) (Coproporphyrinogenase) (EC 1.3.3.3)	hemF ASJ32_10680 GO994_00915	OTHER	Cytoplasmic	H	Involved in the heme biosynthesis. Catalyzes the aerobic oxidative decarboxylation of propionate groups of rings A and B of coproporphyrinogen-III to yield the vinyl groups in protoporphyrinogen-IX	16.0359	16.6639	15.5613	14.7517	NaN	NaN	NaN	NaN	16.0359	16.6639	15.5613	14.7517	13.4039	12.7224	12.9419	13.0952				+	Ctrl_Extra_Fe_Extra	3.14281	0.00361343	2.71234	6.34189	18	18	18	65.9	65.9	65.9	34.914	0	323.31	244660000	267	A0A6P1H4D1	A0A6P1H4D1	2582
A0A6N4CQU2	Thiol:disulfide interchange protein	ASJ32_13800 GO994_21370	SP(Sec/SPI)	Periplasmic	O	Thiol disulfide interchange protein	17.2884	17.6758	17.7717	17.1948	15.5434	NaN	NaN	15.0346	17.2884	17.6758	17.7717	17.1948	15.5434	13.9341	13.7144	15.0346				+	Ctrl_Extra_Fe_Extra	3.14922	0.00358471	2.92602	6.35952	23	23	23	97	97	97	22.595	0	323.31	3442000000	1024	A0A6N4CQU2	A0A6N4CQU2	519
A0A6N4CSR4	6-carboxy-5,6,7,8-tetrahydropterin synthase (EC 4.1.2.50) (Queuosine biosynthesis protein QueD)	ASJ32_10100	OTHER	Cytoplasmic	H	6-pyruvoyl tetrahydropterin synthase	15.7035	16.0975	15.8318	15.3832	NaN	NaN	NaN	NaN	15.7035	16.0975	15.8318	15.3832	14.1275	13.8988	13.7287	12.7811				+	Ctrl_Extra_Fe_Extra	3.1661	0.00347163	2.11999	6.40613	16	16	16	48.8	48.8	48.8	32.62	0	252.63	317440000	274	A0A6N4CSR4	A0A6N4CSR4	903
A0A6N4CZA0	Uncharacterized protein	ASJ32_02910	OTHER	Unknown	S	TamB, inner membrane protein subunit of TAM complex	16.2112	19.3923	19.0972	19.5418	NaN	NaN	NaN	NaN	16.2112	19.3923	19.0972	19.5418	13.23	12.555	13.6211	13.5888				+	Ctrl_Extra_Fe_Extra	3.17352	0.00343635	5.31193	6.4267	75	75	75	61.4	61.4	61.4	137.14	0	323.31	1560200000	1025	A0A6N4CZA0	A0A6N4CZA0	2308
A0A6N4CUB2	Isocitrate dehydrogenase [NADP] (EC 1.1.1.42)	ASJ32_13635 GO994_15135	OTHER	Unknown	C	Isocitrate/isopropylmalate dehydrogenase	20.7057	20.2688	20.7966	20.7163	19.5403	18.7604	18.6747	18.3722	20.7057	20.2688	20.7966	20.7163	19.5403	18.7604	18.6747	18.3722				+	Ctrl_Extra_Fe_Extra	3.1881	0.003346	1.78497	6.46726	59	59	59	84.4	84.4	84.4	45.632	0	323.31	27465000000	5789	A0A6N4CUB2	A0A6N4CUB2	1270
A0A6N4CUF7	Enolase (EC 4.2.1.11) (2-phospho-D-glycerate hydro-lyase) (2-phosphoglycerate dehydratase)	eno ASJ32_17740 GO994_03945	OTHER	Cytoplasmic	F	Catalyzes the reversible conversion of 2- phosphoglycerate into phosphoenolpyruvate. It is essential for the degradation of carbohydrates via glycolysis	22.3271	22.4166	21.9868	21.9711	20.3462	19.2197	18.3111	19.5381	22.3271	22.4166	21.9868	21.9711	20.3462	19.2197	18.3111	19.5381				+	Ctrl_Extra_Fe_Extra	3.1889	0.003346	2.82157	6.4695	74	74	74	88	88	88	45.736	0	323.31	96301000000	18634	A0A6N4CUF7	A0A6N4CUF7	1297
A0A6N4CVT9	Oxidoreductase	ASJ32_09905 GO994_13960	OTHER	Cytoplasmic	S	Aldo/keto reductase family	15.6754	15.6279	15.8979	15.923	NaN	NaN	NaN	NaN	15.6754	15.6279	15.8979	15.923	13.6411	13.2574	13.2237	14.5805				+	Ctrl_Extra_Fe_Extra	3.19191	0.003346	2.10534	6.47789	14	14	14	52.5	52.5	52.5	33.344	0	209.13	507330000	282	A0A6N4CVT9	A0A6N4CVT9	1607
A0A6N4CSD9	M24 family metallopeptidase (X-Pro aminopeptidase)	ASJ32_05630 GO994_20185	OTHER	Cytoplasmic	E	Creatinase/Prolidase N-terminal domain	17.6589	18.3144	17.7673	17.5768	15.5659	13.0428	13.2295	13.8237	17.6589	18.3144	17.7673	17.5768	15.5659	13.0428	13.2295	13.8237				+	Ctrl_Extra_Fe_Extra	3.21439	0.00321645	3.91387	6.54092	53	53	53	83.2	83.2	83.2	67.257	0	323.31	8786500000	3781	A0A6N4CSD9	A0A6N4CSD9	829
A0A6N4CWA2	Argininosuccinate synthase (EC 6.3.4.5) (Citrulline--aspartate ligase)	argG ASJ32_03325	OTHER	Cytoplasmic	E	Belongs to the argininosuccinate synthase family. Type	17.2005	16.5434	16.8821	16.6499	14.8305	NaN	NaN	NaN	17.2005	16.5434	16.8821	16.6499	14.8305	13.9237	13.9739	12.7533				+	Ctrl_Extra_Fe_Extra	3.21504	0.00321645	2.94863	6.54273	50	50	50	81.8	81.8	81.8	45.2	0	323.31	12217000000	3253	A0A6N4CWA2	A0A6N4CWA2	1706
A0A6N4CRV7	Alpha-amylase (EC 3.2.1.1)	ASJ32_19700	SP(Sec/SPI)	Extracellular	G	Aamy_C	17.9469	18.0724	16.8437	16.5673	14.7727	14.6572	NaN	14.3708	17.9469	18.0724	16.8437	16.5673	14.7727	14.6572	15.0243	14.3708				+	Ctrl_Extra_Fe_Extra	3.21686	0.00321645	2.65129	6.54787	29	29	29	48.1	48.1	48.1	81.391	0	323.31	165680000	297	A0A6N4CRV7	A0A6N4CRV7	724
A0A6N4CY47	50S ribosomal protein L2	rplB ASJ32_10920 GO994_01160	OTHER	Cytoplasmic	J	One of the primary rRNA binding proteins. Required for association of the 30S and 50S subunits to form the 70S ribosome, for tRNA binding and peptide bond formation. It has been suggested to have peptidyltransferase activity	19.2318	18.6097	19.299	19.0478	15.4777	NaN	14.8362	16.166	19.2318	18.6097	19.299	19.0478	15.4777	13.327	14.8362	16.166				+	Ctrl_Extra_Fe_Extra	3.21717	0.00321645	4.09536	6.54874	62	62	62	92.7	92.7	92.7	29.992	0	323.31	234000000000	22505	A0A6N4CY47	A0A6N4CY47	2079
A0A6N4CNQ5	DUF1338 family protein (Succinyldiaminopimelate aminotransferase)	ASJ32_17380 GO994_05970	OTHER	Unknown	S	DUF1338	15.3426	15.9704	15.6527	16.7852	NaN	NaN	NaN	NaN	15.3426	15.9704	15.6527	16.7852	13.759	12.1383	13.028	12.8425				+	Ctrl_Extra_Fe_Extra	3.22919	0.00321452	2.99577	6.58265	18	18	18	71.7	71.7	71.7	29.579	0	319.77	387690000	302	A0A6N4CNQ5	A0A6N4CNQ5	192
A0A6N4CZF4	4-hydroxy-tetrahydrodipicolinate synthase (HTPA synthase) (EC 4.3.3.7)	dapA ASJ32_00130	SP(Sec/SPI)	Cytoplasmic	E	Catalyzes the condensation of (S)-aspartate-beta- semialdehyde (S)-ASA and pyruvate to 4-hydroxy- tetrahydrodipicolinate (HTPA)	17.0475	17.2734	17.1115	16.5713	14.7964	NaN	NaN	NaN	17.0475	17.2734	17.1115	16.5713	14.7964	13.3893	14.2026	12.6608				+	Ctrl_Extra_Fe_Extra	3.23554	0.00321452	3.23864	6.60064	21	21	21	63.7	63.7	63.7	30.879	0	323.31	844030000	470	A0A6N4CZF4	A0A6N4CZF4	2333
A0A6P1HBS0	Fructose-1,6-bisphosphatase	glpX ASJ32_06015 GO994_19215	OTHER	Cytoplasmic	G	fructose-1,6-bisphosphatase	16.202	16.0047	16.1736	16.6011	NaN	NaN	NaN	NaN	16.202	16.0047	16.1736	16.6011	13.9482	11.8895	12.1403	13.3917				+	Ctrl_Extra_Fe_Extra	3.26239	0.00305314	3.40292	6.67709	47	47	47	96.7	96.7	96.7	35.852	0	323.31	21071000000	3814	A0A6P1HBS0	A0A6P1HBS0	2710
A0A6N4CX24	Spermidine dehydrogenase	ASJ32_13545	TAT(Tat/SPI)	Cytoplasmic	Q	Spermidine dehydrogenase	18.888	18.3969	17.7571	17.9639	15.7975	13.5837	NaN	14.2619	18.888	18.3969	17.7571	17.9639	15.7975	13.5837	13.4434	14.2619				+	Ctrl_Extra_Fe_Extra	3.26853	0.0030331	3.97987	6.69466	55	55	55	85	85	85	70.805	0	323.31	1401400000	1653	A0A6N4CX24	A0A6N4CX24	1871
A0A6N4D037	Beta-N-acetylhexosaminidase (EC 3.2.1.52) (N-acetyl-beta-glucosaminidase)	ASJ32_03035	SP(Sec/SPI)	Unknown	G	COG3525 N-acetyl-beta-hexosaminidase	16.4036	16.8783	17.6184	16.4897	NaN	NaN	NaN	NaN	16.4036	16.8783	17.6184	16.4897	13.288	11.2099	11.61	13.5959				+	Ctrl_Extra_Fe_Extra	3.28147	0.00296652	4.42158	6.73184	74	74	74	75.9	75.9	75.9	96.941	0	323.31	1605500000	910	A0A6N4D037	A0A6N4D037	2452
A0A6N4CVH4	Nickel ABC transporter substrate-binding protein	ASJ32_11415	SP(Sec/SPI)	Periplasmic	E	ABC transporter substrate-binding protein	17.4277	18.0794	17.0082	17.1476	14.5989	14.0929	NaN	NaN	17.4277	18.0794	17.0082	17.1476	14.5989	14.0929	14.5742	12.6988				+	Ctrl_Extra_Fe_Extra	3.2955	0.0028943	3.42451	6.77233	26	26	26	53.6	53.6	53.6	58.009	0	229.51	239020000	298	A0A6N4CVH4	A0A6N4CVH4	1531
A0A6P1H5Q6	Glycerol-3-phosphate dehydrogenase [NAD(P)+] (EC 1.1.1.94) (NAD(P)H-dependent glycerol-3-phosphate dehydrogenase)	gpsA ASJ32_10840 GO994_01080	OTHER	Cytoplasmic	I	Glycerol-3-phosphate dehydrogenase	15.8693	15.7764	15.9571	16.7168	NaN	NaN	NaN	NaN	15.8693	15.7764	15.9571	16.7168	14.3361	13.2538	14.1167	13.96				+	Ctrl_Extra_Fe_Extra	3.30513	0.00285278	2.16325	6.80023	25	25	25	72.2	72.2	72.2	35.369	0	323.31	2400600000	744	A0A6P1H5Q6	A0A6P1H5Q6	2603
A0A6N4CUQ5	3-oxoacyl-[acyl-carrier-protein] reductase (EC 1.1.1.100)	fabG ASJ32_12805 GO994_11640	OTHER	Cytoplasmic	IQ	COG1028 Dehydrogenases with different specificities (related to short-chain alcohol dehydrogenases)	18.8566	18.2639	18.2582	18.0673	16.9505	15.8063	16.0954	16.4305	18.8566	18.2639	18.2582	18.0673	16.9505	15.8063	16.0954	16.4305				+	Ctrl_Extra_Fe_Extra	3.31046	0.00283999	2.04087	6.81572	25	25	25	94.3	94.3	94.3	25.762	0	323.31	24684000000	4081	A0A6N4CUQ5	A0A6N4CUQ5	1367
A0A6N4CR78	Uncharacterized protein	ASJ32_06045 GO994_19180	SP(Sec/SPI)	Periplasmic	S	protein conserved in bacteria	17.0093	16.9972	15.9227	16.6281	NaN	NaN	NaN	NaN	17.0093	16.9972	15.9227	16.6281	12.4357	11.9348	13.2427	14.0883				+	Ctrl_Extra_Fe_Extra	3.34741	0.0026289	3.71398	6.92383	16	16	16	62.6	62.6	62.6	20.622	0	323.31	3673900000	940	A0A6N4CR78	A0A6N4CR78	591
A0A6N4CXE4	30S ribosomal protein S11	rpsK ASJ32_11010 GO994_01260	OTHER	Cytoplasmic	J	Located on the platform of the 30S subunit, it bridges several disparate RNA helices of the 16S rRNA. Forms part of the Shine-Dalgarno cleft in the 70S ribosome	16.0067	15.6963	16.0632	15.2265	NaN	NaN	NaN	NaN	16.0067	15.6963	16.0632	15.2265	12.7386	11.995	13.6008	13.3684				+	Ctrl_Extra_Fe_Extra	3.34757	0.0026289	2.8225	6.92431	22	22	22	72.1	72.1	72.1	13.835	0	323.31	79691000000	6493	A0A6N4CXE4	A0A6N4CXE4	1933
A0A6N4CU48	Prolyl endopeptidase (Prolyl oligopeptidase family serine peptidase)	ASJ32_18420 GO994_03275	LIPO(Sec/SPII)	Periplasmic	E	Prolyl oligopeptidase, N-terminal beta-propeller domain	18.8158	18.2032	17.8436	17.2901	14.7375	NaN	NaN	NaN	18.8158	18.2032	17.8436	17.2901	14.7375	12.1403	14.0726	13.4046				+	Ctrl_Extra_Fe_Extra	3.35709	0.00261211	4.44944	6.95237	55	55	55	73.7	73.7	73.7	79.139	0	323.31	3057000000	1698	A0A6N4CU48	A0A6N4CU48	1227
A0A6N4CVP6	2,3-bisphosphoglycerate-independent phosphoglycerate mutase (BPG-independent PGAM) (Phosphoglyceromutase) (iPGM) (EC 5.4.2.12)	gpmI ASJ32_10825	OTHER	Cytoplasmic	G	Catalyzes the interconversion of 2-phosphoglycerate and 3-phosphoglycerate	19.4576	20.0238	19.6697	19.4032	17.9678	16.6196	16.6125	17.3353	19.4576	20.0238	19.6697	19.4032	17.9678	16.6196	16.6125	17.3353				+	Ctrl_Extra_Fe_Extra	3.39391	0.0024588	2.50482	7.06184	60	60	60	99.2	99.2	99.2	55.275	0	323.31	19744000000	5689	A0A6N4CVP6	A0A6N4CVP6	1576
A0A6N4CRD3	Uncharacterized protein	ASJ32_05365 GO994_19455	SP(Sec/SPI)	Unknown	/	/	17.1573	17.6776	17.2011	17.3446	15.9985	15.4751	15.4885	16.2068	17.1573	17.6776	17.2011	17.3446	15.9985	15.4751	15.4885	16.2068				+	Ctrl_Extra_Fe_Extra	3.40728	0.00240395	1.55296	7.10194	28	28	28	83.3	83.3	83.3	25.675	0	323.31	1592200000	754	A0A6N4CRD3	A0A6N4CRD3	625
A0A6N4CX15	Carboxy-terminal protease (EC 3.4.21.102)	ASJ32_13005	SP(Sec/SPI)	CytoplasmicMembrane	M	Belongs to the peptidase S41A family	18.0619	17.607	18.0468	17.7846	15.9437	NaN	15.0054	15.3865	18.0619	17.607	18.0468	17.7846	15.9437	14.1884	15.0054	15.3865				+	Ctrl_Extra_Fe_Extra	3.41854	0.00236195	2.74402	7.13585	85	85	85	90.2	90.2	90.2	74.836	0	323.31	7149400000	3509	A0A6N4CX15	A0A6N4CX15	1863
A0A6N4CR91	Probable transcriptional regulatory protein ASJ32_21040	ASJ32_21040 GO994_14275	OTHER	Unknown	K	Transcriptional regulatory protein	17.6013	17.0103	17.3014	16.8234	NaN	NaN	NaN	NaN	17.6013	17.0103	17.3014	16.8234	12.5566	12.9674	14.0836	14.6122				+	Ctrl_Extra_Fe_Extra	3.42491	0.00234708	3.62916	7.15511	16	16	16	69.5	69.5	69.5	26.177	0	323.31	3255900000	1035	A0A6N4CR91	A0A6N4CR91	600
A0A6N4CPI9	5-methyltetrahydropteroyltriglutamate--homocysteine methyltransferase (EC 2.1.1.14) (Cobalamin-independent methionine synthase) (Methionine synthase, vitamin-B12 independent isozyme)	metE ASJ32_06830	OTHER	Cytoplasmic	E	Catalyzes the transfer of a methyl group from 5- methyltetrahydrofolate to homocysteine resulting in methionine formation	20.5697	20.757	20.6077	20.648	19.1416	18.4845	17.6248	18.2406	20.5697	20.757	20.6077	20.648	19.1416	18.4845	17.6248	18.2406				+	Ctrl_Extra_Fe_Extra	3.43535	0.00231076	2.27274	7.18674	91	91	90	89.1	89.1	89.1	85.358	0	323.31	25136000000	5226	A0A6N4CPI9	A0A6N4CPI9	288
A0A6N4CUX1	Nucleotide-binding protein	ASJ32_14610	OTHER	Cytoplasmic	J	S1 domain	15.9428	15.5707	15.7232	15.4722	NaN	NaN	NaN	NaN	15.9428	15.5707	15.7232	15.4722	13.1765	12.512	12.2212	13.825				+	Ctrl_Extra_Fe_Extra	3.49373	0.00205493	2.74353	7.36575	30	30	30	74.3	74.3	74.3	32.224	0	323.31	1140200000	496	A0A6N4CUX1	A0A6N4CUX1	1409
A0A6N4D081	Elongation factor Ts (EF-Ts)	tsf ASJ32_01295 GO994_06805	OTHER	Cytoplasmic	J	Associates with the EF-Tu.GDP complex and induces the exchange of GDP to GTP. It remains bound to the aminoacyl-tRNA.EF- Tu.GTP complex up to the GTP hydrolysis stage on the ribosome	20.6614	20.8201	20.1262	20.7077	17.7056	15.3557	15.4644	16.6213	20.6614	20.8201	20.1262	20.7077	17.7056	15.3557	15.4644	16.6213				+	Ctrl_Extra_Fe_Extra	3.52929	0.00190986	4.29205	7.47655	58	58	58	96.9	96.9	96.9	31.159	0	323.31	80288000000	12281	A0A6N4D081	A0A6N4D081	2470
A0A6N4CZ32	5'-methylthioadenosine/S-adenosylhomocysteine nucleosidase (MTA/SAH nucleosidase) (MTAN) (EC 3.2.2.9) (5'-deoxyadenosine nucleosidase) (DOA nucleosidase) (dAdo nucleosidase) (5'-methylthioadenosine nucleosidase) (MTA nucleosidase) (S-adenosylhomocysteine nucleosidase) (AdoHcy nucleosidase) (SAH nucleosidase) (SRH nucleosidase)	mtnN ASJ32_02175	OTHER	Cytoplasmic	F	Catalyzes the irreversible cleavage of the glycosidic bond in both 5'-methylthioadenosine (MTA) and S- adenosylhomocysteine (SAH AdoHcy) to adenine and the corresponding thioribose, 5'-methylthioribose and S-ribosylhomocysteine, respectively	16.7512	16.8899	16.4156	16.3226	NaN	NaN	NaN	NaN	16.7512	16.8899	16.4156	16.3226	14.8211	13.8367	14.7012	13.7681				+	Ctrl_Extra_Fe_Extra	3.53134	0.00190986	2.31301	7.483	19	19	19	100	100	100	24.621	0	323.31	1831300000	697	A0A6N4CZ32	A0A6N4CZ32	2271
A0A6N4CZW0	Bifunctional chorismate mutase/prephenate dehydratase (EC 4.2.1.51) (EC 5.4.99.5) (Chorismate mutase) (Chorismate mutase-prephenate dehydratase) (Prephenate dehydratase) (p-protein)	pheA ASJ32_00905	OTHER	Cytoplasmic	E	chorismate mutase	15.6179	16.104	16.0266	16.6389	NaN	NaN	NaN	NaN	15.6179	16.104	16.0266	16.6389	13.5432	12.1892	13.5959	13.3223				+	Ctrl_Extra_Fe_Extra	3.53871	0.00190194	2.93421	7.50616	35	35	35	61.3	61.3	61.3	43.258	0	323.31	4929000000	1582	A0A6N4CZW0	A0A6N4CZW0	2414
A0A6N4CX54	tRNA 2-selenouridine synthase (EC 2.9.1.3)	mnmH selU ASJ32_12690 GO994_11760	OTHER	Cytoplasmic	H	Catalyzes the transfer of selenium from selenophosphate for conversion of 2-thiouridine to 2-selenouridine at the wobble position in tRNA	14.8986	14.4295	15.3097	14.5922	NaN	NaN	NaN	NaN	14.8986	14.4295	15.3097	14.5922	13.3566	12.7424	12.9472	13.1283				+	Ctrl_Extra_Fe_Extra	3.55265	0.00185833	1.76385	7.55011	25	25	25	70.9	70.9	70.9	41.928	0	268.88	257510000	239	A0A6N4CX54	A0A6N4CX54	1883
A0A6P1H9G3	Thymidylate synthase (TS) (TSase) (EC 2.1.1.45)	thyA ASJ32_03790 GO994_18350	OTHER	Cytoplasmic	F	Catalyzes the reductive methylation of 2'-deoxyuridine- 5'-monophosphate (dUMP) to 2'-deoxythymidine-5'-monophosphate (dTMP) while utilizing 5,10-methylenetetrahydrofolate (mTHF) as the methyl donor and reductant in the reaction, yielding dihydrofolate (DHF) as a by-product. This enzymatic reaction provides an intracellular de novo source of dTMP, an essential precursor for DNA biosynthesis	15.1571	14.6616	15.3462	15.5681	NaN	NaN	NaN	NaN	15.1571	14.6616	15.3462	15.5681	13.0675	12.6315	13.1199	11.9835				+	Ctrl_Extra_Fe_Extra	3.57189	0.00181012	2.48264	7.61114	19	19	19	58.3	58.3	58.3	29.95	0	300.7	1188700000	520	A0A6P1H9G3	A0A6P1H9G3	2674
A0A6N4CXF4	Peptidyl-prolyl cis-trans isomerase (EC 5.2.1.8)	ASJ32_00610	OTHER	Cytoplasmic	O	Peptidyl-prolyl cis-trans	17.1004	17.4776	17.5159	17.9312	NaN	NaN	NaN	NaN	17.1004	17.4776	17.5159	17.9312	13.1522	14.9077	13.9506	12.8125				+	Ctrl_Extra_Fe_Extra	3.58671	0.00176542	3.80052	7.65845	6	6	6	37.2	37.2	37.2	21.123	0	121.44	2106000000	694	A0A6N4CXF4	A0A6N4CXF4	1941
A0A6N4CZY2	Thioredoxin domain-containing protein	ASJ32_01015	SP(Sec/SPI)	Unknown	O	DSBA-like thioredoxin domain	17.7396	17.0106	17.1133	17.16	15.1143	NaN	NaN	NaN	17.7396	17.0106	17.1133	17.16	15.1143	13.7887	14.834	13.8843				+	Ctrl_Extra_Fe_Extra	3.58728	0.00176542	2.8506	7.66025	37	37	37	83.9	83.9	83.9	27.316	0	323.31	13692000000	2564	A0A6N4CZY2	A0A6N4CZY2	2426
A0A6N4CS87	Glucose-6-phosphate isomerase (GPI) (EC 5.3.1.9) (Phosphoglucose isomerase) (PGI) (Phosphohexose isomerase) (PHI)	pgi ASJ32_18935 GO994_00425	OTHER	Cytoplasmic	G	Belongs to the GPI family	19.473	19.9353	19.7071	19.2057	17.847	17.4118	17.2753	16.6197	19.473	19.9353	19.7071	19.2057	17.847	17.4118	17.2753	16.6197				+	Ctrl_Extra_Fe_Extra	3.59356	0.00176542	2.29184	7.68038	45	45	45	71	71	71	61.201	0	323.31	6772500000	2440	A0A6N4CS87	A0A6N4CS87	796
A0A6N4CY03	S-(hydroxymethyl)glutathione dehydrogenase (EC 1.1.1.284)	ASJ32_10445 GO994_00710	OTHER	Cytoplasmic	C	Belongs to the zinc-containing alcohol dehydrogenase family. Class-III subfamily	16.4019	16.7729	15.9771	16.131	14.4669	NaN	NaN	NaN	16.4019	16.7729	15.9771	16.131	14.4669	13.7964	13.7261	13.0895				+	Ctrl_Extra_Fe_Extra	3.60019	0.00176542	2.55096	7.70167	34	34	34	76.5	76.5	76.5	40.159	0	323.31	5842500000	1466	A0A6N4CY03	A0A6N4CY03	2056
A0A6N4CXA3	Ribosomal RNA large subunit methyltransferase I (EC 2.1.1.191) (23S rRNA m5C1962 methyltransferase) (rRNA (cytosine-C(5)-)-methyltransferase RlmI)	rlmI ASJ32_12710	OTHER	Cytoplasmic	J	Specifically methylates the cytosine at position 1962 (m5C1962) of 23S rRNA	15.2964	15.9118	15.8251	16.1158	NaN	NaN	NaN	NaN	15.2964	15.9118	15.8251	16.1158	13.339	12.4622	12.4935	13.7246				+	Ctrl_Extra_Fe_Extra	3.61161	0.00176542	2.78245	7.73845	45	45	45	76	76	76	44.381	0	323.31	12343000000	2573	A0A6N4CXA3	A0A6N4CXA3	1911
A0A6N4CRF3	Peptide chain release factor 2 (RF-2)	prfB ASJ32_04615	OTHER	Cytoplasmic	J	Peptide chain release factor 2 directs the termination of translation in response to the peptide chain termination codons UGA and UAA	15.7082	15.6798	15.9927	16.2312	NaN	NaN	NaN	NaN	15.7082	15.6798	15.9927	16.2312	13.1053	12.2077	13.5583	11.8428				+	Ctrl_Extra_Fe_Extra	3.61379	0.00176542	3.22446	7.74551	30	30	30	70	70	70	33.426	0	323.31	2941700000	962	A0A6N4CRF3	A0A6N4CRF3	640
A0A6N4CQQ6	C4-dicarboxylate ABC transporter substrate-binding protein	ASJ32_06510	SP(Sec/SPI)	Unknown	S	NMT1-like family	21.3923	21.2383	21.2399	20.7305	19.0852	18.6319	18.472	19.5555	21.3923	21.2383	21.2399	20.7305	19.0852	18.6319	18.472	19.5555				+	Ctrl_Extra_Fe_Extra	3.63362	0.00172731	2.21407	7.80976	45	45	45	73.7	73.7	73.7	34.433	0	323.31	10752000000	3686	A0A6N4CQQ6	A0A6N4CQQ6	495
A0A6P1H2W5	Alanine dehydrogenase (EC 1.4.1.1)	ald ASJ32_10595 GO994_00815	OTHER	Cytoplasmic	C	Belongs to the AlaDH PNT family	15.8038	15.549	15.8703	15.1725	NaN	NaN	NaN	NaN	15.8038	15.549	15.8703	15.1725	13.6226	12.4926	13.5292	12.9068				+	Ctrl_Extra_Fe_Extra	3.66826	0.00166135	2.46111	7.92312	27	27	27	69.3	69.3	69.3	38.839	0	323.31	1754600000	1088	A0A6P1H2W5	A0A6P1H2W5	2554
A0A6P1H8M4	Succinyl-diaminopimelate desuccinylase (SDAP desuccinylase) (EC 3.5.1.18) (N-succinyl-LL-2,6-diaminoheptanedioate amidohydrolase)	dapE ASJ32_18000 GO994_07465	OTHER	Cytoplasmic	E	Catalyzes the hydrolysis of N-succinyl-L,L- diaminopimelic acid (SDAP), forming succinate and LL-2,6- diaminoheptanedioate (DAP), an intermediate involved in the bacterial biosynthesis of lysine and meso-diaminopimelic acid, an essential component of bacterial cell walls	16.8874	17.0912	16.9678	16.6751	NaN	NaN	NaN	NaN	16.8874	17.0912	16.9678	16.6751	13.6495	12.6133	12.675	14.4136				+	Ctrl_Extra_Fe_Extra	3.73051	0.00145463	3.56755	8.13037	30	30	30	72.5	72.5	72.5	40.456	0	323.31	1968300000	870	A0A6P1H8M4	A0A6P1H8M4	2658
A0A6N4CX03	Chaperone protein DnaK (HSP70) (Heat shock 70 kDa protein) (Heat shock protein 70)	dnaK ASJ32_13375	OTHER	Cytoplasmic	O	Heat shock 70 kDa protein	18.1325	17.9227	17.6251	18.174	14.2585	NaN	14.8103	14.1715	18.1325	17.9227	17.6251	18.174	14.2585	12.6054	14.8103	14.1715				+	Ctrl_Extra_Fe_Extra	3.74176	0.00143252	4.00213	8.1683	124	124	124	91.7	91.7	91.7	69.557	0	323.31	133200000000	22743	A0A6N4CX03	A0A6N4CX03	1855
A0A6N4CUQ7	3-oxoacyl-ACP synthase (EC 2.3.1.41) (Beta-ketoacyl-ACP synthase)	ASJ32_04690 GO994_04830	SP(Sec/SPI)	Cytoplasmic	IQ	Beta-ketoacyl synthase, C-terminal domain	15.3104	15.4891	16.2317	15.6885	NaN	NaN	NaN	NaN	15.3104	15.4891	16.2317	15.6885	13.7594	12.8029	13.0985	12.6248				+	Ctrl_Extra_Fe_Extra	3.74249	0.00143252	2.60856	8.17076	12	12	12	44.1	44.1	44.1	43.203	0	323.31	500550000	360	A0A6N4CUQ7	A0A6N4CUQ7	1369
A0A6N4CNQ1	Uncharacterized protein	ASJ32_08520	OTHER	Unknown	S	Phage tail assembly chaperone	16.7826	17.4901	17.9595	18.0656	NaN	NaN	NaN	NaN	16.7826	17.4901	17.9595	18.0656	13.7229	12.1515	13.9774	13.7398				+	Ctrl_Extra_Fe_Extra	3.7425	0.00143252	4.17657	8.17079	3	3	3	27.6	27.6	27.6	9.0443	0	74.498	88448000	116	A0A6N4CNQ1	A0A6N4CNQ1	190
A0A6N4CRF2	50S ribosomal protein L25	rplY ASJ32_12680 GO994_11770	OTHER	Cytoplasmic	J	This is one of the proteins that binds to the 5S RNA in the ribosome where it forms part of the central protuberance	16.5133	17.2671	17.2	17.3832	NaN	NaN	NaN	NaN	16.5133	17.2671	17.2	17.3832	12.885	11.6508	13.2973	13.8575				+	Ctrl_Extra_Fe_Extra	3.75321	0.00143252	4.16825	8.20707	18	18	18	98.9	98.9	98.9	10.723	0	323.31	43419000000	5951	A0A6N4CRF2	A0A6N4CRF2	639
A0A6N4CSW9	HAD family hydrolase	ASJ32_05225	OTHER	Unknown	S	Sucrose-6F-phosphate phosphohydrolase	16.6247	17.2111	16.8169	16.8636	NaN	NaN	NaN	NaN	16.6247	17.2111	16.8169	16.8636	12.1449	13.0772	14.1624	13.4164				+	Ctrl_Extra_Fe_Extra	3.82079	0.00126128	3.67887	8.43912	21	21	21	69.5	69.5	69.5	29.031	0	323.31	1580900000	717	A0A6N4CSW9	A0A6N4CSW9	941
A0A6N4CVY3	30S ribosomal protein S16	rpsP ASJ32_03745 GO994_18405	OTHER	Cytoplasmic	J	Belongs to the bacterial ribosomal protein bS16 family	17.0712	17.112	16.454	15.5298	NaN	NaN	NaN	NaN	17.0712	17.112	16.454	15.5298	13.192	13.2826	13.4996	12.8232				+	Ctrl_Extra_Fe_Extra	3.82498	0.00126128	3.34238	8.45371	15	15	15	95.1	95.1	95.1	8.9612	0	323.31	33885000000	3232	A0A6N4CVY3	A0A6N4CVY3	1632
A0A6N4CTX8	Alpha/beta fold hydrolase (Esterase)	ASJ32_03000 GO994_09115	OTHER	Unknown	S	Serine aminopeptidase, S33	15.1623	15.3294	15.3211	15.0507	NaN	NaN	NaN	NaN	15.1623	15.3294	15.3211	15.0507	13.5253	12.8166	13.7653	13.0512				+	Ctrl_Extra_Fe_Extra	3.83791	0.00124038	1.9263	8.49883	12	12	12	51.6	51.6	51.6	27.708	0	187.17	188220000	191	A0A6N4CTX8	A0A6N4CTX8	1190
A0A6N4CUC4	Phosphoglycerate kinase (EC 2.7.2.3)	pgk ASJ32_17590 GO994_03795	OTHER	Cytoplasmic	F	Belongs to the phosphoglycerate kinase family	20.9208	21.2499	21.0984	20.6464	18.2033	17.0815	17.2982	18.5389	20.9208	21.2499	21.0984	20.6464	18.2033	17.0815	17.2982	18.5389				+	Ctrl_Extra_Fe_Extra	3.85427	0.00120841	3.19838	8.55621	56	56	56	99	99	99	40.464	0	323.31	40933000000	10194	A0A6N4CUC4	A0A6N4CUC4	1279
A0A6P1H453	Sulfate adenylyltransferase subunit 1 (EC 2.7.7.4) (ATP-sulfurylase large subunit) (Sulfate adenylate transferase) (SAT)	cysN ASJ32_20695 GO994_03660	OTHER	Cytoplasmic	H	Belongs to the TRAFAC class translation factor GTPase superfamily. Classic translation factor GTPase family. CysN NodQ subfamily	14.8782	14.4025	15.1762	15.1769	NaN	NaN	NaN	NaN	14.8782	14.4025	15.1762	15.1769	13.3794	13.3134	13.1456	13.085				+	Ctrl_Extra_Fe_Extra	3.86281	0.00120841	1.67759	8.58628	48	48	48	77.7	77.7	77.7	52.222	0	323.31	7893800000	1929	A0A6P1H453	A0A6P1H453	2577
A0A6N4CP37	Peptidyl-prolyl cis-trans isomerase (PPIase) (EC 5.2.1.8)	ASJ32_09315	OTHER	Cytoplasmic	O	PPIases accelerate the folding of proteins. It catalyzes the cis-trans isomerization of proline imidic peptide bonds in oligopeptides	18.326	18.3323	18.582	18.429	14.8937	NaN	NaN	NaN	18.326	18.3323	18.582	18.429	14.8937	12.2708	13.6908	12.7608				+	Ctrl_Extra_Fe_Extra	3.87743	0.00118707	5.01331	8.638	20	20	20	98.2	98.2	98.2	17.93	0	323.31	5915400000	1795	A0A6N4CP37	A0A6N4CP37	225
A0A6N4CSI8	Phosphoribosylamine--glycine ligase (EC 6.3.4.13) (GARS) (Glycinamide ribonucleotide synthetase) (Phosphoribosylglycinamide synthetase)	purD ASJ32_19715	OTHER	Cytoplasmic	F	Belongs to the GARS family	21.22	21.1469	21.1563	20.3975	18.6519	17.2353	17.4535	17.8212	21.22	21.1469	21.1563	20.3975	18.6519	17.2353	17.4535	17.8212				+	Ctrl_Extra_Fe_Extra	3.88905	0.00118427	3.18972	8.6793	58	58	58	91.8	91.8	91.8	45.537	0	323.31	17931000000	5143	A0A6N4CSI8	A0A6N4CSI8	858
A0A6N4CW55	Aconitate hydratase B (EC 4.2.1.3) (EC 4.2.1.99) (2-methylisocitrate dehydratase)	ASJ32_14970	OTHER	Cytoplasmic	C	Belongs to the aconitase IPM isomerase family	18.4027	18.2838	18.4471	19.1182	14.8973	NaN	12.4501	12.5401	18.4027	18.2838	18.4471	19.1182	14.8973	13.4572	12.4501	12.5401				+	Ctrl_Extra_Fe_Extra	3.90482	0.00115632	5.22683	8.7356	102	102	102	86.5	86.5	86.5	93.098	0	323.31	24099000000	6120	A0A6N4CW55	A0A6N4CW55	1677
A0A6N4CYP4	Bifunctional protein GlmU [Includes: UDP-N-acetylglucosamine pyrophosphorylase (EC 2.7.7.23) (N-acetylglucosamine-1-phosphate uridyltransferase); Glucosamine-1-phosphate N-acetyltransferase (EC 2.3.1.157)]	glmU ASJ32_09805 GO994_22040	OTHER	Cytoplasmic	M	Catalyzes the last two sequential reactions in the de novo biosynthetic pathway for UDP-N-acetylglucosamine (UDP- GlcNAc). The C-terminal domain catalyzes the transfer of acetyl group from acetyl coenzyme A to glucosamine-1-phosphate (GlcN-1-P) to produce N-acetylglucosamine-1-phosphate (GlcNAc-1-P), which is converted into UDP-GlcNAc by the transfer of uridine 5- monophosphate (from uridine 5-tr…	18.1162	17.6563	17.2805	16.2725	NaN	NaN	NaN	NaN	18.1162	17.6563	17.2805	16.2725	13.305	13.7076	13.9196	13.076				+	Ctrl_Extra_Fe_Extra	3.9174	0.00115212	3.82933	8.78074	48	48	48	82.3	82.3	82.3	48.631	0	323.31	4893900000	2089	A0A6N4CYP4	A0A6N4CYP4	2197
A0A6N4CTF0	Aminomethyltransferase (EC 2.1.2.10) (Glycine cleavage system T protein)	gcvT ASJ32_02080	OTHER	Cytoplasmic	E	The glycine cleavage system catalyzes the degradation of glycine	17.6182	17.2539	17.238	16.9779	NaN	NaN	NaN	NaN	17.6182	17.2539	17.238	16.9779	14.0158	12.7597	14.555	13.4304				+	Ctrl_Extra_Fe_Extra	3.91837	0.00115212	3.58177	8.78426	30	30	30	67.1	67.1	67.1	39.691	0	323.31	1229100000	788	A0A6N4CTF0	A0A6N4CTF0	1069
A0A6N4CTM9	HPr family phosphocarrier protein (PTS sugar transporter)	ASJ32_19220 GO994_16545	OTHER	Cytoplasmic	G	phosphocarrier protein	17.4125	18.3593	19.0802	19.4525	14.8253	NaN	NaN	NaN	17.4125	18.3593	19.0802	19.4525	14.8253	14.0991	14.0734	13.9768				+	Ctrl_Extra_Fe_Extra	3.9337	0.00113888	4.33243	8.83955	24	24	24	100	100	100	9.0943	0	323.31	15497000000	2689	A0A6N4CTM9	A0A6N4CTM9	1125
A0A6N4CNT4	S-adenosylmethionine synthase (AdoMet synthase) (EC 2.5.1.6) (MAT) (Methionine adenosyltransferase)	metK ASJ32_08405 GO994_16830	OTHER	Cytoplasmic	H	Catalyzes the formation of S-adenosylmethionine (AdoMet) from methionine and ATP. The overall synthetic reaction is composed of two sequential steps, AdoMet formation and the subsequent tripolyphosphate hydrolysis which occurs prior to release of AdoMet from the enzyme	17.939	17.3504	17.3341	17.7288	NaN	NaN	NaN	NaN	17.939	17.3504	17.3341	17.7288	13.7755	12.2416	14.2447	13.7468				+	Ctrl_Extra_Fe_Extra	3.94571	0.00112258	4.08593	8.88311	45	45	45	94.5	94.5	94.5	41.596	0	323.31	16206000000	3590	A0A6N4CNT4	A0A6N4CNT4	201
A0A1Q4MCH7	Uncharacterized protein	ASJ32_22120	OTHER	Unknown	/	/	14.7201	15.3996	15.5135	15.3549	NaN	NaN	NaN	NaN	14.7201	15.3996	15.5135	15.3549	13.4363	13.5241	13.1335	13.5555				+	Ctrl_Extra_Fe_Extra	3.98712	0.00103427	1.8347	9.03473	14	14	14	60.3	60.3	60.3	15.993	0	323.31	792730000	344	A0A1Q4MCH7	A0A1Q4MCH7	16
A0A6N4CUN2	3-ketoacyl-CoA thiolase (EC 2.3.1.16) (Acetyl-CoA acyltransferase) (Beta-ketothiolase) (Fatty acid oxidation complex subunit beta)	fadA ASJ32_15525 GO994_21590	OTHER	Cytoplasmic	I	Catalyzes the final step of fatty acid oxidation in which acetyl-CoA is released and the CoA ester of a fatty acid two carbons shorter is formed	17.389	20.0163	18.6048	18.6007	NaN	NaN	NaN	NaN	17.389	20.0163	18.6048	18.6007	13.8055	12.9143	12.7998	13.4529				+	Ctrl_Extra_Fe_Extra	4.03828	0.000943104	5.4096	9.22519	24	24	24	58.4	58.4	58.4	40.976	0	323.31	3070600000	1029	A0A6N4CUN2	A0A6N4CUN2	1351
A0A6N4CTQ8	Pantothenate synthetase (PS) (EC 6.3.2.1) (Pantoate--beta-alanine ligase) (Pantoate-activating enzyme)	panC ASJ32_18590 GO994_17810	OTHER	Cytoplasmic	H	Catalyzes the condensation of pantoate with beta-alanine in an ATP-dependent reaction via a pantoyl-adenylate intermediate	15.2893	15.3559	15.2811	15.6943	NaN	NaN	NaN	NaN	15.2893	15.3559	15.2811	15.6943	13.3217	13.1709	13.992	13.2577				+	Ctrl_Extra_Fe_Extra	4.05594	0.000920009	1.96957	9.29174	26	26	26	74.3	74.3	74.3	31.052	0	323.31	1035700000	501	A0A6N4CTQ8	A0A6N4CTQ8	1146
A0A6N4CPG1	Transcription termination/antitermination protein NusG	nusG ASJ32_07340 GO994_01655	OTHER	Cytoplasmic	K	Participates in transcription elongation, termination and antitermination	15.9848	16.3623	15.4678	15.8295	NaN	NaN	NaN	NaN	15.9848	16.3623	15.4678	15.8295	13.5109	13.0403	13.4495	12.495				+	Ctrl_Extra_Fe_Extra	4.0665	0.000916163	2.78717	9.33176	16	16	16	76.5	76.5	76.5	20.994	0	323.31	18616000000	4103	A0A6N4CPG1	A0A6N4CPG1	271
A0A6N4CUM0	RNA methyltransferase	ASJ32_15620	OTHER	Cytoplasmic	J	Belongs to the class I-like SAM-binding methyltransferase superfamily. RNA M5U methyltransferase family	15.9256	15.9525	16.1864	16.2485	NaN	NaN	NaN	NaN	15.9256	15.9525	16.1864	16.2485	14.398	13.5106	13.3212	13.5122				+	Ctrl_Extra_Fe_Extra	4.07926	0.000910371	2.39277	9.3803	34	34	34	76	76	76	49.467	0	323.31	5453400000	1649	A0A6N4CUM0	A0A6N4CUM0	1343
A0A6N4CXW1	Adenylate kinase (AK) (EC 2.7.4.3) (ATP-AMP transphosphorylase) (ATP:AMP phosphotransferase) (Adenylate monophosphate kinase)	adk ASJ32_11255	OTHER	Cytoplasmic	F	Catalyzes the reversible transfer of the terminal phosphate group between ATP and AMP. Plays an important role in cellular energy homeostasis and in adenine nucleotide metabolism	18.3884	18.1008	17.6677	18.3712	14.834	NaN	NaN	NaN	18.3884	18.1008	17.6677	18.3712	14.834	13.4075	12.6791	13.4051				+	Ctrl_Extra_Fe_Extra	4.09687	0.000887247	4.55056	9.44766	37	37	37	93	93	93	23.196	0	323.31	14361000000	3199	A0A6N4CXW1	A0A6N4CXW1	2033
A0A6N4CW51	UPF0246 protein ASJ32_15750	yaaA ASJ32_15750 GO994_18655	OTHER	Cytoplasmic	S	Belongs to the UPF0246 family	17.1211	16.9684	17.1872	16.5627	NaN	NaN	NaN	NaN	17.1211	16.9684	17.1872	16.5627	13.6784	13.5025	14.0978	12.472				+	Ctrl_Extra_Fe_Extra	4.0982	0.000887247	3.52217	9.45276	18	18	18	60.3	60.3	60.3	29.2	0	316.96	2245600000	681	A0A6N4CW51	A0A6N4CW51	1674
A0A6N4CZZ7	Peptidyl-prolyl cis-trans isomerase (PPIase) (EC 5.2.1.8)	ASJ32_01075 GO994_06585	SP(Sec/SPI)	Unknown	M	PPIases accelerate the folding of proteins. It catalyzes the cis-trans isomerization of proline imidic peptide bonds in oligopeptides	18.2052	18.2014	16.8882	16.9665	NaN	NaN	NaN	NaN	18.2052	18.2014	16.8882	16.9665	12.8772	12.8757	13.9374	13.504				+	Ctrl_Extra_Fe_Extra	4.10172	0.000887247	4.26677	9.46629	15	15	15	68.9	68.9	68.9	20.032	0	323.31	1905500000	695	A0A6N4CZZ7	A0A6N4CZZ7	2435
A0A6N4CXI5	Proline--tRNA ligase (EC 6.1.1.15) (Prolyl-tRNA synthetase) (ProRS)	proS ASJ32_04085 GO994_18055	OTHER	Cytoplasmic	J	Catalyzes the attachment of proline to tRNA(Pro) in a two-step reaction proline is first activated by ATP to form Pro- AMP and then transferred to the acceptor end of tRNA(Pro). As ProRS can inadvertently accommodate and process non-cognate amino acids such as alanine and cysteine, to avoid such errors it has two additional distinct editing activities against alanine. One activity is designated a…	16.7074	16.1906	16.8059	16.8114	NaN	NaN	NaN	NaN	16.7074	16.1906	16.8059	16.8114	14.5497	13.4554	13.6185	13.9605				+	Ctrl_Extra_Fe_Extra	4.1451	0.000831208	2.73279	9.63437	63	63	63	86.2	86.2	86.2	62.722	0	323.31	15117000000	3083	A0A6N4CXI5	A0A6N4CXI5	1955
A0A6N4CWB7	30S ribosomal protein S6	rpsF ASJ32_03950 GO994_18190	OTHER	Cytoplasmic	J	Binds together with S18 to 16S ribosomal RNA	17.7073	17.8662	18.2838	18.1898	NaN	NaN	NaN	NaN	17.7073	17.8662	18.2838	18.1898	13.0073	13.3824	12.6723	14.7259				+	Ctrl_Extra_Fe_Extra	4.16403	0.000808389	4.56477	9.70854	26	26	26	100	100	100	15.077	0	323.31	75140000000	7927	A0A6N4CWB7	A0A6N4CWB7	1715
A0A6N4CVV4	Peptide ABC transporter substrate-binding protein	ASJ32_15795	SP(Sec/SPI)	Periplasmic	E	Bacterial extracellular solute-binding proteins, family 5 Middle	17.3289	17.2811	17.7018	16.8766	13.0763	NaN	13.6638	14.5497	17.3289	17.2811	17.7018	16.8766	13.0763	14.0745	13.6638	14.5497				+	Ctrl_Extra_Fe_Extra	4.16888	0.000808389	3.45604	9.72762	43	43	43	80.9	80.9	80.9	59.911	0	323.31	1931300000	1174	A0A6N4CVV4	A0A6N4CVV4	1616
A0A6N4CT14	Alpha-aspartyl dipeptidase	ASJ32_04210	OTHER	Cytoplasmic	E	Hydrolyzes dipeptides containing N-terminal aspartate residues. May play a role in allowing the cell to use peptide aspartate to spare carbon otherwise required for the synthesis of the aspartate family of amino acids	15.3178	15.5761	15.6155	15.4125	NaN	NaN	NaN	NaN	15.3178	15.5761	15.6155	15.4125	12.6635	13.5812	13.5526	13.1027				+	Ctrl_Extra_Fe_Extra	4.21209	0.000772757	2.25546	9.89919	15	15	15	60.6	60.6	60.6	27.202	0	323.31	354290000	192	A0A6N4CT14	A0A6N4CT14	973
A0A6N4CSW4	PTS glucose transporter subunit IIA	ASJ32_19210	OTHER	Cytoplasmic	G	Pts system	19.0786	19.6037	19.5366	19.9279	17.486	16.94	16.6869	17.2107	19.0786	19.6037	19.5366	19.9279	17.486	16.94	16.6869	17.2107				+	Ctrl_Extra_Fe_Extra	4.23761	0.000741223	2.45581	10.0018	24	24	24	80.5	80.5	80.5	18.118	0	323.31	11007000000	2220	A0A6N4CSW4	A0A6N4CSW4	939
A0A6N4D0A2	Glycine dehydrogenase (decarboxylating) (EC 1.4.4.2) (Glycine cleavage system P-protein) (Glycine decarboxylase) (Glycine dehydrogenase (aminomethyl-transferring))	gcvP ASJ32_02070 GO994_10100	OTHER	Cytoplasmic	E	The glycine cleavage system catalyzes the degradation of glycine. The P protein binds the alpha-amino group of glycine through its pyridoxal phosphate cofactor	20.0729	20.1246	20.4615	19.8119	18.6513	18.1176	18.1947	18.2683	20.0729	20.1246	20.4615	19.8119	18.6513	18.1176	18.1947	18.2683				+	Ctrl_Extra_Fe_Extra	4.27136	0.00071029	1.80974	10.1389	85	85	85	78.2	78.2	78.2	103.49	0	323.31	8678900000	5224	A0A6N4D0A2	A0A6N4D0A2	2481
A0A6N4CWL7	Isoleucine--tRNA ligase (EC 6.1.1.5) (Isoleucyl-tRNA synthetase) (IleRS)	ileS ASJ32_03830 GO994_18310	OTHER	Cytoplasmic	J	amino acids such as valine, to avoid such errors it has two additional distinct tRNA(Ile)-dependent editing activities. One activity is designated as 'pretransfer' editing and involves the hydrolysis of activated Val-AMP. The other activity is designated 'posttransfer' editing and involves deacylation of mischarged Val-tRNA(Ile)	20.7367	20.6791	20.9463	20.6952	18.4774	17.0712	17.739	17.6579	20.7367	20.6791	20.9463	20.6952	18.4774	17.0712	17.739	17.6579				+	Ctrl_Extra_Fe_Extra	4.30254	0.000673116	3.02796	10.2671	101	101	101	79.5	79.5	79.5	106.24	0	323.31	24411000000	7073	A0A6N4CWL7	A0A6N4CWL7	1770
A0A6N4CXZ9	Hydrolase	ASJ32_09450	OTHER	Cytoplasmic	S	Sucrose-6F-phosphate phosphohydrolase	15.2252	15.9706	15.9596	16.2314	NaN	NaN	NaN	NaN	15.2252	15.9706	15.9596	16.2314	13.6298	13.2696	13.3595	13.1209				+	Ctrl_Extra_Fe_Extra	4.32533	0.000650526	2.50182	10.3618	21	21	21	68.1	68.1	68.1	30.108	0	323.31	524190000	308	A0A6N4CXZ9	A0A6N4CXZ9	2055
A0A6N4CVH0	Lipase	ASJ32_15345	LIPO(Sec/SPII)	Extracellular	I	Bacterial virulence factor lipase N-terminal	20.9371	21.3454	20.9385	20.391	18.6097	18.6733	18.1388	18.5927	20.9371	21.3454	20.9385	20.391	18.6097	18.6733	18.1388	18.5927				+	Ctrl_Extra_Fe_Extra	4.32933	0.000650526	2.39937	10.3784	42	42	42	68.4	68.4	68.4	82.553	0	323.31	9891500000	5056	A0A6N4CVH0	A0A6N4CVH0	1528
A0A6N4CZY3	Molybdate ABC transporter substrate-binding protein	modA ASJ32_02715 GO994_09420	SP(Sec/SPI)	Periplasmic	P	Bacterial extracellular solute-binding protein	17.0599	17.3351	17.4992	16.8748	NaN	NaN	NaN	NaN	17.0599	17.3351	17.4992	16.8748	14.0701	13.1689	12.8293	14.0321				+	Ctrl_Extra_Fe_Extra	4.4155	0.000574488	3.66714	10.744	13	13	13	49.6	49.6	49.6	25.231	0	134.07	163680000	132	A0A6N4CZY3	A0A6N4CZY3	2427
A0A6N4CTI0	High-affinity zinc uptake system protein ZnuA	ASJ32_03210	SP(Sec/SPI)	Periplasmic	P	Belongs to the bacterial solute-binding protein 9 family	17.1187	17.7397	17.4559	18.2723	NaN	NaN	NaN	NaN	17.1187	17.7397	17.4559	18.2723	14.24	12.9133	13.8229	13.3778				+	Ctrl_Extra_Fe_Extra	4.42802	0.000574488	4.05814	10.7981	22	22	22	57.2	57.2	57.2	33.99	0	323.31	7074500000	1926	A0A6N4CTI0	A0A6N4CTI0	1090
A0A6P1HBD2	Pseudouridine synthase (EC 5.4.99.-)	rluB ASJ32_20965 GO994_15825	OTHER	Cytoplasmic	J	Belongs to the pseudouridine synthase RsuA family	15.1071	14.9821	15.4483	14.8297	NaN	NaN	NaN	NaN	15.1071	14.9821	15.4483	14.8297	13.3545	13.2673	13.6015	13.1643				+	Ctrl_Extra_Fe_Extra	4.43098	0.000574488	1.74492	10.8109	46	46	46	83.1	83.1	83.1	34.747	0	323.31	9115600000	3706	A0A6P1HBD2	A0A6P1HBD2	2703
A0A6N4CXL8	Phosphoribosylformylglycinamidine cyclo-ligase (EC 6.3.3.1) (AIR synthase) (AIRS) (Phosphoribosyl-aminoimidazole synthetase)	purM ASJ32_12300 GO994_14865	OTHER	Cytoplasmic	F	Phosphoribosylformylglycinamidine cyclo-ligase	16.8059	16.6531	16.7724	17.8256	NaN	NaN	NaN	NaN	16.8059	16.6531	16.7724	17.8256	13.3403	13.8067	13.6107	13.9814				+	Ctrl_Extra_Fe_Extra	4.4536	0.000574488	3.32948	10.9094	29	29	29	73.3	73.3	73.3	36.697	0	323.31	10118000000	2680	A0A6N4CXL8	A0A6N4CXL8	1976
A0A6N4CTD4	Bifunctional purine biosynthesis protein PurH [Includes: Phosphoribosylaminoimidazolecarboxamide formyltransferase (EC 2.1.2.3) (AICAR transformylase); IMP cyclohydrolase (EC 3.5.4.10) (ATIC) (IMP synthase) (Inosinicase)]	purH ASJ32_19720	OTHER	Cytoplasmic	F	Bifunctional purine biosynthesis protein PurH	20.6293	20.8473	20.8104	20.0538	18.3475	18.2137	17.7877	17.818	20.6293	20.8473	20.8104	20.0538	18.3475	18.2137	17.7877	17.818				+	Ctrl_Extra_Fe_Extra	4.47462	0.000566135	2.54348	11.0016	69	69	69	87.2	87.2	87.2	56.833	0	323.31	45000000000	10102	A0A6N4CTD4	A0A6N4CTD4	1056
A0A6P1H8K9	Cytidylate kinase (CK) (EC 2.7.4.25) (Cytidine monophosphate kinase) (CMP kinase)	cmk ASJ32_21145 GO994_13875	OTHER	Cytoplasmic	F	Belongs to the cytidylate kinase family. Type 1 subfamily	16.8157	16.4491	16.9272	17.2781	NaN	NaN	NaN	NaN	16.8157	16.4491	16.9272	17.2781	13.6416	13.4584	13.99	12.7654				+	Ctrl_Extra_Fe_Extra	4.47715	0.000566135	3.40364	11.0127	22	22	22	59.1	59.1	59.1	25.198	0	323.31	853710000	470	A0A6P1H8K9	A0A6P1H8K9	2656
A0A6N4CPK2	Alpha-amylase (EC 3.2.1.1)	ASJ32_07990	SP(Sec/SPI)	Extracellular	G	alpha-amylase	15.0826	15.7796	15.1655	15.0328	NaN	NaN	NaN	NaN	15.0826	15.7796	15.1655	15.0328	12.9057	13.3409	13.1036	12.9864				+	Ctrl_Extra_Fe_Extra	4.47985	0.000566135	2.181	11.0246	14	14	14	40	40	40	51.942	0	141.97	167460000	75	A0A6N4CPK2	A0A6N4CPK2	294
A0A6N4CTV7	Cold-shock protein (Ribosome-associated translation inhibitor RaiA)	raiA ASJ32_02895 GO994_09220	OTHER	Cytoplasmic	J	ribosomal subunit interface protein	16.6664	16.9348	16.5768	17.4487	NaN	NaN	NaN	NaN	16.6664	16.9348	16.5768	17.4487	13.0789	13.6849	14.1461	13.4007				+	Ctrl_Extra_Fe_Extra	4.50098	0.000566135	3.32901	11.1183	12	12	12	83	83	83	12.678	0	123.54	1950400000	627	A0A6N4CTV7	A0A6N4CTV7	1177
A0A6N4CWI9	Ribonuclease PH (RNase PH) (EC 2.7.7.56) (tRNA nucleotidyltransferase)	rph ASJ32_13760	OTHER	Cytoplasmic	J	Phosphorolytic exoribonuclease that removes nucleotide residues following the -CCA terminus of tRNA and adds nucleotides to the ends of RNA molecules by using nucleoside diphosphates as substrates	15.4537	15.5108	15.285	15.758	NaN	NaN	NaN	NaN	15.4537	15.5108	15.285	15.758	13.3493	12.9778	13.6795	13.5938				+	Ctrl_Extra_Fe_Extra	4.55218	0.000534255	2.10179	11.3481	19	19	19	75.4	75.4	75.4	25.844	0	323.31	3458000000	1435	A0A6N4CWI9	A0A6N4CWI9	1753
A0A6P1H7E0	Uridylate kinase (UK) (EC 2.7.4.22) (Uridine monophosphate kinase) (UMP kinase) (UMPK)	pyrH ASJ32_01300 GO994_06810	OTHER	Cytoplasmic	F	Catalyzes the reversible phosphorylation of UMP to UDP	17.2186	16.5409	17.4042	16.9466	NaN	NaN	NaN	NaN	17.2186	16.5409	17.4042	16.9466	14.0477	12.9173	13.4012	13.6392				+	Ctrl_Extra_Fe_Extra	4.62824	0.000472662	3.52621	11.6976	25	25	25	82	82	82	26.345	0	323.31	6130300000	2337	A0A6P1H7E0	A0A6P1H7E0	2635
A0A6N4CX20	30S ribosomal protein S20	rpsT ASJ32_03815 GO994_18325	OTHER	Unknown	J	Binds directly to 16S ribosomal RNA	17.1346	17.0633	16.9156	17.6318	NaN	NaN	NaN	NaN	17.1346	17.0633	16.9156	17.6318	12.7718	12.2095	13.6436	13.359				+	Ctrl_Extra_Fe_Extra	4.65321	0.000458643	4.19033	11.8146	20	20	20	88.5	88.5	88.5	9.5302	0	323.31	8233500000	1860	A0A6N4CX20	A0A6N4CX20	1868
A0A6N4CVZ5	Uncharacterized protein	ASJ32_03250 GO994_20645	OTHER	Cytoplasmic	-	-	18.3067	18.6816	18.9958	19.1083	NaN	NaN	NaN	NaN	18.3067	18.6816	18.9958	19.1083	14.2317	12.6482	13.7158	12.4533				+	Ctrl_Extra_Fe_Extra	4.67558	0.000448063	5.51084	11.9202	17	17	17	65.7	65.7	65.7	19.635	0	323.31	5315600000	1122	A0A6N4CVZ5;REV__A0A6N4CUX4	A0A6N4CVZ5	1640
A0A6N4CT97	AsnC family transcriptional regulator (Winged helix-turn-helix transcriptional regulator)	ASJ32_18310 GO994_03420	OTHER	Cytoplasmic	K	AsnC-type helix-turn-helix domain	16.0746	16.1807	16.4909	16.3502	NaN	NaN	NaN	NaN	16.0746	16.1807	16.4909	16.3502	13.7361	13.0287	13.3228	13.9634				+	Ctrl_Extra_Fe_Extra	4.71378	0.000422403	2.76134	12.1027	13	13	13	70.3	70.3	70.3	18.037	0	289.88	279800000	206	A0A6N4CT97	A0A6N4CT97	1031
A0A6N4CRD6	TldD/PmbA family protein (Zn-dependent protease)	ASJ32_20895 GO994_05385	OTHER	Cytoplasmic	S	Zn-dependent proteases and their inactivated homologs	17.9998	17.754	17.7068	16.9561	NaN	NaN	NaN	NaN	17.9998	17.754	17.7068	16.9561	12.8598	13.4431	13.8897	12.6735				+	Ctrl_Extra_Fe_Extra	4.74695	0.000415806	4.38762	12.2632	42	42	42	78.9	78.9	78.9	47.984	0	323.31	1169100000	755	A0A6N4CRD6	A0A6N4CRD6	628
A0A6N4CQ16	60 kDa chaperonin (GroEL protein) (Protein Cpn60)	groEL groL ASJ32_19820 GO994_04165	OTHER	Cytoplasmic	O	Prevents misfolding and promotes the refolding and proper assembly of unfolded polypeptides generated under stress conditions	19.0316	18.909	19.517	18.7625	16.3792	15.8583	16.4112	16.5605	19.0316	18.909	19.517	18.7625	16.3792	15.8583	16.4112	16.5605				+	Ctrl_Extra_Fe_Extra	4.75167	0.000415806	2.75274	12.2863	99	99	99	99.8	99.8	99.8	57.319	0	323.31	230760000000	42768	A0A6N4CQ16	A0A6N4CQ16	372
A0A6N4CTJ7	YtfJ family protein	ASJ32_17565 GO994_03765	SP(Sec/SPI)	Unknown	S	transcriptional regulator	15.3379	15.7905	15.6089	15.6239	NaN	NaN	NaN	NaN	15.3379	15.7905	15.6089	15.6239	13.1976	13.4793	13.1586	13.7203				+	Ctrl_Extra_Fe_Extra	5.01442	0.000256688	2.20136	13.6327	17	17	17	80	80	80	19.631	0	323.31	380180000	268	A0A6N4CTJ7	A0A6N4CTJ7	1102
A0A6N4CZT8	Ferric uptake regulation protein	fur ASJ32_03025 GO994_09090	OTHER	Cytoplasmic	K	Belongs to the Fur family	15.7819	15.2287	15.8426	15.8429	NaN	NaN	NaN	NaN	15.7819	15.2287	15.8426	15.8429	13.0001	12.2713	12.3923	12.7048				+	Ctrl_Extra_Fe_Extra	5.06585	0.000245567	3.08192	13.912	21	21	21	100	100	100	16.211	0	323.31	3403000000	1056	A0A6N4CZT8	A0A6N4CZT8	2400
A0A6N4CTC7	Aldehyde reductase	ASJ32_05335	OTHER	Cytoplasmic	C	alcohol dehydrogenase	19.8568	19.7166	18.9421	18.6371	NaN	NaN	NaN	NaN	19.8568	19.7166	18.9421	18.6371	13.5361	12.8962	12.4901	11.9131				+	Ctrl_Extra_Fe_Extra	5.18104	0.000195886	6.57927	14.5574	16	16	16	52	52	52	41.354	0	323.31	1783200000	721	A0A6N4CTC7	A0A6N4CTC7	1051
A0A6P1H6X1	Trigger factor (TF) (EC 5.2.1.8) (PPIase)	tig ASJ32_16860 GO994_08670	OTHER	Cytoplasmic	O	Involved in protein export. Acts as a chaperone by maintaining the newly synthesized protein in an open conformation. Functions as a peptidyl-prolyl cis-trans isomerase	18.4685	19.0868	18.1284	18.4616	NaN	NaN	NaN	NaN	18.4685	19.0868	18.1284	18.4616	13.3418	12.7925	13.0197	14.0718				+	Ctrl_Extra_Fe_Extra	5.29797	0.000155885	5.22992	15.2417	92	92	92	93.3	93.3	93.3	47.875	0	323.31	141010000000	25660	A0A6P1H6X1	A0A6P1H6X1	2622
A0A6N4CNY5	Signal recognition particle receptor FtsY (SRP receptor)	ftsY ASJ32_06410	OTHER	Cytoplasmic	D	Involved in targeting and insertion of nascent membrane proteins into the cytoplasmic membrane. Acts as a receptor for the complex formed by the signal recognition particle (SRP) and the ribosome-nascent chain (RNC). Interaction with SRP-RNC leads to the transfer of the RNC complex to the Sec translocase for insertion into the membrane, the hydrolysis of GTP by both Ffh and FtsY, and the dissocia…	18.3319	17.8671	17.0604	17.7353	NaN	NaN	NaN	NaN	18.3319	17.8671	17.0604	17.7353	12.8926	12.4908	13.101	13.2501				+	Ctrl_Extra_Fe_Extra	5.3453	0.000145867	4.81507	15.5273	75	75	75	81.3	81.3	81.3	66.126	0	323.31	10619000000	2767	A0A6N4CNY5	A0A6N4CNY5	209
A0A6N4CR79	Urocanate hydratase (Urocanase) (EC 4.2.1.49) (Imidazolonepropionate hydrolase)	hutU ASJ32_06370	OTHER	Cytoplasmic	H	Catalyzes the conversion of urocanate to 4-imidazolone- 5-propionate	20.2776	20.0825	19.475	19.4533	15.4473	15.11	15.4949	14.5656	20.2776	20.0825	19.475	19.4533	15.4473	15.11	15.4949	14.5656				+	Ctrl_Extra_Fe_Extra	5.34772	0.000145867	4.66763	15.542	50	50	50	73.4	73.4	73.4	61.954	0	323.31	6602500000	2633	A0A6N4CR79	A0A6N4CR79	592
A0A6N4CTZ0	Elongation factor P (EF-P)	efp ASJ32_17125 GO994_05715	OTHER	Cytoplasmic	J	Involved in peptide bond synthesis. Stimulates efficient translation and peptide-bond synthesis on native or reconstituted 70S ribosomes in vitro. Probably functions indirectly by altering the affinity of the ribosome for aminoacyl-tRNA, thus increasing their reactivity as acceptors for peptidyl transferase	19.0684	19.5439	19.5101	19.6283	13.6299	NaN	NaN	NaN	19.0684	19.5439	19.5101	19.6283	13.6299	12.1773	12.5255	13.6789				+	Ctrl_Extra_Fe_Extra	5.41659	0.000142353	6.4348	15.9672	25	25	25	67.6	67.6	67.6	21.065	0	323.31	15643000000	2950	A0A6N4CTZ0	A0A6N4CTZ0	1193
A0A6N4D0R9	Uncharacterized protein	ASJ32_00520	OTHER	Unknown	O	OsmC-like protein	18.1268	18.8031	17.6952	18.5891	NaN	NaN	NaN	NaN	18.1268	18.8031	17.6952	18.5891	13.0111	11.9586	12.7261	11.969				+	Ctrl_Extra_Fe_Extra	5.448	0.000142353	5.88735	16.1647	10	10	10	59.7	59.7	59.7	14.492	0	63.2	616710000	225	A0A6N4D0R9	A0A6N4D0R9	2526
A0A6N4CQ45	Aspartate carbamoyltransferase (EC 2.1.3.2) (Aspartate transcarbamylase) (ATCase)	pyrB ASJ32_07585	OTHER	Cytoplasmic	F	Belongs to the ATCase OTCase family	18.816	18.2111	18.8879	18.875	NaN	NaN	NaN	NaN	18.816	18.2111	18.8879	18.875	13.3595	13.0319	14.192	13.7585				+	Ctrl_Extra_Fe_Extra	5.59023	0.000112281	5.11201	17.0893	40	40	40	99	99	99	34.138	0	323.31	9975800000	2138	A0A6N4CQ45	A0A6N4CQ45	384
A0A6N4CWL0	Quinolinate phosphoribosyltransferase [decarboxylating] (EC 2.4.2.19)	nadC ASJ32_15030 GO994_02455	OTHER	Cytoplasmic	H	Belongs to the NadC ModD family	15.4129	15.1854	15.7663	15.5633	NaN	NaN	NaN	NaN	15.4129	15.1854	15.7663	15.5633	12.8706	12.7765	12.3949	12.5594				+	Ctrl_Extra_Fe_Extra	5.63512	0.000107584	2.83164	17.3915	24	24	24	72.6	72.6	72.6	30.802	0	165.62	870690000	325	A0A6N4CWL0	A0A6N4CWL0	1764
A0A6N4CLD2	50S ribosomal protein L11	rplK ASJ32_07335 GO994_01660	OTHER	Cytoplasmic	J	Forms part of the ribosomal stalk which helps the ribosome interact with GTP-bound translation factors	19.1227	18.3686	19.0664	19.242	NaN	NaN	NaN	NaN	19.1227	18.3686	19.0664	19.242	12.9434	14.0599	13.053	13.1286				+	Ctrl_Extra_Fe_Extra	5.64172	0.000107584	5.65368	17.4364	30	30	30	91.5	91.5	91.5	14.989	0	323.31	94903000000	9950	A0A6N4CLD2	A0A6N4CLD2	57
A0A6N4CS04	Aldoketomutase (EC 4.4.1.5) (Glyoxalase I) (Ketone-aldehyde mutase) (Methylglyoxalase) (S-D-lactoylglutathione methylglyoxal lyase)	gloA ASJ32_20065 GO994_13265	OTHER	Cytoplasmic	E	Lactoylglutathione lyase	18.0189	18.275	18.2726	18.8067	NaN	NaN	NaN	NaN	18.0189	18.275	18.2726	18.8067	13.6063	13.8186	12.8094	13.2173				+	Ctrl_Extra_Fe_Extra	5.71584	0.000107584	4.98043	17.948	7	7	7	40.9	40.9	40.9	15.094	0	113.43	571210000	237	A0A6N4CS04	A0A6N4CS04	745
A0A6N4CYL5	50S ribosomal protein L6	rplF ASJ32_10980	OTHER	Cytoplasmic	J	This protein binds to the 23S rRNA, and is important in its secondary structure. It is located near the subunit interface in the base of the L7 L12 stalk, and near the tRNA binding site of the peptidyltransferase center	18.5075	17.8691	18.2949	18.5275	NaN	NaN	NaN	NaN	18.5075	17.8691	18.2949	18.5275	14.0695	13.4176	14.2497	13.5919				+	Ctrl_Extra_Fe_Extra	5.72059	0.000107584	4.46755	17.9813	34	34	34	98.3	98.3	98.3	18.51	0	323.31	121680000000	14657	A0A6N4CYL5	A0A6N4CYL5	2180
A0A6N4CPI4	Pseudouridine synthase (EC 5.4.99.-)	rluD ASJ32_07505	OTHER	Cytoplasmic	J	Responsible for synthesis of pseudouridine from uracil	15.773	15.8275	16.1235	15.984	NaN	NaN	NaN	NaN	15.773	15.8275	16.1235	15.984	12.7083	13.0116	13.326	12.8164				+	Ctrl_Extra_Fe_Extra	5.84244	0.000106795	2.9614	18.8557	23	23	23	67.8	67.8	67.8	36.759	0	323.31	4054100000	1020	A0A6N4CPI4	A0A6N4CPI4	286
A0A6N4CQ60	30S ribosomal protein S1	rpsA ASJ32_21140	OTHER	Cytoplasmic	J	thus facilitating recognition of the initiation point. It is needed to translate mRNA with a short Shine-Dalgarno (SD) purine-rich sequence	19.0187	19.7591	19.5592	19.7226	13.7075	NaN	NaN	NaN	19.0187	19.7591	19.5592	19.7226	13.7075	13.5927	13.2704	14.43				+	Ctrl_Extra_Fe_Extra	5.90306	0.000103201	5.76474	19.306	118	118	118	93.7	93.7	93.7	61.401	0	323.31	277470000000	39513	A0A6N4CQ60	A0A6N4CQ60	394
A0A6P1H711	Serine--tRNA ligase (EC 6.1.1.11) (Seryl-tRNA synthetase) (SerRS) (Seryl-tRNA(Ser/Sec) synthetase)	serS ASJ32_11800 GO994_13000	OTHER	Cytoplasmic	J	Catalyzes the attachment of serine to tRNA(Ser). Is also able to aminoacylate tRNA(Sec) with serine, to form the misacylated tRNA L-seryl-tRNA(Sec), which will be further converted into selenocysteinyl-tRNA(Sec)	17.6475	17.521	17.8962	18.0275	13.2802	NaN	NaN	NaN	17.6475	17.521	17.8962	18.0275	13.2802	13.9257	14.0262	13.561				+	Ctrl_Extra_Fe_Extra	5.95846	0.000102197	4.07478	19.7266	71	71	71	96.1	96.1	96.1	48.176	0	323.31	25585000000	5479	A0A6P1H711	A0A6P1H711	2624
A0A6N4CQG2	Phage portal protein	ASJ32_21850	OTHER	Unknown	S	Phage portal protein	18.7422	18.6603	18.8226	18.6043	NaN	NaN	NaN	NaN	18.7422	18.6603	18.8226	18.6043	13.9725	13.6465	14.3374	13.2108				+	Ctrl_Extra_Fe_Extra	6.00906	0.000102197	4.91553	20.1186	24	24	6	63	63	17.5	37.42	0	323.31	2342900000	1055	A0A6N4CQG2	A0A6N4CQG2	449
A0A6N4CSH3	Glyceraldehyde-3-phosphate dehydrogenase (EC 1.2.1.-)	gap ASJ32_18495 GO994_17905	OTHER	Cytoplasmic	G	Belongs to the glyceraldehyde-3-phosphate dehydrogenase family	21.366	20.7248	20.8611	20.966	18.0787	17.8689	17.9454	17.8287	21.366	20.7248	20.8611	20.966	18.0787	17.8689	17.9454	17.8287				+	Ctrl_Extra_Fe_Extra	6.06059	0.000102197	3.04906	20.5256	65	65	65	99.7	99.7	99.7	35.035	0	323.31	203360000000	34022	A0A6N4CSH3	A0A6N4CSH3	849
A0A6N4CQ71	Ribosomal protein S12 methylthiotransferase accessory factor YcaO	ASJ32_06770	OTHER	Cytoplasmic	S	YcaO cyclodehydratase, ATP-ad Mg2+-binding	17.0787	17.1415	16.9051	17.4933	NaN	NaN	NaN	NaN	17.0787	17.1415	16.9051	17.4933	13.5725	13.4592	13.4164	13.8694				+	Ctrl_Extra_Fe_Extra	6.27612	7.86855e-05	3.57527	22.3166	42	42	42	58.2	58.2	58.2	65.978	0	323.31	7509600000	2220	A0A6N4CQ71	A0A6N4CQ71	401
A0A6N4CRL1	3-oxoacyl-ACP synthase (EC 2.3.1.41) (Beta-ketoacyl-ACP synthase I)	fabB ASJ32_06695 GO994_10810	OTHER	Cytoplasmic	IQ	Belongs to the beta-ketoacyl-ACP synthases family	18.1841	18.588	18.3513	18.3006	NaN	NaN	NaN	NaN	18.1841	18.588	18.3513	18.3006	13.233	13.5491	13.1997	12.7008				+	Ctrl_Extra_Fe_Extra	6.73195	3.44337e-05	5.18537	26.624	40	40	40	81.1	81.1	81.1	42.762	0	323.31	20827000000	5452	A0A6N4CRL1	A0A6N4CRL1	675
A0A6N4CWG4	50S ribosomal protein L19	rplS ASJ32_03760 GO994_18390	OTHER	Cytoplasmic	J	This protein is located at the 30S-50S ribosomal subunit interface and may play a role in the structure and function of the aminoacyl-tRNA binding site	20.2388	20.699	20.4408	20.6158	NaN	NaN	NaN	NaN	20.2388	20.699	20.4408	20.6158	14.1786	14.0355	13.1714	13.6317				+	Ctrl_Extra_Fe_Extra	6.7857	3.44337e-05	6.74426	27.1829	27	27	27	87	87	87	13.164	0	323.31	73831000000	9891	A0A6N4CWG4	A0A6N4CWG4	1737
A0A6N4CPJ4	Uncharacterized protein	ASJ32_08560	OTHER	Cytoplasmic	S	P2 phage tail completion protein R (GpR)	16.92	16.9391	17.0287	17.1323	NaN	NaN	NaN	NaN	16.92	16.9391	17.0287	17.1323	13.6718	13.3213	13.8385	13.4879				+	Ctrl_Extra_Fe_Extra	6.86619	3.44337e-05	3.42517	28.0418	3	3	3	34.3	34.3	34.3	19.272	0	125.78	50153000	74	A0A6N4CPJ4;A0A6N4CQ42	A0A6N4CPJ4;A0A6N4CQ42	292
Outer Membrane Vesicles
Majority protein IDs	Protein names	Gene names	SignalP	PSORTb	COG Category	eggNOG description	LFQ intensity Ctrl1_OMV	LFQ intensity Ctrl2_OMV	LFQ intensity Ctrl3_OMV	LFQ intensity Ctrl4_OMV	LFQ intensity Fe1_OMV	LFQ intensity Fe2_OMV	LFQ intensity Fe3_OMV	LFQ intensity Fe4_OMV	LFQ intensity Ctrl1_OMV Imputed	LFQ intensity Ctrl2_OMV Imputed	LFQ intensity Ctrl3_OMV Imputed	LFQ intensity Ctrl4_OMV Imputed	LFQ intensity Fe1_OMV Imputed	LFQ intensity Fe2_OMV Imputed	LFQ intensity Fe3_OMV Imputed	LFQ intensity Fe4_OMV Imputed	Only identified by site	Reverse	Potential contaminant	Student's T-test Significant Ctrl_OMV_Fe_OMV	Student's T-test significant	-Log Student's T-test p-value Ctrl_OMV_Fe_OMV	Student's T-test q-value Ctrl_OMV_Fe_OMV	Student's T-test Difference Ctrl_OMV_Fe_OMV	Student's T-test Test statistic Ctrl_OMV_Fe_OMV	Peptides	Razor + unique peptides	Unique peptides	Sequence coverage [%]	Unique + razor sequence coverage [%]	Unique sequence coverage [%]	Mol. weight [kDa]	Q-value	Score	Intensity	MS/MS count	Protein IDs	Majority protein IDs	id
A0A6N4CRE6	Ligand-gated channel protein (TonB-dependent siderophore receptor)	ASJ32_06815 GO994_12210	SP(Sec/SPI)	OuterMembrane	P	Receptor	13.5265	14.6265	13.5593	14.2808	23.8306	24.6786	24.3333	24.9831	13.5265	14.6265	13.5593	14.2808	23.8306	24.6786	24.3333	24.9831				+	Ctrl_OMV_Fe_OMV	6.90219	4.49384e-05	-10.4581	-28.4344	61	61	61	78.1	78.1	78.1	78.762	0	323.31	2558000000	1277	A0A6N4CRE6	A0A6N4CRE6	634
A5I8G1	Ligand-gated channel protein (Putative hemin receptor) (TonB-dependent hemoglobin/transferrin/lactoferrin family receptor)	hupA ASJ32_02385 GO994_09765	SP(Sec/SPI)	OuterMembrane	P	receptor	NaN	NaN	NaN	NaN	24.7489	25.365	24.893	25.5337	17.0126	17.9539	17.0895	17.1704	24.7489	25.365	24.893	25.5337				+	Ctrl_OMV_Fe_OMV	6.79165	4.49384e-05	-7.82855	-27.2455	66	66	65	77	77	77	80.389	0	323.31	3228500000	1147	A5I8G1	A5I8G1	2744
A5I8G4	Hypothetical iron regulator protein (Iron-regulated protein)	phuW ASJ32_00460 GO994_17220	LIPO(Sec/SPII)	Unknown	S	Haem-binding uptake, Tiki superfamily, ChaN	17.6831	17.2727	17.282	17.804	23.4428	24.2917	23.8512	24.2588	17.6831	17.2727	17.282	17.804	23.4428	24.2917	23.8512	24.2588				+	Ctrl_OMV_Fe_OMV	6.73388	4.49384e-05	-6.45069	-26.6439	30	30	30	66.1	66.1	66.1	35.766	0	323.31	3494700000	1073	A5I8G4	A5I8G4	2746
Q6RBX7	Colicin receptor (TonB-dependent receptor)	fstC ASJ32_11140	SP(Sec/SPI)	OuterMembrane	P	Receptor	22.3833	22.4268	23.0675	22.9185	27.3889	27.9021	27.7661	28.0309	22.3833	22.4268	23.0675	22.9185	27.3889	27.9021	27.7661	28.0309				+	Ctrl_OMV_Fe_OMV	6.34357	7.35935e-05	-5.07297	-22.9079	87	87	87	83.6	83.6	83.6	71.655	0	323.31	65832000000	13376	Q6RBX7	Q6RBX7	2838
A0A6N4CQV6	Ligand-gated channel protein	ASJ32_06030	SP(Sec/SPI)	OuterMembrane	M	TonB dependent receptor	17.7393	17.9939	18.5764	18.5802	23.5681	24.2203	23.6738	24.2039	17.7393	17.9939	18.5764	18.5802	23.5681	24.2203	23.6738	24.2039				+	Ctrl_OMV_Fe_OMV	6.10217	8.5536e-05	-5.69406	-20.8598	76	76	76	82.5	82.5	82.5	75.351	0	323.31	3163400000	1751	A0A6N4CQV6	A0A6N4CQV6	529
Q6RBX6	Ligand-gated channel protein (Putative heme receptor) (Putative outer-membrane heme receptor)	hupA hutA ASJ32_00465	SP(Sec/SPI)	OuterMembrane	P	TonB dependent receptor	19.0424	16.8461	16.7619	17.077	28.2832	28.7139	28.5423	28.4228	19.0424	16.8461	16.7619	17.077	28.2832	28.7139	28.5423	28.4228				+	Ctrl_OMV_Fe_OMV	6.01393	9.09863e-05	-11.0587	-20.1567	108	108	108	93.3	93.3	93.3	76.971	0	323.31	72402000000	12985	Q6RBX6	Q6RBX6	2837
A0A6N4CUK1	Diguanylate cyclase	ASJ32_12545	OTHER	CytoplasmicMembrane	KT	Motif C-terminal to PAS motifs (likely to contribute to PAS structural domain)	NaN	NaN	NaN	NaN	24.4091	24.3282	23.9423	23.4944	16.1939	16.931	15.701	17.0787	24.4091	24.3282	23.9423	23.4944				+	Ctrl_OMV_Fe_OMV	5.95035	9.09863e-05	-7.5673	-19.6645	30	30	30	45.8	45.8	45.8	79.976	0	323.31	244030000	228	A0A6N4CUK1	A0A6N4CUK1	1329
A0A6N4CW88	Putative histamine N-monooxygenase (Rhizobactin siderophore biosynthesis protein RhbE)	basC ASJ32_09660 GO994_22185	OTHER	Cytoplasmic	Q	l-lysine 6-monooxygenase	NaN	NaN	NaN	NaN	25.2381	25.5705	25.3035	24.7393	16.6387	16.8845	15.7485	14.9323	25.2381	25.5705	25.3035	24.7393				+	Ctrl_OMV_Fe_OMV	5.88346	9.09863e-05	-9.16189	-19.1593	40	40	40	62.7	62.7	62.7	49.683	0	323.31	10586000000	1935	A0A6N4CW88	A0A6N4CW88	1698
A0A6N4CQ09	Iron ABC transporter substrate-binding protein	ASJ32_14785	SP(Sec/SPI)	Unknown	P	Periplasmic binding protein	NaN	NaN	NaN	NaN	20.6607	20.6617	20.9398	20.4905	16.9727	16.178	16.2541	15.9861	20.6607	20.6617	20.9398	20.4905				+	Ctrl_OMV_Fe_OMV	5.78921	9.89081e-05	-4.34044	-18.4688	25	25	25	57.6	57.6	57.6	40.751	0	302.88	629760000	290	A0A6N4CQ09	A0A6N4CQ09	368
A0A6N4CZH3	ABC transporter ATP-binding protein (ATP-binding cassette domain-containing protein)	ASJ32_09675 GO994_22170	OTHER	CytoplasmicMembrane	V	ABC transporter transmembrane region	NaN	NaN	NaN	NaN	23.1538	22.8169	22.3546	21.8048	16.9035	17.2829	16.7206	16.5546	23.1538	22.8169	22.3546	21.8048				+	Ctrl_OMV_Fe_OMV	5.58846	0.000132233	-5.66709	-17.0775	39	39	39	54.5	54.5	54.5	64.887	0	323.31	7300800000	1053	A0A6N4CZH3	A0A6N4CZH3	2344
A0A6P1HDL3	2,3-dihydro-2,3-dihydroxybenzoate dehydrogenase (EC 1.3.1.28)	dhbA ASJ32_11180 GO994_14100	OTHER	Cytoplasmic	IQ	involved in the biosynthesis of siderophores, enterobactin, bacillibactin or vibriobactin	NaN	NaN	NaN	NaN	18.5497	18.8356	18.6361	18.4878	16.4925	16.5232	16.635	16.8924	18.5497	18.8356	18.6361	18.4878				+	Ctrl_OMV_Fe_OMV	5.55125	0.000135242	-1.99155	-16.831	24	24	24	100	100	100	25.893	0	323.31	6095700000	888	A0A6P1HDL3	A0A6P1HDL3	2726
A0A6N4CYF4	Outer-membrane lipoprotein carrier protein	lolA ASJ32_11810	SP(Sec/SPI)	Periplasmic	M	Participates in the translocation of lipoproteins from the inner membrane to the outer membrane. Only forms a complex with a lipoprotein if the residue after the N-terminal Cys is not an aspartate (The Asp acts as a targeting signal to indicate that the lipoprotein should stay in the inner membrane)	19.8355	19.9079	19.9193	19.492	21.5339	21.6836	21.6037	21.7598	19.8355	19.9079	19.9193	19.492	21.5339	21.6836	21.6037	21.7598				+	Ctrl_OMV_Fe_OMV	5.51502	0.000135242	-1.85656	-16.5943	21	21	21	84.2	84.2	84.2	22.88	0	323.31	1357200000	672	A0A6N4CYF4	A0A6N4CYF4	2146
A0A6N4CZU3	Uncharacterized protein	ASJ32_02400	LIPO(Sec/SPII)	Unknown	N	Protein of unknown function (DUF1566)	NaN	NaN	NaN	NaN	23.2203	24.0414	24.1245	23.7393	17.0529	17.508	15.7078	16.375	23.2203	24.0414	24.1245	23.7393				+	Ctrl_OMV_Fe_OMV	5.42894	0.000157721	-7.12045	-16.0446	19	19	19	54.8	54.8	54.8	49.417	0	323.31	1906500000	458	A0A6N4CZU3	A0A6N4CZU3	2403
A0A6N4CZ72	Peptidase M36	ASJ32_02395	SP(Sec/SPI)	Unknown	O	Proprotein convertase P-domain	NaN	NaN	NaN	NaN	24.2745	25.6517	24.7032	25.3412	16.7992	17.8383	16.5105	18.1227	24.2745	25.6517	24.7032	25.3412				+	Ctrl_OMV_Fe_OMV	5.31824	0.000168079	-7.67497	-15.3634	49	49	49	64.9	64.9	64.9	88.374	0	323.31	2582800000	901	A0A6N4CZ72	A0A6N4CZ72	2291
A0A6N4CQ91	Transporter	ASJ32_21700	LIPO(Sec/SPII)	Periplasmic	S	BON domain	NaN	NaN	NaN	NaN	18.8911	18.6999	18.5461	19.1385	16.8006	16.6291	16.5935	16.7883	18.8911	18.6999	18.5461	19.1385				+	Ctrl_OMV_Fe_OMV	5.30413	0.000168079	-2.11603	-15.2785	3	3	3	38.8	38.8	38.8	10.843	0	32.464	3156200	15	A0A6N4CQ91	A0A6N4CQ91	414
A0A6N4CZ16	Flagellin	ASJ32_02215 GO994_09950	OTHER	Extracellular	N	Flagellin is the subunit protein which polymerizes to form the filaments of bacterial flagella	NaN	NaN	NaN	NaN	21.1639	20.7866	20.5605	21.2398	17.3232	16.2903	16.7796	16.9793	21.1639	20.7866	20.5605	21.2398				+	Ctrl_OMV_Fe_OMV	5.2977	0.000168079	-4.09457	-15.2401	4	4	4	24.1	24.1	24.1	32.091	0.0050287	1.468	12969000	9	A0A6N4CZ16;B3TZ68	A0A6N4CZ16	2261
A0A6N4CZQ9	Lytic transglycosylase	ASJ32_02860	LIPO(Sec/SPII)	OuterMembrane	M	Transglycosylase SLT domain	NaN	16.7441	16.8582	17.1824	19.6651	19.6932	19.5761	19.6007	16.2786	16.7441	16.8582	17.1824	19.6651	19.6932	19.5761	19.6007				+	Ctrl_OMV_Fe_OMV	5.28592	0.000168079	-2.86793	-15.1698	31	31	31	69.5	69.5	69.5	58	0	323.31	556620000	493	A0A6N4CZQ9	A0A6N4CZQ9	2386
A0A6N4CYU6	Uncharacterized protein	ASJ32_01775 GO994_13675	LIPO(Sec/SPII)	Unknown	/	/	23.3991	23.4491	23.4135	23.3546	25.097	25.2056	24.8571	25.4052	23.3991	23.4491	23.4135	23.3546	25.097	25.2056	24.8571	25.4052				+	Ctrl_OMV_Fe_OMV	5.25622	0.00017417	-1.73716	-14.9939	40	40	40	88.3	88.3	88.3	34.438	0	323.31	5155200000	3096	A0A6N4CYU6	A0A6N4CYU6	2223
A0A6N4CQR8	Tol-Pal system protein TolB	tolB ASJ32_04145	SP(Sec/SPI)	Periplasmic	U	Involved in the TonB-independent uptake of proteins	24.8125	24.876	24.6482	24.7258	26.5267	26.2862	26.6055	26.8533	24.8125	24.876	24.6482	24.7258	26.5267	26.2862	26.6055	26.8533				+	Ctrl_OMV_Fe_OMV	5.11579	0.000213156	-1.80232	-14.1884	51	51	51	70.5	70.5	70.5	48.181	0	323.31	15002000000	6225	A0A6N4CQR8	A0A6N4CQR8	503
A0A6N4CQU5	Multidrug transporter	ASJ32_20930	LIPO(Sec/SPII)	OuterMembrane	M	TIGRFAM RND efflux system, outer membrane lipoprotein, NodT family	22.31	21.9669	21.6668	22.3399	24.6952	25.0892	24.7499	25.2089	22.31	21.9669	21.6668	22.3399	24.6952	25.0892	24.7499	25.2089				+	Ctrl_OMV_Fe_OMV	5.1029	0.000213478	-2.86491	-14.1166	36	36	36	58.8	58.8	58.8	50.515	0	323.31	3358200000	1064	A0A6N4CQU5	A0A6N4CQU5	521
A0A6N4D0E4	DUF1566 domain-containing protein	ASJ32_02405 GO994_09745	SP(Sec/SPI)	Unknown	KLT	Protein of unknown function (DUF1566)	NaN	NaN	NaN	NaN	22.9871	23.4408	23.7495	23.37	17.8974	17.325	17.5717	16.0032	22.9871	23.4408	23.7495	23.37				+	Ctrl_OMV_Fe_OMV	5.0694	0.000224367	-6.18749	-13.9315	16	16	16	67.6	67.6	67.6	20.462	0	323.31	964630000	416	A0A6N4D0E4	A0A6N4D0E4	2497
A0A6N4CY59	DUF2066 domain-containing protein	ASJ32_12290 GO994_14855	SP(Sec/SPI)	Unknown	S	Uncharacterized protein conserved in bacteria (DUF2066)	21.0546	20.5826	20.3598	20.8337	23.0521	23.3594	23.263	23.6306	21.0546	20.5826	20.3598	20.8337	23.0521	23.3594	23.263	23.6306				+	Ctrl_OMV_Fe_OMV	5.00581	0.000246426	-2.61859	-13.5864	24	24	24	65.8	65.8	65.8	36.43	0	323.31	1199400000	1050	A0A6N4CY59	A0A6N4CY59	2086
A0A0K0MDU1	ABC transporter substrate-binding protein (Amonabactin ABC transporter substrate-binding protein)	ASJ32_11165 GO994_14085	SP(Sec/SPI)	Periplasmic	P	Periplasmic binding protein	NaN	NaN	NaN	NaN	21.4803	21.2414	21.2642	21.5203	16.827	17.613	16.5704	15.8774	21.4803	21.2414	21.2642	21.5203				+	Ctrl_OMV_Fe_OMV	4.84162	0.00032619	-4.65457	-12.7325	20	20	20	41.7	41.7	41.7	33.621	0	323.31	589950000	258	A0A0K0MDU1	A0A0K0MDU1	4
A0A6N4CYM8	ABC transporter substrate-binding protein (Ferric anguibactin-binding protein)	ASJ32_09700 GO994_22145	LIPO(Sec/SPII)	Unknown	P	Periplasmic binding protein	NaN	NaN	NaN	NaN	24.8788	24.3212	25.3636	24.6043	16.1483	18.4479	17.7319	16.2452	24.8788	24.3212	25.3636	24.6043				+	Ctrl_OMV_Fe_OMV	4.81114	0.000341952	-7.64865	-12.5796	32	32	32	82.4	82.4	82.4	35.811	0	323.31	20715000000	1726	A0A6N4CYM8	A0A6N4CYM8	2187
A0A6N4CVL4	Divalent metal cation transporter MntH	mntH ASJ32_03945	OTHER	CytoplasmicMembrane	P	H( )-stimulated, divalent metal cation uptake system	NaN	NaN	NaN	NaN	21.2102	20.3619	20.4652	20.673	16.9344	16.735	15.4939	16.4231	21.2102	20.3619	20.4652	20.673				+	Ctrl_OMV_Fe_OMV	4.59687	0.000466697	-4.28097	-11.5523	5	5	5	8.4	8.4	8.4	43.119	0	39.908	48927000	19	A0A6N4CVL4	A0A6N4CVL4	1555
A0A6N4CZY7	Peptidase M13	ASJ32_01430	LIPO(Sec/SPII)	Unknown	O	peptidase, M13	23.9056	24.1136	23.9983	23.7538	25.2053	25.1545	25.1655	25.5172	23.9056	24.1136	23.9983	23.7538	25.2053	25.1545	25.1655	25.5172				+	Ctrl_OMV_Fe_OMV	4.57759	0.000468393	-1.31778	-11.4638	75	75	75	73.8	73.8	73.8	75.317	0	323.31	11470000000	3781	A0A6N4CZY7	A0A6N4CZY7	2430
A0A6N4CXB2	Extracellular solute-binding protein (Iron ABC transporter substrate-binding protein)	ASJ32_03665 GO994_18485	SP(Sec/SPI)	Periplasmic	P	Iron binding protein FbpA	20.0299	19.9746	20.1243	19.5762	22.0658	22.8281	22.5154	22.9875	20.0299	19.9746	20.1243	19.5762	22.0658	22.8281	22.5154	22.9875				+	Ctrl_OMV_Fe_OMV	4.54501	0.00048997	-2.67295	-11.3157	49	49	49	89.3	89.3	89.3	37.316	0	323.31	11559000000	3021	A0A6N4CXB2	A0A6N4CXB2	1916
A0A6N4CST9	ABC transporter ATP-binding protein	ASJ32_20665 GO994_03630	OTHER	Cytoplasmic	S	of ABC transporters with duplicated ATPase domains	NaN	NaN	NaN	NaN	19.9523	19.7296	20.1011	20.2847	17.3699	17.0461	16.709	16.1619	19.9523	19.7296	20.1011	20.2847				+	Ctrl_OMV_Fe_OMV	4.53496	0.00048997	-3.19518	-11.2703	35	35	35	47	47	47	70.668	0	323.31	897560000	565	A0A6N4CST9	A0A6N4CST9	922
A0A6N4CUN8	Transcriptional regulator	ASJ32_01260	LIPO(Sec/SPII)	Periplasmic	S	Maltose operon periplasmic protein precursor (MalM)	24.992	24.9033	24.7801	25.3344	26.5288	26.8179	26.8548	27.1267	24.992	24.9033	24.7801	25.3344	26.5288	26.8179	26.8548	27.1267				+	Ctrl_OMV_Fe_OMV	4.41161	0.000639305	-1.8296	-10.7273	25	25	25	80.7	80.7	80.7	33.984	0	323.31	12276000000	2477	A0A6N4CUN8	A0A6N4CUN8	1356
A0A6N4D032	Ligand-gated channel	ASJ32_09730	SP(Sec/SPI)	OuterMembrane	P	TonB dependent receptor	21.2701	21.4933	21.7244	21.9837	23.976	24.9403	24.1762	24.5798	21.2701	21.4933	21.7244	21.9837	23.976	24.9403	24.1762	24.5798				+	Ctrl_OMV_Fe_OMV	4.38629	0.000639305	-2.80021	-10.6188	50	50	50	74.2	74.2	74.2	77.45	0	323.31	6526100000	3221	A0A6N4D032	A0A6N4D032	2450
A0A6N4CSR2	Leucine ABC transporter substrate-binding protein	ASJ32_15390	SP(Sec/SPI)	Periplasmic	E	Leucine ABC transporter subunit substrate-binding protein LivK	19.1688	19.207	19.1949	18.8355	20.7263	21.308	21.0488	21.5207	19.1688	19.207	19.1949	18.8355	20.7263	21.308	21.0488	21.5207				+	Ctrl_OMV_Fe_OMV	4.38548	0.000639305	-2.04943	-10.6154	40	40	40	86.6	86.6	86.6	38.954	0	323.31	2767200000	1136	A0A6N4CSR2	A0A6N4CSR2	902
A0A6N4CUJ9	Endolytic peptidoglycan transglycosylase RlpA (EC 4.2.2.-)	rlpA ASJ32_16985	LIPO(Sec/SPII)	Unknown	M	Lytic transglycosylase with a strong preference for naked glycan strands that lack stem peptides	22.2383	22.0433	22.0398	22.4202	23.8775	23.9155	24.0266	24.5465	22.2383	22.0433	22.0398	22.4202	23.8775	23.9155	24.0266	24.5465				+	Ctrl_OMV_Fe_OMV	4.38411	0.000639305	-1.90613	-10.6095	30	30	30	74.4	74.4	74.4	33.815	0	323.31	2680500000	1401	A0A6N4CUJ9	A0A6N4CUJ9	1327
A0A6N4CUW7	Uncharacterized protein	ASJ32_05030 GO994_04440	LIPO(Sec/SPII)	Unknown	-	-	25.7673	25.8901	25.5724	25.4662	27.27	27.8746	27.3148	27.7782	25.7673	25.8901	25.5724	25.4662	27.27	27.8746	27.3148	27.7782				+	Ctrl_OMV_Fe_OMV	4.31783	0.000709885	-1.88541	-10.3305	11	11	11	66.5	66.5	66.5	17.484	0	323.31	7578600000	3130	A0A6N4CUW7	A0A6N4CUW7	1408
A0A6N4CXW4	Iron ABC transporter ATP-binding protein	ASJ32_09695	OTHER	CytoplasmicMembrane	P	ATPases associated with a variety of cellular activities	NaN	NaN	NaN	NaN	21.3856	19.9971	20.7907	20.7157	15.9061	16.8173	17.251	16.5119	21.3856	19.9971	20.7907	20.7157				+	Ctrl_OMV_Fe_OMV	4.29304	0.000729469	-4.10073	-10.2279	22	22	22	64.2	64.2	64.2	28.685	0	242.79	449640000	133	A0A6N4CXW4	A0A6N4CXW4	2035
A0A6N4CTK4	Maltodextrin-binding protein	malE ASJ32_02365	LIPO(Sec/SPII)	Periplasmic	G	Bacterial extracellular solute-binding protein	21.4049	21.4581	21.791	21.7016	22.549	22.8448	22.7386	22.669	21.4049	21.4581	21.791	21.7016	22.549	22.8448	22.7386	22.669				+	Ctrl_OMV_Fe_OMV	4.21643	0.000821848	-1.11147	-9.91658	44	44	44	80.4	80.4	80.4	42.128	0	323.31	3539400000	1659	A0A6N4CTK4	A0A6N4CTK4	1108
A0A6N4CPS7	Protein TonB	ASJ32_21990 GO994_21980	OTHER	Unknown	U	Interacts with outer membrane receptor proteins that carry out high-affinity binding and energy dependent uptake into the periplasmic space of specific substrates. It could act to transduce energy from the cytoplasmic membrane to specific energy- requiring processes in the outer membrane, resulting in the release into the periplasm of ligands bound by these outer membrane proteins	NaN	NaN	NaN	17.7087	21.9364	21.0763	20.9779	20.8893	16.6382	16.8082	15.8142	17.7087	21.9364	21.0763	20.9779	20.8893				+	Ctrl_OMV_Fe_OMV	4.18361	0.000874237	-4.47769	-9.7858	13	13	13	41.4	41.4	41.4	23.654	0	323.31	757310000	251	A0A6N4CPS7	A0A6N4CPS7	331
A0A6N4CN90	Energy transducer TonB	ASJ32_22005	SP(Sec/SPI)	CytoplasmicMembrane	U	MotA TolQ ExbB proton channel	19.6326	19.6771	20.956	20.8734	24.1973	23.5958	24.2252	24.1517	19.6326	19.6771	20.956	20.8734	24.1973	23.5958	24.2252	24.1517				+	Ctrl_OMV_Fe_OMV	4.12173	0.000977714	-3.75777	-9.54351	43	43	43	54.8	54.8	54.8	45.975	0	323.31	7801400000	1433	A0A6N4CN90	A0A6N4CN90	157
A0A6N4CRD3	Uncharacterized protein	ASJ32_05365 GO994_19455	SP(Sec/SPI)	Unknown	/	/	22.2818	22.0741	21.3538	21.7219	23.8813	24.1028	24.0955	24.527	22.2818	22.0741	21.3538	21.7219	23.8813	24.1028	24.0955	24.527				+	Ctrl_OMV_Fe_OMV	4.0775	0.00103249	-2.29374	-9.3736	28	28	28	83.3	83.3	83.3	25.675	0	323.31	1592200000	754	A0A6N4CRD3	A0A6N4CRD3	625
A0A6N4CXV2	Isochorismate synthase (EC 5.4.4.2)	ASJ32_11200	OTHER	Cytoplasmic	HQ	chorismate binding enzyme	NaN	NaN	NaN	NaN	19.6551	19.5642	20.2157	19.2106	17.2997	17.6565	16.9505	17.3704	19.6551	19.5642	20.2157	19.2106				+	Ctrl_OMV_Fe_OMV	4.03956	0.00109777	-2.34211	-9.23	35	35	35	66.6	66.6	66.6	41.813	0	323.31	13174000000	1460	A0A6N4CXV2	A0A6N4CXV2	2028
A0A6N4CZ97	YceI domain-containing protein	ASJ32_02640 GO994_09495	SP(Sec/SPI)	Unknown	S	Belongs to the UPF0312 family	17.2621	NaN	18.5765	17.2057	21.4979	21.923	22.5316	22.8463	17.2621	16.3944	18.5765	17.2057	21.4979	21.923	22.5316	22.8463				+	Ctrl_OMV_Fe_OMV	3.95243	0.00126366	-4.84002	-8.90757	14	14	14	76.3	76.3	76.3	20.271	0	323.31	166810000	241	A0A6N4CZ97	A0A6N4CZ97	2306
A0A6N4CS83	META domain-containing protein	ASJ32_19305	LIPO(Sec/SPII)	Unknown	O	response to heat	24.3372	24.6492	24.5308	24.7139	26.0352	25.9463	25.6625	26.3519	24.3372	24.6492	24.5308	24.7139	26.0352	25.9463	25.6625	26.3519				+	Ctrl_OMV_Fe_OMV	3.91449	0.00133254	-1.44122	-8.77029	13	13	13	59.1	59.1	59.1	13.65	0	323.31	5657800000	3726	A0A6N4CS83	A0A6N4CS83	793
B2REF2	Uncharacterized protein	ASJ32_21745	OTHER	CytoplasmicMembrane	T	PAAR repeat-containing protein	NaN	NaN	NaN	NaN	19.6643	19.7305	20.3237	19.4912	16.2447	15.4893	16.5919	17.2229	19.6643	19.7305	20.3237	19.4912				+	Ctrl_OMV_Fe_OMV	3.82422	0.00153679	-3.41524	-8.45107	26	26	26	67	67	67	55.827	0	323.31	3113000000	1332	B2REF2	B2REF2	2755
A0A6N4CZ10	Non ribosomal peptide synthetase BasB	ASJ32_09665 GO994_22180	OTHER	CytoplasmicMembrane	Q	Evidence 3 Function proposed based on presence of conserved amino acid motif, structural feature or limited homology	NaN	NaN	NaN	NaN	20.9306	21.9727	22.2229	21.7383	16.9837	17.933	18.2693	16.3844	20.9306	21.9727	22.2229	21.7383				+	Ctrl_OMV_Fe_OMV	3.80744	0.00154842	-4.32353	-8.39286	51	51	51	72.6	72.6	72.6	81.319	0	323.31	32415000000	1833	A0A6N4CZ10	A0A6N4CZ10	2257
A0A6N4CPZ7	Biopolymer transporter ExbD	ASJ32_21995 GO994_21985	OTHER	CytoplasmicMembrane	U	biopolymer transport protein	NaN	NaN	NaN	NaN	21.4853	20.196	21.1607	21.2125	18.1206	16.773	16.4577	16.4527	21.4853	20.196	21.1607	21.2125				+	Ctrl_OMV_Fe_OMV	3.79381	0.00158167	-4.06263	-8.34581	11	11	11	55.6	55.6	55.6	14.721	0	296.4	936210000	274	A0A6N4CPZ7	A0A6N4CPZ7	362
A0A6N4CZ48	Nickel transporter	ASJ32_02290	SP(Sec/SPI)	Periplasmic	ET	Belongs to the bacterial solute-binding protein 3 family	20.3237	20.4881	19.6155	19.7375	21.7462	22.1202	22.3245	22.0228	20.3237	20.4881	19.6155	19.7375	21.7462	22.1202	22.3245	22.0228				+	Ctrl_OMV_Fe_OMV	3.74513	0.00173424	-2.01226	-8.17969	44	44	44	84.8	84.8	84.8	28.483	0	323.31	5697300000	2356	A0A6N4CZ48	A0A6N4CZ48	2278
A0A6N4D025	ABC transporter ATP-binding protein (ATP-binding cassette domain-containing protein)	ASJ32_09680 GO994_22165	OTHER	CytoplasmicMembrane	V	(ABC) transporter	NaN	NaN	NaN	NaN	21.5402	20.8189	20.9633	20.372	17.0747	17.6518	16.2655	15.4472	21.5402	20.8189	20.9633	20.372				+	Ctrl_OMV_Fe_OMV	3.69851	0.00184253	-4.3138	-8.02326	45	44	44	67.6	66.7	66.7	63.274	0	323.31	7171300000	770	A0A6N4D025	A0A6N4D025	2446
A0A6N4CQQ6	C4-dicarboxylate ABC transporter substrate-binding protein	ASJ32_06510	SP(Sec/SPI)	Unknown	S	NMT1-like family	21.7945	21.8056	21.2645	21.3026	22.7787	23.4701	23.2536	23.3619	21.7945	21.8056	21.2645	21.3026	22.7787	23.4701	23.2536	23.3619				+	Ctrl_OMV_Fe_OMV	3.64556	0.00198461	-1.67427	-7.84869	45	45	45	73.7	73.7	73.7	34.433	0	323.31	10752000000	3686	A0A6N4CQQ6	A0A6N4CQQ6	495
A0A6N4CV62	LppC family lipoprotein	ASJ32_16510	OTHER	Unknown	M	LppC putative lipoprotein	24.0907	24.1796	24.2439	24.6967	25.4184	25.4267	25.6714	25.3922	24.0907	24.1796	24.2439	24.6967	25.4184	25.4267	25.6714	25.3922				+	Ctrl_OMV_Fe_OMV	3.641	0.00198763	-1.17447	-7.83382	39	39	39	81.3	81.3	81.3	64.677	0	323.31	5779700000	2536	A0A6N4CV62	A0A6N4CV62	1460
A0A6N4CTD3	Uncharacterized protein	ASJ32_19455	SP(Sec/SPI)	CytoplasmicMembrane	P	NLPA lipoprotein	20.7727	20.5087	20.3136	20.4873	21.6256	21.8813	21.9859	22.4183	20.7727	20.5087	20.3136	20.4873	21.6256	21.8813	21.9859	22.4183				+	Ctrl_OMV_Fe_OMV	3.58466	0.00220396	-1.45716	-7.65187	24	24	24	76.1	76.1	76.1	30.038	0	323.31	2143900000	1099	A0A6N4CTD3	A0A6N4CTD3	1055
A0A6N4CXM0	DUF3466 family protein	ASJ32_12960 GO994_11460	SP(Sec/SPI)	Extracellular	S	Protein of unknown function (DUF3466)	25.7053	25.808	26.2421	26.2405	27.35	28.1281	27.5561	28.0091	25.7053	25.808	26.2421	26.2405	27.35	28.1281	27.5561	28.0091				+	Ctrl_OMV_Fe_OMV	3.56378	0.00228688	-1.76183	-7.58536	51	51	51	85.1	85.1	85.1	58.666	0	323.31	41334000000	9186	A0A6N4CXM0	A0A6N4CXM0	1977
Q6SLH5	Ferric siderophore receptor (Ferric siderophore receptor B) (Ligand-gated channel protein)	fstB fstA ASJ32_09705	SP(Sec/SPI)	OuterMembrane	P	TonB dependent receptor	20.5519	10.7282	12.3707	13.0103	30.2136	30.6624	30.6125	30.633	20.5519	10.7282	12.3707	13.0103	30.2136	30.6624	30.6125	30.633				+	Ctrl_OMV_Fe_OMV	3.53347	0.00235406	-16.3651	-7.48967	106	106	106	92	92	92	88.281	0	323.31	174680000000	24060	Q6SLH5	Q6SLH5	2839
A0A6N4CVD7	Uncharacterized protein	ASJ32_11210	SP(Sec/SPI)	Unknown	O	Highly conserved protein containing a thioredoxin domain	19.2138	19.8077	18.9984	17.7763	22.1155	22.6831	22.3535	23.2864	19.2138	19.8077	18.9984	17.7763	22.1155	22.6831	22.3535	23.2864				+	Ctrl_OMV_Fe_OMV	3.49591	0.00248734	-3.6606	-7.3725	44	44	44	55.6	55.6	55.6	70.602	0	323.31	3930600000	1957	A0A6N4CVD7	A0A6N4CVD7	1505
A0A6N4D027	Uncharacterized protein	ASJ32_00925	SP(Sec/SPI)	Unknown	S	Protein of unknown function (DUF3157)	NaN	NaN	18.7043	NaN	20.9251	21.7208	21.1864	21.9948	18.1159	16.7174	18.7043	17.0309	20.9251	21.7208	21.1864	21.9948				+	Ctrl_OMV_Fe_OMV	3.46535	0.00254649	-3.81463	-7.27825	12	12	12	74.7	74.7	74.7	20.036	0	156.53	175930000	162	A0A6N4D027	A0A6N4D027	2448
A0A6N4CVH0	Lipase	ASJ32_15345	LIPO(Sec/SPII)	Extracellular	I	Bacterial virulence factor lipase N-terminal	24.35	24.2086	24.0249	23.8185	25.0583	25.5593	25.4021	25.735	24.35	24.2086	24.0249	23.8185	25.0583	25.5593	25.4021	25.735				+	Ctrl_OMV_Fe_OMV	3.45984	0.00255945	-1.3382	-7.26138	42	42	42	68.4	68.4	68.4	82.553	0	323.31	9891500000	5056	A0A6N4CVH0	A0A6N4CVH0	1528
A0A6N4CV98	Methylcrotonoyl-CoA carboxylase	ASJ32_16750	OTHER	Cytoplasmic	I	Carboxyl transferase domain	NaN	NaN	NaN	NaN	19.9038	19.9812	20.1076	20.2978	17.6473	17.5336	16.0825	15.987	19.9038	19.9812	20.1076	20.2978				+	Ctrl_OMV_Fe_OMV	3.41116	0.00282028	-3.26003	-7.11363	8	8	8	30.1	30.1	30.1	57.589	0	79.999	166570000	125	A0A6N4CV98	A0A6N4CV98	1481
A0A6N4CZZ7	Peptidyl-prolyl cis-trans isomerase (PPIase) (EC 5.2.1.8)	ASJ32_01075 GO994_06585	SP(Sec/SPI)	Unknown	M	PPIases accelerate the folding of proteins. It catalyzes the cis-trans isomerization of proline imidic peptide bonds in oligopeptides	21.4486	21.4226	20.341	21.1004	22.8748	23.567	22.9907	23.4476	21.4486	21.4226	20.341	21.1004	22.8748	23.567	22.9907	23.4476				+	Ctrl_OMV_Fe_OMV	3.35221	0.0031141	-2.14185	-6.93798	15	15	15	68.9	68.9	68.9	20.032	0	323.31	1905500000	695	A0A6N4CZZ7	A0A6N4CZZ7	2435
A0A6N4CSX7	Uncharacterized protein	ASJ32_17560	SP(Sec/SPI)	Unknown	P	Protein of unknown function (DUF2796)	21.8838	21.522	21.1292	20.8039	23.499	23.0825	23.8638	24.2177	21.8838	21.522	21.1292	20.8039	23.499	23.0825	23.8638	24.2177				+	Ctrl_OMV_Fe_OMV	3.3369	0.00317186	-2.33105	-6.89294	11	11	11	42.6	42.6	42.6	20.193	0	323.31	5050100000	1047	A0A6N4CSX7	A0A6N4CSX7	948
A0A6N4CLI6	Uncharacterized protein	ASJ32_21985 GO994_21975	LIPO(Sec/SPII)	Unknown	G	Modulates cellular lipopolysaccharide (LPS) levels by regulating LpxC, which is involved in lipid A biosynthesis. May act by modulating the proteolytic activity of FtsH towards LpxC. May also coordinate assembly of proteins involved in LPS synthesis at the plasma membrane	NaN	NaN	NaN	NaN	21.8723	20.3007	20.946	20.2353	17.1367	17.5808	16.4098	15.389	21.8723	20.3007	20.946	20.2353				+	Ctrl_OMV_Fe_OMV	3.33496	0.00317186	-4.2095	-6.88724	41	41	41	85.7	85.7	85.7	44.183	0	323.31	2338600000	768	A0A6N4CLI6	A0A6N4CLI6	65
A5I8G9	ABC transporter substrate-binding protein (Hemin ABC transporter periplasmic HutB) (Hemin receptor)	hutB ASJ32_00435 GO994_17245	SP(Sec/SPI)	Periplasmic	P	ABC-type hemin transport system, periplasmic component	NaN	NaN	NaN	NaN	20.2619	19.3566	19.6281	19.2501	17.1986	17.0788	17.7395	16.3114	20.2619	19.3566	19.6281	19.2501				+	Ctrl_OMV_Fe_OMV	3.31854	0.00327102	-2.54212	-6.83924	17	17	17	62	62	62	29.043	0	323.31	1623000000	406	A5I8G9	A5I8G9	2750
A0A6N4D004	Uncharacterized protein	ASJ32_00320 GO994_17360	LIPO(Sec/SPII)	Unknown	/	/	NaN	NaN	NaN	NaN	20.0692	20.9969	20.0909	20.925	18.2884	17.0046	16.3661	17.4779	20.0692	20.9969	20.0909	20.925				+	Ctrl_OMV_Fe_OMV	3.29315	0.00337537	-3.23628	-6.76554	8	8	8	62.9	62.9	62.9	12.792	0	323.31	683830000	241	A0A6N4D004	A0A6N4D004	2437
A0A6P1H472	Protein-methionine-sulfoxide reductase catalytic subunit MsrP (EC 1.8.5.-)	msrP ASJ32_07440 GO994_01555	TAT(Tat/SPI)	Unknown	C	Part of the MsrPQ system that repairs oxidized periplasmic proteins containing methionine sulfoxide residues (Met-O), using respiratory chain electrons. Thus protects these proteins from oxidative-stress damage caused by reactive species of oxygen and chlorine generated by the host defense mechanisms. MsrPQ is essential for the maintenance of envelope integrity under bleach stress, rescuing a wid…	NaN	NaN	NaN	NaN	20.5195	21.0203	20.4654	20.942	16.3198	16.7511	18.5828	16.2687	20.5195	21.0203	20.4654	20.942				+	Ctrl_OMV_Fe_OMV	3.25966	0.00352757	-3.75623	-6.66927	10	10	10	30.8	30.8	30.8	37.436	0	203.61	314210000	311	A0A6P1H472	A0A6P1H472	2579
A0A6N4CPH8	Uncharacterized protein	ASJ32_07455 GO994_01535	LIPO(Sec/SPII)	Unknown	-	-	23.7686	23.5889	23.4152	23.4753	24.6077	25.4121	24.8493	24.6742	23.7686	23.5889	23.4152	23.4753	24.6077	25.4121	24.8493	24.6742				+	Ctrl_OMV_Fe_OMV	3.25924	0.00352757	-1.32382	-6.66808	24	24	24	84.2	84.2	84.2	19.211	0	323.31	2227400000	968	A0A6N4CPH8	A0A6N4CPH8	282
A0A6N4D114	Uncharacterized protein	ASJ32_01425 GO994_06935	SP(Sec/SPI)	Unknown	S	Periplasmic lysozyme inhibitor of I-type lysozyme	NaN	NaN	NaN	NaN	21.0623	20.8657	21.1032	21.5356	15.8052	16.5941	17.8479	18.3727	21.0623	20.8657	21.1032	21.5356				+	Ctrl_OMV_Fe_OMV	3.24595	0.00361343	-3.98672	-6.63019	11	11	11	82.8	82.8	82.8	15.557	0	323.31	826030000	256	A0A6N4D114	A0A6N4D114	2537
A0A6N4CR11	DUF1311 domain-containing protein	ASJ32_20630 GO994_03590	LIPO(Sec/SPII)	Unknown	S	protein conserved in bacteria	19.213	19.0603	19.0113	18.9485	20.6	21.2808	20.3658	21.6489	19.213	19.0603	19.0113	18.9485	20.6	21.2808	20.3658	21.6489				+	Ctrl_OMV_Fe_OMV	3.14	0.0043826	-1.91559	-6.33419	22	22	22	80.8	80.8	80.8	21.481	0	323.31	1126800000	506	A0A6N4CR11	A0A6N4CR11	557
A0A6N4CVC9	Peptide ABC transporter substrate-binding protein	ASJ32_16905	SP(Sec/SPI)	Periplasmic	E	Bacterial extracellular solute-binding proteins, family 5 Middle	NaN	17.4626	NaN	NaN	18.5041	19.4832	19.6653	19.873	16.3742	17.4626	16.9842	16.2281	18.5041	19.4832	19.6653	19.873				+	Ctrl_OMV_Fe_OMV	3.12527	0.00447814	-2.61914	-6.29387	42	42	42	77.3	77.3	77.3	59.995	0	323.31	1357200000	938	A0A6N4CVC9	A0A6N4CVC9	1503
A0A6N4CPD2	Biopolymer transporter ExbB (MotA/TolQ/ExbB proton channel family protein)	ASJ32_22000 GO994_21990	OTHER	CytoplasmicMembrane	U	COG0811 Biopolymer transport proteins	NaN	NaN	NaN	NaN	20.1956	19.0539	19.4492	18.8989	16.9384	16.0788	17.5185	16.9997	20.1956	19.0539	19.4492	18.8989				+	Ctrl_OMV_Fe_OMV	3.03527	0.00522106	-2.51556	-6.05175	3	3	3	20.5	20.5	20.5	19.744	0.00042974	23.88	119300000	56	A0A6N4CPD2	A0A6N4CPD2	260
Q7WYM8	Superoxide dismutase (EC 1.15.1.1)	sodA ASJ32_05385 GO994_19475	OTHER	Unknown	C	Destroys radicals which are normally produced within the cells and which are toxic to biological systems	NaN	NaN	NaN	NaN	18.635	19.0446	18.7758	19.559	17.3587	17.0922	16.6431	17.7099	18.635	19.0446	18.7758	19.559				+	Ctrl_OMV_Fe_OMV	2.99311	0.00543723	-1.80259	-5.94079	17	17	17	96.1	96.1	96.1	22.906	0	323.31	3001300000	224	Q7WYM8	Q7WYM8	2840
A0A6N4CWK7	Phosphonate ABC transporter substrate-binding protein	ASJ32_13815	SP(Sec/SPI)	Periplasmic	P	ABC transporter, phosphonate, periplasmic substrate-binding protein	19.2774	19.5658	18.1631	18.5263	20.5677	21.3726	21.3152	21.5834	19.2774	19.5658	18.1631	18.5263	20.5677	21.3726	21.3152	21.5834				+	Ctrl_OMV_Fe_OMV	2.98316	0.00553285	-2.3266	-5.91483	28	28	28	76.9	76.9	76.9	30.515	0	323.31	1149800000	604	A0A6N4CWK7	A0A6N4CWK7	1763
A0A6N4CS43	Peptidase S8 (S8 family serine peptidase)	ASJ32_19475 GO994_13560	SP(Sec/SPI)	Unknown	O	Subtilase family	22.1094	21.7243	21.3293	21.5103	24.7217	24.4711	23.203	23.6048	22.1094	21.7243	21.3293	21.5103	24.7217	24.4711	23.203	23.6048				+	Ctrl_OMV_Fe_OMV	2.97909	0.00555456	-2.33181	-5.90424	45	45	45	83.4	83.4	83.4	66.89	0	323.31	13005000000	4626	A0A6N4CS43	A0A6N4CS43	770
A0A6N4CTA9	DNA repair protein (DUF2799 domain-containing protein)	ASJ32_18290 GO994_03440	LIPO(Sec/SPII)	Cytoplasmic	S	Protein of unknown function (DUF2799)	21.4499	21.1446	21.3054	20.8408	21.9361	22.3354	22.2679	22.6103	21.4499	21.1446	21.3054	20.8408	21.9361	22.3354	22.2679	22.6103				+	Ctrl_OMV_Fe_OMV	2.93438	0.00602587	-1.10224	-5.78877	25	25	25	75.4	75.4	75.4	22.023	0	323.31	1231000000	716	A0A6N4CTA9	A0A6N4CTA9	1038
A0A6N4CV03	Energy transducer TonB	ASJ32_15945 GO994_19560	LIPO(Sec/SPII)	Unknown	M	Gram-negative bacterial TonB protein C-terminal	19.8378	19.8165	21.038	20.897	22.1128	22.4879	22.4917	22.8237	19.8378	19.8165	21.038	20.897	22.1128	22.4879	22.4917	22.8237				+	Ctrl_OMV_Fe_OMV	2.92574	0.00609141	-2.08166	-5.76666	13	13	13	71	71	71	17.183	0	323.31	790700000	603	A0A6N4CV03	A0A6N4CV03	1424
A0A6N4CP48	L,D-transpeptidase	ASJ32_20905	SP(Sec/SPI)	Unknown	M	L,D-transpeptidase catalytic domain	20.8667	20.8102	19.5728	20.063	22.0502	22.2717	22.0008	22.3436	20.8667	20.8102	19.5728	20.063	22.0502	22.2717	22.0008	22.3436				+	Ctrl_OMV_Fe_OMV	2.90102	0.00618587	-1.8384	-5.70371	28	28	28	55.3	55.3	55.3	33.32	0	323.31	4192700000	1507	A0A6N4CP48	A0A6N4CP48	227
A0A6N4CM84	Peptidase A2 domain-containing protein	ASJ32_20625 GO994_03585	LIPO(Sec/SPII)	Periplasmic	S	gag-polyprotein putative aspartyl protease	19.4197	19.3014	19.3938	19.0165	20.7345	20.6905	20.7861	21.9014	19.4197	19.3014	19.3938	19.0165	20.7345	20.6905	20.7861	21.9014				+	Ctrl_OMV_Fe_OMV	2.90077	0.00618587	-1.74528	-5.70308	25	25	25	63.8	63.8	63.8	42.991	0	323.31	574600000	446	A0A6N4CM84	A0A6N4CM84	95
A0A6N4CYR3	Amino acid ABC transporter substrate-binding protein (Transporter substrate-binding domain-containing protein)	ASJ32_09610 GO994_22240	SP(Sec/SPI)	Periplasmic	ET	Bacterial periplasmic substrate-binding proteins	NaN	NaN	NaN	NaN	18.5966	17.7027	18.1331	18.7062	16.0415	16.8498	15.5884	16.4948	18.5966	17.7027	18.1331	18.7062				+	Ctrl_OMV_Fe_OMV	2.90049	0.00618587	-2.041	-5.70238	31	31	30	83.7	83.7	81.3	27.917	0	323.31	1629400000	941	A0A6N4CYR3	A0A6N4CYR3	2209
A0A6N4CSP5	Ligand-gated channel protein	ASJ32_05285	LIPO(Sec/SPII)	OuterMembrane	H	TonB-dependent copper receptor	18.7182	18.4463	19.3296	19.2787	20.286	20.797	20.7086	21.498	18.7182	18.4463	19.3296	19.2787	20.286	20.797	20.7086	21.498				+	Ctrl_OMV_Fe_OMV	2.88854	0.00632044	-1.87921	-5.67214	43	43	43	62.9	62.9	62.9	72.697	0	259.34	407180000	571	A0A6N4CSP5	A0A6N4CSP5	892
A0A6N4CQD1	Uncharacterized protein	ASJ32_22010	SP(Sec/SPI)	Unknown	D	Protein of unknown function (DUF3450)	17.7867	14.9224	18.2017	16.5383	22.3541	20.6323	22.793	21.5525	17.7867	14.9224	18.2017	16.5383	22.3541	20.6323	22.793	21.5525				+	Ctrl_OMV_Fe_OMV	2.88678	0.00632044	-4.97068	-5.66769	31	31	31	72.3	72.3	72.3	28.235	0	323.31	885560000	581	A0A6N4CQD1	A0A6N4CQD1	433
A0A6N4CX17	Uncharacterized protein	ASJ32_12145	SP(Sec/SPI)	Unknown	S	Belongs to the UPF0319 family	23.6806	23.4686	23.4963	23.0522	24.1765	24.689	24.2731	24.5003	23.6806	23.4686	23.4963	23.0522	24.1765	24.689	24.2731	24.5003				+	Ctrl_OMV_Fe_OMV	2.86263	0.00657324	-0.985302	-5.60697	29	29	29	79.9	79.9	79.9	23.987	0	323.31	10606000000	3001	A0A6N4CX17	A0A6N4CX17	1865
A0A6N4CU48	Prolyl endopeptidase (Prolyl oligopeptidase family serine peptidase)	ASJ32_18420 GO994_03275	LIPO(Sec/SPII)	Periplasmic	E	Prolyl oligopeptidase, N-terminal beta-propeller domain	22.6143	22.6056	23.0213	23.3123	23.8501	24.2851	23.9143	24.4009	22.6143	22.6056	23.0213	23.3123	23.8501	24.2851	23.9143	24.4009				+	Ctrl_OMV_Fe_OMV	2.85984	0.00657324	-1.22426	-5.59998	55	55	55	73.7	73.7	73.7	79.139	0	323.31	3057000000	1698	A0A6N4CU48	A0A6N4CU48	1227
A0A6N4CXG0	Slp/YeaY family lipoprotein	ASJ32_12600 GO994_11850	LIPO(Sec/SPII)	Unknown	M	outer membrane lipoprotein Slp	22.1678	22.7515	22.5743	22.3216	23.2499	23.3784	23.1764	23.6076	22.1678	22.7515	22.5743	22.3216	23.2499	23.3784	23.1764	23.6076				+	Ctrl_OMV_Fe_OMV	2.85903	0.00657324	-0.899279	-5.59794	11	11	11	64.6	64.6	64.6	19.626	0	309.7	477110000	324	A0A6N4CXG0	A0A6N4CXG0	1946
A0A6N4CRX4	10 kDa chaperonin (GroES protein) (Protein Cpn10)	groES groS ASJ32_19815	OTHER	Cytoplasmic	O	Binds to Cpn60 in the presence of Mg-ATP and suppresses the ATPase activity of the latter	NaN	NaN	NaN	NaN	19.4489	19.2174	18.9568	18.5781	17.547	17.2222	16.039	16.2315	19.4489	19.2174	18.9568	18.5781				+	Ctrl_OMV_Fe_OMV	2.83612	0.00673307	-2.29041	-5.54085	24	24	24	100	100	100	10.269	0	323.31	23689000000	2894	A0A6N4CRX4	A0A6N4CRX4	732
A0A6N4CW60	Uncharacterized protein	ASJ32_14415 GO994_07780	LIPO(Sec/SPII)	Unknown	-	-	20.2097	19.9916	20.2644	20.0913	21.9281	24.0304	22.2523	23.4969	20.2097	19.9916	20.2644	20.0913	21.9281	24.0304	22.2523	23.4969				+	Ctrl_OMV_Fe_OMV	2.83518	0.00673307	-2.78766	-5.53851	8	8	8	58.9	58.9	58.9	11.396	0	112.83	318870000	352	A0A6N4CW60	A0A6N4CW60	1681
A0A6N4CL31	L,D-transpeptidase family protein (Peptidoglycan-binding protein)	ASJ32_07915 GO994_15905	SP(Sec/SPI)	Unknown	M	L,D-transpeptidase catalytic domain	20.5378	20.9639	19.8915	19.6218	22.4541	21.7342	22.7904	22.9656	20.5378	20.9639	19.8915	19.6218	22.4541	21.7342	22.7904	22.9656				+	Ctrl_OMV_Fe_OMV	2.80412	0.0070076	-2.23233	-5.46179	24	24	24	73.8	73.8	73.8	33.116	0	170.81	1372600000	643	A0A6N4CL31	A0A6N4CL31	48
Q6EVH0	S-layer protein (Virulence array protein) (Fragment)	vapA ASJ32_19910	SP(Sec/SPI)	Unknown	-	-	27.1306	25.8875	26.4522	26.8143	27.9518	27.9688	28.1875	28.1354	27.1306	25.8875	26.4522	26.8143	27.9518	27.9688	28.1875	28.1354				+	Ctrl_OMV_Fe_OMV	2.80057	0.0070076	-1.48975	-5.45307	62	62	62	81.3	81.3	81.3	52.916	0	323.31	206740000000	39634	Q6EVH0	Q6EVH0	2836
A0A6N4CZX6	Oligopeptide ABC transporter substrate-binding protein OppA (Peptide ABC transporter substrate-binding protein)	ASJ32_10165 GO994_08325	SP(Sec/SPI)	Periplasmic	E	Bacterial extracellular solute-binding proteins, family 5 Middle	21.5471	21.8491	21.498	20.8249	22.6068	22.9226	22.8402	23.4793	21.5471	21.8491	21.498	20.8249	22.6068	22.9226	22.8402	23.4793				+	Ctrl_OMV_Fe_OMV	2.7744	0.00732148	-1.53239	-5.3891	90	90	90	91.1	91.1	91.1	60.697	0	323.31	16645000000	5347	A0A6N4CZX6	A0A6N4CZX6	2421
A0A6N4CPP2	M48 family metalloprotease (Peptidase)	ASJ32_08200 GO994_15365	LIPO(Sec/SPII)	Unknown	M	Peptidase family M48	22.4349	22.4427	22.3593	22.2775	23.3729	23.4751	23.2933	24.2634	22.4349	22.4427	22.3593	22.2775	23.3729	23.4751	23.2933	24.2634				+	Ctrl_OMV_Fe_OMV	2.77153	0.00732148	-1.22258	-5.38212	20	20	20	70.9	70.9	70.9	28.36	0	323.31	1960700000	1159	A0A6N4CPP2	A0A6N4CPP2	316
A0A6N4CVB7	ATP-dependent Clp protease proteolytic subunit (EC 3.4.21.92) (Endopeptidase Clp)	clpP ASJ32_16855	OTHER	Cytoplasmic	OU	Cleaves peptides in various proteins in a process that requires ATP hydrolysis. Has a chymotrypsin-like activity. Plays a major role in the degradation of misfolded proteins	23.7795	24.4294	23.8785	23.4643	25.309	26.4533	25.4647	26.5715	23.7795	24.4294	23.8785	23.4643	25.309	26.4533	25.4647	26.5715				+	Ctrl_OMV_Fe_OMV	2.76551	0.00732148	-2.06174	-5.36749	16	16	16	57.5	57.5	57.5	22.814	0	323.31	13076000000	1538	A0A6N4CVB7	A0A6N4CVB7	1495
A0A6N4CZY2	Thioredoxin domain-containing protein	ASJ32_01015	SP(Sec/SPI)	Unknown	O	DSBA-like thioredoxin domain	22.456	22.265	21.6828	21.6231	23.0385	23.1714	23.4527	23.1947	22.456	22.265	21.6828	21.6231	23.0385	23.1714	23.4527	23.1947				+	Ctrl_OMV_Fe_OMV	2.75975	0.0073634	-1.2076	-5.35352	37	37	37	83.9	83.9	83.9	27.316	0	323.31	13692000000	2564	A0A6N4CZY2	A0A6N4CZY2	2426
A0A6N4CVM3	Peptidase M16	ASJ32_03995	SP(Sec/SPI)	Unknown	S	Insulinase (Peptidase family M16)	23.0355	22.8125	22.2977	22.1321	23.5827	23.7343	23.8515	23.9501	23.0355	22.8125	22.2977	22.1321	23.5827	23.7343	23.8515	23.9501				+	Ctrl_OMV_Fe_OMV	2.75391	0.00743083	-1.2102	-5.33937	123	123	123	88.3	88.3	88.3	102.85	0	323.31	19183000000	7063	A0A6N4CVM3	A0A6N4CVM3	1560
A0A6N4CVR6	Long-chain fatty acid outer membrane transporter	ASJ32_14520	SP(Sec/SPI)	OuterMembrane	I	Long-chain fatty acid	27.2218	27.0218	27.2362	27.2767	27.681	28.2775	27.9626	28.3876	27.2218	27.0218	27.2362	27.2767	27.681	28.2775	27.9626	28.3876				+	Ctrl_OMV_Fe_OMV	2.71007	0.00807083	-0.888092	-5.23406	31	31	31	68.5	68.5	68.5	46.374	0	323.31	19799000000	6689	A0A6N4CVR6	A0A6N4CVR6	1589
A0A6N4CSS3	Gamma-glutamyltransferase	ASJ32_19165	LIPO(Sec/SPII)	Periplasmic	M	Gamma-glutamyltranspeptidase	21.644	21.7545	21.2953	21.6756	22.1238	22.4367	22.3225	22.664	21.644	21.7545	21.2953	21.6756	22.1238	22.4367	22.3225	22.664				+	Ctrl_OMV_Fe_OMV	2.70873	0.00807083	-0.794412	-5.23086	36	36	36	61.6	61.6	61.6	61.964	0	323.31	3020000000	1664	A0A6N4CSS3	A0A6N4CSS3	909
A0A6N4CMV8	50S ribosomal protein L33	rpmG ASJ32_18970 GO994_00465	OTHER	Cytoplasmic	J	Belongs to the bacterial ribosomal protein bL33 family	NaN	NaN	NaN	NaN	19.0263	19.5241	18.7203	19.0784	17.1416	17.4325	15.4286	16.1098	19.0263	19.5241	18.7203	19.0784				+	Ctrl_OMV_Fe_OMV	2.69529	0.00828929	-2.55913	-5.19889	4	4	4	72.7	72.7	72.7	6.4215	0	162.5	528710000	163	A0A6N4CMV8	A0A6N4CMV8	129
A0A6N4CU91	Azurin	azu ASJ32_13515 GO994_16085	SP(Sec/SPI)	Periplasmic	C	Transfers electrons from cytochrome c551 to cytochrome oxidase	NaN	NaN	NaN	NaN	18.665	20.0913	18.0894	20.3347	16.4012	16.5305	16.5736	16.6326	18.665	20.0913	18.0894	20.3347				+	Ctrl_OMV_Fe_OMV	2.6294	0.00905309	-2.76062	-5.04403	11	11	11	73.3	73.3	73.3	15.482	0	121.14	140560000	165	A0A6N4CU91	A0A6N4CU91	1257
A0A6N4D0H8	Autotransporter	ASJ32_00930 GO994_06435	SP(Sec/SPI)	OuterMembrane	-	-	22.1928	22.3741	22.184	22.7807	23.1244	23.5398	23.3177	23.0767	22.1928	22.3741	22.184	22.7807	23.1244	23.5398	23.3177	23.0767				+	Ctrl_OMV_Fe_OMV	2.62693	0.00905309	-0.881739	-5.03828	21	21	21	67.5	67.5	67.5	22.62	0	323.31	2205000000	1248	A0A6N4D0H8	A0A6N4D0H8	2507
A0A6N4CT70	L,D-transpeptidase	ASJ32_18205	SP(Sec/SPI)	Unknown	M	L,D-transpeptidase catalytic domain	18.6589	18.7178	16.8629	17.1027	20.1976	21.0387	20.1408	21.2214	18.6589	18.7178	16.8629	17.1027	20.1976	21.0387	20.1408	21.2214				+	Ctrl_OMV_Fe_OMV	2.58801	0.00963635	-2.81406	-4.94834	22	22	22	68.2	68.2	68.2	33.686	0	323.31	408680000	392	A0A6N4CT70	A0A6N4CT70	1011
A0A6N4CWC2	Histidine decarboxylase (HDC) (EC 4.1.1.22)	hdc ASJ32_09645	OTHER	Cytoplasmic	E	decarboxylase	NaN	NaN	NaN	NaN	18.8369	18.969	19.4273	18.8206	17.6898	16.4693	15.3589	15.4584	18.8369	18.969	19.4273	18.8206				+	Ctrl_OMV_Fe_OMV	2.58093	0.00972013	-2.76934	-4.93211	25	25	25	54.5	54.5	54.5	43.652	0	323.31	1831700000	458	A0A6N4CWC2	A0A6N4CWC2	1718
A0A6N4CQ53	D-galactose-binding periplasmic protein (D-galactose/ D-glucose-binding protein)	mglB ASJ32_07645 GO994_20990	SP(Sec/SPI)	Periplasmic	G	Periplasmic binding protein domain	20.3825	19.758	18.9393	19.6491	21.0982	22.1061	21.601	21.2193	20.3825	19.758	18.9393	19.6491	21.0982	22.1061	21.601	21.2193				+	Ctrl_OMV_Fe_OMV	2.56417	0.00995125	-1.82391	-4.8938	24	24	24	75.9	75.9	75.9	35.16	0	323.31	615990000	384	A0A6N4CQ53	A0A6N4CQ53	389
A0A6N4CTP1	Succinyl-CoA synthetase subunit alpha	ASJ32_04205	LIPO(Sec/SPII)	Unknown	S	Endonuclease/Exonuclease/phosphatase family	21.8363	21.7318	22.7137	22.4042	23.3736	24.2072	23.3192	23.8406	21.8363	21.7318	22.7137	22.4042	23.3736	24.2072	23.3192	23.8406				+	Ctrl_OMV_Fe_OMV	2.53331	0.0104877	-1.51365	-4.82376	30	30	30	64.1	64.1	64.1	49.312	0	323.31	1977300000	1158	A0A6N4CTP1	A0A6N4CTP1	1135
A0A6N4CR68	MSHA biogenesis protein MshL	ASJ32_06320	LIPO(Sec/SPII)	OuterMembrane	NU	Secretin N-terminal domain	21.1097	21.2607	21.0131	21.2954	21.7675	21.4532	21.8198	21.903	21.1097	21.2607	21.0131	21.2954	21.7675	21.4532	21.8198	21.903				+	Ctrl_OMV_Fe_OMV	2.51556	0.0106895	-0.566168	-4.78378	35	35	35	58.1	58.1	58.1	59.779	0	323.31	1671700000	1097	A0A6N4CR68	A0A6N4CR68	586
A0A6N4CR78	Uncharacterized protein	ASJ32_06045 GO994_19180	SP(Sec/SPI)	Periplasmic	S	protein conserved in bacteria	18.3874	18.5215	17.6631	NaN	19.1682	19.0446	19.6108	19.768	18.3874	18.5215	17.6631	17.7963	19.1682	19.0446	19.6108	19.768				+	Ctrl_OMV_Fe_OMV	2.50499	0.0108084	-1.30583	-4.76006	16	16	16	62.6	62.6	62.6	20.622	0	323.31	3673900000	940	A0A6N4CR78	A0A6N4CR78	591
A0A6N4CUE6	Uncharacterized protein	ASJ32_18320 GO994_03410	LIPO(Sec/SPII)	Unknown	/	/	18.1654	18.8571	18.7935	18.1209	20.5449	20.0192	19.4935	20.9332	18.1654	18.8571	18.7935	18.1209	20.5449	20.0192	19.4935	20.9332				+	Ctrl_OMV_Fe_OMV	2.50454	0.0108084	-1.76347	-4.75908	4	4	4	57.3	57.3	57.3	8.0884	0	48.435	21020000	30	A0A6N4CUE6	A0A6N4CUE6	1291
A0A6N4CXQ6	OmpA-like domain-containing protein	ASJ32_11700	LIPO(Sec/SPII)	OuterMembrane	M	Belongs to the ompA family	20.3486	20.6064	19.9977	19.898	21.0783	21.7554	21.5515	22.3523	20.3486	20.6064	19.9977	19.898	21.0783	21.7554	21.5515	22.3523				+	Ctrl_OMV_Fe_OMV	2.49777	0.0109012	-1.47172	-4.74392	15	15	15	77.8	77.8	77.8	17.438	0	323.31	458500000	400	A0A6N4CXQ6	A0A6N4CXQ6	1999
A0A6N4CZE0	Glutamine synthetase (EC 6.3.1.2)	glnA ASJ32_10740	OTHER	Cytoplasmic	E	glutamine synthetase	25.1921	24.8472	22.8074	22.434	27.335	27.5696	26.7176	28.3173	25.1921	24.8472	22.8074	22.434	27.335	27.5696	26.7176	28.3173				+	Ctrl_OMV_Fe_OMV	2.49272	0.010957	-3.66472	-4.73264	53	53	53	99.8	99.8	99.8	51.809	0	323.31	40880000000	7627	A0A6N4CZE0	A0A6N4CZE0	2327
A0A6N4CPB7	Phosphate-binding protein	ASJ32_08205	SP(Sec/SPI)	CytoplasmicMembrane	P	PBP superfamily domain	17.8001	18.4584	18.3878	18.4394	19.3599	19.1305	20.1507	20.0668	17.8001	18.4584	18.3878	18.4394	19.3599	19.1305	20.1507	20.0668				+	Ctrl_OMV_Fe_OMV	2.47688	0.0112404	-1.40556	-4.69739	33	33	33	67.3	67.3	67.3	34.421	0	323.31	813420000	534	A0A6N4CPB7	A0A6N4CPB7	254
A0A6N4CQR9	Putrescine-binding periplasmic protein	ASJ32_07835 GO994_20805	SP(Sec/SPI)	Periplasmic	P	Required for the activity of the bacterial periplasmic transport system of putrescine	18.529	18.0428	16.982	17.459	18.9676	20.0083	19.9521	19.8357	18.529	18.0428	16.982	17.459	18.9676	20.0083	19.9521	19.8357				+	Ctrl_OMV_Fe_OMV	2.45728	0.0116385	-1.93767	-4.65399	18	18	18	62	62	62	39.698	0	323.31	507320000	392	A0A6N4CQR9	A0A6N4CQR9	504
A0A6N4CSF1	OMP_b-brl domain-containing protein	ASJ32_18885	LIPO(Sec/SPII)	Unknown	M	OmpA-like transmembrane domain	25.1112	24.8751	25.2343	24.7442	25.7941	26.1935	25.5898	26.4528	25.1112	24.8751	25.2343	24.7442	25.7941	26.1935	25.5898	26.4528				+	Ctrl_OMV_Fe_OMV	2.40603	0.0126206	-1.01634	-4.54171	11	11	11	43.8	43.8	43.8	22.665	0	323.31	3655200000	1683	A0A6N4CSF1	A0A6N4CSF1	836
A0A6N4CTB2	Uncharacterized protein	ASJ32_04710	LIPO(Sec/SPII)	CytoplasmicMembrane	S	Protein of unknown function (DUF3261)	NaN	NaN	18.3923	18.77	19.9109	20.3354	19.7206	20.9251	16.8528	17.1027	18.3923	18.77	19.9109	20.3354	19.7206	20.9251				+	Ctrl_OMV_Fe_OMV	2.38963	0.013001	-2.44355	-4.50611	4	4	4	21.4	21.4	21.4	20.555	0	73.362	31136000	46	A0A6N4CTB2	A0A6N4CTB2	1040
A0A6N4CUA3	DUF4136 domain-containing protein	ASJ32_00530 GO994_17150	LIPO(Sec/SPII)	CytoplasmicMembrane	/	/	21.4332	21.0786	21.3984	21.2959	22.1586	22.5978	21.9769	23.0841	21.4332	21.0786	21.3984	21.2959	22.1586	22.5978	21.9769	23.0841				+	Ctrl_OMV_Fe_OMV	2.35876	0.0137099	-1.15283	-4.43962	9	9	9	78	78	78	18.66	0	323.31	487380000	453	A0A6N4CUA3	A0A6N4CUA3	1264
A0A6N4CUB6	Uncharacterized protein	ASJ32_05025 GO994_04445	LIPO(Sec/SPII)	Unknown	O	Heat shock protein	24.2693	23.8278	24.5404	24.8014	25.086	25.7333	25.4839	25.5205	24.2693	23.8278	24.5404	24.8014	25.086	25.7333	25.4839	25.5205				+	Ctrl_OMV_Fe_OMV	2.35036	0.0138883	-1.09619	-4.42163	11	11	11	99.2	99.2	99.2	14.454	0	323.31	2624800000	713	A0A6N4CUB6	A0A6N4CUB6	1274
A0A6N4CTI0	High-affinity zinc uptake system protein ZnuA	ASJ32_03210	SP(Sec/SPI)	Periplasmic	P	Belongs to the bacterial solute-binding protein 9 family	21.8524	21.5255	20.8676	21.1043	22.3604	22.3293	23.2587	22.9605	21.8524	21.5255	20.8676	21.1043	22.3604	22.3293	23.2587	22.9605				+	Ctrl_OMV_Fe_OMV	2.33315	0.0142674	-1.38976	-4.3849	22	22	22	57.2	57.2	57.2	33.99	0	323.31	7074500000	1926	A0A6N4CTI0	A0A6N4CTI0	1090
A0A6N4CU36	Zn-dependent exopeptidase M28	ASJ32_05120	LIPO(Sec/SPII)	Extracellular	N	Catalyzes the sequential removal of 2 amino-terminal arginines from alkaline phosphatase isozyme 1 to form isozymes 2 and 3	22.4373	23.0433	23.5982	23.3026	24.2479	24.7789	24.1665	25.1819	22.4373	23.0433	23.5982	23.3026	24.2479	24.7789	24.1665	25.1819				+	Ctrl_OMV_Fe_OMV	2.32388	0.0144386	-1.49844	-4.36519	22	22	22	45.6	45.6	45.6	38.038	0	323.31	1397600000	675	A0A6N4CU36	A0A6N4CU36	1220
A0A6N4CYM9	Ferritin (EC 1.16.3.2)	ftnA ASJ32_09360 GO994_00260	OTHER	Cytoplasmic	P	Iron-storage protein	20.9295	21.3997	19.6074	18.4816	22.7285	23.481	24.0685	25.5243	20.9295	21.3997	19.6074	18.4816	22.7285	23.481	24.0685	25.5243				+	Ctrl_OMV_Fe_OMV	2.30984	0.0148666	-3.84603	-4.33544	14	14	14	58.6	58.6	58.6	19.821	0	206.28	561620000	406	A0A6N4CYM9	A0A6N4CYM9	2188
A0A6N4CMG9	Glycosidase	ASJ32_05290 GO994_19375	LIPO(Sec/SPII)	Cytoplasmic	G	Alpha amylase, catalytic domain	19.5999	19.7025	19.7394	19.7736	20.9273	21.8108	20.3173	21.5157	19.5999	19.7025	19.7394	19.7736	20.9273	21.8108	20.3173	21.5157				+	Ctrl_OMV_Fe_OMV	2.30342	0.0150413	-1.43894	-4.32187	18	18	18	40.1	40.1	40.1	57.488	0	323.31	135120000	207	A0A6N4CMG9	A0A6N4CMG9	104
A0A6N4CMS5	Peptidase P60	ASJ32_07935	OTHER	Unknown	M	NlpC/P60 family	NaN	NaN	NaN	NaN	NaN	18.8396	18.6691	18.6265	16.2839	17.4689	15.611	15.376	17.7095	18.8396	18.6691	18.6265				+	Ctrl_OMV_Fe_OMV	2.27546	0.015796	-2.27622	-4.26309	4	4	4	29.2	29.2	29.2	17.377	0.00037566	3.9406	7537400	19	A0A6N4CMS5	A0A6N4CMS5	122
A0A6P1HDC3	Lytic murein transglycosylase B (EC 4.2.2.-) (Murein hydrolase effector LrgB)	mltB ASJ32_02975 GO994_09140	LIPO(Sec/SPII)	CytoplasmicMembrane	M	Lytic murein transglycosylase B	22.8582	23.1084	22.7734	22.733	23.2942	24.1117	24.12	24.5154	22.8582	23.1084	22.7734	22.733	23.2942	24.1117	24.12	24.5154				+	Ctrl_OMV_Fe_OMV	2.25894	0.0162291	-1.14207	-4.22858	29	29	29	76.8	76.8	76.8	40.607	0	323.31	2927500000	1227	A0A6P1HDC3	A0A6P1HDC3	2725
A0A0K0MDT1	Non-ribosomal peptide synthetase (Peptide synthetase)	amoF ASJ32_11185	OTHER	CytoplasmicMembrane	Q	COG1020 Non-ribosomal peptide synthetase modules and related proteins	NaN	NaN	NaN	NaN	18.9853	19.6382	19.914	18.629	17.6888	18.3107	17.0323	17.0122	18.9853	19.6382	19.914	18.629				+	Ctrl_OMV_Fe_OMV	2.23	0.0168374	-1.78059	-4.16848	88	88	88	66	66	66	111.43	0	323.31	28878000000	3277	A0A0K0MDT1	A0A0K0MDT1	2
A0A6N4CSV6	Hemolysin	ASJ32_18165	SP(Sec/SPI)	Extracellular	S	hemolysis in other organism	18.1416	17.7046	18.5802	18.1243	18.766	19.2897	18.9067	19.2336	18.1416	17.7046	18.5802	18.1243	18.766	19.2897	18.9067	19.2336				+	Ctrl_OMV_Fe_OMV	2.22573	0.0168986	-0.911343	-4.15967	45	45	45	69.7	69.7	69.7	68.528	0	323.31	877010000	678	A0A6N4CSV6	A0A6N4CSV6	932
A0A6N4CW41	DUF2987 domain-containing protein	ASJ32_13080 GO994_10615	SP(Sec/SPI)	Unknown	S	Protein of unknown function (DUF2987)	NaN	NaN	NaN	NaN	18.2191	18.4268	17.7367	18.4785	15.9733	15.1382	17.4562	15.5733	18.2191	18.4268	17.7367	18.4785				+	Ctrl_OMV_Fe_OMV	2.19919	0.0177403	-2.17999	-4.10505	13	13	13	61.9	61.9	61.9	24.557	0	175.24	226170000	200	A0A6N4CW41	A0A6N4CW41	1666
A0A6N4CTI7	Peptidase P60	ASJ32_18160	LIPO(Sec/SPII)	Unknown	M	NlpC/P60 family	NaN	NaN	NaN	NaN	18.6834	18.3285	18.7328	20.5269	17.3308	16.0512	16.5542	17.0196	18.6834	18.3285	18.7328	20.5269				+	Ctrl_OMV_Fe_OMV	2.19677	0.0177403	-2.32893	-4.1001	6	6	6	40.7	40.7	40.7	16.368	0	140.11	57472000	41	A0A6N4CTI7	A0A6N4CTI7	1095
A0A6N4CV77	Sulfurtransferase (Thiosulfate sulfurtransferase)	ASJ32_05100 GO994_04375	SP(Sec/SPI)	Periplasmic	M	Rhodanese Homology Domain	18.9736	18.3442	18.0847	17.8757	18.9614	20.2724	19.9198	20.1255	18.9736	18.3442	18.0847	17.8757	18.9614	20.2724	19.9198	20.1255				+	Ctrl_OMV_Fe_OMV	2.12584	0.0202497	-1.50023	-3.95617	43	43	43	83.3	83.3	83.3	48.313	0	323.31	1270800000	830	A0A6N4CV77	A0A6N4CV77	1470
A0A6N4CWY0	2,3-dihydroxybenzoate-AMP ligase (EC 2.7.7.58)	entE ASJ32_11195	OTHER	Cytoplasmic	Q	AMP-binding enzyme C-terminal domain	NaN	NaN	NaN	NaN	18.2864	19.1579	18.679	18.4422	17.0255	17.3461	14.8423	15.7629	18.2864	19.1579	18.679	18.4422				+	Ctrl_OMV_Fe_OMV	2.11485	0.0204353	-2.39717	-3.93412	49	49	49	73.7	73.7	73.7	59.936	0	323.31	12261000000	1636	A0A6N4CWY0	A0A6N4CWY0	1843
A0A6N4CV26	Glucokinase (EC 2.7.1.2) (Glucose kinase)	glk ASJ32_14135	OTHER	Cytoplasmic	F	Belongs to the bacterial glucokinase family	NaN	NaN	NaN	NaN	18.1416	19.5538	17.7255	19.3231	16.643	17.3808	16.5441	16.1421	18.1416	19.5538	17.7255	19.3231				+	Ctrl_OMV_Fe_OMV	2.09914	0.0209502	-2.00849	-3.90271	17	17	17	59.3	59.3	59.3	34.131	0	314.18	532140000	436	A0A6N4CV26	A0A6N4CV26	1435
A0A6N4CZK7	Outer membrane protein assembly factor BamC	bamC ASJ32_00135	LIPO(Sec/SPII)	OuterMembrane	M	Part of the outer membrane protein assembly complex, which is involved in assembly and insertion of beta-barrel proteins into the outer membrane	26.5992	26.4525	26.796	27.0846	27.1399	27.4966	27.4557	27.2978	26.5992	26.4525	26.796	27.0846	27.1399	27.4966	27.4557	27.2978				+	Ctrl_OMV_Fe_OMV	2.0791	0.0215911	-0.61445	-3.86282	32	32	32	79.7	79.7	79.7	40.513	0	323.31	25657000000	4443	A0A6N4CZK7	A0A6N4CZK7	2362
A0A6N4CQS4	Glycerol dehydrogenase (Iron-containing alcohol dehydrogenase)	ASJ32_07155 GO994_11110	OTHER	Cytoplasmic	C	glycerol dehydrogenase	19.0321	19.7953	17.9263	17.1017	20.3269	21.5761	20.7758	21.1459	19.0321	19.7953	17.9263	17.1017	20.3269	21.5761	20.7758	21.1459				+	Ctrl_OMV_Fe_OMV	2.06109	0.0220361	-2.49232	-3.82717	23	23	23	63.7	63.7	63.7	40.535	0	323.31	1166300000	364	A0A6N4CQS4	A0A6N4CQS4	507
A0A6N4CTL7	Uncharacterized protein	ASJ32_18760	LIPO(Sec/SPII)	Periplasmic	-	-	18.6968	19.0983	19.4059	18.5542	20.0203	19.8256	19.7462	20.7682	18.6968	19.0983	19.4059	18.5542	20.0203	19.8256	19.7462	20.7682				+	Ctrl_OMV_Fe_OMV	2.04584	0.0226816	-1.15124	-3.79711	34	34	34	73.4	73.4	73.4	41.558	0	323.31	656920000	794	A0A6N4CTL7	A0A6N4CTL7	1118
A0A6N4D018	Porin	ASJ32_00865	SP(Sec/SPI)	Unknown	S	Outer membrane porin	22.1284	22.361	22.6855	22.8687	23.2178	23.5544	22.9835	23.4629	22.1284	22.361	22.6855	22.8687	23.2178	23.5544	22.9835	23.4629				+	Ctrl_OMV_Fe_OMV	2.04405	0.0226816	-0.793746	-3.79359	28	28	28	56.1	56.1	56.1	52.427	0	323.31	1530600000	1219	A0A6N4D018	A0A6N4D018	2445
A0A6N4CVV4	Peptide ABC transporter substrate-binding protein	ASJ32_15795	SP(Sec/SPI)	Periplasmic	E	Bacterial extracellular solute-binding proteins, family 5 Middle	18.9845	19.1243	18.8084	18.3937	19.4803	20.241	19.4319	20.2873	18.9845	19.1243	18.8084	18.3937	19.4803	20.241	19.4319	20.2873				+	Ctrl_OMV_Fe_OMV	1.97379	0.0253577	-1.03234	-3.65662	43	43	43	80.9	80.9	80.9	59.911	0	323.31	1931300000	1174	A0A6N4CVV4	A0A6N4CVV4	1616
A0A6N4CZW4	Maltoporin (Maltose-inducible porin)	lamB ASJ32_01255	SP(Sec/SPI)	OuterMembrane	M	involved in the transport of maltose and maltodextrins	24.9407	25.1114	25.8824	26.0329	26.2861	26.7525	26.5012	26.6794	24.9407	25.1114	25.8824	26.0329	26.2861	26.7525	26.5012	26.6794				+	Ctrl_OMV_Fe_OMV	1.96505	0.025684	-1.06293	-3.63977	47	47	47	78	78	78	48.899	0	323.31	16444000000	11466	A0A6N4CZW4	A0A6N4CZW4	2416
A5I8G7	Heme utilization protein HutZ	hutZ ASJ32_00445	OTHER	Cytoplasmic	P	Pfam:Pyridox_oxidase	NaN	NaN	NaN	NaN	17.9293	17.924	18.0256	17.71	16.849	16.2723	15.008	16.936	17.9293	17.924	18.0256	17.71				+	Ctrl_OMV_Fe_OMV	1.95903	0.0258979	-1.63091	-3.62816	32	32	32	96.2	96.2	96.2	20.843	0	323.31	9174300000	1036	A5I8G7	A5I8G7	2748
A0A6N4CYW9	Aminopeptidase (EC 3.4.11.23)	ASJ32_01940	OTHER	Cytoplasmic	E	Probably plays an important role in intracellular peptide degradation	23.0033	22.9138	21.7755	21.4691	23.2491	24.2072	24.0509	24.5398	23.0033	22.9138	21.7755	21.4691	23.2491	24.2072	24.0509	24.5398				+	Ctrl_OMV_Fe_OMV	1.94661	0.0263451	-1.72133	-3.60428	32	30	30	85.9	84.1	84.1	45.767	0	323.31	8547100000	2658	A0A6N4CYW9	A0A6N4CYW9	2237
A0A6N4CZL3	Uncharacterized protein	ASJ32_00450 GO994_17230	LIPO(Sec/SPII)	Unknown	-	-	20.1431	20.2216	NaN	19.752	22.5069	23.3442	22.3919	23.5241	20.1431	20.2216	15.8169	19.752	22.5069	23.3442	22.3919	23.5241				+	Ctrl_OMV_Fe_OMV	1.94564	0.0263451	-3.95836	-3.60244	15	15	15	62.7	62.7	62.7	15.044	0	323.31	378840000	229	A0A6N4CZL3	A0A6N4CZL3	2367
A0A6N4CX28	Amino acid ABC transporter substrate-binding protein	ASJ32_12205	SP(Sec/SPI)	Periplasmic	ET	Ligated ion channel L-glutamate- and glycine-binding site	21.2309	21.392	20.8069	20.4364	22.0869	21.7244	21.8693	21.6018	21.2309	21.392	20.8069	20.4364	22.0869	21.7244	21.8693	21.6018				+	Ctrl_OMV_Fe_OMV	1.92716	0.0272952	-0.854014	-3.56706	32	32	32	73.5	73.5	73.5	29.038	0	323.31	5672300000	1456	A0A6N4CX28	A0A6N4CX28	1873
A0A6N4CQQ8	Uncharacterized protein	ASJ32_18250 GO994_03480	LIPO(Sec/SPII)	Unknown	/	/	19.4404	19.2376	20.3136	20.1093	20.846	21.2345	20.6015	21.9482	19.4404	19.2376	20.3136	20.1093	20.846	21.2345	20.6015	21.9482				+	Ctrl_OMV_Fe_OMV	1.90779	0.028339	-1.38233	-3.53014	11	11	11	64.3	64.3	64.3	16.815	0	120.4	47836000	87	A0A6N4CQQ8	A0A6N4CQQ8	497
A0A6N4CUM3	DUF3299 domain-containing protein	ASJ32_17545 GO994_03740	SP(Sec/SPI)	Unknown	S	Protein of unknown function (DUF3299)	NaN	NaN	18.8096	NaN	19.989	19.2978	20.3893	21.165	17.894	17.6116	18.8096	15.6286	19.989	19.2978	20.3893	21.165				+	Ctrl_OMV_Fe_OMV	1.89971	0.0287354	-2.72432	-3.51481	11	11	11	47.8	47.8	47.8	17.342	0	175.38	328950000	305	A0A6N4CUM3	A0A6N4CUM3	1344
A0A6N4CPJ3	Outer membrane lipoprotein Blc	ASJ32_07560	LIPO(Sec/SPII)	OuterMembrane	M	Lipocalin-like domain	22.3146	22.6379	23.0181	22.8984	23.6526	23.07	23.5071	23.4262	22.3146	22.6379	23.0181	22.8984	23.6526	23.07	23.5071	23.4262				+	Ctrl_OMV_Fe_OMV	1.89112	0.0289055	-0.696722	-3.49852	20	20	20	72.4	72.4	72.4	19.049	0	240.79	1086900000	497	A0A6N4CPJ3	A0A6N4CPJ3	291
A0A6N4CSQ8	Dipeptidase (EC 3.4.-.-)	ASJ32_19970 GO994_13365	LIPO(Sec/SPII)	Unknown	E	Peptidase family C69	20.8261	20.6252	19.8844	19.5483	20.9359	21.7168	21.4704	21.8827	20.8261	20.6252	19.8844	19.5483	20.9359	21.7168	21.4704	21.8827				+	Ctrl_OMV_Fe_OMV	1.8909	0.0289055	-1.28045	-3.49811	53	53	53	77.1	77.1	77.1	55.589	0	323.31	2097800000	1450	A0A6N4CSQ8	A0A6N4CSQ8	900
[truncated: 391 more rows]

## Sheet: Sign_changed_Proteins_Temp
Significantly changed proteins in elevated temperature (Temp) condition
[truncated: 439 more rows]

## Sheet: Sign_changed_Proteins_AB
Significantly changed proteins in antibiotic (AB) condition
[truncated: 687 more rows]
